# Supplementary material
Source: bioRxiv or medRxiv preprint supplement (https://www.medrxiv.org/highwire/filestream/73613/field_highwire_adjunct_files/2/2020.03.12.20034165-3.pdf)
Supplement: Supplementary file [file 2020.03.12.20034165-3.pdf]

### **Supplementary Table 3**

All genes with differential expression between POP and non-POP tissues of 12 premenopausal women with POP

| <b>Gene</b>            | <b>FC</b> | <b>P value</b> | <b>Corr P value</b> |
|------------------------|-----------|----------------|---------------------|
| <i>THC2296596</i>      | -2,85     | 1,12E-09       | 3,49E-05            |
| <i>COLEC12</i>         | -2,63     | 2,13E-08       | 1,16E-04            |
| <i>A_32_P171043</i>    | -2,55     | 2,25E-08       | 1,16E-04            |
| <i>BC069781</i>        | -1,93     | 1,84E-08       | 1,16E-04            |
| <i>THC2340695</i>      | 1,86      | 1,59E-08       | 1,16E-04            |
| <i>WEE1</i>            | 2,04      | 1,59E-08       | 1,16E-04            |
| <i>GLI1</i>            | -1,81     | 3,21E-08       | 1,25E-04            |
| <i>ZNF550</i>          | -1,62     | 3,12E-08       | 1,25E-04            |
| <i>FLJ14397</i>        | -1,48     | 1,00E-07       | 3,47E-04            |
| <i>CCBE1</i>           | -1,83     | 1,16E-07       | 3,60E-04            |
| <i>LOC63920</i>        | -1,72     | 1,27E-07       | 3,60E-04            |
| <i>THC2376725</i>      | -1,84     | 1,58E-07       | 3,77E-04            |
| <i>BX352604</i>        | 1,42      | 1,46E-07       | 3,77E-04            |
| <i>H19</i>             | -3,92     | 2,04E-07       | 4,12E-04            |
| <i>THC2308802</i>      | -1,70     | 2,15E-07       | 4,12E-04            |
| <i>THC2378401</i>      | -1,66     | 2,25E-07       | 4,12E-04            |
| <i>THC2374163</i>      | -1,56     | 2,12E-07       | 4,12E-04            |
| <i>TIGD5</i>           | -1,37     | 2,58E-07       | 4,22E-04            |
| <i>THC2442727</i>      | 2,00      | 2,52E-07       | 4,22E-04            |
| <i>ZNF545</i>          | -1,35     | 3,07E-07       | 4,77E-04            |
| <i>AK023574</i>        | -1,95     | 4,88E-07       | 4,87E-04            |
| <i>THC2280343</i>      | -1,58     | 4,14E-07       | 4,87E-04            |
| <i>AK056073</i>        | -1,54     | 4,60E-07       | 4,87E-04            |
| <i>CHST12</i>          | -1,30     | 5,23E-07       | 4,87E-04            |
| <i>FLJ20558</i>        | -1,22     | 5,48E-07       | 4,87E-04            |
| <i>MEN1</i>            | -1,17     | 4,64E-07       | 4,87E-04            |
| <i>OR7E156P</i>        | 1,24      | 4,13E-07       | 4,87E-04            |
| <i>C9orf21</i>         | 1,52      | 5,03E-07       | 4,87E-04            |
| <i>THC2395355</i>      | 1,63      | 3,94E-07       | 4,87E-04            |
| <i>ABL2</i>            | 1,82      | 4,38E-07       | 4,87E-04            |
| <i>ENST00000308482</i> | 1,89      | 4,64E-07       | 4,87E-04            |
| <i>ARID5A</i>          | 2,67      | 4,89E-07       | 4,87E-04            |
| <i>A_23_P123234</i>    | 2,84      | 4,78E-07       | 4,87E-04            |
| <i>TNFRSF12A</i>       | 3,11      | 4,08E-07       | 4,87E-04            |
| <i>THC2314201</i>      | 6,44      | 5,38E-07       | 4,87E-04            |
| <i>FLJ40142</i>        | -1,69     | 5,73E-07       | 4,94E-04            |
| <i>MGLL</i>            | 1,34      | 6,06E-07       | 5,09E-04            |
| <i>AF086011</i>        | -1,65     | 6,75E-07       | 5,42E-04            |
| <i>BC021857</i>        | -1,54     | 6,98E-07       | 5,42E-04            |
| <i>NFATC2</i>          | 2,35      | 6,95E-07       | 5,42E-04            |
| <i>U94902</i>          | 2,28      | 7,66E-07       | 5,81E-04            |
| <i>EMX2OS</i>          | -2,19     | 8,15E-07       | 6,03E-04            |
| <i>THC2341051</i>      | -1,34     | 9,05E-07       | 6,39E-04            |

|                        |       |          |          |
|------------------------|-------|----------|----------|
| <i>ENST00000381802</i> | 2,33  | 9,01E-07 | 6,39E-04 |
| <i>A_32_P148047</i>    | -1,60 | 1,07E-06 | 6,46E-04 |
| <i>THC2443829</i>      | -1,39 | 1,01E-06 | 6,46E-04 |
| <i>CSNK1A1</i>         | 1,26  | 1,04E-06 | 6,46E-04 |
| <i>SBDS</i>            | 1,27  | 9,39E-07 | 6,46E-04 |
| <i>ABCB4</i>           | 1,29  | 1,10E-06 | 6,46E-04 |
| <i>ZCSL2</i>           | 1,49  | 1,04E-06 | 6,46E-04 |
| <i>PDLIM1</i>          | 1,49  | 1,08E-06 | 6,46E-04 |
| <i>F2R</i>             | 1,52  | 1,10E-06 | 6,46E-04 |
| <i>BF475893</i>        | 3,07  | 1,09E-06 | 6,46E-04 |
| <i>THC2322881</i>      | -1,22 | 1,12E-06 | 6,47E-04 |
| <i>RPUSD2</i>          | -1,37 | 1,22E-06 | 6,65E-04 |
| <i>ENST00000370395</i> | 1,50  | 1,22E-06 | 6,65E-04 |
| <i>JUND</i>            | 1,64  | 1,21E-06 | 6,65E-04 |
| <i>FLJ27365</i>        | -1,51 | 1,26E-06 | 6,75E-04 |
| <i>PTMA</i>            | 1,23  | 1,29E-06 | 6,79E-04 |
| <i>LRRFIP1</i>         | 1,26  | 1,33E-06 | 6,89E-04 |
| <i>U92981</i>          | -2,15 | 1,36E-06 | 6,92E-04 |
| <i>A_24_P152315</i>    | 1,22  | 1,38E-06 | 6,92E-04 |
| <i>FAM84B</i>          | -1,60 | 1,44E-06 | 7,13E-04 |
| <i>THC2273031</i>      | -1,36 | 1,55E-06 | 7,34E-04 |
| <i>PTPN11</i>          | 1,20  | 1,54E-06 | 7,34E-04 |
| <i>C14orf147</i>       | 1,27  | 1,56E-06 | 7,34E-04 |
| <i>MCTP1</i>           | 1,57  | 1,60E-06 | 7,43E-04 |
| <i>SURB7</i>           | 1,19  | 1,63E-06 | 7,44E-04 |
| <i>LOC92312</i>        | -1,75 | 1,86E-06 | 8,12E-04 |
| <i>AK023572</i>        | 1,84  | 1,84E-06 | 8,12E-04 |
| <i>SERPINE1</i>        | 2,09  | 1,81E-06 | 8,12E-04 |
| <i>THC2393621</i>      | -1,62 | 2,00E-06 | 8,31E-04 |
| <i>A_32_P2303</i>      | -1,49 | 2,00E-06 | 8,31E-04 |
| <i>MCM3APAS</i>        | -1,37 | 1,95E-06 | 8,31E-04 |
| <i>BICD1</i>           | 1,24  | 2,02E-06 | 8,31E-04 |
| <i>STK38L</i>          | 1,49  | 2,03E-06 | 8,31E-04 |
| <i>HOXA9</i>           | -1,53 | 2,10E-06 | 8,40E-04 |
| <i>MLF1</i>            | 1,77  | 2,11E-06 | 8,40E-04 |
| <i>THC2408277</i>      | -1,88 | 2,23E-06 | 8,60E-04 |
| <i>ZNF30</i>           | -1,45 | 2,26E-06 | 8,60E-04 |
| <i>BC041996</i>        | -1,34 | 2,27E-06 | 8,60E-04 |
| <i>GSPT2</i>           | -1,20 | 2,24E-06 | 8,60E-04 |
| <i>THC2350463</i>      | -1,40 | 2,36E-06 | 8,85E-04 |
| <i>AK021543</i>        | -1,64 | 2,51E-06 | 9,01E-04 |
| <i>AK093987</i>        | -1,44 | 2,55E-06 | 9,01E-04 |
| <i>THC2279918</i>      | -1,36 | 2,53E-06 | 9,01E-04 |
| <i>AA292106</i>        | 1,23  | 2,48E-06 | 9,01E-04 |

|                        |       |          |          |
|------------------------|-------|----------|----------|
| <i>RAB32</i>           | 1,36  | 2,55E-06 | 9,01E-04 |
| <i>HOXB5</i>           | -1,56 | 2,60E-06 | 9,02E-04 |
| <i>PRMT6</i>           | -1,28 | 2,61E-06 | 9,02E-04 |
| <i>FMO1</i>            | -2,15 | 2,69E-06 | 9,19E-04 |
| <i>GVIN1</i>           | -1,33 | 2,84E-06 | 9,42E-04 |
| <i>COQ10B</i>          | 1,32  | 2,83E-06 | 9,42E-04 |
| <i>RND3</i>            | 2,29  | 2,85E-06 | 9,42E-04 |
| <i>SALL3</i>           | 2,23  | 2,95E-06 | 9,66E-04 |
| <i>SLC13A3</i>         | -1,33 | 3,02E-06 | 9,77E-04 |
| <i>ENST00000328644</i> | 1,41  | 3,12E-06 | 9,98E-04 |
| <i>THC2336861</i>      | -1,74 | 3,17E-06 | 1,00E-03 |
| <i>DUSP8</i>           | 1,60  | 3,22E-06 | 1,01E-03 |
| <i>TGFB2</i>           | 1,68  | 3,28E-06 | 1,02E-03 |
| <i>BX538250</i>        | -1,34 | 3,35E-06 | 1,03E-03 |
| <i>DSCR1</i>           | 2,49  | 3,42E-06 | 1,04E-03 |
| <i>A_32_P177300</i>    | -1,64 | 3,70E-06 | 1,05E-03 |
| <i>PARS2</i>           | -1,47 | 3,56E-06 | 1,05E-03 |
| <i>THC2439328</i>      | -1,44 | 3,70E-06 | 1,05E-03 |
| <i>THC2283996</i>      | -1,41 | 3,64E-06 | 1,05E-03 |
| <i>THC2406168</i>      | -1,27 | 3,63E-06 | 1,05E-03 |
| <i>AK093429</i>        | 1,18  | 3,51E-06 | 1,05E-03 |
| <i>NEDD9</i>           | 2,01  | 3,64E-06 | 1,05E-03 |
| <i>U88892</i>          | 2,20  | 3,63E-06 | 1,05E-03 |
| <i>THC2439426</i>      | -2,04 | 3,93E-06 | 1,05E-03 |
| <i>AW340352</i>        | -1,56 | 3,94E-06 | 1,05E-03 |
| <i>FAM78A</i>          | -1,46 | 3,90E-06 | 1,05E-03 |
| <i>ZNF606</i>          | -1,34 | 3,99E-06 | 1,05E-03 |
| <i>SREBF1</i>          | -1,31 | 3,99E-06 | 1,05E-03 |
| <i>HBLD1</i>           | -1,26 | 3,85E-06 | 1,05E-03 |
| <i>THC2432742</i>      | -1,25 | 3,80E-06 | 1,05E-03 |
| <i>SLITRK6</i>         | 2,04  | 3,79E-06 | 1,05E-03 |
| <i>SCCPDH</i>          | 1,21  | 4,12E-06 | 1,07E-03 |
| <i>A_24_P92823</i>     | 1,49  | 4,15E-06 | 1,07E-03 |
| <i>TRIB1</i>           | 3,51  | 4,25E-06 | 1,09E-03 |
| <i>M28219</i>          | 1,41  | 4,48E-06 | 1,14E-03 |
| <i>C14orf80</i>        | 1,83  | 4,52E-06 | 1,14E-03 |
| <i>AK090766</i>        | -1,42 | 4,88E-06 | 1,18E-03 |
| <i>THC2363557</i>      | -1,31 | 4,88E-06 | 1,18E-03 |
| <i>PPP1R3E</i>         | -1,30 | 4,82E-06 | 1,18E-03 |
| <i>ZNF485</i>          | -1,29 | 4,78E-06 | 1,18E-03 |
| <i>BU618641</i>        | 1,42  | 4,84E-06 | 1,18E-03 |
| <i>RP11-138L21.1</i>   | 1,49  | 4,82E-06 | 1,18E-03 |
| <i>AK021576</i>        | -1,42 | 4,95E-06 | 1,18E-03 |
| <i>ACRC</i>            | -1,37 | 4,99E-06 | 1,18E-03 |

|                        |       |          |          |
|------------------------|-------|----------|----------|
| <i>ENST00000221282</i> | -1,48 | 5,12E-06 | 1,21E-03 |
| <i>THC2314177</i>      | -1,41 | 5,36E-06 | 1,24E-03 |
| <i>TAGLN2</i>          | 1,41  | 5,33E-06 | 1,24E-03 |
| <i>THC2371907</i>      | 1,41  | 5,39E-06 | 1,24E-03 |
| <i>THC2347318</i>      | -1,50 | 5,54E-06 | 1,25E-03 |
| <i>A_32_P121674</i>    | -1,45 | 5,57E-06 | 1,25E-03 |
| <i>A_32_P36835</i>     | -1,36 | 5,56E-06 | 1,25E-03 |
| <i>CENTB1</i>          | -1,25 | 5,57E-06 | 1,25E-03 |
| <i>RAD54B</i>          | -1,26 | 5,64E-06 | 1,25E-03 |
| <i>THC2266474</i>      | -1,35 | 5,81E-06 | 1,26E-03 |
| <i>AF289567</i>        | -1,33 | 5,79E-06 | 1,26E-03 |
| <i>KIAA1822L</i>       | 2,01  | 5,88E-06 | 1,26E-03 |
| <i>U94903</i>          | 2,47  | 5,87E-06 | 1,26E-03 |
| <i>A_24_P930049</i>    | 2,84  | 5,87E-06 | 1,26E-03 |
| <i>BC017507</i>        | -1,38 | 5,95E-06 | 1,27E-03 |
| <i>THC2406579</i>      | -1,33 | 6,02E-06 | 1,27E-03 |
| <i>AK096685</i>        | 1,50  | 6,05E-06 | 1,27E-03 |
| <i>A_32_P34064</i>     | -1,52 | 6,13E-06 | 1,28E-03 |
| <i>AK092379</i>        | -1,53 | 6,54E-06 | 1,30E-03 |
| <i>EMID1</i>           | -1,30 | 6,63E-06 | 1,30E-03 |
| <i>NS3BP</i>           | -1,30 | 6,63E-06 | 1,30E-03 |
| <i>GPR44</i>           | -1,20 | 6,28E-06 | 1,30E-03 |
| <i>HABP4</i>           | 1,27  | 6,54E-06 | 1,30E-03 |
| <i>ENST00000344556</i> | 1,29  | 6,38E-06 | 1,30E-03 |
| <i>MYO5A</i>           | 1,30  | 6,63E-06 | 1,30E-03 |
| <i>ENST00000371207</i> | 1,32  | 6,52E-06 | 1,30E-03 |
| <i>TAF13</i>           | 1,46  | 6,46E-06 | 1,30E-03 |
| <i>A_32_P207986</i>    | 1,55  | 6,35E-06 | 1,30E-03 |
| <i>PCDHGC4</i>         | 1,29  | 6,74E-06 | 1,31E-03 |
| <i>CDON</i>            | -1,77 | 6,92E-06 | 1,32E-03 |
| <i>PTN</i>             | -1,69 | 6,88E-06 | 1,32E-03 |
| <i>HBEGF</i>           | 1,94  | 6,91E-06 | 1,32E-03 |
| <i>A_32_P200820</i>    | 1,22  | 6,98E-06 | 1,32E-03 |
| <i>A_23_P210285</i>    | 1,28  | 7,29E-06 | 1,36E-03 |
| <i>ENST00000276938</i> | 1,30  | 7,28E-06 | 1,36E-03 |
| <i>LOC338620</i>       | 1,55  | 7,26E-06 | 1,36E-03 |
| <i>LOC132241</i>       | -1,51 | 7,46E-06 | 1,38E-03 |
| <i>AK055372</i>        | -1,58 | 7,68E-06 | 1,39E-03 |
| <i>ENST00000371079</i> | -1,42 | 7,60E-06 | 1,39E-03 |
| <i>PLEKHJ1</i>         | -1,24 | 7,56E-06 | 1,39E-03 |
| <i>OR2B2</i>           | 1,24  | 7,72E-06 | 1,39E-03 |
| <i>FEM1C</i>           | 1,32  | 7,67E-06 | 1,39E-03 |
| <i>FADD</i>            | -1,25 | 7,87E-06 | 1,40E-03 |
| <i>THC2263651</i>      | -1,32 | 8,04E-06 | 1,43E-03 |

|                     |       |          |          |
|---------------------|-------|----------|----------|
| <i>KIAA0701</i>     | 1,22  | 8,33E-06 | 1,47E-03 |
| <i>C16orf70</i>     | -1,16 | 8,66E-06 | 1,52E-03 |
| <i>2'-PDE</i>       | 1,24  | 8,89E-06 | 1,55E-03 |
| <i>OGG1</i>         | -1,20 | 9,00E-06 | 1,56E-03 |
| <i>NR4A3</i>        | 4,47  | 9,10E-06 | 1,57E-03 |
| <i>BC011455</i>     | -1,23 | 9,16E-06 | 1,57E-03 |
| <i>ZNF167</i>       | -1,46 | 9,29E-06 | 1,58E-03 |
| <i>ST6GALNAC5</i>   | 1,56  | 9,27E-06 | 1,58E-03 |
| <i>GLP2R</i>        | -1,97 | 9,57E-06 | 1,60E-03 |
| <i>MSX2</i>         | 1,50  | 9,56E-06 | 1,60E-03 |
| <i>ODF3L1</i>       | 1,67  | 9,48E-06 | 1,60E-03 |
| <i>A_24_P67552</i>  | 1,30  | 9,71E-06 | 1,61E-03 |
| <i>LEFTY2</i>       | -1,68 | 9,91E-06 | 1,62E-03 |
| <i>EPO</i>          | -1,68 | 1,00E-05 | 1,62E-03 |
| <i>ZNF177</i>       | -1,42 | 9,94E-06 | 1,62E-03 |
| <i>LOC90355</i>     | -1,38 | 1,00E-05 | 1,62E-03 |
| <i>RBM4B</i>        | -1,23 | 9,91E-06 | 1,62E-03 |
| <i>ZNF526</i>       | -1,34 | 1,02E-05 | 1,64E-03 |
| <i>ETAA16</i>       | -1,30 | 1,03E-05 | 1,64E-03 |
| <i>D4S234E</i>      | -1,72 | 1,05E-05 | 1,65E-03 |
| <i>ZNF419</i>       | -1,22 | 1,05E-05 | 1,65E-03 |
| <i>AARSL</i>        | -1,21 | 1,06E-05 | 1,65E-03 |
| <i>LOC221710</i>    | 1,23  | 1,06E-05 | 1,65E-03 |
| <i>SDC2</i>         | 1,46  | 1,04E-05 | 1,65E-03 |
| <i>AK126245</i>     | -1,40 | 1,07E-05 | 1,65E-03 |
| <i>AK026811</i>     | -1,39 | 1,07E-05 | 1,65E-03 |
| <i>FLJ11903</i>     | 1,61  | 1,08E-05 | 1,65E-03 |
| <i>STK17A</i>       | 1,37  | 1,09E-05 | 1,66E-03 |
| <i>CDKN2A</i>       | 1,44  | 1,11E-05 | 1,69E-03 |
| <i>AK124352</i>     | -1,77 | 1,14E-05 | 1,69E-03 |
| <i>AK095214</i>     | -1,43 | 1,16E-05 | 1,69E-03 |
| <i>C7orf38</i>      | -1,32 | 1,13E-05 | 1,69E-03 |
| <i>C10orf137</i>    | -1,26 | 1,15E-05 | 1,69E-03 |
| <i>KIF5B</i>        | 1,25  | 1,12E-05 | 1,69E-03 |
| <i>A_24_P726495</i> | 1,26  | 1,15E-05 | 1,69E-03 |
| <i>YPEL2</i>        | 1,30  | 1,15E-05 | 1,69E-03 |
| <i>DLC1</i>         | 1,65  | 1,15E-05 | 1,69E-03 |
| <i>THC2316976</i>   | -1,38 | 1,19E-05 | 1,73E-03 |
| <i>LOC554208</i>    | -1,42 | 1,20E-05 | 1,74E-03 |
| <i>AK023526</i>     | -1,55 | 1,28E-05 | 1,85E-03 |
| <i>X51602</i>       | -1,38 | 1,32E-05 | 1,90E-03 |
| <i>VPS37B</i>       | 1,30  | 1,33E-05 | 1,90E-03 |
| <i>RMI1</i>         | -1,41 | 1,35E-05 | 1,92E-03 |
| <i>ANKAR</i>        | -1,34 | 1,35E-05 | 1,92E-03 |

|                     |       |          |          |
|---------------------|-------|----------|----------|
| <i>KBTBD7</i>       | -1,40 | 1,36E-05 | 1,93E-03 |
| <i>BC037893</i>     | -1,29 | 1,40E-05 | 1,96E-03 |
| <i>RHOB</i>         | 1,56  | 1,42E-05 | 1,98E-03 |
| <i>SNAI1</i>        | 2,39  | 1,44E-05 | 2,01E-03 |
| <i>THC2406026</i>   | -1,26 | 1,48E-05 | 2,05E-03 |
| <i>ANK3</i>         | 1,62  | 1,49E-05 | 2,06E-03 |
| <i>THC2368568</i>   | -1,31 | 1,50E-05 | 2,07E-03 |
| <i>M96686</i>       | 2,02  | 1,51E-05 | 2,07E-03 |
| <i>ZNF133</i>       | -1,26 | 1,54E-05 | 2,08E-03 |
| <i>C1orf108</i>     | 1,31  | 1,53E-05 | 2,08E-03 |
| <i>CSDA</i>         | 1,45  | 1,54E-05 | 2,08E-03 |
| <i>SIRT4</i>        | -1,34 | 1,55E-05 | 2,09E-03 |
| <i>LOC286025</i>    | -1,29 | 1,57E-05 | 2,10E-03 |
| <i>ZNF202</i>       | -1,28 | 1,57E-05 | 2,10E-03 |
| <i>ZNF276</i>       | -1,20 | 1,58E-05 | 2,10E-03 |
| <i>AK022016</i>     | 1,35  | 1,59E-05 | 2,10E-03 |
| <i>PEX12</i>        | -1,41 | 1,61E-05 | 2,11E-03 |
| <i>FAM83D</i>       | 4,15  | 1,61E-05 | 2,11E-03 |
| <i>IGF2</i>         | -1,86 | 1,63E-05 | 2,13E-03 |
| <i>A_32_P106466</i> | 1,46  | 1,67E-05 | 2,17E-03 |
| <i>LMNA</i>         | 1,53  | 1,68E-05 | 2,17E-03 |
| <i>AI219192</i>     | 1,52  | 1,69E-05 | 2,18E-03 |
| <i>GPR155</i>       | 1,39  | 1,73E-05 | 2,22E-03 |
| <i>THC2378635</i>   | -1,46 | 1,77E-05 | 2,25E-03 |
| <i>DOC1</i>         | 1,77  | 1,77E-05 | 2,25E-03 |
| <i>MME</i>          | 2,36  | 1,83E-05 | 2,32E-03 |
| <i>AK125170</i>     | -1,29 | 1,86E-05 | 2,35E-03 |
| <i>DCUN1D2</i>      | -1,20 | 1,87E-05 | 2,35E-03 |
| <i>RND2</i>         | 1,42  | 1,91E-05 | 2,39E-03 |
| <i>AW444553</i>     | -1,71 | 1,99E-05 | 2,45E-03 |
| <i>LOC389072</i>    | -1,26 | 1,99E-05 | 2,45E-03 |
| <i>ZNF132</i>       | -1,25 | 1,97E-05 | 2,45E-03 |
| <i>THC2315555</i>   | 2,33  | 1,97E-05 | 2,45E-03 |
| <i>KLHL13</i>       | -1,60 | 2,06E-05 | 2,47E-03 |
| <i>BI771054</i>     | -1,58 | 2,14E-05 | 2,47E-03 |
| <i>THC2441641</i>   | -1,33 | 2,11E-05 | 2,47E-03 |
| <i>AK000144</i>     | -1,32 | 2,08E-05 | 2,47E-03 |
| <i>C3orf54</i>      | -1,31 | 2,13E-05 | 2,47E-03 |
| <i>THC2433060</i>   | -1,31 | 2,11E-05 | 2,47E-03 |
| <i>AF086442</i>     | -1,27 | 2,12E-05 | 2,47E-03 |
| <i>AX775927</i>     | -1,27 | 2,10E-05 | 2,47E-03 |
| <i>AL833832</i>     | -1,26 | 2,12E-05 | 2,47E-03 |
| <i>OR7E24</i>       | 1,21  | 2,13E-05 | 2,47E-03 |
| <i>C6orf145</i>     | 1,33  | 2,12E-05 | 2,47E-03 |

|                        |       |          |          |
|------------------------|-------|----------|----------|
| <i>RNF12</i>           | 1,33  | 2,06E-05 | 2,47E-03 |
| <i>CEBPG</i>           | 1,36  | 2,09E-05 | 2,47E-03 |
| <i>JDP2</i>            | 1,44  | 2,05E-05 | 2,47E-03 |
| <i>ENST00000284767</i> | 2,31  | 2,14E-05 | 2,47E-03 |
| <i>SIX1</i>            | 2,76  | 2,10E-05 | 2,47E-03 |
| <i>AXUD1</i>           | 3,85  | 2,10E-05 | 2,47E-03 |
| <i>ZADH2</i>           | -1,30 | 2,17E-05 | 2,50E-03 |
| <i>FLJ21369</i>        | -1,27 | 2,22E-05 | 2,55E-03 |
| <i>AK024516</i>        | -1,29 | 2,23E-05 | 2,55E-03 |
| <i>BI836739</i>        | -1,66 | 2,25E-05 | 2,57E-03 |
| <i>FLRT2</i>           | -1,32 | 2,27E-05 | 2,57E-03 |
| <i>C7orf23</i>         | -1,26 | 2,28E-05 | 2,57E-03 |
| <i>BCL7B</i>           | 1,16  | 2,28E-05 | 2,57E-03 |
| <i>THC2350023</i>      | -1,29 | 2,31E-05 | 2,57E-03 |
| <i>ZBTB33</i>          | -1,18 | 2,31E-05 | 2,57E-03 |
| <i>DDX25</i>           | 1,23  | 2,29E-05 | 2,57E-03 |
| <i>GPRC6A</i>          | 1,21  | 2,32E-05 | 2,58E-03 |
| <i>AK021798</i>        | -1,43 | 2,35E-05 | 2,59E-03 |
| <i>THC2439128</i>      | 1,29  | 2,37E-05 | 2,59E-03 |
| <i>THC2342574</i>      | 1,45  | 2,37E-05 | 2,59E-03 |
| <i>ANKRD37</i>         | 1,97  | 2,35E-05 | 2,59E-03 |
| <i>PLK3</i>            | 2,24  | 2,36E-05 | 2,59E-03 |
| <i>C11orf21</i>        | -1,37 | 2,40E-05 | 2,59E-03 |
| <i>STX1A</i>           | -1,30 | 2,40E-05 | 2,59E-03 |
| <i>THC2375635</i>      | -1,25 | 2,39E-05 | 2,59E-03 |
| <i>BMSC-MCP</i>        | 1,37  | 2,42E-05 | 2,60E-03 |
| <i>NBLA00301</i>       | -1,79 | 2,43E-05 | 2,61E-03 |
| <i>EFNB1</i>           | -1,37 | 2,48E-05 | 2,62E-03 |
| <i>LOC387787</i>       | -1,34 | 2,47E-05 | 2,62E-03 |
| <i>A_24_P368748</i>    | 1,24  | 2,48E-05 | 2,62E-03 |
| <i>MAFK</i>            | 1,47  | 2,46E-05 | 2,62E-03 |
| <i>LOC645277</i>       | -1,71 | 2,50E-05 | 2,62E-03 |
| <i>THC2453304</i>      | -1,40 | 2,50E-05 | 2,62E-03 |
| <i>MBTD1</i>           | -1,45 | 2,57E-05 | 2,64E-03 |
| <i>ZNF555</i>          | -1,38 | 2,58E-05 | 2,64E-03 |
| <i>A_32_P211048</i>    | -1,33 | 2,53E-05 | 2,64E-03 |
| <i>OXSM</i>            | -1,28 | 2,58E-05 | 2,64E-03 |
| <i>THC2407694</i>      | -1,17 | 2,58E-05 | 2,64E-03 |
| <i>RAB21</i>           | 1,23  | 2,58E-05 | 2,64E-03 |
| <i>CCND2</i>           | 1,29  | 2,57E-05 | 2,64E-03 |
| <i>ENST00000379969</i> | 1,45  | 2,55E-05 | 2,64E-03 |
| <i>ZNF416</i>          | -1,30 | 2,62E-05 | 2,67E-03 |
| <i>SWAP70</i>          | 1,25  | 2,64E-05 | 2,68E-03 |
| <i>AF242771</i>        | 1,14  | 2,67E-05 | 2,71E-03 |



|                     |       |          |          |
|---------------------|-------|----------|----------|
| <i>GRID1</i>        | -1,42 | 2,71E-05 | 2,71E-03 |
| <i>KBTBD6</i>       | -1,35 | 2,70E-05 | 2,71E-03 |
| <i>THC2371284</i>   | -1,32 | 2,71E-05 | 2,71E-03 |
| <i>ZNF558</i>       | -1,18 | 2,70E-05 | 2,71E-03 |
| <i>THC2378276</i>   | 1,30  | 2,72E-05 | 2,71E-03 |
| <i>AK093713</i>     | 1,28  | 2,75E-05 | 2,73E-03 |
| <i>THC2315602</i>   | -1,38 | 2,76E-05 | 2,73E-03 |
| <i>A_32_P99399</i>  | 1,31  | 2,78E-05 | 2,74E-03 |
| <i>AW946823</i>     | -1,53 | 2,85E-05 | 2,79E-03 |
| <i>BC044608</i>     | -1,25 | 2,84E-05 | 2,79E-03 |
| <i>THC2334551</i>   | -1,41 | 2,88E-05 | 2,81E-03 |
| <i>AK090416</i>     | -1,32 | 2,88E-05 | 2,81E-03 |
| <i>AK023892</i>     | 1,55  | 2,91E-05 | 2,82E-03 |
| <i>AMOTL1</i>       | 1,33  | 2,92E-05 | 2,82E-03 |
| <i>THC2350817</i>   | -1,47 | 2,96E-05 | 2,86E-03 |
| <i>BQ926066</i>     | -1,23 | 2,98E-05 | 2,86E-03 |
| <i>LPHN2</i>        | 1,31  | 2,98E-05 | 2,86E-03 |
| <i>AK090480</i>     | -1,61 | 3,06E-05 | 2,90E-03 |
| <i>P2RY5</i>        | -1,46 | 3,08E-05 | 2,90E-03 |
| <i>MGC10701</i>     | -1,37 | 3,04E-05 | 2,90E-03 |
| <i>BF446608</i>     | -1,33 | 3,07E-05 | 2,90E-03 |
| <i>THC2283783</i>   | -1,27 | 3,07E-05 | 2,90E-03 |
| <i>AREG</i>         | 3,19  | 3,06E-05 | 2,90E-03 |
| <i>A_32_P107797</i> | 1,25  | 3,11E-05 | 2,92E-03 |
| <i>AP4B1</i>        | -1,17 | 3,15E-05 | 2,95E-03 |
| <i>ZNF184</i>       | -1,27 | 3,16E-05 | 2,95E-03 |
| <i>AK001120</i>     | -1,31 | 3,17E-05 | 2,95E-03 |
| <i>MDK</i>          | -1,79 | 3,19E-05 | 2,96E-03 |
| <i>DNAJB4</i>       | 1,42  | 3,20E-05 | 2,96E-03 |
| <i>NEURL</i>        | -1,90 | 3,29E-05 | 2,98E-03 |
| <i>THC2283319</i>   | -1,67 | 3,27E-05 | 2,98E-03 |
| <i>WIT1</i>         | -1,58 | 3,28E-05 | 2,98E-03 |
| <i>SLC16A9</i>      | -1,34 | 3,24E-05 | 2,98E-03 |
| <i>FLJ21945</i>     | -1,30 | 3,29E-05 | 2,98E-03 |
| <i>CHST6</i>        | 1,49  | 3,29E-05 | 2,98E-03 |
| <i>BC024745</i>     | 2,05  | 3,29E-05 | 2,98E-03 |
| <i>THC2370211</i>   | -1,23 | 3,32E-05 | 3,00E-03 |
| <i>A_23_P208579</i> | -1,63 | 3,35E-05 | 3,02E-03 |
| <i>AK127572</i>     | -1,93 | 3,37E-05 | 3,02E-03 |
| <i>HAO1</i>         | 1,21  | 3,37E-05 | 3,02E-03 |
| <i>HECW1</i>        | 1,16  | 3,39E-05 | 3,02E-03 |
| <i>PCDH18</i>       | -1,46 | 3,44E-05 | 3,04E-03 |
| <i>THC2279910</i>   | -1,43 | 3,51E-05 | 3,04E-03 |
| <i>THC2447689</i>   | -1,43 | 3,51E-05 | 3,04E-03 |

|                        |       |          |          |
|------------------------|-------|----------|----------|
| <i>THC2295157</i>      | -1,40 | 3,43E-05 | 3,04E-03 |
| <i>MCMDC1</i>          | -1,35 | 3,48E-05 | 3,04E-03 |
| <i>ENST00000371497</i> | -1,26 | 3,50E-05 | 3,04E-03 |
| <i>CDC73</i>           | 1,13  | 3,46E-05 | 3,04E-03 |
| <i>GAS2L1</i>          | 1,18  | 3,52E-05 | 3,04E-03 |
| <i>THC2434618</i>      | 1,19  | 3,43E-05 | 3,04E-03 |
| <i>TA-NFKBH</i>        | 1,54  | 3,50E-05 | 3,04E-03 |
| <i>MGC14376</i>        | 1,84  | 3,52E-05 | 3,04E-03 |
| <i>MGC16385</i>        | -1,26 | 3,53E-05 | 3,05E-03 |
| <i>THC2315129</i>      | -1,40 | 3,56E-05 | 3,06E-03 |
| <i>SPIN3</i>           | -1,25 | 3,58E-05 | 3,06E-03 |
| <i>TWISTNB</i>         | 1,21  | 3,58E-05 | 3,06E-03 |
| <i>TNFRSF10D</i>       | 1,40  | 3,58E-05 | 3,06E-03 |
| <i>SLC19A2</i>         | 1,67  | 3,64E-05 | 3,10E-03 |
| <i>AK024147</i>        | -1,29 | 3,66E-05 | 3,11E-03 |
| <i>ZNF616</i>          | -1,22 | 3,72E-05 | 3,14E-03 |
| <i>CYFIP2</i>          | 1,59  | 3,72E-05 | 3,14E-03 |
| <i>AK095831</i>        | -1,39 | 3,79E-05 | 3,18E-03 |
| <i>ZNF214</i>          | -1,30 | 3,79E-05 | 3,18E-03 |
| <i>A_24_P533142</i>    | 1,23  | 3,81E-05 | 3,19E-03 |
| <i>DUSP10</i>          | 1,80  | 3,83E-05 | 3,20E-03 |
| <i>SCD5</i>            | 1,18  | 3,87E-05 | 3,22E-03 |
| <i>SNED1</i>           | -1,28 | 3,88E-05 | 3,23E-03 |
| <i>TRIM32</i>          | -1,23 | 3,91E-05 | 3,24E-03 |
| <i>DMTF1</i>           | -1,27 | 3,96E-05 | 3,27E-03 |
| <i>THC2303268</i>      | -1,52 | 3,98E-05 | 3,28E-03 |
| <i>CR610181</i>        | -1,73 | 4,00E-05 | 3,29E-03 |
| <i>BAG3</i>            | 1,50  | 4,04E-05 | 3,31E-03 |
| <i>ZNF564</i>          | -1,31 | 4,07E-05 | 3,33E-03 |
| <i>AK023774</i>        | -1,59 | 4,09E-05 | 3,33E-03 |
| <i>PARP16</i>          | -1,22 | 4,10E-05 | 3,33E-03 |
| <i>C9orf30</i>         | 1,24  | 4,11E-05 | 3,33E-03 |
| <i>A4GALT</i>          | 1,31  | 4,12E-05 | 3,33E-03 |
| <i>BC047753</i>        | -1,40 | 4,14E-05 | 3,34E-03 |
| <i>NAALAD2</i>         | -1,21 | 4,16E-05 | 3,35E-03 |
| <i>PWWP2</i>           | -1,23 | 4,19E-05 | 3,36E-03 |
| <i>C1orf176</i>        | -1,17 | 4,19E-05 | 3,36E-03 |
| <i>TSC22D4</i>         | -1,16 | 4,25E-05 | 3,38E-03 |
| <i>RDH10</i>           | 1,45  | 4,24E-05 | 3,38E-03 |
| <i>AK024956</i>        | -1,57 | 4,32E-05 | 3,43E-03 |
| <i>THC2282717</i>      | 1,29  | 4,33E-05 | 3,43E-03 |
| <i>ACTA1</i>           | 3,44  | 4,32E-05 | 3,43E-03 |
| <i>NAT2</i>            | -1,22 | 4,36E-05 | 3,44E-03 |
| <i>C14orf24</i>        | 1,30  | 4,37E-05 | 3,44E-03 |

|                        |       |          |          |
|------------------------|-------|----------|----------|
| <i>RP5-1022P6.2</i>    | 1,22  | 4,38E-05 | 3,44E-03 |
| <i>ZNF234</i>          | -1,28 | 4,41E-05 | 3,45E-03 |
| <i>ELOVL3</i>          | 1,25  | 4,44E-05 | 3,46E-03 |
| <i>ZC3H12A</i>         | 2,09  | 4,46E-05 | 3,47E-03 |
| <i>AK098491</i>        | -1,37 | 4,49E-05 | 3,49E-03 |
| <i>LARP2</i>           | 1,14  | 4,51E-05 | 3,49E-03 |
| <i>KIAA0907</i>        | -1,34 | 4,54E-05 | 3,51E-03 |
| <i>THC2283605</i>      | 1,38  | 4,61E-05 | 3,56E-03 |
| <i>CR749685</i>        | -1,23 | 4,65E-05 | 3,58E-03 |
| <i>THC2338716</i>      | -1,20 | 4,77E-05 | 3,66E-03 |
| <i>CPNE5</i>           | -1,63 | 4,81E-05 | 3,67E-03 |
| <i>FAM80B</i>          | 1,38  | 4,81E-05 | 3,67E-03 |
| <i>FANCF</i>           | -1,44 | 4,83E-05 | 3,68E-03 |
| <i>KLHL4</i>           | -1,28 | 4,84E-05 | 3,68E-03 |
| <i>ZNF14</i>           | -1,30 | 4,89E-05 | 3,69E-03 |
| <i>AHI1</i>            | 1,16  | 4,89E-05 | 3,69E-03 |
| <i>RNF122</i>          | 2,71  | 4,88E-05 | 3,69E-03 |
| <i>MAML2</i>           | 1,32  | 4,92E-05 | 3,70E-03 |
| <i>ENST00000377209</i> | 1,33  | 4,95E-05 | 3,71E-03 |
| <i>THC2280176</i>      | -1,23 | 5,05E-05 | 3,77E-03 |
| <i>BP290435</i>        | 1,27  | 5,06E-05 | 3,77E-03 |
| <i>APOLD1</i>          | 2,96  | 5,05E-05 | 3,77E-03 |
| <i>W60781</i>          | -1,86 | 5,09E-05 | 3,79E-03 |
| <i>AADAT</i>           | -1,25 | 5,14E-05 | 3,80E-03 |
| <i>SEDLP</i>           | 1,21  | 5,13E-05 | 3,80E-03 |
| <i>THC2435791</i>      | -1,51 | 5,30E-05 | 3,83E-03 |
| <i>HS3ST1</i>          | -1,49 | 5,27E-05 | 3,83E-03 |
| <i>BC041417</i>        | -1,31 | 5,24E-05 | 3,83E-03 |
| <i>L1CAM</i>           | 1,26  | 5,28E-05 | 3,83E-03 |
| <i>DDX3X</i>           | 1,28  | 5,27E-05 | 3,83E-03 |
| <i>BC041913</i>        | 1,32  | 5,30E-05 | 3,83E-03 |
| <i>IFRD1</i>           | 1,46  | 5,20E-05 | 3,83E-03 |
| <i>BDKRB2</i>          | 1,90  | 5,23E-05 | 3,83E-03 |
| <i>THBD</i>            | 2,11  | 5,30E-05 | 3,83E-03 |
| <i>SERTAD1</i>         | 2,37  | 5,24E-05 | 3,83E-03 |
| <i>MSI1</i>            | 1,18  | 5,34E-05 | 3,85E-03 |
| <i>CA414006</i>        | -1,35 | 5,37E-05 | 3,86E-03 |
| <i>UFM1</i>            | 1,22  | 5,38E-05 | 3,86E-03 |
| <i>ZNF599</i>          | -1,20 | 5,43E-05 | 3,89E-03 |
| <i>MSX2P</i>           | 1,60  | 5,48E-05 | 3,92E-03 |
| <i>LOC338799</i>       | -1,79 | 5,55E-05 | 3,93E-03 |
| <i>THC2274697</i>      | -1,46 | 5,56E-05 | 3,93E-03 |
| <i>PRPS2</i>           | -1,34 | 5,54E-05 | 3,93E-03 |
| <i>C1orf183</i>        | 1,22  | 5,54E-05 | 3,93E-03 |

|                        |       |          |          |
|------------------------|-------|----------|----------|
| <i>FRMD5</i>           | 1,27  | 5,60E-05 | 3,95E-03 |
| <i>A_23_P50195</i>     | -1,26 | 5,65E-05 | 3,98E-03 |
| <i>ABCG2</i>           | -1,35 | 5,67E-05 | 3,99E-03 |
| <i>KIAA1666</i>        | -1,44 | 5,80E-05 | 3,99E-03 |
| <i>FLJ40473</i>        | -1,34 | 5,77E-05 | 3,99E-03 |
| <i>ZNF500</i>          | -1,34 | 5,75E-05 | 3,99E-03 |
| <i>THC2264612</i>      | -1,24 | 5,80E-05 | 3,99E-03 |
| <i>COX19</i>           | -1,23 | 5,73E-05 | 3,99E-03 |
| <i>RBM5</i>            | -1,19 | 5,78E-05 | 3,99E-03 |
| <i>ARMC7</i>           | -1,19 | 5,81E-05 | 3,99E-03 |
| <i>YOD1</i>            | -1,15 | 5,84E-05 | 3,99E-03 |
| <i>KCNK2</i>           | 1,20  | 5,81E-05 | 3,99E-03 |
| <i>MYEF2</i>           | 1,26  | 5,82E-05 | 3,99E-03 |
| <i>KIAA0040</i>        | 1,38  | 5,72E-05 | 3,99E-03 |
| <i>TUBAL3</i>          | 2,27  | 5,83E-05 | 3,99E-03 |
| <i>SLC2A14</i>         | 2,69  | 5,83E-05 | 3,99E-03 |
| <i>A_24_P530690</i>    | 1,29  | 5,89E-05 | 4,01E-03 |
| <i>ZNF563</i>          | -1,20 | 5,94E-05 | 4,02E-03 |
| <i>OR7E47P</i>         | 1,34  | 5,93E-05 | 4,02E-03 |
| <i>MLC1</i>            | 1,76  | 5,92E-05 | 4,02E-03 |
| <i>THC2409283</i>      | 1,33  | 5,97E-05 | 4,03E-03 |
| <i>EPHB3</i>           | -1,51 | 6,03E-05 | 4,05E-03 |
| <i>THC2341617</i>      | -1,25 | 6,01E-05 | 4,05E-03 |
| <i>THC2266020</i>      | -1,17 | 6,03E-05 | 4,05E-03 |
| <i>ABHD10</i>          | -1,18 | 6,07E-05 | 4,06E-03 |
| <i>EMX2</i>            | -1,92 | 6,15E-05 | 4,08E-03 |
| <i>A_32_P30014</i>     | -1,42 | 6,14E-05 | 4,08E-03 |
| <i>AK025221</i>        | -1,37 | 6,15E-05 | 4,08E-03 |
| <i>ISLR</i>            | -1,30 | 6,16E-05 | 4,08E-03 |
| <i>PPP1R15B</i>        | 1,48  | 6,16E-05 | 4,08E-03 |
| <i>HUS1B</i>           | 1,23  | 6,34E-05 | 4,19E-03 |
| <i>ZNF212</i>          | -1,21 | 6,48E-05 | 4,27E-03 |
| <i>SVEP1</i>           | -1,57 | 6,68E-05 | 4,34E-03 |
| <i>ENST00000341533</i> | -1,37 | 6,67E-05 | 4,34E-03 |
| <i>BC032042</i>        | -1,29 | 6,68E-05 | 4,34E-03 |
| <i>ZNF91</i>           | -1,24 | 6,63E-05 | 4,34E-03 |
| <i>TRIM52</i>          | -1,21 | 6,70E-05 | 4,34E-03 |
| <i>ZBTB9</i>           | -1,18 | 6,64E-05 | 4,34E-03 |
| <i>RIPK2</i>           | 1,22  | 6,60E-05 | 4,34E-03 |
| <i>LOC161635</i>       | 1,32  | 6,69E-05 | 4,34E-03 |
| <i>FOSL2</i>           | 1,67  | 6,69E-05 | 4,34E-03 |
| <i>AK027393</i>        | -1,23 | 6,73E-05 | 4,34E-03 |
| <i>ZNF189</i>          | -1,12 | 6,73E-05 | 4,34E-03 |
| <i>A_32_P53976</i>     | -1,34 | 6,81E-05 | 4,36E-03 |

|                        |       |          |          |
|------------------------|-------|----------|----------|
| <i>AF085902</i>        | 1,25  | 6,79E-05 | 4,36E-03 |
| <i>SH3BP4</i>          | 1,31  | 6,80E-05 | 4,36E-03 |
| <i>THC2314346</i>      | 1,43  | 6,79E-05 | 4,36E-03 |
| <i>AK021848</i>        | -1,41 | 6,87E-05 | 4,37E-03 |
| <i>PIGA</i>            | 1,33  | 6,86E-05 | 4,37E-03 |
| <i>FMO2</i>            | -1,68 | 6,93E-05 | 4,40E-03 |
| <i>U66046</i>          | -1,33 | 6,94E-05 | 4,40E-03 |
| <i>CR608275</i>        | -1,28 | 6,96E-05 | 4,40E-03 |
| <i>AK021906</i>        | -1,25 | 7,01E-05 | 4,41E-03 |
| <i>SHRM</i>            | 1,94  | 7,00E-05 | 4,41E-03 |
| <i>SLN</i>             | 2,61  | 6,99E-05 | 4,41E-03 |
| <i>BC030118</i>        | -1,34 | 7,05E-05 | 4,41E-03 |
| <i>AK130431</i>        | -1,26 | 7,06E-05 | 4,41E-03 |
| <i>ZNF398</i>          | -1,19 | 7,04E-05 | 4,41E-03 |
| <i>TUB</i>             | -1,24 | 7,07E-05 | 4,41E-03 |
| <i>NHEJ1</i>           | -1,16 | 7,16E-05 | 4,46E-03 |
| <i>LOC91461</i>        | -1,30 | 7,21E-05 | 4,47E-03 |
| <i>CD58</i>            | 1,24  | 7,21E-05 | 4,47E-03 |
| <i>THC2317093</i>      | -1,47 | 7,29E-05 | 4,50E-03 |
| <i>USP12</i>           | 1,25  | 7,29E-05 | 4,50E-03 |
| <i>FAM107B</i>         | 1,49  | 7,34E-05 | 4,52E-03 |
| <i>ENST00000304105</i> | 1,18  | 7,41E-05 | 4,56E-03 |
| <i>THC2384975</i>      | -1,34 | 7,45E-05 | 4,57E-03 |
| <i>A_32_P58912</i>     | -1,49 | 7,48E-05 | 4,57E-03 |
| <i>ZBTB3</i>           | -1,29 | 7,47E-05 | 4,57E-03 |
| <i>FLJ22662</i>        | -1,27 | 7,66E-05 | 4,67E-03 |
| <i>ASB7</i>            | -1,20 | 7,66E-05 | 4,67E-03 |
| <i>EARS2</i>           | -1,32 | 7,73E-05 | 4,69E-03 |
| <i>PPAT</i>            | -1,16 | 7,73E-05 | 4,69E-03 |
| <i>FLJ32130</i>        | -1,32 | 7,78E-05 | 4,71E-03 |
| <i>SMPD3</i>           | -1,28 | 7,82E-05 | 4,73E-03 |
| <i>KLRG1</i>           | -1,34 | 7,86E-05 | 4,74E-03 |
| <i>LOC400960</i>       | -1,21 | 7,97E-05 | 4,80E-03 |
| <i>GPR22</i>           | -1,53 | 8,05E-05 | 4,81E-03 |
| <i>ATF7IP2</i>         | -1,21 | 8,01E-05 | 4,81E-03 |
| <i>THC2406792</i>      | 1,28  | 8,04E-05 | 4,81E-03 |
| <i>ID3</i>             | 1,35  | 8,04E-05 | 4,81E-03 |
| <i>LOC90835</i>        | -1,18 | 8,14E-05 | 4,86E-03 |
| <i>ENST00000330330</i> | -1,26 | 8,22E-05 | 4,89E-03 |
| <i>TMEM42</i>          | -1,25 | 8,29E-05 | 4,92E-03 |
| <i>NANOG</i>           | -1,44 | 8,34E-05 | 4,94E-03 |
| <i>TXNIP</i>           | -1,38 | 8,37E-05 | 4,95E-03 |
| <i>KIAA1383</i>        | -1,20 | 8,39E-05 | 4,95E-03 |
| <i>FZD4</i>            | -1,25 | 8,41E-05 | 4,96E-03 |

|                        |       |          |          |
|------------------------|-------|----------|----------|
| <i>SLC2A1</i>          | -1,71 | 8,45E-05 | 4,97E-03 |
| <i>THC2319766</i>      | -1,28 | 8,48E-05 | 4,98E-03 |
| <i>FOXA2</i>           | 1,22  | 8,49E-05 | 4,98E-03 |
| <i>CLK4</i>            | -1,32 | 8,55E-05 | 5,00E-03 |
| <i>TPM4</i>            | 1,34  | 8,60E-05 | 5,03E-03 |
| <i>TCP11L2</i>         | 1,42  | 8,66E-05 | 5,05E-03 |
| <i>LOC645032</i>       | -1,40 | 8,70E-05 | 5,06E-03 |
| <i>DIRC2</i>           | 1,18  | 8,71E-05 | 5,06E-03 |
| <i>AV753543</i>        | -1,37 | 8,75E-05 | 5,07E-03 |
| <i>SPAG9</i>           | 1,13  | 8,84E-05 | 5,12E-03 |
| <i>THC2373845</i>      | -1,27 | 8,88E-05 | 5,12E-03 |
| <i>ICAM1</i>           | 2,61  | 8,89E-05 | 5,12E-03 |
| <i>COMP</i>            | 3,53  | 8,98E-05 | 5,17E-03 |
| <i>ZNF691</i>          | -1,28 | 9,07E-05 | 5,19E-03 |
| <i>BM475547</i>        | -1,25 | 9,08E-05 | 5,19E-03 |
| <i>ZNF454</i>          | -1,22 | 9,07E-05 | 5,19E-03 |
| <i>THC2440580</i>      | -1,23 | 9,10E-05 | 5,20E-03 |
| <i>FIGNL1</i>          | -1,23 | 9,27E-05 | 5,29E-03 |
| <i>THC2386413</i>      | -1,26 | 9,41E-05 | 5,29E-03 |
| <i>THC2378994</i>      | -1,21 | 9,36E-05 | 5,29E-03 |
| <i>PJA1</i>            | -1,20 | 9,41E-05 | 5,29E-03 |
| <i>THC2311218</i>      | 1,22  | 9,37E-05 | 5,29E-03 |
| <i>C9orf150</i>        | 1,27  | 9,32E-05 | 5,29E-03 |
| <i>WWTR1</i>           | 1,36  | 9,34E-05 | 5,29E-03 |
| <i>CCDC19</i>          | 1,37  | 9,40E-05 | 5,29E-03 |
| <i>ENST00000229270</i> | 1,41  | 9,40E-05 | 5,29E-03 |
| <i>C1orf63</i>         | -1,24 | 9,45E-05 | 5,30E-03 |
| <i>PAFAH1B3</i>        | -1,27 | 9,50E-05 | 5,31E-03 |
| <i>THC2284174</i>      | -1,22 | 9,50E-05 | 5,31E-03 |
| <i>AK127194</i>        | -1,97 | 9,57E-05 | 5,34E-03 |
| <i>LOC439949</i>       | -1,38 | 9,64E-05 | 5,37E-03 |
| <i>FLJ13646</i>        | -1,29 | 9,71E-05 | 5,39E-03 |
| <i>ZNF439</i>          | -1,27 | 9,70E-05 | 5,39E-03 |
| <i>PLEKHF1</i>         | -1,22 | 9,75E-05 | 5,40E-03 |
| <i>TTMB</i>            | -1,26 | 9,87E-05 | 5,42E-03 |
| <i>SF3B3</i>           | -1,14 | 9,86E-05 | 5,42E-03 |
| <i>THC2438642</i>      | 1,19  | 9,86E-05 | 5,42E-03 |
| <i>AI669333</i>        | 1,34  | 9,83E-05 | 5,42E-03 |
| <i>ARID5B</i>          | 1,36  | 9,82E-05 | 5,42E-03 |
| <i>C17orf59</i>        | -1,20 | 9,90E-05 | 5,42E-03 |
| <i>AI915259</i>        | 1,24  | 9,89E-05 | 5,42E-03 |
| <i>CR590180</i>        | -1,24 | 9,94E-05 | 5,43E-03 |
| <i>SYNPO2</i>          | 1,65  | 9,97E-05 | 5,43E-03 |
| <i>C20orf94</i>        | 1,32  | 9,99E-05 | 5,44E-03 |

|                        |       |          |          |
|------------------------|-------|----------|----------|
| <i>AK130741</i>        | -1,30 | 1,01E-04 | 5,45E-03 |
| <i>NANOS3</i>          | 1,27  | 1,00E-04 | 5,45E-03 |
| <i>AI301106</i>        | -1,24 | 1,02E-04 | 5,52E-03 |
| <i>ALDH9A1</i>         | -1,19 | 1,02E-04 | 5,52E-03 |
| <i>CMKOR1</i>          | 1,69  | 1,02E-04 | 5,53E-03 |
| <i>THC2263973</i>      | -1,56 | 1,03E-04 | 5,53E-03 |
| <i>A_32_P79515</i>     | -1,30 | 1,03E-04 | 5,54E-03 |
| <i>ZNF193</i>          | -1,22 | 1,03E-04 | 5,54E-03 |
| <i>BC038432</i>        | 1,27  | 1,03E-04 | 5,54E-03 |
| <i>FLJ42953</i>        | 1,18  | 1,04E-04 | 5,54E-03 |
| <i>CDKN2B</i>          | 1,34  | 1,04E-04 | 5,54E-03 |
| <i>L3MBTL</i>          | -1,23 | 1,04E-04 | 5,56E-03 |
| <i>C1orf55</i>         | 1,27  | 1,05E-04 | 5,58E-03 |
| <i>BX105152</i>        | -1,48 | 1,06E-04 | 5,62E-03 |
| <i>THC2415708</i>      | -1,25 | 1,06E-04 | 5,62E-03 |
| <i>EED</i>             | -1,21 | 1,06E-04 | 5,62E-03 |
| <i>THC2441058</i>      | 1,83  | 1,06E-04 | 5,62E-03 |
| <i>SPATA5L1</i>        | -1,19 | 1,07E-04 | 5,64E-03 |
| <i>A_32_P176200</i>    | 1,47  | 1,07E-04 | 5,64E-03 |
| <i>ENST00000322032</i> | -3,54 | 1,09E-04 | 5,72E-03 |
| <i>THC2375588</i>      | -1,36 | 1,10E-04 | 5,72E-03 |
| <i>FRAT2</i>           | -1,31 | 1,10E-04 | 5,72E-03 |
| <i>AK021595</i>        | -1,29 | 1,09E-04 | 5,72E-03 |
| <i>FAM102A</i>         | -1,26 | 1,09E-04 | 5,72E-03 |
| <i>BG114486</i>        | -1,25 | 1,10E-04 | 5,72E-03 |
| <i>BC069659</i>        | -1,23 | 1,10E-04 | 5,72E-03 |
| <i>NSUN5</i>           | -1,19 | 1,10E-04 | 5,72E-03 |
| <i>TIGD6</i>           | -1,18 | 1,09E-04 | 5,72E-03 |
| <i>LOC399851</i>       | 1,21  | 1,10E-04 | 5,72E-03 |
| <i>A_24_P922893</i>    | -1,28 | 1,11E-04 | 5,73E-03 |
| <i>AK098478</i>        | 1,38  | 1,11E-04 | 5,73E-03 |
| <i>ID4</i>             | 1,45  | 1,11E-04 | 5,73E-03 |
| <i>THC2280638</i>      | -1,41 | 1,11E-04 | 5,73E-03 |
| <i>A_32_P89277</i>     | -1,25 | 1,12E-04 | 5,76E-03 |
| <i>A_24_P934861</i>    | -1,19 | 1,12E-04 | 5,76E-03 |
| <i>AK022407</i>        | -1,30 | 1,13E-04 | 5,76E-03 |
| <i>ZNF573</i>          | -1,24 | 1,13E-04 | 5,78E-03 |
| <i>PLK1</i>            | -1,20 | 1,14E-04 | 5,80E-03 |
| <i>C17orf42</i>        | -1,18 | 1,14E-04 | 5,81E-03 |
| <i>A_23_P39746</i>     | -1,43 | 1,14E-04 | 5,82E-03 |
| <i>AK057196</i>        | -1,50 | 1,15E-04 | 5,84E-03 |
| <i>CN430296</i>        | -1,29 | 1,16E-04 | 5,86E-03 |
| <i>ITFG2</i>           | -1,19 | 1,16E-04 | 5,86E-03 |
| <i>DCLRE1C</i>         | -1,18 | 1,16E-04 | 5,86E-03 |

|                        |       |          |          |
|------------------------|-------|----------|----------|
| <i>LRP1B</i>           | 1,55  | 1,16E-04 | 5,86E-03 |
| <i>AW204925</i>        | 1,25  | 1,16E-04 | 5,86E-03 |
| <i>TNNT3</i>           | -1,43 | 1,18E-04 | 5,87E-03 |
| <i>CB250445</i>        | -1,38 | 1,18E-04 | 5,87E-03 |
| <i>THC2400714</i>      | -1,21 | 1,18E-04 | 5,87E-03 |
| <i>BC012036</i>        | -1,15 | 1,18E-04 | 5,87E-03 |
| <i>USP13</i>           | 1,24  | 1,18E-04 | 5,87E-03 |
| <i>THC2381061</i>      | 1,89  | 1,17E-04 | 5,87E-03 |
| <i>ZNF594</i>          | -1,32 | 1,18E-04 | 5,89E-03 |
| <i>ZNF449</i>          | -1,22 | 1,18E-04 | 5,89E-03 |
| <i>A_32_P179807</i>    | -1,27 | 1,19E-04 | 5,89E-03 |
| <i>PLXNA2</i>          | 1,31  | 1,19E-04 | 5,89E-03 |
| <i>TRAF3IP3</i>        | -1,43 | 1,20E-04 | 5,93E-03 |
| <i>LOC645427</i>       | -1,27 | 1,21E-04 | 5,95E-03 |
| <i>ZBTB8</i>           | -1,16 | 1,21E-04 | 5,95E-03 |
| <i>SOX4</i>            | -1,33 | 1,22E-04 | 5,97E-03 |
| <i>DA438590</i>        | 1,23  | 1,22E-04 | 5,97E-03 |
| <i>A_24_P110601</i>    | 1,38  | 1,21E-04 | 5,97E-03 |
| <i>RALGDS</i>          | 1,63  | 1,22E-04 | 5,97E-03 |
| <i>ZNF572</i>          | -1,36 | 1,23E-04 | 6,03E-03 |
| <i>BE839843</i>        | 1,53  | 1,24E-04 | 6,03E-03 |
| <i>CREB5</i>           | 1,59  | 1,23E-04 | 6,03E-03 |
| <i>CA843452</i>        | 1,20  | 1,24E-04 | 6,04E-03 |
| <i>BX490547</i>        | -1,27 | 1,24E-04 | 6,05E-03 |
| <i>CR603450</i>        | -1,25 | 1,25E-04 | 6,05E-03 |
| <i>BE165955</i>        | -1,18 | 1,25E-04 | 6,05E-03 |
| <i>RBP5</i>            | -1,36 | 1,27E-04 | 6,11E-03 |
| <i>ZNF490</i>          | -1,24 | 1,27E-04 | 6,11E-03 |
| <i>IL6</i>             | 6,55  | 1,27E-04 | 6,11E-03 |
| <i>MGC16121</i>        | -2,20 | 1,30E-04 | 6,13E-03 |
| <i>AI207522</i>        | -1,61 | 1,28E-04 | 6,13E-03 |
| <i>AF143879</i>        | -1,47 | 1,29E-04 | 6,13E-03 |
| <i>AK022479</i>        | -1,35 | 1,29E-04 | 6,13E-03 |
| <i>THC2365025</i>      | -1,33 | 1,29E-04 | 6,13E-03 |
| <i>ARL4A</i>           | -1,33 | 1,30E-04 | 6,13E-03 |
| <i>ENST00000263511</i> | -1,29 | 1,27E-04 | 6,13E-03 |
| <i>CCDC8</i>           | -1,26 | 1,29E-04 | 6,13E-03 |
| <i>BC000845</i>        | 1,25  | 1,28E-04 | 6,13E-03 |
| <i>THC2400529</i>      | 1,38  | 1,29E-04 | 6,13E-03 |
| <i>BMP8B</i>           | 1,48  | 1,28E-04 | 6,13E-03 |
| <i>KRTAP6-3</i>        | 1,58  | 1,29E-04 | 6,13E-03 |
| <i>AK130878</i>        | 1,60  | 1,29E-04 | 6,13E-03 |
| <i>ENST00000339446</i> | 2,37  | 1,29E-04 | 6,13E-03 |
| <i>ENST00000326881</i> | -1,20 | 1,30E-04 | 6,13E-03 |



|                        |       |          |          |
|------------------------|-------|----------|----------|
| <i>A_23_P202034</i>    | 1,12  | 1,30E-04 | 6,13E-03 |
| <i>FZD10</i>           | 1,72  | 1,31E-04 | 6,13E-03 |
| <i>EPS8L1</i>          | -1,37 | 1,32E-04 | 6,17E-03 |
| <i>AK092134</i>        | 1,21  | 1,32E-04 | 6,17E-03 |
| <i>ZFP62</i>           | -1,29 | 1,32E-04 | 6,18E-03 |
| <i>ENTPD1</i>          | 1,31  | 1,32E-04 | 6,18E-03 |
| <i>ZNF18</i>           | -1,18 | 1,33E-04 | 6,21E-03 |
| <i>ENST00000355247</i> | -1,26 | 1,35E-04 | 6,25E-03 |
| <i>TTC9C</i>           | -1,22 | 1,35E-04 | 6,25E-03 |
| <i>AF119871</i>        | -1,20 | 1,34E-04 | 6,25E-03 |
| <i>BE540788</i>        | 1,25  | 1,35E-04 | 6,25E-03 |
| <i>CASKIN2</i>         | 1,28  | 1,35E-04 | 6,27E-03 |
| <i>FAM107A</i>         | 1,58  | 1,36E-04 | 6,28E-03 |
| <i>JMJD1C</i>          | 1,27  | 1,36E-04 | 6,29E-03 |
| <i>CORIN</i>           | 1,61  | 1,36E-04 | 6,29E-03 |
| <i>AA642112</i>        | -1,26 | 1,38E-04 | 6,35E-03 |
| <i>C1orf71</i>         | 1,35  | 1,38E-04 | 6,35E-03 |
| <i>MGC23270</i>        | -1,12 | 1,39E-04 | 6,38E-03 |
| <i>A_23_P2032</i>      | -1,38 | 1,39E-04 | 6,38E-03 |
| <i>DRCTNNB1A</i>       | 1,13  | 1,40E-04 | 6,39E-03 |
| <i>THC2274685</i>      | -1,33 | 1,41E-04 | 6,45E-03 |
| <i>A_24_P915326</i>    | -1,33 | 1,42E-04 | 6,45E-03 |
| <i>ARHGAP18</i>        | -1,33 | 1,42E-04 | 6,45E-03 |
| <i>ZNF284</i>          | -1,25 | 1,43E-04 | 6,45E-03 |
| <i>RCBTB2</i>          | -1,19 | 1,42E-04 | 6,45E-03 |
| <i>DCAKD</i>           | -1,17 | 1,42E-04 | 6,45E-03 |
| <i>ITGA7</i>           | 1,50  | 1,42E-04 | 6,45E-03 |
| <i>BF514513</i>        | 1,51  | 1,42E-04 | 6,45E-03 |
| <i>SRGAP1</i>          | -1,22 | 1,44E-04 | 6,47E-03 |
| <i>A_24_P247205</i>    | 1,40  | 1,44E-04 | 6,47E-03 |
| <i>ENST00000328681</i> | -1,35 | 1,44E-04 | 6,49E-03 |
| <i>LOC400684</i>       | -1,25 | 1,45E-04 | 6,49E-03 |
| <i>PEX11B</i>          | -1,24 | 1,44E-04 | 6,49E-03 |
| <i>XRCC4</i>           | 1,14  | 1,45E-04 | 6,50E-03 |
| <i>ZNF667</i>          | -1,25 | 1,45E-04 | 6,50E-03 |
| <i>AF086536</i>        | -1,26 | 1,46E-04 | 6,52E-03 |
| <i>NAPG</i>            | 1,18  | 1,46E-04 | 6,52E-03 |
| <i>AK022183</i>        | -1,31 | 1,47E-04 | 6,54E-03 |
| <i>AK025323</i>        | -1,19 | 1,47E-04 | 6,54E-03 |
| <i>THC2458496</i>      | -1,41 | 1,47E-04 | 6,54E-03 |
| <i>ENST00000368847</i> | -1,26 | 1,48E-04 | 6,54E-03 |
| <i>CPXM2</i>           | 1,46  | 1,48E-04 | 6,54E-03 |
| <i>ENST00000341191</i> | -1,23 | 1,48E-04 | 6,55E-03 |
| <i>MAGEA6</i>          | 1,37  | 1,48E-04 | 6,55E-03 |

|                        |       |          |          |
|------------------------|-------|----------|----------|
| <i>AL831885</i>        | -1,32 | 1,49E-04 | 6,56E-03 |
| <i>PRICKLE2</i>        | -1,26 | 1,49E-04 | 6,56E-03 |
| <i>THC2282416</i>      | -1,24 | 1,49E-04 | 6,56E-03 |
| <i>PEA15</i>           | 1,18  | 1,49E-04 | 6,56E-03 |
| <i>THC2313538</i>      | -1,29 | 1,50E-04 | 6,57E-03 |
| <i>KIAA1018</i>        | -1,22 | 1,50E-04 | 6,58E-03 |
| <i>ENST00000357283</i> | -1,22 | 1,51E-04 | 6,60E-03 |
| <i>SERPINB8</i>        | 1,44  | 1,51E-04 | 6,62E-03 |
| <i>LOC150759</i>       | -1,22 | 1,52E-04 | 6,63E-03 |
| <i>AK027294</i>        | -1,50 | 1,52E-04 | 6,63E-03 |
| <i>RTP4</i>            | -1,30 | 1,52E-04 | 6,63E-03 |
| <i>THC2300570</i>      | -1,16 | 1,53E-04 | 6,64E-03 |
| <i>C8orf44</i>         | -1,24 | 1,54E-04 | 6,66E-03 |
| <i>THC2284058</i>      | -2,03 | 1,54E-04 | 6,69E-03 |
| <i>CECR6</i>           | -1,30 | 1,55E-04 | 6,69E-03 |
| <i>THC2406532</i>      | -1,29 | 1,55E-04 | 6,69E-03 |
| <i>MGC35295</i>        | 1,21  | 1,55E-04 | 6,69E-03 |
| <i>FSTL3</i>           | 1,37  | 1,55E-04 | 6,69E-03 |
| <i>A_32_P599</i>       | 1,44  | 1,55E-04 | 6,69E-03 |
| <i>GOLPH3L</i>         | -1,12 | 1,57E-04 | 6,74E-03 |
| <i>LMO3</i>            | -1,58 | 1,57E-04 | 6,74E-03 |
| <i>ANKFY1</i>          | -1,22 | 1,58E-04 | 6,74E-03 |
| <i>XKR8</i>            | -1,22 | 1,58E-04 | 6,74E-03 |
| <i>USP49</i>           | -1,15 | 1,57E-04 | 6,74E-03 |
| <i>SKIL</i>            | 1,43  | 1,58E-04 | 6,74E-03 |
| <i>TRO</i>             | -1,32 | 1,59E-04 | 6,74E-03 |
| <i>AK021463</i>        | -1,23 | 1,59E-04 | 6,74E-03 |
| <i>RFP2</i>            | -1,15 | 1,58E-04 | 6,74E-03 |
| <i>N90434</i>          | 1,30  | 1,59E-04 | 6,74E-03 |
| <i>ITGB3</i>           | 1,51  | 1,59E-04 | 6,74E-03 |
| <i>SLK</i>             | 1,15  | 1,61E-04 | 6,79E-03 |
| <i>KLK15</i>           | 1,25  | 1,61E-04 | 6,79E-03 |
| <i>FAM19A5</i>         | -1,52 | 1,62E-04 | 6,80E-03 |
| <i>WDR5B</i>           | -1,28 | 1,61E-04 | 6,80E-03 |
| <i>THC2378571</i>      | -1,23 | 1,62E-04 | 6,80E-03 |
| <i>TBC1D9B</i>         | -1,11 | 1,62E-04 | 6,80E-03 |
| <i>ITGA1</i>           | 1,46  | 1,62E-04 | 6,80E-03 |
| <i>C1orf186</i>        | -1,73 | 1,63E-04 | 6,82E-03 |
| <i>THC2441761</i>      | -1,45 | 1,63E-04 | 6,84E-03 |
| <i>A_23_P57836</i>     | 2,16  | 1,63E-04 | 6,84E-03 |
| <i>CHMP1B</i>          | 1,24  | 1,64E-04 | 6,84E-03 |
| <i>MGC10993</i>        | -1,46 | 1,65E-04 | 6,86E-03 |
| <i>THC2341892</i>      | -1,22 | 1,65E-04 | 6,86E-03 |
| <i>LOC440839</i>       | -1,20 | 1,65E-04 | 6,87E-03 |

|              |       |          |          |
|--------------|-------|----------|----------|
| ALCAM        | 1,43  | 1,65E-04 | 6,87E-03 |
| A_32_P176790 | -1,29 | 1,69E-04 | 6,92E-03 |
| PTHR1        | -1,25 | 1,68E-04 | 6,92E-03 |
| ZRANB2       | -1,23 | 1,68E-04 | 6,92E-03 |
| LOC643641    | -1,18 | 1,68E-04 | 6,92E-03 |
| BF689038     | 1,22  | 1,68E-04 | 6,92E-03 |
| PRKAG2       | 1,29  | 1,67E-04 | 6,92E-03 |
| DUSP14       | 1,58  | 1,68E-04 | 6,92E-03 |
| KLF10        | 1,59  | 1,67E-04 | 6,92E-03 |
| CSPG2        | 1,72  | 1,69E-04 | 6,92E-03 |
| ATF3         | 5,05  | 1,69E-04 | 6,94E-03 |
| DCP2         | -1,19 | 1,71E-04 | 6,98E-03 |
| HSPC159      | 1,39  | 1,71E-04 | 6,98E-03 |
| THC2404993   | -1,51 | 1,72E-04 | 6,98E-03 |
| IDH1         | -1,28 | 1,71E-04 | 6,98E-03 |
| ARMCX2       | -1,25 | 1,71E-04 | 6,98E-03 |
| BC021677     | -1,25 | 1,72E-04 | 6,98E-03 |
| CDV3         | 1,20  | 1,72E-04 | 6,98E-03 |
| BTN3A1       | -1,20 | 1,72E-04 | 6,98E-03 |
| ADAMTS1      | 2,21  | 1,72E-04 | 6,98E-03 |
| GIMAP8       | -1,40 | 1,73E-04 | 6,99E-03 |
| ZNF307       | -1,20 | 1,73E-04 | 6,99E-03 |
| FUT1         | 1,31  | 1,73E-04 | 7,00E-03 |
| FLJ39653     | -1,27 | 1,74E-04 | 7,01E-03 |
| AKR1C1       | 1,55  | 1,74E-04 | 7,01E-03 |
| PYY2         | 1,43  | 1,75E-04 | 7,02E-03 |
| NSUN5C       | -1,25 | 1,75E-04 | 7,03E-03 |
| FLJ30277     | -1,22 | 1,76E-04 | 7,04E-03 |
| SILV         | -2,91 | 1,77E-04 | 7,08E-03 |
| PRPF39       | -1,23 | 1,77E-04 | 7,08E-03 |
| ANKRD49      | -1,19 | 1,77E-04 | 7,08E-03 |
| TGFBR1       | 1,41  | 1,79E-04 | 7,13E-03 |
| TGDS         | -1,26 | 1,79E-04 | 7,13E-03 |
| ZNF79        | -1,22 | 1,79E-04 | 7,14E-03 |
| HAGH         | 1,20  | 1,80E-04 | 7,14E-03 |
| BX104982     | 1,28  | 1,80E-04 | 7,16E-03 |
| SPATA13      | 1,33  | 1,82E-04 | 7,21E-03 |
| SEMA5B       | 1,40  | 1,82E-04 | 7,22E-03 |
| CUZD1        | -1,27 | 1,83E-04 | 7,23E-03 |
| THC2431711   | 1,17  | 1,83E-04 | 7,23E-03 |
| ARHGAP10     | 1,36  | 1,83E-04 | 7,23E-03 |
| ATP2A3       | 1,35  | 1,84E-04 | 7,24E-03 |
| THC2317006   | -1,35 | 1,84E-04 | 7,24E-03 |
| ZSWIM3       | -1,28 | 1,84E-04 | 7,25E-03 |

|                        |       |          |          |
|------------------------|-------|----------|----------|
| <i>LOC90693</i>        | 1,13  | 1,85E-04 | 7,26E-03 |
| <i>FLJ20160</i>        | 1,29  | 1,85E-04 | 7,26E-03 |
| <i>CSF3</i>            | 4,05  | 1,85E-04 | 7,26E-03 |
| <i>WDR75</i>           | -1,14 | 1,86E-04 | 7,28E-03 |
| <i>ALKBH4</i>          | -1,22 | 1,87E-04 | 7,29E-03 |
| <i>RFP</i>             | -1,16 | 1,87E-04 | 7,29E-03 |
| <i>KLHL9</i>           | -1,21 | 1,88E-04 | 7,31E-03 |
| <i>ZNF514</i>          | -1,26 | 1,88E-04 | 7,32E-03 |
| <i>GM632</i>           | -1,17 | 1,88E-04 | 7,32E-03 |
| <i>A_23_P320728</i>    | -1,28 | 1,89E-04 | 7,35E-03 |
| <i>THC2378508</i>      | -1,32 | 1,90E-04 | 7,35E-03 |
| <i>AK054562</i>        | -1,14 | 1,90E-04 | 7,35E-03 |
| <i>AK056630</i>        | -1,17 | 1,91E-04 | 7,36E-03 |
| <i>ZNF96</i>           | -1,16 | 1,91E-04 | 7,36E-03 |
| <i>ISG20L1</i>         | 1,26  | 1,91E-04 | 7,36E-03 |
| <i>C14orf62</i>        | -1,25 | 1,91E-04 | 7,37E-03 |
| <i>PVR</i>             | 1,24  | 1,92E-04 | 7,38E-03 |
| <i>38961</i>           | -1,30 | 1,93E-04 | 7,38E-03 |
| <i>ZNF215</i>          | -1,28 | 1,93E-04 | 7,38E-03 |
| <i>HPS6</i>            | -1,23 | 1,93E-04 | 7,38E-03 |
| <i>CDAN1</i>           | -1,15 | 1,93E-04 | 7,38E-03 |
| <i>DIO3OS</i>          | -1,40 | 1,93E-04 | 7,38E-03 |
| <i>BX648855</i>        | -1,24 | 1,94E-04 | 7,38E-03 |
| <i>GADD45B</i>         | 3,58  | 1,94E-04 | 7,38E-03 |
| <i>A_32_P32463</i>     | 1,23  | 1,95E-04 | 7,42E-03 |
| <i>A_24_P931939</i>    | -1,26 | 1,95E-04 | 7,43E-03 |
| <i>ZNF571</i>          | -1,23 | 1,96E-04 | 7,43E-03 |
| <i>THC2272172</i>      | -1,36 | 1,96E-04 | 7,44E-03 |
| <i>KLF7</i>            | 1,34  | 1,97E-04 | 7,46E-03 |
| <i>BC041459</i>        | -1,31 | 1,98E-04 | 7,48E-03 |
| <i>THC2390143</i>      | -1,45 | 1,99E-04 | 7,49E-03 |
| <i>ZNFN1A1</i>         | -1,22 | 1,98E-04 | 7,49E-03 |
| <i>SYT3</i>            | 1,24  | 1,98E-04 | 7,49E-03 |
| <i>ENST00000305752</i> | -1,16 | 1,99E-04 | 7,51E-03 |
| <i>CHRN1</i>           | -1,16 | 2,00E-04 | 7,51E-03 |
| <i>A_32_P8371</i>      | -1,37 | 2,01E-04 | 7,53E-03 |
| <i>A_32_P6452</i>      | -1,37 | 2,01E-04 | 7,53E-03 |
| <i>AL110130</i>        | -1,36 | 2,02E-04 | 7,53E-03 |
| <i>ZNF587</i>          | -1,21 | 2,01E-04 | 7,53E-03 |
| <i>FOXL1</i>           | 1,28  | 2,01E-04 | 7,53E-03 |
| <i>ENST00000326470</i> | 1,32  | 2,01E-04 | 7,53E-03 |
| <i>SSTR2</i>           | 1,94  | 2,02E-04 | 7,54E-03 |
| <i>AL359596</i>        | -1,27 | 2,03E-04 | 7,57E-03 |
| <i>RBM12B</i>          | -1,23 | 2,03E-04 | 7,57E-03 |

|                        |       |          |          |
|------------------------|-------|----------|----------|
| <i>A_32_P10557</i>     | -1,11 | 2,06E-04 | 7,67E-03 |
| <i>AF320072</i>        | 1,23  | 2,06E-04 | 7,67E-03 |
| <i>SIX3</i>            | 1,33  | 2,07E-04 | 7,68E-03 |
| <i>SPHK1</i>           | 1,44  | 2,08E-04 | 7,69E-03 |
| <i>AK021668</i>        | -1,36 | 2,08E-04 | 7,69E-03 |
| <i>PVRL2</i>           | 1,32  | 2,08E-04 | 7,69E-03 |
| <i>A_32_P80523</i>     | -1,46 | 2,09E-04 | 7,71E-03 |
| <i>AY029066</i>        | 1,25  | 2,09E-04 | 7,71E-03 |
| <i>AK022430</i>        | -1,40 | 2,10E-04 | 7,72E-03 |
| <i>A_24_P513764</i>    | 1,25  | 2,10E-04 | 7,73E-03 |
| <i>ENST00000299289</i> | -1,38 | 2,11E-04 | 7,74E-03 |
| <i>WDR81</i>           | -1,17 | 2,11E-04 | 7,74E-03 |
| <i>ATF7</i>            | 1,16  | 2,11E-04 | 7,74E-03 |
| <i>CR606969</i>        | -1,30 | 2,12E-04 | 7,76E-03 |
| <i>A_32_P110086</i>    | -1,31 | 2,13E-04 | 7,78E-03 |
| <i>THC2376198</i>      | -1,34 | 2,14E-04 | 7,81E-03 |
| <i>ENST00000259219</i> | -2,78 | 2,15E-04 | 7,83E-03 |
| <i>C8ORFK32</i>        | 1,22  | 2,15E-04 | 7,83E-03 |
| <i>THC2331610</i>      | 1,39  | 2,15E-04 | 7,83E-03 |
| <i>SOD2</i>            | 1,60  | 2,16E-04 | 7,83E-03 |
| <i>GDF10</i>           | -1,67 | 2,17E-04 | 7,86E-03 |
| <i>BX647614</i>        | -1,34 | 2,18E-04 | 7,86E-03 |
| <i>ENST00000301042</i> | -1,15 | 2,18E-04 | 7,86E-03 |
| <i>KLF11</i>           | 1,24  | 2,18E-04 | 7,86E-03 |
| <i>CR595983</i>        | 1,31  | 2,18E-04 | 7,86E-03 |
| <i>PPARGC1A</i>        | 1,44  | 2,18E-04 | 7,86E-03 |
| <i>GPRC5A</i>          | 1,84  | 2,18E-04 | 7,86E-03 |
| <i>FLJ45187</i>        | -1,43 | 2,19E-04 | 7,86E-03 |
| <i>HOXA10</i>          | -1,33 | 2,19E-04 | 7,86E-03 |
| <i>FLJ12716</i>        | -1,17 | 2,19E-04 | 7,86E-03 |
| <i>BE646426</i>        | 1,28  | 2,19E-04 | 7,86E-03 |
| <i>PPP1R9A</i>         | 1,34  | 2,19E-04 | 7,86E-03 |
| <i>SYVN1</i>           | -1,15 | 2,20E-04 | 7,88E-03 |
| <i>ENST00000341154</i> | -1,18 | 2,21E-04 | 7,89E-03 |
| <i>CCDC76</i>          | -1,24 | 2,21E-04 | 7,90E-03 |
| <i>NR4A2</i>           | 2,73  | 2,21E-04 | 7,90E-03 |
| <i>DSCR1L2</i>         | 1,32  | 2,22E-04 | 7,90E-03 |
| <i>DFNB59</i>          | -1,26 | 2,23E-04 | 7,92E-03 |
| <i>ZC3HAV1L</i>        | -1,17 | 2,23E-04 | 7,92E-03 |
| <i>THC2319755</i>      | 1,51  | 2,23E-04 | 7,92E-03 |
| <i>BRF2</i>            | -1,35 | 2,25E-04 | 7,98E-03 |
| <i>CROP</i>            | -1,20 | 2,26E-04 | 7,98E-03 |
| <i>LOC646561</i>       | 1,18  | 2,26E-04 | 7,98E-03 |
| <i>CA419778</i>        | 1,24  | 2,26E-04 | 7,98E-03 |

|                        |       |          |          |
|------------------------|-------|----------|----------|
| <i>A_24_P753760</i>    | 1,32  | 2,26E-04 | 7,98E-03 |
| <i>CYSLTR2</i>         | 1,33  | 2,26E-04 | 7,98E-03 |
| <i>ENST00000366930</i> | 1,47  | 2,26E-04 | 7,98E-03 |
| <i>HARSL</i>           | -1,19 | 2,27E-04 | 7,99E-03 |
| <i>ZNF223</i>          | -1,17 | 2,27E-04 | 7,99E-03 |
| <i>THC2308876</i>      | -1,53 | 2,30E-04 | 8,02E-03 |
| <i>ENST00000238789</i> | -1,20 | 2,30E-04 | 8,02E-03 |
| <i>ACYP1</i>           | -1,19 | 2,30E-04 | 8,02E-03 |
| <i>CECR1</i>           | 1,20  | 2,29E-04 | 8,02E-03 |
| <i>THC2378689</i>      | 1,34  | 2,29E-04 | 8,02E-03 |
| <i>DYRK3</i>           | 1,58  | 2,29E-04 | 8,02E-03 |
| <i>THC2343936</i>      | 1,79  | 2,30E-04 | 8,02E-03 |
| <i>BX100437</i>        | -1,23 | 2,31E-04 | 8,03E-03 |
| <i>A_24_P934975</i>    | 1,42  | 2,31E-04 | 8,03E-03 |
| <i>GIMAP1</i>          | -1,39 | 2,33E-04 | 8,04E-03 |
| <i>THC2274334</i>      | -1,28 | 2,33E-04 | 8,04E-03 |
| <i>KCTD6</i>           | -1,20 | 2,33E-04 | 8,04E-03 |
| <i>THC2283850</i>      | -1,17 | 2,33E-04 | 8,04E-03 |
| <i>SLC13A4</i>         | -1,12 | 2,32E-04 | 8,04E-03 |
| <i>THC2324430</i>      | 1,26  | 2,33E-04 | 8,04E-03 |
| <i>BG547692</i>        | 1,28  | 2,33E-04 | 8,04E-03 |
| <i>ENST00000245185</i> | 1,82  | 2,32E-04 | 8,04E-03 |
| <i>MAFF</i>            | 2,60  | 2,33E-04 | 8,04E-03 |
| <i>SMARCAD1</i>        | -1,18 | 2,35E-04 | 8,10E-03 |
| <i>TMEM1</i>           | -1,15 | 2,36E-04 | 8,10E-03 |
| <i>THC2285720</i>      | -1,32 | 2,36E-04 | 8,11E-03 |
| <i>AK021866</i>        | -1,27 | 2,37E-04 | 8,13E-03 |
| <i>BM932296</i>        | -1,24 | 2,37E-04 | 8,13E-03 |
| <i>A_32_P84119</i>     | -1,22 | 2,38E-04 | 8,15E-03 |
| <i>ENST00000358293</i> | -1,32 | 2,38E-04 | 8,15E-03 |
| <i>AK126439</i>        | -1,21 | 2,39E-04 | 8,16E-03 |
| <i>BX648207</i>        | -1,23 | 2,40E-04 | 8,18E-03 |
| <i>TUBB4</i>           | 1,32  | 2,40E-04 | 8,18E-03 |
| <i>BC033590</i>        | -1,44 | 2,41E-04 | 8,20E-03 |
| <i>AL711212</i>        | -1,41 | 2,41E-04 | 8,20E-03 |
| <i>AK027667</i>        | -1,51 | 2,42E-04 | 8,21E-03 |
| <i>TIGD2</i>           | -1,27 | 2,42E-04 | 8,21E-03 |
| <i>A_24_P927339</i>    | -1,16 | 2,42E-04 | 8,21E-03 |
| <i>OSMR</i>            | 1,26  | 2,43E-04 | 8,21E-03 |
| <i>C1orf163</i>        | -1,21 | 2,44E-04 | 8,23E-03 |
| <i>AK026687</i>        | -1,20 | 2,44E-04 | 8,23E-03 |
| <i>NP</i>              | 2,48  | 2,45E-04 | 8,27E-03 |
| <i>HSP90AA1</i>        | 1,26  | 2,47E-04 | 8,31E-03 |
| <i>C6orf188</i>        | 1,31  | 2,47E-04 | 8,31E-03 |

|                        |       |          |          |
|------------------------|-------|----------|----------|
| <i>PDE5A</i>           | 1,49  | 2,47E-04 | 8,31E-03 |
| <i>ENST00000330777</i> | -1,35 | 2,49E-04 | 8,33E-03 |
| <i>AK055067</i>        | -1,29 | 2,49E-04 | 8,33E-03 |
| <i>THC2406779</i>      | -1,28 | 2,49E-04 | 8,33E-03 |
| <i>THC2448843</i>      | -1,27 | 2,49E-04 | 8,33E-03 |
| <i>MGC39900</i>        | -1,26 | 2,49E-04 | 8,33E-03 |
| <i>OTOS</i>            | 1,30  | 2,50E-04 | 8,34E-03 |
| <i>RP11-535K18.3</i>   | 1,21  | 2,51E-04 | 8,38E-03 |
| <i>KCNG1</i>           | -2,69 | 2,52E-04 | 8,39E-03 |
| <i>DKFZp762I137</i>    | -1,28 | 2,52E-04 | 8,39E-03 |
| <i>BBS10</i>           | -1,25 | 2,52E-04 | 8,39E-03 |
| <i>ENST00000308077</i> | -1,27 | 2,53E-04 | 8,40E-03 |
| <i>AKR1C3</i>          | 1,38  | 2,53E-04 | 8,40E-03 |
| <i>A_32_P49035</i>     | 1,58  | 2,53E-04 | 8,40E-03 |
| <i>ZBTB34</i>          | -1,16 | 2,54E-04 | 8,42E-03 |
| <i>IL2RB</i>           | -1,57 | 2,55E-04 | 8,43E-03 |
| <i>THC2438685</i>      | -1,21 | 2,55E-04 | 8,43E-03 |
| <i>THC2375651</i>      | -1,33 | 2,56E-04 | 8,44E-03 |
| <i>BC032118</i>        | 1,23  | 2,56E-04 | 8,45E-03 |
| <i>RPESP</i>           | 1,60  | 2,57E-04 | 8,48E-03 |
| <i>FBLN5</i>           | -1,41 | 2,60E-04 | 8,56E-03 |
| <i>AK074670</i>        | -1,38 | 2,61E-04 | 8,59E-03 |
| <i>THC2278254</i>      | -1,35 | 2,63E-04 | 8,60E-03 |
| <i>THC2263389</i>      | -1,26 | 2,62E-04 | 8,60E-03 |
| <i>MGC52110</i>        | -1,23 | 2,62E-04 | 8,60E-03 |
| <i>A_24_P917363</i>    | -1,17 | 2,63E-04 | 8,60E-03 |
| <i>SMAD7</i>           | 1,37  | 2,63E-04 | 8,60E-03 |
| <i>HAS2</i>            | 1,60  | 2,66E-04 | 8,68E-03 |
| <i>KCNAB1</i>          | 1,50  | 2,66E-04 | 8,69E-03 |
| <i>TTL7</i>            | 1,44  | 2,67E-04 | 8,70E-03 |
| <i>LRRC8C</i>          | 1,25  | 2,67E-04 | 8,71E-03 |
| <i>RIPK1</i>           | 1,44  | 2,68E-04 | 8,71E-03 |
| <i>FLJ38451</i>        | -1,31 | 2,68E-04 | 8,71E-03 |
| <i>THC2446265</i>      | -1,19 | 2,71E-04 | 8,79E-03 |
| <i>TP53INP2</i>        | 1,40  | 2,71E-04 | 8,79E-03 |
| <i>AW751974</i>        | -1,34 | 2,72E-04 | 8,80E-03 |
| <i>CCNA2</i>           | -1,12 | 2,72E-04 | 8,80E-03 |
| <i>MAPT</i>            | 1,32  | 2,72E-04 | 8,80E-03 |
| <i>ZNF306</i>          | -1,26 | 2,73E-04 | 8,83E-03 |
| <i>AW833935</i>        | 1,52  | 2,74E-04 | 8,83E-03 |
| <i>THC2407189</i>      | 1,21  | 2,75E-04 | 8,85E-03 |
| <i>THC2438117</i>      | -1,19 | 2,77E-04 | 8,90E-03 |
| <i>C9orf23</i>         | -1,18 | 2,77E-04 | 8,90E-03 |
| <i>SCYL3</i>           | -1,17 | 2,77E-04 | 8,90E-03 |

|                        |       |          |          |
|------------------------|-------|----------|----------|
| <i>PSMD12</i>          | 1,17  | 2,77E-04 | 8,90E-03 |
| <i>EXOSC9</i>          | 1,20  | 2,78E-04 | 8,92E-03 |
| <i>ROR1</i>            | -1,31 | 2,79E-04 | 8,93E-03 |
| <i>ZNF551</i>          | -1,18 | 2,79E-04 | 8,94E-03 |
| <i>FAM118A</i>         | 1,18  | 2,80E-04 | 8,94E-03 |
| <i>BTN3A3</i>          | -1,18 | 2,80E-04 | 8,94E-03 |
| <i>ANGEL1</i>          | -1,15 | 2,82E-04 | 8,99E-03 |
| <i>CARD12</i>          | -1,28 | 2,82E-04 | 9,00E-03 |
| <i>FLJ36208</i>        | -1,22 | 2,86E-04 | 9,11E-03 |
| <i>C16orf51</i>        | -1,18 | 2,87E-04 | 9,11E-03 |
| <i>FOXC2</i>           | 1,15  | 2,87E-04 | 9,13E-03 |
| <i>KLF9</i>            | 1,63  | 2,89E-04 | 9,17E-03 |
| <i>CDH3</i>            | -1,61 | 2,90E-04 | 9,18E-03 |
| <i>ELK3</i>            | 1,23  | 2,93E-04 | 9,29E-03 |
| <i>SORCS2</i>          | -1,57 | 2,95E-04 | 9,32E-03 |
| <i>AK124166</i>        | -1,27 | 2,95E-04 | 9,32E-03 |
| <i>KLF14</i>           | 1,26  | 2,95E-04 | 9,32E-03 |
| <i>RHOQ</i>            | 1,34  | 2,95E-04 | 9,32E-03 |
| <i>MS4A2</i>           | -1,60 | 2,98E-04 | 9,35E-03 |
| <i>KIF1C</i>           | 1,16  | 2,97E-04 | 9,35E-03 |
| <i>A_23_P21882</i>     | 1,35  | 2,98E-04 | 9,35E-03 |
| <i>STK17B</i>          | 1,46  | 2,98E-04 | 9,35E-03 |
| <i>NFIL3</i>           | 2,15  | 2,98E-04 | 9,35E-03 |
| <i>C6orf134</i>        | -1,15 | 3,01E-04 | 9,43E-03 |
| <i>LOC285989</i>       | -1,20 | 3,02E-04 | 9,46E-03 |
| <i>TNFRSF8</i>         | -1,20 | 3,03E-04 | 9,48E-03 |
| <i>AF161344</i>        | 1,13  | 3,04E-04 | 9,49E-03 |
| <i>MIDN</i>            | 1,39  | 3,04E-04 | 9,49E-03 |
| <i>FLJ37953</i>        | -1,16 | 3,04E-04 | 9,50E-03 |
| <i>ENST00000310492</i> | -1,15 | 3,06E-04 | 9,53E-03 |
| <i>BC034428</i>        | -1,32 | 3,07E-04 | 9,55E-03 |
| <i>ZNF57</i>           | -1,30 | 3,07E-04 | 9,55E-03 |
| <i>RORC</i>            | 1,23  | 3,09E-04 | 9,59E-03 |
| <i>ENST00000378536</i> | 1,22  | 3,10E-04 | 9,61E-03 |
| <i>RP13-297E16.1</i>   | -1,12 | 3,10E-04 | 9,62E-03 |
| <i>PBEF1</i>           | 2,28  | 3,11E-04 | 9,63E-03 |
| <i>NKG7</i>            | -1,47 | 3,12E-04 | 9,65E-03 |
| <i>CA441361</i>        | 1,20  | 3,13E-04 | 9,68E-03 |
| <i>THC2331437</i>      | 1,35  | 3,13E-04 | 9,68E-03 |
| <i>ENST00000354271</i> | 1,16  | 3,14E-04 | 9,68E-03 |
| <i>THC2283340</i>      | -1,20 | 3,15E-04 | 9,69E-03 |
| <i>ENST00000355793</i> | 1,26  | 3,14E-04 | 9,69E-03 |
| <i>ARMC5</i>           | 1,21  | 3,15E-04 | 9,69E-03 |
| <i>ARG2</i>            | 1,38  | 3,16E-04 | 9,69E-03 |



|                        |       |          |          |
|------------------------|-------|----------|----------|
| <i>DUSP5</i>           | 2,08  | 3,16E-04 | 9,69E-03 |
| <i>C12orf28</i>        | 1,27  | 3,17E-04 | 9,72E-03 |
| <i>STK32B</i>          | -1,22 | 3,18E-04 | 9,74E-03 |
| <i>CR590573</i>        | -1,29 | 3,19E-04 | 9,75E-03 |
| <i>THC2409569</i>      | -1,27 | 3,19E-04 | 9,75E-03 |
| <i>A_24_P127517</i>    | 1,29  | 3,18E-04 | 9,75E-03 |
| <i>CREM</i>            | 1,53  | 3,20E-04 | 9,76E-03 |
| <i>ENST00000304963</i> | 1,48  | 3,20E-04 | 9,77E-03 |
| <i>SYT1</i>            | 1,47  | 3,21E-04 | 9,77E-03 |
| <i>A_23_P213350</i>    | 1,26  | 3,22E-04 | 9,79E-03 |
| <i>THC2411930</i>      | -1,30 | 3,22E-04 | 9,80E-03 |
| <i>RAB27A</i>          | 1,23  | 3,23E-04 | 9,81E-03 |
| <i>AK021467</i>        | -1,37 | 3,25E-04 | 9,88E-03 |
| <i>KIAA1713</i>        | -1,28 | 3,26E-04 | 9,88E-03 |
| <i>A_32_P10831</i>     | -1,26 | 3,27E-04 | 9,88E-03 |
| <i>LOC144233</i>       | -1,23 | 3,27E-04 | 9,88E-03 |
| <i>SENP8</i>           | -1,19 | 3,27E-04 | 9,88E-03 |
| <i>THC2446045</i>      | -1,48 | 3,30E-04 | 9,94E-03 |
| <i>ACSS1</i>           | -1,21 | 3,29E-04 | 9,94E-03 |
| <i>THC2440787</i>      | -1,37 | 3,31E-04 | 9,98E-03 |
| <i>HDAC4</i>           | -1,23 | 3,34E-04 | 1,01E-02 |
| <i>CGNL1</i>           | -1,44 | 3,35E-04 | 1,01E-02 |
| <i>BC045174</i>        | -1,16 | 3,36E-04 | 1,01E-02 |
| <i>ZBED5</i>           | -1,20 | 3,37E-04 | 1,01E-02 |
| <i>BC031876</i>        | -1,17 | 3,36E-04 | 1,01E-02 |
| <i>AK054605</i>        | -1,19 | 3,38E-04 | 1,01E-02 |
| <i>KIAA1655</i>        | -1,21 | 3,40E-04 | 1,02E-02 |
| <i>ENST00000379616</i> | 1,66  | 3,41E-04 | 1,02E-02 |
| <i>SASH1</i>           | 1,28  | 3,41E-04 | 1,02E-02 |
| <i>BC030813</i>        | -3,22 | 3,43E-04 | 1,02E-02 |
| <i>POLG2</i>           | -1,25 | 3,44E-04 | 1,02E-02 |
| <i>AF217973</i>        | -1,17 | 3,45E-04 | 1,02E-02 |
| <i>ZNF607</i>          | -1,15 | 3,44E-04 | 1,02E-02 |
| <i>SYTL2</i>           | 1,44  | 3,44E-04 | 1,02E-02 |
| <i>EGR3</i>            | 2,58  | 3,44E-04 | 1,02E-02 |
| <i>RGS16</i>           | 3,28  | 3,45E-04 | 1,02E-02 |
| <i>THC2373936</i>      | -1,32 | 3,47E-04 | 1,03E-02 |
| <i>SNAP25</i>          | -1,34 | 3,50E-04 | 1,03E-02 |
| <i>THC2400562</i>      | -1,31 | 3,49E-04 | 1,03E-02 |
| <i>METTL7A</i>         | -1,28 | 3,50E-04 | 1,03E-02 |
| <i>AI911989</i>        | -1,27 | 3,48E-04 | 1,03E-02 |
| <i>ZNF350</i>          | -1,25 | 3,49E-04 | 1,03E-02 |
| <i>A_32_P211683</i>    | -1,21 | 3,49E-04 | 1,03E-02 |
| <i>AK023682</i>        | -1,20 | 3,51E-04 | 1,03E-02 |

|                        |       |          |          |
|------------------------|-------|----------|----------|
| <i>THC2382540</i>      | -1,16 | 3,49E-04 | 1,03E-02 |
| <i>A_24_P783679</i>    | 1,24  | 3,50E-04 | 1,03E-02 |
| <i>ENST00000324076</i> | 1,34  | 3,50E-04 | 1,03E-02 |
| <i>ZNF319</i>          | -1,29 | 3,51E-04 | 1,03E-02 |
| <i>AI571129</i>        | -1,39 | 3,52E-04 | 1,03E-02 |
| <i>ZNF250</i>          | -1,18 | 3,52E-04 | 1,03E-02 |
| <i>AF119905</i>        | 1,16  | 3,52E-04 | 1,03E-02 |
| <i>PRKAA1</i>          | 1,17  | 3,53E-04 | 1,03E-02 |
| <i>BF801333</i>        | -1,26 | 3,54E-04 | 1,03E-02 |
| <i>IGF1R</i>           | 1,27  | 3,55E-04 | 1,04E-02 |
| <i>LONRF2</i>          | -1,74 | 3,56E-04 | 1,04E-02 |
| <i>WDR89</i>           | -1,14 | 3,58E-04 | 1,04E-02 |
| <i>LHX9</i>            | 1,12  | 3,58E-04 | 1,04E-02 |
| <i>ZNF331</i>          | 1,77  | 3,59E-04 | 1,04E-02 |
| <i>LOC440334</i>       | -1,22 | 3,60E-04 | 1,04E-02 |
| <i>ERN1</i>            | 1,27  | 3,61E-04 | 1,05E-02 |
| <i>PDK3</i>            | 1,28  | 3,61E-04 | 1,05E-02 |
| <i>IAPP</i>            | 1,30  | 3,61E-04 | 1,05E-02 |
| <i>A_23_P103951</i>    | 1,64  | 3,65E-04 | 1,06E-02 |
| <i>MEIS1</i>           | -1,37 | 3,67E-04 | 1,06E-02 |
| <i>ATP1A4</i>          | 1,23  | 3,67E-04 | 1,06E-02 |
| <i>THC2439202</i>      | -1,19 | 3,68E-04 | 1,06E-02 |
| <i>LOC51336</i>        | -1,14 | 3,69E-04 | 1,06E-02 |
| <i>THC2282466</i>      | -1,38 | 3,69E-04 | 1,06E-02 |
| <i>HCG12</i>           | -1,24 | 3,70E-04 | 1,06E-02 |
| <i>THC2426594</i>      | -1,96 | 3,74E-04 | 1,07E-02 |
| <i>LOC654434</i>       | -1,28 | 3,73E-04 | 1,07E-02 |
| <i>ZNF354A</i>         | -1,16 | 3,73E-04 | 1,07E-02 |
| <i>BM476468</i>        | 1,17  | 3,73E-04 | 1,07E-02 |
| <i>MYO3A</i>           | 1,18  | 3,71E-04 | 1,07E-02 |
| <i>FAM102B</i>         | 1,19  | 3,72E-04 | 1,07E-02 |
| <i>AIG1</i>            | 1,22  | 3,72E-04 | 1,07E-02 |
| <i>CR740121</i>        | 1,43  | 3,74E-04 | 1,07E-02 |
| <i>THC2430041</i>      | -1,26 | 3,75E-04 | 1,07E-02 |
| <i>ENOSF1</i>          | -1,20 | 3,75E-04 | 1,07E-02 |
| <i>FLJ13769</i>        | -1,25 | 3,76E-04 | 1,07E-02 |
| <i>FOSL1</i>           | 1,83  | 3,76E-04 | 1,07E-02 |
| <i>THC2241534</i>      | 1,30  | 3,77E-04 | 1,07E-02 |
| <i>ZNF519</i>          | -1,37 | 3,79E-04 | 1,07E-02 |
| <i>AK097051</i>        | -1,22 | 3,79E-04 | 1,07E-02 |
| <i>C6orf106</i>        | 1,14  | 3,78E-04 | 1,07E-02 |
| <i>TNFAIP1</i>         | 1,29  | 3,79E-04 | 1,07E-02 |
| <i>MPP7</i>            | 1,39  | 3,80E-04 | 1,07E-02 |
| <i>A_24_P920381</i>    | 1,14  | 3,80E-04 | 1,07E-02 |

|                        |       |          |          |
|------------------------|-------|----------|----------|
| <i>GNLY</i>            | -1,46 | 3,81E-04 | 1,07E-02 |
| <i>MGC23985</i>        | 1,21  | 3,81E-04 | 1,07E-02 |
| <i>C9orf3</i>          | 1,22  | 3,82E-04 | 1,08E-02 |
| <i>AK024937</i>        | 1,24  | 3,83E-04 | 1,08E-02 |
| <i>BC040678</i>        | 1,26  | 3,83E-04 | 1,08E-02 |
| <i>AL136830</i>        | 1,17  | 3,85E-04 | 1,08E-02 |
| <i>A_32_P172215</i>    | -1,22 | 3,86E-04 | 1,09E-02 |
| <i>CN414940</i>        | -1,36 | 3,87E-04 | 1,09E-02 |
| <i>ZNF512</i>          | -1,20 | 3,90E-04 | 1,09E-02 |
| <i>ZNF711</i>          | -1,13 | 3,91E-04 | 1,10E-02 |
| <i>LOC390595</i>       | -1,20 | 3,93E-04 | 1,10E-02 |
| <i>TRIM47</i>          | 1,17  | 3,95E-04 | 1,10E-02 |
| <i>MCEE</i>            | -1,22 | 3,96E-04 | 1,11E-02 |
| <i>THC2443571</i>      | 1,20  | 3,97E-04 | 1,11E-02 |
| <i>CB984746</i>        | -1,47 | 3,97E-04 | 1,11E-02 |
| <i>CDC14C</i>          | 1,18  | 3,98E-04 | 1,11E-02 |
| <i>SNAI2</i>           | -1,45 | 3,99E-04 | 1,11E-02 |
| <i>C19orf39</i>        | -1,19 | 4,01E-04 | 1,11E-02 |
| <i>RNF152</i>          | 1,35  | 4,01E-04 | 1,12E-02 |
| <i>BC104430</i>        | -1,25 | 4,02E-04 | 1,12E-02 |
| <i>MLSTD1</i>          | 1,30  | 4,03E-04 | 1,12E-02 |
| <i>ENST00000373656</i> | -1,28 | 4,03E-04 | 1,12E-02 |
| <i>SLC25A17</i>        | -1,15 | 4,05E-04 | 1,12E-02 |
| <i>ENST00000382579</i> | -1,13 | 4,05E-04 | 1,12E-02 |
| <i>FOXC1</i>           | 1,70  | 4,05E-04 | 1,12E-02 |
| <i>ZNF180</i>          | -1,25 | 4,06E-04 | 1,12E-02 |
| <i>SLC2A3</i>          | 2,10  | 4,07E-04 | 1,12E-02 |
| <i>MRPS36</i>          | 1,12  | 4,09E-04 | 1,13E-02 |
| <i>KCNQ3</i>           | 1,13  | 4,10E-04 | 1,13E-02 |
| <i>SIT1</i>            | -1,21 | 4,12E-04 | 1,13E-02 |
| <i>BC089156</i>        | -1,21 | 4,13E-04 | 1,13E-02 |
| <i>AL518525</i>        | -1,14 | 4,13E-04 | 1,13E-02 |
| <i>TMEM157</i>         | 1,19  | 4,14E-04 | 1,13E-02 |
| <i>BC038556</i>        | 1,23  | 4,14E-04 | 1,13E-02 |
| <i>AK057798</i>        | -1,45 | 4,15E-04 | 1,14E-02 |
| <i>ENST00000314720</i> | -1,25 | 4,15E-04 | 1,14E-02 |
| <i>A_24_P152278</i>    | 1,36  | 4,16E-04 | 1,14E-02 |
| <i>THC2284074</i>      | -1,33 | 4,17E-04 | 1,14E-02 |
| <i>FADS2</i>           | -1,41 | 4,21E-04 | 1,14E-02 |
| <i>THC2373518</i>      | -1,34 | 4,21E-04 | 1,14E-02 |
| <i>LOC148898</i>       | -1,33 | 4,21E-04 | 1,14E-02 |
| <i>SLC40A1</i>         | -1,33 | 4,20E-04 | 1,14E-02 |
| <i>RAB13</i>           | 1,21  | 4,20E-04 | 1,14E-02 |
| <i>PSCD2</i>           | 1,22  | 4,21E-04 | 1,14E-02 |

|                        |       |          |          |
|------------------------|-------|----------|----------|
| <i>ENST00000278934</i> | 1,50  | 4,19E-04 | 1,14E-02 |
| <i>C1orf156</i>        | -1,24 | 4,22E-04 | 1,14E-02 |
| <i>ALS2CR2</i>         | -1,22 | 4,22E-04 | 1,14E-02 |
| <i>ZNF12</i>           | -1,19 | 4,23E-04 | 1,14E-02 |
| <i>ZNF169</i>          | -1,19 | 4,24E-04 | 1,15E-02 |
| <i>LOC284371</i>       | -1,15 | 4,24E-04 | 1,15E-02 |
| <i>ENST00000369202</i> | -1,20 | 4,26E-04 | 1,15E-02 |
| <i>ALDH7A1</i>         | -1,14 | 4,26E-04 | 1,15E-02 |
| <i>ENST00000312828</i> | 1,33  | 4,26E-04 | 1,15E-02 |
| <i>TOX</i>             | 1,41  | 4,27E-04 | 1,15E-02 |
| <i>THC2313495</i>      | 1,42  | 4,27E-04 | 1,15E-02 |
| <i>BCL3</i>            | 1,74  | 4,27E-04 | 1,15E-02 |
| <i>SYT5</i>            | 1,26  | 4,28E-04 | 1,15E-02 |
| <i>THC2280913</i>      | -1,20 | 4,29E-04 | 1,15E-02 |
| <i>A_23_P44053</i>     | -2,26 | 4,30E-04 | 1,15E-02 |
| <i>PCDH1</i>           | 1,22  | 4,30E-04 | 1,15E-02 |
| <i>ENST00000380874</i> | 1,57  | 4,32E-04 | 1,16E-02 |
| <i>TMEM29</i>          | -1,21 | 4,33E-04 | 1,16E-02 |
| <i>RIBC2</i>           | 1,31  | 4,34E-04 | 1,16E-02 |
| <i>CHSY1</i>           | 1,39  | 4,35E-04 | 1,16E-02 |
| <i>A_32_P200025</i>    | -1,48 | 4,36E-04 | 1,16E-02 |
| <i>ABCA3</i>           | 1,24  | 4,36E-04 | 1,16E-02 |
| <i>FASTKD3</i>         | -1,18 | 4,38E-04 | 1,17E-02 |
| <i>A_24_P931053</i>    | -1,21 | 4,42E-04 | 1,17E-02 |
| <i>PPP1R2</i>          | 1,15  | 4,42E-04 | 1,17E-02 |
| <i>KCTD9</i>           | 1,18  | 4,42E-04 | 1,17E-02 |
| <i>AF321778</i>        | 1,25  | 4,42E-04 | 1,17E-02 |
| <i>ZNF7</i>            | -1,18 | 4,44E-04 | 1,18E-02 |
| <i>MARCKSL1</i>        | -1,32 | 4,45E-04 | 1,18E-02 |
| <i>CR607569</i>        | -1,21 | 4,45E-04 | 1,18E-02 |
| <i>LOC91661</i>        | -1,23 | 4,47E-04 | 1,18E-02 |
| <i>ELL2</i>            | 1,47  | 4,47E-04 | 1,18E-02 |
| <i>THC2270231</i>      | 2,12  | 4,46E-04 | 1,18E-02 |
| <i>THC2270807</i>      | 1,15  | 4,48E-04 | 1,18E-02 |
| <i>A_32_P167723</i>    | 1,16  | 4,48E-04 | 1,18E-02 |
| <i>ENST00000374279</i> | 1,56  | 4,48E-04 | 1,18E-02 |
| <i>SPIRE1</i>          | 1,16  | 4,50E-04 | 1,18E-02 |
| <i>DACT2</i>           | -1,55 | 4,51E-04 | 1,19E-02 |
| <i>BCR</i>             | 1,18  | 4,51E-04 | 1,19E-02 |
| <i>LRMP</i>            | -1,33 | 4,52E-04 | 1,19E-02 |
| <i>PDGFRL</i>          | -1,41 | 4,54E-04 | 1,19E-02 |
| <i>GEMIN6</i>          | -1,16 | 4,55E-04 | 1,19E-02 |
| <i>CR617865</i>        | -1,27 | 4,57E-04 | 1,20E-02 |
| <i>ENST00000332498</i> | 1,43  | 4,57E-04 | 1,20E-02 |

|                        |       |          |          |
|------------------------|-------|----------|----------|
| <i>MCL1</i>            | 1,67  | 4,56E-04 | 1,20E-02 |
| <i>ZFP1</i>            | -1,16 | 4,59E-04 | 1,20E-02 |
| <i>CRIP1</i>           | 1,32  | 4,58E-04 | 1,20E-02 |
| <i>THC2385388</i>      | 1,31  | 4,60E-04 | 1,20E-02 |
| <i>AL833005</i>        | 1,99  | 4,63E-04 | 1,21E-02 |
| <i>MT2A</i>            | 1,79  | 4,63E-04 | 1,21E-02 |
| <i>GCS1</i>            | -1,10 | 4,65E-04 | 1,21E-02 |
| <i>UBL3</i>            | -1,14 | 4,66E-04 | 1,21E-02 |
| <i>LOC157627</i>       | 1,33  | 4,66E-04 | 1,21E-02 |
| <i>ENST00000356555</i> | -1,31 | 4,68E-04 | 1,21E-02 |
| <i>THC2317278</i>      | -1,25 | 4,68E-04 | 1,21E-02 |
| <i>SAMD3</i>           | -1,23 | 4,67E-04 | 1,21E-02 |
| <i>AK025388</i>        | -1,13 | 4,69E-04 | 1,21E-02 |
| <i>BX095281</i>        | 1,16  | 4,69E-04 | 1,21E-02 |
| <i>PLGLA1</i>          | -1,21 | 4,69E-04 | 1,21E-02 |
| <i>JRKL</i>            | -1,25 | 4,71E-04 | 1,21E-02 |
| <i>DBN1</i>            | -1,22 | 4,71E-04 | 1,21E-02 |
| <i>RP11-50D16.3</i>    | -1,20 | 4,71E-04 | 1,21E-02 |
| <i>HDHD2</i>           | -1,17 | 4,70E-04 | 1,21E-02 |
| <i>AW327568</i>        | 1,34  | 4,72E-04 | 1,21E-02 |
| <i>AF384996</i>        | 1,21  | 4,76E-04 | 1,22E-02 |
| <i>GIMAP2</i>          | -1,30 | 4,76E-04 | 1,22E-02 |
| <i>MGC26963</i>        | 1,33  | 4,78E-04 | 1,23E-02 |
| <i>THC2344956</i>      | -1,50 | 4,82E-04 | 1,24E-02 |
| <i>BM929941</i>        | -1,32 | 4,82E-04 | 1,24E-02 |
| <i>THC2280689</i>      | -1,24 | 4,84E-04 | 1,24E-02 |
| <i>STX11</i>           | 1,26  | 4,84E-04 | 1,24E-02 |
| <i>AK090762</i>        | -1,16 | 4,85E-04 | 1,24E-02 |
| <i>LOC285908</i>       | -1,19 | 4,86E-04 | 1,24E-02 |
| <i>A_32_P169692</i>    | -1,18 | 4,87E-04 | 1,24E-02 |
| <i>ENST00000376356</i> | -1,18 | 4,87E-04 | 1,24E-02 |
| <i>CR594281</i>        | -1,28 | 4,89E-04 | 1,24E-02 |
| <i>AI525856</i>        | -1,21 | 4,89E-04 | 1,24E-02 |
| <i>ENST00000265149</i> | -1,18 | 4,88E-04 | 1,24E-02 |
| <i>DCUN1D3</i>         | 1,36  | 4,88E-04 | 1,24E-02 |
| <i>LOH3CR2A</i>        | 1,78  | 4,89E-04 | 1,24E-02 |
| <i>PPP2R1B</i>         | 1,18  | 4,95E-04 | 1,26E-02 |
| <i>BU153693</i>        | -1,17 | 4,95E-04 | 1,26E-02 |
| <i>FLJ11235</i>        | 1,16  | 4,97E-04 | 1,26E-02 |
| <i>THC2312756</i>      | -1,42 | 4,97E-04 | 1,26E-02 |
| <i>ZNF443</i>          | -1,19 | 5,00E-04 | 1,26E-02 |
| <i>RECQL5</i>          | -1,12 | 5,00E-04 | 1,26E-02 |
| <i>ATP1A3</i>          | 1,22  | 5,02E-04 | 1,27E-02 |
| <i>MGC16384</i>        | -1,54 | 5,02E-04 | 1,27E-02 |

|                        |       |          |          |
|------------------------|-------|----------|----------|
| <i>RAB18</i>           | 1,21  | 5,03E-04 | 1,27E-02 |
| <i>CYCS</i>            | 1,27  | 5,03E-04 | 1,27E-02 |
| <i>BC017937</i>        | -1,19 | 5,05E-04 | 1,27E-02 |
| <i>ENSA</i>            | 1,17  | 5,06E-04 | 1,27E-02 |
| <i>A_32_P73707</i>     | -1,15 | 5,07E-04 | 1,27E-02 |
| <i>B3GALNT2</i>        | 1,31  | 5,07E-04 | 1,27E-02 |
| <i>ZBTB11</i>          | -1,17 | 5,09E-04 | 1,27E-02 |
| <i>GRAMD1A</i>         | 1,24  | 5,08E-04 | 1,27E-02 |
| <i>BQ002790</i>        | 1,53  | 5,08E-04 | 1,27E-02 |
| <i>HSPB8</i>           | 1,65  | 5,11E-04 | 1,28E-02 |
| <i>A_32_P194102</i>    | -1,13 | 5,13E-04 | 1,28E-02 |
| <i>HIPK3</i>           | 1,26  | 5,13E-04 | 1,28E-02 |
| <i>ADAMTS4</i>         | 3,69  | 5,13E-04 | 1,28E-02 |
| <i>AK096415</i>        | -1,23 | 5,15E-04 | 1,28E-02 |
| <i>ATP8B1</i>          | 1,23  | 5,16E-04 | 1,29E-02 |
| <i>A_32_P108396</i>    | -1,45 | 5,17E-04 | 1,29E-02 |
| <i>BM930248</i>        | 1,42  | 5,18E-04 | 1,29E-02 |
| <i>ENST00000324677</i> | 1,27  | 5,19E-04 | 1,29E-02 |
| <i>STAT3</i>           | 1,17  | 5,20E-04 | 1,29E-02 |
| <i>CDC42SE1</i>        | 1,20  | 5,22E-04 | 1,30E-02 |
| <i>IGJ</i>             | -2,64 | 5,23E-04 | 1,30E-02 |
| <i>CR625942</i>        | -1,20 | 5,24E-04 | 1,30E-02 |
| <i>ENST00000295410</i> | -2,66 | 5,24E-04 | 1,30E-02 |
| <i>AK125176</i>        | -1,50 | 5,27E-04 | 1,30E-02 |
| <i>DET1</i>            | -1,23 | 5,26E-04 | 1,30E-02 |
| <i>AK092846</i>        | -1,14 | 5,27E-04 | 1,30E-02 |
| <i>GJA4</i>            | 1,46  | 5,27E-04 | 1,30E-02 |
| <i>BG462058</i>        | 1,14  | 5,30E-04 | 1,31E-02 |
| <i>THC2383106</i>      | -1,28 | 5,33E-04 | 1,31E-02 |
| <i>CR617352</i>        | -1,14 | 5,33E-04 | 1,31E-02 |
| <i>AK021744</i>        | -1,30 | 5,34E-04 | 1,31E-02 |
| <i>CHL1</i>            | 1,19  | 5,35E-04 | 1,32E-02 |
| <i>SLCO2B1</i>         | -1,27 | 5,36E-04 | 1,32E-02 |
| <i>AK075052</i>        | -1,26 | 5,36E-04 | 1,32E-02 |
| <i>RPS18</i>           | -1,14 | 5,37E-04 | 1,32E-02 |
| <i>ZNRF2</i>           | 1,17  | 5,37E-04 | 1,32E-02 |
| <i>GCN5L2</i>          | -1,25 | 5,37E-04 | 1,32E-02 |
| <i>ENST00000312412</i> | -1,21 | 5,39E-04 | 1,32E-02 |
| <i>ADAM6</i>           | 1,13  | 5,40E-04 | 1,32E-02 |
| <i>AK093521</i>        | -1,44 | 5,42E-04 | 1,32E-02 |
| <i>GIMAP7</i>          | -1,38 | 5,40E-04 | 1,32E-02 |
| <i>C8orf30A</i>        | -1,19 | 5,42E-04 | 1,32E-02 |
| <i>NUP210</i>          | -1,14 | 5,42E-04 | 1,32E-02 |
| <i>THC2313756</i>      | 1,21  | 5,41E-04 | 1,32E-02 |

|                 |       |          |          |
|-----------------|-------|----------|----------|
| ARVCF           | 1,32  | 5,44E-04 | 1,32E-02 |
| ZNF596          | -1,15 | 5,45E-04 | 1,32E-02 |
| KRTAP8-1        | 1,36  | 5,45E-04 | 1,32E-02 |
| CR590862        | -1,18 | 5,46E-04 | 1,33E-02 |
| GSDML           | -1,18 | 5,47E-04 | 1,33E-02 |
| DYNLT3          | 1,17  | 5,49E-04 | 1,33E-02 |
| MT1B            | 1,69  | 5,49E-04 | 1,33E-02 |
| BX111338        | -1,18 | 5,53E-04 | 1,34E-02 |
| C1orf52         | 1,17  | 5,53E-04 | 1,34E-02 |
| CD93            | 1,32  | 5,53E-04 | 1,34E-02 |
| CRIM1           | 1,41  | 5,53E-04 | 1,34E-02 |
| NCOA7           | 1,61  | 5,54E-04 | 1,34E-02 |
| THC2339776      | -1,20 | 5,56E-04 | 1,34E-02 |
| TSHZ2           | -1,24 | 5,56E-04 | 1,34E-02 |
| AKO22299        | -1,25 | 5,57E-04 | 1,34E-02 |
| PTDSR           | 1,25  | 5,58E-04 | 1,34E-02 |
| THC2336713      | 1,33  | 5,58E-04 | 1,34E-02 |
| C8orf4          | 1,59  | 5,61E-04 | 1,35E-02 |
| SIPA1L1         | 1,23  | 5,62E-04 | 1,35E-02 |
| BC067908        | -1,32 | 5,64E-04 | 1,35E-02 |
| HOXB6           | -1,36 | 5,66E-04 | 1,35E-02 |
| THC2379429      | -1,24 | 5,67E-04 | 1,35E-02 |
| ENST00000283760 | -1,22 | 5,67E-04 | 1,35E-02 |
| BTBD15          | 1,13  | 5,66E-04 | 1,35E-02 |
| C14orf4         | 1,18  | 5,66E-04 | 1,35E-02 |
| ZNF364          | 1,21  | 5,67E-04 | 1,35E-02 |
| ABLIM2          | 1,30  | 5,65E-04 | 1,35E-02 |
| PMS1            | -1,18 | 5,71E-04 | 1,36E-02 |
| SETD5           | -1,12 | 5,72E-04 | 1,36E-02 |
| LOC400506       | -1,33 | 5,75E-04 | 1,36E-02 |
| AL832717        | -1,26 | 5,74E-04 | 1,36E-02 |
| ITGA10          | 1,15  | 5,74E-04 | 1,36E-02 |
| A_32_P11501     | 1,28  | 5,75E-04 | 1,36E-02 |
| KIAA1922        | 1,35  | 5,73E-04 | 1,36E-02 |
| ETS2            | 1,46  | 5,75E-04 | 1,36E-02 |
| IL1R1           | 1,47  | 5,77E-04 | 1,37E-02 |
| GRAMD3          | -1,24 | 5,78E-04 | 1,37E-02 |
| ENST00000254109 | -1,24 | 5,78E-04 | 1,37E-02 |
| CCDC9           | 1,21  | 5,77E-04 | 1,37E-02 |
| AY033611        | 1,20  | 5,80E-04 | 1,37E-02 |
| A_32_P110016    | -1,20 | 5,81E-04 | 1,37E-02 |
| CR627148        | -1,30 | 5,83E-04 | 1,37E-02 |
| NDST2           | -1,18 | 5,83E-04 | 1,37E-02 |
| PFKFB3          | 1,36  | 5,83E-04 | 1,37E-02 |

|                        |       |          |          |
|------------------------|-------|----------|----------|
| <i>ENST00000370703</i> | 1,41  | 5,82E-04 | 1,37E-02 |
| <i>A_24_P487766</i>    | 1,17  | 5,84E-04 | 1,37E-02 |
| <i>PLAC8</i>           | -1,26 | 5,85E-04 | 1,38E-02 |
| <i>TSC1</i>            | -1,13 | 5,86E-04 | 1,38E-02 |
| <i>RAB3A</i>           | 1,15  | 5,86E-04 | 1,38E-02 |
| <i>LOC284244</i>       | -1,32 | 5,88E-04 | 1,38E-02 |
| <i>GRPEL2</i>          | -1,15 | 5,91E-04 | 1,38E-02 |
| <i>LOC647065</i>       | -1,16 | 5,92E-04 | 1,38E-02 |
| <i>EMP1</i>            | 2,02  | 5,92E-04 | 1,38E-02 |
| <i>A_32_P148407</i>    | 1,14  | 5,93E-04 | 1,39E-02 |
| <i>A_24_P136415</i>    | -1,20 | 5,94E-04 | 1,39E-02 |
| <i>A_24_P110487</i>    | -1,23 | 5,95E-04 | 1,39E-02 |
| <i>PHLDA1</i>          | 1,77  | 5,96E-04 | 1,39E-02 |
| <i>BU943730</i>        | 2,32  | 5,96E-04 | 1,39E-02 |
| <i>THC2337454</i>      | -1,17 | 5,97E-04 | 1,39E-02 |
| <i>ENST00000321892</i> | 1,17  | 5,98E-04 | 1,39E-02 |
| <i>THC2373490</i>      | -1,20 | 5,98E-04 | 1,39E-02 |
| <i>ENST00000258884</i> | -1,28 | 6,01E-04 | 1,40E-02 |
| <i>WIF1</i>            | -1,15 | 6,01E-04 | 1,40E-02 |
| <i>BC029907</i>        | -1,37 | 6,04E-04 | 1,40E-02 |
| <i>ATP6V0E2L</i>       | 1,16  | 6,03E-04 | 1,40E-02 |
| <i>FADS3</i>           | 1,22  | 6,03E-04 | 1,40E-02 |
| <i>CCDC117</i>         | -1,17 | 6,05E-04 | 1,40E-02 |
| <i>USPL1</i>           | -1,15 | 6,06E-04 | 1,40E-02 |
| <i>GABARAPL1</i>       | 1,30  | 6,06E-04 | 1,40E-02 |
| <i>WNT2</i>            | -1,45 | 6,08E-04 | 1,40E-02 |
| <i>LOC554206</i>       | -1,25 | 6,08E-04 | 1,40E-02 |
| <i>ZNF595</i>          | -1,13 | 6,08E-04 | 1,40E-02 |
| <i>SCAP2</i>           | 1,21  | 6,09E-04 | 1,40E-02 |
| <i>TM4SF1</i>          | 1,52  | 6,08E-04 | 1,40E-02 |
| <i>TMEM30A</i>         | 1,13  | 6,10E-04 | 1,40E-02 |
| <i>THC2444209</i>      | -1,92 | 6,10E-04 | 1,40E-02 |
| <i>AK022364</i>        | -1,21 | 6,11E-04 | 1,40E-02 |
| <i>THC2385462</i>      | 1,42  | 6,12E-04 | 1,40E-02 |
| <i>BACH1</i>           | 1,25  | 6,14E-04 | 1,41E-02 |
| <i>RP11-93B10.1</i>    | -1,17 | 6,18E-04 | 1,42E-02 |
| <i>PEX16</i>           | 1,17  | 6,17E-04 | 1,42E-02 |
| <i>HAPLN3</i>          | 1,32  | 6,18E-04 | 1,42E-02 |
| <i>ZNF420</i>          | -1,22 | 6,19E-04 | 1,42E-02 |
| <i>TBC1D24</i>         | -1,16 | 6,19E-04 | 1,42E-02 |
| <i>TAS2R10</i>         | -1,27 | 6,22E-04 | 1,42E-02 |
| <i>UBE2D3</i>          | 1,14  | 6,22E-04 | 1,42E-02 |
| <i>A_24_P943429</i>    | -1,24 | 6,23E-04 | 1,42E-02 |
| <i>ZFAND5</i>          | 1,23  | 6,23E-04 | 1,42E-02 |



|                        |       |          |          |
|------------------------|-------|----------|----------|
| <i>LINS1</i>           | -1,14 | 6,26E-04 | 1,43E-02 |
| <i>FLJ14107</i>        | 1,15  | 6,27E-04 | 1,43E-02 |
| <i>AK096401</i>        | -1,15 | 6,28E-04 | 1,43E-02 |
| <i>GAS1</i>            | -1,60 | 6,35E-04 | 1,44E-02 |
| <i>C12orf11</i>        | -1,18 | 6,35E-04 | 1,44E-02 |
| <i>THC2441937</i>      | 1,31  | 6,36E-04 | 1,44E-02 |
| <i>ZNF397</i>          | -1,20 | 6,37E-04 | 1,44E-02 |
| <i>THC2406727</i>      | -1,25 | 6,39E-04 | 1,45E-02 |
| <i>RNASEL</i>          | -1,24 | 6,39E-04 | 1,45E-02 |
| <i>BC030993</i>        | -1,31 | 6,41E-04 | 1,45E-02 |
| <i>MGC13138</i>        | -1,16 | 6,42E-04 | 1,45E-02 |
| <i>CPEB2</i>           | 1,20  | 6,42E-04 | 1,45E-02 |
| <i>THC2376737</i>      | -1,31 | 6,45E-04 | 1,46E-02 |
| <i>PCF11</i>           | 1,25  | 6,45E-04 | 1,46E-02 |
| <i>AK090827</i>        | -1,29 | 6,47E-04 | 1,46E-02 |
| <i>MRM1</i>            | -1,23 | 6,48E-04 | 1,46E-02 |
| <i>THC2316043</i>      | -1,28 | 6,49E-04 | 1,46E-02 |
| <i>SFT2D3</i>          | -1,18 | 6,50E-04 | 1,46E-02 |
| <i>BC017770</i>        | 1,23  | 6,51E-04 | 1,46E-02 |
| <i>ALDH5A1</i>         | -1,17 | 6,54E-04 | 1,47E-02 |
| <i>ENST00000356177</i> | 1,13  | 6,54E-04 | 1,47E-02 |
| <i>DDEF1</i>           | 1,19  | 6,53E-04 | 1,47E-02 |
| <i>ENST00000251847</i> | 1,23  | 6,54E-04 | 1,47E-02 |
| <i>MT1H</i>            | 1,59  | 6,53E-04 | 1,47E-02 |
| <i>MGC62100</i>        | 1,14  | 6,59E-04 | 1,47E-02 |
| <i>FRS3</i>            | -1,16 | 6,61E-04 | 1,48E-02 |
| <i>THC2436786</i>      | 1,13  | 6,63E-04 | 1,48E-02 |
| <i>THC2389705</i>      | -1,39 | 6,63E-04 | 1,48E-02 |
| <i>UBE2J1</i>          | 1,27  | 6,65E-04 | 1,48E-02 |
| <i>LOC646326</i>       | -1,37 | 6,67E-04 | 1,48E-02 |
| <i>THC2440634</i>      | -1,37 | 6,68E-04 | 1,48E-02 |
| <i>AK123750</i>        | -1,23 | 6,66E-04 | 1,48E-02 |
| <i>FEM1B</i>           | 1,20  | 6,68E-04 | 1,48E-02 |
| <i>THC2336839</i>      | 1,25  | 6,67E-04 | 1,48E-02 |
| <i>ARPM1</i>           | 1,29  | 6,67E-04 | 1,48E-02 |
| <i>THC2415133</i>      | -1,18 | 6,69E-04 | 1,49E-02 |
| <i>CNTFR</i>           | -1,40 | 6,70E-04 | 1,49E-02 |
| <i>C1orf174</i>        | -1,10 | 6,73E-04 | 1,49E-02 |
| <i>A_24_P911378</i>    | 1,27  | 6,74E-04 | 1,49E-02 |
| <i>FGF9</i>            | -1,84 | 6,75E-04 | 1,49E-02 |
| <i>THC2304444</i>      | -1,15 | 6,77E-04 | 1,50E-02 |
| <i>PTPRCAP</i>         | -1,21 | 6,83E-04 | 1,51E-02 |
| <i>A_32_P222241</i>    | -1,37 | 6,84E-04 | 1,51E-02 |
| <i>CFDP1</i>           | -1,14 | 6,85E-04 | 1,51E-02 |

|                        |       |          |          |
|------------------------|-------|----------|----------|
| <i>TSSC4</i>           | 1,15  | 6,85E-04 | 1,51E-02 |
| <i>MGC42367</i>        | 1,23  | 6,85E-04 | 1,51E-02 |
| <i>NPL</i>             | -1,24 | 6,86E-04 | 1,51E-02 |
| <i>THC2290002</i>      | -1,45 | 6,88E-04 | 1,51E-02 |
| <i>PPP1R15A</i>        | 1,80  | 6,89E-04 | 1,52E-02 |
| <i>ENST00000258457</i> | -1,25 | 6,93E-04 | 1,52E-02 |
| <i>JAKMIP2</i>         | -1,23 | 6,93E-04 | 1,52E-02 |
| <i>FLJ11171</i>        | -1,16 | 6,93E-04 | 1,52E-02 |
| <i>LOC340061</i>       | 1,33  | 6,94E-04 | 1,52E-02 |
| <i>HIST1H4A</i>        | 1,57  | 6,93E-04 | 1,52E-02 |
| <i>MT1G</i>            | 1,72  | 6,94E-04 | 1,52E-02 |
| <i>ENST00000343253</i> | -1,19 | 6,94E-04 | 1,52E-02 |
| <i>THC2445939</i>      | 1,26  | 6,95E-04 | 1,52E-02 |
| <i>BC032451</i>        | -2,46 | 6,98E-04 | 1,53E-02 |
| <i>ATP1A2</i>          | 1,41  | 7,01E-04 | 1,53E-02 |
| <i>SHF</i>             | -1,25 | 7,02E-04 | 1,53E-02 |
| <i>THC2394812</i>      | -1,29 | 7,03E-04 | 1,53E-02 |
| <i>ACOT7</i>           | 1,22  | 7,04E-04 | 1,54E-02 |
| <i>LOC389607</i>       | 1,36  | 7,05E-04 | 1,54E-02 |
| <i>MTERFD1</i>         | -1,15 | 7,05E-04 | 1,54E-02 |
| <i>LOC646609</i>       | 1,32  | 7,06E-04 | 1,54E-02 |
| <i>IQGAP2</i>          | 1,28  | 7,10E-04 | 1,54E-02 |
| <i>HES4</i>            | 1,27  | 7,11E-04 | 1,54E-02 |
| <i>GSTM5</i>           | -1,29 | 7,13E-04 | 1,55E-02 |
| <i>AK025613</i>        | -1,18 | 7,12E-04 | 1,55E-02 |
| <i>C1orf109</i>        | -1,16 | 7,15E-04 | 1,55E-02 |
| <i>MAP2</i>            | 1,27  | 7,16E-04 | 1,55E-02 |
| <i>DKFZp547J222</i>    | -1,22 | 7,17E-04 | 1,55E-02 |
| <i>LOC643950</i>       | 1,22  | 7,17E-04 | 1,55E-02 |
| <i>BI497361</i>        | -1,35 | 7,18E-04 | 1,55E-02 |
| <i>MT1X</i>            | 1,63  | 7,20E-04 | 1,56E-02 |
| <i>AK021531</i>        | -1,78 | 7,23E-04 | 1,56E-02 |
| <i>BC048201</i>        | -1,51 | 7,25E-04 | 1,56E-02 |
| <i>DUSP5P</i>          | -1,36 | 7,26E-04 | 1,56E-02 |
| <i>A_32_P71113</i>     | -1,21 | 7,24E-04 | 1,56E-02 |
| <i>FLT1</i>            | 1,42  | 7,23E-04 | 1,56E-02 |
| <i>XKR4</i>            | 1,46  | 7,23E-04 | 1,56E-02 |
| <i>ZNF659</i>          | 1,48  | 7,24E-04 | 1,56E-02 |
| <i>MT1L</i>            | 1,63  | 7,25E-04 | 1,56E-02 |
| <i>ATP5S</i>           | 1,12  | 7,28E-04 | 1,56E-02 |
| <i>CDKN1A</i>          | 2,49  | 7,27E-04 | 1,56E-02 |
| <i>CB529149</i>        | 1,17  | 7,29E-04 | 1,56E-02 |
| <i>VASH2</i>           | -1,30 | 7,31E-04 | 1,56E-02 |
| <i>W95609</i>          | 1,18  | 7,31E-04 | 1,56E-02 |

|                        |       |          |          |
|------------------------|-------|----------|----------|
| <i>A_23_P89841</i>     | -1,31 | 7,33E-04 | 1,57E-02 |
| <i>CA433167</i>        | -1,21 | 7,33E-04 | 1,57E-02 |
| <i>AK090670</i>        | -2,14 | 7,34E-04 | 1,57E-02 |
| <i>PDE3A</i>           | 1,45  | 7,35E-04 | 1,57E-02 |
| <i>DDX17</i>           | -1,29 | 7,39E-04 | 1,57E-02 |
| <i>ZNF228</i>          | -1,26 | 7,39E-04 | 1,57E-02 |
| <i>RNF146</i>          | -1,23 | 7,39E-04 | 1,57E-02 |
| <i>NOVA1</i>           | -1,21 | 7,40E-04 | 1,57E-02 |
| <i>ZNF278</i>          | -1,15 | 7,41E-04 | 1,57E-02 |
| <i>LAMA3</i>           | 1,17  | 7,40E-04 | 1,57E-02 |
| <i>MAP2K3</i>          | 1,33  | 7,41E-04 | 1,57E-02 |
| <i>GPR56</i>           | 1,38  | 7,39E-04 | 1,57E-02 |
| <i>KIAA0753</i>        | -1,16 | 7,42E-04 | 1,58E-02 |
| <i>DB518505</i>        | 1,44  | 7,45E-04 | 1,58E-02 |
| <i>CLIC6</i>           | 2,00  | 7,45E-04 | 1,58E-02 |
| <i>ZNF75</i>           | -1,14 | 7,48E-04 | 1,58E-02 |
| <i>AA630774</i>        | 1,18  | 7,48E-04 | 1,58E-02 |
| <i>COL4A5</i>          | -1,23 | 7,53E-04 | 1,59E-02 |
| <i>ENST00000378770</i> | 1,19  | 7,57E-04 | 1,60E-02 |
| <i>AW994273</i>        | 1,65  | 7,57E-04 | 1,60E-02 |
| <i>PI16</i>            | -1,35 | 7,60E-04 | 1,61E-02 |
| <i>ROBO1</i>           | -1,15 | 7,66E-04 | 1,62E-02 |
| <i>ZNF320</i>          | -1,16 | 7,70E-04 | 1,62E-02 |
| <i>LOC145758</i>       | -1,19 | 7,73E-04 | 1,63E-02 |
| <i>UGCG</i>            | 1,32  | 7,75E-04 | 1,63E-02 |
| <i>DPP6</i>            | -2,22 | 7,76E-04 | 1,63E-02 |
| <i>ZNF627</i>          | -1,26 | 7,77E-04 | 1,63E-02 |
| <i>GLT28D1</i>         | 1,16  | 7,77E-04 | 1,63E-02 |
| <i>AK057981</i>        | 1,19  | 7,81E-04 | 1,64E-02 |
| <i>A_24_P925559</i>    | 1,25  | 7,82E-04 | 1,64E-02 |
| <i>T15787</i>          | 1,16  | 7,82E-04 | 1,64E-02 |
| <i>AK092801</i>        | -1,21 | 7,87E-04 | 1,65E-02 |
| <i>RAC2</i>            | -1,31 | 7,91E-04 | 1,65E-02 |
| <i>THC2437822</i>      | -1,16 | 7,89E-04 | 1,65E-02 |
| <i>ENST00000335995</i> | -1,16 | 7,91E-04 | 1,65E-02 |
| <i>A_32_P142407</i>    | 1,14  | 7,89E-04 | 1,65E-02 |
| <i>THC2410705</i>      | 1,15  | 7,91E-04 | 1,65E-02 |
| <i>GNB4</i>            | 1,16  | 7,91E-04 | 1,65E-02 |
| <i>A_32_P52046</i>     | -1,14 | 7,96E-04 | 1,66E-02 |
| <i>THC2284350</i>      | -1,33 | 7,99E-04 | 1,66E-02 |
| <i>HOXA11S</i>         | -1,31 | 7,98E-04 | 1,66E-02 |
| <i>MYOZ3</i>           | -1,23 | 7,99E-04 | 1,66E-02 |
| <i>AK090405</i>        | 1,25  | 7,99E-04 | 1,66E-02 |
| <i>BM129308</i>        | 1,93  | 7,98E-04 | 1,66E-02 |

|                    |       |          |          |
|--------------------|-------|----------|----------|
| <i>FLJ16165</i>    | -1,14 | 8,00E-04 | 1,66E-02 |
| <i>POLE2</i>       | -1,18 | 8,03E-04 | 1,67E-02 |
| <i>DIDO1</i>       | -1,14 | 8,03E-04 | 1,67E-02 |
| <i>LOC284323</i>   | -1,21 | 8,04E-04 | 1,67E-02 |
| <i>VIL2</i>        | 1,36  | 8,06E-04 | 1,67E-02 |
| <i>LILRB1</i>      | -1,14 | 8,09E-04 | 1,67E-02 |
| <i>THC2346166</i>  | 1,22  | 8,09E-04 | 1,67E-02 |
| <i>SGIP1</i>       | 1,32  | 8,10E-04 | 1,67E-02 |
| <i>M87790</i>      | -3,43 | 8,10E-04 | 1,67E-02 |
| <i>AP1GBP1</i>     | -1,15 | 8,14E-04 | 1,68E-02 |
| <i>H2AFZ</i>       | 1,24  | 8,16E-04 | 1,68E-02 |
| <i>SLA</i>         | -1,29 | 8,18E-04 | 1,69E-02 |
| <i>AF086071</i>    | -1,22 | 8,18E-04 | 1,69E-02 |
| <i>AY172962</i>    | -3,45 | 8,23E-04 | 1,69E-02 |
| <i>DB341590</i>    | -1,49 | 8,20E-04 | 1,69E-02 |
| <i>THC2436370</i>  | -1,41 | 8,24E-04 | 1,69E-02 |
| <i>AK128756</i>    | -1,29 | 8,21E-04 | 1,69E-02 |
| <i>TRAIP</i>       | -1,21 | 8,23E-04 | 1,69E-02 |
| <i>PEO1</i>        | -1,20 | 8,21E-04 | 1,69E-02 |
| <i>PMS2L5</i>      | -1,16 | 8,22E-04 | 1,69E-02 |
| <i>SLITRK1</i>     | -1,13 | 8,22E-04 | 1,69E-02 |
| <i>GADD45A</i>     | 1,51  | 8,21E-04 | 1,69E-02 |
| <i>DDX28</i>       | -1,18 | 8,28E-04 | 1,69E-02 |
| <i>ZC3H10</i>      | -1,16 | 8,28E-04 | 1,69E-02 |
| <i>ZFP161</i>      | -1,16 | 8,29E-04 | 1,69E-02 |
| <i>FLJ37453</i>    | -1,15 | 8,29E-04 | 1,69E-02 |
| <i>MPI</i>         | -1,14 | 8,26E-04 | 1,69E-02 |
| <i>SFTPA1</i>      | 1,12  | 8,28E-04 | 1,69E-02 |
| <i>CHD1</i>        | 1,30  | 8,29E-04 | 1,69E-02 |
| <i>LRG1</i>        | 1,60  | 8,28E-04 | 1,69E-02 |
| <i>AK130486</i>    | -1,28 | 8,33E-04 | 1,69E-02 |
| <i>BX414807</i>    | -1,26 | 8,34E-04 | 1,69E-02 |
| <i>IHPK2</i>       | -1,22 | 8,35E-04 | 1,69E-02 |
| <i>THC2269397</i>  | -1,19 | 8,33E-04 | 1,69E-02 |
| <i>LSS</i>         | -1,18 | 8,36E-04 | 1,69E-02 |
| <i>LRIG2</i>       | -1,16 | 8,33E-04 | 1,69E-02 |
| <i>THC2404242</i>  | -1,15 | 8,35E-04 | 1,69E-02 |
| <i>PURB</i>        | 1,11  | 8,33E-04 | 1,69E-02 |
| <i>THC2348993</i>  | 1,14  | 8,36E-04 | 1,69E-02 |
| <i>DB040019</i>    | 1,15  | 8,32E-04 | 1,69E-02 |
| <i>GNG12</i>       | 1,16  | 8,35E-04 | 1,69E-02 |
| <i>BC007549</i>    | 1,46  | 8,36E-04 | 1,69E-02 |
| <i>KCTD10</i>      | 1,18  | 8,39E-04 | 1,69E-02 |
| <i>A_32_P86616</i> | 1,18  | 8,39E-04 | 1,69E-02 |

|                        |       |          |          |
|------------------------|-------|----------|----------|
| <i>EBI2</i>            | 1,63  | 8,39E-04 | 1,69E-02 |
| <i>RARG</i>            | -1,21 | 8,40E-04 | 1,69E-02 |
| <i>DLEC1</i>           | -1,11 | 8,41E-04 | 1,69E-02 |
| <i>BM697215</i>        | 1,33  | 8,42E-04 | 1,69E-02 |
| <i>ENST00000228360</i> | -1,37 | 8,45E-04 | 1,70E-02 |
| <i>PHACS</i>           | -1,22 | 8,45E-04 | 1,70E-02 |
| <i>PPP6C</i>           | 1,11  | 8,44E-04 | 1,70E-02 |
| <i>LPGAT1</i>          | 1,19  | 8,45E-04 | 1,70E-02 |
| <i>THC2440022</i>      | -1,24 | 8,46E-04 | 1,70E-02 |
| <i>ENST00000360514</i> | -1,20 | 8,47E-04 | 1,70E-02 |
| <i>AK094334</i>        | -1,19 | 8,47E-04 | 1,70E-02 |
| <i>ANK1</i>            | 1,23  | 8,48E-04 | 1,70E-02 |
| <i>C6orf154</i>        | -1,28 | 8,51E-04 | 1,70E-02 |
| <i>RP11-301117.1</i>   | -1,27 | 8,50E-04 | 1,70E-02 |
| <i>A_24_P488510</i>    | -1,25 | 8,51E-04 | 1,70E-02 |
| <i>IGKC</i>            | -2,29 | 8,55E-04 | 1,70E-02 |
| <i>AY358815</i>        | -1,47 | 8,54E-04 | 1,70E-02 |
| <i>THC2379201</i>      | -1,40 | 8,56E-04 | 1,70E-02 |
| <i>THC2411485</i>      | -1,29 | 8,55E-04 | 1,70E-02 |
| <i>ZC3H12D</i>         | -1,20 | 8,56E-04 | 1,70E-02 |
| <i>BC028243</i>        | -1,17 | 8,53E-04 | 1,70E-02 |
| <i>SIN3B</i>           | 1,19  | 8,56E-04 | 1,70E-02 |
| <i>PRRX1</i>           | 1,27  | 8,54E-04 | 1,70E-02 |
| <i>SOX7</i>            | 1,35  | 8,57E-04 | 1,70E-02 |
| <i>AK124698</i>        | 1,61  | 8,57E-04 | 1,70E-02 |
| <i>COX7A1</i>          | 1,23  | 8,59E-04 | 1,70E-02 |
| <i>HIP1</i>            | 1,24  | 8,59E-04 | 1,70E-02 |
| <i>THC2377845</i>      | 1,38  | 8,59E-04 | 1,70E-02 |
| <i>C10orf84</i>        | 1,13  | 8,61E-04 | 1,71E-02 |
| <i>FAT</i>             | 1,17  | 8,62E-04 | 1,71E-02 |
| <i>PLEKHQ1</i>         | 1,34  | 8,63E-04 | 1,71E-02 |
| <i>NNMT</i>            | 1,79  | 8,63E-04 | 1,71E-02 |
| <i>JARID1B</i>         | -1,10 | 8,69E-04 | 1,72E-02 |
| <i>A_32_P32923</i>     | 1,13  | 8,69E-04 | 1,72E-02 |
| <i>CCDC41</i>          | -1,16 | 8,71E-04 | 1,72E-02 |
| <i>A_32_P28528</i>     | 1,12  | 8,71E-04 | 1,72E-02 |
| <i>GLUD1</i>           | 1,17  | 8,72E-04 | 1,72E-02 |
| <i>A_32_P42666</i>     | -1,34 | 8,73E-04 | 1,72E-02 |
| <i>C12orf49</i>        | 1,11  | 8,74E-04 | 1,72E-02 |
| <i>ACBD5</i>           | 1,19  | 8,74E-04 | 1,72E-02 |
| <i>CR601496</i>        | -1,27 | 8,80E-04 | 1,73E-02 |
| <i>THC2282954</i>      | -1,45 | 8,81E-04 | 1,73E-02 |
| <i>CR624880</i>        | -1,17 | 8,84E-04 | 1,73E-02 |
| <i>GCM1</i>            | 1,13  | 8,84E-04 | 1,73E-02 |

|                        |       |          |          |
|------------------------|-------|----------|----------|
| <i>NRXN2</i>           | -1,32 | 8,85E-04 | 1,74E-02 |
| <i>ARL5B</i>           | 1,46  | 8,85E-04 | 1,74E-02 |
| <i>CRYGS</i>           | -1,26 | 8,90E-04 | 1,74E-02 |
| <i>ZNF17</i>           | -1,17 | 8,90E-04 | 1,74E-02 |
| <i>SETMAR</i>          | -1,17 | 8,90E-04 | 1,74E-02 |
| <i>HMCN2</i>           | 1,32  | 8,89E-04 | 1,74E-02 |
| <i>FRYL</i>            | 1,13  | 8,92E-04 | 1,74E-02 |
| <i>MGC15634</i>        | -1,17 | 8,93E-04 | 1,74E-02 |
| <i>ENST00000328046</i> | 1,31  | 8,93E-04 | 1,74E-02 |
| <i>ENST00000375280</i> | -1,35 | 8,98E-04 | 1,75E-02 |
| <i>CSTF1</i>           | -1,14 | 8,98E-04 | 1,75E-02 |
| <i>WNT9A</i>           | -1,13 | 8,98E-04 | 1,75E-02 |
| <i>ACOT9</i>           | 1,15  | 8,97E-04 | 1,75E-02 |
| <i>TMEM8</i>           | 1,17  | 9,00E-04 | 1,75E-02 |
| <i>PTPN21</i>          | 1,22  | 9,03E-04 | 1,75E-02 |
| <i>HNT</i>             | 1,32  | 9,03E-04 | 1,75E-02 |
| <i>ANXA1</i>           | 1,34  | 9,03E-04 | 1,75E-02 |
| <i>SSH1</i>            | 1,28  | 9,05E-04 | 1,76E-02 |
| <i>RAB12</i>           | 1,14  | 9,06E-04 | 1,76E-02 |
| <i>HTR1E</i>           | -1,32 | 9,07E-04 | 1,76E-02 |
| <i>LOC115648</i>       | -1,18 | 9,10E-04 | 1,76E-02 |
| <i>RNF150</i>          | -1,40 | 9,13E-04 | 1,76E-02 |
| <i>PITPNB</i>          | 1,18  | 9,13E-04 | 1,76E-02 |
| <i>IBRDC3</i>          | 1,35  | 9,13E-04 | 1,76E-02 |
| <i>DNMBP</i>           | -1,16 | 9,13E-04 | 1,76E-02 |
| <i>AK125221</i>        | -1,42 | 9,17E-04 | 1,77E-02 |
| <i>LOC150223</i>       | -1,10 | 9,19E-04 | 1,77E-02 |
| <i>PIK3R1</i>          | -1,34 | 9,20E-04 | 1,77E-02 |
| <i>SYNGR1</i>          | -1,24 | 9,24E-04 | 1,78E-02 |
| <i>IQCF2</i>           | -1,16 | 9,24E-04 | 1,78E-02 |
| <i>CR620977</i>        | -1,31 | 9,25E-04 | 1,78E-02 |
| <i>C12orf35</i>        | -1,24 | 9,26E-04 | 1,78E-02 |
| <i>AF136408</i>        | -1,20 | 9,26E-04 | 1,78E-02 |
| <i>CR593388</i>        | 1,34  | 9,26E-04 | 1,78E-02 |
| <i>OLIG3</i>           | -1,15 | 9,27E-04 | 1,78E-02 |
| <i>PLEKHB2</i>         | 1,14  | 9,28E-04 | 1,78E-02 |
| <i>ZNF365</i>          | 1,35  | 9,29E-04 | 1,78E-02 |
| <i>CEBPD</i>           | 2,23  | 9,30E-04 | 1,78E-02 |
| <i>NAT9</i>            | -1,12 | 9,32E-04 | 1,78E-02 |
| <i>BX433326</i>        | 1,22  | 9,32E-04 | 1,78E-02 |
| <i>CEP135</i>          | -1,14 | 9,36E-04 | 1,79E-02 |
| <i>AK023907</i>        | -1,21 | 9,37E-04 | 1,79E-02 |
| <i>KIAA0859</i>        | -1,15 | 9,39E-04 | 1,79E-02 |
| <i>MAP1D</i>           | 1,12  | 9,39E-04 | 1,79E-02 |

|                        |       |          |          |
|------------------------|-------|----------|----------|
| <i>ENST00000263997</i> | -1,15 | 9,42E-04 | 1,80E-02 |
| <i>VGF</i>             | 1,13  | 9,49E-04 | 1,81E-02 |
| <i>MNAB</i>            | 1,11  | 9,50E-04 | 1,81E-02 |
| <i>ENST00000374189</i> | 1,16  | 9,50E-04 | 1,81E-02 |
| <i>THC2381800</i>      | -1,37 | 9,54E-04 | 1,82E-02 |
| <i>LOC643336</i>       | 1,22  | 9,54E-04 | 1,82E-02 |
| <i>SUHW4</i>           | -1,30 | 9,57E-04 | 1,82E-02 |
| <i>C10orf6</i>         | -1,17 | 9,58E-04 | 1,82E-02 |
| <i>X58809</i>          | -1,16 | 9,56E-04 | 1,82E-02 |
| <i>CCNT1</i>           | 1,15  | 9,56E-04 | 1,82E-02 |
| <i>SENP5</i>           | 1,16  | 9,58E-04 | 1,82E-02 |
| <i>ZBTB10</i>          | 1,17  | 9,58E-04 | 1,82E-02 |
| <i>BQ130701</i>        | 1,32  | 9,64E-04 | 1,83E-02 |
| <i>CARS</i>            | 1,13  | 9,66E-04 | 1,83E-02 |
| <i>A_24_P783433</i>    | -1,18 | 9,68E-04 | 1,83E-02 |
| <i>A_24_P255123</i>    | 1,25  | 9,68E-04 | 1,83E-02 |
| <i>ZNF646</i>          | -1,15 | 9,69E-04 | 1,83E-02 |
| <i>THC2416695</i>      | -1,19 | 9,71E-04 | 1,83E-02 |
| <i>KIAA1549</i>        | -1,17 | 9,71E-04 | 1,83E-02 |
| <i>SNX7</i>            | 1,12  | 9,71E-04 | 1,83E-02 |
| <i>CSF2RB</i>          | 1,15  | 9,72E-04 | 1,83E-02 |
| <i>A_24_P358305</i>    | 1,37  | 9,72E-04 | 1,83E-02 |
| <i>HPS3</i>            | -1,17 | 9,73E-04 | 1,83E-02 |
| <i>CH25H</i>           | 3,49  | 9,74E-04 | 1,83E-02 |
| <i>A_23_P403836</i>    | 1,32  | 9,77E-04 | 1,84E-02 |
| <i>A_24_P796274</i>    | 1,20  | 9,81E-04 | 1,84E-02 |
| <i>ENST00000307840</i> | -2,29 | 9,84E-04 | 1,85E-02 |
| <i>ENST00000383706</i> | 2,50  | 9,83E-04 | 1,85E-02 |
| <i>PLXDC1</i>          | 1,38  | 9,85E-04 | 1,85E-02 |
| <i>MAPKAPK2</i>        | 1,16  | 9,91E-04 | 1,86E-02 |
| <i>JUB</i>             | -1,25 | 9,93E-04 | 1,86E-02 |
| <i>CXorf9</i>          | -1,21 | 9,93E-04 | 1,86E-02 |
| <i>ENST00000331696</i> | -2,72 | 9,96E-04 | 1,86E-02 |
| <i>GENX-3414</i>       | 1,26  | 9,97E-04 | 1,87E-02 |
| <i>SLAMF7</i>          | -1,69 | 1,00E-03 | 1,87E-02 |
| <i>ZNF366</i>          | -1,26 | 9,99E-04 | 1,87E-02 |
| <i>GRRP1</i>           | 1,50  | 1,00E-03 | 1,87E-02 |
| <i>CDH19</i>           | 1,74  | 9,98E-04 | 1,87E-02 |
| <i>BC031319</i>        | 1,84  | 1,00E-03 | 1,87E-02 |
| <i>AA987359</i>        | 1,13  | 1,00E-03 | 1,87E-02 |
| <i>ODC1</i>            | 1,27  | 1,00E-03 | 1,87E-02 |
| <i>SFRP1</i>           | -1,50 | 1,01E-03 | 1,88E-02 |
| <i>THC2401493</i>      | -1,41 | 1,01E-03 | 1,88E-02 |
| <i>THC2301409</i>      | -1,26 | 1,01E-03 | 1,88E-02 |

|                        |       |          |          |
|------------------------|-------|----------|----------|
| <i>PCBD2</i>           | -1,16 | 1,01E-03 | 1,88E-02 |
| <i>GK</i>              | 1,14  | 1,01E-03 | 1,88E-02 |
| <i>TPM3</i>            | 1,22  | 1,01E-03 | 1,88E-02 |
| <i>THC2289574</i>      | -1,26 | 1,01E-03 | 1,88E-02 |
| <i>CSH1</i>            | 1,26  | 1,01E-03 | 1,88E-02 |
| <i>ENST00000380632</i> | -1,36 | 1,02E-03 | 1,88E-02 |
| <i>RAI1</i>            | -1,23 | 1,01E-03 | 1,88E-02 |
| <i>AA601902</i>        | -1,22 | 1,02E-03 | 1,88E-02 |
| <i>AF118079</i>        | -1,19 | 1,02E-03 | 1,88E-02 |
| <i>PTPN1</i>           | 1,17  | 1,02E-03 | 1,88E-02 |
| <i>C8orf79</i>         | 1,14  | 1,02E-03 | 1,88E-02 |
| <i>TAS2R5</i>          | -1,18 | 1,02E-03 | 1,88E-02 |
| <i>THC2406011</i>      | 1,48  | 1,02E-03 | 1,88E-02 |
| <i>THC2437154</i>      | -1,20 | 1,02E-03 | 1,88E-02 |
| <i>PKD1L1</i>          | 1,14  | 1,02E-03 | 1,88E-02 |
| <i>FLJ46385</i>        | -1,18 | 1,02E-03 | 1,89E-02 |
| <i>ENST00000297035</i> | -1,18 | 1,03E-03 | 1,89E-02 |
| <i>ENST00000374558</i> | -1,18 | 1,03E-03 | 1,89E-02 |
| <i>LRRRC8B</i>         | 1,20  | 1,03E-03 | 1,89E-02 |
| <i>TRPC3</i>           | 1,43  | 1,03E-03 | 1,89E-02 |
| <i>THC2329253</i>      | -1,22 | 1,03E-03 | 1,89E-02 |
| <i>THC2342255</i>      | -1,18 | 1,03E-03 | 1,89E-02 |
| <i>CR612225</i>        | -1,12 | 1,03E-03 | 1,89E-02 |
| <i>AI961400</i>        | 1,09  | 1,03E-03 | 1,89E-02 |
| <i>NXT1</i>            | 1,27  | 1,03E-03 | 1,89E-02 |
| <i>AK057710</i>        | -1,19 | 1,03E-03 | 1,89E-02 |
| <i>A_23_P115902</i>    | -1,29 | 1,04E-03 | 1,89E-02 |
| <i>FLJ34503</i>        | -1,47 | 1,04E-03 | 1,90E-02 |
| <i>PAR6A</i>           | 1,20  | 1,04E-03 | 1,90E-02 |
| <i>RRAS2</i>           | 1,16  | 1,04E-03 | 1,90E-02 |
| <i>UBE2S</i>           | 1,20  | 1,04E-03 | 1,90E-02 |
| <i>MAP3K14</i>         | 1,20  | 1,04E-03 | 1,90E-02 |
| <i>THC2376063</i>      | -1,29 | 1,04E-03 | 1,90E-02 |
| <i>FBLN1</i>           | -1,32 | 1,05E-03 | 1,91E-02 |
| <i>AK022268</i>        | -1,28 | 1,05E-03 | 1,91E-02 |
| <i>ANGEL2</i>          | -1,16 | 1,05E-03 | 1,91E-02 |
| <i>HGF</i>             | 1,15  | 1,05E-03 | 1,91E-02 |
| <i>PNPLA8</i>          | 1,20  | 1,05E-03 | 1,91E-02 |
| <i>DDX3Y</i>           | 1,20  | 1,05E-03 | 1,91E-02 |
| <i>KRTAP4-14</i>       | 1,19  | 1,05E-03 | 1,91E-02 |
| <i>ENST00000377226</i> | -2,11 | 1,05E-03 | 1,91E-02 |
| <i>A_24_P914095</i>    | -1,18 | 1,05E-03 | 1,91E-02 |
| <i>LOC150383</i>       | -1,17 | 1,06E-03 | 1,91E-02 |
| <i>AF119906</i>        | 1,13  | 1,05E-03 | 1,91E-02 |



|                        |       |          |          |
|------------------------|-------|----------|----------|
| <i>BHLHB2</i>          | 1,72  | 1,06E-03 | 1,91E-02 |
| <i>THC2405936</i>      | -1,32 | 1,06E-03 | 1,91E-02 |
| <i>THC2413036</i>      | -1,30 | 1,06E-03 | 1,91E-02 |
| <i>MGC13379</i>        | -1,17 | 1,06E-03 | 1,91E-02 |
| <i>THC2338704</i>      | -1,11 | 1,06E-03 | 1,91E-02 |
| <i>THC2408432</i>      | -1,19 | 1,07E-03 | 1,92E-02 |
| <i>LOC113444</i>       | 1,16  | 1,07E-03 | 1,92E-02 |
| <i>CR619760</i>        | -1,25 | 1,07E-03 | 1,94E-02 |
| <i>AK124956</i>        | -1,16 | 1,07E-03 | 1,94E-02 |
| <i>GINS2</i>           | -1,19 | 1,08E-03 | 1,94E-02 |
| <i>BTC</i>             | 1,37  | 1,08E-03 | 1,94E-02 |
| <i>ENST00000366971</i> | -1,18 | 1,08E-03 | 1,94E-02 |
| <i>LOC285033</i>       | -1,13 | 1,08E-03 | 1,94E-02 |
| <i>NTN2L</i>           | 1,13  | 1,08E-03 | 1,94E-02 |
| <i>REEP3</i>           | 1,21  | 1,08E-03 | 1,95E-02 |
| <i>LIMD2</i>           | -1,16 | 1,09E-03 | 1,95E-02 |
| <i>ENST00000304389</i> | -1,18 | 1,09E-03 | 1,95E-02 |
| <i>A_24_P490109</i>    | -2,39 | 1,09E-03 | 1,95E-02 |
| <i>AK057725</i>        | -1,18 | 1,09E-03 | 1,95E-02 |
| <i>MTHFSD</i>          | -1,11 | 1,09E-03 | 1,95E-02 |
| <i>AW389821</i>        | -1,39 | 1,10E-03 | 1,96E-02 |
| <i>BC008476</i>        | -1,27 | 1,10E-03 | 1,96E-02 |
| <i>GLCCI1</i>          | -1,28 | 1,10E-03 | 1,96E-02 |
| <i>SLC22A5</i>         | -1,22 | 1,10E-03 | 1,96E-02 |
| <i>AA707467</i>        | 1,19  | 1,10E-03 | 1,96E-02 |
| <i>COCH</i>            | 1,75  | 1,10E-03 | 1,96E-02 |
| <i>LOC400657</i>       | -1,24 | 1,10E-03 | 1,96E-02 |
| <i>ITPKC</i>           | 1,84  | 1,10E-03 | 1,96E-02 |
| <i>MGC27121</i>        | -1,13 | 1,10E-03 | 1,96E-02 |
| <i>LOC129530</i>       | -1,18 | 1,10E-03 | 1,96E-02 |
| <i>H40632</i>          | 1,18  | 1,11E-03 | 1,97E-02 |
| <i>CR614418</i>        | 1,14  | 1,11E-03 | 1,97E-02 |
| <i>ZNF425</i>          | -1,24 | 1,11E-03 | 1,97E-02 |
| <i>MESDC1</i>          | 1,21  | 1,11E-03 | 1,97E-02 |
| <i>AA585242</i>        | -1,23 | 1,12E-03 | 1,98E-02 |
| <i>CR590623</i>        | 1,19  | 1,12E-03 | 1,98E-02 |
| <i>HCCA2</i>           | 1,23  | 1,12E-03 | 1,98E-02 |
| <i>NSUN5B</i>          | -1,20 | 1,12E-03 | 1,98E-02 |
| <i>CF529682</i>        | 1,23  | 1,12E-03 | 1,98E-02 |
| <i>PTGS2</i>           | 1,93  | 1,12E-03 | 1,98E-02 |
| <i>DAG1</i>            | 1,15  | 1,12E-03 | 1,98E-02 |
| <i>DDX59</i>           | 1,15  | 1,12E-03 | 1,98E-02 |
| <i>BX114143</i>        | 1,46  | 1,12E-03 | 1,98E-02 |
| <i>AK130896</i>        | -1,51 | 1,13E-03 | 1,99E-02 |

|                        |       |          |          |
|------------------------|-------|----------|----------|
| <i>LOC442245</i>       | -1,18 | 1,13E-03 | 1,99E-02 |
| <i>HPS4</i>            | -1,14 | 1,13E-03 | 1,99E-02 |
| <i>THC2436602</i>      | -1,13 | 1,13E-03 | 1,99E-02 |
| <i>MT1A</i>            | 1,49  | 1,13E-03 | 1,99E-02 |
| <i>HAND2</i>           | -1,47 | 1,13E-03 | 1,99E-02 |
| <i>THC2368606</i>      | -1,22 | 1,13E-03 | 1,99E-02 |
| <i>FLJ12700</i>        | -1,21 | 1,13E-03 | 2,00E-02 |
| <i>WDR85</i>           | -1,13 | 1,14E-03 | 2,00E-02 |
| <i>DDX5</i>            | 1,20  | 1,14E-03 | 2,01E-02 |
| <i>ENST00000359488</i> | -2,35 | 1,14E-03 | 2,01E-02 |
| <i>RWDD3</i>           | -1,15 | 1,15E-03 | 2,01E-02 |
| <i>MT1F</i>            | 1,27  | 1,15E-03 | 2,01E-02 |
| <i>ENST00000373264</i> | 1,19  | 1,15E-03 | 2,02E-02 |
| <i>THC2425726</i>      | -1,37 | 1,15E-03 | 2,02E-02 |
| <i>PDDC1</i>           | -1,19 | 1,16E-03 | 2,02E-02 |
| <i>LRRC33</i>          | -1,15 | 1,16E-03 | 2,02E-02 |
| <i>ZNF697</i>          | -1,11 | 1,16E-03 | 2,02E-02 |
| <i>ENST00000373316</i> | 1,18  | 1,16E-03 | 2,02E-02 |
| <i>PTP4A3</i>          | 1,37  | 1,16E-03 | 2,02E-02 |
| <i>SOCS4</i>           | 1,13  | 1,16E-03 | 2,03E-02 |
| <i>GAST</i>            | 1,16  | 1,17E-03 | 2,04E-02 |
| <i>RNF4</i>            | -1,13 | 1,17E-03 | 2,04E-02 |
| <i>RELA</i>            | 1,14  | 1,17E-03 | 2,04E-02 |
| <i>THC2343551</i>      | -1,20 | 1,17E-03 | 2,04E-02 |
| <i>DQ145726</i>        | -1,17 | 1,18E-03 | 2,06E-02 |
| <i>MTX1</i>            | 1,15  | 1,18E-03 | 2,06E-02 |
| <i>GPR176</i>          | 1,17  | 1,18E-03 | 2,06E-02 |
| <i>SUZ12P</i>          | -1,24 | 1,18E-03 | 2,06E-02 |
| <i>BC004287</i>        | -1,26 | 1,19E-03 | 2,06E-02 |
| <i>BX104493</i>        | -1,25 | 1,19E-03 | 2,06E-02 |
| <i>CR626252</i>        | 1,16  | 1,19E-03 | 2,06E-02 |
| <i>ETV3</i>            | 1,17  | 1,19E-03 | 2,06E-02 |
| <i>PCDH19</i>          | 1,22  | 1,19E-03 | 2,06E-02 |
| <i>THC2434739</i>      | -1,28 | 1,19E-03 | 2,06E-02 |
| <i>DKFZP564J0863</i>   | 1,19  | 1,19E-03 | 2,06E-02 |
| <i>ZNF267</i>          | 1,36  | 1,19E-03 | 2,06E-02 |
| <i>AK024933</i>        | -1,44 | 1,20E-03 | 2,07E-02 |
| <i>THC2334370</i>      | -1,34 | 1,20E-03 | 2,07E-02 |
| <i>AGTRL1</i>          | 1,18  | 1,20E-03 | 2,07E-02 |
| <i>DIRAS3</i>          | 1,82  | 1,20E-03 | 2,07E-02 |
| <i>LOC202181</i>       | -1,35 | 1,20E-03 | 2,08E-02 |
| <i>PCDHA9</i>          | -1,16 | 1,20E-03 | 2,08E-02 |
| <i>ZNF187</i>          | -1,14 | 1,20E-03 | 2,08E-02 |
| <i>BMX</i>             | 1,41  | 1,21E-03 | 2,09E-02 |

|                        |       |          |          |
|------------------------|-------|----------|----------|
| <i>MNAT1</i>           | 1,15  | 1,22E-03 | 2,09E-02 |
| <i>C6orf141</i>        | -1,30 | 1,22E-03 | 2,09E-02 |
| <i>TCL1B</i>           | -1,18 | 1,22E-03 | 2,09E-02 |
| <i>ZBTB6</i>           | -1,14 | 1,22E-03 | 2,10E-02 |
| <i>AA897233</i>        | -1,12 | 1,22E-03 | 2,10E-02 |
| <i>TMC8</i>            | -1,24 | 1,23E-03 | 2,10E-02 |
| <i>ENST00000378887</i> | -1,18 | 1,23E-03 | 2,10E-02 |
| <i>STOM</i>            | 1,17  | 1,23E-03 | 2,11E-02 |
| <i>TNFRSF10B</i>       | 1,32  | 1,23E-03 | 2,11E-02 |
| <i>AW136683</i>        | -2,36 | 1,23E-03 | 2,11E-02 |
| <i>THC2375008</i>      | -1,29 | 1,23E-03 | 2,11E-02 |
| <i>THC2437969</i>      | -1,30 | 1,24E-03 | 2,12E-02 |
| <i>ENST00000371242</i> | -1,29 | 1,24E-03 | 2,12E-02 |
| <i>CR610885</i>        | -1,22 | 1,24E-03 | 2,12E-02 |
| <i>ZBED3</i>           | -1,25 | 1,24E-03 | 2,13E-02 |
| <i>FLJ20758</i>        | -1,14 | 1,25E-03 | 2,13E-02 |
| <i>THC2280139</i>      | -1,21 | 1,25E-03 | 2,13E-02 |
| <i>CDC42</i>           | 1,12  | 1,25E-03 | 2,13E-02 |
| <i>FABP4</i>           | -1,36 | 1,25E-03 | 2,13E-02 |
| <i>PTCD1</i>           | -1,20 | 1,25E-03 | 2,13E-02 |
| <i>FLJ25084</i>        | -1,15 | 1,25E-03 | 2,13E-02 |
| <i>ENST00000369239</i> | -1,29 | 1,26E-03 | 2,14E-02 |
| <i>SELE</i>            | 3,51  | 1,26E-03 | 2,14E-02 |
| <i>SLC22A2</i>         | 1,14  | 1,26E-03 | 2,14E-02 |
| <i>THC2279933</i>      | -1,18 | 1,26E-03 | 2,14E-02 |
| <i>C6orf128</i>        | 1,16  | 1,26E-03 | 2,14E-02 |
| <i>NTN4</i>            | 1,30  | 1,26E-03 | 2,14E-02 |
| <i>DGKG</i>            | 1,31  | 1,26E-03 | 2,14E-02 |
| <i>AK129542</i>        | 1,12  | 1,27E-03 | 2,15E-02 |
| <i>HEATR3</i>          | -1,18 | 1,27E-03 | 2,15E-02 |
| <i>A_32_P215745</i>    | 1,25  | 1,27E-03 | 2,16E-02 |
| <i>AK023159</i>        | -1,30 | 1,28E-03 | 2,17E-02 |
| <i>AT_nC_3</i>         | 1,12  | 1,28E-03 | 2,17E-02 |
| <i>THC2340489</i>      | -1,30 | 1,29E-03 | 2,17E-02 |
| <i>THC2306718</i>      | -1,25 | 1,29E-03 | 2,17E-02 |
| <i>THC2366654</i>      | -1,17 | 1,29E-03 | 2,17E-02 |
| <i>AA912913</i>        | -1,13 | 1,28E-03 | 2,17E-02 |
| <i>MT1E</i>            | 1,48  | 1,29E-03 | 2,17E-02 |
| <i>CCNL1</i>           | 1,58  | 1,29E-03 | 2,17E-02 |
| <i>LDLR</i>            | 2,19  | 1,28E-03 | 2,17E-02 |
| <i>TADA1L</i>          | -1,25 | 1,29E-03 | 2,17E-02 |
| <i>RBM21</i>           | -1,12 | 1,29E-03 | 2,17E-02 |
| <i>FAM53C</i>          | 1,19  | 1,29E-03 | 2,18E-02 |
| <i>KIAA0256</i>        | 1,18  | 1,30E-03 | 2,18E-02 |

|                        |       |          |          |
|------------------------|-------|----------|----------|
| <i>ENST00000295199</i> | 1,12  | 1,30E-03 | 2,18E-02 |
| <i>THC2346734</i>      | 1,28  | 1,30E-03 | 2,18E-02 |
| <i>REV3L</i>           | -1,39 | 1,31E-03 | 2,19E-02 |
| <i>FMO5</i>            | 1,13  | 1,31E-03 | 2,19E-02 |
| <i>ENST00000354743</i> | 1,09  | 1,31E-03 | 2,20E-02 |
| <i>ATP1B3</i>          | 1,23  | 1,31E-03 | 2,20E-02 |
| <i>CDCA4</i>           | -1,11 | 1,31E-03 | 2,20E-02 |
| <i>BCL2L13</i>         | 1,17  | 1,31E-03 | 2,20E-02 |
| <i>TSPAN5</i>          | -1,19 | 1,32E-03 | 2,20E-02 |
| <i>ARL4D</i>           | -1,36 | 1,32E-03 | 2,20E-02 |
| <i>GBP2</i>            | 1,21  | 1,32E-03 | 2,20E-02 |
| <i>ANK2</i>            | 1,28  | 1,32E-03 | 2,20E-02 |
| <i>CA438288</i>        | -1,12 | 1,33E-03 | 2,22E-02 |
| <i>C10orf57</i>        | -1,20 | 1,33E-03 | 2,22E-02 |
| <i>A_24_P24332</i>     | 1,20  | 1,33E-03 | 2,22E-02 |
| <i>THC2252089</i>      | -1,20 | 1,33E-03 | 2,22E-02 |
| <i>XCL2</i>            | -1,41 | 1,33E-03 | 2,23E-02 |
| <i>ENST00000313153</i> | -1,12 | 1,34E-03 | 2,23E-02 |
| <i>THC2335499</i>      | -1,13 | 1,34E-03 | 2,23E-02 |
| <i>BC008846</i>        | -1,12 | 1,34E-03 | 2,23E-02 |
| <i>QTRTD1</i>          | -1,16 | 1,34E-03 | 2,23E-02 |
| <i>WBSCR18</i>         | -1,13 | 1,34E-03 | 2,23E-02 |
| <i>CCR2</i>            | -1,46 | 1,34E-03 | 2,23E-02 |
| <i>GPR4</i>            | 1,45  | 1,35E-03 | 2,24E-02 |
| <i>A_24_P933173</i>    | -1,20 | 1,35E-03 | 2,24E-02 |
| <i>C8orf59</i>         | -1,31 | 1,35E-03 | 2,25E-02 |
| <i>CD743044</i>        | 1,36  | 1,36E-03 | 2,25E-02 |
| <i>THC2283842</i>      | 1,53  | 1,36E-03 | 2,25E-02 |
| <i>PLAUR</i>           | 1,61  | 1,36E-03 | 2,25E-02 |
| <i>FLJ22639</i>        | -1,28 | 1,36E-03 | 2,25E-02 |
| <i>C14orf101</i>       | -1,16 | 1,36E-03 | 2,25E-02 |
| <i>THC2449703</i>      | -1,24 | 1,36E-03 | 2,26E-02 |
| <i>AI791206</i>        | -1,52 | 1,37E-03 | 2,26E-02 |
| <i>MSX1</i>            | -1,34 | 1,37E-03 | 2,26E-02 |
| <i>AK125077</i>        | -1,20 | 1,37E-03 | 2,26E-02 |
| <i>THC2367825</i>      | -1,11 | 1,37E-03 | 2,26E-02 |
| <i>SUSD3</i>           | -1,60 | 1,37E-03 | 2,26E-02 |
| <i>PDIK1L</i>          | -1,24 | 1,37E-03 | 2,26E-02 |
| <i>NUP43</i>           | -1,22 | 1,37E-03 | 2,26E-02 |
| <i>DENND4A</i>         | 1,15  | 1,37E-03 | 2,26E-02 |
| <i>BET1</i>            | -1,23 | 1,38E-03 | 2,26E-02 |
| <i>CCDC14</i>          | -1,16 | 1,38E-03 | 2,27E-02 |
| <i>ZNF700</i>          | -1,13 | 1,38E-03 | 2,27E-02 |
| <i>CCRN4L</i>          | 1,39  | 1,38E-03 | 2,27E-02 |

|                        |       |          |          |
|------------------------|-------|----------|----------|
| <i>ENST00000310579</i> | -2,42 | 1,38E-03 | 2,27E-02 |
| <i>FASLG</i>           | -1,27 | 1,38E-03 | 2,27E-02 |
| <i>DHRS9</i>           | -1,37 | 1,39E-03 | 2,29E-02 |
| <i>LIPT1</i>           | -1,23 | 1,39E-03 | 2,29E-02 |
| <i>A_32_P80587</i>     | -1,45 | 1,40E-03 | 2,29E-02 |
| <i>THC2437476</i>      | -1,34 | 1,40E-03 | 2,29E-02 |
| <i>THC2374166</i>      | -1,33 | 1,40E-03 | 2,29E-02 |
| <i>THC2304875</i>      | -1,21 | 1,40E-03 | 2,29E-02 |
| <i>ENST00000361390</i> | 1,20  | 1,40E-03 | 2,29E-02 |
| <i>SLC22A4</i>         | 1,49  | 1,40E-03 | 2,29E-02 |
| <i>THC2426708</i>      | -1,20 | 1,40E-03 | 2,29E-02 |
| <i>AF085920</i>        | 1,20  | 1,40E-03 | 2,29E-02 |
| <i>GEMIN4</i>          | -1,17 | 1,41E-03 | 2,30E-02 |
| <i>THC2340838</i>      | -1,16 | 1,41E-03 | 2,30E-02 |
| <i>BU632168</i>        | 1,15  | 1,41E-03 | 2,30E-02 |
| <i>GPAM</i>            | -1,22 | 1,41E-03 | 2,30E-02 |
| <i>TSPAN6</i>          | -1,30 | 1,41E-03 | 2,30E-02 |
| <i>PKNOX1</i>          | -1,15 | 1,42E-03 | 2,31E-02 |
| <i>THC2442515</i>      | -1,13 | 1,42E-03 | 2,31E-02 |
| <i>TCEB1</i>           | 1,18  | 1,42E-03 | 2,31E-02 |
| <i>CTSW</i>            | -1,20 | 1,42E-03 | 2,31E-02 |
| <i>THC2354953</i>      | -1,16 | 1,43E-03 | 2,32E-02 |
| <i>LOC339229</i>       | -1,14 | 1,43E-03 | 2,32E-02 |
| <i>A_24_P713893</i>    | 1,16  | 1,43E-03 | 2,33E-02 |
| <i>CREB3L2</i>         | 1,19  | 1,43E-03 | 2,33E-02 |
| <i>TUBB6</i>           | 1,28  | 1,44E-03 | 2,33E-02 |
| <i>OK/SW-CL.89</i>     | -1,17 | 1,44E-03 | 2,34E-02 |
| <i>PNOC</i>            | -1,24 | 1,44E-03 | 2,34E-02 |
| <i>SKI</i>             | 1,36  | 1,44E-03 | 2,34E-02 |
| <i>BC092503</i>        | 1,18  | 1,45E-03 | 2,34E-02 |
| <i>THBS4</i>           | 1,93  | 1,45E-03 | 2,34E-02 |
| <i>ENST00000380410</i> | -1,16 | 1,45E-03 | 2,35E-02 |
| <i>THC2294276</i>      | -1,25 | 1,47E-03 | 2,37E-02 |
| <i>C12orf44</i>        | 1,20  | 1,47E-03 | 2,37E-02 |
| <i>MT1JP</i>           | 1,85  | 1,47E-03 | 2,37E-02 |
| <i>AF075045</i>        | -1,17 | 1,47E-03 | 2,37E-02 |
| <i>BLCAP</i>           | -1,16 | 1,47E-03 | 2,37E-02 |
| <i>RASGEF1B</i>        | 1,22  | 1,47E-03 | 2,37E-02 |
| <i>THC2439611</i>      | -1,18 | 1,48E-03 | 2,38E-02 |
| <i>FLJ22374</i>        | 1,15  | 1,48E-03 | 2,38E-02 |
| <i>IER5</i>            | 1,23  | 1,48E-03 | 2,38E-02 |
| <i>CRISPLD2</i>        | 1,42  | 1,48E-03 | 2,38E-02 |
| <i>EFNA4</i>           | -1,19 | 1,48E-03 | 2,38E-02 |
| <i>ANKS3</i>           | -1,12 | 1,48E-03 | 2,38E-02 |

|                        |       |          |          |
|------------------------|-------|----------|----------|
| <i>GPR18</i>           | -1,26 | 1,49E-03 | 2,38E-02 |
| <i>DNAHL1</i>          | 1,18  | 1,49E-03 | 2,39E-02 |
| <i>ZNF503</i>          | -1,36 | 1,49E-03 | 2,39E-02 |
| <i>BE181768</i>        | 1,14  | 1,49E-03 | 2,39E-02 |
| <i>ASB14</i>           | -1,13 | 1,50E-03 | 2,39E-02 |
| <i>MGC13034</i>        | 1,12  | 1,50E-03 | 2,39E-02 |
| <i>GABRB2</i>          | 1,14  | 1,50E-03 | 2,39E-02 |
| <i>AF116642</i>        | 1,24  | 1,50E-03 | 2,40E-02 |
| <i>S100A5</i>          | 1,32  | 1,50E-03 | 2,40E-02 |
| <i>THC2373308</i>      | -1,15 | 1,51E-03 | 2,40E-02 |
| <i>ATP9B</i>           | -1,13 | 1,51E-03 | 2,40E-02 |
| <i>A_32_P97373</i>     | -1,58 | 1,51E-03 | 2,41E-02 |
| <i>FAM62B</i>          | 1,21  | 1,51E-03 | 2,41E-02 |
| <i>COL11A1</i>         | -1,26 | 1,51E-03 | 2,41E-02 |
| <i>CA432213</i>        | 1,18  | 1,51E-03 | 2,41E-02 |
| <i>A_23_P142197</i>    | 1,26  | 1,51E-03 | 2,41E-02 |
| <i>AK023328</i>        | -1,34 | 1,51E-03 | 2,41E-02 |
| <i>PEX11A</i>          | -1,13 | 1,52E-03 | 2,41E-02 |
| <i>ENST00000367169</i> | 1,40  | 1,52E-03 | 2,41E-02 |
| <i>MAP1LC3B</i>        | 1,18  | 1,52E-03 | 2,41E-02 |
| <i>PCTK2</i>           | 1,21  | 1,52E-03 | 2,41E-02 |
| <i>ZNF239</i>          | -1,40 | 1,53E-03 | 2,42E-02 |
| <i>HNMT</i>            | -1,20 | 1,53E-03 | 2,42E-02 |
| <i>C17orf71</i>        | -1,14 | 1,52E-03 | 2,42E-02 |
| <i>MTRF1L</i>          | 1,19  | 1,52E-03 | 2,42E-02 |
| <i>PGM2L1</i>          | 1,40  | 1,52E-03 | 2,42E-02 |
| <i>EOMES</i>           | -1,37 | 1,53E-03 | 2,42E-02 |
| <i>ENST00000377131</i> | -1,24 | 1,53E-03 | 2,43E-02 |
| <i>TMEM69</i>          | -1,15 | 1,53E-03 | 2,43E-02 |
| <i>THC2287647</i>      | -1,21 | 1,54E-03 | 2,43E-02 |
| <i>RGS3</i>            | 1,21  | 1,54E-03 | 2,43E-02 |
| <i>LOC644891</i>       | -1,30 | 1,54E-03 | 2,44E-02 |
| <i>CYLD</i>            | 1,08  | 1,54E-03 | 2,44E-02 |
| <i>IGHG1</i>           | -2,93 | 1,54E-03 | 2,44E-02 |
| <i>GORASP1</i>         | 1,13  | 1,55E-03 | 2,44E-02 |
| <i>FLJ45248</i>        | 1,40  | 1,55E-03 | 2,44E-02 |
| <i>ENST00000371327</i> | -1,18 | 1,55E-03 | 2,45E-02 |
| <i>ANGPT4</i>          | 1,19  | 1,55E-03 | 2,45E-02 |
| <i>A_23_P435390</i>    | -3,17 | 1,55E-03 | 2,45E-02 |
| <i>ENST00000256031</i> | 1,27  | 1,56E-03 | 2,45E-02 |
| <i>KIAA0754</i>        | -1,34 | 1,56E-03 | 2,46E-02 |
| <i>LR8</i>             | 1,37  | 1,57E-03 | 2,46E-02 |
| <i>CAMK1D</i>          | 1,24  | 1,57E-03 | 2,46E-02 |
| <i>C6orf204</i>        | 1,19  | 1,57E-03 | 2,46E-02 |

|                        |       |          |          |
|------------------------|-------|----------|----------|
| <i>TTR</i>             | 1,69  | 1,57E-03 | 2,47E-02 |
| <i>AW579481</i>        | -1,26 | 1,58E-03 | 2,47E-02 |
| <i>BC037882</i>        | -1,17 | 1,58E-03 | 2,47E-02 |
| <i>TMEM2</i>           | 1,42  | 1,58E-03 | 2,47E-02 |
| <i>AK023412</i>        | -1,39 | 1,58E-03 | 2,48E-02 |
| <i>DDEF2</i>           | 1,16  | 1,58E-03 | 2,48E-02 |
| <i>TRIM68</i>          | -1,18 | 1,59E-03 | 2,48E-02 |
| <i>ADAMTS16</i>        | -1,77 | 1,59E-03 | 2,48E-02 |
| <i>CCR5</i>            | -1,42 | 1,59E-03 | 2,49E-02 |
| <i>AI090268</i>        | 1,22  | 1,59E-03 | 2,49E-02 |
| <i>ZNRF1</i>           | -1,12 | 1,59E-03 | 2,49E-02 |
| <i>SORBS2</i>          | 1,38  | 1,60E-03 | 2,49E-02 |
| <i>MIER2</i>           | -1,12 | 1,60E-03 | 2,50E-02 |
| <i>A_24_P230100</i>    | 1,20  | 1,60E-03 | 2,50E-02 |
| <i>AK095564</i>        | -1,22 | 1,60E-03 | 2,50E-02 |
| <i>ZNF83</i>           | -1,19 | 1,61E-03 | 2,50E-02 |
| <i>ACAA1</i>           | -1,09 | 1,61E-03 | 2,50E-02 |
| <i>LOC644433</i>       | -1,30 | 1,61E-03 | 2,50E-02 |
| <i>HCN3</i>            | -1,16 | 1,61E-03 | 2,50E-02 |
| <i>AK027158</i>        | -1,14 | 1,61E-03 | 2,50E-02 |
| <i>L17326</i>          | 1,19  | 1,61E-03 | 2,50E-02 |
| <i>MCOLN3</i>          | 1,52  | 1,61E-03 | 2,50E-02 |
| <i>ENST00000374865</i> | -1,21 | 1,61E-03 | 2,51E-02 |
| <i>TBC1D10C</i>        | -1,38 | 1,62E-03 | 2,51E-02 |
| <i>LPAAT-THETA</i>     | -1,30 | 1,62E-03 | 2,51E-02 |
| <i>ZNF69</i>           | -1,17 | 1,62E-03 | 2,51E-02 |
| <i>NP500659</i>        | -1,13 | 1,62E-03 | 2,51E-02 |
| <i>THC2309258</i>      | -1,22 | 1,62E-03 | 2,51E-02 |
| <i>THC2283468</i>      | 1,26  | 1,62E-03 | 2,51E-02 |
| <i>GZMB</i>            | -1,33 | 1,62E-03 | 2,51E-02 |
| <i>SAMD8</i>           | 1,13  | 1,62E-03 | 2,51E-02 |
| <i>A_32_P62480</i>     | -1,20 | 1,63E-03 | 2,51E-02 |
| <i>THC2440737</i>      | -1,19 | 1,63E-03 | 2,51E-02 |
| <i>ADNP</i>            | -1,21 | 1,63E-03 | 2,51E-02 |
| <i>THC2437906</i>      | -1,24 | 1,63E-03 | 2,51E-02 |
| <i>AK057830</i>        | -1,27 | 1,63E-03 | 2,51E-02 |
| <i>WDR27</i>           | -1,16 | 1,63E-03 | 2,51E-02 |
| <i>MAGI3</i>           | 1,22  | 1,63E-03 | 2,51E-02 |
| <i>AV702101</i>        | -1,21 | 1,63E-03 | 2,51E-02 |
| <i>AKAP8</i>           | 1,12  | 1,64E-03 | 2,52E-02 |
| <i>MAP3K8</i>          | 1,52  | 1,64E-03 | 2,52E-02 |
| <i>NCR3</i>            | -1,22 | 1,65E-03 | 2,53E-02 |
| <i>RABL2A</i>          | -1,15 | 1,65E-03 | 2,53E-02 |
| <i>U39099</i>          | -1,13 | 1,65E-03 | 2,53E-02 |

|                        |       |          |          |
|------------------------|-------|----------|----------|
| <i>KLF3</i>            | 1,10  | 1,65E-03 | 2,53E-02 |
| <i>A_23_P21862</i>     | 1,15  | 1,64E-03 | 2,53E-02 |
| <i>THC2349894</i>      | 1,29  | 1,65E-03 | 2,53E-02 |
| <i>NTF3</i>            | 1,46  | 1,65E-03 | 2,53E-02 |
| <i>THC2271582</i>      | 2,25  | 1,65E-03 | 2,53E-02 |
| <i>HMG20A</i>          | -1,12 | 1,65E-03 | 2,53E-02 |
| <i>SLC25A29</i>        | -1,14 | 1,65E-03 | 2,53E-02 |
| <i>GRASP</i>           | 1,40  | 1,65E-03 | 2,53E-02 |
| <i>ZNF610</i>          | -1,26 | 1,66E-03 | 2,53E-02 |
| <i>ZNF227</i>          | -1,13 | 1,66E-03 | 2,53E-02 |
| <i>A_24_P144543</i>    | -1,13 | 1,66E-03 | 2,53E-02 |
| <i>VLDLR</i>           | -1,46 | 1,66E-03 | 2,53E-02 |
| <i>OMD</i>             | -1,41 | 1,66E-03 | 2,53E-02 |
| <i>C1orf142</i>        | -1,14 | 1,66E-03 | 2,53E-02 |
| <i>LOC116143</i>       | -1,15 | 1,67E-03 | 2,54E-02 |
| <i>NOC3L</i>           | -1,13 | 1,67E-03 | 2,54E-02 |
| <i>CR590530</i>        | -1,12 | 1,67E-03 | 2,54E-02 |
| <i>BC042589</i>        | -1,11 | 1,67E-03 | 2,54E-02 |
| <i>RASGEF1C</i>        | 1,13  | 1,67E-03 | 2,54E-02 |
| <i>KBTBD2</i>          | 1,30  | 1,67E-03 | 2,54E-02 |
| <i>LHX4</i>            | -1,18 | 1,67E-03 | 2,54E-02 |
| <i>SCAP1</i>           | -1,27 | 1,67E-03 | 2,54E-02 |
| <i>CR597846</i>        | -1,20 | 1,67E-03 | 2,54E-02 |
| <i>LOC166994</i>       | -1,19 | 1,68E-03 | 2,54E-02 |
| <i>BHLHB9</i>          | -1,16 | 1,67E-03 | 2,54E-02 |
| <i>RP4-747L4.3</i>     | -1,14 | 1,68E-03 | 2,54E-02 |
| <i>ARMCX6</i>          | -1,14 | 1,68E-03 | 2,54E-02 |
| <i>NVL</i>             | -1,11 | 1,68E-03 | 2,54E-02 |
| <i>TMEM16B</i>         | 1,42  | 1,67E-03 | 2,54E-02 |
| <i>BCL10</i>           | 1,28  | 1,68E-03 | 2,54E-02 |
| <i>CACNA1G</i>         | -1,61 | 1,68E-03 | 2,54E-02 |
| <i>THC2321585</i>      | -1,23 | 1,68E-03 | 2,54E-02 |
| <i>ENST00000367001</i> | -1,22 | 1,68E-03 | 2,54E-02 |
| <i>THC2278676</i>      | -1,16 | 1,68E-03 | 2,54E-02 |
| <i>IDS</i>             | 1,15  | 1,68E-03 | 2,54E-02 |
| <i>PADI4</i>           | 1,09  | 1,69E-03 | 2,54E-02 |
| <i>UBE2H</i>           | 1,16  | 1,69E-03 | 2,55E-02 |
| <i>DEFB104A</i>        | 1,11  | 1,69E-03 | 2,55E-02 |
| <i>TIGD1</i>           | -1,13 | 1,69E-03 | 2,55E-02 |
| <i>CDKN1B</i>          | -1,25 | 1,70E-03 | 2,55E-02 |
| <i>ETS1</i>            | 1,23  | 1,70E-03 | 2,55E-02 |
| <i>SORCS1</i>          | 1,40  | 1,70E-03 | 2,55E-02 |
| <i>A_24_P118336</i>    | 1,21  | 1,70E-03 | 2,55E-02 |
| <i>SLITRK3</i>         | -2,60 | 1,70E-03 | 2,56E-02 |



|                        |       |          |          |
|------------------------|-------|----------|----------|
| <i>IFNAR1</i>          | 1,16  | 1,70E-03 | 2,56E-02 |
| <i>THC2279919</i>      | -1,32 | 1,71E-03 | 2,56E-02 |
| <i>CR619772</i>        | -1,15 | 1,71E-03 | 2,56E-02 |
| <i>UAP1</i>            | 1,28  | 1,71E-03 | 2,56E-02 |
| <i>ENST00000380643</i> | -1,12 | 1,71E-03 | 2,57E-02 |
| <i>AU121805</i>        | -1,21 | 1,72E-03 | 2,57E-02 |
| <i>FLJ25715</i>        | -1,19 | 1,72E-03 | 2,57E-02 |
| <i>LGI4</i>            | 1,25  | 1,72E-03 | 2,57E-02 |
| <i>ZNF540</i>          | -1,43 | 1,72E-03 | 2,57E-02 |
| <i>C6orf211</i>        | -1,21 | 1,72E-03 | 2,57E-02 |
| <i>ANKRD29</i>         | 1,15  | 1,72E-03 | 2,57E-02 |
| <i>MGC4093</i>         | 1,18  | 1,72E-03 | 2,57E-02 |
| <i>TREM1</i>           | 1,59  | 1,72E-03 | 2,57E-02 |
| <i>DNER</i>            | -1,30 | 1,73E-03 | 2,58E-02 |
| <i>CR749547</i>        | 1,60  | 1,73E-03 | 2,58E-02 |
| <i>ENST00000342584</i> | -1,18 | 1,73E-03 | 2,59E-02 |
| <i>AK091836</i>        | -1,15 | 1,74E-03 | 2,59E-02 |
| <i>A_23_P33773</i>     | 1,32  | 1,74E-03 | 2,59E-02 |
| <i>DPY19L3</i>         | -1,23 | 1,74E-03 | 2,59E-02 |
| <i>THC2251776</i>      | -1,19 | 1,74E-03 | 2,59E-02 |
| <i>A_24_P575267</i>    | 1,18  | 1,74E-03 | 2,59E-02 |
| <i>SLC35F3</i>         | 1,80  | 1,74E-03 | 2,60E-02 |
| <i>ENST00000382957</i> | -1,45 | 1,75E-03 | 2,60E-02 |
| <i>MRPL54</i>          | 1,10  | 1,75E-03 | 2,60E-02 |
| <i>THC2449838</i>      | -1,17 | 1,75E-03 | 2,60E-02 |
| <i>A_32_P325710</i>    | 1,20  | 1,75E-03 | 2,60E-02 |
| <i>ATP2B1</i>          | 1,21  | 1,75E-03 | 2,60E-02 |
| <i>KIAA1005</i>        | -1,25 | 1,76E-03 | 2,60E-02 |
| <i>AK093006</i>        | -1,26 | 1,76E-03 | 2,61E-02 |
| <i>FLJ14167</i>        | -1,32 | 1,76E-03 | 2,61E-02 |
| <i>SERTAD3</i>         | 1,29  | 1,77E-03 | 2,62E-02 |
| <i>C7orf27</i>         | -1,11 | 1,77E-03 | 2,62E-02 |
| <i>C14orf111</i>       | -1,12 | 1,77E-03 | 2,62E-02 |
| <i>AF289611</i>        | -1,15 | 1,78E-03 | 2,63E-02 |
| <i>PRDM8</i>           | -1,56 | 1,78E-03 | 2,63E-02 |
| <i>C8orf46</i>         | -1,33 | 1,78E-03 | 2,63E-02 |
| <i>BOLA1</i>           | -1,18 | 1,78E-03 | 2,63E-02 |
| <i>EPC1</i>            | -1,11 | 1,78E-03 | 2,63E-02 |
| <i>ENST00000378953</i> | -1,20 | 1,79E-03 | 2,64E-02 |
| <i>DYNC2H1</i>         | -1,17 | 1,79E-03 | 2,64E-02 |
| <i>AK022109</i>        | -1,14 | 1,79E-03 | 2,64E-02 |
| <i>A_24_P603890</i>    | 1,15  | 1,79E-03 | 2,64E-02 |
| <i>INHBA</i>           | 1,80  | 1,79E-03 | 2,64E-02 |
| <i>NR2F2</i>           | -1,21 | 1,79E-03 | 2,64E-02 |

|                        |       |          |          |
|------------------------|-------|----------|----------|
| <i>FLJ21816</i>        | -1,15 | 1,79E-03 | 2,64E-02 |
| <i>A_24_P409115</i>    | -1,12 | 1,79E-03 | 2,64E-02 |
| <i>RETNLB</i>          | 1,12  | 1,80E-03 | 2,65E-02 |
| <i>THC2267456</i>      | -1,16 | 1,80E-03 | 2,65E-02 |
| <i>LOC153364</i>       | -1,23 | 1,81E-03 | 2,65E-02 |
| <i>FAM55C</i>          | 1,13  | 1,81E-03 | 2,66E-02 |
| <i>C21orf63</i>        | 1,32  | 1,81E-03 | 2,66E-02 |
| <i>AL117454</i>        | -1,29 | 1,81E-03 | 2,66E-02 |
| <i>OR7E104P</i>        | 1,31  | 1,82E-03 | 2,66E-02 |
| <i>CR624679</i>        | -1,16 | 1,82E-03 | 2,67E-02 |
| <i>CCNH</i>            | 1,21  | 1,82E-03 | 2,67E-02 |
| <i>GRM7</i>            | -1,17 | 1,82E-03 | 2,67E-02 |
| <i>TMEM106A</i>        | -1,16 | 1,83E-03 | 2,67E-02 |
| <i>A_23_P75129</i>     | 1,21  | 1,83E-03 | 2,68E-02 |
| <i>SCML4</i>           | -1,12 | 1,83E-03 | 2,68E-02 |
| <i>ZNF93</i>           | -1,22 | 1,84E-03 | 2,68E-02 |
| <i>THC2308675</i>      | -1,18 | 1,84E-03 | 2,68E-02 |
| <i>PRRG1</i>           | 1,12  | 1,84E-03 | 2,68E-02 |
| <i>RGS11</i>           | 1,21  | 1,84E-03 | 2,68E-02 |
| <i>BC073976</i>        | 1,23  | 1,84E-03 | 2,68E-02 |
| <i>KIAA1754</i>        | 1,29  | 1,84E-03 | 2,68E-02 |
| <i>THC2442442</i>      | -1,17 | 1,84E-03 | 2,68E-02 |
| <i>SMOC2</i>           | -1,60 | 1,84E-03 | 2,69E-02 |
| <i>A_24_P67494</i>     | 1,14  | 1,85E-03 | 2,69E-02 |
| <i>GPC2</i>            | -1,12 | 1,86E-03 | 2,70E-02 |
| <i>ARPC5L</i>          | 1,21  | 1,86E-03 | 2,70E-02 |
| <i>AK124515</i>        | -1,15 | 1,86E-03 | 2,70E-02 |
| <i>YTHDF3</i>          | 1,24  | 1,86E-03 | 2,70E-02 |
| <i>B3GNT5</i>          | 1,35  | 1,86E-03 | 2,70E-02 |
| <i>BE161325</i>        | 1,35  | 1,86E-03 | 2,70E-02 |
| <i>THC2296299</i>      | -1,13 | 1,86E-03 | 2,71E-02 |
| <i>CPEB4</i>           | 1,16  | 1,87E-03 | 2,71E-02 |
| <i>PEX13</i>           | 1,16  | 1,87E-03 | 2,71E-02 |
| <i>CPA3</i>            | -1,52 | 1,87E-03 | 2,72E-02 |
| <i>PDZD8</i>           | 1,20  | 1,88E-03 | 2,72E-02 |
| <i>A_24_P521544</i>    | 1,21  | 1,89E-03 | 2,74E-02 |
| <i>NR4A1</i>           | 2,74  | 1,89E-03 | 2,74E-02 |
| <i>SPINT2</i>          | -1,37 | 1,89E-03 | 2,74E-02 |
| <i>UACA</i>            | 1,23  | 1,90E-03 | 2,74E-02 |
| <i>TRIM11</i>          | -1,13 | 1,90E-03 | 2,74E-02 |
| <i>LOC283874</i>       | -1,16 | 1,90E-03 | 2,75E-02 |
| <i>OGN</i>             | -1,47 | 1,90E-03 | 2,75E-02 |
| <i>ENST00000254846</i> | 1,29  | 1,90E-03 | 2,75E-02 |
| <i>THC2280062</i>      | -1,17 | 1,91E-03 | 2,75E-02 |

|                        |       |          |          |
|------------------------|-------|----------|----------|
| <i>A_24_P110201</i>    | 1,14  | 1,91E-03 | 2,75E-02 |
| <i>SETDB1</i>          | -1,15 | 1,91E-03 | 2,75E-02 |
| <i>FLJ23577</i>        | -1,15 | 1,91E-03 | 2,76E-02 |
| <i>SAP30</i>           | 1,17  | 1,91E-03 | 2,76E-02 |
| <i>THC2441367</i>      | -1,38 | 1,92E-03 | 2,76E-02 |
| <i>NRAS</i>            | 1,17  | 1,92E-03 | 2,76E-02 |
| <i>C12orf25</i>        | 1,09  | 1,93E-03 | 2,77E-02 |
| <i>C21orf93</i>        | 1,14  | 1,93E-03 | 2,78E-02 |
| <i>A_32_P71016</i>     | 1,30  | 1,93E-03 | 2,78E-02 |
| <i>THC2339455</i>      | -1,20 | 1,94E-03 | 2,78E-02 |
| <i>PDIA2</i>           | 1,17  | 1,94E-03 | 2,78E-02 |
| <i>C3</i>              | -2,56 | 1,94E-03 | 2,79E-02 |
| <i>SACS</i>            | 1,27  | 1,94E-03 | 2,79E-02 |
| <i>LOC653857</i>       | -1,16 | 1,95E-03 | 2,79E-02 |
| <i>BAG1</i>            | 1,14  | 1,95E-03 | 2,80E-02 |
| <i>FZD6</i>            | 1,27  | 1,95E-03 | 2,80E-02 |
| <i>SLC25A5</i>         | 1,14  | 1,96E-03 | 2,80E-02 |
| <i>ENST00000327386</i> | 1,13  | 1,96E-03 | 2,81E-02 |
| <i>PEG10</i>           | -1,25 | 1,97E-03 | 2,81E-02 |
| <i>SCARA3</i>          | -1,30 | 1,97E-03 | 2,81E-02 |
| <i>C20orf77</i>        | -1,14 | 1,97E-03 | 2,81E-02 |
| <i>RHOC</i>            | 1,12  | 1,97E-03 | 2,81E-02 |
| <i>BI910665</i>        | -1,19 | 1,97E-03 | 2,82E-02 |
| <i>THC2375021</i>      | -1,21 | 1,98E-03 | 2,82E-02 |
| <i>AK093640</i>        | -1,22 | 1,98E-03 | 2,82E-02 |
| <i>UNQ6975</i>         | 1,31  | 1,98E-03 | 2,82E-02 |
| <i>MYC</i>             | 2,13  | 1,98E-03 | 2,82E-02 |
| <i>CRYAB</i>           | 1,20  | 1,98E-03 | 2,82E-02 |
| <i>ZNF536</i>          | 1,26  | 1,98E-03 | 2,82E-02 |
| <i>LIG1</i>            | -1,17 | 1,99E-03 | 2,82E-02 |
| <i>ENST00000330598</i> | 1,17  | 1,99E-03 | 2,83E-02 |
| <i>GPSM2</i>           | 1,41  | 1,99E-03 | 2,83E-02 |
| <i>THC2409987</i>      | -1,16 | 1,99E-03 | 2,83E-02 |
| <i>A_24_P534133</i>    | 1,12  | 2,00E-03 | 2,83E-02 |
| <i>DPYSL2</i>          | 1,19  | 2,00E-03 | 2,83E-02 |
| <i>LATS2</i>           | 1,25  | 2,00E-03 | 2,83E-02 |
| <i>RAMP1</i>           | -1,53 | 2,00E-03 | 2,84E-02 |
| <i>MGC4562</i>         | -1,11 | 2,01E-03 | 2,84E-02 |
| <i>AK001903</i>        | 1,62  | 2,01E-03 | 2,84E-02 |
| <i>FBXO24</i>          | -1,22 | 2,01E-03 | 2,84E-02 |
| <i>RNF170</i>          | -1,12 | 2,01E-03 | 2,85E-02 |
| <i>X77690</i>          | 1,15  | 2,01E-03 | 2,85E-02 |
| <i>THC2314058</i>      | -1,19 | 2,02E-03 | 2,85E-02 |
| <i>DQX1</i>            | 1,11  | 2,02E-03 | 2,85E-02 |

|                        |       |          |          |
|------------------------|-------|----------|----------|
| <i>C7orf29</i>         | -1,42 | 2,02E-03 | 2,85E-02 |
| <i>MMS19L</i>          | -1,13 | 2,02E-03 | 2,85E-02 |
| <i>SLPI</i>            | -1,86 | 2,03E-03 | 2,86E-02 |
| <i>CR591776</i>        | -1,12 | 2,03E-03 | 2,86E-02 |
| <i>VCPIP1</i>          | 1,15  | 2,03E-03 | 2,86E-02 |
| <i>THC2407737</i>      | -1,21 | 2,03E-03 | 2,86E-02 |
| <i>TNFAIP8</i>         | -1,21 | 2,04E-03 | 2,86E-02 |
| <i>PLAA</i>            | 1,12  | 2,03E-03 | 2,86E-02 |
| <i>KCNE4</i>           | 1,52  | 2,03E-03 | 2,86E-02 |
| <i>AK023947</i>        | -1,20 | 2,04E-03 | 2,87E-02 |
| <i>A_24_P255836</i>    | 1,14  | 2,04E-03 | 2,87E-02 |
| <i>RHPN1</i>           | 1,16  | 2,04E-03 | 2,87E-02 |
| <i>BG201859</i>        | -1,20 | 2,05E-03 | 2,88E-02 |
| <i>DAPK3</i>           | 1,23  | 2,06E-03 | 2,88E-02 |
| <i>TIPARP</i>          | 1,72  | 2,05E-03 | 2,88E-02 |
| <i>FANCG</i>           | -1,14 | 2,06E-03 | 2,89E-02 |
| <i>OR10A5</i>          | 1,14  | 2,06E-03 | 2,89E-02 |
| <i>ZNF285</i>          | -1,26 | 2,06E-03 | 2,89E-02 |
| <i>BC045716</i>        | 1,16  | 2,06E-03 | 2,89E-02 |
| <i>AK074635</i>        | 1,26  | 2,06E-03 | 2,89E-02 |
| <i>SMC4</i>            | 1,12  | 2,07E-03 | 2,89E-02 |
| <i>TTC14</i>           | -1,16 | 2,07E-03 | 2,90E-02 |
| <i>GOSR1</i>           | 1,08  | 2,07E-03 | 2,90E-02 |
| <i>YARS2</i>           | -1,11 | 2,08E-03 | 2,91E-02 |
| <i>LAMA5</i>           | 1,16  | 2,08E-03 | 2,91E-02 |
| <i>PIGG</i>            | -1,11 | 2,08E-03 | 2,91E-02 |
| <i>BNC2</i>            | -1,19 | 2,09E-03 | 2,91E-02 |
| <i>C11orf61</i>        | -1,18 | 2,09E-03 | 2,91E-02 |
| <i>ADAM17</i>          | 1,13  | 2,09E-03 | 2,91E-02 |
| <i>THC2440609</i>      | 1,27  | 2,09E-03 | 2,92E-02 |
| <i>A_23_P113453</i>    | 1,37  | 2,09E-03 | 2,92E-02 |
| <i>ENST00000295339</i> | -2,46 | 2,10E-03 | 2,92E-02 |
| <i>WT1</i>             | -1,57 | 2,10E-03 | 2,92E-02 |
| <i>RGS9</i>            | 1,40  | 2,10E-03 | 2,92E-02 |
| <i>CTR9</i>            | -1,13 | 2,11E-03 | 2,93E-02 |
| <i>RGC32</i>           | 1,45  | 2,11E-03 | 2,94E-02 |
| <i>ENST00000329367</i> | 1,15  | 2,12E-03 | 2,94E-02 |
| <i>RCBTB1</i>          | -1,15 | 2,12E-03 | 2,95E-02 |
| <i>STX16</i>           | -1,14 | 2,13E-03 | 2,95E-02 |
| <i>CXorf24</i>         | -1,12 | 2,13E-03 | 2,95E-02 |
| <i>ATP6V1D</i>         | 1,17  | 2,13E-03 | 2,95E-02 |
| <i>EGR4</i>            | 1,19  | 2,13E-03 | 2,95E-02 |
| <i>NTN1</i>            | 1,56  | 2,13E-03 | 2,95E-02 |
| <i>RBM8A</i>           | 1,13  | 2,13E-03 | 2,95E-02 |

|                      |       |          |          |
|----------------------|-------|----------|----------|
| <i>IBRDC1</i>        | 1,16  | 2,13E-03 | 2,95E-02 |
| <i>IGSF11</i>        | 1,14  | 2,14E-03 | 2,96E-02 |
| <i>THC2373771</i>    | -1,12 | 2,14E-03 | 2,96E-02 |
| <i>BM975332</i>      | -1,14 | 2,14E-03 | 2,96E-02 |
| <i>MMP28</i>         | 1,21  | 2,15E-03 | 2,96E-02 |
| <i>SLC29A4</i>       | -1,22 | 2,16E-03 | 2,98E-02 |
| <i>THC2459187</i>    | -1,14 | 2,16E-03 | 2,98E-02 |
| <i>BU567832</i>      | -1,24 | 2,17E-03 | 2,99E-02 |
| <i>AK130456</i>      | -1,22 | 2,17E-03 | 2,99E-02 |
| <i>THC2432515</i>    | 1,24  | 2,17E-03 | 2,99E-02 |
| <i>ITGA3</i>         | 1,27  | 2,17E-03 | 2,99E-02 |
| <i>MAK</i>           | 1,35  | 2,18E-03 | 3,00E-02 |
| <i>SYNGR2</i>        | 1,18  | 2,18E-03 | 3,00E-02 |
| <i>ATP1A1</i>        | 1,21  | 2,18E-03 | 3,00E-02 |
| <i>XPO5</i>          | -1,12 | 2,18E-03 | 3,00E-02 |
| <i>IKBKAP</i>        | -1,10 | 2,19E-03 | 3,01E-02 |
| <i>BE184906</i>      | -1,31 | 2,19E-03 | 3,01E-02 |
| <i>THC2347909</i>    | -1,33 | 2,19E-03 | 3,01E-02 |
| <i>EPM2AIP1</i>      | -1,15 | 2,19E-03 | 3,01E-02 |
| <i>MGC14425</i>      | 1,10  | 2,20E-03 | 3,02E-02 |
| <i>PPP2R5B</i>       | 1,17  | 2,20E-03 | 3,02E-02 |
| <i>KIAA1305</i>      | -1,15 | 2,20E-03 | 3,02E-02 |
| <i>DB376160</i>      | 1,11  | 2,20E-03 | 3,02E-02 |
| <i>NHS</i>           | -1,28 | 2,20E-03 | 3,02E-02 |
| <i>HSD17B13</i>      | 1,16  | 2,21E-03 | 3,02E-02 |
| <i>OSBPL6</i>        | 1,23  | 2,21E-03 | 3,02E-02 |
| <i>PTPRE</i>         | 1,40  | 2,21E-03 | 3,02E-02 |
| <i>LOC340508</i>     | 1,17  | 2,21E-03 | 3,02E-02 |
| <i>METRN</i>         | 1,16  | 2,22E-03 | 3,03E-02 |
| <i>TMEM108</i>       | 1,29  | 2,22E-03 | 3,03E-02 |
| <i>CNIH3</i>         | -1,18 | 2,22E-03 | 3,04E-02 |
| <i>TCP11L1</i>       | 1,17  | 2,23E-03 | 3,04E-02 |
| <i>CDC37L1</i>       | 1,18  | 2,23E-03 | 3,04E-02 |
| <i>A_24_P541483</i>  | 1,31  | 2,23E-03 | 3,04E-02 |
| <i>BM929882</i>      | 1,45  | 2,23E-03 | 3,04E-02 |
| <i>RAB3IP</i>        | 1,17  | 2,23E-03 | 3,04E-02 |
| <i>TNFRSF7</i>       | -1,24 | 2,23E-03 | 3,04E-02 |
| <i>DKFZp762P2111</i> | -1,10 | 2,24E-03 | 3,05E-02 |
| <i>W45382</i>        | 1,15  | 2,24E-03 | 3,05E-02 |
| <i>CAV2</i>          | 1,23  | 2,24E-03 | 3,05E-02 |
| <i>C22orf29</i>      | -1,18 | 2,25E-03 | 3,05E-02 |
| <i>SNRP70</i>        | -1,12 | 2,25E-03 | 3,05E-02 |
| <i>SEPHS2</i>        | 1,13  | 2,25E-03 | 3,05E-02 |
| <i>EPHA4</i>         | 1,16  | 2,25E-03 | 3,05E-02 |

|                        |       |          |          |
|------------------------|-------|----------|----------|
| <i>C9orf122</i>        | 1,17  | 2,25E-03 | 3,05E-02 |
| <i>USP30</i>           | -1,18 | 2,25E-03 | 3,06E-02 |
| <i>A_24_P67632</i>     | 1,14  | 2,25E-03 | 3,06E-02 |
| <i>CSMD3</i>           | 1,47  | 2,26E-03 | 3,06E-02 |
| <i>LYL1</i>            | -1,17 | 2,26E-03 | 3,06E-02 |
| <i>MAX</i>             | -1,12 | 2,26E-03 | 3,06E-02 |
| <i>SCARB2</i>          | 1,19  | 2,26E-03 | 3,06E-02 |
| <i>GPR116</i>          | 1,31  | 2,26E-03 | 3,06E-02 |
| <i>CAB39L</i>          | 1,38  | 2,26E-03 | 3,06E-02 |
| <i>EPC2</i>            | -1,16 | 2,28E-03 | 3,08E-02 |
| <i>BC044628</i>        | 1,15  | 2,28E-03 | 3,08E-02 |
| <i>ZNF287</i>          | -1,21 | 2,29E-03 | 3,09E-02 |
| <i>BC001335</i>        | -1,17 | 2,29E-03 | 3,09E-02 |
| <i>MED9</i>            | -1,15 | 2,29E-03 | 3,09E-02 |
| <i>LOC145694</i>       | 1,25  | 2,29E-03 | 3,09E-02 |
| <i>MTERFD2</i>         | -1,13 | 2,30E-03 | 3,10E-02 |
| <i>MED8</i>            | -1,12 | 2,30E-03 | 3,10E-02 |
| <i>FLJ16734</i>        | -1,35 | 2,30E-03 | 3,10E-02 |
| <i>AK123302</i>        | -1,19 | 2,30E-03 | 3,10E-02 |
| <i>CDK2</i>            | 1,16  | 2,30E-03 | 3,10E-02 |
| <i>AK096778</i>        | -1,20 | 2,31E-03 | 3,10E-02 |
| <i>NROB2</i>           | 1,10  | 2,32E-03 | 3,12E-02 |
| <i>HIAT1</i>           | 1,13  | 2,32E-03 | 3,12E-02 |
| <i>THC2404004</i>      | 1,52  | 2,32E-03 | 3,12E-02 |
| <i>LRRN5</i>           | -1,47 | 2,33E-03 | 3,13E-02 |
| <i>TTC23</i>           | -1,14 | 2,33E-03 | 3,13E-02 |
| <i>CX164944</i>        | -1,13 | 2,34E-03 | 3,13E-02 |
| <i>AK027173</i>        | 1,11  | 2,33E-03 | 3,13E-02 |
| <i>THC2314371</i>      | 1,22  | 2,34E-03 | 3,13E-02 |
| <i>AKT3</i>            | 1,25  | 2,34E-03 | 3,13E-02 |
| <i>X03757</i>          | 1,21  | 2,34E-03 | 3,14E-02 |
| <i>THC2427156</i>      | -1,17 | 2,34E-03 | 3,14E-02 |
| <i>ZNF221</i>          | -1,11 | 2,34E-03 | 3,14E-02 |
| <i>AK025234</i>        | -1,16 | 2,35E-03 | 3,14E-02 |
| <i>ENST00000369750</i> | -1,13 | 2,35E-03 | 3,14E-02 |
| <i>ID2</i>             | 1,21  | 2,35E-03 | 3,14E-02 |
| <i>A_24_P835943</i>    | 1,25  | 2,35E-03 | 3,14E-02 |
| <i>GSTA3</i>           | 1,29  | 2,35E-03 | 3,14E-02 |
| <i>TNFAIP8L2</i>       | -1,21 | 2,35E-03 | 3,14E-02 |
| <i>GRIK1</i>           | 1,28  | 2,36E-03 | 3,15E-02 |
| <i>ENST00000371276</i> | -1,76 | 2,36E-03 | 3,15E-02 |
| <i>LRP5L</i>           | -1,23 | 2,36E-03 | 3,15E-02 |
| <i>A_23_P91130</i>     | -1,14 | 2,37E-03 | 3,15E-02 |
| <i>ARHGAP24</i>        | 1,17  | 2,36E-03 | 3,15E-02 |

|                        |       |          |          |
|------------------------|-------|----------|----------|
| <i>A_24_P126851</i>    | 1,23  | 2,36E-03 | 3,15E-02 |
| <i>THC2314643</i>      | 1,44  | 2,36E-03 | 3,15E-02 |
| <i>LOC649259</i>       | 1,18  | 2,37E-03 | 3,15E-02 |
| <i>THC2315069</i>      | -1,24 | 2,37E-03 | 3,16E-02 |
| <i>SNF1LK2</i>         | 1,19  | 2,37E-03 | 3,16E-02 |
| <i>HOXA11</i>          | -1,19 | 2,38E-03 | 3,16E-02 |
| <i>ZNF174</i>          | -1,18 | 2,38E-03 | 3,16E-02 |
| <i>W81715</i>          | 1,09  | 2,38E-03 | 3,16E-02 |
| <i>AK097447</i>        | 1,44  | 2,38E-03 | 3,16E-02 |
| <i>BC020877</i>        | -1,23 | 2,38E-03 | 3,17E-02 |
| <i>A_24_P920070</i>    | 1,11  | 2,39E-03 | 3,17E-02 |
| <i>LOC650766</i>       | -1,16 | 2,39E-03 | 3,17E-02 |
| <i>GZMA</i>            | -1,59 | 2,39E-03 | 3,17E-02 |
| <i>AF087999</i>        | -1,17 | 2,39E-03 | 3,17E-02 |
| <i>NGFRAP1</i>         | -1,15 | 2,40E-03 | 3,17E-02 |
| <i>ENST00000342294</i> | 1,32  | 2,40E-03 | 3,18E-02 |
| <i>UBE2W</i>           | 1,09  | 2,40E-03 | 3,18E-02 |
| <i>FLJ36840</i>        | -1,39 | 2,41E-03 | 3,19E-02 |
| <i>A_32_P142664</i>    | -1,18 | 2,41E-03 | 3,19E-02 |
| <i>MIZF</i>            | -1,15 | 2,41E-03 | 3,19E-02 |
| <i>PLEKHM2</i>         | 1,16  | 2,41E-03 | 3,19E-02 |
| <i>THC2247947</i>      | 1,30  | 2,41E-03 | 3,19E-02 |
| <i>CEBPE</i>           | 1,52  | 2,41E-03 | 3,19E-02 |
| <i>CA4</i>             | 1,27  | 2,42E-03 | 3,19E-02 |
| <i>PIK3CG</i>          | -1,14 | 2,42E-03 | 3,19E-02 |
| <i>RPA2</i>            | -1,12 | 2,42E-03 | 3,19E-02 |
| <i>THC2411106</i>      | 1,32  | 2,42E-03 | 3,19E-02 |
| <i>AI676010</i>        | -1,17 | 2,42E-03 | 3,19E-02 |
| <i>A_24_P922430</i>    | -1,12 | 2,43E-03 | 3,20E-02 |
| <i>DB365607</i>        | -1,13 | 2,44E-03 | 3,21E-02 |
| <i>THC2381045</i>      | -1,19 | 2,44E-03 | 3,21E-02 |
| <i>A_24_P929413</i>    | 1,14  | 2,44E-03 | 3,21E-02 |
| <i>EIF2C2</i>          | 1,12  | 2,45E-03 | 3,22E-02 |
| <i>ZNF624</i>          | -1,21 | 2,46E-03 | 3,23E-02 |
| <i>LOC641467</i>       | -1,21 | 2,46E-03 | 3,23E-02 |
| <i>COX6C</i>           | 1,14  | 2,46E-03 | 3,23E-02 |
| <i>ZNF452</i>          | -1,25 | 2,48E-03 | 3,25E-02 |
| <i>AF269286</i>        | -1,14 | 2,48E-03 | 3,25E-02 |
| <i>S100A4</i>          | 1,26  | 2,48E-03 | 3,25E-02 |
| <i>C8orf15</i>         | -1,23 | 2,48E-03 | 3,26E-02 |
| <i>CR603845</i>        | -1,15 | 2,49E-03 | 3,26E-02 |
| <i>AF086221</i>        | -1,19 | 2,49E-03 | 3,26E-02 |
| <i>C19orf19</i>        | 1,27  | 2,49E-03 | 3,26E-02 |
| <i>SR140</i>           | -1,23 | 2,49E-03 | 3,26E-02 |

|                 |       |          |          |
|-----------------|-------|----------|----------|
| ZNF669          | 1,12  | 2,50E-03 | 3,26E-02 |
| ENST00000361859 | -1,14 | 2,50E-03 | 3,27E-02 |
| MT1M            | 1,66  | 2,50E-03 | 3,27E-02 |
| GUCA1B          | -1,12 | 2,52E-03 | 3,28E-02 |
| IQCD            | 1,18  | 2,52E-03 | 3,28E-02 |
| HIGD1A          | 1,21  | 2,52E-03 | 3,28E-02 |
| A_32_P127454    | 1,22  | 2,52E-03 | 3,28E-02 |
| LOC644613       | -1,15 | 2,52E-03 | 3,28E-02 |
| LOC221442       | -1,23 | 2,52E-03 | 3,28E-02 |
| AK127494        | -1,13 | 2,52E-03 | 3,29E-02 |
| THC2266257      | -1,13 | 2,52E-03 | 3,29E-02 |
| THC2317264      | -1,77 | 2,53E-03 | 3,29E-02 |
| HSPA4           | 1,12  | 2,53E-03 | 3,29E-02 |
| THC2280106      | -1,22 | 2,54E-03 | 3,30E-02 |
| ENST00000325900 | -1,17 | 2,54E-03 | 3,31E-02 |
| ANXA9           | -1,43 | 2,55E-03 | 3,31E-02 |
| CD247           | -1,32 | 2,55E-03 | 3,31E-02 |
| ANKRA2          | -1,24 | 2,55E-03 | 3,31E-02 |
| ABHD5           | 1,39  | 2,55E-03 | 3,31E-02 |
| C9orf86         | 1,09  | 2,55E-03 | 3,31E-02 |
| CCDC21          | 1,15  | 2,55E-03 | 3,31E-02 |
| THC2314970      | -1,14 | 2,56E-03 | 3,32E-02 |
| MGC24103        | -1,27 | 2,56E-03 | 3,32E-02 |
| THAP6           | -1,16 | 2,56E-03 | 3,32E-02 |
| LOC285958       | 1,24  | 2,57E-03 | 3,32E-02 |
| A_23_P151376    | 1,24  | 2,57E-03 | 3,32E-02 |
| A_32_P213948    | 2,12  | 2,57E-03 | 3,32E-02 |
| ESAM            | 1,22  | 2,57E-03 | 3,33E-02 |
| A_24_P627678    | -1,09 | 2,58E-03 | 3,34E-02 |
| ENST00000367588 | -1,19 | 2,59E-03 | 3,34E-02 |
| BC035091        | -1,43 | 2,59E-03 | 3,34E-02 |
| MGC12966        | -1,18 | 2,59E-03 | 3,34E-02 |
| LOC643932       | -1,12 | 2,60E-03 | 3,35E-02 |
| FLJ39198        | 1,28  | 2,60E-03 | 3,35E-02 |
| KLF4            | 1,73  | 2,60E-03 | 3,35E-02 |
| ZNF565          | -1,12 | 2,60E-03 | 3,35E-02 |
| ITGA5           | 1,42  | 2,60E-03 | 3,35E-02 |
| CSTF2T          | -1,16 | 2,61E-03 | 3,35E-02 |
| DYNLL2          | 1,14  | 2,61E-03 | 3,36E-02 |
| THC2379232      | -1,15 | 2,62E-03 | 3,36E-02 |
| THC2438118      | -1,56 | 2,62E-03 | 3,37E-02 |
| X57802          | -2,44 | 2,62E-03 | 3,37E-02 |
| SLC35D2         | 1,11  | 2,63E-03 | 3,37E-02 |
| RP9             | -1,13 | 2,63E-03 | 3,38E-02 |



|                        |       |          |          |
|------------------------|-------|----------|----------|
| <i>THC2338310</i>      | -1,17 | 2,64E-03 | 3,38E-02 |
| <i>THC2335352</i>      | 1,14  | 2,64E-03 | 3,38E-02 |
| <i>RNF168</i>          | 1,12  | 2,64E-03 | 3,39E-02 |
| <i>SNFT</i>            | 1,42  | 2,64E-03 | 3,39E-02 |
| <i>AK124470</i>        | -1,19 | 2,65E-03 | 3,39E-02 |
| <i>PLA2R1</i>          | -1,18 | 2,65E-03 | 3,39E-02 |
| <i>THC2365641</i>      | 1,16  | 2,65E-03 | 3,39E-02 |
| <i>AK130705</i>        | -1,38 | 2,66E-03 | 3,40E-02 |
| <i>PCDHA11</i>         | -1,36 | 2,66E-03 | 3,40E-02 |
| <i>CCL16</i>           | -1,21 | 2,66E-03 | 3,40E-02 |
| <i>PMS2L2</i>          | -1,15 | 2,67E-03 | 3,40E-02 |
| <i>THC2282854</i>      | -1,13 | 2,66E-03 | 3,40E-02 |
| <i>A_24_P812265</i>    | 1,09  | 2,66E-03 | 3,40E-02 |
| <i>MAB21L1</i>         | 1,14  | 2,66E-03 | 3,40E-02 |
| <i>THC2361427</i>      | 1,18  | 2,66E-03 | 3,40E-02 |
| <i>CDKN2D</i>          | 1,23  | 2,66E-03 | 3,40E-02 |
| <i>CENPP</i>           | 1,23  | 2,67E-03 | 3,40E-02 |
| <i>LOC90586</i>        | 1,28  | 2,66E-03 | 3,40E-02 |
| <i>A_24_P152144</i>    | 1,17  | 2,67E-03 | 3,40E-02 |
| <i>TINAGL1</i>         | 1,21  | 2,67E-03 | 3,40E-02 |
| <i>BRD8</i>            | -1,12 | 2,67E-03 | 3,40E-02 |
| <i>HIVEP2</i>          | 1,18  | 2,67E-03 | 3,40E-02 |
| <i>LARS2</i>           | -1,15 | 2,68E-03 | 3,41E-02 |
| <i>NEK7</i>            | 1,24  | 2,68E-03 | 3,41E-02 |
| <i>TCTEX1D1</i>        | 1,21  | 2,69E-03 | 3,42E-02 |
| <i>WDFY4</i>           | -1,29 | 2,69E-03 | 3,42E-02 |
| <i>THC2397850</i>      | -1,26 | 2,69E-03 | 3,42E-02 |
| <i>BQ717518</i>        | -1,21 | 2,69E-03 | 3,42E-02 |
| <i>BX415272</i>        | 1,23  | 2,70E-03 | 3,42E-02 |
| <i>HIST2H3A</i>        | 1,16  | 2,70E-03 | 3,43E-02 |
| <i>AL036373</i>        | -1,27 | 2,71E-03 | 3,43E-02 |
| <i>CDCA7L</i>          | -1,13 | 2,71E-03 | 3,43E-02 |
| <i>TMEM64</i>          | -1,27 | 2,71E-03 | 3,43E-02 |
| <i>DYSF</i>            | 1,28  | 2,73E-03 | 3,46E-02 |
| <i>KIAA0485</i>        | -1,25 | 2,73E-03 | 3,46E-02 |
| <i>AK096674</i>        | 1,16  | 2,73E-03 | 3,46E-02 |
| <i>AB002449</i>        | -1,18 | 2,74E-03 | 3,46E-02 |
| <i>HOXB3</i>           | -1,19 | 2,74E-03 | 3,46E-02 |
| <i>ENST00000357137</i> | -1,18 | 2,77E-03 | 3,50E-02 |
| <i>MGC4728</i>         | -1,16 | 2,77E-03 | 3,51E-02 |
| <i>GTF2IRD2</i>        | -1,14 | 2,78E-03 | 3,51E-02 |
| <i>APOC3</i>           | -1,13 | 2,78E-03 | 3,51E-02 |
| <i>FAM11B</i>          | 1,17  | 2,78E-03 | 3,51E-02 |
| <i>BC067077</i>        | 1,25  | 2,79E-03 | 3,53E-02 |

|                        |       |          |          |
|------------------------|-------|----------|----------|
| <i>A_24_P924908</i>    | 1,11  | 2,80E-03 | 3,54E-02 |
| <i>ENST00000298453</i> | 1,14  | 2,80E-03 | 3,54E-02 |
| <i>TPRX1</i>           | 1,11  | 2,81E-03 | 3,54E-02 |
| <i>AK097877</i>        | -1,20 | 2,81E-03 | 3,54E-02 |
| <i>ENST00000304465</i> | 1,14  | 2,81E-03 | 3,54E-02 |
| <i>U25029</i>          | -1,27 | 2,82E-03 | 3,54E-02 |
| <i>BX115350</i>        | -1,22 | 2,82E-03 | 3,54E-02 |
| <i>OSBPL1A</i>         | -1,17 | 2,82E-03 | 3,54E-02 |
| <i>THC2407068</i>      | -1,16 | 2,82E-03 | 3,54E-02 |
| <i>ARHGAP5</i>         | 1,17  | 2,82E-03 | 3,54E-02 |
| <i>AI570240</i>        | 1,50  | 2,82E-03 | 3,54E-02 |
| <i>NID2</i>            | -1,19 | 2,83E-03 | 3,55E-02 |
| <i>SMC3</i>            | -1,17 | 2,83E-03 | 3,55E-02 |
| <i>THC2403165</i>      | -1,15 | 2,83E-03 | 3,55E-02 |
| <i>MS4A4A</i>          | -1,30 | 2,83E-03 | 3,55E-02 |
| <i>PMS2</i>            | -1,10 | 2,83E-03 | 3,55E-02 |
| <i>BQ014494</i>        | 1,12  | 2,84E-03 | 3,55E-02 |
| <i>LONRF3</i>          | 1,28  | 2,84E-03 | 3,56E-02 |
| <i>LOC642819</i>       | 1,14  | 2,85E-03 | 3,56E-02 |
| <i>MYBPC1</i>          | 1,21  | 2,85E-03 | 3,56E-02 |
| <i>TMEM70</i>          | 1,41  | 2,85E-03 | 3,56E-02 |
| <i>TBX19</i>           | -1,19 | 2,86E-03 | 3,58E-02 |
| <i>AV707343</i>        | -1,20 | 2,86E-03 | 3,58E-02 |
| <i>FLJ23556</i>        | -1,22 | 2,87E-03 | 3,58E-02 |
| <i>AK095600</i>        | -1,16 | 2,87E-03 | 3,58E-02 |
| <i>SERPINB7</i>        | 1,12  | 2,87E-03 | 3,58E-02 |
| <i>THC2373821</i>      | -1,23 | 2,87E-03 | 3,58E-02 |
| <i>SMO</i>             | -1,21 | 2,87E-03 | 3,58E-02 |
| <i>SPTB</i>            | 1,23  | 2,87E-03 | 3,58E-02 |
| <i>ZNF529</i>          | -1,26 | 2,88E-03 | 3,58E-02 |
| <i>RGMA</i>            | -1,35 | 2,88E-03 | 3,58E-02 |
| <i>PTPRK</i>           | 1,13  | 2,88E-03 | 3,58E-02 |
| <i>KIAA1712</i>        | -1,17 | 2,88E-03 | 3,59E-02 |
| <i>VIM</i>             | 1,20  | 2,88E-03 | 3,59E-02 |
| <i>C1QTNF1</i>         | 1,35  | 2,89E-03 | 3,59E-02 |
| <i>GPR23</i>           | -1,17 | 2,89E-03 | 3,59E-02 |
| <i>KIAA0467</i>        | -1,11 | 2,89E-03 | 3,59E-02 |
| <i>AI911302</i>        | 1,10  | 2,90E-03 | 3,60E-02 |
| <i>LPIN1</i>           | -1,23 | 2,91E-03 | 3,61E-02 |
| <i>BC37295_3</i>       | -1,16 | 2,91E-03 | 3,61E-02 |
| <i>ENST00000334994</i> | 1,47  | 2,91E-03 | 3,61E-02 |
| <i>TCEB3C</i>          | 1,12  | 2,91E-03 | 3,61E-02 |
| <i>PPP1R3C</i>         | -1,43 | 2,92E-03 | 3,62E-02 |
| <i>LHFPL4</i>          | -1,15 | 2,93E-03 | 3,63E-02 |

|                        |       |          |          |
|------------------------|-------|----------|----------|
| <i>RPS6KB2</i>         | 1,15  | 2,93E-03 | 3,63E-02 |
| <i>HAMP</i>            | 1,19  | 2,94E-03 | 3,64E-02 |
| <i>BE082118</i>        | -1,18 | 2,94E-03 | 3,64E-02 |
| <i>THC2380397</i>      | -1,25 | 2,94E-03 | 3,64E-02 |
| <i>CCDC50</i>          | 1,13  | 2,95E-03 | 3,65E-02 |
| <i>ENST00000332814</i> | 1,13  | 2,95E-03 | 3,65E-02 |
| <i>THC2295911</i>      | 1,15  | 2,95E-03 | 3,65E-02 |
| <i>ENST00000382794</i> | -1,18 | 2,96E-03 | 3,65E-02 |
| <i>THAP1</i>           | -1,17 | 2,95E-03 | 3,65E-02 |
| <i>TOR2A</i>           | -1,10 | 2,95E-03 | 3,65E-02 |
| <i>OPA3</i>            | 1,11  | 2,96E-03 | 3,65E-02 |
| <i>MEIS2</i>           | -1,39 | 2,96E-03 | 3,65E-02 |
| <i>RAB40C</i>          | -1,15 | 2,96E-03 | 3,65E-02 |
| <i>PSD</i>             | -1,48 | 2,97E-03 | 3,65E-02 |
| <i>A_24_P281175</i>    | -1,14 | 2,97E-03 | 3,65E-02 |
| <i>THC2421885</i>      | 1,18  | 2,97E-03 | 3,66E-02 |
| <i>CB051804</i>        | 1,11  | 2,97E-03 | 3,66E-02 |
| <i>AF086017</i>        | -1,22 | 2,98E-03 | 3,67E-02 |
| <i>OGT</i>             | -1,19 | 2,98E-03 | 3,67E-02 |
| <i>ACCN3</i>           | -1,28 | 2,99E-03 | 3,68E-02 |
| <i>PPP2R2B</i>         | 1,31  | 3,00E-03 | 3,69E-02 |
| <i>THC2274016</i>      | -1,19 | 3,01E-03 | 3,69E-02 |
| <i>CD97</i>            | -1,31 | 3,01E-03 | 3,70E-02 |
| <i>THC2406192</i>      | -1,14 | 3,01E-03 | 3,70E-02 |
| <i>KIAA0562</i>        | 1,13  | 3,01E-03 | 3,70E-02 |
| <i>GZMH</i>            | -1,44 | 3,02E-03 | 3,70E-02 |
| <i>SPG20</i>           | -1,18 | 3,02E-03 | 3,70E-02 |
| <i>ENST00000317868</i> | -1,18 | 3,02E-03 | 3,70E-02 |
| <i>MCM6</i>            | -1,13 | 3,03E-03 | 3,70E-02 |
| <i>BIRC7</i>           | 1,21  | 3,02E-03 | 3,70E-02 |
| <i>AK000925</i>        | 1,26  | 3,02E-03 | 3,70E-02 |
| <i>T70285</i>          | 1,19  | 3,03E-03 | 3,71E-02 |
| <i>BC017350</i>        | -1,17 | 3,03E-03 | 3,71E-02 |
| <i>ZCCHC10</i>         | 1,15  | 3,03E-03 | 3,71E-02 |
| <i>LYSMD2</i>          | -1,13 | 3,04E-03 | 3,71E-02 |
| <i>IPO7</i>            | 1,15  | 3,04E-03 | 3,71E-02 |
| <i>AI278811</i>        | 1,40  | 3,04E-03 | 3,71E-02 |
| <i>MDFI</i>            | -1,21 | 3,05E-03 | 3,72E-02 |
| <i>ZNF539</i>          | -1,18 | 3,05E-03 | 3,72E-02 |
| <i>RP4-691N24.1</i>    | -1,18 | 3,05E-03 | 3,72E-02 |
| <i>NOD3</i>            | -1,16 | 3,05E-03 | 3,72E-02 |
| <i>SMCR7L</i>          | -1,10 | 3,05E-03 | 3,72E-02 |
| <i>FLJ44715</i>        | 1,11  | 3,05E-03 | 3,72E-02 |
| <i>THC2316936</i>      | -1,22 | 3,05E-03 | 3,72E-02 |

|                        |       |          |          |
|------------------------|-------|----------|----------|
| <i>GLUD2</i>           | 1,14  | 3,05E-03 | 3,72E-02 |
| <i>GRM2</i>            | 1,11  | 3,06E-03 | 3,73E-02 |
| <i>ERF</i>             | 1,29  | 3,06E-03 | 3,73E-02 |
| <i>AF088004</i>        | -1,41 | 3,06E-03 | 3,73E-02 |
| <i>LSP1</i>            | -1,18 | 3,07E-03 | 3,73E-02 |
| <i>CRIP2</i>           | 1,23  | 3,07E-03 | 3,73E-02 |
| <i>ARL11</i>           | -1,09 | 3,07E-03 | 3,73E-02 |
| <i>C16orf63</i>        | -1,11 | 3,08E-03 | 3,74E-02 |
| <i>DB340110</i>        | 1,29  | 3,08E-03 | 3,74E-02 |
| <i>LOC283701</i>       | -1,25 | 3,09E-03 | 3,75E-02 |
| <i>NOTCH2NL</i>        | -1,20 | 3,09E-03 | 3,75E-02 |
| <i>CEP27</i>           | 1,12  | 3,09E-03 | 3,75E-02 |
| <i>UNQ9438</i>         | 1,23  | 3,09E-03 | 3,75E-02 |
| <i>FNBP4</i>           | -1,17 | 3,10E-03 | 3,75E-02 |
| <i>A_23_P72330</i>     | -1,92 | 3,10E-03 | 3,76E-02 |
| <i>SYNJ2BP</i>         | 1,10  | 3,10E-03 | 3,76E-02 |
| <i>PDE8B</i>           | -1,49 | 3,10E-03 | 3,76E-02 |
| <i>NCOA2</i>           | 1,15  | 3,11E-03 | 3,76E-02 |
| <i>THC2337271</i>      | 1,09  | 3,11E-03 | 3,76E-02 |
| <i>BQ424374</i>        | 1,32  | 3,11E-03 | 3,76E-02 |
| <i>KIAA1683</i>        | 1,53  | 3,11E-03 | 3,76E-02 |
| <i>TSPYL3</i>          | -1,15 | 3,11E-03 | 3,76E-02 |
| <i>C9orf43</i>         | -1,13 | 3,11E-03 | 3,76E-02 |
| <i>LOC653284</i>       | -1,18 | 3,13E-03 | 3,77E-02 |
| <i>RAD52</i>           | -1,16 | 3,12E-03 | 3,77E-02 |
| <i>HOM-TES-103</i>     | -1,14 | 3,13E-03 | 3,77E-02 |
| <i>PECI</i>            | -1,09 | 3,12E-03 | 3,77E-02 |
| <i>IGSF4C</i>          | 1,14  | 3,13E-03 | 3,77E-02 |
| <i>ENST00000314088</i> | -1,30 | 3,13E-03 | 3,77E-02 |
| <i>PCDHA8</i>          | 1,23  | 3,13E-03 | 3,77E-02 |
| <i>PTHLH</i>           | 1,58  | 3,14E-03 | 3,78E-02 |
| <i>EGR2</i>            | 1,99  | 3,14E-03 | 3,78E-02 |
| <i>ZNF74</i>           | -1,19 | 3,15E-03 | 3,79E-02 |
| <i>AF063695</i>        | -1,59 | 3,15E-03 | 3,79E-02 |
| <i>PMS2L1</i>          | -1,15 | 3,16E-03 | 3,79E-02 |
| <i>ENST00000275546</i> | -1,13 | 3,16E-03 | 3,79E-02 |
| <i>LOC442578</i>       | -1,26 | 3,16E-03 | 3,79E-02 |
| <i>DIO3</i>            | -1,40 | 3,16E-03 | 3,80E-02 |
| <i>PTPRN2</i>          | -1,19 | 3,17E-03 | 3,80E-02 |
| <i>A_24_P929650</i>    | 1,22  | 3,17E-03 | 3,80E-02 |
| <i>A_24_P607645</i>    | -1,14 | 3,17E-03 | 3,80E-02 |
| <i>THC2307122</i>      | 1,15  | 3,18E-03 | 3,81E-02 |
| <i>LRRC8D</i>          | -1,27 | 3,18E-03 | 3,81E-02 |
| <i>BC104421</i>        | -1,28 | 3,19E-03 | 3,81E-02 |

|                        |       |          |          |
|------------------------|-------|----------|----------|
| <i>NUP133</i>          | -1,09 | 3,19E-03 | 3,82E-02 |
| <i>GGA3</i>            | -1,11 | 3,19E-03 | 3,82E-02 |
| <i>GPR85</i>           | 1,11  | 3,19E-03 | 3,82E-02 |
| <i>MGC40579</i>        | -1,11 | 3,19E-03 | 3,82E-02 |
| <i>ENST00000368599</i> | 1,22  | 3,20E-03 | 3,83E-02 |
| <i>THC2325383</i>      | 1,10  | 3,21E-03 | 3,83E-02 |
| <i>ANP32D</i>          | 1,11  | 3,22E-03 | 3,84E-02 |
| <i>SEC14L1</i>         | 1,14  | 3,22E-03 | 3,84E-02 |
| <i>FLJ33360</i>        | -1,19 | 3,22E-03 | 3,84E-02 |
| <i>SIGLECP3</i>        | -1,43 | 3,22E-03 | 3,85E-02 |
| <i>THC2403644</i>      | -1,22 | 3,24E-03 | 3,86E-02 |
| <i>CD24</i>            | -1,81 | 3,25E-03 | 3,87E-02 |
| <i>XCL1</i>            | -1,38 | 3,25E-03 | 3,87E-02 |
| <i>THC2263894</i>      | 1,20  | 3,25E-03 | 3,87E-02 |
| <i>THC2313599</i>      | -1,22 | 3,26E-03 | 3,88E-02 |
| <i>ORF1-FL49</i>       | 1,13  | 3,26E-03 | 3,88E-02 |
| <i>FTMT</i>            | 1,14  | 3,26E-03 | 3,88E-02 |
| <i>EDG3</i>            | 1,16  | 3,26E-03 | 3,88E-02 |
| <i>FAM101A</i>         | -2,07 | 3,28E-03 | 3,89E-02 |
| <i>KIT</i>             | -1,44 | 3,28E-03 | 3,89E-02 |
| <i>HHEX</i>            | -1,34 | 3,28E-03 | 3,89E-02 |
| <i>A_24_P903378</i>    | 1,08  | 3,28E-03 | 3,89E-02 |
| <i>LACE1</i>           | 1,12  | 3,28E-03 | 3,89E-02 |
| <i>USP15</i>           | 1,12  | 3,28E-03 | 3,89E-02 |
| <i>TMEM16A</i>         | 1,41  | 3,28E-03 | 3,89E-02 |
| <i>A_32_P136477</i>    | -1,15 | 3,30E-03 | 3,91E-02 |
| <i>OBSCN</i>           | -1,14 | 3,31E-03 | 3,92E-02 |
| <i>AJ005814</i>        | -1,23 | 3,31E-03 | 3,92E-02 |
| <i>ENST00000283964</i> | 1,25  | 3,31E-03 | 3,92E-02 |
| <i>AK074181</i>        | 1,28  | 3,32E-03 | 3,93E-02 |
| <i>U77706</i>          | 1,21  | 3,32E-03 | 3,93E-02 |
| <i>ENTPD3</i>          | -1,42 | 3,33E-03 | 3,93E-02 |
| <i>MAPRE2</i>          | 1,16  | 3,33E-03 | 3,93E-02 |
| <i>A_24_P409816</i>    | 1,12  | 3,33E-03 | 3,94E-02 |
| <i>ZFP14</i>           | -1,32 | 3,33E-03 | 3,94E-02 |
| <i>SCHIP1</i>          | 1,54  | 3,33E-03 | 3,94E-02 |
| <i>CA8</i>             | 1,18  | 3,34E-03 | 3,95E-02 |
| <i>CD200</i>           | 1,42  | 3,36E-03 | 3,96E-02 |
| <i>AK055960</i>        | -1,12 | 3,36E-03 | 3,96E-02 |
| <i>KIAA1644</i>        | -1,56 | 3,37E-03 | 3,97E-02 |
| <i>C6orf136</i>        | -1,12 | 3,37E-03 | 3,97E-02 |
| <i>MEF2A</i>           | 1,21  | 3,37E-03 | 3,97E-02 |
| <i>BDKRB1</i>          | 1,81  | 3,37E-03 | 3,97E-02 |
| <i>BU726029</i>        | 1,37  | 3,38E-03 | 3,98E-02 |

|                        |       |          |          |
|------------------------|-------|----------|----------|
| <i>THC2349681</i>      | -1,31 | 3,38E-03 | 3,98E-02 |
| <i>MMP19</i>           | 1,35  | 3,38E-03 | 3,98E-02 |
| <i>FANCL</i>           | -1,22 | 3,39E-03 | 3,99E-02 |
| <i>NUP50</i>           | -1,14 | 3,40E-03 | 3,99E-02 |
| <i>TBX21</i>           | -1,20 | 3,40E-03 | 4,00E-02 |
| <i>ASB13</i>           | -1,14 | 3,40E-03 | 4,00E-02 |
| <i>THC2440229</i>      | -1,36 | 3,40E-03 | 4,00E-02 |
| <i>AK098220</i>        | -1,36 | 3,41E-03 | 4,00E-02 |
| <i>DNAJC18</i>         | 1,15  | 3,41E-03 | 4,00E-02 |
| <i>TRAF4</i>           | 1,25  | 3,41E-03 | 4,00E-02 |
| <i>CCL2</i>            | 2,65  | 3,42E-03 | 4,01E-02 |
| <i>A_24_P384379</i>    | -1,13 | 3,42E-03 | 4,01E-02 |
| <i>THC2398355</i>      | 1,28  | 3,43E-03 | 4,02E-02 |
| <i>IGHV1-69</i>        | -1,62 | 3,43E-03 | 4,02E-02 |
| <i>NOL11</i>           | -1,12 | 3,43E-03 | 4,02E-02 |
| <i>FLJ38663</i>        | -1,18 | 3,43E-03 | 4,02E-02 |
| <i>ARPC1A</i>          | -1,13 | 3,44E-03 | 4,02E-02 |
| <i>YWHAZ</i>           | 1,15  | 3,44E-03 | 4,02E-02 |
| <i>CGI-38</i>          | 1,38  | 3,44E-03 | 4,03E-02 |
| <i>A_24_P255845</i>    | 1,13  | 3,45E-03 | 4,03E-02 |
| <i>A_24_P67432</i>     | 1,20  | 3,45E-03 | 4,03E-02 |
| <i>ZNF641</i>          | -1,12 | 3,45E-03 | 4,03E-02 |
| <i>BE505021</i>        | 1,13  | 3,46E-03 | 4,04E-02 |
| <i>THC2287577</i>      | -1,32 | 3,46E-03 | 4,04E-02 |
| <i>THC2304550</i>      | 1,44  | 3,46E-03 | 4,04E-02 |
| <i>FHL1</i>            | 1,42  | 3,47E-03 | 4,04E-02 |
| <i>AK023645</i>        | -1,19 | 3,47E-03 | 4,04E-02 |
| <i>AK097118</i>        | -1,15 | 3,47E-03 | 4,04E-02 |
| <i>ALDH1B1</i>         | 1,59  | 3,47E-03 | 4,04E-02 |
| <i>SCYL1BP1</i>        | -1,15 | 3,48E-03 | 4,05E-02 |
| <i>THC2403217</i>      | -1,17 | 3,49E-03 | 4,06E-02 |
| <i>BC008618</i>        | -1,16 | 3,50E-03 | 4,06E-02 |
| <i>SNRPB</i>           | 1,12  | 3,49E-03 | 4,06E-02 |
| <i>THC2274051</i>      | 1,15  | 3,50E-03 | 4,06E-02 |
| <i>PLXNA1</i>          | -1,20 | 3,50E-03 | 4,06E-02 |
| <i>A2M</i>             | 1,21  | 3,50E-03 | 4,06E-02 |
| <i>PAWR</i>            | 1,29  | 3,50E-03 | 4,07E-02 |
| <i>ENST00000375180</i> | -1,14 | 3,51E-03 | 4,07E-02 |
| <i>CA13</i>            | 1,25  | 3,51E-03 | 4,08E-02 |
| <i>BQ365891</i>        | 1,17  | 3,52E-03 | 4,08E-02 |
| <i>HIC2</i>            | -1,12 | 3,52E-03 | 4,08E-02 |
| <i>C8orf76</i>         | -1,12 | 3,52E-03 | 4,08E-02 |
| <i>PHF15</i>           | -1,12 | 3,52E-03 | 4,08E-02 |
| <i>THC2364429</i>      | -1,17 | 3,53E-03 | 4,08E-02 |

|                        |       |          |          |
|------------------------|-------|----------|----------|
| <i>BC042172</i>        | -1,19 | 3,53E-03 | 4,08E-02 |
| <i>PRPF18</i>          | 1,10  | 3,53E-03 | 4,08E-02 |
| <i>NT5E</i>            | -1,28 | 3,54E-03 | 4,10E-02 |
| <i>CTTNBP2NL</i>       | 1,12  | 3,54E-03 | 4,10E-02 |
| <i>ENST00000379879</i> | -2,13 | 3,55E-03 | 4,10E-02 |
| <i>CRSP7</i>           | -1,10 | 3,55E-03 | 4,10E-02 |
| <i>BE044472</i>        | 1,11  | 3,55E-03 | 4,10E-02 |
| <i>CFHR1</i>           | 1,57  | 3,55E-03 | 4,10E-02 |
| <i>CD33</i>            | -1,33 | 3,56E-03 | 4,11E-02 |
| <i>THC2442489</i>      | -1,21 | 3,56E-03 | 4,11E-02 |
| <i>DNTTIP2</i>         | 1,15  | 3,56E-03 | 4,11E-02 |
| <i>CARD14</i>          | -1,18 | 3,57E-03 | 4,11E-02 |
| <i>FAM109A</i>         | -1,09 | 3,57E-03 | 4,11E-02 |
| <i>FLJ32214</i>        | 1,12  | 3,57E-03 | 4,11E-02 |
| <i>SLC16A4</i>         | 1,19  | 3,57E-03 | 4,11E-02 |
| <i>ZNF248</i>          | -1,21 | 3,58E-03 | 4,12E-02 |
| <i>MPZL1</i>           | -1,14 | 3,58E-03 | 4,12E-02 |
| <i>EIF5</i>            | 1,14  | 3,58E-03 | 4,12E-02 |
| <i>TNFRSF25</i>        | -1,19 | 3,58E-03 | 4,12E-02 |
| <i>TTL</i>             | 1,13  | 3,59E-03 | 4,12E-02 |
| <i>IRF1</i>            | 1,67  | 3,59E-03 | 4,12E-02 |
| <i>CDGAP</i>           | 1,14  | 3,59E-03 | 4,13E-02 |
| <i>A_32_P173922</i>    | 1,17  | 3,59E-03 | 4,13E-02 |
| <i>THC2316649</i>      | -1,22 | 3,60E-03 | 4,13E-02 |
| <i>PYHIN1</i>          | -1,12 | 3,60E-03 | 4,13E-02 |
| <i>CIDEB</i>           | -1,12 | 3,60E-03 | 4,13E-02 |
| <i>BC040412</i>        | 1,20  | 3,60E-03 | 4,13E-02 |
| <i>AASDHPPT</i>        | -1,14 | 3,60E-03 | 4,13E-02 |
| <i>FLJ11236</i>        | -1,11 | 3,60E-03 | 4,13E-02 |
| <i>CPT1A</i>           | 1,22  | 3,60E-03 | 4,13E-02 |
| <i>CBLN2</i>           | -1,30 | 3,61E-03 | 4,13E-02 |
| <i>S100BPB</i>         | -1,14 | 3,61E-03 | 4,13E-02 |
| <i>PRF1</i>            | -1,13 | 3,61E-03 | 4,13E-02 |
| <i>DGCR8</i>           | -1,20 | 3,63E-03 | 4,14E-02 |
| <i>THC2344420</i>      | -1,19 | 3,63E-03 | 4,14E-02 |
| <i>AA827683</i>        | -1,16 | 3,63E-03 | 4,14E-02 |
| <i>AL582976</i>        | 1,12  | 3,62E-03 | 4,14E-02 |
| <i>GOPC</i>            | -1,16 | 3,63E-03 | 4,15E-02 |
| <i>LOC283658</i>       | -1,21 | 3,64E-03 | 4,15E-02 |
| <i>ARFGEF2</i>         | 1,24  | 3,64E-03 | 4,16E-02 |
| <i>AI937300</i>        | -1,23 | 3,65E-03 | 4,16E-02 |
| <i>BC001783</i>        | -1,16 | 3,65E-03 | 4,16E-02 |
| <i>NAGS</i>            | -1,14 | 3,65E-03 | 4,16E-02 |
| <i>SON</i>             | -1,12 | 3,65E-03 | 4,16E-02 |

|                        |       |          |          |
|------------------------|-------|----------|----------|
| <i>PLEKHO1</i>         | 1,27  | 3,65E-03 | 4,16E-02 |
| <i>THC2403913</i>      | -1,21 | 3,66E-03 | 4,16E-02 |
| <i>BC040577</i>        | -1,16 | 3,66E-03 | 4,16E-02 |
| <i>THC2319172</i>      | -1,15 | 3,66E-03 | 4,16E-02 |
| <i>ZNF434</i>          | -1,14 | 3,66E-03 | 4,16E-02 |
| <i>THC2340061</i>      | 1,07  | 3,66E-03 | 4,16E-02 |
| <i>CR595668</i>        | 1,15  | 3,66E-03 | 4,16E-02 |
| <i>A_32_P163594</i>    | -1,19 | 3,67E-03 | 4,16E-02 |
| <i>MTMR6</i>           | 1,15  | 3,67E-03 | 4,16E-02 |
| <i>ENST00000305820</i> | -1,24 | 3,67E-03 | 4,17E-02 |
| <i>RUNX1T1</i>         | -1,24 | 3,68E-03 | 4,18E-02 |
| <i>BX109999</i>        | -1,12 | 3,69E-03 | 4,18E-02 |
| <i>A_24_P810074</i>    | 1,13  | 3,69E-03 | 4,18E-02 |
| <i>ENST00000317829</i> | 1,14  | 3,69E-03 | 4,18E-02 |
| <i>AMOT</i>            | -1,25 | 3,70E-03 | 4,19E-02 |
| <i>A_32_P73580</i>     | -1,20 | 3,70E-03 | 4,19E-02 |
| <i>THC2347074</i>      | -1,15 | 3,70E-03 | 4,19E-02 |
| <i>AL526449</i>        | 1,10  | 3,70E-03 | 4,19E-02 |
| <i>A_24_P6850</i>      | 1,25  | 3,70E-03 | 4,19E-02 |
| <i>ENST00000355570</i> | -1,19 | 3,71E-03 | 4,19E-02 |
| <i>GPR125</i>          | -1,15 | 3,71E-03 | 4,19E-02 |
| <i>SLTM</i>            | -1,11 | 3,71E-03 | 4,19E-02 |
| <i>POLR3H</i>          | -1,11 | 3,71E-03 | 4,19E-02 |
| <i>TAAR2</i>           | 1,15  | 3,71E-03 | 4,19E-02 |
| <i>CENPN</i>           | 1,19  | 3,71E-03 | 4,19E-02 |
| <i>BC013679</i>        | 1,13  | 3,71E-03 | 4,19E-02 |
| <i>THC2314522</i>      | -1,17 | 3,72E-03 | 4,20E-02 |
| <i>DISP1</i>           | -1,12 | 3,73E-03 | 4,20E-02 |
| <i>AY358807</i>        | 1,12  | 3,73E-03 | 4,20E-02 |
| <i>COBL</i>            | 1,25  | 3,73E-03 | 4,21E-02 |
| <i>SSR2</i>            | -1,14 | 3,74E-03 | 4,22E-02 |
| <i>TMEM136</i>         | 1,18  | 3,74E-03 | 4,22E-02 |
| <i>BC027922</i>        | -1,21 | 3,75E-03 | 4,22E-02 |
| <i>RAB6A</i>           | 1,11  | 3,75E-03 | 4,22E-02 |
| <i>ENST00000361567</i> | 1,16  | 3,75E-03 | 4,22E-02 |
| <i>39142</i>           | 1,17  | 3,75E-03 | 4,22E-02 |
| <i>SLC16A3</i>         | 1,25  | 3,75E-03 | 4,22E-02 |
| <i>LOC157562</i>       | -1,22 | 3,76E-03 | 4,23E-02 |
| <i>C20orf54</i>        | 1,21  | 3,77E-03 | 4,24E-02 |
| <i>REM1</i>            | -1,17 | 3,78E-03 | 4,24E-02 |
| <i>FLJ31875</i>        | -1,15 | 3,78E-03 | 4,24E-02 |
| <i>GP5</i>             | -1,10 | 3,78E-03 | 4,24E-02 |
| <i>FAM80A</i>          | 1,25  | 3,78E-03 | 4,24E-02 |
| <i>AHR</i>             | 1,31  | 3,79E-03 | 4,25E-02 |



|                        |       |          |          |
|------------------------|-------|----------|----------|
| <i>L40520</i>          | -1,44 | 3,79E-03 | 4,25E-02 |
| <i>BC028022</i>        | -1,20 | 3,79E-03 | 4,25E-02 |
| <i>PBX1</i>            | -1,16 | 3,80E-03 | 4,26E-02 |
| <i>FLJ43663</i>        | 1,24  | 3,80E-03 | 4,26E-02 |
| <i>NFYA</i>            | 1,19  | 3,81E-03 | 4,26E-02 |
| <i>DDX24</i>           | 1,11  | 3,81E-03 | 4,27E-02 |
| <i>AF289600</i>        | 1,22  | 3,81E-03 | 4,27E-02 |
| <i>C3AR1</i>           | 1,10  | 3,82E-03 | 4,27E-02 |
| <i>ZNF225</i>          | -1,13 | 3,82E-03 | 4,27E-02 |
| <i>HINT3</i>           | 1,15  | 3,83E-03 | 4,28E-02 |
| <i>A_32_P109645</i>    | 1,78  | 3,83E-03 | 4,28E-02 |
| <i>FAM20B</i>          | 1,11  | 3,84E-03 | 4,28E-02 |
| <i>AP3M2</i>           | -1,13 | 3,84E-03 | 4,28E-02 |
| <i>TOR1AIP1</i>        | 1,12  | 3,85E-03 | 4,29E-02 |
| <i>ZNF642</i>          | -1,15 | 3,85E-03 | 4,30E-02 |
| <i>AA767131</i>        | -1,13 | 3,85E-03 | 4,30E-02 |
| <i>ZNF343</i>          | -1,11 | 3,86E-03 | 4,31E-02 |
| <i>ENST00000382002</i> | -1,25 | 3,88E-03 | 4,32E-02 |
| <i>C1orf35</i>         | -1,17 | 3,88E-03 | 4,32E-02 |
| <i>DOC2B</i>           | 1,18  | 3,88E-03 | 4,32E-02 |
| <i>AV652851</i>        | -1,18 | 3,91E-03 | 4,34E-02 |
| <i>ENST00000382921</i> | -1,16 | 3,90E-03 | 4,34E-02 |
| <i>SLC12A9</i>         | -1,09 | 3,91E-03 | 4,34E-02 |
| <i>CSDE1</i>           | 1,11  | 3,90E-03 | 4,34E-02 |
| <i>DDA1</i>            | 1,12  | 3,91E-03 | 4,34E-02 |
| <i>AKAP6</i>           | 1,18  | 3,90E-03 | 4,34E-02 |
| <i>PTPN5</i>           | 1,20  | 3,90E-03 | 4,34E-02 |
| <i>ACR</i>             | 1,23  | 3,91E-03 | 4,34E-02 |
| <i>BG612665</i>        | -1,18 | 3,91E-03 | 4,34E-02 |
| <i>SLCO4A1</i>         | 1,39  | 3,92E-03 | 4,35E-02 |
| <i>C13orf8</i>         | -1,16 | 3,92E-03 | 4,35E-02 |
| <i>A_32_P31580</i>     | -1,16 | 3,92E-03 | 4,35E-02 |
| <i>KCNK6</i>           | -1,45 | 3,93E-03 | 4,35E-02 |
| <i>THC2311626</i>      | -1,14 | 3,94E-03 | 4,37E-02 |
| <i>ENPP4</i>           | 1,20  | 3,95E-03 | 4,37E-02 |
| <i>A_32_P44831</i>     | -1,23 | 3,95E-03 | 4,38E-02 |
| <i>MFAP3</i>           | 1,14  | 3,95E-03 | 4,38E-02 |
| <i>RPIA</i>            | -1,15 | 3,97E-03 | 4,39E-02 |
| <i>COL4A1</i>          | 1,28  | 3,97E-03 | 4,39E-02 |
| <i>KYNU</i>            | 1,29  | 3,97E-03 | 4,39E-02 |
| <i>BMP2</i>            | 1,29  | 3,97E-03 | 4,39E-02 |
| <i>AK022110</i>        | -1,21 | 3,98E-03 | 4,39E-02 |
| <i>MKI67IP</i>         | -1,14 | 3,98E-03 | 4,39E-02 |
| <i>TRA2A</i>           | -1,12 | 3,98E-03 | 4,39E-02 |

|                        |       |          |          |
|------------------------|-------|----------|----------|
| <i>COL15A1</i>         | 1,24  | 3,98E-03 | 4,39E-02 |
| <i>ACO1</i>            | -1,15 | 3,99E-03 | 4,40E-02 |
| <i>RAPGEF4</i>         | 1,20  | 3,99E-03 | 4,40E-02 |
| <i>A_32_P116303</i>    | -1,16 | 3,99E-03 | 4,40E-02 |
| <i>DLGAP4</i>          | 1,13  | 4,00E-03 | 4,40E-02 |
| <i>A_23_P301803</i>    | 1,18  | 3,99E-03 | 4,40E-02 |
| <i>ENST00000374395</i> | 1,19  | 3,99E-03 | 4,40E-02 |
| <i>MAPK7</i>           | -1,09 | 4,00E-03 | 4,41E-02 |
| <i>THC2440409</i>      | -1,17 | 4,01E-03 | 4,41E-02 |
| <i>RP11-262H14.4</i>   | -1,20 | 4,01E-03 | 4,41E-02 |
| <i>MAGEL2</i>          | -1,34 | 4,02E-03 | 4,42E-02 |
| <i>FLJ40432</i>        | 1,22  | 4,02E-03 | 4,42E-02 |
| <i>MSL2L1</i>          | -1,15 | 4,03E-03 | 4,43E-02 |
| <i>RECK</i>            | -1,14 | 4,03E-03 | 4,43E-02 |
| <i>A_32_P20613</i>     | 1,29  | 4,04E-03 | 4,43E-02 |
| <i>C1orf25</i>         | -1,17 | 4,05E-03 | 4,44E-02 |
| <i>THC2364469</i>      | -1,13 | 4,05E-03 | 4,45E-02 |
| <i>BQ071182</i>        | -1,12 | 4,05E-03 | 4,45E-02 |
| <i>FMN1</i>            | -1,21 | 4,06E-03 | 4,45E-02 |
| <i>TNFSF13</i>         | -1,19 | 4,07E-03 | 4,46E-02 |
| <i>THC2408073</i>      | -1,22 | 4,07E-03 | 4,46E-02 |
| <i>THC2373516</i>      | 1,20  | 4,07E-03 | 4,46E-02 |
| <i>ENST00000307662</i> | 1,28  | 4,07E-03 | 4,46E-02 |
| <i>A_24_P367282</i>    | -1,19 | 4,08E-03 | 4,46E-02 |
| <i>C10orf33</i>        | -1,20 | 4,08E-03 | 4,47E-02 |
| <i>GCH1</i>            | 1,16  | 4,09E-03 | 4,47E-02 |
| <i>BX112278</i>        | -1,16 | 4,10E-03 | 4,48E-02 |
| <i>UPP1</i>            | 1,29  | 4,10E-03 | 4,48E-02 |
| <i>PTGDR</i>           | -1,25 | 4,10E-03 | 4,48E-02 |
| <i>LOC344595</i>       | -1,18 | 4,10E-03 | 4,48E-02 |
| <i>N47494</i>          | 1,13  | 4,11E-03 | 4,48E-02 |
| <i>TCF3</i>            | -1,11 | 4,11E-03 | 4,48E-02 |
| <i>THC2314513</i>      | 1,20  | 4,11E-03 | 4,49E-02 |
| <i>THUMPD2</i>         | -1,17 | 4,12E-03 | 4,50E-02 |
| <i>THC2282546</i>      | -1,14 | 4,13E-03 | 4,50E-02 |
| <i>SHPRH</i>           | -1,14 | 4,13E-03 | 4,50E-02 |
| <i>NIF3L1</i>          | -1,10 | 4,13E-03 | 4,50E-02 |
| <i>AK096255</i>        | 1,27  | 4,12E-03 | 4,50E-02 |
| <i>RGL1</i>            | -1,16 | 4,13E-03 | 4,50E-02 |
| <i>FAM26B</i>          | -1,15 | 4,13E-03 | 4,50E-02 |
| <i>CHKA</i>            | -1,13 | 4,13E-03 | 4,50E-02 |
| <i>A_23_P113056</i>    | -1,54 | 4,14E-03 | 4,50E-02 |
| <i>ZMYM1</i>           | -1,17 | 4,14E-03 | 4,50E-02 |
| <i>RPAP1</i>           | -1,11 | 4,14E-03 | 4,50E-02 |

|                        |       |          |          |
|------------------------|-------|----------|----------|
| <i>RRP22</i>           | 1,47  | 4,14E-03 | 4,50E-02 |
| <i>THC2344838</i>      | -1,55 | 4,14E-03 | 4,50E-02 |
| <i>RIOK2</i>           | -1,10 | 4,15E-03 | 4,50E-02 |
| <i>C14orf113</i>       | -1,18 | 4,15E-03 | 4,50E-02 |
| <i>ENST00000357529</i> | 1,14  | 4,15E-03 | 4,50E-02 |
| <i>DNAJA1</i>          | 1,19  | 4,16E-03 | 4,52E-02 |
| <i>THC2374470</i>      | -1,21 | 4,17E-03 | 4,52E-02 |
| <i>AK002066</i>        | -1,15 | 4,18E-03 | 4,53E-02 |
| <i>NEU1</i>            | 1,18  | 4,18E-03 | 4,53E-02 |
| <i>ENST00000380901</i> | 1,24  | 4,18E-03 | 4,53E-02 |
| <i>A_24_P413286</i>    | -1,29 | 4,19E-03 | 4,54E-02 |
| <i>PCTP</i>            | -1,17 | 4,20E-03 | 4,54E-02 |
| <i>CNOT4</i>           | -1,10 | 4,20E-03 | 4,54E-02 |
| <i>LOC148915</i>       | -1,10 | 4,20E-03 | 4,54E-02 |
| <i>EAF1</i>            | 1,11  | 4,20E-03 | 4,54E-02 |
| <i>A_24_P306355</i>    | 1,18  | 4,21E-03 | 4,55E-02 |
| <i>AK123310</i>        | -1,17 | 4,22E-03 | 4,55E-02 |
| <i>PRRX2</i>           | 1,33  | 4,22E-03 | 4,55E-02 |
| <i>CR616845</i>        | 1,34  | 4,22E-03 | 4,55E-02 |
| <i>THC2363615</i>      | -1,39 | 4,22E-03 | 4,56E-02 |
| <i>LRP12</i>           | 1,15  | 4,22E-03 | 4,56E-02 |
| <i>C1GALT1</i>         | 1,11  | 4,23E-03 | 4,56E-02 |
| <i>AQR</i>             | -1,10 | 4,23E-03 | 4,56E-02 |
| <i>BC046172</i>        | 1,17  | 4,23E-03 | 4,56E-02 |
| <i>C10orf72</i>        | -1,13 | 4,23E-03 | 4,56E-02 |
| <i>C3orf31</i>         | -1,14 | 4,24E-03 | 4,56E-02 |
| <i>HIG2</i>            | -1,21 | 4,25E-03 | 4,57E-02 |
| <i>H2AFY2</i>          | -1,15 | 4,26E-03 | 4,59E-02 |
| <i>A_32_P26721</i>     | -1,26 | 4,26E-03 | 4,59E-02 |
| <i>ENST00000316131</i> | -1,21 | 4,27E-03 | 4,59E-02 |
| <i>RCOR1</i>           | -1,12 | 4,27E-03 | 4,59E-02 |
| <i>ChGn</i>            | 1,22  | 4,28E-03 | 4,60E-02 |
| <i>ZNF429</i>          | -1,19 | 4,29E-03 | 4,61E-02 |
| <i>PLSCR3</i>          | -1,13 | 4,29E-03 | 4,61E-02 |
| <i>A_32_P38228</i>     | -1,17 | 4,31E-03 | 4,62E-02 |
| <i>PPP4R1</i>          | 1,12  | 4,30E-03 | 4,62E-02 |
| <i>KCMF1</i>           | 1,13  | 4,31E-03 | 4,62E-02 |
| <i>TMEM38A</i>         | 1,13  | 4,30E-03 | 4,62E-02 |
| <i>LOC643159</i>       | 1,17  | 4,31E-03 | 4,62E-02 |
| <i>IER3</i>            | 1,95  | 4,30E-03 | 4,62E-02 |
| <i>FLJ13391</i>        | -1,17 | 4,31E-03 | 4,62E-02 |
| <i>STX2</i>            | 1,20  | 4,31E-03 | 4,62E-02 |
| <i>AF471454</i>        | -2,60 | 4,32E-03 | 4,62E-02 |
| <i>PPP2R5A</i>         | 1,11  | 4,32E-03 | 4,62E-02 |

|                        |       |          |          |
|------------------------|-------|----------|----------|
| <i>AK022066</i>        | 1,13  | 4,32E-03 | 4,62E-02 |
| <i>ENST00000361542</i> | -1,11 | 4,33E-03 | 4,63E-02 |
| <i>KIAA1450</i>        | 1,18  | 4,33E-03 | 4,63E-02 |
| <i>DW443340</i>        | 1,23  | 4,33E-03 | 4,63E-02 |
| <i>AGTR1</i>           | -1,36 | 4,36E-03 | 4,66E-02 |
| <i>FLJ32206</i>        | -1,09 | 4,36E-03 | 4,66E-02 |
| <i>HNRPA0</i>          | 1,15  | 4,36E-03 | 4,66E-02 |
| <i>RBP1</i>            | -1,57 | 4,37E-03 | 4,66E-02 |
| <i>LOC400456</i>       | 1,27  | 4,37E-03 | 4,66E-02 |
| <i>CXCL3</i>           | 1,64  | 4,37E-03 | 4,66E-02 |
| <i>DOT1L</i>           | 1,15  | 4,38E-03 | 4,67E-02 |
| <i>THC2332864</i>      | -1,12 | 4,39E-03 | 4,67E-02 |
| <i>ZNF268</i>          | -1,12 | 4,38E-03 | 4,67E-02 |
| <i>CD38</i>            | -1,32 | 4,39E-03 | 4,67E-02 |
| <i>AK095472</i>        | -1,21 | 4,39E-03 | 4,68E-02 |
| <i>HVCN1</i>           | -1,15 | 4,39E-03 | 4,68E-02 |
| <i>THC2377582</i>      | 1,15  | 4,41E-03 | 4,69E-02 |
| <i>THC2371963</i>      | 2,80  | 4,41E-03 | 4,69E-02 |
| <i>A_24_P540555</i>    | 1,14  | 4,42E-03 | 4,70E-02 |
| <i>ZNF623</i>          | -1,17 | 4,42E-03 | 4,70E-02 |
| <i>ENC1</i>            | 1,45  | 4,42E-03 | 4,70E-02 |
| <i>RAB3C</i>           | 1,53  | 4,42E-03 | 4,70E-02 |
| <i>MICAL-L2</i>        | 1,28  | 4,44E-03 | 4,71E-02 |
| <i>KLF6</i>            | 1,46  | 4,44E-03 | 4,71E-02 |
| <i>AW015426</i>        | -1,18 | 4,45E-03 | 4,72E-02 |
| <i>OPTN</i>            | 1,15  | 4,45E-03 | 4,72E-02 |
| <i>C12orf33</i>        | 1,15  | 4,45E-03 | 4,72E-02 |
| <i>THC2377644</i>      | -1,13 | 4,46E-03 | 4,72E-02 |
| <i>KRT17</i>           | 2,01  | 4,46E-03 | 4,72E-02 |
| <i>ZNF670</i>          | 1,11  | 4,46E-03 | 4,73E-02 |
| <i>THC2379364</i>      | -1,19 | 4,47E-03 | 4,73E-02 |
| <i>RPS6KA3</i>         | 1,11  | 4,47E-03 | 4,74E-02 |
| <i>FLJ25006</i>        | -1,17 | 4,48E-03 | 4,74E-02 |
| <i>MARK1</i>           | 1,22  | 4,48E-03 | 4,74E-02 |
| <i>THC2382264</i>      | -1,22 | 4,50E-03 | 4,75E-02 |
| <i>FLJ20125</i>        | -1,14 | 4,50E-03 | 4,75E-02 |
| <i>A_24_P477610</i>    | 1,08  | 4,50E-03 | 4,75E-02 |
| <i>ENST00000360329</i> | -1,29 | 4,51E-03 | 4,76E-02 |
| <i>A_24_P483956</i>    | 1,15  | 4,51E-03 | 4,76E-02 |
| <i>AK057476</i>        | -1,17 | 4,52E-03 | 4,77E-02 |
| <i>THC2379691</i>      | 1,13  | 4,52E-03 | 4,77E-02 |
| <i>ABP1</i>            | 1,11  | 4,52E-03 | 4,77E-02 |
| <i>C14orf32</i>        | 1,12  | 4,52E-03 | 4,77E-02 |
| <i>PICALM</i>          | 1,16  | 4,52E-03 | 4,77E-02 |

|                        |       |          |          |
|------------------------|-------|----------|----------|
| <i>SOX12</i>           | -1,20 | 4,53E-03 | 4,77E-02 |
| <i>LRRRC8A</i>         | 1,13  | 4,53E-03 | 4,77E-02 |
| <i>MGC5242</i>         | -1,16 | 4,54E-03 | 4,78E-02 |
| <i>TLE2</i>            | -1,41 | 4,54E-03 | 4,78E-02 |
| <i>SYAP1</i>           | 1,16  | 4,54E-03 | 4,78E-02 |
| <i>A_24_P84719</i>     | 1,30  | 4,55E-03 | 4,79E-02 |
| <i>DNAPTP6</i>         | 1,15  | 4,55E-03 | 4,79E-02 |
| <i>A_32_P168727</i>    | 1,23  | 4,55E-03 | 4,79E-02 |
| <i>BE168511</i>        | -1,14 | 4,58E-03 | 4,81E-02 |
| <i>BRPF3</i>           | -1,11 | 4,58E-03 | 4,81E-02 |
| <i>CASP2</i>           | -1,09 | 4,58E-03 | 4,81E-02 |
| <i>ENST00000335078</i> | 1,25  | 4,58E-03 | 4,81E-02 |
| <i>ENST00000374224</i> | -1,17 | 4,58E-03 | 4,81E-02 |
| <i>SORT1</i>           | 1,27  | 4,60E-03 | 4,83E-02 |
| <i>CAST1</i>           | 1,17  | 4,61E-03 | 4,83E-02 |
| <i>AA889382</i>        | -1,17 | 4,61E-03 | 4,84E-02 |
| <i>BM914371</i>        | 1,11  | 4,61E-03 | 4,84E-02 |
| <i>G36631</i>          | -1,13 | 4,62E-03 | 4,84E-02 |
| <i>A_24_P256050</i>    | 1,18  | 4,62E-03 | 4,84E-02 |
| <i>ZNF554</i>          | -1,17 | 4,62E-03 | 4,84E-02 |
| <i>A_32_P71212</i>     | -1,37 | 4,63E-03 | 4,85E-02 |
| <i>SLC13A5</i>         | -1,17 | 4,64E-03 | 4,85E-02 |
| <i>A_24_P697345</i>    | -1,14 | 4,63E-03 | 4,85E-02 |
| <i>MTL5</i>            | -1,12 | 4,63E-03 | 4,85E-02 |
| <i>AY562498</i>        | 1,12  | 4,63E-03 | 4,85E-02 |
| <i>A_24_P264685</i>    | 1,17  | 4,64E-03 | 4,85E-02 |
| <i>Y11328</i>          | -2,33 | 4,65E-03 | 4,86E-02 |
| <i>BF949582</i>        | -1,22 | 4,65E-03 | 4,86E-02 |
| <i>HSP90AB3P</i>       | 1,18  | 4,65E-03 | 4,86E-02 |
| <i>THC2319177</i>      | -1,40 | 4,66E-03 | 4,86E-02 |
| <i>A_32_P204126</i>    | -1,18 | 4,67E-03 | 4,86E-02 |
| <i>C18orf15</i>        | 1,13  | 4,66E-03 | 4,86E-02 |
| <i>NUFIP2</i>          | 1,15  | 4,67E-03 | 4,86E-02 |
| <i>MRPL33</i>          | 1,11  | 4,67E-03 | 4,87E-02 |
| <i>GNB3</i>            | -1,19 | 4,68E-03 | 4,88E-02 |
| <i>ACSL1</i>           | -1,16 | 4,69E-03 | 4,89E-02 |
| <i>GEM</i>             | 1,49  | 4,69E-03 | 4,89E-02 |
| <i>AB058742</i>        | -1,19 | 4,70E-03 | 4,89E-02 |
| <i>NT5C</i>            | -1,09 | 4,70E-03 | 4,89E-02 |
| <i>SEPX1</i>           | 1,22  | 4,70E-03 | 4,89E-02 |
| <i>CXorf10</i>         | -1,18 | 4,71E-03 | 4,89E-02 |
| <i>CHIA</i>            | 1,13  | 4,71E-03 | 4,89E-02 |
| <i>DKFZP686A01247</i>  | 1,25  | 4,71E-03 | 4,89E-02 |
| <i>AV736006</i>        | -1,19 | 4,72E-03 | 4,90E-02 |

|                        |       |          |          |
|------------------------|-------|----------|----------|
| <i>DEF6</i>            | -1,16 | 4,72E-03 | 4,90E-02 |
| <i>NOS1</i>            | 1,07  | 4,72E-03 | 4,90E-02 |
| <i>C14orf49</i>        | 1,14  | 4,72E-03 | 4,90E-02 |
| <i>AF130107</i>        | 1,20  | 4,72E-03 | 4,90E-02 |
| <i>HES1</i>            | 1,33  | 4,73E-03 | 4,90E-02 |
| <i>IL1RAP</i>          | 1,16  | 4,73E-03 | 4,90E-02 |
| <i>LCOR</i>            | -1,13 | 4,74E-03 | 4,91E-02 |
| <i>PDAP1</i>           | 1,08  | 4,75E-03 | 4,92E-02 |
| <i>FLJ20105</i>        | 1,10  | 4,76E-03 | 4,93E-02 |
| <i>MALL</i>            | 1,39  | 4,76E-03 | 4,93E-02 |
| <i>A_24_P213336</i>    | -1,12 | 4,77E-03 | 4,93E-02 |
| <i>ASCC3</i>           | 1,13  | 4,77E-03 | 4,93E-02 |
| <i>ENST00000342345</i> | 1,10  | 4,78E-03 | 4,94E-02 |
| <i>RAD17</i>           | -1,13 | 4,78E-03 | 4,94E-02 |
| <i>AF187554</i>        | 1,16  | 4,78E-03 | 4,94E-02 |
| <i>BF812215</i>        | -1,21 | 4,78E-03 | 4,94E-02 |
| <i>THC2269657</i>      | 1,20  | 4,78E-03 | 4,94E-02 |
| <i>TTC30B</i>          | -1,16 | 4,79E-03 | 4,94E-02 |
| <i>CV339166</i>        | -1,14 | 4,79E-03 | 4,94E-02 |
| <i>THC2437034</i>      | -1,18 | 4,79E-03 | 4,95E-02 |
| <i>TMEM9</i>           | -1,09 | 4,80E-03 | 4,95E-02 |
| <i>ENST00000294649</i> | -1,11 | 4,80E-03 | 4,95E-02 |
| <i>ZNF499</i>          | -1,13 | 4,81E-03 | 4,96E-02 |
| <i>RNF182</i>          | 1,26  | 4,81E-03 | 4,96E-02 |
| <i>LIPC</i>            | 1,33  | 4,81E-03 | 4,96E-02 |
| <i>RNF111</i>          | -1,18 | 4,82E-03 | 4,96E-02 |
| <i>RXRA</i>            | -1,11 | 4,82E-03 | 4,96E-02 |
| <i>A_24_P739075</i>    | 1,14  | 4,83E-03 | 4,97E-02 |
| <i>AK091801</i>        | -1,17 | 4,83E-03 | 4,97E-02 |
| <i>PYGL</i>            | -1,20 | 4,84E-03 | 4,98E-02 |
| <i>FAM29A</i>          | -1,10 | 4,84E-03 | 4,98E-02 |
| <i>AK093548</i>        | 1,11  | 4,84E-03 | 4,98E-02 |
| <i>THC2380898</i>      | -1,16 | 4,84E-03 | 4,98E-02 |
| <i>CR600638</i>        | 1,22  | 4,85E-03 | 4,98E-02 |
| <i>BC017851</i>        | -1,13 | 4,86E-03 | 4,99E-02 |
| <i>AI161396</i>        | 1,15  | 4,86E-03 | 4,99E-02 |
| <i>OBSL1</i>           | -1,11 | 4,86E-03 | 4,99E-02 |
| <i>BC017972</i>        | 1,16  | 4,86E-03 | 4,99E-02 |
| <i>MGC39518</i>        | -1,13 | 4,86E-03 | 4,99E-02 |
| <i>DDX55</i>           | -1,12 | 4,88E-03 | 5,00E-02 |
| <i>ENST00000272035</i> | -1,24 | 4,89E-03 | 5,01E-02 |
| <i>RIPK4</i>           | 1,42  | 4,89E-03 | 5,01E-02 |
| <i>SLC7A6OS</i>        | -1,10 | 4,90E-03 | 5,02E-02 |
| <i>CGI-09</i>          | 1,10  | 4,91E-03 | 5,02E-02 |

|                        |       |          |          |
|------------------------|-------|----------|----------|
| <i>THC2385873</i>      | -1,58 | 4,92E-03 | 5,03E-02 |
| <i>FAM20A</i>          | -1,34 | 4,92E-03 | 5,03E-02 |
| <i>GABARAPL3</i>       | 1,21  | 4,92E-03 | 5,03E-02 |
| <i>LOC55565</i>        | -1,13 | 4,92E-03 | 5,03E-02 |
| <i>SLC25A36</i>        | -1,11 | 4,93E-03 | 5,03E-02 |
| <i>HRH1</i>            | 1,25  | 4,93E-03 | 5,03E-02 |
| <i>ICAM2</i>           | 1,29  | 4,93E-03 | 5,04E-02 |
| <i>PABPC5</i>          | -1,17 | 4,95E-03 | 5,04E-02 |
| <i>THC2366133</i>      | -1,16 | 4,94E-03 | 5,04E-02 |
| <i>CCDC16</i>          | -1,16 | 4,94E-03 | 5,04E-02 |
| <i>THC2382784</i>      | -1,15 | 4,95E-03 | 5,04E-02 |
| <i>ROS1</i>            | -1,10 | 4,95E-03 | 5,04E-02 |
| <i>GATM</i>            | 1,18  | 4,95E-03 | 5,04E-02 |
| <i>ZMYM2</i>           | -1,16 | 4,95E-03 | 5,04E-02 |
| <i>TTC30A</i>          | -1,14 | 4,95E-03 | 5,04E-02 |
| <i>ENST00000295549</i> | 1,30  | 4,95E-03 | 5,04E-02 |
| <i>BC098428</i>        | -1,17 | 4,96E-03 | 5,04E-02 |
| <i>TBC1D14</i>         | -1,11 | 4,96E-03 | 5,04E-02 |
| <i>LOC344967</i>       | 1,11  | 4,96E-03 | 5,04E-02 |
| <i>C9orf68</i>         | 1,16  | 4,96E-03 | 5,04E-02 |
| <i>BU607658</i>        | -1,21 | 4,97E-03 | 5,05E-02 |
| <i>FGD5</i>            | 1,20  | 4,97E-03 | 5,05E-02 |
| <i>THC2283518</i>      | 1,22  | 4,97E-03 | 5,05E-02 |
| <i>AK094603</i>        | 1,35  | 4,97E-03 | 5,05E-02 |
| <i>PRKCBP1</i>         | -1,11 | 4,98E-03 | 5,06E-02 |
| <i>CR609843</i>        | -1,19 | 4,99E-03 | 5,07E-02 |
| <i>FLJ40712</i>        | -1,11 | 4,99E-03 | 5,07E-02 |
| <i>ZNF337</i>          | -1,15 | 5,00E-03 | 5,08E-02 |
| <i>ENST00000367233</i> | 1,13  | 5,02E-03 | 5,09E-02 |
| <i>XPO1</i>            | -1,14 | 5,03E-03 | 5,10E-02 |
| <i>KLHL15</i>          | 1,20  | 5,04E-03 | 5,10E-02 |
| <i>SMURF1</i>          | 1,15  | 5,04E-03 | 5,10E-02 |
| <i>THC2437430</i>      | 1,20  | 5,04E-03 | 5,10E-02 |
| <i>C11orf40</i>        | 1,11  | 5,05E-03 | 5,11E-02 |
| <i>TBP</i>             | -1,10 | 5,06E-03 | 5,12E-02 |
| <i>A_24_P599225</i>    | 1,12  | 5,06E-03 | 5,12E-02 |
| <i>THC2282719</i>      | -1,26 | 5,06E-03 | 5,12E-02 |
| <i>DDX26B</i>          | -1,16 | 5,06E-03 | 5,12E-02 |
| <i>ZFHX1B</i>          | 1,26  | 5,07E-03 | 5,13E-02 |
| <i>ENST00000238571</i> | -1,11 | 5,07E-03 | 5,13E-02 |
| <i>ENST00000379884</i> | -1,42 | 5,08E-03 | 5,13E-02 |
| <i>TRIT1</i>           | -1,16 | 5,08E-03 | 5,13E-02 |
| <i>ENST00000219746</i> | 1,16  | 5,09E-03 | 5,14E-02 |
| <i>THC2361599</i>      | -1,17 | 5,10E-03 | 5,15E-02 |

|                 |       |          |          |
|-----------------|-------|----------|----------|
| AK024900        | -1,16 | 5,12E-03 | 5,16E-02 |
| ENST00000219169 | 1,15  | 5,12E-03 | 5,17E-02 |
| RSPO3           | -1,90 | 5,13E-03 | 5,17E-02 |
| THC2372128      | -1,13 | 5,13E-03 | 5,17E-02 |
| GPR112          | -1,48 | 5,15E-03 | 5,18E-02 |
| THC2440119      | -1,21 | 5,15E-03 | 5,18E-02 |
| A_32_P145159    | -1,18 | 5,15E-03 | 5,18E-02 |
| PKD1L2          | -1,16 | 5,15E-03 | 5,18E-02 |
| PIK3R2          | -1,12 | 5,15E-03 | 5,18E-02 |
| ATE1            | 1,18  | 5,15E-03 | 5,18E-02 |
| FJX1            | 1,31  | 5,16E-03 | 5,19E-02 |
| A_24_P486659    | 1,16  | 5,16E-03 | 5,19E-02 |
| THC2317111      | -1,16 | 5,17E-03 | 5,20E-02 |
| THC2268956      | 1,24  | 5,19E-03 | 5,22E-02 |
| AK097139        | -1,18 | 5,20E-03 | 5,22E-02 |
| OR6K2           | 1,12  | 5,21E-03 | 5,23E-02 |
| M34432          | 1,11  | 5,21E-03 | 5,23E-02 |
| LIN7C           | 1,13  | 5,21E-03 | 5,23E-02 |
| CYP51A1         | 1,22  | 5,21E-03 | 5,23E-02 |
| BC071732        | 1,19  | 5,22E-03 | 5,23E-02 |
| AK095738        | -1,17 | 5,22E-03 | 5,24E-02 |
| TEP1            | 1,11  | 5,23E-03 | 5,24E-02 |
| THC2313300      | -1,17 | 5,23E-03 | 5,24E-02 |
| CLPX            | -1,09 | 5,23E-03 | 5,24E-02 |
| MRO             | 1,15  | 5,24E-03 | 5,25E-02 |
| LOC286382       | 1,10  | 5,25E-03 | 5,25E-02 |
| BC065757        | 1,10  | 5,25E-03 | 5,25E-02 |
| AF070565        | 1,10  | 5,25E-03 | 5,25E-02 |
| MAML1           | -1,11 | 5,25E-03 | 5,25E-02 |
| BIN3            | 1,12  | 5,26E-03 | 5,26E-02 |
| THC2453189      | -1,16 | 5,27E-03 | 5,26E-02 |
| ENST00000372146 | -1,15 | 5,29E-03 | 5,28E-02 |
| LOC91664        | -1,13 | 5,29E-03 | 5,28E-02 |
| KIF9            | 1,13  | 5,30E-03 | 5,29E-02 |
| ABHD9           | 1,26  | 5,30E-03 | 5,29E-02 |
| TMPRSS6         | 1,08  | 5,31E-03 | 5,30E-02 |
| BX332393        | -1,16 | 5,32E-03 | 5,30E-02 |
| THC2372800      | 1,11  | 5,32E-03 | 5,30E-02 |
| SAMHD1          | 1,17  | 5,32E-03 | 5,31E-02 |
| IGLL1           | -2,12 | 5,33E-03 | 5,31E-02 |
| AK098511        | -1,19 | 5,33E-03 | 5,31E-02 |
| TTBK2           | 1,13  | 5,33E-03 | 5,31E-02 |
| TMEFF2          | 1,19  | 5,34E-03 | 5,31E-02 |
| CR600305        | 1,16  | 5,34E-03 | 5,32E-02 |



|                        |       |          |          |
|------------------------|-------|----------|----------|
| <i>FLJ30934</i>        | -1,11 | 5,35E-03 | 5,32E-02 |
| <i>AT_ssH_RR_5</i>     | 1,14  | 5,35E-03 | 5,32E-02 |
| <i>HYLS1</i>           | -1,18 | 5,35E-03 | 5,32E-02 |
| <i>HEATR1</i>          | -1,09 | 5,35E-03 | 5,32E-02 |
| <i>THC2303043</i>      | -1,12 | 5,36E-03 | 5,32E-02 |
| <i>A_23_P206741</i>    | 1,33  | 5,37E-03 | 5,33E-02 |
| <i>THC2336837</i>      | 1,18  | 5,37E-03 | 5,33E-02 |
| <i>ZBTB39</i>          | -1,13 | 5,37E-03 | 5,33E-02 |
| <i>MAEA</i>            | -1,13 | 5,37E-03 | 5,33E-02 |
| <i>A_32_P219704</i>    | -1,27 | 5,38E-03 | 5,33E-02 |
| <i>TSPAN17</i>         | 1,11  | 5,38E-03 | 5,33E-02 |
| <i>BC031342</i>        | 1,19  | 5,38E-03 | 5,33E-02 |
| <i>AF271776</i>        | 1,24  | 5,38E-03 | 5,33E-02 |
| <i>CDK3</i>            | 1,12  | 5,39E-03 | 5,34E-02 |
| <i>ZNF518</i>          | -1,11 | 5,40E-03 | 5,34E-02 |
| <i>THC2273623</i>      | 1,18  | 5,40E-03 | 5,34E-02 |
| <i>BF803942</i>        | -1,40 | 5,41E-03 | 5,35E-02 |
| <i>SPAG8</i>           | -1,29 | 5,41E-03 | 5,35E-02 |
| <i>NP1167346</i>       | -1,14 | 5,41E-03 | 5,35E-02 |
| <i>A_24_P911612</i>    | -1,11 | 5,41E-03 | 5,35E-02 |
| <i>FAM47C</i>          | 1,11  | 5,41E-03 | 5,35E-02 |
| <i>PLXNA4A</i>         | 1,15  | 5,41E-03 | 5,35E-02 |
| <i>PRKAA2</i>          | 1,19  | 5,42E-03 | 5,35E-02 |
| <i>MGAT4A</i>          | 1,23  | 5,43E-03 | 5,36E-02 |
| <i>CNKSR3</i>          | 1,25  | 5,43E-03 | 5,36E-02 |
| <i>BF765768</i>        | -1,13 | 5,44E-03 | 5,37E-02 |
| <i>ZBTB24</i>          | -1,13 | 5,45E-03 | 5,38E-02 |
| <i>A_24_P910080</i>    | -1,30 | 5,46E-03 | 5,38E-02 |
| <i>ENST00000382416</i> | 1,20  | 5,46E-03 | 5,39E-02 |
| <i>THC2319687</i>      | 1,14  | 5,47E-03 | 5,40E-02 |
| <i>A_32_P206391</i>    | -1,16 | 5,48E-03 | 5,40E-02 |
| <i>MGC12760</i>        | -1,27 | 5,49E-03 | 5,41E-02 |
| <i>A_24_P929279</i>    | -1,12 | 5,49E-03 | 5,41E-02 |
| <i>C9orf52</i>         | 1,14  | 5,49E-03 | 5,41E-02 |
| <i>PANX1</i>           | 1,20  | 5,50E-03 | 5,41E-02 |
| <i>GAS2L3</i>          | 1,19  | 5,50E-03 | 5,41E-02 |
| <i>BX537651</i>        | 1,23  | 5,52E-03 | 5,43E-02 |
| <i>PRKCZ</i>           | 1,28  | 5,53E-03 | 5,43E-02 |
| <i>A_32_P153604</i>    | 1,17  | 5,53E-03 | 5,44E-02 |
| <i>DENND1C</i>         | -1,17 | 5,54E-03 | 5,44E-02 |
| <i>NFKBIZ</i>          | 1,81  | 5,54E-03 | 5,44E-02 |
| <i>FAM53B</i>          | -1,12 | 5,55E-03 | 5,45E-02 |
| <i>RORB</i>            | 1,46  | 5,55E-03 | 5,45E-02 |
| <i>OMA1</i>            | -1,10 | 5,55E-03 | 5,45E-02 |

|                        |       |          |          |
|------------------------|-------|----------|----------|
| <i>RAD23A</i>          | 1,11  | 5,56E-03 | 5,45E-02 |
| <i>FPGT</i>            | -1,18 | 5,57E-03 | 5,46E-02 |
| <i>THC2278737</i>      | -1,37 | 5,58E-03 | 5,46E-02 |
| <i>FLJ14712</i>        | -1,21 | 5,58E-03 | 5,46E-02 |
| <i>C10orf83</i>        | -1,13 | 5,59E-03 | 5,48E-02 |
| <i>TMOD2</i>           | 1,18  | 5,59E-03 | 5,48E-02 |
| <i>ENST00000219090</i> | -1,18 | 5,60E-03 | 5,48E-02 |
| <i>FLJ12986</i>        | -1,12 | 5,60E-03 | 5,48E-02 |
| <i>GNB1L</i>           | -1,12 | 5,60E-03 | 5,48E-02 |
| <i>ATR</i>             | -1,10 | 5,61E-03 | 5,48E-02 |
| <i>A_23_P99731</i>     | 1,15  | 5,61E-03 | 5,49E-02 |
| <i>FAM72A</i>          | 1,20  | 5,61E-03 | 5,49E-02 |
| <i>AVP11</i>           | 1,28  | 5,62E-03 | 5,49E-02 |
| <i>ENST00000340940</i> | 1,18  | 5,62E-03 | 5,49E-02 |
| <i>BECN1</i>           | 1,08  | 5,62E-03 | 5,49E-02 |
| <i>PSMC3</i>           | 1,09  | 5,63E-03 | 5,49E-02 |
| <i>LOC440353</i>       | -1,13 | 5,64E-03 | 5,50E-02 |
| <i>PTPN13</i>          | -1,14 | 5,64E-03 | 5,51E-02 |
| <i>LOC389895</i>       | -1,13 | 5,65E-03 | 5,51E-02 |
| <i>ROCK1</i>           | 1,12  | 5,65E-03 | 5,51E-02 |
| <i>COX15</i>           | -1,11 | 5,65E-03 | 5,51E-02 |
| <i>A_32_P143824</i>    | 1,15  | 5,66E-03 | 5,51E-02 |
| <i>ARSE</i>            | 1,27  | 5,66E-03 | 5,52E-02 |
| <i>ITGB7</i>           | -1,21 | 5,67E-03 | 5,52E-02 |
| <i>LOC401431</i>       | -1,14 | 5,67E-03 | 5,52E-02 |
| <i>MCCC2</i>           | 1,09  | 5,67E-03 | 5,52E-02 |
| <i>LOC402573</i>       | 1,15  | 5,67E-03 | 5,52E-02 |
| <i>C7orf10</i>         | 1,19  | 5,67E-03 | 5,52E-02 |
| <i>ENST00000379557</i> | -1,25 | 5,68E-03 | 5,52E-02 |
| <i>AK129895</i>        | -1,13 | 5,69E-03 | 5,53E-02 |
| <i>PIWIL4</i>          | -1,16 | 5,71E-03 | 5,54E-02 |
| <i>RASSF4</i>          | 1,15  | 5,71E-03 | 5,54E-02 |
| <i>LDHA</i>            | 1,19  | 5,71E-03 | 5,54E-02 |
| <i>GATA2</i>           | -1,18 | 5,71E-03 | 5,54E-02 |
| <i>KCTD8</i>           | -1,24 | 5,72E-03 | 5,55E-02 |
| <i>C3orf52</i>         | 1,27  | 5,72E-03 | 5,55E-02 |
| <i>CXorf45</i>         | -1,15 | 5,72E-03 | 5,55E-02 |
| <i>PIM1</i>            | 1,61  | 5,73E-03 | 5,56E-02 |
| <i>C1orf192</i>        | 1,10  | 5,74E-03 | 5,56E-02 |
| <i>KIAA1539</i>        | 1,10  | 5,74E-03 | 5,56E-02 |
| <i>UQCRB</i>           | 1,12  | 5,74E-03 | 5,56E-02 |
| <i>ARHGAP4</i>         | -1,19 | 5,75E-03 | 5,57E-02 |
| <i>ENST00000186436</i> | -1,14 | 5,75E-03 | 5,57E-02 |
| <i>SAT</i>             | 1,32  | 5,76E-03 | 5,57E-02 |

|                        |       |          |          |
|------------------------|-------|----------|----------|
| <i>PLD1</i>            | 1,25  | 5,76E-03 | 5,57E-02 |
| <i>LPHN3</i>           | 1,31  | 5,76E-03 | 5,57E-02 |
| <i>SIPA1L2</i>         | 1,26  | 5,78E-03 | 5,59E-02 |
| <i>TGM2</i>            | -1,29 | 5,79E-03 | 5,59E-02 |
| <i>DPH1</i>            | 1,08  | 5,79E-03 | 5,59E-02 |
| <i>C6orf192</i>        | -1,15 | 5,80E-03 | 5,60E-02 |
| <i>SEMA6B</i>          | 1,17  | 5,80E-03 | 5,60E-02 |
| <i>AK129743</i>        | -1,28 | 5,80E-03 | 5,60E-02 |
| <i>GTF2B</i>           | 1,17  | 5,81E-03 | 5,60E-02 |
| <i>PTTG3</i>           | 1,17  | 5,80E-03 | 5,60E-02 |
| <i>FLJ32310</i>        | 1,18  | 5,81E-03 | 5,60E-02 |
| <i>FOXP1</i>           | 1,20  | 5,81E-03 | 5,60E-02 |
| <i>ENST00000328419</i> | -1,28 | 5,81E-03 | 5,60E-02 |
| <i>HIST1H2AC</i>       | 1,14  | 5,81E-03 | 5,60E-02 |
| <i>ZNF684</i>          | -1,16 | 5,82E-03 | 5,61E-02 |
| <i>AL133577</i>        | -1,20 | 5,82E-03 | 5,61E-02 |
| <i>HOXB2</i>           | -1,21 | 5,83E-03 | 5,61E-02 |
| <i>C15orf21</i>        | -1,10 | 5,83E-03 | 5,61E-02 |
| <i>AW268902</i>        | -1,21 | 5,86E-03 | 5,63E-02 |
| <i>TMEM39A</i>         | -1,16 | 5,87E-03 | 5,65E-02 |
| <i>XCR1</i>            | 1,12  | 5,89E-03 | 5,66E-02 |
| <i>A_24_P221601</i>    | 1,17  | 5,89E-03 | 5,66E-02 |
| <i>LCK</i>             | -1,29 | 5,90E-03 | 5,66E-02 |
| <i>AK026209</i>        | -1,13 | 5,90E-03 | 5,66E-02 |
| <i>DB381305</i>        | 1,24  | 5,90E-03 | 5,66E-02 |
| <i>FMR1</i>            | 1,09  | 5,90E-03 | 5,67E-02 |
| <i>DUSP15</i>          | 1,11  | 5,91E-03 | 5,67E-02 |
| <i>LOC155060</i>       | -1,16 | 5,91E-03 | 5,67E-02 |
| <i>ENST00000377502</i> | 1,09  | 5,91E-03 | 5,67E-02 |
| <i>C20orf55</i>        | -1,14 | 5,93E-03 | 5,69E-02 |
| <i>CDO1</i>            | -1,23 | 5,94E-03 | 5,69E-02 |
| <i>BE394309</i>        | -1,18 | 5,94E-03 | 5,69E-02 |
| <i>SCAND2</i>          | -1,13 | 5,94E-03 | 5,69E-02 |
| <i>A_23_P407750</i>    | 1,12  | 5,94E-03 | 5,69E-02 |
| <i>EXT1</i>            | 1,17  | 5,94E-03 | 5,69E-02 |
| <i>ENST00000342275</i> | 1,15  | 5,95E-03 | 5,69E-02 |
| <i>LPPR4</i>           | 1,33  | 5,95E-03 | 5,69E-02 |
| <i>CR601567</i>        | -1,16 | 5,95E-03 | 5,69E-02 |
| <i>GYPE</i>            | -1,09 | 5,95E-03 | 5,69E-02 |
| <i>ASB3</i>            | -1,11 | 5,96E-03 | 5,69E-02 |
| <i>KIAA0690</i>        | 1,25  | 5,96E-03 | 5,70E-02 |
| <i>ZNF224</i>          | -1,13 | 5,97E-03 | 5,70E-02 |
| <i>ALDH1A1</i>         | -1,23 | 5,98E-03 | 5,71E-02 |
| <i>NDUFS1</i>          | 1,10  | 6,00E-03 | 5,73E-02 |

|                     |       |          |          |
|---------------------|-------|----------|----------|
| <i>AI887037</i>     | 1,11  | 6,00E-03 | 5,73E-02 |
| <i>TITF1</i>        | -1,14 | 6,00E-03 | 5,73E-02 |
| <i>SERPINF1</i>     | -1,31 | 6,01E-03 | 5,73E-02 |
| <i>A_32_P3221</i>   | -1,14 | 6,02E-03 | 5,74E-02 |
| <i>MDFIC</i>        | -1,22 | 6,02E-03 | 5,74E-02 |
| <i>LOC51315</i>     | -1,18 | 6,03E-03 | 5,74E-02 |
| <i>BRWD2</i>        | -1,14 | 6,03E-03 | 5,74E-02 |
| <i>DLEU2</i>        | 1,16  | 6,03E-03 | 5,74E-02 |
| <i>SIRT3</i>        | -1,11 | 6,04E-03 | 5,75E-02 |
| <i>C17orf80</i>     | -1,14 | 6,04E-03 | 5,75E-02 |
| <i>LOC649125</i>    | 1,11  | 6,04E-03 | 5,75E-02 |
| <i>ZNF585A</i>      | -1,14 | 6,05E-03 | 5,75E-02 |
| <i>SERTAD2</i>      | 1,13  | 6,05E-03 | 5,75E-02 |
| <i>BE924986</i>     | 1,34  | 6,05E-03 | 5,75E-02 |
| <i>TTC31</i>        | -1,08 | 6,07E-03 | 5,76E-02 |
| <i>CTRC</i>         | 1,11  | 6,07E-03 | 5,76E-02 |
| <i>OGFOD2</i>       | -1,11 | 6,08E-03 | 5,77E-02 |
| <i>NFKBIA</i>       | 1,50  | 6,08E-03 | 5,77E-02 |
| <i>A_24_P136155</i> | -1,25 | 6,08E-03 | 5,77E-02 |
| <i>TTLL3</i>        | -1,12 | 6,08E-03 | 5,77E-02 |
| <i>THC2443552</i>   | -1,17 | 6,09E-03 | 5,77E-02 |
| <i>SETDB2</i>       | -1,11 | 6,09E-03 | 5,77E-02 |
| <i>KIAA0773</i>     | -1,11 | 6,09E-03 | 5,77E-02 |
| <i>THC2308403</i>   | 1,25  | 6,10E-03 | 5,78E-02 |
| <i>U92992</i>       | -1,15 | 6,11E-03 | 5,78E-02 |
| <i>CRLF2</i>        | 1,12  | 6,11E-03 | 5,78E-02 |
| <i>GSPT1</i>        | 1,13  | 6,11E-03 | 5,78E-02 |
| <i>WNT10B</i>       | 1,21  | 6,11E-03 | 5,78E-02 |
| <i>PKD2L2</i>       | -1,12 | 6,12E-03 | 5,79E-02 |
| <i>RAB7</i>         | 1,19  | 6,12E-03 | 5,79E-02 |
| <i>A_32_P177843</i> | -1,21 | 6,13E-03 | 5,80E-02 |
| <i>SYNCRIP</i>      | 1,09  | 6,14E-03 | 5,80E-02 |
| <i>BI261159</i>     | -1,13 | 6,14E-03 | 5,81E-02 |
| <i>FBXL7</i>        | -1,13 | 6,15E-03 | 5,81E-02 |
| <i>FLRT1</i>        | -1,20 | 6,16E-03 | 5,81E-02 |
| <i>A_32_P85880</i>  | -1,18 | 6,16E-03 | 5,81E-02 |
| <i>BE272930</i>     | 1,14  | 6,16E-03 | 5,81E-02 |
| <i>LOC441220</i>    | 1,19  | 6,16E-03 | 5,81E-02 |
| <i>AF402619</i>     | 1,14  | 6,17E-03 | 5,82E-02 |
| <i>BCL6B</i>        | 1,24  | 6,17E-03 | 5,82E-02 |
| <i>ETF1</i>         | 1,13  | 6,17E-03 | 5,82E-02 |
| <i>PLEKHA5</i>      | -1,18 | 6,18E-03 | 5,82E-02 |
| <i>EPS15L1</i>      | -1,09 | 6,18E-03 | 5,83E-02 |
| <i>HMG2</i>         | -1,09 | 6,19E-03 | 5,83E-02 |

|                        |       |          |          |
|------------------------|-------|----------|----------|
| <i>SLC45A3</i>         | -1,24 | 6,20E-03 | 5,84E-02 |
| <i>GSTM2</i>           | -1,16 | 6,21E-03 | 5,84E-02 |
| <i>RANGAP1</i>         | 1,12  | 6,20E-03 | 5,84E-02 |
| <i>ZDHHC20</i>         | 1,10  | 6,21E-03 | 5,84E-02 |
| <i>SMAD1</i>           | -1,17 | 6,21E-03 | 5,84E-02 |
| <i>ZNF696</i>          | -1,17 | 6,21E-03 | 5,84E-02 |
| <i>PTPRF</i>           | -1,29 | 6,22E-03 | 5,85E-02 |
| <i>AK090477</i>        | 1,25  | 6,22E-03 | 5,85E-02 |
| <i>NRTN</i>            | 1,25  | 6,22E-03 | 5,85E-02 |
| <i>GPBAR1</i>          | -1,15 | 6,23E-03 | 5,85E-02 |
| <i>ZNF614</i>          | 1,10  | 6,24E-03 | 5,86E-02 |
| <i>CR591264</i>        | -1,12 | 6,25E-03 | 5,87E-02 |
| <i>AL833366</i>        | -1,11 | 6,25E-03 | 5,87E-02 |
| <i>AY927488</i>        | -1,33 | 6,26E-03 | 5,87E-02 |
| <i>LOC285749</i>       | -1,18 | 6,26E-03 | 5,87E-02 |
| <i>COL4A3</i>          | -1,31 | 6,27E-03 | 5,87E-02 |
| <i>AF445027</i>        | -1,15 | 6,27E-03 | 5,87E-02 |
| <i>COG2</i>            | -1,12 | 6,27E-03 | 5,87E-02 |
| <i>C12orf31</i>        | 1,09  | 6,27E-03 | 5,87E-02 |
| <i>ENST00000298762</i> | 1,15  | 6,27E-03 | 5,87E-02 |
| <i>A_24_P745342</i>    | 1,11  | 6,28E-03 | 5,87E-02 |
| <i>AK090485</i>        | -1,15 | 6,28E-03 | 5,88E-02 |
| <i>SMARCA1</i>         | -1,08 | 6,30E-03 | 5,89E-02 |
| <i>BX110903</i>        | 1,23  | 6,30E-03 | 5,89E-02 |
| <i>NCK1</i>            | -1,16 | 6,30E-03 | 5,89E-02 |
| <i>A_24_P298886</i>    | 1,16  | 6,31E-03 | 5,89E-02 |
| <i>CR589996</i>        | 1,17  | 6,32E-03 | 5,90E-02 |
| <i>THC2312274</i>      | -1,12 | 6,33E-03 | 5,91E-02 |
| <i>ASTE1</i>           | -1,17 | 6,34E-03 | 5,92E-02 |
| <i>DKFZP56400523</i>   | -1,13 | 6,35E-03 | 5,92E-02 |
| <i>MSRA</i>            | 1,11  | 6,35E-03 | 5,93E-02 |
| <i>THC2408221</i>      | 1,10  | 6,36E-03 | 5,93E-02 |
| <i>BF718373</i>        | 1,14  | 6,37E-03 | 5,94E-02 |
| <i>BF238843</i>        | -1,13 | 6,37E-03 | 5,94E-02 |
| <i>BC014218</i>        | -1,14 | 6,39E-03 | 5,96E-02 |
| <i>L06610</i>          | -1,24 | 6,40E-03 | 5,96E-02 |
| <i>THC2439682</i>      | -1,15 | 6,40E-03 | 5,96E-02 |
| <i>DNAH3</i>           | 1,08  | 6,41E-03 | 5,97E-02 |
| <i>ENST00000248668</i> | 1,27  | 6,42E-03 | 5,98E-02 |
| <i>NUDT13</i>          | -1,11 | 6,43E-03 | 5,98E-02 |
| <i>ARL15</i>           | 1,20  | 6,43E-03 | 5,98E-02 |
| <i>FAM74A4</i>         | 1,28  | 6,43E-03 | 5,98E-02 |
| <i>CACNA2D1</i>        | 1,30  | 6,45E-03 | 6,00E-02 |
| <i>AK025818</i>        | 1,12  | 6,46E-03 | 6,00E-02 |

|                        |       |          |          |
|------------------------|-------|----------|----------|
| <i>CROCC</i>           | 1,10  | 6,47E-03 | 6,01E-02 |
| <i>FNDC3B</i>          | 1,16  | 6,47E-03 | 6,01E-02 |
| <i>BX104490</i>        | 1,15  | 6,48E-03 | 6,01E-02 |
| <i>THC2406944</i>      | -1,27 | 6,48E-03 | 6,01E-02 |
| <i>FLJ31485</i>        | 1,26  | 6,48E-03 | 6,01E-02 |
| <i>AA814210</i>        | -1,15 | 6,48E-03 | 6,02E-02 |
| <i>EGFL7</i>           | -1,25 | 6,50E-03 | 6,02E-02 |
| <i>AK095719</i>        | -1,16 | 6,50E-03 | 6,02E-02 |
| <i>SSX2</i>            | 1,09  | 6,50E-03 | 6,02E-02 |
| <i>PTPN14</i>          | 1,24  | 6,50E-03 | 6,02E-02 |
| <i>KCTD16</i>          | 1,39  | 6,50E-03 | 6,02E-02 |
| <i>LOC147650</i>       | -1,19 | 6,50E-03 | 6,02E-02 |
| <i>PDRG1</i>           | -1,12 | 6,51E-03 | 6,02E-02 |
| <i>KIAA0350</i>        | -1,10 | 6,51E-03 | 6,02E-02 |
| <i>ZNF323</i>          | -1,26 | 6,51E-03 | 6,02E-02 |
| <i>AK074558</i>        | 1,12  | 6,52E-03 | 6,03E-02 |
| <i>THC2443990</i>      | 1,11  | 6,52E-03 | 6,03E-02 |
| <i>TMEM41A</i>         | -1,11 | 6,53E-03 | 6,03E-02 |
| <i>AKAP12</i>          | 1,39  | 6,52E-03 | 6,03E-02 |
| <i>THC2386124</i>      | -1,31 | 6,53E-03 | 6,03E-02 |
| <i>BC008631</i>        | -1,28 | 6,54E-03 | 6,04E-02 |
| <i>CR744556</i>        | -1,12 | 6,54E-03 | 6,04E-02 |
| <i>ENST00000377703</i> | -1,15 | 6,55E-03 | 6,04E-02 |
| <i>CD1D</i>            | -1,15 | 6,55E-03 | 6,04E-02 |
| <i>BC035156</i>        | -1,22 | 6,56E-03 | 6,05E-02 |
| <i>CLK1</i>            | -1,24 | 6,56E-03 | 6,05E-02 |
| <i>AGRP</i>            | 1,12  | 6,57E-03 | 6,06E-02 |
| <i>TMEM30B</i>         | 1,27  | 6,57E-03 | 6,06E-02 |
| <i>A_32_P1076</i>      | 1,13  | 6,58E-03 | 6,06E-02 |
| <i>ENST00000242475</i> | 1,20  | 6,58E-03 | 6,06E-02 |
| <i>GPM6B</i>           | 1,38  | 6,59E-03 | 6,07E-02 |
| <i>VGCNL1</i>          | 1,15  | 6,59E-03 | 6,07E-02 |
| <i>ZNF322B</i>         | -1,21 | 6,60E-03 | 6,07E-02 |
| <i>TMEM127</i>         | 1,09  | 6,60E-03 | 6,07E-02 |
| <i>TARP</i>            | -1,18 | 6,60E-03 | 6,07E-02 |
| <i>TRPC6</i>           | 1,23  | 6,61E-03 | 6,08E-02 |
| <i>ATP10A</i>          | 1,36  | 6,62E-03 | 6,08E-02 |
| <i>MGC26647</i>        | 1,10  | 6,63E-03 | 6,09E-02 |
| <i>AW467174</i>        | 1,23  | 6,63E-03 | 6,09E-02 |
| <i>THC2438889</i>      | -1,19 | 6,64E-03 | 6,09E-02 |
| <i>CK430712</i>        | -1,13 | 6,64E-03 | 6,10E-02 |
| <i>PIAS3</i>           | -1,11 | 6,64E-03 | 6,10E-02 |
| <i>MTAC2D1</i>         | -1,40 | 6,66E-03 | 6,10E-02 |
| <i>ELMO2</i>           | -1,16 | 6,66E-03 | 6,10E-02 |

|                        |       |          |          |
|------------------------|-------|----------|----------|
| <i>AW452819</i>        | 1,19  | 6,65E-03 | 6,10E-02 |
| <i>FAS</i>             | 1,21  | 6,65E-03 | 6,10E-02 |
| <i>XYLT1</i>           | 1,22  | 6,66E-03 | 6,10E-02 |
| <i>VEGF</i>            | 1,20  | 6,67E-03 | 6,11E-02 |
| <i>CTA-246H3.1</i>     | -2,15 | 6,68E-03 | 6,12E-02 |
| <i>GATAD1</i>          | -1,12 | 6,68E-03 | 6,12E-02 |
| <i>NUP62</i>           | -1,16 | 6,69E-03 | 6,13E-02 |
| <i>RDH5</i>            | 1,31  | 6,71E-03 | 6,14E-02 |
| <i>AK023354</i>        | -1,08 | 6,71E-03 | 6,14E-02 |
| <i>C4orf24</i>         | -1,21 | 6,72E-03 | 6,15E-02 |
| <i>THC2439252</i>      | -1,24 | 6,73E-03 | 6,15E-02 |
| <i>A_32_P149806</i>    | 1,10  | 6,73E-03 | 6,16E-02 |
| <i>ENST00000356987</i> | -1,27 | 6,74E-03 | 6,16E-02 |
| <i>UHG</i>             | -1,15 | 6,74E-03 | 6,16E-02 |
| <i>PLEKHH2</i>         | -1,19 | 6,77E-03 | 6,18E-02 |
| <i>BE074871</i>        | -1,09 | 6,77E-03 | 6,18E-02 |
| <i>INMT</i>            | 1,22  | 6,77E-03 | 6,18E-02 |
| <i>BF129169</i>        | -1,26 | 6,78E-03 | 6,19E-02 |
| <i>AK092668</i>        | 1,19  | 6,78E-03 | 6,19E-02 |
| <i>C7</i>              | -2,18 | 6,79E-03 | 6,19E-02 |
| <i>MMAA</i>            | 1,09  | 6,79E-03 | 6,19E-02 |
| <i>A_32_P124926</i>    | -1,11 | 6,79E-03 | 6,19E-02 |
| <i>TICAM1</i>          | 1,22  | 6,80E-03 | 6,19E-02 |
| <i>GNPDA1</i>          | -1,14 | 6,81E-03 | 6,21E-02 |
| <i>THC2379087</i>      | 1,14  | 6,81E-03 | 6,21E-02 |
| <i>C6orf203</i>        | -1,13 | 6,82E-03 | 6,21E-02 |
| <i>FREM1</i>           | -1,27 | 6,82E-03 | 6,21E-02 |
| <i>PLEKHA3</i>         | 1,09  | 6,82E-03 | 6,21E-02 |
| <i>THC2376384</i>      | -1,20 | 6,83E-03 | 6,21E-02 |
| <i>TBL2</i>            | -1,18 | 6,83E-03 | 6,21E-02 |
| <i>ZNF71</i>           | -1,14 | 6,83E-03 | 6,21E-02 |
| <i>THC2377375</i>      | -1,15 | 6,83E-03 | 6,21E-02 |
| <i>A_24_P686014</i>    | 1,22  | 6,83E-03 | 6,21E-02 |
| <i>CR616748</i>        | -1,10 | 6,84E-03 | 6,21E-02 |
| <i>KIAA1961</i>        | 1,14  | 6,84E-03 | 6,21E-02 |
| <i>KRTAP19-1</i>       | 1,09  | 6,85E-03 | 6,22E-02 |
| <i>THC2284849</i>      | 1,34  | 6,85E-03 | 6,22E-02 |
| <i>ENST00000265450</i> | 1,18  | 6,86E-03 | 6,22E-02 |
| <i>THC2375310</i>      | -1,31 | 6,86E-03 | 6,22E-02 |
| <i>FZD2</i>            | -1,18 | 6,87E-03 | 6,22E-02 |
| <i>C1orf131</i>        | -1,12 | 6,86E-03 | 6,22E-02 |
| <i>MAP4K4</i>          | 1,17  | 6,87E-03 | 6,22E-02 |
| <i>NOLC1</i>           | 1,18  | 6,86E-03 | 6,22E-02 |
| <i>THC2437069</i>      | -1,28 | 6,87E-03 | 6,22E-02 |

|                        |       |          |          |
|------------------------|-------|----------|----------|
| <i>METTL3</i>          | -1,13 | 6,87E-03 | 6,22E-02 |
| <i>NUDT16L1</i>        | -1,14 | 6,89E-03 | 6,23E-02 |
| <i>C14orf121</i>       | 1,09  | 6,89E-03 | 6,23E-02 |
| <i>THC2450500</i>      | -1,20 | 6,91E-03 | 6,25E-02 |
| <i>DKFZp547G183</i>    | -1,20 | 6,92E-03 | 6,26E-02 |
| <i>ZNF334</i>          | -1,16 | 6,93E-03 | 6,26E-02 |
| <i>ZNF710</i>          | -1,13 | 6,93E-03 | 6,27E-02 |
| <i>HIST1H2BK</i>       | -1,15 | 6,94E-03 | 6,27E-02 |
| <i>C20orf11</i>        | -1,13 | 6,94E-03 | 6,27E-02 |
| <i>BC033983</i>        | -1,13 | 6,95E-03 | 6,28E-02 |
| <i>BM703463</i>        | -1,18 | 6,97E-03 | 6,29E-02 |
| <i>TMEM98</i>          | -1,15 | 6,97E-03 | 6,29E-02 |
| <i>THC2351317</i>      | -1,20 | 6,98E-03 | 6,29E-02 |
| <i>ITGA2</i>           | 1,13  | 6,98E-03 | 6,29E-02 |
| <i>ANKRD9</i>          | 1,16  | 6,98E-03 | 6,29E-02 |
| <i>PCSK1</i>           | 1,16  | 6,98E-03 | 6,29E-02 |
| <i>DAAM2</i>           | 1,24  | 6,99E-03 | 6,30E-02 |
| <i>TSFM</i>            | -1,10 | 6,99E-03 | 6,30E-02 |
| <i>LOC653188</i>       | -1,30 | 7,00E-03 | 6,30E-02 |
| <i>B3GALNT1</i>        | -1,11 | 7,02E-03 | 6,32E-02 |
| <i>DLK1</i>            | -2,00 | 7,02E-03 | 6,32E-02 |
| <i>LOC389289</i>       | -1,21 | 7,03E-03 | 6,33E-02 |
| <i>APLN</i>            | 1,10  | 7,03E-03 | 6,33E-02 |
| <i>ZNF175</i>          | -1,16 | 7,04E-03 | 6,33E-02 |
| <i>MYO7A</i>           | -1,15 | 7,05E-03 | 6,34E-02 |
| <i>LOC201164</i>       | -1,28 | 7,06E-03 | 6,34E-02 |
| <i>MYO1E</i>           | 1,12  | 7,06E-03 | 6,35E-02 |
| <i>ENST00000296149</i> | -1,11 | 7,06E-03 | 6,35E-02 |
| <i>CR603951</i>        | -1,16 | 7,08E-03 | 6,36E-02 |
| <i>MATK</i>            | -1,17 | 7,09E-03 | 6,36E-02 |
| <i>AK021629</i>        | -1,09 | 7,08E-03 | 6,36E-02 |
| <i>AY358167</i>        | 1,27  | 7,08E-03 | 6,36E-02 |
| <i>SLC24A1</i>         | -1,17 | 7,09E-03 | 6,36E-02 |
| <i>KIF24</i>           | -1,19 | 7,09E-03 | 6,36E-02 |
| <i>A_24_P50509</i>     | 1,17  | 7,09E-03 | 6,36E-02 |
| <i>CXCR3</i>           | -1,35 | 7,13E-03 | 6,38E-02 |
| <i>NDST4</i>           | -1,29 | 7,13E-03 | 6,38E-02 |
| <i>BM723547</i>        | -1,20 | 7,13E-03 | 6,38E-02 |
| <i>TSPYL4</i>          | -1,14 | 7,12E-03 | 6,38E-02 |
| <i>USP52</i>           | -1,12 | 7,13E-03 | 6,38E-02 |
| <i>LRR1Q2</i>          | 1,14  | 7,12E-03 | 6,38E-02 |
| <i>AF086205</i>        | 1,17  | 7,12E-03 | 6,38E-02 |
| <i>ARL13B</i>          | 1,19  | 7,12E-03 | 6,38E-02 |
| <i>IL3RA</i>           | 1,21  | 7,13E-03 | 6,38E-02 |



|                        |       |          |          |
|------------------------|-------|----------|----------|
| <i>CDK4</i>            | -1,12 | 7,16E-03 | 6,40E-02 |
| <i>FAM62C</i>          | -1,27 | 7,17E-03 | 6,40E-02 |
| <i>LOC441258</i>       | -1,08 | 7,17E-03 | 6,40E-02 |
| <i>RBJ</i>             | 1,24  | 7,17E-03 | 6,41E-02 |
| <i>GPR143</i>          | -1,20 | 7,18E-03 | 6,41E-02 |
| <i>LOC285188</i>       | -1,18 | 7,19E-03 | 6,41E-02 |
| <i>THC2429167</i>      | -1,11 | 7,19E-03 | 6,41E-02 |
| <i>U85992</i>          | -1,74 | 7,20E-03 | 6,42E-02 |
| <i>HMG2L1</i>          | -1,12 | 7,20E-03 | 6,42E-02 |
| <i>THC2411757</i>      | 1,18  | 7,21E-03 | 6,43E-02 |
| <i>FLJ16542</i>        | -1,14 | 7,22E-03 | 6,43E-02 |
| <i>LIMS1</i>           | 1,16  | 7,22E-03 | 6,43E-02 |
| <i>WDR21A</i>          | -1,16 | 7,23E-03 | 6,44E-02 |
| <i>AK021570</i>        | -1,10 | 7,23E-03 | 6,44E-02 |
| <i>ZNF24</i>           | 1,09  | 7,23E-03 | 6,44E-02 |
| <i>ELK4</i>            | 1,19  | 7,24E-03 | 6,44E-02 |
| <i>THC2282787</i>      | -1,26 | 7,24E-03 | 6,44E-02 |
| <i>LOC442512</i>       | 1,13  | 7,25E-03 | 6,45E-02 |
| <i>LOC399744</i>       | -1,15 | 7,26E-03 | 6,45E-02 |
| <i>AL360201</i>        | -1,14 | 7,26E-03 | 6,45E-02 |
| <i>ZNF394</i>          | 1,11  | 7,26E-03 | 6,46E-02 |
| <i>SYT11</i>           | 1,18  | 7,27E-03 | 6,46E-02 |
| <i>MAGED4</i>          | -1,17 | 7,29E-03 | 6,47E-02 |
| <i>WDR59</i>           | -1,12 | 7,28E-03 | 6,47E-02 |
| <i>TBXAS1</i>          | 1,12  | 7,30E-03 | 6,48E-02 |
| <i>BQ333643</i>        | 1,11  | 7,30E-03 | 6,48E-02 |
| <i>TXK</i>             | -1,09 | 7,31E-03 | 6,49E-02 |
| <i>AB040974</i>        | -1,11 | 7,32E-03 | 6,50E-02 |
| <i>TRMT5</i>           | -1,09 | 7,33E-03 | 6,50E-02 |
| <i>CR622342</i>        | -1,20 | 7,35E-03 | 6,50E-02 |
| <i>BC043173</i>        | -1,20 | 7,35E-03 | 6,50E-02 |
| <i>BC033331</i>        | -1,20 | 7,34E-03 | 6,50E-02 |
| <i>DCUN1D4</i>         | -1,14 | 7,34E-03 | 6,50E-02 |
| <i>BC035740</i>        | 1,12  | 7,34E-03 | 6,50E-02 |
| <i>THRB</i>            | 1,17  | 7,34E-03 | 6,50E-02 |
| <i>THC2431967</i>      | 1,18  | 7,34E-03 | 6,50E-02 |
| <i>THC2315742</i>      | -1,14 | 7,35E-03 | 6,51E-02 |
| <i>THC2406017</i>      | -1,23 | 7,37E-03 | 6,51E-02 |
| <i>KIAA1609</i>        | -1,13 | 7,38E-03 | 6,52E-02 |
| <i>CAMSAP1</i>         | -1,11 | 7,38E-03 | 6,53E-02 |
| <i>A_23_P16496</i>     | 1,65  | 7,39E-03 | 6,53E-02 |
| <i>GFI1</i>            | -1,18 | 7,39E-03 | 6,53E-02 |
| <i>ENST00000369042</i> | -1,15 | 7,40E-03 | 6,53E-02 |
| <i>LOC253981</i>       | 1,14  | 7,39E-03 | 6,53E-02 |

|                        |       |          |          |
|------------------------|-------|----------|----------|
| <i>A_24_P654066</i>    | 1,23  | 7,39E-03 | 6,53E-02 |
| <i>MARK3</i>           | 1,07  | 7,40E-03 | 6,53E-02 |
| <i>SMPD4</i>           | -1,13 | 7,41E-03 | 6,54E-02 |
| <i>AB063923</i>        | -1,42 | 7,41E-03 | 6,54E-02 |
| <i>HP</i>              | -1,22 | 7,42E-03 | 6,54E-02 |
| <i>USP2</i>            | 1,10  | 7,42E-03 | 6,54E-02 |
| <i>CD160</i>           | -1,14 | 7,43E-03 | 6,54E-02 |
| <i>ATP1B4</i>          | 1,07  | 7,43E-03 | 6,54E-02 |
| <i>AK128172</i>        | 1,19  | 7,43E-03 | 6,54E-02 |
| <i>SH3BGR</i>          | 1,48  | 7,43E-03 | 6,54E-02 |
| <i>ALDH3A2</i>         | 1,16  | 7,43E-03 | 6,54E-02 |
| <i>ZNF701</i>          | -1,13 | 7,44E-03 | 6,54E-02 |
| <i>BMPR2</i>           | 1,10  | 7,45E-03 | 6,55E-02 |
| <i>HIST1H3C</i>        | 1,15  | 7,45E-03 | 6,55E-02 |
| <i>ENST00000252744</i> | 1,15  | 7,44E-03 | 6,55E-02 |
| <i>A_32_P201620</i>    | 1,27  | 7,46E-03 | 6,56E-02 |
| <i>GART</i>            | -1,08 | 7,46E-03 | 6,56E-02 |
| <i>LOC340109</i>       | -1,16 | 7,47E-03 | 6,56E-02 |
| <i>KIAA0174</i>        | -1,07 | 7,47E-03 | 6,56E-02 |
| <i>LOC652791</i>       | -1,91 | 7,47E-03 | 6,56E-02 |
| <i>HAB1</i>            | 1,18  | 7,48E-03 | 6,56E-02 |
| <i>TTY21</i>           | 1,09  | 7,48E-03 | 6,57E-02 |
| <i>FLJ39575</i>        | 1,18  | 7,49E-03 | 6,57E-02 |
| <i>NPTX2</i>           | 1,39  | 7,49E-03 | 6,57E-02 |
| <i>ENST00000380248</i> | -1,14 | 7,51E-03 | 6,58E-02 |
| <i>EWSR1</i>           | 1,10  | 7,50E-03 | 6,58E-02 |
| <i>C18orf18</i>        | -1,18 | 7,52E-03 | 6,59E-02 |
| <i>AL041007</i>        | -1,12 | 7,54E-03 | 6,60E-02 |
| <i>A_24_P894303</i>    | 1,14  | 7,54E-03 | 6,60E-02 |
| <i>SLC12A4</i>         | 1,15  | 7,55E-03 | 6,61E-02 |
| <i>BC018064</i>        | 1,14  | 7,55E-03 | 6,61E-02 |
| <i>BBS5</i>            | -1,11 | 7,56E-03 | 6,61E-02 |
| <i>THC2366591</i>      | 1,22  | 7,56E-03 | 6,61E-02 |
| <i>C2orf38</i>         | -1,20 | 7,57E-03 | 6,62E-02 |
| <i>MGC33648</i>        | 1,15  | 7,57E-03 | 6,62E-02 |
| <i>DRD5</i>            | 1,10  | 7,59E-03 | 6,63E-02 |
| <i>ENST00000320188</i> | -1,10 | 7,60E-03 | 6,64E-02 |
| <i>ZNF3</i>            | -1,13 | 7,62E-03 | 6,65E-02 |
| <i>A_24_P803809</i>    | 1,09  | 7,62E-03 | 6,65E-02 |
| <i>BQ188318</i>        | 1,13  | 7,62E-03 | 6,65E-02 |
| <i>ENST00000265641</i> | 1,17  | 7,62E-03 | 6,65E-02 |
| <i>CEBPB</i>           | 1,36  | 7,63E-03 | 6,65E-02 |
| <i>C20orf44</i>        | -1,11 | 7,63E-03 | 6,66E-02 |
| <i>THC2316768</i>      | 1,13  | 7,65E-03 | 6,67E-02 |

|                        |       |          |          |
|------------------------|-------|----------|----------|
| <i>HIST2H3PS2</i>      | 1,13  | 7,66E-03 | 6,68E-02 |
| <i>AA359500</i>        | -1,29 | 7,68E-03 | 6,68E-02 |
| <i>CECR5</i>           | -1,11 | 7,68E-03 | 6,68E-02 |
| <i>A_24_P42014</i>     | -1,09 | 7,67E-03 | 6,68E-02 |
| <i>TMED6</i>           | 1,11  | 7,67E-03 | 6,68E-02 |
| <i>THC2436485</i>      | 1,13  | 7,68E-03 | 6,68E-02 |
| <i>THC2285498</i>      | 1,14  | 7,68E-03 | 6,68E-02 |
| <i>BX648950</i>        | -1,14 | 7,69E-03 | 6,69E-02 |
| <i>L3MBTL2</i>         | -1,10 | 7,70E-03 | 6,69E-02 |
| <i>bA16L21.2.1</i>     | -1,13 | 7,70E-03 | 6,70E-02 |
| <i>HTRA4</i>           | -1,14 | 7,71E-03 | 6,70E-02 |
| <i>SALL1</i>           | -1,39 | 7,72E-03 | 6,71E-02 |
| <i>LOC653242</i>       | -1,19 | 7,72E-03 | 6,71E-02 |
| <i>C19orf22</i>        | 1,19  | 7,72E-03 | 6,71E-02 |
| <i>AF086429</i>        | 1,32  | 7,72E-03 | 6,71E-02 |
| <i>ENST00000278505</i> | 1,14  | 7,73E-03 | 6,71E-02 |
| <i>ORC5L</i>           | -1,13 | 7,74E-03 | 6,71E-02 |
| <i>AMELX</i>           | -1,07 | 7,74E-03 | 6,72E-02 |
| <i>ENST00000369797</i> | -1,12 | 7,74E-03 | 6,72E-02 |
| <i>THC2338185</i>      | -1,14 | 7,75E-03 | 6,72E-02 |
| <i>AK024684</i>        | -1,10 | 7,77E-03 | 6,73E-02 |
| <i>C1orf77</i>         | -1,08 | 7,77E-03 | 6,73E-02 |
| <i>GMDS</i>            | 1,13  | 7,76E-03 | 6,73E-02 |
| <i>THC2349739</i>      | 1,22  | 7,76E-03 | 6,73E-02 |
| <i>SURF5</i>           | -1,18 | 7,77E-03 | 6,73E-02 |
| <i>FUCA1</i>           | -1,15 | 7,78E-03 | 6,73E-02 |
| <i>TMEM123</i>         | -1,15 | 7,78E-03 | 6,74E-02 |
| <i>MKLN1</i>           | -1,08 | 7,79E-03 | 6,74E-02 |
| <i>MTMR4</i>           | -1,15 | 7,80E-03 | 6,75E-02 |
| <i>AF130054</i>        | 1,10  | 7,81E-03 | 6,75E-02 |
| <i>CRSP6</i>           | -1,10 | 7,82E-03 | 6,76E-02 |
| <i>RP11-561O23.4</i>   | -1,21 | 7,84E-03 | 6,77E-02 |
| <i>THC2304038</i>      | -1,16 | 7,84E-03 | 6,77E-02 |
| <i>ZNF160</i>          | -1,11 | 7,84E-03 | 6,77E-02 |
| <i>A_32_P187050</i>    | 1,08  | 7,84E-03 | 6,77E-02 |
| <i>BCAS4</i>           | 1,10  | 7,85E-03 | 6,78E-02 |
| <i>DPYD</i>            | -1,12 | 7,86E-03 | 6,79E-02 |
| <i>JAKMIP1</i>         | -1,17 | 7,88E-03 | 6,80E-02 |
| <i>C10orf22</i>        | -1,14 | 7,88E-03 | 6,80E-02 |
| <i>AZI1</i>            | -1,11 | 7,89E-03 | 6,80E-02 |
| <i>40787</i>           | 1,15  | 7,90E-03 | 6,81E-02 |
| <i>SPECC1</i>          | 1,22  | 7,91E-03 | 6,82E-02 |
| <i>AK026078</i>        | 1,19  | 7,92E-03 | 6,82E-02 |
| <i>THC2275950</i>      | -1,27 | 7,93E-03 | 6,83E-02 |

|                        |       |          |          |
|------------------------|-------|----------|----------|
| <i>ENST00000380635</i> | -1,18 | 7,93E-03 | 6,83E-02 |
| <i>KIAA0179</i>        | -1,10 | 7,94E-03 | 6,83E-02 |
| <i>THC2405366</i>      | -1,26 | 7,94E-03 | 6,83E-02 |
| <i>MGC2463</i>         | -1,22 | 7,94E-03 | 6,83E-02 |
| <i>CD53</i>            | -1,21 | 7,95E-03 | 6,83E-02 |
| <i>PRDM10</i>          | -1,11 | 7,95E-03 | 6,83E-02 |
| <i>RTN2</i>            | 1,21  | 7,95E-03 | 6,83E-02 |
| <i>RAB6IP2</i>         | 1,15  | 7,97E-03 | 6,85E-02 |
| <i>MXD1</i>            | 1,18  | 7,97E-03 | 6,85E-02 |
| <i>CECR4</i>           | -1,22 | 7,98E-03 | 6,86E-02 |
| <i>C1QTNF4</i>         | -1,20 | 7,99E-03 | 6,86E-02 |
| <i>NDST1</i>           | 1,11  | 7,99E-03 | 6,86E-02 |
| <i>MESDC2</i>          | -1,12 | 8,00E-03 | 6,87E-02 |
| <i>STYX</i>            | 1,13  | 8,00E-03 | 6,87E-02 |
| <i>KLRF1</i>           | -1,18 | 8,01E-03 | 6,87E-02 |
| <i>AL833456</i>        | 1,18  | 8,01E-03 | 6,87E-02 |
| <i>AK127132</i>        | -1,13 | 8,02E-03 | 6,87E-02 |
| <i>CEP76</i>           | -1,13 | 8,02E-03 | 6,87E-02 |
| <i>COG3</i>            | -1,12 | 8,04E-03 | 6,89E-02 |
| <i>AF086548</i>        | -1,52 | 8,07E-03 | 6,90E-02 |
| <i>AA303143</i>        | -1,30 | 8,06E-03 | 6,90E-02 |
| <i>LENG10</i>          | -1,12 | 8,07E-03 | 6,90E-02 |
| <i>SNRPA</i>           | -1,11 | 8,06E-03 | 6,90E-02 |
| <i>AVEN</i>            | 1,14  | 8,06E-03 | 6,90E-02 |
| <i>A_24_P540560</i>    | 1,16  | 8,07E-03 | 6,90E-02 |
| <i>A_23_P136013</i>    | 1,20  | 8,07E-03 | 6,90E-02 |
| <i>F5</i>              | 1,22  | 8,07E-03 | 6,90E-02 |
| <i>CABLES1</i>         | 1,22  | 8,07E-03 | 6,90E-02 |
| <i>A_24_P944478</i>    | -1,15 | 8,08E-03 | 6,90E-02 |
| <i>PLCB4</i>           | 1,18  | 8,08E-03 | 6,90E-02 |
| <i>RFNG</i>            | 1,10  | 8,09E-03 | 6,91E-02 |
| <i>SLC6A17</i>         | 1,12  | 8,09E-03 | 6,91E-02 |
| <i>NFKBIB</i>          | 1,12  | 8,09E-03 | 6,91E-02 |
| <i>DAZL</i>            | 1,18  | 8,10E-03 | 6,91E-02 |
| <i>KCNE3</i>           | -1,31 | 8,11E-03 | 6,92E-02 |
| <i>NAT1</i>            | -1,27 | 8,11E-03 | 6,92E-02 |
| <i>AF086551</i>        | -1,12 | 8,13E-03 | 6,93E-02 |
| <i>CYP7A1</i>          | 1,09  | 8,13E-03 | 6,93E-02 |
| <i>A_32_P10165</i>     | 1,13  | 8,13E-03 | 6,93E-02 |
| <i>CB987747</i>        | -1,11 | 8,14E-03 | 6,94E-02 |
| <i>KRTAP4-6</i>        | -1,09 | 8,15E-03 | 6,94E-02 |
| <i>ABHD7</i>           | 1,15  | 8,14E-03 | 6,94E-02 |
| <i>GPR3</i>            | 1,08  | 8,15E-03 | 6,94E-02 |
| <i>C1orf107</i>        | -1,13 | 8,15E-03 | 6,94E-02 |

|                        |       |          |          |
|------------------------|-------|----------|----------|
| <i>CR627135</i>        | 1,17  | 8,17E-03 | 6,95E-02 |
| <i>COX17</i>           | 1,14  | 8,17E-03 | 6,95E-02 |
| <i>BI828537</i>        | -1,16 | 8,18E-03 | 6,95E-02 |
| <i>FAM91A1</i>         | 1,12  | 8,18E-03 | 6,96E-02 |
| <i>THC2336826</i>      | -1,10 | 8,20E-03 | 6,97E-02 |
| <i>PAK2</i>            | 1,09  | 8,20E-03 | 6,97E-02 |
| <i>ZNF92</i>           | -1,16 | 8,21E-03 | 6,97E-02 |
| <i>LYSMD3</i>          | -1,15 | 8,21E-03 | 6,97E-02 |
| <i>CNO</i>             | -1,16 | 8,22E-03 | 6,98E-02 |
| <i>ENST00000333891</i> | 1,14  | 8,22E-03 | 6,98E-02 |
| <i>LRRN6A</i>          | -1,09 | 8,24E-03 | 6,99E-02 |
| <i>LOC284072</i>       | 1,13  | 8,24E-03 | 6,99E-02 |
| <i>RAB20</i>           | 1,23  | 8,24E-03 | 6,99E-02 |
| <i>KIAA0323</i>        | -1,09 | 8,25E-03 | 6,99E-02 |
| <i>A_24_P195327</i>    | 1,09  | 8,25E-03 | 6,99E-02 |
| <i>OLFML2B</i>         | 1,20  | 8,25E-03 | 6,99E-02 |
| <i>AK091308</i>        | -1,14 | 8,26E-03 | 6,99E-02 |
| <i>BX110908</i>        | -1,20 | 8,26E-03 | 6,99E-02 |
| <i>THC2408868</i>      | -1,13 | 8,27E-03 | 7,00E-02 |
| <i>ARHGAP25</i>        | -1,19 | 8,29E-03 | 7,02E-02 |
| <i>AB063751</i>        | -1,80 | 8,30E-03 | 7,02E-02 |
| <i>A_23_P113263</i>    | 1,18  | 8,30E-03 | 7,02E-02 |
| <i>GRIK2</i>           | 1,19  | 8,31E-03 | 7,03E-02 |
| <i>FLJ14981</i>        | 1,11  | 8,31E-03 | 7,03E-02 |
| <i>NBPF15</i>          | -1,11 | 8,33E-03 | 7,04E-02 |
| <i>MDS1</i>            | 1,13  | 8,33E-03 | 7,04E-02 |
| <i>CR616309</i>        | 1,15  | 8,33E-03 | 7,04E-02 |
| <i>SLC26A4</i>         | -1,24 | 8,35E-03 | 7,04E-02 |
| <i>A_32_P177097</i>    | -1,19 | 8,34E-03 | 7,04E-02 |
| <i>IQCA</i>            | -1,16 | 8,34E-03 | 7,04E-02 |
| <i>DVL2</i>            | -1,15 | 8,35E-03 | 7,04E-02 |
| <i>A_24_P794833</i>    | 1,10  | 8,35E-03 | 7,04E-02 |
| <i>AF086286</i>        | 1,13  | 8,34E-03 | 7,04E-02 |
| <i>TMEM110</i>         | 1,13  | 8,35E-03 | 7,04E-02 |
| <i>SNF1LK</i>          | 1,14  | 8,35E-03 | 7,04E-02 |
| <i>THC2340991</i>      | 1,15  | 8,35E-03 | 7,04E-02 |
| <i>AF471475</i>        | -1,31 | 8,36E-03 | 7,04E-02 |
| <i>HDC</i>             | -1,48 | 8,38E-03 | 7,05E-02 |
| <i>FGF12</i>           | -1,42 | 8,37E-03 | 7,05E-02 |
| <i>AMPD3</i>           | -1,26 | 8,38E-03 | 7,05E-02 |
| <i>GRAP</i>            | -1,17 | 8,38E-03 | 7,05E-02 |
| <i>HCCS</i>            | 1,10  | 8,37E-03 | 7,05E-02 |
| <i>C9orf130</i>        | 1,16  | 8,37E-03 | 7,05E-02 |
| <i>ENST00000343905</i> | -1,17 | 8,38E-03 | 7,05E-02 |

|                        |       |          |          |
|------------------------|-------|----------|----------|
| <i>AK025360</i>        | -1,21 | 8,39E-03 | 7,05E-02 |
| <i>CUL7</i>            | -1,11 | 8,39E-03 | 7,05E-02 |
| <i>CFHR3</i>           | 1,43  | 8,39E-03 | 7,05E-02 |
| <i>AK025797</i>        | -1,14 | 8,41E-03 | 7,05E-02 |
| <i>EPHX1</i>           | -1,13 | 8,40E-03 | 7,05E-02 |
| <i>CCDC71</i>          | -1,12 | 8,40E-03 | 7,05E-02 |
| <i>H1FNT</i>           | 1,11  | 8,40E-03 | 7,05E-02 |
| <i>S81524</i>          | 1,14  | 8,41E-03 | 7,05E-02 |
| <i>THC2374814</i>      | -1,21 | 8,42E-03 | 7,06E-02 |
| <i>THC2381954</i>      | -1,20 | 8,42E-03 | 7,06E-02 |
| <i>BQ072652</i>        | -1,13 | 8,41E-03 | 7,06E-02 |
| <i>PAPOLG</i>          | -1,12 | 8,42E-03 | 7,06E-02 |
| <i>CXorf26</i>         | 1,10  | 8,42E-03 | 7,06E-02 |
| <i>ENST00000343998</i> | 1,15  | 8,42E-03 | 7,06E-02 |
| <i>DOCK5</i>           | 1,17  | 8,42E-03 | 7,06E-02 |
| <i>UBE2NL</i>          | 1,20  | 8,43E-03 | 7,06E-02 |
| <i>PLAGL1</i>          | -1,28 | 8,43E-03 | 7,06E-02 |
| <i>ZSWIM1</i>          | -1,13 | 8,43E-03 | 7,06E-02 |
| <i>ZCCHC12</i>         | -1,89 | 8,44E-03 | 7,06E-02 |
| <i>TRIM31</i>          | -1,11 | 8,45E-03 | 7,06E-02 |
| <i>NP103207</i>        | -1,07 | 8,45E-03 | 7,06E-02 |
| <i>BPGM</i>            | 1,13  | 8,45E-03 | 7,06E-02 |
| <i>THC2372788</i>      | 1,15  | 8,45E-03 | 7,06E-02 |
| <i>NKRF</i>            | -1,08 | 8,47E-03 | 7,08E-02 |
| <i>SSX5</i>            | 1,08  | 8,48E-03 | 7,08E-02 |
| <i>IL17RB</i>          | -1,98 | 8,48E-03 | 7,08E-02 |
| <i>KIAA1026</i>        | 1,24  | 8,48E-03 | 7,08E-02 |
| <i>THC2316116</i>      | 1,24  | 8,50E-03 | 7,09E-02 |
| <i>B4GALNT4</i>        | -1,16 | 8,51E-03 | 7,09E-02 |
| <i>DMRTA1</i>          | -1,15 | 8,51E-03 | 7,09E-02 |
| <i>MTX3</i>            | -1,14 | 8,51E-03 | 7,09E-02 |
| <i>SRGAP3</i>          | -1,09 | 8,51E-03 | 7,09E-02 |
| <i>THC2342491</i>      | -1,16 | 8,51E-03 | 7,10E-02 |
| <i>C1orf84</i>         | -1,12 | 8,52E-03 | 7,10E-02 |
| <i>AK096387</i>        | 1,10  | 8,53E-03 | 7,10E-02 |
| <i>C14orf169</i>       | -1,12 | 8,53E-03 | 7,10E-02 |
| <i>A_24_P938583</i>    | -1,10 | 8,54E-03 | 7,11E-02 |
| <i>DNALI1</i>          | 1,29  | 8,55E-03 | 7,12E-02 |
| <i>AK096512</i>        | -1,12 | 8,56E-03 | 7,12E-02 |
| <i>EVA1</i>            | -1,21 | 8,57E-03 | 7,13E-02 |
| <i>TUBB3</i>           | 1,23  | 8,57E-03 | 7,13E-02 |
| <i>GPC6</i>            | 1,27  | 8,57E-03 | 7,13E-02 |
| <i>TUSC4</i>           | -1,11 | 8,59E-03 | 7,14E-02 |
| <i>AK097743</i>        | 1,07  | 8,59E-03 | 7,14E-02 |

|                        |       |          |          |
|------------------------|-------|----------|----------|
| <i>MIOX</i>            | 1,12  | 8,59E-03 | 7,14E-02 |
| <i>PPIL4</i>           | 1,16  | 8,61E-03 | 7,15E-02 |
| <i>AT_ssH_PC_5</i>     | 1,17  | 8,61E-03 | 7,15E-02 |
| <i>ENST00000258451</i> | 1,15  | 8,63E-03 | 7,17E-02 |
| <i>A_32_P88555</i>     | -1,11 | 8,64E-03 | 7,17E-02 |
| <i>ITGB4</i>           | 1,20  | 8,64E-03 | 7,17E-02 |
| <i>AJ319669</i>        | -2,11 | 8,64E-03 | 7,17E-02 |
| <i>CD48</i>            | -1,36 | 8,65E-03 | 7,17E-02 |
| <i>C8orf6</i>          | -1,18 | 8,65E-03 | 7,17E-02 |
| <i>MRAP</i>            | 1,20  | 8,65E-03 | 7,17E-02 |
| <i>MUC6</i>            | 1,11  | 8,66E-03 | 7,17E-02 |
| <i>COQ10A</i>          | -1,10 | 8,67E-03 | 7,18E-02 |
| <i>NDN</i>             | -1,11 | 8,69E-03 | 7,20E-02 |
| <i>A_24_P924240</i>    | -1,19 | 8,69E-03 | 7,20E-02 |
| <i>ARHGAP15</i>        | 1,14  | 8,70E-03 | 7,20E-02 |
| <i>ENST00000379913</i> | -2,47 | 8,70E-03 | 7,20E-02 |
| <i>ZNF708</i>          | -1,17 | 8,71E-03 | 7,21E-02 |
| <i>PANK2</i>           | -1,08 | 8,73E-03 | 7,22E-02 |
| <i>A_24_P760324</i>    | -1,15 | 8,73E-03 | 7,22E-02 |
| <i>TTC18</i>           | -1,14 | 8,74E-03 | 7,22E-02 |
| <i>ZNF100</i>          | -1,16 | 8,74E-03 | 7,22E-02 |
| <i>C6orf170</i>        | -1,10 | 8,75E-03 | 7,22E-02 |
| <i>THC2313031</i>      | -1,09 | 8,75E-03 | 7,22E-02 |
| <i>GALNACT-2</i>       | 1,09  | 8,75E-03 | 7,22E-02 |
| <i>A_24_P891472</i>    | 1,12  | 8,75E-03 | 7,22E-02 |
| <i>BTK</i>             | -1,18 | 8,75E-03 | 7,23E-02 |
| <i>TTY3</i>            | 1,16  | 8,78E-03 | 7,24E-02 |
| <i>AW950828</i>        | 1,29  | 8,78E-03 | 7,24E-02 |
| <i>SYT4</i>            | 2,08  | 8,79E-03 | 7,25E-02 |
| <i>THC2316753</i>      | 1,28  | 8,82E-03 | 7,27E-02 |
| <i>C14orf81</i>        | 1,11  | 8,84E-03 | 7,28E-02 |
| <i>BC043279</i>        | 1,30  | 8,83E-03 | 7,28E-02 |
| <i>TNFRSF9</i>         | 1,14  | 8,84E-03 | 7,29E-02 |
| <i>A_24_P932355</i>    | 1,16  | 8,85E-03 | 7,29E-02 |
| <i>C11orf54</i>        | -1,10 | 8,85E-03 | 7,29E-02 |
| <i>ENST00000360623</i> | -1,53 | 8,87E-03 | 7,30E-02 |
| <i>BU685299</i>        | -1,15 | 8,88E-03 | 7,30E-02 |
| <i>AL136602</i>        | 1,10  | 8,88E-03 | 7,30E-02 |
| <i>THC2415423</i>      | 1,10  | 8,88E-03 | 7,31E-02 |
| <i>ENST00000313807</i> | -1,14 | 8,89E-03 | 7,31E-02 |
| <i>ENST00000307366</i> | -1,11 | 8,89E-03 | 7,31E-02 |
| <i>THC2407330</i>      | -1,17 | 8,89E-03 | 7,31E-02 |
| <i>AK123483</i>        | -1,18 | 8,90E-03 | 7,31E-02 |
| <i>SERPINB1</i>        | 1,34  | 8,90E-03 | 7,31E-02 |

|                        |       |          |          |
|------------------------|-------|----------|----------|
| <i>DNAJA3</i>          | -1,13 | 8,92E-03 | 7,33E-02 |
| <i>A_24_P477102</i>    | 1,10  | 8,93E-03 | 7,33E-02 |
| <i>PIGM</i>            | -1,10 | 8,94E-03 | 7,34E-02 |
| <i>ZFP64</i>           | -1,11 | 8,96E-03 | 7,35E-02 |
| <i>ZNF653</i>          | 1,14  | 8,96E-03 | 7,35E-02 |
| <i>GUCY1B3</i>         | 1,21  | 8,96E-03 | 7,35E-02 |
| <i>C15orf2</i>         | 1,11  | 8,97E-03 | 7,35E-02 |
| <i>THC2408833</i>      | 1,11  | 8,98E-03 | 7,36E-02 |
| <i>THC2377398</i>      | 1,12  | 8,98E-03 | 7,36E-02 |
| <i>C18orf2</i>         | 1,08  | 8,99E-03 | 7,37E-02 |
| <i>ATG4C</i>           | -1,11 | 9,00E-03 | 7,37E-02 |
| <i>ZCCHC8</i>          | -1,14 | 9,00E-03 | 7,37E-02 |
| <i>RLBP1</i>           | 1,10  | 9,01E-03 | 7,37E-02 |
| <i>CTGF</i>            | 1,59  | 9,01E-03 | 7,37E-02 |
| <i>HSDL1</i>           | -1,14 | 9,04E-03 | 7,39E-02 |
| <i>EXTL1</i>           | -1,14 | 9,04E-03 | 7,39E-02 |
| <i>CHIC2</i>           | 1,16  | 9,04E-03 | 7,39E-02 |
| <i>FBXL11</i>          | 1,17  | 9,04E-03 | 7,39E-02 |
| <i>FLJ25222</i>        | -1,11 | 9,04E-03 | 7,39E-02 |
| <i>THC2304788</i>      | 1,15  | 9,05E-03 | 7,39E-02 |
| <i>GIMAP5</i>          | -1,22 | 9,05E-03 | 7,39E-02 |
| <i>LOC402560</i>       | -1,15 | 9,05E-03 | 7,39E-02 |
| <i>ENST00000307198</i> | 1,14  | 9,06E-03 | 7,40E-02 |
| <i>CD390145</i>        | -1,08 | 9,07E-03 | 7,40E-02 |
| <i>CCDC81</i>          | 1,22  | 9,07E-03 | 7,40E-02 |
| <i>CD103176</i>        | 1,28  | 9,07E-03 | 7,40E-02 |
| <i>THC2316552</i>      | -1,19 | 9,07E-03 | 7,40E-02 |
| <i>ECE1</i>            | 1,21  | 9,08E-03 | 7,40E-02 |
| <i>DCLRE1A</i>         | -1,15 | 9,08E-03 | 7,40E-02 |
| <i>A_23_P4462</i>      | -1,13 | 9,08E-03 | 7,40E-02 |
| <i>TRAM1L1</i>         | -1,15 | 9,09E-03 | 7,40E-02 |
| <i>THC2409506</i>      | -1,12 | 9,09E-03 | 7,41E-02 |
| <i>UBTD1</i>           | 1,14  | 9,10E-03 | 7,41E-02 |
| <i>CHEK1</i>           | 1,14  | 9,11E-03 | 7,41E-02 |
| <i>TMEM56</i>          | 1,24  | 9,12E-03 | 7,42E-02 |
| <i>A_24_P628683</i>    | -1,14 | 9,13E-03 | 7,43E-02 |
| <i>BI521983</i>        | -1,68 | 9,13E-03 | 7,43E-02 |
| <i>IPO9</i>            | -1,09 | 9,13E-03 | 7,43E-02 |
| <i>PIK3CB</i>          | 1,12  | 9,13E-03 | 7,43E-02 |
| <i>BG118529</i>        | -1,28 | 9,15E-03 | 7,43E-02 |
| <i>CR625518</i>        | -1,12 | 9,15E-03 | 7,43E-02 |
| <i>FLJ32065</i>        | -1,10 | 9,15E-03 | 7,43E-02 |
| <i>HOOK3</i>           | 1,14  | 9,14E-03 | 7,43E-02 |
| <i>ZNF532</i>          | 1,21  | 9,15E-03 | 7,43E-02 |



|                        |       |          |          |
|------------------------|-------|----------|----------|
| <i>RORA</i>            | 1,23  | 9,15E-03 | 7,43E-02 |
| <i>THC2438621</i>      | -1,20 | 9,15E-03 | 7,43E-02 |
| <i>SFXN2</i>           | -1,18 | 9,18E-03 | 7,44E-02 |
| <i>FOXK1</i>           | -1,12 | 9,19E-03 | 7,44E-02 |
| <i>C4orf15</i>         | -1,12 | 9,18E-03 | 7,44E-02 |
| <i>C6orf167</i>        | -1,07 | 9,18E-03 | 7,44E-02 |
| <i>BE175081</i>        | 1,13  | 9,19E-03 | 7,44E-02 |
| <i>ZC3H11A</i>         | -1,08 | 9,19E-03 | 7,45E-02 |
| <i>GCNT4</i>           | 1,11  | 9,19E-03 | 7,45E-02 |
| <i>AK092942</i>        | -1,15 | 9,20E-03 | 7,45E-02 |
| <i>ENST00000358356</i> | 1,30  | 9,21E-03 | 7,45E-02 |
| <i>TNRC6A</i>          | -1,16 | 9,21E-03 | 7,46E-02 |
| <i>A_32_P75141</i>     | -1,29 | 9,23E-03 | 7,46E-02 |
| <i>HIPK1</i>           | 1,09  | 9,22E-03 | 7,46E-02 |
| <i>GPD2</i>            | 1,13  | 9,22E-03 | 7,46E-02 |
| <i>THC2375798</i>      | -1,19 | 9,23E-03 | 7,47E-02 |
| <i>ENST00000377275</i> | 1,37  | 9,25E-03 | 7,48E-02 |
| <i>DPPA2</i>           | 1,11  | 9,26E-03 | 7,48E-02 |
| <i>ARPC5</i>           | 1,18  | 9,26E-03 | 7,48E-02 |
| <i>CHI3L2</i>          | 1,64  | 9,27E-03 | 7,48E-02 |
| <i>LOC145853</i>       | -1,12 | 9,28E-03 | 7,49E-02 |
| <i>MGC13008</i>        | -1,11 | 9,28E-03 | 7,49E-02 |
| <i>NCOA5</i>           | -1,11 | 9,28E-03 | 7,49E-02 |
| <i>LRRC8E</i>          | 1,29  | 9,29E-03 | 7,49E-02 |
| <i>SNX13</i>           | 1,09  | 9,32E-03 | 7,52E-02 |
| <i>CDS2</i>            | 1,13  | 9,33E-03 | 7,52E-02 |
| <i>AW972815</i>        | 1,08  | 9,34E-03 | 7,53E-02 |
| <i>HCST</i>            | -1,27 | 9,34E-03 | 7,53E-02 |
| <i>ENST00000360201</i> | -1,09 | 9,35E-03 | 7,53E-02 |
| <i>BC025734</i>        | -1,11 | 9,37E-03 | 7,55E-02 |
| <i>FLJ39370</i>        | 1,14  | 9,37E-03 | 7,55E-02 |
| <i>KRTAP4-7</i>        | -1,17 | 9,37E-03 | 7,55E-02 |
| <i>DOLPP1</i>          | -1,11 | 9,38E-03 | 7,55E-02 |
| <i>ENST00000323570</i> | -1,09 | 9,38E-03 | 7,55E-02 |
| <i>MGC16169</i>        | -1,09 | 9,39E-03 | 7,55E-02 |
| <i>EYA3</i>            | -1,10 | 9,40E-03 | 7,56E-02 |
| <i>ENST00000358431</i> | 1,15  | 9,40E-03 | 7,56E-02 |
| <i>LOC440335</i>       | -1,09 | 9,43E-03 | 7,58E-02 |
| <i>MINPP1</i>          | -1,14 | 9,45E-03 | 7,59E-02 |
| <i>USP34</i>           | -1,13 | 9,45E-03 | 7,59E-02 |
| <i>AAAS</i>            | -1,11 | 9,45E-03 | 7,59E-02 |
| <i>C22orf16</i>        | 1,14  | 9,45E-03 | 7,59E-02 |
| <i>MYO1B</i>           | 1,16  | 9,45E-03 | 7,59E-02 |
| <i>APBA3</i>           | -1,12 | 9,46E-03 | 7,59E-02 |

|                        |       |          |          |
|------------------------|-------|----------|----------|
| <i>FLJ20551</i>        | -1,12 | 9,46E-03 | 7,59E-02 |
| <i>AW134708</i>        | 1,09  | 9,46E-03 | 7,59E-02 |
| <i>AF174394</i>        | 1,11  | 9,47E-03 | 7,59E-02 |
| <i>MPP5</i>            | 1,12  | 9,46E-03 | 7,59E-02 |
| <i>HEMK2</i>           | -1,12 | 9,48E-03 | 7,60E-02 |
| <i>PRLR</i>            | -1,23 | 9,49E-03 | 7,60E-02 |
| <i>USP1</i>            | -1,11 | 9,50E-03 | 7,60E-02 |
| <i>ARSG</i>            | 1,06  | 9,49E-03 | 7,60E-02 |
| <i>LOH12CR1</i>        | 1,08  | 9,49E-03 | 7,60E-02 |
| <i>PCGF5</i>           | 1,13  | 9,50E-03 | 7,60E-02 |
| <i>JMY</i>             | 1,17  | 9,49E-03 | 7,60E-02 |
| <i>EDNRA</i>           | -1,39 | 9,51E-03 | 7,60E-02 |
| <i>THC2441733</i>      | -1,10 | 9,50E-03 | 7,60E-02 |
| <i>THC2415297</i>      | 1,19  | 9,50E-03 | 7,60E-02 |
| <i>ENST00000162863</i> | -1,13 | 9,52E-03 | 7,61E-02 |
| <i>LOC150166</i>       | -1,13 | 9,52E-03 | 7,61E-02 |
| <i>BC053353</i>        | -1,11 | 9,52E-03 | 7,61E-02 |
| <i>AGBL2</i>           | -1,15 | 9,53E-03 | 7,61E-02 |
| <i>AA081809</i>        | -1,08 | 9,53E-03 | 7,61E-02 |
| <i>BC063441</i>        | 1,17  | 9,57E-03 | 7,64E-02 |
| <i>CXorf15</i>         | 1,18  | 9,56E-03 | 7,64E-02 |
| <i>SOCS3</i>           | 2,50  | 9,60E-03 | 7,66E-02 |
| <i>THC2373077</i>      | 1,10  | 9,61E-03 | 7,67E-02 |
| <i>CDCA7</i>           | -1,48 | 9,62E-03 | 7,68E-02 |
| <i>LOC149351</i>       | -1,12 | 9,63E-03 | 7,68E-02 |
| <i>ANXA10</i>          | -1,11 | 9,63E-03 | 7,68E-02 |
| <i>BM461836</i>        | -1,18 | 9,64E-03 | 7,68E-02 |
| <i>C13orf7</i>         | -1,16 | 9,64E-03 | 7,68E-02 |
| <i>CR604497</i>        | 1,08  | 9,65E-03 | 7,69E-02 |
| <i>LOC400236</i>       | 1,11  | 9,65E-03 | 7,69E-02 |
| <i>GMPS</i>            | 1,13  | 9,65E-03 | 7,69E-02 |
| <i>CCDC51</i>          | -1,16 | 9,66E-03 | 7,69E-02 |
| <i>GFM2</i>            | -1,10 | 9,69E-03 | 7,71E-02 |
| <i>ENST00000354349</i> | -1,16 | 9,70E-03 | 7,72E-02 |
| <i>THC2437492</i>      | 1,10  | 9,71E-03 | 7,72E-02 |
| <i>KIAA0241</i>        | 1,10  | 9,72E-03 | 7,73E-02 |
| <i>AI925475</i>        | 1,11  | 9,72E-03 | 7,73E-02 |
| <i>SHFM3P1</i>         | 1,16  | 9,72E-03 | 7,73E-02 |
| <i>TNFAIP3</i>         | 1,59  | 9,72E-03 | 7,73E-02 |
| <i>UBE2E1</i>          | -1,11 | 9,73E-03 | 7,73E-02 |
| <i>LYSMD1</i>          | -1,13 | 9,73E-03 | 7,73E-02 |
| <i>AF487905</i>        | 1,12  | 9,74E-03 | 7,74E-02 |
| <i>IPO8</i>            | 1,20  | 9,75E-03 | 7,74E-02 |
| <i>BC024651</i>        | -1,14 | 9,75E-03 | 7,74E-02 |

|                        |       |          |          |
|------------------------|-------|----------|----------|
| <i>THC2342473</i>      | -1,15 | 9,76E-03 | 7,75E-02 |
| <i>CHDH</i>            | -1,32 | 9,77E-03 | 7,75E-02 |
| <i>AF113698</i>        | 1,13  | 9,77E-03 | 7,75E-02 |
| <i>A_24_P594094</i>    | 1,18  | 9,77E-03 | 7,75E-02 |
| <i>C8orf16</i>         | -1,18 | 9,78E-03 | 7,75E-02 |
| <i>FLJ35220</i>        | -1,19 | 9,79E-03 | 7,76E-02 |
| <i>HDGF</i>            | 1,13  | 9,79E-03 | 7,76E-02 |
| <i>ENST00000375732</i> | 1,25  | 9,79E-03 | 7,76E-02 |
| <i>CSTF3</i>           | -1,08 | 9,80E-03 | 7,76E-02 |
| <i>POLR1B</i>          | -1,11 | 9,81E-03 | 7,76E-02 |
| <i>SLC16A7</i>         | 1,15  | 9,82E-03 | 7,77E-02 |
| <i>ANKRD46</i>         | -1,16 | 9,82E-03 | 7,77E-02 |
| <i>RBM28</i>           | 1,09  | 9,83E-03 | 7,77E-02 |
| <i>HSPA1L</i>          | -1,14 | 9,84E-03 | 7,78E-02 |
| <i>LOC644799</i>       | -1,09 | 9,84E-03 | 7,78E-02 |
| <i>DA834198</i>        | -1,18 | 9,85E-03 | 7,78E-02 |
| <i>KRT37</i>           | -1,65 | 9,85E-03 | 7,79E-02 |
| <i>CNTN3</i>           | 1,37  | 9,86E-03 | 7,79E-02 |
| <i>A_24_P565908</i>    | 1,08  | 9,87E-03 | 7,80E-02 |
| <i>A_24_P256073</i>    | -1,09 | 9,88E-03 | 7,81E-02 |
| <i>ZNF235</i>          | -1,15 | 9,89E-03 | 7,81E-02 |
| <i>CALCRL</i>          | 1,21  | 9,91E-03 | 7,82E-02 |
| <i>BC062473</i>        | -1,44 | 9,91E-03 | 7,82E-02 |
| <i>C6orf70</i>         | -1,10 | 9,92E-03 | 7,82E-02 |
| <i>KCNK18</i>          | 1,08  | 9,92E-03 | 7,82E-02 |
| <i>TOP2B</i>           | -1,09 | 9,94E-03 | 7,84E-02 |
| <i>AK094623</i>        | -1,13 | 9,94E-03 | 7,84E-02 |
| <i>MAP4K1</i>          | -1,17 | 9,95E-03 | 7,84E-02 |
| <i>ZXDC</i>            | -1,11 | 9,98E-03 | 7,86E-02 |
| <i>AI308948</i>        | 1,09  | 9,99E-03 | 7,87E-02 |
| <i>AF086187</i>        | 1,28  | 9,99E-03 | 7,87E-02 |
| <i>AW998865</i>        | -1,15 | 1,00E-02 | 7,90E-02 |
| <i>TLR3</i>            | -1,11 | 1,00E-02 | 7,90E-02 |
| <i>ENST00000261569</i> | 1,14  | 1,00E-02 | 7,90E-02 |
| <i>TMEM155</i>         | 1,15  | 1,00E-02 | 7,90E-02 |
| <i>THC2383313</i>      | 1,16  | 1,00E-02 | 7,90E-02 |
| <i>ZNF354B</i>         | -1,12 | 1,01E-02 | 7,91E-02 |
| <i>AK026418</i>        | -1,23 | 1,01E-02 | 7,95E-02 |
| <i>CSF2</i>            | 1,16  | 1,01E-02 | 7,96E-02 |
| <i>HIF1A</i>           | 1,19  | 1,01E-02 | 7,96E-02 |
| <i>A_24_P205307</i>    | -1,10 | 1,01E-02 | 7,96E-02 |
| <i>SLC41A1</i>         | 1,15  | 1,01E-02 | 7,96E-02 |
| <i>AA663883</i>        | 1,15  | 1,01E-02 | 7,96E-02 |
| <i>AK025082</i>        | -1,16 | 1,02E-02 | 7,97E-02 |

|                        |       |          |          |
|------------------------|-------|----------|----------|
| <i>BC029580</i>        | -1,11 | 1,02E-02 | 7,97E-02 |
| <i>PER1</i>            | 1,46  | 1,02E-02 | 7,97E-02 |
| <i>RASSF2</i>          | -1,25 | 1,02E-02 | 7,98E-02 |
| <i>AW948903</i>        | 1,17  | 1,02E-02 | 7,98E-02 |
| <i>IER5L</i>           | 1,22  | 1,02E-02 | 7,98E-02 |
| <i>CR594732</i>        | -1,11 | 1,02E-02 | 7,98E-02 |
| <i>IGHA1</i>           | -1,86 | 1,02E-02 | 7,99E-02 |
| <i>A_24_P401392</i>    | 1,14  | 1,02E-02 | 8,01E-02 |
| <i>UNG</i>             | -1,13 | 1,02E-02 | 8,01E-02 |
| <i>SERBP1</i>          | 1,10  | 1,02E-02 | 8,01E-02 |
| <i>HIST1H4F</i>        | 1,16  | 1,02E-02 | 8,02E-02 |
| <i>ZNF385</i>          | 1,23  | 1,02E-02 | 8,02E-02 |
| <i>STRN3</i>           | 1,10  | 1,03E-02 | 8,02E-02 |
| <i>MAP4</i>            | 1,13  | 1,03E-02 | 8,02E-02 |
| <i>LOC646038</i>       | -1,39 | 1,03E-02 | 8,03E-02 |
| <i>TRPM5</i>           | 1,12  | 1,03E-02 | 8,04E-02 |
| <i>ENST00000366964</i> | -1,10 | 1,03E-02 | 8,05E-02 |
| <i>AK025758</i>        | 1,41  | 1,03E-02 | 8,05E-02 |
| <i>PTER</i>            | -1,14 | 1,03E-02 | 8,06E-02 |
| <i>BC020241</i>        | -1,10 | 1,03E-02 | 8,06E-02 |
| <i>LOC653068</i>       | 1,10  | 1,03E-02 | 8,06E-02 |
| <i>PPP3R1</i>          | 1,12  | 1,03E-02 | 8,06E-02 |
| <i>TRIM22</i>          | -1,13 | 1,03E-02 | 8,06E-02 |
| <i>THC2334472</i>      | 1,17  | 1,03E-02 | 8,07E-02 |
| <i>A_24_P739785</i>    | -1,16 | 1,03E-02 | 8,07E-02 |
| <i>LRRC61</i>          | -1,20 | 1,04E-02 | 8,07E-02 |
| <i>ENST00000262525</i> | -1,13 | 1,04E-02 | 8,08E-02 |
| <i>ZNF143</i>          | 1,11  | 1,04E-02 | 8,10E-02 |
| <i>CR598370</i>        | -1,23 | 1,04E-02 | 8,10E-02 |
| <i>BC064492</i>        | -1,19 | 1,04E-02 | 8,10E-02 |
| <i>KCNIP2</i>          | -1,11 | 1,04E-02 | 8,10E-02 |
| <i>LY6H</i>            | -1,41 | 1,04E-02 | 8,11E-02 |
| <i>LOC200230</i>       | -1,24 | 1,04E-02 | 8,11E-02 |
| <i>A_32_P28158</i>     | -1,10 | 1,04E-02 | 8,11E-02 |
| <i>FGFR4</i>           | 1,15  | 1,04E-02 | 8,11E-02 |
| <i>A_24_P230057</i>    | 1,35  | 1,04E-02 | 8,11E-02 |
| <i>THC2356527</i>      | -1,54 | 1,04E-02 | 8,11E-02 |
| <i>ABCB6</i>           | -1,15 | 1,04E-02 | 8,11E-02 |
| <i>BUD31</i>           | 1,10  | 1,04E-02 | 8,12E-02 |
| <i>LSM8</i>            | 1,12  | 1,04E-02 | 8,12E-02 |
| <i>THC2282782</i>      | -1,17 | 1,05E-02 | 8,13E-02 |
| <i>GPRASP2</i>         | -1,13 | 1,05E-02 | 8,13E-02 |
| <i>ZNF613</i>          | -1,12 | 1,05E-02 | 8,13E-02 |
| <i>THC2250585</i>      | -1,20 | 1,05E-02 | 8,13E-02 |

|                        |       |          |          |
|------------------------|-------|----------|----------|
| <i>EXOC1</i>           | -1,09 | 1,05E-02 | 8,13E-02 |
| <i>ZNF410</i>          | 1,12  | 1,05E-02 | 8,13E-02 |
| <i>JAG2</i>            | 1,22  | 1,05E-02 | 8,13E-02 |
| <i>AA973155</i>        | -1,12 | 1,05E-02 | 8,14E-02 |
| <i>A_24_P58899</i>     | 1,10  | 1,05E-02 | 8,15E-02 |
| <i>ZNF135</i>          | -1,11 | 1,05E-02 | 8,15E-02 |
| <i>MTMR8</i>           | 1,16  | 1,05E-02 | 8,15E-02 |
| <i>AL037389</i>        | -1,12 | 1,06E-02 | 8,17E-02 |
| <i>LAGE3</i>           | -1,12 | 1,06E-02 | 8,17E-02 |
| <i>AY358728</i>        | -1,10 | 1,06E-02 | 8,17E-02 |
| <i>ATP11A</i>          | -1,11 | 1,06E-02 | 8,18E-02 |
| <i>RP11-119E20.1</i>   | 1,28  | 1,06E-02 | 8,19E-02 |
| <i>FLJ37464</i>        | -1,10 | 1,06E-02 | 8,20E-02 |
| <i>FBXL3</i>           | -1,14 | 1,06E-02 | 8,20E-02 |
| <i>BMP10</i>           | 1,07  | 1,06E-02 | 8,21E-02 |
| <i>C1orf178</i>        | 1,09  | 1,06E-02 | 8,22E-02 |
| <i>CASP8AP2</i>        | -1,17 | 1,06E-02 | 8,23E-02 |
| <i>CNOT8</i>           | -1,15 | 1,07E-02 | 8,23E-02 |
| <i>THC2322794</i>      | -1,14 | 1,07E-02 | 8,23E-02 |
| <i>CXXC5</i>           | 1,21  | 1,07E-02 | 8,23E-02 |
| <i>AK054569</i>        | 1,23  | 1,07E-02 | 8,24E-02 |
| <i>ENST00000369002</i> | -1,14 | 1,07E-02 | 8,24E-02 |
| <i>S77878</i>          | 1,14  | 1,07E-02 | 8,24E-02 |
| <i>LOC339524</i>       | -1,11 | 1,07E-02 | 8,24E-02 |
| <i>BX102251</i>        | 1,10  | 1,07E-02 | 8,24E-02 |
| <i>ENST00000341262</i> | -1,19 | 1,07E-02 | 8,24E-02 |
| <i>SLC22A10</i>        | 1,08  | 1,07E-02 | 8,24E-02 |
| <i>TUBB8</i>           | 1,25  | 1,07E-02 | 8,25E-02 |
| <i>LOC389517</i>       | -1,12 | 1,07E-02 | 8,25E-02 |
| <i>BU561469</i>        | 1,22  | 1,07E-02 | 8,25E-02 |
| <i>SNTG2</i>           | 1,27  | 1,07E-02 | 8,26E-02 |
| <i>A_32_P160615</i>    | -1,26 | 1,07E-02 | 8,27E-02 |
| <i>PHLDA2</i>          | 1,42  | 1,07E-02 | 8,27E-02 |
| <i>THC2399061</i>      | -1,14 | 1,07E-02 | 8,27E-02 |
| <i>C21orf74</i>        | 1,09  | 1,08E-02 | 8,27E-02 |
| <i>A_24_P923439</i>    | 1,10  | 1,08E-02 | 8,27E-02 |
| <i>ARL4C</i>           | 1,34  | 1,08E-02 | 8,27E-02 |
| <i>SULF1</i>           | 1,37  | 1,07E-02 | 8,27E-02 |
| <i>SLC4A5</i>          | -1,12 | 1,08E-02 | 8,28E-02 |
| <i>BTBD14A</i>         | 1,26  | 1,08E-02 | 8,28E-02 |
| <i>PRMT3</i>           | -1,10 | 1,08E-02 | 8,28E-02 |
| <i>CR748243</i>        | -1,08 | 1,08E-02 | 8,29E-02 |
| <i>AF086139</i>        | 1,11  | 1,08E-02 | 8,29E-02 |
| <i>ANKRD13A</i>        | 1,14  | 1,08E-02 | 8,29E-02 |

|                        |       |          |          |
|------------------------|-------|----------|----------|
| <i>CR622586</i>        | -1,13 | 1,08E-02 | 8,29E-02 |
| <i>A_32_P23872</i>     | 1,12  | 1,08E-02 | 8,30E-02 |
| <i>AA233733</i>        | 1,18  | 1,08E-02 | 8,31E-02 |
| <i>A_32_P139311</i>    | -1,19 | 1,08E-02 | 8,31E-02 |
| <i>A_32_P147603</i>    | -1,12 | 1,08E-02 | 8,31E-02 |
| <i>THC2372489</i>      | -1,12 | 1,08E-02 | 8,31E-02 |
| <i>POLDIP3</i>         | -1,11 | 1,08E-02 | 8,31E-02 |
| <i>ENST00000374651</i> | -1,10 | 1,08E-02 | 8,31E-02 |
| <i>THC2278570</i>      | 1,13  | 1,08E-02 | 8,31E-02 |
| <i>THRAP3</i>          | 1,12  | 1,09E-02 | 8,31E-02 |
| <i>AK095707</i>        | -1,16 | 1,09E-02 | 8,32E-02 |
| <i>FAM63B</i>          | 1,13  | 1,09E-02 | 8,32E-02 |
| <i>KNTC1</i>           | -1,09 | 1,09E-02 | 8,32E-02 |
| <i>ISG20L2</i>         | 1,11  | 1,09E-02 | 8,33E-02 |
| <i>ORMDL1</i>          | -1,11 | 1,09E-02 | 8,34E-02 |
| <i>AA534817</i>        | 1,17  | 1,09E-02 | 8,34E-02 |
| <i>AK057518</i>        | -1,14 | 1,09E-02 | 8,34E-02 |
| <i>RAD51</i>           | -1,11 | 1,09E-02 | 8,35E-02 |
| <i>KHSRP</i>           | -1,09 | 1,09E-02 | 8,35E-02 |
| <i>HIST1H2AA</i>       | 1,12  | 1,09E-02 | 8,35E-02 |
| <i>AF116626</i>        | 1,17  | 1,09E-02 | 8,35E-02 |
| <i>THC2392085</i>      | -1,12 | 1,09E-02 | 8,36E-02 |
| <i>ENST00000354771</i> | -1,11 | 1,10E-02 | 8,39E-02 |
| <i>THC2281539</i>      | -1,11 | 1,10E-02 | 8,41E-02 |
| <i>ZNF157</i>          | 1,22  | 1,10E-02 | 8,41E-02 |
| <i>THC2398771</i>      | 1,12  | 1,10E-02 | 8,41E-02 |
| <i>FLJ35024</i>        | -1,17 | 1,10E-02 | 8,41E-02 |
| <i>CCNG2</i>           | -1,20 | 1,10E-02 | 8,42E-02 |
| <i>PRPF4B</i>          | -1,10 | 1,11E-02 | 8,42E-02 |
| <i>DERA</i>            | 1,09  | 1,11E-02 | 8,42E-02 |
| <i>FLJ31818</i>        | 1,13  | 1,11E-02 | 8,42E-02 |
| <i>CAMTA1</i>          | 1,14  | 1,11E-02 | 8,42E-02 |
| <i>ZW10</i>            | -1,09 | 1,11E-02 | 8,43E-02 |
| <i>CMTM6</i>           | 1,10  | 1,11E-02 | 8,44E-02 |
| <i>ORC3L</i>           | -1,09 | 1,11E-02 | 8,45E-02 |
| <i>SRRM2</i>           | -1,09 | 1,11E-02 | 8,45E-02 |
| <i>LOC646644</i>       | 1,09  | 1,11E-02 | 8,45E-02 |
| <i>SYTL4</i>           | -1,28 | 1,11E-02 | 8,46E-02 |
| <i>NCR1</i>            | -1,14 | 1,11E-02 | 8,46E-02 |
| <i>MRPS18B</i>         | -1,10 | 1,11E-02 | 8,46E-02 |
| <i>NDRG3</i>           | -1,09 | 1,11E-02 | 8,46E-02 |
| <i>PANK3</i>           | 1,12  | 1,11E-02 | 8,46E-02 |
| <i>PAG1</i>            | 1,19  | 1,11E-02 | 8,46E-02 |
| <i>TMOD3</i>           | 1,22  | 1,11E-02 | 8,46E-02 |

|                        |       |          |          |
|------------------------|-------|----------|----------|
| <i>ATP8A2</i>          | 1,22  | 1,11E-02 | 8,46E-02 |
| <i>THBS1</i>           | 1,61  | 1,11E-02 | 8,46E-02 |
| <i>BG618474</i>        | -1,30 | 1,12E-02 | 8,49E-02 |
| <i>AY358101</i>        | -1,11 | 1,12E-02 | 8,49E-02 |
| <i>C8orf58</i>         | -1,10 | 1,12E-02 | 8,49E-02 |
| <i>OXCT2</i>           | 1,19  | 1,12E-02 | 8,49E-02 |
| <i>THC2405710</i>      | -1,19 | 1,12E-02 | 8,49E-02 |
| <i>SLC4A7</i>          | 1,18  | 1,12E-02 | 8,49E-02 |
| <i>THC2281336</i>      | -1,18 | 1,12E-02 | 8,50E-02 |
| <i>MGEA5</i>           | -1,13 | 1,12E-02 | 8,50E-02 |
| <i>FGFR10P2</i>        | 1,11  | 1,12E-02 | 8,50E-02 |
| <i>S72479</i>          | 1,12  | 1,12E-02 | 8,50E-02 |
| <i>RKHD2</i>           | 1,18  | 1,12E-02 | 8,50E-02 |
| <i>BX538057</i>        | 1,19  | 1,12E-02 | 8,50E-02 |
| <i>SIGLEC8</i>         | -1,16 | 1,12E-02 | 8,50E-02 |
| <i>MOBK1B</i>          | 1,16  | 1,12E-02 | 8,50E-02 |
| <i>BM983766</i>        | -1,18 | 1,13E-02 | 8,52E-02 |
| <i>RAI17</i>           | -1,19 | 1,13E-02 | 8,53E-02 |
| <i>A_24_P407742</i>    | -1,09 | 1,13E-02 | 8,53E-02 |
| <i>TBX3</i>            | 1,23  | 1,13E-02 | 8,53E-02 |
| <i>CRKL</i>            | -1,09 | 1,13E-02 | 8,55E-02 |
| <i>A_24_P922465</i>    | -1,15 | 1,13E-02 | 8,55E-02 |
| <i>THC2315024</i>      | -1,22 | 1,13E-02 | 8,55E-02 |
| <i>THC2309604</i>      | -1,22 | 1,13E-02 | 8,55E-02 |
| <i>THC2376568</i>      | -1,15 | 1,13E-02 | 8,55E-02 |
| <i>ANKRD10</i>         | -1,10 | 1,13E-02 | 8,55E-02 |
| <i>PYCR2</i>           | -1,09 | 1,13E-02 | 8,55E-02 |
| <i>ZNF354C</i>         | -1,09 | 1,13E-02 | 8,55E-02 |
| <i>YBX1</i>            | 1,09  | 1,13E-02 | 8,55E-02 |
| <i>SIGLEC11</i>        | -1,21 | 1,13E-02 | 8,56E-02 |
| <i>UBPH</i>            | -1,13 | 1,14E-02 | 8,56E-02 |
| <i>AFG3L2</i>          | 1,11  | 1,13E-02 | 8,56E-02 |
| <i>ENST00000379938</i> | -1,09 | 1,14E-02 | 8,56E-02 |
| <i>FRY</i>             | 1,20  | 1,14E-02 | 8,57E-02 |
| <i>SSBP2</i>           | 1,12  | 1,14E-02 | 8,59E-02 |
| <i>AK094156</i>        | -1,20 | 1,14E-02 | 8,59E-02 |
| <i>THC2314123</i>      | 1,11  | 1,14E-02 | 8,59E-02 |
| <i>TOB1</i>            | 1,22  | 1,14E-02 | 8,59E-02 |
| <i>SPANXB2</i>         | 1,10  | 1,14E-02 | 8,59E-02 |
| <i>H1FOO</i>           | -1,08 | 1,14E-02 | 8,60E-02 |
| <i>CRAMP1L</i>         | -1,13 | 1,15E-02 | 8,62E-02 |
| <i>THC2342754</i>      | -1,35 | 1,15E-02 | 8,62E-02 |
| <i>T</i>               | 1,10  | 1,15E-02 | 8,62E-02 |
| <i>ASB9</i>            | 1,19  | 1,15E-02 | 8,62E-02 |

|                        |       |          |          |
|------------------------|-------|----------|----------|
| <i>CDKAL1</i>          | 1,14  | 1,15E-02 | 8,64E-02 |
| <i>CIRBP</i>           | -1,15 | 1,15E-02 | 8,64E-02 |
| <i>APP</i>             | 1,22  | 1,15E-02 | 8,64E-02 |
| <i>GAP43</i>           | 1,26  | 1,15E-02 | 8,64E-02 |
| <i>ZNF232</i>          | -1,22 | 1,15E-02 | 8,65E-02 |
| <i>SUPT16H</i>         | 1,15  | 1,15E-02 | 8,65E-02 |
| <i>TRPV2</i>           | 1,16  | 1,15E-02 | 8,65E-02 |
| <i>SIGLEC7</i>         | -1,14 | 1,15E-02 | 8,66E-02 |
| <i>KIAA1505</i>        | -1,19 | 1,16E-02 | 8,66E-02 |
| <i>AI827481</i>        | -1,16 | 1,16E-02 | 8,66E-02 |
| <i>GABPB2</i>          | -1,10 | 1,16E-02 | 8,66E-02 |
| <i>LGALS8</i>          | 1,11  | 1,15E-02 | 8,66E-02 |
| <i>NCK2</i>            | 1,14  | 1,16E-02 | 8,66E-02 |
| <i>BC000986</i>        | -1,15 | 1,16E-02 | 8,66E-02 |
| <i>C9orf32</i>         | 1,11  | 1,16E-02 | 8,66E-02 |
| <i>DNAJA4</i>          | 1,15  | 1,16E-02 | 8,66E-02 |
| <i>THC2273687</i>      | -1,11 | 1,16E-02 | 8,66E-02 |
| <i>ZCCHC11</i>         | -1,12 | 1,16E-02 | 8,66E-02 |
| <i>UNQ755</i>          | -1,09 | 1,16E-02 | 8,66E-02 |
| <i>C5AR1</i>           | 1,20  | 1,16E-02 | 8,66E-02 |
| <i>AV661884</i>        | -1,19 | 1,16E-02 | 8,67E-02 |
| <i>ZNF493</i>          | -1,17 | 1,16E-02 | 8,67E-02 |
| <i>ENST00000265297</i> | -1,14 | 1,16E-02 | 8,67E-02 |
| <i>ENST00000355232</i> | -1,15 | 1,16E-02 | 8,67E-02 |
| <i>CX3CR1</i>          | -1,30 | 1,16E-02 | 8,67E-02 |
| <i>FAHD1</i>           | -1,12 | 1,16E-02 | 8,67E-02 |
| <i>KIAA0446</i>        | 1,23  | 1,16E-02 | 8,67E-02 |
| <i>ATXN3</i>           | 1,08  | 1,16E-02 | 8,67E-02 |
| <i>PSRC2</i>           | -1,09 | 1,16E-02 | 8,68E-02 |
| <i>RNF34</i>           | -1,10 | 1,16E-02 | 8,69E-02 |
| <i>LOC157740</i>       | 1,10  | 1,16E-02 | 8,69E-02 |
| <i>TRIM56</i>          | -1,12 | 1,17E-02 | 8,71E-02 |
| <i>THC2380931</i>      | 1,11  | 1,17E-02 | 8,71E-02 |
| <i>PTK7</i>            | -1,18 | 1,17E-02 | 8,72E-02 |
| <i>THC2399152</i>      | 1,09  | 1,17E-02 | 8,73E-02 |
| <i>WDR73</i>           | -1,10 | 1,17E-02 | 8,73E-02 |
| <i>FBXW4</i>           | 1,13  | 1,17E-02 | 8,74E-02 |
| <i>A_32_P157622</i>    | -1,15 | 1,17E-02 | 8,74E-02 |
| <i>BC065520</i>        | -1,12 | 1,17E-02 | 8,74E-02 |
| <i>ZIC1</i>            | 1,08  | 1,17E-02 | 8,74E-02 |
| <i>THC2338887</i>      | -1,16 | 1,18E-02 | 8,74E-02 |
| <i>ENST00000301831</i> | 1,40  | 1,18E-02 | 8,74E-02 |
| <i>KIAA0776</i>        | -1,12 | 1,18E-02 | 8,75E-02 |
| <i>ZNF44</i>           | -1,09 | 1,18E-02 | 8,75E-02 |



|                        |       |          |          |
|------------------------|-------|----------|----------|
| <i>LEFTY1</i>          | -1,11 | 1,18E-02 | 8,75E-02 |
| <i>BTAF1</i>           | -1,19 | 1,18E-02 | 8,76E-02 |
| <i>LOC129285</i>       | -1,13 | 1,18E-02 | 8,76E-02 |
| <i>USP51</i>           | -1,13 | 1,18E-02 | 8,76E-02 |
| <i>BX647358</i>        | -1,12 | 1,18E-02 | 8,76E-02 |
| <i>A_24_P417996</i>    | 1,08  | 1,18E-02 | 8,76E-02 |
| <i>EPAS1</i>           | 1,23  | 1,18E-02 | 8,76E-02 |
| <i>GFRA3</i>           | 1,30  | 1,18E-02 | 8,76E-02 |
| <i>WDR4</i>            | -1,12 | 1,18E-02 | 8,77E-02 |
| <i>BC034002</i>        | 1,15  | 1,18E-02 | 8,77E-02 |
| <i>ENST00000301807</i> | -1,13 | 1,18E-02 | 8,77E-02 |
| <i>CLDND2</i>          | -1,16 | 1,18E-02 | 8,78E-02 |
| <i>FBXL16</i>          | -1,26 | 1,19E-02 | 8,78E-02 |
| <i>THC2431161</i>      | -1,10 | 1,19E-02 | 8,80E-02 |
| <i>ACAD8</i>           | -1,09 | 1,19E-02 | 8,80E-02 |
| <i>SCAND1</i>          | 1,09  | 1,19E-02 | 8,80E-02 |
| <i>AK125591</i>        | -1,30 | 1,19E-02 | 8,80E-02 |
| <i>EPX</i>             | -1,12 | 1,19E-02 | 8,80E-02 |
| <i>AK091784</i>        | -1,18 | 1,19E-02 | 8,81E-02 |
| <i>AK124778</i>        | 1,08  | 1,19E-02 | 8,81E-02 |
| <i>AGRIN</i>           | 1,16  | 1,19E-02 | 8,81E-02 |
| <i>BC022830</i>        | -1,17 | 1,19E-02 | 8,81E-02 |
| <i>COL4A6</i>          | -1,31 | 1,19E-02 | 8,81E-02 |
| <i>MAPK14</i>          | -1,10 | 1,19E-02 | 8,81E-02 |
| <i>PSMA7</i>           | 1,09  | 1,19E-02 | 8,81E-02 |
| <i>THC2383995</i>      | 1,07  | 1,19E-02 | 8,82E-02 |
| <i>AK097452</i>        | -1,08 | 1,19E-02 | 8,82E-02 |
| <i>TNFSF9</i>          | 1,29  | 1,19E-02 | 8,82E-02 |
| <i>ELN</i>             | 1,27  | 1,19E-02 | 8,82E-02 |
| <i>AL137318</i>        | -1,13 | 1,20E-02 | 8,82E-02 |
| <i>PDE1A</i>           | 1,18  | 1,20E-02 | 8,82E-02 |
| <i>EDIL3</i>           | 1,49  | 1,20E-02 | 8,82E-02 |
| <i>TRIM14</i>          | -1,12 | 1,20E-02 | 8,82E-02 |
| <i>TSGA10</i>          | -1,11 | 1,20E-02 | 8,82E-02 |
| <i>ENST00000371534</i> | -1,11 | 1,20E-02 | 8,82E-02 |
| <i>CCBP2</i>           | 1,08  | 1,20E-02 | 8,82E-02 |
| <i>ZNF588</i>          | -1,13 | 1,20E-02 | 8,84E-02 |
| <i>CCDC3</i>           | 1,28  | 1,20E-02 | 8,84E-02 |
| <i>TNIP2</i>           | 1,12  | 1,20E-02 | 8,84E-02 |
| <i>ENST00000361453</i> | 1,14  | 1,20E-02 | 8,84E-02 |
| <i>ERRFI1</i>          | 1,41  | 1,20E-02 | 8,84E-02 |
| <i>COTL1</i>           | -1,23 | 1,20E-02 | 8,84E-02 |
| <i>THC2341505</i>      | 1,65  | 1,20E-02 | 8,84E-02 |
| <i>KLHDC7B</i>         | -1,13 | 1,20E-02 | 8,84E-02 |

|                        |       |          |          |
|------------------------|-------|----------|----------|
| <i>TFEB</i>            | 1,11  | 1,20E-02 | 8,84E-02 |
| <i>LOC388237</i>       | -1,13 | 1,20E-02 | 8,84E-02 |
| <i>ENST00000333546</i> | -1,15 | 1,21E-02 | 8,86E-02 |
| <i>MTF1</i>            | 1,09  | 1,21E-02 | 8,87E-02 |
| <i>CLK2</i>            | -1,12 | 1,21E-02 | 8,88E-02 |
| <i>ENST00000265341</i> | -1,17 | 1,21E-02 | 8,88E-02 |
| <i>S72478</i>          | 1,15  | 1,21E-02 | 8,89E-02 |
| <i>INTS4</i>           | -1,09 | 1,21E-02 | 8,89E-02 |
| <i>BF338081</i>        | 1,11  | 1,21E-02 | 8,90E-02 |
| <i>FLJ11184</i>        | -1,13 | 1,21E-02 | 8,90E-02 |
| <i>PSG1</i>            | 1,10  | 1,21E-02 | 8,90E-02 |
| <i>CHN1</i>            | 1,21  | 1,22E-02 | 8,92E-02 |
| <i>C1orf54</i>         | 1,15  | 1,22E-02 | 8,92E-02 |
| <i>SUHW3</i>           | -1,15 | 1,22E-02 | 8,92E-02 |
| <i>THC2457445</i>      | 1,10  | 1,22E-02 | 8,92E-02 |
| <i>ENST00000331195</i> | -1,76 | 1,22E-02 | 8,92E-02 |
| <i>ZC3H5</i>           | -1,10 | 1,22E-02 | 8,92E-02 |
| <i>LZTS1</i>           | 1,33  | 1,22E-02 | 8,92E-02 |
| <i>THC2420676</i>      | -1,27 | 1,22E-02 | 8,93E-02 |
| <i>OR5P3</i>           | -1,08 | 1,22E-02 | 8,94E-02 |
| <i>PSCD3</i>           | 1,18  | 1,22E-02 | 8,94E-02 |
| <i>MST101</i>          | -1,14 | 1,22E-02 | 8,95E-02 |
| <i>ZNF702</i>          | -1,11 | 1,22E-02 | 8,95E-02 |
| <i>RNF2</i>            | -1,08 | 1,22E-02 | 8,95E-02 |
| <i>GRK5</i>            | 1,17  | 1,22E-02 | 8,95E-02 |
| <i>A_23_P252892</i>    | 1,20  | 1,22E-02 | 8,95E-02 |
| <i>PNKP</i>            | 1,09  | 1,23E-02 | 8,96E-02 |
| <i>MGC52282</i>        | -1,17 | 1,23E-02 | 8,96E-02 |
| <i>LOC440352</i>       | -1,13 | 1,23E-02 | 8,96E-02 |
| <i>BC028174</i>        | -1,12 | 1,23E-02 | 8,96E-02 |
| <i>TRIM2</i>           | -1,08 | 1,23E-02 | 8,96E-02 |
| <i>ENST00000367942</i> | 1,15  | 1,23E-02 | 8,96E-02 |
| <i>ENST00000373093</i> | 1,35  | 1,23E-02 | 8,96E-02 |
| <i>BE614051</i>        | -1,13 | 1,23E-02 | 8,96E-02 |
| <i>NR1H2</i>           | 1,12  | 1,23E-02 | 8,97E-02 |
| <i>A_24_P75994</i>     | 1,16  | 1,23E-02 | 8,97E-02 |
| <i>RHOA</i>            | 1,36  | 1,23E-02 | 8,97E-02 |
| <i>ELOVL5</i>          | 1,12  | 1,23E-02 | 8,98E-02 |
| <i>MAF</i>             | -1,16 | 1,23E-02 | 8,98E-02 |
| <i>SIP1</i>            | -1,13 | 1,23E-02 | 8,98E-02 |
| <i>ARTN</i>            | 1,11  | 1,23E-02 | 8,98E-02 |
| <i>PRDM1</i>           | 1,38  | 1,23E-02 | 8,99E-02 |
| <i>A_32_P174385</i>    | 1,11  | 1,23E-02 | 8,99E-02 |
| <i>TSEN2</i>           | -1,17 | 1,24E-02 | 8,99E-02 |

|                    |       |          |          |
|--------------------|-------|----------|----------|
| <i>CISH</i>        | 1,28  | 1,24E-02 | 8,99E-02 |
| <i>AEBP2</i>       | 1,10  | 1,24E-02 | 9,00E-02 |
| <i>MLKL</i>        | 1,19  | 1,24E-02 | 9,00E-02 |
| <i>AK001808</i>    | -1,26 | 1,24E-02 | 9,00E-02 |
| <i>FUT4</i>        | -1,09 | 1,24E-02 | 9,00E-02 |
| <i>ZNF137</i>      | -1,10 | 1,24E-02 | 9,00E-02 |
| <i>GALR2</i>       | 1,11  | 1,24E-02 | 9,00E-02 |
| <i>GLT8D1</i>      | -1,15 | 1,24E-02 | 9,01E-02 |
| <i>RFC5</i>        | -1,08 | 1,24E-02 | 9,01E-02 |
| <i>NUP205</i>      | -1,08 | 1,24E-02 | 9,01E-02 |
| <i>BRMS1</i>       | 1,10  | 1,24E-02 | 9,01E-02 |
| <i>GOLGA8A</i>     | -1,15 | 1,24E-02 | 9,02E-02 |
| <i>AL109696</i>    | 1,46  | 1,24E-02 | 9,02E-02 |
| <i>CN479126</i>    | 1,16  | 1,24E-02 | 9,03E-02 |
| <i>MAGEF1</i>      | -1,15 | 1,25E-02 | 9,04E-02 |
| <i>PLXNA3</i>      | 1,08  | 1,25E-02 | 9,04E-02 |
| <i>YRDC</i>        | 1,15  | 1,25E-02 | 9,05E-02 |
| <i>PITPNM1</i>     | 1,14  | 1,25E-02 | 9,06E-02 |
| <i>KIDINS220</i>   | -1,08 | 1,25E-02 | 9,06E-02 |
| <i>THC2280075</i>  | 1,10  | 1,25E-02 | 9,06E-02 |
| <i>C21orf59</i>    | 1,09  | 1,25E-02 | 9,06E-02 |
| <i>SCAMP5</i>      | -1,15 | 1,25E-02 | 9,07E-02 |
| <i>THC2309459</i>  | -1,11 | 1,25E-02 | 9,07E-02 |
| <i>OXTR</i>        | 1,22  | 1,25E-02 | 9,07E-02 |
| <i>ZNF179</i>      | 1,28  | 1,25E-02 | 9,07E-02 |
| <i>PSMAL</i>       | -1,24 | 1,25E-02 | 9,07E-02 |
| <i>MGC24381</i>    | 1,09  | 1,25E-02 | 9,08E-02 |
| <i>FLJ20920</i>    | -1,15 | 1,26E-02 | 9,08E-02 |
| <i>C20orf3</i>     | -1,08 | 1,26E-02 | 9,09E-02 |
| <i>AMDD</i>        | -1,18 | 1,26E-02 | 9,10E-02 |
| <i>THC2378504</i>  | -1,16 | 1,26E-02 | 9,10E-02 |
| <i>BC063503</i>    | -1,16 | 1,26E-02 | 9,10E-02 |
| <i>ANKRD21</i>     | -1,10 | 1,26E-02 | 9,10E-02 |
| <i>AF085871</i>    | 1,38  | 1,26E-02 | 9,10E-02 |
| <i>A_24_P49860</i> | -1,15 | 1,26E-02 | 9,10E-02 |
| <i>HDDC3</i>       | -1,10 | 1,26E-02 | 9,11E-02 |
| <i>C6orf173</i>    | -1,35 | 1,26E-02 | 9,11E-02 |
| <i>T05215</i>      | -1,20 | 1,26E-02 | 9,11E-02 |
| <i>C1orf204</i>    | -1,11 | 1,26E-02 | 9,11E-02 |
| <i>RBM34</i>       | 1,09  | 1,26E-02 | 9,11E-02 |
| <i>GUCY1A3</i>     | 1,34  | 1,26E-02 | 9,11E-02 |
| <i>A_32_P68205</i> | 1,19  | 1,26E-02 | 9,11E-02 |
| <i>XIST</i>        | -1,11 | 1,26E-02 | 9,12E-02 |
| <i>POLR2B</i>      | -1,10 | 1,27E-02 | 9,12E-02 |

|                        |       |          |          |
|------------------------|-------|----------|----------|
| <i>THC2303047</i>      | -1,70 | 1,27E-02 | 9,12E-02 |
| <i>THC2431726</i>      | -1,28 | 1,27E-02 | 9,12E-02 |
| <i>AK001007</i>        | -1,20 | 1,27E-02 | 9,12E-02 |
| <i>LOC653374</i>       | -1,19 | 1,27E-02 | 9,12E-02 |
| <i>THC2352617</i>      | -1,17 | 1,27E-02 | 9,12E-02 |
| <i>CR620532</i>        | -1,16 | 1,27E-02 | 9,12E-02 |
| <i>LMAN2L</i>          | -1,13 | 1,27E-02 | 9,12E-02 |
| <i>APOBEC3G</i>        | -1,12 | 1,27E-02 | 9,12E-02 |
| <i>PPWD1</i>           | -1,12 | 1,27E-02 | 9,12E-02 |
| <i>LOC148413</i>       | -1,11 | 1,27E-02 | 9,12E-02 |
| <i>AK021745</i>        | -1,10 | 1,27E-02 | 9,12E-02 |
| <i>RBED1</i>           | -1,09 | 1,27E-02 | 9,12E-02 |
| <i>A_24_P483374</i>    | 1,09  | 1,27E-02 | 9,12E-02 |
| <i>GRK6</i>            | 1,11  | 1,27E-02 | 9,12E-02 |
| <i>ENST00000269720</i> | 1,14  | 1,27E-02 | 9,12E-02 |
| <i>FLJ22028</i>        | 1,16  | 1,27E-02 | 9,12E-02 |
| <i>UNC13B</i>          | 1,18  | 1,27E-02 | 9,12E-02 |
| <i>BCOR</i>            | 1,18  | 1,27E-02 | 9,12E-02 |
| <i>AK3L1</i>           | 1,23  | 1,27E-02 | 9,12E-02 |
| <i>JUNB</i>            | 2,05  | 1,27E-02 | 9,12E-02 |
| <i>UNC50</i>           | -1,13 | 1,27E-02 | 9,12E-02 |
| <i>ERVWE1</i>          | -1,06 | 1,27E-02 | 9,12E-02 |
| <i>TNFRSF17</i>        | -1,27 | 1,27E-02 | 9,12E-02 |
| <i>ENST00000382611</i> | 1,29  | 1,27E-02 | 9,12E-02 |
| <i>ZNF430</i>          | -1,17 | 1,27E-02 | 9,13E-02 |
| <i>DCP1B</i>           | -1,15 | 1,27E-02 | 9,13E-02 |
| <i>CBX5</i>            | 1,15  | 1,27E-02 | 9,13E-02 |
| <i>TMEM35</i>          | 1,48  | 1,28E-02 | 9,13E-02 |
| <i>THC2290974</i>      | -1,12 | 1,28E-02 | 9,13E-02 |
| <i>PIK3R3</i>          | 1,27  | 1,28E-02 | 9,13E-02 |
| <i>ENY2</i>            | 1,11  | 1,28E-02 | 9,14E-02 |
| <i>ACTL6A</i>          | -1,09 | 1,28E-02 | 9,14E-02 |
| <i>ECM1</i>            | 1,26  | 1,28E-02 | 9,15E-02 |
| <i>RKHD3</i>           | -1,24 | 1,28E-02 | 9,15E-02 |
| <i>A_24_P118361</i>    | -1,16 | 1,28E-02 | 9,15E-02 |
| <i>ENST00000368564</i> | -1,15 | 1,28E-02 | 9,15E-02 |
| <i>MGC5139</i>         | -1,14 | 1,28E-02 | 9,15E-02 |
| <i>THC2411876</i>      | -1,12 | 1,28E-02 | 9,15E-02 |
| <i>ZNF77</i>           | -1,12 | 1,28E-02 | 9,15E-02 |
| <i>COG6</i>            | -1,11 | 1,28E-02 | 9,15E-02 |
| <i>POLI</i>            | -1,11 | 1,28E-02 | 9,15E-02 |
| <i>C6orf75</i>         | -1,11 | 1,28E-02 | 9,15E-02 |
| <i>BQ632351</i>        | 1,09  | 1,28E-02 | 9,15E-02 |
| <i>C4orf16</i>         | 1,13  | 1,28E-02 | 9,15E-02 |

|                        |       |          |          |
|------------------------|-------|----------|----------|
| <i>PELI1</i>           | 1,19  | 1,28E-02 | 9,15E-02 |
| <i>SYNC1</i>           | 1,25  | 1,28E-02 | 9,15E-02 |
| <i>C5orf24</i>         | 1,13  | 1,28E-02 | 9,15E-02 |
| <i>CD46</i>            | 1,23  | 1,28E-02 | 9,16E-02 |
| <i>AV692191</i>        | -1,13 | 1,29E-02 | 9,17E-02 |
| <i>CELSR3</i>          | 1,10  | 1,29E-02 | 9,17E-02 |
| <i>UPF1</i>            | -1,12 | 1,29E-02 | 9,17E-02 |
| <i>A_24_P931583</i>    | 1,17  | 1,29E-02 | 9,17E-02 |
| <i>THC2439806</i>      | -1,19 | 1,29E-02 | 9,17E-02 |
| <i>FDX1</i>            | 1,11  | 1,29E-02 | 9,19E-02 |
| <i>SURF6</i>           | -1,09 | 1,29E-02 | 9,19E-02 |
| <i>PER2</i>            | 1,36  | 1,29E-02 | 9,19E-02 |
| <i>A_32_P111919</i>    | -1,10 | 1,29E-02 | 9,20E-02 |
| <i>CA312250</i>        | -1,17 | 1,30E-02 | 9,21E-02 |
| <i>ENST00000339968</i> | 1,12  | 1,30E-02 | 9,21E-02 |
| <i>CD274</i>           | 1,19  | 1,30E-02 | 9,22E-02 |
| <i>ZNF496</i>          | 1,08  | 1,30E-02 | 9,22E-02 |
| <i>C16orf58</i>        | -1,10 | 1,30E-02 | 9,22E-02 |
| <i>A_24_P924329</i>    | -1,12 | 1,30E-02 | 9,23E-02 |
| <i>THC2406182</i>      | -1,10 | 1,30E-02 | 9,23E-02 |
| <i>TIGD7</i>           | -1,10 | 1,30E-02 | 9,23E-02 |
| <i>TCF21</i>           | 1,32  | 1,30E-02 | 9,23E-02 |
| <i>AK024921</i>        | -1,14 | 1,30E-02 | 9,23E-02 |
| <i>AL122040</i>        | -1,10 | 1,30E-02 | 9,23E-02 |
| <i>DARC</i>            | 1,28  | 1,30E-02 | 9,23E-02 |
| <i>CACNB4</i>          | -1,14 | 1,30E-02 | 9,24E-02 |
| <i>CD2</i>             | -1,38 | 1,30E-02 | 9,24E-02 |
| <i>IFNA5</i>           | 1,11  | 1,30E-02 | 9,24E-02 |
| <i>AATK</i>            | 1,35  | 1,30E-02 | 9,24E-02 |
| <i>AK098081</i>        | -1,15 | 1,30E-02 | 9,24E-02 |
| <i>CXorf50</i>         | -1,19 | 1,31E-02 | 9,24E-02 |
| <i>DNASE1L2</i>        | -1,12 | 1,30E-02 | 9,24E-02 |
| <i>MFHAS1</i>          | 1,13  | 1,31E-02 | 9,25E-02 |
| <i>TMEM80</i>          | -1,19 | 1,31E-02 | 9,25E-02 |
| <i>TICAM2</i>          | 1,12  | 1,31E-02 | 9,25E-02 |
| <i>SCUBE3</i>          | 1,17  | 1,31E-02 | 9,25E-02 |
| <i>EEF1A2</i>          | 1,23  | 1,31E-02 | 9,25E-02 |
| <i>THC2325431</i>      | 1,15  | 1,31E-02 | 9,25E-02 |
| <i>PLEKHB1</i>         | 1,09  | 1,31E-02 | 9,26E-02 |
| <i>AK093869</i>        | -1,19 | 1,31E-02 | 9,26E-02 |
| <i>BC017904</i>        | -1,08 | 1,31E-02 | 9,26E-02 |
| <i>SOX17</i>           | 1,40  | 1,31E-02 | 9,26E-02 |
| <i>ENST00000361989</i> | 1,09  | 1,31E-02 | 9,28E-02 |
| <i>ARHGEF15</i>        | 1,12  | 1,31E-02 | 9,28E-02 |

|                        |       |          |          |
|------------------------|-------|----------|----------|
| <i>STK36</i>           | -1,09 | 1,31E-02 | 9,28E-02 |
| <i>THC2322759</i>      | -1,08 | 1,31E-02 | 9,28E-02 |
| <i>A_24_P530977</i>    | 1,11  | 1,31E-02 | 9,28E-02 |
| <i>AMPD1</i>           | -1,33 | 1,32E-02 | 9,29E-02 |
| <i>A_24_P936298</i>    | 1,11  | 1,32E-02 | 9,30E-02 |
| <i>RAB2B</i>           | 1,12  | 1,32E-02 | 9,31E-02 |
| <i>LOC647022</i>       | -1,19 | 1,32E-02 | 9,31E-02 |
| <i>KLRD1</i>           | -1,16 | 1,32E-02 | 9,31E-02 |
| <i>PYGO2</i>           | -1,11 | 1,32E-02 | 9,31E-02 |
| <i>CD614215</i>        | 1,13  | 1,32E-02 | 9,31E-02 |
| <i>PLIN</i>            | -1,21 | 1,32E-02 | 9,32E-02 |
| <i>ENST00000287322</i> | -1,11 | 1,32E-02 | 9,32E-02 |
| <i>KIAA1446</i>        | -1,32 | 1,32E-02 | 9,32E-02 |
| <i>THC2280227</i>      | 1,11  | 1,33E-02 | 9,34E-02 |
| <i>ABO62480</i>        | 1,13  | 1,33E-02 | 9,34E-02 |
| <i>SPN</i>             | -1,12 | 1,33E-02 | 9,34E-02 |
| <i>SPATA9</i>          | -1,08 | 1,33E-02 | 9,34E-02 |
| <i>A_24_P771173</i>    | 1,07  | 1,33E-02 | 9,35E-02 |
| <i>A_32_P94976</i>     | -1,14 | 1,33E-02 | 9,36E-02 |
| <i>YTHDC2</i>          | 1,11  | 1,33E-02 | 9,37E-02 |
| <i>SCARNA17</i>        | -1,28 | 1,33E-02 | 9,38E-02 |
| <i>BX419129</i>        | -1,17 | 1,33E-02 | 9,38E-02 |
| <i>THC2402058</i>      | -1,13 | 1,34E-02 | 9,38E-02 |
| <i>KRIT1</i>           | -1,08 | 1,34E-02 | 9,38E-02 |
| <i>AK021664</i>        | 1,20  | 1,33E-02 | 9,38E-02 |
| <i>JOSD1</i>           | 1,12  | 1,34E-02 | 9,38E-02 |
| <i>CDRT1</i>           | 1,09  | 1,34E-02 | 9,39E-02 |
| <i>USMG5</i>           | 1,13  | 1,34E-02 | 9,39E-02 |
| <i>BC070125</i>        | -1,38 | 1,34E-02 | 9,39E-02 |
| <i>CTSG</i>            | -1,57 | 1,34E-02 | 9,40E-02 |
| <i>CLSTN1</i>          | -1,11 | 1,34E-02 | 9,40E-02 |
| <i>A_24_P938025</i>    | -1,11 | 1,34E-02 | 9,40E-02 |
| <i>FBXO25</i>          | 1,09  | 1,34E-02 | 9,40E-02 |
| <i>H3F3B</i>           | 1,12  | 1,34E-02 | 9,40E-02 |
| <i>HOXD8</i>           | 1,24  | 1,34E-02 | 9,40E-02 |
| <i>FLT3</i>            | -1,18 | 1,34E-02 | 9,40E-02 |
| <i>SGCB</i>            | 1,10  | 1,34E-02 | 9,41E-02 |
| <i>SEC23IP</i>         | -1,11 | 1,34E-02 | 9,41E-02 |
| <i>RASL11A</i>         | 1,35  | 1,34E-02 | 9,41E-02 |
| <i>TXNL4B</i>          | -1,10 | 1,34E-02 | 9,41E-02 |
| <i>THC2341837</i>      | 1,23  | 1,35E-02 | 9,42E-02 |
| <i>A_24_P177634</i>    | 1,12  | 1,35E-02 | 9,42E-02 |
| <i>SLC1A7</i>          | -1,19 | 1,35E-02 | 9,43E-02 |
| <i>BM982349</i>        | -1,11 | 1,35E-02 | 9,43E-02 |

|                        |       |          |          |
|------------------------|-------|----------|----------|
| <i>SEPP1</i>           | -1,22 | 1,35E-02 | 9,43E-02 |
| <i>BM999256</i>        | 1,09  | 1,35E-02 | 9,43E-02 |
| <i>DAB1</i>            | 1,13  | 1,35E-02 | 9,44E-02 |
| <i>THC2375434</i>      | 1,12  | 1,35E-02 | 9,46E-02 |
| <i>A_24_P705167</i>    | 1,18  | 1,35E-02 | 9,46E-02 |
| <i>KBTBD11</i>         | -1,37 | 1,36E-02 | 9,47E-02 |
| <i>KIAA1443</i>        | -1,13 | 1,36E-02 | 9,47E-02 |
| <i>GPT2</i>            | -1,11 | 1,36E-02 | 9,47E-02 |
| <i>PDGFC</i>           | -1,18 | 1,36E-02 | 9,47E-02 |
| <i>C14orf133</i>       | -1,10 | 1,36E-02 | 9,47E-02 |
| <i>OR2T5</i>           | 1,11  | 1,36E-02 | 9,47E-02 |
| <i>A_24_P922750</i>    | -1,08 | 1,36E-02 | 9,47E-02 |
| <i>MFAP4</i>           | 1,19  | 1,36E-02 | 9,47E-02 |
| <i>MGC3207</i>         | -1,13 | 1,36E-02 | 9,48E-02 |
| <i>A_23_P14432</i>     | 1,14  | 1,36E-02 | 9,48E-02 |
| <i>LDHD</i>            | -1,16 | 1,36E-02 | 9,49E-02 |
| <i>ENST00000216649</i> | -1,53 | 1,36E-02 | 9,49E-02 |
| <i>R17697</i>          | -1,09 | 1,36E-02 | 9,49E-02 |
| <i>COX18</i>           | -1,16 | 1,36E-02 | 9,50E-02 |
| <i>MLH3</i>            | -1,15 | 1,37E-02 | 9,51E-02 |
| <i>ENST00000311040</i> | 1,13  | 1,37E-02 | 9,53E-02 |
| <i>MOSC2</i>           | 1,10  | 1,37E-02 | 9,53E-02 |
| <i>TFF1</i>            | 1,11  | 1,37E-02 | 9,54E-02 |
| <i>SNTB1</i>           | 1,18  | 1,37E-02 | 9,54E-02 |
| <i>GJA12</i>           | -1,19 | 1,37E-02 | 9,54E-02 |
| <i>A_24_P934667</i>    | -1,12 | 1,37E-02 | 9,54E-02 |
| <i>PRKG1</i>           | 1,18  | 1,37E-02 | 9,54E-02 |
| <i>PRPS1L1</i>         | 1,11  | 1,37E-02 | 9,55E-02 |
| <i>INSIG1</i>          | 1,41  | 1,37E-02 | 9,55E-02 |
| <i>C6orf96</i>         | -1,12 | 1,38E-02 | 9,55E-02 |
| <i>A_24_P927072</i>    | 1,09  | 1,38E-02 | 9,55E-02 |
| <i>ATF5</i>            | 1,19  | 1,38E-02 | 9,55E-02 |
| <i>A_24_P913847</i>    | 1,26  | 1,38E-02 | 9,55E-02 |
| <i>FLJ11286</i>        | -1,08 | 1,38E-02 | 9,56E-02 |
| <i>GIYD1</i>           | 1,12  | 1,38E-02 | 9,56E-02 |
| <i>PAOX</i>            | -1,10 | 1,38E-02 | 9,56E-02 |
| <i>GBAP</i>            | 1,11  | 1,38E-02 | 9,56E-02 |
| <i>CLN8</i>            | 1,15  | 1,38E-02 | 9,57E-02 |
| <i>KIAA0157</i>        | -1,13 | 1,38E-02 | 9,57E-02 |
| <i>IHPK3</i>           | -1,48 | 1,38E-02 | 9,58E-02 |
| <i>LOC400509</i>       | -1,09 | 1,38E-02 | 9,58E-02 |
| <i>VDP</i>             | -1,14 | 1,38E-02 | 9,58E-02 |
| <i>ATP8B4</i>          | -1,34 | 1,38E-02 | 9,58E-02 |
| <i>C15orf17</i>        | -1,13 | 1,38E-02 | 9,58E-02 |

|                        |       |          |          |
|------------------------|-------|----------|----------|
| <i>THC2268873</i>      | -1,13 | 1,39E-02 | 9,59E-02 |
| <i>SLAMF6</i>          | -1,10 | 1,38E-02 | 9,59E-02 |
| <i>ADAM9</i>           | 1,11  | 1,39E-02 | 9,59E-02 |
| <i>ZNFN1A5</i>         | -1,11 | 1,39E-02 | 9,59E-02 |
| <i>tcag7.441</i>       | 1,11  | 1,39E-02 | 9,59E-02 |
| <i>SLC8A3</i>          | -1,11 | 1,39E-02 | 9,59E-02 |
| <i>THC2315644</i>      | -1,09 | 1,39E-02 | 9,59E-02 |
| <i>MFSD7</i>           | 1,13  | 1,39E-02 | 9,61E-02 |
| <i>THC2414547</i>      | 1,10  | 1,39E-02 | 9,61E-02 |
| <i>A_24_P409420</i>    | 1,20  | 1,39E-02 | 9,61E-02 |
| <i>ITIH1</i>           | 1,27  | 1,39E-02 | 9,61E-02 |
| <i>THC2444078</i>      | -1,12 | 1,39E-02 | 9,62E-02 |
| <i>FLJ40542</i>        | -1,12 | 1,39E-02 | 9,62E-02 |
| <i>BC000206</i>        | 1,14  | 1,39E-02 | 9,62E-02 |
| <i>ENST00000371244</i> | 1,19  | 1,39E-02 | 9,62E-02 |
| <i>ENST00000321925</i> | 1,24  | 1,39E-02 | 9,62E-02 |
| <i>SLC1A1</i>          | -1,26 | 1,40E-02 | 9,62E-02 |
| <i>OPCML</i>           | -1,21 | 1,40E-02 | 9,62E-02 |
| <i>AI355706</i>        | -1,11 | 1,40E-02 | 9,63E-02 |
| <i>C21orf55</i>        | -1,11 | 1,40E-02 | 9,63E-02 |
| <i>CR618615</i>        | 1,94  | 1,40E-02 | 9,64E-02 |
| <i>DUSP16</i>          | 1,18  | 1,40E-02 | 9,65E-02 |
| <i>LRRK2</i>           | 1,18  | 1,40E-02 | 9,65E-02 |
| <i>A_23_P136961</i>    | 1,19  | 1,40E-02 | 9,65E-02 |
| <i>RP1-93H18.5</i>     | -1,26 | 1,40E-02 | 9,65E-02 |
| <i>AK096487</i>        | -1,21 | 1,40E-02 | 9,65E-02 |
| <i>MAP3K2</i>          | 1,08  | 1,40E-02 | 9,65E-02 |
| <i>OR10G8</i>          | 1,10  | 1,40E-02 | 9,65E-02 |
| <i>BC039363</i>        | 1,12  | 1,40E-02 | 9,65E-02 |
| <i>BE564275</i>        | 1,13  | 1,40E-02 | 9,66E-02 |
| <i>LOC440093</i>       | 1,12  | 1,41E-02 | 9,66E-02 |
| <i>FLJ39257</i>        | -1,15 | 1,41E-02 | 9,67E-02 |
| <i>EDC4</i>            | 1,11  | 1,41E-02 | 9,67E-02 |
| <i>CSRP2</i>           | 1,40  | 1,41E-02 | 9,67E-02 |
| <i>ACOT4</i>           | -1,20 | 1,41E-02 | 9,67E-02 |
| <i>A_23_P61068</i>     | -1,29 | 1,41E-02 | 9,69E-02 |
| <i>ITGAL</i>           | -1,15 | 1,41E-02 | 9,69E-02 |
| <i>A_24_P631993</i>    | 1,14  | 1,41E-02 | 9,70E-02 |
| <i>LOC203547</i>       | 1,11  | 1,41E-02 | 9,70E-02 |
| <i>BX102314</i>        | -1,18 | 1,41E-02 | 9,70E-02 |
| <i>THC2307981</i>      | -1,14 | 1,41E-02 | 9,70E-02 |
| <i>LY86</i>            | -1,20 | 1,42E-02 | 9,71E-02 |
| <i>PLA2G6</i>          | -1,14 | 1,42E-02 | 9,71E-02 |
| <i>ENST00000317931</i> | -1,13 | 1,42E-02 | 9,71E-02 |



|                        |       |          |          |
|------------------------|-------|----------|----------|
| <i>CR936771</i>        | -1,12 | 1,42E-02 | 9,71E-02 |
| <i>SPFH1</i>           | -1,10 | 1,42E-02 | 9,71E-02 |
| <i>THC2439435</i>      | 1,08  | 1,42E-02 | 9,71E-02 |
| <i>RIN3</i>            | 1,11  | 1,42E-02 | 9,71E-02 |
| <i>A_24_P264293</i>    | 1,28  | 1,41E-02 | 9,71E-02 |
| <i>MRC1L1</i>          | -1,26 | 1,42E-02 | 9,72E-02 |
| <i>BCL11A</i>          | -1,30 | 1,42E-02 | 9,72E-02 |
| <i>NPHS2</i>           | 1,16  | 1,42E-02 | 9,72E-02 |
| <i>BC031314</i>        | -1,16 | 1,42E-02 | 9,72E-02 |
| <i>AKAP11</i>          | -1,15 | 1,42E-02 | 9,73E-02 |
| <i>THC2455681</i>      | -1,17 | 1,42E-02 | 9,73E-02 |
| <i>LOC644846</i>       | -1,22 | 1,42E-02 | 9,74E-02 |
| <i>BCMO1</i>           | -1,10 | 1,42E-02 | 9,74E-02 |
| <i>THC2314166</i>      | 1,19  | 1,42E-02 | 9,74E-02 |
| <i>TUSC1</i>           | 1,10  | 1,43E-02 | 9,74E-02 |
| <i>LOC51233</i>        | 1,12  | 1,43E-02 | 9,75E-02 |
| <i>AK096537</i>        | -1,13 | 1,43E-02 | 9,75E-02 |
| <i>A_23_P64184</i>     | 1,32  | 1,43E-02 | 9,75E-02 |
| <i>TMEM57</i>          | 1,09  | 1,43E-02 | 9,75E-02 |
| <i>CV399637</i>        | 1,12  | 1,43E-02 | 9,77E-02 |
| <i>LUZP1</i>           | 1,08  | 1,43E-02 | 9,78E-02 |
| <i>IRF4</i>            | -1,42 | 1,43E-02 | 9,78E-02 |
| <i>CYP3A4</i>          | -1,20 | 1,43E-02 | 9,78E-02 |
| <i>MIB1</i>            | 1,11  | 1,43E-02 | 9,78E-02 |
| <i>ICAM4</i>           | 1,48  | 1,43E-02 | 9,78E-02 |
| <i>ATP1B1</i>          | -1,44 | 1,44E-02 | 9,80E-02 |
| <i>L11573</i>          | 1,11  | 1,44E-02 | 9,80E-02 |
| <i>RPP38</i>           | -1,11 | 1,44E-02 | 9,80E-02 |
| <i>A_24_P384369</i>    | 1,21  | 1,44E-02 | 9,80E-02 |
| <i>GPHN</i>            | 1,09  | 1,44E-02 | 9,80E-02 |
| <i>TNFRSF10A</i>       | 1,20  | 1,44E-02 | 9,80E-02 |
| <i>AV763625</i>        | -1,15 | 1,44E-02 | 9,83E-02 |
| <i>B3GNTL1</i>         | -1,12 | 1,44E-02 | 9,83E-02 |
| <i>THC2408506</i>      | 1,14  | 1,44E-02 | 9,83E-02 |
| <i>LRRN6C</i>          | 1,51  | 1,45E-02 | 9,84E-02 |
| <i>THC2343678</i>      | 1,36  | 1,45E-02 | 9,84E-02 |
| <i>ENST00000380739</i> | 1,19  | 1,45E-02 | 9,85E-02 |
| <i>ENST00000330947</i> | 1,10  | 1,45E-02 | 9,85E-02 |
| <i>FCGRT</i>           | -1,16 | 1,45E-02 | 9,86E-02 |
| <i>FAM27E2</i>         | -1,18 | 1,45E-02 | 9,87E-02 |
| <i>ENST00000379748</i> | -1,37 | 1,45E-02 | 9,87E-02 |
| <i>DUS3L</i>           | 1,10  | 1,45E-02 | 9,87E-02 |
| <i>BU617889</i>        | 1,10  | 1,46E-02 | 9,88E-02 |
| <i>BX419477</i>        | 1,18  | 1,46E-02 | 9,89E-02 |

|                        |       |          |          |
|------------------------|-------|----------|----------|
| <i>ALX3</i>            | -1,07 | 1,46E-02 | 9,89E-02 |
| <i>ENST00000299903</i> | -1,64 | 1,46E-02 | 9,89E-02 |
| <i>RNASE1</i>          | -1,26 | 1,46E-02 | 9,89E-02 |
| <i>GNAL</i>            | 1,12  | 1,46E-02 | 9,89E-02 |
| <i>BQ438133</i>        | -1,12 | 1,46E-02 | 9,90E-02 |
| <i>MYO15B</i>          | -1,13 | 1,46E-02 | 9,90E-02 |
| <i>THC2411515</i>      | 1,15  | 1,46E-02 | 9,90E-02 |
| <i>H2AFX</i>           | 1,18  | 1,46E-02 | 9,90E-02 |
| <i>GJA7</i>            | 1,31  | 1,46E-02 | 9,90E-02 |
| <i>SIRPG</i>           | -1,13 | 1,46E-02 | 9,92E-02 |
| <i>B4GALNT1</i>        | 1,12  | 1,46E-02 | 9,92E-02 |
| <i>BX338933</i>        | 1,25  | 1,46E-02 | 9,92E-02 |
| <i>AK092535</i>        | 1,24  | 1,47E-02 | 9,92E-02 |
| <i>THC2286151</i>      | 1,47  | 1,47E-02 | 9,93E-02 |
| <i>FNDC3A</i>          | -1,11 | 1,47E-02 | 9,93E-02 |
| <i>FGD6</i>            | 1,12  | 1,47E-02 | 9,94E-02 |
| <i>NFKB2</i>           | 1,13  | 1,47E-02 | 9,94E-02 |
| <i>ARHGEF2</i>         | 1,14  | 1,47E-02 | 9,95E-02 |
| <i>AF420438</i>        | 1,11  | 1,47E-02 | 9,96E-02 |
| <i>A_24_P600603</i>    | 1,10  | 1,47E-02 | 9,96E-02 |
| <i>AK022337</i>        | 1,17  | 1,47E-02 | 9,96E-02 |
| <i>THC2339389</i>      | -1,38 | 1,47E-02 | 9,96E-02 |
| <i>ENST00000357180</i> | -1,14 | 1,47E-02 | 9,96E-02 |
| <i>TESK2</i>           | 1,13  | 1,47E-02 | 9,96E-02 |
| <i>DKFZp434B1231</i>   | -1,27 | 1,48E-02 | 9,97E-02 |
| <i>TMEM65</i>          | 1,16  | 1,48E-02 | 9,97E-02 |
| <i>AY062331</i>        | -1,77 | 1,48E-02 | 9,98E-02 |
| <i>A_24_P268474</i>    | -1,17 | 1,48E-02 | 9,98E-02 |
| <i>AF087985</i>        | -1,11 | 1,48E-02 | 9,98E-02 |
| <i>ENST00000344771</i> | -1,09 | 1,48E-02 | 9,98E-02 |
| <i>THC2364247</i>      | 1,10  | 1,48E-02 | 9,98E-02 |
| <i>THC2266906</i>      | 1,14  | 1,48E-02 | 9,98E-02 |
| <i>THC2378933</i>      | 1,29  | 1,48E-02 | 9,98E-02 |
| <i>ENST00000382004</i> | -1,11 | 1,48E-02 | 9,98E-02 |
| <i>RAB24</i>           | -1,09 | 1,48E-02 | 9,98E-02 |
| <i>GRB10</i>           | 1,13  | 1,48E-02 | 9,98E-02 |
| <i>TRAK1</i>           | 1,13  | 1,48E-02 | 9,98E-02 |
| <i>PPP4C</i>           | 1,11  | 1,48E-02 | 9,99E-02 |
| <i>THC2343933</i>      | -1,21 | 1,48E-02 | 9,99E-02 |
| <i>TPSB2</i>           | -1,38 | 1,49E-02 | 1,00E-01 |
| <i>FLJ40852</i>        | -1,12 | 1,49E-02 | 1,00E-01 |
| <i>BM984383</i>        | -1,10 | 1,49E-02 | 1,00E-01 |
| <i>SCN8A</i>           | -1,08 | 1,49E-02 | 1,00E-01 |
| <i>C5orf25</i>         | -1,20 | 1,49E-02 | 1,00E-01 |

|                        |       |          |          |
|------------------------|-------|----------|----------|
| <i>SLC20A2</i>         | 1,18  | 1,49E-02 | 1,00E-01 |
| <i>TBC1D8B</i>         | -1,21 | 1,49E-02 | 1,00E-01 |
| <i>BM989848</i>        | -1,12 | 1,49E-02 | 1,00E-01 |
| <i>BM995732</i>        | -1,09 | 1,49E-02 | 1,00E-01 |
| <i>THC2318057</i>      | 1,16  | 1,49E-02 | 1,00E-01 |
| <i>HSPA4L</i>          | 1,17  | 1,49E-02 | 1,00E-01 |
| <i>AK095583</i>        | 1,14  | 1,50E-02 | 1,00E-01 |
| <i>ENST00000358951</i> | -1,09 | 1,50E-02 | 1,01E-01 |
| <i>UCKL1</i>           | 1,08  | 1,50E-02 | 1,01E-01 |
| <i>TMEM46</i>          | 1,13  | 1,50E-02 | 1,01E-01 |
| <i>SFRS7</i>           | 1,13  | 1,50E-02 | 1,01E-01 |
| <i>THC2340365</i>      | 1,45  | 1,50E-02 | 1,01E-01 |
| <i>PLCG1</i>           | -1,08 | 1,50E-02 | 1,01E-01 |
| <i>STS</i>             | 1,13  | 1,50E-02 | 1,01E-01 |
| <i>KIAA0774</i>        | -1,31 | 1,50E-02 | 1,01E-01 |
| <i>FLJ34306</i>        | -1,11 | 1,50E-02 | 1,01E-01 |
| <i>CDC6</i>            | -1,18 | 1,51E-02 | 1,01E-01 |
| <i>MYOT</i>            | 1,42  | 1,51E-02 | 1,01E-01 |
| <i>C20orf12</i>        | -1,07 | 1,51E-02 | 1,01E-01 |
| <i>AK074696</i>        | -1,21 | 1,51E-02 | 1,01E-01 |
| <i>KA21</i>            | -1,26 | 1,51E-02 | 1,01E-01 |
| <i>DDX20</i>           | -1,14 | 1,51E-02 | 1,01E-01 |
| <i>HS3ST3A1</i>        | 1,21  | 1,51E-02 | 1,01E-01 |
| <i>ZNF300</i>          | -1,11 | 1,51E-02 | 1,01E-01 |
| <i>BX648831</i>        | -1,26 | 1,52E-02 | 1,01E-01 |
| <i>UCK2</i>            | 1,15  | 1,52E-02 | 1,01E-01 |
| <i>BMS1L</i>           | -1,10 | 1,52E-02 | 1,02E-01 |
| <i>LIP1</i>            | -1,17 | 1,52E-02 | 1,02E-01 |
| <i>MYLPF</i>           | 1,23  | 1,52E-02 | 1,02E-01 |
| <i>A_23_P158868</i>    | -2,11 | 1,52E-02 | 1,02E-01 |
| <i>PIK3R5</i>          | 1,09  | 1,52E-02 | 1,02E-01 |
| <i>MIF4GD</i>          | 1,10  | 1,52E-02 | 1,02E-01 |
| <i>WDR77</i>           | -1,09 | 1,52E-02 | 1,02E-01 |
| <i>MPP3</i>            | -1,16 | 1,52E-02 | 1,02E-01 |
| <i>MGC35361</i>        | -1,10 | 1,52E-02 | 1,02E-01 |
| <i>NLF2</i>            | 1,14  | 1,53E-02 | 1,02E-01 |
| <i>ENST00000382216</i> | 1,20  | 1,53E-02 | 1,02E-01 |
| <i>BF366211</i>        | 1,25  | 1,53E-02 | 1,02E-01 |
| <i>MYCBPAP</i>         | -1,15 | 1,53E-02 | 1,02E-01 |
| <i>SMARCA1</i>         | -1,10 | 1,53E-02 | 1,02E-01 |
| <i>XPR1</i>            | 1,07  | 1,53E-02 | 1,02E-01 |
| <i>NIPA2</i>           | 1,08  | 1,53E-02 | 1,02E-01 |
| <i>AA150211</i>        | -1,12 | 1,53E-02 | 1,02E-01 |
| <i>THC2378263</i>      | -1,18 | 1,53E-02 | 1,02E-01 |

|                        |       |          |          |
|------------------------|-------|----------|----------|
| <i>TWSG1</i>           | 1,13  | 1,53E-02 | 1,02E-01 |
| <i>CD180</i>           | -1,12 | 1,53E-02 | 1,02E-01 |
| <i>IGLV2-14</i>        | -1,89 | 1,53E-02 | 1,02E-01 |
| <i>AW168145</i>        | 1,17  | 1,53E-02 | 1,02E-01 |
| <i>LOC126147</i>       | -1,11 | 1,53E-02 | 1,02E-01 |
| <i>ALOX5</i>           | -1,19 | 1,54E-02 | 1,02E-01 |
| <i>EFTUD1</i>          | 1,07  | 1,54E-02 | 1,02E-01 |
| <i>BTG2</i>            | 1,90  | 1,54E-02 | 1,02E-01 |
| <i>A_23_P135926</i>    | 1,10  | 1,54E-02 | 1,02E-01 |
| <i>MGC21675</i>        | -1,10 | 1,54E-02 | 1,02E-01 |
| <i>STRBP</i>           | -1,12 | 1,54E-02 | 1,02E-01 |
| <i>CX3CL1</i>          | 1,22  | 1,54E-02 | 1,03E-01 |
| <i>C12orf34</i>        | 1,15  | 1,54E-02 | 1,03E-01 |
| <i>THC2434948</i>      | -1,18 | 1,55E-02 | 1,03E-01 |
| <i>ENST00000330692</i> | -1,13 | 1,55E-02 | 1,03E-01 |
| <i>THC2316281</i>      | 1,18  | 1,55E-02 | 1,03E-01 |
| <i>PACAP</i>           | -1,71 | 1,55E-02 | 1,03E-01 |
| <i>ZFPM2</i>           | -1,18 | 1,55E-02 | 1,03E-01 |
| <i>C3orf59</i>         | 1,12  | 1,55E-02 | 1,03E-01 |
| <i>RRM2</i>            | -1,14 | 1,55E-02 | 1,03E-01 |
| <i>C3orf32</i>         | 1,37  | 1,55E-02 | 1,03E-01 |
| <i>BQ318652</i>        | -1,20 | 1,55E-02 | 1,03E-01 |
| <i>C6orf64</i>         | -1,11 | 1,56E-02 | 1,03E-01 |
| <i>A_24_P152345</i>    | -1,11 | 1,56E-02 | 1,03E-01 |
| <i>DHX29</i>           | -1,10 | 1,56E-02 | 1,03E-01 |
| <i>HCA112</i>          | 1,27  | 1,56E-02 | 1,03E-01 |
| <i>AK024241</i>        | -1,14 | 1,56E-02 | 1,03E-01 |
| <i>BF512676</i>        | -1,08 | 1,56E-02 | 1,04E-01 |
| <i>ARHGEF19</i>        | -1,21 | 1,56E-02 | 1,04E-01 |
| <i>CCL13</i>           | -1,36 | 1,57E-02 | 1,04E-01 |
| <i>CEP78</i>           | -1,11 | 1,57E-02 | 1,04E-01 |
| <i>ENST00000253048</i> | -1,10 | 1,57E-02 | 1,04E-01 |
| <i>AL562818</i>        | 1,07  | 1,57E-02 | 1,04E-01 |
| <i>ENST00000375855</i> | -1,23 | 1,57E-02 | 1,04E-01 |
| <i>BX108302</i>        | -1,16 | 1,57E-02 | 1,04E-01 |
| <i>ZNF345</i>          | -1,15 | 1,57E-02 | 1,04E-01 |
| <i>HTR3C</i>           | -1,12 | 1,57E-02 | 1,04E-01 |
| <i>FLJ22624</i>        | -1,09 | 1,57E-02 | 1,04E-01 |
| <i>FCMD</i>            | -1,08 | 1,57E-02 | 1,04E-01 |
| <i>C9orf89</i>         | 1,08  | 1,57E-02 | 1,04E-01 |
| <i>BC031274</i>        | 1,08  | 1,57E-02 | 1,04E-01 |
| <i>BC031867</i>        | 1,09  | 1,57E-02 | 1,04E-01 |
| <i>ENST00000321715</i> | 1,12  | 1,57E-02 | 1,04E-01 |
| <i>DTNA</i>            | 1,15  | 1,57E-02 | 1,04E-01 |

|                        |       |          |          |
|------------------------|-------|----------|----------|
| <i>OGFRL1</i>          | 1,20  | 1,57E-02 | 1,04E-01 |
| <i>CR603437</i>        | 1,10  | 1,57E-02 | 1,04E-01 |
| <i>MALT1</i>           | 1,09  | 1,57E-02 | 1,04E-01 |
| <i>C17orf46</i>        | 1,09  | 1,57E-02 | 1,04E-01 |
| <i>DNAJA2</i>          | 1,08  | 1,57E-02 | 1,04E-01 |
| <i>PMS2L3</i>          | -1,10 | 1,58E-02 | 1,04E-01 |
| <i>ENST00000360102</i> | -1,83 | 1,58E-02 | 1,04E-01 |
| <i>PCDHB10</i>         | -1,15 | 1,58E-02 | 1,04E-01 |
| <i>NPIP</i>            | -1,12 | 1,58E-02 | 1,04E-01 |
| <i>ENST00000279968</i> | -1,09 | 1,58E-02 | 1,04E-01 |
| <i>AK097166</i>        | -1,14 | 1,58E-02 | 1,04E-01 |
| <i>ZNF561</i>          | -1,09 | 1,59E-02 | 1,05E-01 |
| <i>DBF4</i>            | -1,08 | 1,59E-02 | 1,05E-01 |
| <i>THC2352847</i>      | 1,12  | 1,59E-02 | 1,05E-01 |
| <i>PLOD3</i>           | -1,08 | 1,59E-02 | 1,05E-01 |
| <i>AXIN2</i>           | -1,24 | 1,59E-02 | 1,05E-01 |
| <i>AK000872</i>        | -1,20 | 1,60E-02 | 1,05E-01 |
| <i>A_32_P169696</i>    | -1,12 | 1,60E-02 | 1,05E-01 |
| <i>FLJ12684</i>        | 1,08  | 1,60E-02 | 1,05E-01 |
| <i>SLC39A2</i>         | -1,45 | 1,60E-02 | 1,05E-01 |
| <i>CD209</i>           | -1,21 | 1,60E-02 | 1,05E-01 |
| <i>DNAJC3</i>          | 1,13  | 1,60E-02 | 1,05E-01 |
| <i>BC033250</i>        | -1,14 | 1,60E-02 | 1,05E-01 |
| <i>RDH11</i>           | -1,10 | 1,60E-02 | 1,05E-01 |
| <i>NMNAT1</i>          | -1,08 | 1,60E-02 | 1,05E-01 |
| <i>BC039414</i>        | 1,27  | 1,60E-02 | 1,05E-01 |
| <i>BC013389</i>        | -1,20 | 1,60E-02 | 1,05E-01 |
| <i>C1orf9</i>          | -1,13 | 1,61E-02 | 1,05E-01 |
| <i>NARG1L</i>          | -1,12 | 1,61E-02 | 1,05E-01 |
| <i>TIMP4</i>           | 1,20  | 1,61E-02 | 1,06E-01 |
| <i>PTGIS</i>           | -1,36 | 1,61E-02 | 1,06E-01 |
| <i>EXOSC2</i>          | -1,09 | 1,61E-02 | 1,06E-01 |
| <i>CSNK1E</i>          | 1,10  | 1,61E-02 | 1,06E-01 |
| <i>X01147</i>          | -1,70 | 1,61E-02 | 1,06E-01 |
| <i>THC2438658</i>      | 1,22  | 1,61E-02 | 1,06E-01 |
| <i>APAF1</i>           | -1,11 | 1,61E-02 | 1,06E-01 |
| <i>FLJ44253</i>        | -1,30 | 1,61E-02 | 1,06E-01 |
| <i>AF119888</i>        | -1,11 | 1,61E-02 | 1,06E-01 |
| <i>THC2269537</i>      | 1,11  | 1,61E-02 | 1,06E-01 |
| <i>A_24_P933135</i>    | 1,11  | 1,62E-02 | 1,06E-01 |
| <i>A_23_P98042</i>     | 1,16  | 1,62E-02 | 1,06E-01 |
| <i>AK026403</i>        | -1,13 | 1,62E-02 | 1,06E-01 |
| <i>DUSP12</i>          | -1,10 | 1,62E-02 | 1,06E-01 |
| <i>NDUFAF1</i>         | -1,08 | 1,62E-02 | 1,06E-01 |

|                        |       |          |          |
|------------------------|-------|----------|----------|
| <i>ACTR1A</i>          | 1,11  | 1,62E-02 | 1,06E-01 |
| <i>A_23_P52868</i>     | -1,10 | 1,62E-02 | 1,06E-01 |
| <i>NRXN1</i>           | 1,24  | 1,62E-02 | 1,06E-01 |
| <i>ENST00000369248</i> | -1,11 | 1,62E-02 | 1,06E-01 |
| <i>A_32_P15887</i>     | 1,09  | 1,62E-02 | 1,06E-01 |
| <i>PICK1</i>           | 1,10  | 1,62E-02 | 1,06E-01 |
| <i>AK056809</i>        | -1,11 | 1,62E-02 | 1,06E-01 |
| <i>A_32_P90615</i>     | -1,30 | 1,62E-02 | 1,06E-01 |
| <i>ENST00000377144</i> | -1,09 | 1,62E-02 | 1,06E-01 |
| <i>STAU2</i>           | 1,08  | 1,63E-02 | 1,06E-01 |
| <i>IL12RB2</i>         | -1,13 | 1,63E-02 | 1,06E-01 |
| <i>POLR2D</i>          | 1,08  | 1,63E-02 | 1,06E-01 |
| <i>A_24_P919629</i>    | -1,09 | 1,63E-02 | 1,06E-01 |
| <i>BQ184357</i>        | 1,16  | 1,63E-02 | 1,06E-01 |
| <i>TMEM161B</i>        | -1,09 | 1,63E-02 | 1,06E-01 |
| <i>LOC254057</i>       | -1,13 | 1,63E-02 | 1,06E-01 |
| <i>FNTA</i>            | -1,12 | 1,63E-02 | 1,06E-01 |
| <i>A_23_P71635</i>     | 1,08  | 1,63E-02 | 1,06E-01 |
| <i>FLJ39779</i>        | 1,20  | 1,63E-02 | 1,06E-01 |
| <i>DDX21</i>           | 1,16  | 1,63E-02 | 1,06E-01 |
| <i>UBE2V2</i>          | 1,12  | 1,64E-02 | 1,07E-01 |
| <i>THC2433033</i>      | 1,14  | 1,64E-02 | 1,07E-01 |
| <i>AF118069</i>        | 1,08  | 1,64E-02 | 1,07E-01 |
| <i>CCRK</i>            | -1,16 | 1,64E-02 | 1,07E-01 |
| <i>MAN1C1</i>          | -1,14 | 1,64E-02 | 1,07E-01 |
| <i>MRS2L</i>           | -1,10 | 1,65E-02 | 1,07E-01 |
| <i>AW589254</i>        | 1,19  | 1,65E-02 | 1,07E-01 |
| <i>A_23_P10987</i>     | -1,09 | 1,65E-02 | 1,07E-01 |
| <i>SLC17A7</i>         | 1,10  | 1,65E-02 | 1,07E-01 |
| <i>ENST00000330731</i> | 1,16  | 1,65E-02 | 1,07E-01 |
| <i>LRFN5</i>           | -1,16 | 1,65E-02 | 1,07E-01 |
| <i>AL536879</i>        | -1,22 | 1,65E-02 | 1,07E-01 |
| <i>A_24_P890956</i>    | 1,16  | 1,65E-02 | 1,07E-01 |
| <i>BC111482</i>        | -1,12 | 1,65E-02 | 1,07E-01 |
| <i>A_24_P33217</i>     | 1,10  | 1,65E-02 | 1,07E-01 |
| <i>BU676775</i>        | -1,10 | 1,65E-02 | 1,07E-01 |
| <i>THC2357547</i>      | -1,13 | 1,66E-02 | 1,07E-01 |
| <i>SLC25A21</i>        | 1,11  | 1,66E-02 | 1,08E-01 |
| <i>GRINL1A</i>         | -1,12 | 1,66E-02 | 1,08E-01 |
| <i>ADAMTS7</i>         | 1,12  | 1,66E-02 | 1,08E-01 |
| <i>A_24_P392661</i>    | -1,11 | 1,66E-02 | 1,08E-01 |
| <i>ENST00000312943</i> | -1,18 | 1,66E-02 | 1,08E-01 |
| <i>DDR2</i>            | 1,18  | 1,66E-02 | 1,08E-01 |
| <i>MOSPD3</i>          | -1,11 | 1,66E-02 | 1,08E-01 |

|                        |       |          |          |
|------------------------|-------|----------|----------|
| <i>TMEM16D</i>         | -1,38 | 1,66E-02 | 1,08E-01 |
| <i>AK123649</i>        | -1,11 | 1,66E-02 | 1,08E-01 |
| <i>BM717049</i>        | -1,28 | 1,67E-02 | 1,08E-01 |
| <i>YEATS2</i>          | -1,14 | 1,67E-02 | 1,08E-01 |
| <i>ENDOGL1</i>         | 1,08  | 1,67E-02 | 1,08E-01 |
| <i>GAPDH</i>           | 1,15  | 1,67E-02 | 1,08E-01 |
| <i>TXNDC2</i>          | -1,09 | 1,67E-02 | 1,08E-01 |
| <i>AK090397</i>        | -1,14 | 1,67E-02 | 1,08E-01 |
| <i>AI340058</i>        | -1,13 | 1,67E-02 | 1,08E-01 |
| <i>BMI1</i>            | -1,10 | 1,67E-02 | 1,08E-01 |
| <i>LOC51149</i>        | -1,16 | 1,67E-02 | 1,08E-01 |
| <i>GCAT</i>            | -1,11 | 1,67E-02 | 1,08E-01 |
| <i>ENST00000372415</i> | 1,10  | 1,67E-02 | 1,08E-01 |
| <i>INPP4A</i>          | 1,12  | 1,67E-02 | 1,08E-01 |
| <i>LOC643684</i>       | -1,16 | 1,67E-02 | 1,08E-01 |
| <i>THC2391003</i>      | 1,09  | 1,68E-02 | 1,08E-01 |
| <i>AA479896</i>        | 1,29  | 1,68E-02 | 1,08E-01 |
| <i>BC039397</i>        | -1,11 | 1,68E-02 | 1,08E-01 |
| <i>ARF6</i>            | 1,14  | 1,68E-02 | 1,08E-01 |
| <i>PAPLN</i>           | -1,18 | 1,68E-02 | 1,08E-01 |
| <i>RNPEP</i>           | -1,11 | 1,68E-02 | 1,08E-01 |
| <i>AK091744</i>        | -1,18 | 1,68E-02 | 1,08E-01 |
| <i>HIST1H3G</i>        | 1,12  | 1,68E-02 | 1,08E-01 |
| <i>FAM119A</i>         | 1,13  | 1,68E-02 | 1,08E-01 |
| <i>FAM82B</i>          | 1,13  | 1,68E-02 | 1,08E-01 |
| <i>LPIN3</i>           | 1,09  | 1,69E-02 | 1,09E-01 |
| <i>LAX1</i>            | -1,16 | 1,69E-02 | 1,09E-01 |
| <i>THC2280383</i>      | -1,12 | 1,69E-02 | 1,09E-01 |
| <i>LOC440309</i>       | 1,10  | 1,69E-02 | 1,09E-01 |
| <i>MRPL47</i>          | 1,12  | 1,69E-02 | 1,09E-01 |
| <i>LTF</i>             | -1,24 | 1,69E-02 | 1,09E-01 |
| <i>CASP4</i>           | 1,15  | 1,69E-02 | 1,09E-01 |
| <i>AW949170</i>        | 1,15  | 1,69E-02 | 1,09E-01 |
| <i>ENST00000369615</i> | 1,22  | 1,69E-02 | 1,09E-01 |
| <i>LOC643903</i>       | 1,11  | 1,69E-02 | 1,09E-01 |
| <i>AA890136</i>        | 1,14  | 1,69E-02 | 1,09E-01 |
| <i>C17orf72</i>        | 1,17  | 1,69E-02 | 1,09E-01 |
| <i>A_32_P34167</i>     | -1,13 | 1,70E-02 | 1,09E-01 |
| <i>ENST00000332468</i> | -1,07 | 1,70E-02 | 1,09E-01 |
| <i>A_24_P281443</i>    | 1,32  | 1,70E-02 | 1,09E-01 |
| <i>LOC51152</i>        | -1,20 | 1,70E-02 | 1,09E-01 |
| <i>ZFYVE26</i>         | -1,08 | 1,70E-02 | 1,09E-01 |
| <i>C14orf91</i>        | 1,14  | 1,70E-02 | 1,09E-01 |
| <i>RASAL2</i>          | 1,15  | 1,70E-02 | 1,09E-01 |

|                        |       |          |          |
|------------------------|-------|----------|----------|
| <i>A_24_P708161</i>    | 1,10  | 1,70E-02 | 1,09E-01 |
| <i>ATF7IP</i>          | 1,10  | 1,70E-02 | 1,09E-01 |
| <i>DFNB31</i>          | 1,17  | 1,70E-02 | 1,09E-01 |
| <i>AK096405</i>        | -1,11 | 1,71E-02 | 1,09E-01 |
| <i>SACM1L</i>          | -1,10 | 1,71E-02 | 1,09E-01 |
| <i>ENST00000382108</i> | 1,15  | 1,71E-02 | 1,09E-01 |
| <i>MGC11332</i>        | 1,18  | 1,71E-02 | 1,09E-01 |
| <i>AURKA</i>           | -1,10 | 1,71E-02 | 1,09E-01 |
| <i>THC2348879</i>      | 1,11  | 1,71E-02 | 1,09E-01 |
| <i>THC2449500</i>      | 1,20  | 1,71E-02 | 1,10E-01 |
| <i>LCP2</i>            | -1,19 | 1,71E-02 | 1,10E-01 |
| <i>AP1S2</i>           | -1,12 | 1,71E-02 | 1,10E-01 |
| <i>DNAH11</i>          | -1,13 | 1,71E-02 | 1,10E-01 |
| <i>BU753102</i>        | -1,12 | 1,71E-02 | 1,10E-01 |
| <i>LOC285544</i>       | -1,11 | 1,71E-02 | 1,10E-01 |
| <i>A_24_P936393</i>    | -1,21 | 1,71E-02 | 1,10E-01 |
| <i>THC2400121</i>      | 2,04  | 1,71E-02 | 1,10E-01 |
| <i>BC041636</i>        | -1,15 | 1,72E-02 | 1,10E-01 |
| <i>RNASET2</i>         | -1,12 | 1,72E-02 | 1,10E-01 |
| <i>FBXO34</i>          | 1,09  | 1,72E-02 | 1,10E-01 |
| <i>A_24_P264644</i>    | 1,26  | 1,72E-02 | 1,10E-01 |
| <i>SMC5</i>            | 1,13  | 1,72E-02 | 1,10E-01 |
| <i>VN1R1</i>           | -1,11 | 1,72E-02 | 1,10E-01 |
| <i>THC2305868</i>      | -1,13 | 1,72E-02 | 1,10E-01 |
| <i>DPY19L1P1</i>       | -1,13 | 1,72E-02 | 1,10E-01 |
| <i>MGC27345</i>        | -1,09 | 1,72E-02 | 1,10E-01 |
| <i>ENST00000367740</i> | -1,10 | 1,73E-02 | 1,10E-01 |
| <i>ENST00000324709</i> | -1,25 | 1,73E-02 | 1,10E-01 |
| <i>THC2440162</i>      | -1,29 | 1,73E-02 | 1,10E-01 |
| <i>BC040293</i>        | -1,71 | 1,73E-02 | 1,11E-01 |
| <i>AK023737</i>        | -1,16 | 1,73E-02 | 1,11E-01 |
| <i>C14orf109</i>       | -1,10 | 1,73E-02 | 1,11E-01 |
| <i>RCOR2</i>           | 1,09  | 1,73E-02 | 1,11E-01 |
| <i>TNC</i>             | 1,34  | 1,73E-02 | 1,11E-01 |
| <i>THC2345720</i>      | -1,15 | 1,73E-02 | 1,11E-01 |
| <i>A_24_P688872</i>    | 1,11  | 1,73E-02 | 1,11E-01 |
| <i>MRPL16</i>          | -1,08 | 1,74E-02 | 1,11E-01 |
| <i>ZFP37</i>           | -1,15 | 1,74E-02 | 1,11E-01 |
| <i>MYB</i>             | 1,64  | 1,74E-02 | 1,11E-01 |
| <i>A_23_P120606</i>    | -1,22 | 1,74E-02 | 1,11E-01 |
| <i>A_24_P16230</i>     | 1,27  | 1,74E-02 | 1,11E-01 |
| <i>A_32_P72477</i>     | -1,19 | 1,74E-02 | 1,11E-01 |
| <i>CYP2B6</i>          | -1,17 | 1,74E-02 | 1,11E-01 |
| <i>AK024173</i>        | -1,17 | 1,74E-02 | 1,11E-01 |



|                        |       |          |          |
|------------------------|-------|----------|----------|
| <i>C20orf132</i>       | -1,13 | 1,74E-02 | 1,11E-01 |
| <i>HELZ</i>            | -1,11 | 1,74E-02 | 1,11E-01 |
| <i>ZNF121</i>          | 1,08  | 1,74E-02 | 1,11E-01 |
| <i>TMEM47</i>          | 1,19  | 1,74E-02 | 1,11E-01 |
| <i>CRYM</i>            | 1,46  | 1,74E-02 | 1,11E-01 |
| <i>THC2422220</i>      | -1,14 | 1,74E-02 | 1,11E-01 |
| <i>A_23_P60189</i>     | -1,12 | 1,74E-02 | 1,11E-01 |
| <i>VILL</i>            | -1,10 | 1,74E-02 | 1,11E-01 |
| <i>RBM39</i>           | -1,09 | 1,74E-02 | 1,11E-01 |
| <i>TMCC2</i>           | 1,21  | 1,74E-02 | 1,11E-01 |
| <i>AF355802</i>        | -1,11 | 1,75E-02 | 1,11E-01 |
| <i>LOC440956</i>       | -1,09 | 1,75E-02 | 1,11E-01 |
| <i>DYNC1LI1</i>        | 1,09  | 1,75E-02 | 1,11E-01 |
| <i>GDF15</i>           | 1,55  | 1,75E-02 | 1,11E-01 |
| <i>AK124941</i>        | -1,24 | 1,75E-02 | 1,11E-01 |
| <i>LOC115098</i>       | 1,08  | 1,75E-02 | 1,11E-01 |
| <i>ELA2B</i>           | 1,08  | 1,75E-02 | 1,11E-01 |
| <i>HEXIM2</i>          | -1,11 | 1,75E-02 | 1,11E-01 |
| <i>ZNF84</i>           | -1,08 | 1,75E-02 | 1,11E-01 |
| <i>MGC10997</i>        | -1,09 | 1,75E-02 | 1,11E-01 |
| <i>THC2376757</i>      | -1,13 | 1,76E-02 | 1,11E-01 |
| <i>A_24_P358406</i>    | 1,31  | 1,76E-02 | 1,11E-01 |
| <i>AICDA</i>           | -1,13 | 1,76E-02 | 1,11E-01 |
| <i>OTC</i>             | 1,40  | 1,76E-02 | 1,11E-01 |
| <i>PACSIN1</i>         | -1,15 | 1,76E-02 | 1,11E-01 |
| <i>C8orf38</i>         | -1,09 | 1,76E-02 | 1,11E-01 |
| <i>BC033999</i>        | -1,09 | 1,76E-02 | 1,11E-01 |
| <i>ENST00000367866</i> | -1,13 | 1,76E-02 | 1,11E-01 |
| <i>THC2409451</i>      | -1,10 | 1,76E-02 | 1,11E-01 |
| <i>ENST00000361266</i> | -1,33 | 1,76E-02 | 1,11E-01 |
| <i>BC039097</i>        | 1,14  | 1,76E-02 | 1,12E-01 |
| <i>A_32_P64894</i>     | 1,13  | 1,77E-02 | 1,12E-01 |
| <i>THC2404028</i>      | 1,25  | 1,77E-02 | 1,12E-01 |
| <i>AMY1C</i>           | -1,17 | 1,77E-02 | 1,12E-01 |
| <i>ST7OT1</i>          | 1,18  | 1,77E-02 | 1,12E-01 |
| <i>ZNF182</i>          | -1,13 | 1,77E-02 | 1,12E-01 |
| <i>THC2313242</i>      | -1,08 | 1,77E-02 | 1,12E-01 |
| <i>A_23_P10060</i>     | -1,07 | 1,77E-02 | 1,12E-01 |
| <i>RCN2</i>            | 1,09  | 1,77E-02 | 1,12E-01 |
| <i>LOC442013</i>       | 1,20  | 1,77E-02 | 1,12E-01 |
| <i>HKR1</i>            | -1,11 | 1,77E-02 | 1,12E-01 |
| <i>NOXO1</i>           | -1,09 | 1,77E-02 | 1,12E-01 |
| <i>PHKA2</i>           | -1,12 | 1,78E-02 | 1,12E-01 |
| <i>RPL5</i>            | -1,10 | 1,78E-02 | 1,12E-01 |

|                        |       |          |          |
|------------------------|-------|----------|----------|
| <i>C17orf85</i>        | -1,08 | 1,78E-02 | 1,12E-01 |
| <i>HIST1H2AH</i>       | 1,11  | 1,78E-02 | 1,12E-01 |
| <i>ITGB1</i>           | 1,16  | 1,78E-02 | 1,12E-01 |
| <i>CXorf2</i>          | -1,07 | 1,78E-02 | 1,12E-01 |
| <i>TMEM44</i>          | -1,11 | 1,78E-02 | 1,12E-01 |
| <i>SMPDL3B</i>         | 1,08  | 1,78E-02 | 1,12E-01 |
| <i>HIST3H3</i>         | 1,09  | 1,78E-02 | 1,12E-01 |
| <i>BCO38983</i>        | 1,15  | 1,78E-02 | 1,12E-01 |
| <i>A_24_P418687</i>    | 1,30  | 1,78E-02 | 1,12E-01 |
| <i>BX101252</i>        | 1,12  | 1,78E-02 | 1,12E-01 |
| <i>ENST00000239730</i> | 1,15  | 1,78E-02 | 1,12E-01 |
| <i>CX869207</i>        | -1,11 | 1,78E-02 | 1,12E-01 |
| <i>KIF3B</i>           | 1,08  | 1,79E-02 | 1,12E-01 |
| <i>EGR1</i>            | 1,90  | 1,79E-02 | 1,12E-01 |
| <i>LOC440361</i>       | -1,68 | 1,79E-02 | 1,12E-01 |
| <i>N67009</i>          | 1,09  | 1,79E-02 | 1,12E-01 |
| <i>THC2377764</i>      | -1,27 | 1,79E-02 | 1,13E-01 |
| <i>THC2419011</i>      | 1,12  | 1,79E-02 | 1,13E-01 |
| <i>ST8SIA4</i>         | 1,16  | 1,79E-02 | 1,13E-01 |
| <i>RCHY1</i>           | -1,12 | 1,79E-02 | 1,13E-01 |
| <i>OR52K3P</i>         | 1,08  | 1,79E-02 | 1,13E-01 |
| <i>AMOTL2</i>          | 1,30  | 1,79E-02 | 1,13E-01 |
| <i>BE970058</i>        | -1,21 | 1,80E-02 | 1,13E-01 |
| <i>LOC647131</i>       | 1,19  | 1,80E-02 | 1,13E-01 |
| <i>A_24_P358131</i>    | 1,25  | 1,80E-02 | 1,13E-01 |
| <i>BX107768</i>        | -1,08 | 1,80E-02 | 1,13E-01 |
| <i>SLC25A25</i>        | 1,55  | 1,80E-02 | 1,13E-01 |
| <i>WSB2</i>            | 1,11  | 1,80E-02 | 1,13E-01 |
| <i>THC2314239</i>      | -1,10 | 1,80E-02 | 1,13E-01 |
| <i>TLR6</i>            | -1,12 | 1,80E-02 | 1,13E-01 |
| <i>DNAJB7</i>          | -1,09 | 1,80E-02 | 1,13E-01 |
| <i>RPL18</i>           | -1,08 | 1,80E-02 | 1,13E-01 |
| <i>BX105952</i>        | -1,09 | 1,81E-02 | 1,13E-01 |
| <i>RNPEPL1</i>         | 1,09  | 1,81E-02 | 1,13E-01 |
| <i>A_24_P332263</i>    | 1,13  | 1,81E-02 | 1,13E-01 |
| <i>THC2455783</i>      | -1,09 | 1,81E-02 | 1,13E-01 |
| <i>FGD4</i>            | 1,26  | 1,81E-02 | 1,13E-01 |
| <i>D2HGDH</i>          | -1,13 | 1,81E-02 | 1,13E-01 |
| <i>A_24_P648813</i>    | 1,10  | 1,81E-02 | 1,13E-01 |
| <i>RYR2</i>            | 1,25  | 1,81E-02 | 1,13E-01 |
| <i>MGAT5</i>           | 1,12  | 1,81E-02 | 1,13E-01 |
| <i>AK021432</i>        | -1,11 | 1,81E-02 | 1,13E-01 |
| <i>LOC56757</i>        | -1,13 | 1,81E-02 | 1,13E-01 |
| <i>ZNF578</i>          | -1,10 | 1,81E-02 | 1,13E-01 |

|                        |       |          |          |
|------------------------|-------|----------|----------|
| <i>OTUB1</i>           | 1,08  | 1,81E-02 | 1,13E-01 |
| <i>KIAA0963</i>        | 1,19  | 1,82E-02 | 1,14E-01 |
| <i>SPIN-2</i>          | -1,09 | 1,82E-02 | 1,14E-01 |
| <i>AF130102</i>        | 1,09  | 1,82E-02 | 1,14E-01 |
| <i>ENST00000330910</i> | 1,07  | 1,82E-02 | 1,14E-01 |
| <i>ZNF651</i>          | 1,14  | 1,82E-02 | 1,14E-01 |
| <i>EVI1</i>            | 1,15  | 1,82E-02 | 1,14E-01 |
| <i>CCDC25</i>          | 1,09  | 1,83E-02 | 1,14E-01 |
| <i>POU2AF1</i>         | -1,58 | 1,83E-02 | 1,14E-01 |
| <i>LOC643011</i>       | -1,13 | 1,83E-02 | 1,14E-01 |
| <i>GEMIN7</i>          | -1,11 | 1,83E-02 | 1,14E-01 |
| <i>CA948108</i>        | -1,10 | 1,83E-02 | 1,14E-01 |
| <i>HERC1</i>           | -1,08 | 1,83E-02 | 1,14E-01 |
| <i>ZNF506</i>          | -1,15 | 1,83E-02 | 1,14E-01 |
| <i>KIAA1661</i>        | -1,18 | 1,83E-02 | 1,14E-01 |
| <i>S61396</i>          | -1,13 | 1,83E-02 | 1,14E-01 |
| <i>KLRC4</i>           | -1,18 | 1,83E-02 | 1,14E-01 |
| <i>BC019907</i>        | -1,16 | 1,83E-02 | 1,14E-01 |
| <i>SNUPN</i>           | -1,09 | 1,83E-02 | 1,14E-01 |
| <i>TMED7</i>           | 1,15  | 1,83E-02 | 1,14E-01 |
| <i>A_24_P401100</i>    | -1,08 | 1,84E-02 | 1,14E-01 |
| <i>IRF2BP1</i>         | -1,13 | 1,84E-02 | 1,14E-01 |
| <i>BC038512</i>        | 1,20  | 1,84E-02 | 1,14E-01 |
| <i>BM690036</i>        | -1,15 | 1,84E-02 | 1,14E-01 |
| <i>CR619482</i>        | -1,07 | 1,84E-02 | 1,14E-01 |
| <i>TARBP2</i>          | -1,12 | 1,84E-02 | 1,14E-01 |
| <i>ENST00000284676</i> | 1,34  | 1,84E-02 | 1,15E-01 |
| <i>A_32_P146786</i>    | -1,17 | 1,85E-02 | 1,15E-01 |
| <i>CD44</i>            | 1,20  | 1,85E-02 | 1,15E-01 |
| <i>F8A1</i>            | -1,15 | 1,85E-02 | 1,15E-01 |
| <i>MTA1</i>            | -1,07 | 1,85E-02 | 1,15E-01 |
| <i>PLA2G12B</i>        | 1,09  | 1,85E-02 | 1,15E-01 |
| <i>BC009036</i>        | -1,17 | 1,85E-02 | 1,15E-01 |
| <i>CR936609</i>        | -1,10 | 1,85E-02 | 1,15E-01 |
| <i>DTL</i>             | -1,16 | 1,85E-02 | 1,15E-01 |
| <i>ASPH</i>            | 1,12  | 1,85E-02 | 1,15E-01 |
| <i>BC009228</i>        | -1,13 | 1,86E-02 | 1,15E-01 |
| <i>A_24_P101261</i>    | 1,14  | 1,86E-02 | 1,15E-01 |
| <i>ZNF442</i>          | -1,09 | 1,86E-02 | 1,15E-01 |
| <i>DKK2</i>            | -1,37 | 1,86E-02 | 1,15E-01 |
| <i>THC2446845</i>      | -1,14 | 1,86E-02 | 1,15E-01 |
| <i>TMEM74</i>          | 1,11  | 1,86E-02 | 1,15E-01 |
| <i>BC040982</i>        | -1,13 | 1,86E-02 | 1,15E-01 |
| <i>ENST00000380344</i> | 1,14  | 1,86E-02 | 1,15E-01 |

|                        |       |          |          |
|------------------------|-------|----------|----------|
| <i>A_24_P298228</i>    | 1,16  | 1,86E-02 | 1,15E-01 |
| <i>ENST00000382496</i> | -1,24 | 1,86E-02 | 1,15E-01 |
| <i>IL16</i>            | -1,16 | 1,86E-02 | 1,15E-01 |
| <i>A_24_P306704</i>    | 1,34  | 1,86E-02 | 1,15E-01 |
| <i>BC064553</i>        | -1,15 | 1,87E-02 | 1,15E-01 |
| <i>AF083118</i>        | -1,10 | 1,87E-02 | 1,15E-01 |
| <i>THC2280976</i>      | -1,16 | 1,87E-02 | 1,16E-01 |
| <i>ENST00000265018</i> | -1,09 | 1,87E-02 | 1,16E-01 |
| <i>ABHD2</i>           | 1,10  | 1,87E-02 | 1,16E-01 |
| <i>ENST00000355095</i> | -1,17 | 1,87E-02 | 1,16E-01 |
| <i>AY003763</i>        | -1,71 | 1,88E-02 | 1,16E-01 |
| <i>THC2314764</i>      | -1,17 | 1,88E-02 | 1,16E-01 |
| <i>OSGEP</i>           | -1,10 | 1,88E-02 | 1,16E-01 |
| <i>FANCD2</i>          | -1,07 | 1,88E-02 | 1,16E-01 |
| <i>PINX1</i>           | 1,09  | 1,88E-02 | 1,16E-01 |
| <i>A_32_P32315</i>     | 1,14  | 1,88E-02 | 1,16E-01 |
| <i>ECT2</i>            | 1,15  | 1,88E-02 | 1,16E-01 |
| <i>FLJ20186</i>        | 1,10  | 1,88E-02 | 1,16E-01 |
| <i>A_24_P281643</i>    | 1,10  | 1,88E-02 | 1,16E-01 |
| <i>PNPLA3</i>          | -1,14 | 1,88E-02 | 1,16E-01 |
| <i>THC2320434</i>      | -1,12 | 1,88E-02 | 1,16E-01 |
| <i>RAN</i>             | 1,12  | 1,88E-02 | 1,16E-01 |
| <i>NUP93</i>           | 1,13  | 1,88E-02 | 1,16E-01 |
| <i>AL050285</i>        | -1,11 | 1,89E-02 | 1,16E-01 |
| <i>A_24_P383660</i>    | 1,25  | 1,89E-02 | 1,16E-01 |
| <i>A_24_P530830</i>    | 1,09  | 1,89E-02 | 1,16E-01 |
| <i>ABHD14B</i>         | -1,09 | 1,89E-02 | 1,16E-01 |
| <i>AK056260</i>        | -1,11 | 1,89E-02 | 1,16E-01 |
| <i>FBXL4</i>           | -1,13 | 1,89E-02 | 1,16E-01 |
| <i>UBC</i>             | 1,11  | 1,89E-02 | 1,16E-01 |
| <i>EFHD2</i>           | 1,13  | 1,89E-02 | 1,16E-01 |
| <i>C1QTNF5</i>         | 1,18  | 1,89E-02 | 1,16E-01 |
| <i>ZNF658</i>          | -1,12 | 1,90E-02 | 1,17E-01 |
| <i>LOC641518</i>       | -1,10 | 1,89E-02 | 1,17E-01 |
| <i>RAB7L1</i>          | 1,10  | 1,89E-02 | 1,17E-01 |
| <i>GRSF1</i>           | -1,09 | 1,90E-02 | 1,17E-01 |
| <i>BC040195</i>        | -1,18 | 1,90E-02 | 1,17E-01 |
| <i>GRIN2A</i>          | 1,16  | 1,90E-02 | 1,17E-01 |
| <i>AF247042</i>        | 1,26  | 1,90E-02 | 1,17E-01 |
| <i>BQ310542</i>        | -1,14 | 1,90E-02 | 1,17E-01 |
| <i>CIB2</i>            | -1,24 | 1,90E-02 | 1,17E-01 |
| <i>PLP1</i>            | 1,35  | 1,90E-02 | 1,17E-01 |
| <i>CMTM8</i>           | 1,17  | 1,90E-02 | 1,17E-01 |
| <i>PTD004</i>          | 1,16  | 1,91E-02 | 1,17E-01 |

|                        |       |          |          |
|------------------------|-------|----------|----------|
| <i>IGSF9</i>           | 1,16  | 1,91E-02 | 1,17E-01 |
| <i>RPUSD3</i>          | -1,13 | 1,91E-02 | 1,17E-01 |
| <i>KLRC3</i>           | -1,09 | 1,91E-02 | 1,17E-01 |
| <i>A_32_P11673</i>     | -1,29 | 1,91E-02 | 1,17E-01 |
| <i>GUCY1A2</i>         | 1,27  | 1,91E-02 | 1,17E-01 |
| <i>MGC16142</i>        | -1,08 | 1,91E-02 | 1,17E-01 |
| <i>ARID4B</i>          | -1,11 | 1,91E-02 | 1,17E-01 |
| <i>THC2440906</i>      | -1,11 | 1,91E-02 | 1,17E-01 |
| <i>ZNF567</i>          | -1,15 | 1,92E-02 | 1,17E-01 |
| <i>KCTD18</i>          | -1,12 | 1,92E-02 | 1,17E-01 |
| <i>COQ5</i>            | -1,11 | 1,92E-02 | 1,17E-01 |
| <i>TMC7</i>            | 1,12  | 1,92E-02 | 1,17E-01 |
| <i>DAXX</i>            | 1,14  | 1,92E-02 | 1,17E-01 |
| <i>MYO1G</i>           | -1,13 | 1,92E-02 | 1,18E-01 |
| <i>ENST00000367013</i> | 1,20  | 1,92E-02 | 1,18E-01 |
| <i>SASS6</i>           | -1,12 | 1,92E-02 | 1,18E-01 |
| <i>IGF2AS</i>          | -1,12 | 1,92E-02 | 1,18E-01 |
| <i>CHRAC1</i>          | 1,16  | 1,92E-02 | 1,18E-01 |
| <i>DOK4</i>            | -1,08 | 1,92E-02 | 1,18E-01 |
| <i>BC047708</i>        | -1,10 | 1,92E-02 | 1,18E-01 |
| <i>CIAS1</i>           | 1,30  | 1,92E-02 | 1,18E-01 |
| <i>HTLF</i>            | 1,23  | 1,92E-02 | 1,18E-01 |
| <i>AF318318</i>        | -1,19 | 1,93E-02 | 1,18E-01 |
| <i>LOH11CR2A</i>       | -1,18 | 1,93E-02 | 1,18E-01 |
| <i>BM989272</i>        | 1,11  | 1,93E-02 | 1,18E-01 |
| <i>ZNF226</i>          | -1,11 | 1,93E-02 | 1,18E-01 |
| <i>ZNF45</i>           | -1,09 | 1,93E-02 | 1,18E-01 |
| <i>ENST00000295859</i> | 1,10  | 1,93E-02 | 1,18E-01 |
| <i>ZYG11B</i>          | -1,10 | 1,93E-02 | 1,18E-01 |
| <i>COX4I2</i>          | 1,13  | 1,93E-02 | 1,18E-01 |
| <i>C10orf64</i>        | -1,08 | 1,93E-02 | 1,18E-01 |
| <i>A_24_P32735</i>     | 1,16  | 1,93E-02 | 1,18E-01 |
| <i>RAB11FIP1</i>       | 1,20  | 1,93E-02 | 1,18E-01 |
| <i>THC2410817</i>      | -1,22 | 1,93E-02 | 1,18E-01 |
| <i>THC2369244</i>      | -1,22 | 1,93E-02 | 1,18E-01 |
| <i>FLJ20701</i>        | -1,21 | 1,93E-02 | 1,18E-01 |
| <i>BIN2</i>            | -1,17 | 1,93E-02 | 1,18E-01 |
| <i>BIVM</i>            | -1,11 | 1,93E-02 | 1,18E-01 |
| <i>UBE2B</i>           | 1,10  | 1,94E-02 | 1,18E-01 |
| <i>M84605</i>          | 1,10  | 1,94E-02 | 1,18E-01 |
| <i>A_32_P194182</i>    | -1,15 | 1,94E-02 | 1,18E-01 |
| <i>A_24_P213034</i>    | 1,17  | 1,94E-02 | 1,18E-01 |
| <i>AK021804</i>        | -1,28 | 1,94E-02 | 1,18E-01 |
| <i>VWF</i>             | 1,21  | 1,94E-02 | 1,18E-01 |

|                 |       |          |          |
|-----------------|-------|----------|----------|
| B3GNT2          | 1,15  | 1,94E-02 | 1,18E-01 |
| FLJ90723        | -1,22 | 1,94E-02 | 1,18E-01 |
| THC2316878      | -1,18 | 1,94E-02 | 1,18E-01 |
| SETD6           | -1,13 | 1,95E-02 | 1,18E-01 |
| THC2445005      | -1,17 | 1,95E-02 | 1,18E-01 |
| A_23_P112957    | -1,34 | 1,95E-02 | 1,19E-01 |
| PPAPDC2         | -1,13 | 1,95E-02 | 1,19E-01 |
| AMDHD1          | -1,13 | 1,95E-02 | 1,19E-01 |
| ENST00000290607 | 1,11  | 1,95E-02 | 1,19E-01 |
| SERPINA3        | 1,55  | 1,95E-02 | 1,19E-01 |
| ZNF671          | -1,20 | 1,95E-02 | 1,19E-01 |
| A_23_P146981    | 1,11  | 1,95E-02 | 1,19E-01 |
| ENST00000380304 | -1,16 | 1,95E-02 | 1,19E-01 |
| A_24_P281374    | 1,24  | 1,95E-02 | 1,19E-01 |
| FAP             | -1,40 | 1,95E-02 | 1,19E-01 |
| THC2439430      | -1,13 | 1,95E-02 | 1,19E-01 |
| ENST00000285082 | 1,14  | 1,95E-02 | 1,19E-01 |
| A_32_P42149     | -1,09 | 1,96E-02 | 1,19E-01 |
| LPHN1           | -1,17 | 1,96E-02 | 1,19E-01 |
| KLHDC3          | -1,08 | 1,96E-02 | 1,19E-01 |
| FGD3            | -1,16 | 1,96E-02 | 1,19E-01 |
| THY1            | -1,30 | 1,96E-02 | 1,19E-01 |
| SETD8           | 1,11  | 1,96E-02 | 1,19E-01 |
| BG284526        | 1,12  | 1,96E-02 | 1,19E-01 |
| FLJ43276        | 1,13  | 1,96E-02 | 1,19E-01 |
| THC2320008      | -1,19 | 1,96E-02 | 1,19E-01 |
| AK097724        | -1,14 | 1,96E-02 | 1,19E-01 |
| ENST00000374860 | 1,21  | 1,96E-02 | 1,19E-01 |
| NEUROD2         | 1,09  | 1,97E-02 | 1,19E-01 |
| LOC201229       | -1,12 | 1,97E-02 | 1,19E-01 |
| EFS             | -1,10 | 1,97E-02 | 1,19E-01 |
| AF305821        | -1,09 | 1,97E-02 | 1,19E-01 |
| BX641027        | -1,20 | 1,97E-02 | 1,19E-01 |
| TBC1D13         | -1,10 | 1,97E-02 | 1,19E-01 |
| LOC149837       | 1,10  | 1,97E-02 | 1,19E-01 |
| SLC12A6         | 1,12  | 1,97E-02 | 1,19E-01 |
| AV756170        | 1,54  | 1,97E-02 | 1,19E-01 |
| NAP1L3          | -1,28 | 1,97E-02 | 1,19E-01 |
| A_32_P223747    | -1,16 | 1,97E-02 | 1,19E-01 |
| THC2398758      | -1,10 | 1,97E-02 | 1,19E-01 |
| ENST00000377223 | -1,10 | 1,97E-02 | 1,19E-01 |
| AK097654        | -1,09 | 1,97E-02 | 1,19E-01 |
| GPR21           | 1,09  | 1,98E-02 | 1,19E-01 |
| NUPL2           | -1,14 | 1,98E-02 | 1,19E-01 |

|                     |       |          |          |
|---------------------|-------|----------|----------|
| <i>FNBP1L</i>       | -1,15 | 1,98E-02 | 1,20E-01 |
| <i>CRY1</i>         | 1,12  | 1,98E-02 | 1,20E-01 |
| <i>SGK</i>          | 1,52  | 1,98E-02 | 1,20E-01 |
| <i>A_24_P752362</i> | 1,12  | 1,98E-02 | 1,20E-01 |
| <i>BF851022</i>     | 1,07  | 1,99E-02 | 1,20E-01 |
| <i>SMA4</i>         | -1,31 | 1,99E-02 | 1,20E-01 |
| <i>DENND2A</i>      | -1,17 | 1,99E-02 | 1,20E-01 |
| <i>X57818</i>       | -1,54 | 1,99E-02 | 1,20E-01 |
| <i>AK054580</i>     | -1,11 | 1,99E-02 | 1,20E-01 |
| <i>HOOK2</i>        | -1,10 | 1,99E-02 | 1,20E-01 |
| <i>A_24_P230457</i> | 1,13  | 1,99E-02 | 1,20E-01 |
| <i>BC032019</i>     | 1,10  | 1,99E-02 | 1,20E-01 |
| <i>CATSPER2</i>     | -1,12 | 1,99E-02 | 1,20E-01 |
| <i>NDFIP2</i>       | 1,18  | 2,00E-02 | 1,20E-01 |
| <i>TMOD1</i>        | 1,34  | 2,00E-02 | 1,20E-01 |
| <i>LRRC27</i>       | -1,12 | 2,00E-02 | 1,20E-01 |
| <i>THC2437888</i>   | 1,11  | 2,00E-02 | 1,20E-01 |
| <i>HMG1L1</i>       | 1,12  | 2,00E-02 | 1,20E-01 |
| <i>THC2309312</i>   | 1,16  | 2,00E-02 | 1,20E-01 |
| <i>LOC645858</i>    | 1,09  | 2,00E-02 | 1,20E-01 |
| <i>UBE1L2</i>       | 1,14  | 2,00E-02 | 1,20E-01 |
| <i>LOC648674</i>    | -1,13 | 2,00E-02 | 1,20E-01 |
| <i>RNF135</i>       | -1,12 | 2,00E-02 | 1,20E-01 |
| <i>SLC41A2</i>      | 1,16  | 2,00E-02 | 1,20E-01 |
| <i>LEAP-2</i>       | -1,15 | 2,00E-02 | 1,20E-01 |
| <i>A_24_P230009</i> | -1,12 | 2,00E-02 | 1,20E-01 |
| <i>THC2397697</i>   | -1,12 | 2,01E-02 | 1,20E-01 |
| <i>OPTC</i>         | 1,06  | 2,01E-02 | 1,20E-01 |
| <i>GUCA1C</i>       | 1,08  | 2,01E-02 | 1,20E-01 |
| <i>PBX2</i>         | 1,11  | 2,01E-02 | 1,20E-01 |
| <i>ELA2A</i>        | 1,16  | 2,01E-02 | 1,20E-01 |
| <i>REL</i>          | 1,21  | 2,01E-02 | 1,20E-01 |
| <i>A_32_P114146</i> | 1,09  | 2,01E-02 | 1,21E-01 |
| <i>A_32_P93584</i>  | 1,18  | 2,01E-02 | 1,21E-01 |
| <i>THC2283359</i>   | -1,11 | 2,01E-02 | 1,21E-01 |
| <i>DHX9</i>         | -1,07 | 2,01E-02 | 1,21E-01 |
| <i>ARHGEF10L</i>    | 1,18  | 2,01E-02 | 1,21E-01 |
| <i>A_24_P358619</i> | -1,19 | 2,02E-02 | 1,21E-01 |
| <i>SMAD3</i>        | -1,14 | 2,01E-02 | 1,21E-01 |
| <i>PTPDC1</i>       | 1,07  | 2,02E-02 | 1,21E-01 |
| <i>UGT2B28</i>      | 1,09  | 2,02E-02 | 1,21E-01 |
| <i>INSM1</i>        | 1,06  | 2,02E-02 | 1,21E-01 |
| <i>C10orf75</i>     | -1,10 | 2,02E-02 | 1,21E-01 |
| <i>LENG1</i>        | 1,10  | 2,02E-02 | 1,21E-01 |

|                        |       |          |          |
|------------------------|-------|----------|----------|
| <i>BU684362</i>        | -1,11 | 2,02E-02 | 1,21E-01 |
| <i>RPS24</i>           | -1,06 | 2,02E-02 | 1,21E-01 |
| <i>CR610131</i>        | -1,14 | 2,02E-02 | 1,21E-01 |
| <i>THC2440296</i>      | -1,08 | 2,02E-02 | 1,21E-01 |
| <i>AA195394</i>        | 1,13  | 2,02E-02 | 1,21E-01 |
| <i>ENST00000360903</i> | -1,09 | 2,02E-02 | 1,21E-01 |
| <i>HOXB7</i>           | 1,13  | 2,03E-02 | 1,21E-01 |
| <i>CXorf57</i>         | -1,17 | 2,03E-02 | 1,21E-01 |
| <i>AY358263</i>        | 1,12  | 2,03E-02 | 1,21E-01 |
| <i>THC2407034</i>      | -1,12 | 2,03E-02 | 1,22E-01 |
| <i>S81916</i>          | 1,11  | 2,03E-02 | 1,22E-01 |
| <i>ZNF681</i>          | -1,16 | 2,04E-02 | 1,22E-01 |
| <i>ZNF33B</i>          | -1,11 | 2,04E-02 | 1,22E-01 |
| <i>RNF187</i>          | -1,09 | 2,04E-02 | 1,22E-01 |
| <i>TUBA3</i>           | 1,18  | 2,04E-02 | 1,22E-01 |
| <i>UNG2</i>            | 1,10  | 2,04E-02 | 1,22E-01 |
| <i>IL8</i>             | 1,50  | 2,04E-02 | 1,22E-01 |
| <i>A1359819</i>        | 1,08  | 2,04E-02 | 1,22E-01 |
| <i>AA969200</i>        | 1,22  | 2,04E-02 | 1,22E-01 |
| <i>RBMS2</i>           | 1,11  | 2,04E-02 | 1,22E-01 |
| <i>AK095108</i>        | 1,12  | 2,04E-02 | 1,22E-01 |
| <i>IRAK1</i>           | 1,10  | 2,05E-02 | 1,22E-01 |
| <i>A_32_P25809</i>     | -1,09 | 2,05E-02 | 1,22E-01 |
| <i>ERN2</i>            | 1,09  | 2,05E-02 | 1,22E-01 |
| <i>BC082970</i>        | 1,14  | 2,05E-02 | 1,22E-01 |
| <i>A_23_P300563</i>    | 1,13  | 2,05E-02 | 1,22E-01 |
| <i>CSH2</i>            | 1,22  | 2,05E-02 | 1,22E-01 |
| <i>TRMU</i>            | -1,11 | 2,05E-02 | 1,22E-01 |
| <i>BC061590</i>        | 1,09  | 2,05E-02 | 1,22E-01 |
| <i>A_24_P256063</i>    | 1,30  | 2,05E-02 | 1,22E-01 |
| <i>C20orf27</i>        | -1,17 | 2,06E-02 | 1,22E-01 |
| <i>A_24_P204414</i>    | 1,14  | 2,06E-02 | 1,22E-01 |
| <i>C7orf36</i>         | -1,11 | 2,06E-02 | 1,22E-01 |
| <i>THC2407816</i>      | -1,13 | 2,06E-02 | 1,22E-01 |
| <i>ENPP7</i>           | 1,14  | 2,06E-02 | 1,23E-01 |
| <i>THC2416690</i>      | -1,23 | 2,06E-02 | 1,23E-01 |
| <i>THC2417476</i>      | 1,09  | 2,06E-02 | 1,23E-01 |
| <i>A_24_P687465</i>    | 1,21  | 2,06E-02 | 1,23E-01 |
| <i>C19orf36</i>        | -1,13 | 2,07E-02 | 1,23E-01 |
| <i>PAM</i>             | -1,16 | 2,07E-02 | 1,23E-01 |
| <i>TOR3A</i>           | 1,14  | 2,07E-02 | 1,23E-01 |
| <i>AA903779</i>        | 1,10  | 2,07E-02 | 1,23E-01 |
| <i>TPARL</i>           | 1,13  | 2,07E-02 | 1,23E-01 |
| <i>A_24_P927245</i>    | 1,13  | 2,07E-02 | 1,23E-01 |



|                        |       |          |          |
|------------------------|-------|----------|----------|
| <i>GPR162</i>          | 1,15  | 2,07E-02 | 1,23E-01 |
| <i>AK125129</i>        | -1,10 | 2,07E-02 | 1,23E-01 |
| <i>ESCO1</i>           | -1,12 | 2,08E-02 | 1,23E-01 |
| <i>LAPTM4A</i>         | -1,10 | 2,08E-02 | 1,23E-01 |
| <i>C12orf47</i>        | -1,16 | 2,08E-02 | 1,23E-01 |
| <i>AK092559</i>        | -1,11 | 2,08E-02 | 1,23E-01 |
| <i>CR738137</i>        | -1,14 | 2,08E-02 | 1,24E-01 |
| <i>A_24_P924247</i>    | -1,06 | 2,08E-02 | 1,24E-01 |
| <i>KIF3A</i>           | 1,10  | 2,09E-02 | 1,24E-01 |
| <i>CNTN2</i>           | 1,34  | 2,09E-02 | 1,24E-01 |
| <i>CB123670</i>        | 1,45  | 2,09E-02 | 1,24E-01 |
| <i>ZNF114</i>          | -1,13 | 2,09E-02 | 1,24E-01 |
| <i>ALG8</i>            | -1,13 | 2,09E-02 | 1,24E-01 |
| <i>AK022083</i>        | 1,22  | 2,09E-02 | 1,24E-01 |
| <i>BC071773</i>        | -1,29 | 2,09E-02 | 1,24E-01 |
| <i>SNAPC3</i>          | -1,12 | 2,09E-02 | 1,24E-01 |
| <i>THC2435731</i>      | -1,14 | 2,10E-02 | 1,24E-01 |
| <i>A_24_P853004</i>    | 1,11  | 2,09E-02 | 1,24E-01 |
| <i>THC2236555</i>      | 1,12  | 2,10E-02 | 1,24E-01 |
| <i>ENST00000339363</i> | 1,16  | 2,09E-02 | 1,24E-01 |
| <i>GSTA2</i>           | 1,35  | 2,09E-02 | 1,24E-01 |
| <i>ZNF680</i>          | -1,16 | 2,10E-02 | 1,24E-01 |
| <i>THC2309960</i>      | -1,27 | 2,10E-02 | 1,24E-01 |
| <i>SESN1</i>           | -1,16 | 2,10E-02 | 1,24E-01 |
| <i>C9orf77</i>         | 1,09  | 2,10E-02 | 1,24E-01 |
| <i>KCNJ2</i>           | 1,24  | 2,11E-02 | 1,24E-01 |
| <i>YIPF3</i>           | -1,10 | 2,11E-02 | 1,24E-01 |
| <i>KIAA0408</i>        | 1,23  | 2,11E-02 | 1,24E-01 |
| <i>ACVR1B</i>          | 1,08  | 2,11E-02 | 1,24E-01 |
| <i>NUBP2</i>           | 1,09  | 2,11E-02 | 1,24E-01 |
| <i>HEY2</i>            | 1,31  | 2,11E-02 | 1,24E-01 |
| <i>ITGA9</i>           | 1,20  | 2,11E-02 | 1,25E-01 |
| <i>BXDC1</i>           | 1,09  | 2,12E-02 | 1,25E-01 |
| <i>C6orf152</i>        | -1,16 | 2,12E-02 | 1,25E-01 |
| <i>THC2359755</i>      | 1,12  | 2,12E-02 | 1,25E-01 |
| <i>AI824599</i>        | 1,25  | 2,12E-02 | 1,25E-01 |
| <i>LOC284889</i>       | 1,14  | 2,12E-02 | 1,25E-01 |
| <i>TRPM2</i>           | -1,12 | 2,13E-02 | 1,25E-01 |
| <i>CEACAM1</i>         | -1,11 | 2,13E-02 | 1,25E-01 |
| <i>BQ717813</i>        | 1,10  | 2,13E-02 | 1,25E-01 |
| <i>A_32_P182070</i>    | 1,14  | 2,13E-02 | 1,26E-01 |
| <i>AF131777</i>        | -1,23 | 2,14E-02 | 1,26E-01 |
| <i>THC2405842</i>      | -1,13 | 2,14E-02 | 1,26E-01 |
| <i>TCERG1L</i>         | -1,09 | 2,14E-02 | 1,26E-01 |

|                        |       |          |          |
|------------------------|-------|----------|----------|
| <i>ENST00000327669</i> | -1,08 | 2,14E-02 | 1,26E-01 |
| <i>SCRIB</i>           | -1,07 | 2,14E-02 | 1,26E-01 |
| <i>CLMN</i>            | 1,18  | 2,14E-02 | 1,26E-01 |
| <i>BC040628</i>        | -1,10 | 2,14E-02 | 1,26E-01 |
| <i>MYO15A</i>          | -1,11 | 2,14E-02 | 1,26E-01 |
| <i>ATF4</i>            | 1,14  | 2,14E-02 | 1,26E-01 |
| <i>PDZD7</i>           | -1,12 | 2,14E-02 | 1,26E-01 |
| <i>A_24_P161068</i>    | 1,20  | 2,15E-02 | 1,26E-01 |
| <i>ABCC5</i>           | -1,10 | 2,15E-02 | 1,26E-01 |
| <i>ATXN1</i>           | 1,11  | 2,15E-02 | 1,26E-01 |
| <i>AL079294</i>        | -1,16 | 2,15E-02 | 1,26E-01 |
| <i>ZBTB7B</i>          | 1,09  | 2,15E-02 | 1,26E-01 |
| <i>FUT8</i>            | 1,14  | 2,15E-02 | 1,26E-01 |
| <i>PRKCG</i>           | 1,08  | 2,15E-02 | 1,26E-01 |
| <i>TRPC5</i>           | 1,10  | 2,16E-02 | 1,26E-01 |
| <i>AA974271</i>        | 1,10  | 2,16E-02 | 1,27E-01 |
| <i>AF103312</i>        | -1,42 | 2,16E-02 | 1,27E-01 |
| <i>BE671816</i>        | 1,10  | 2,16E-02 | 1,27E-01 |
| <i>BC018676</i>        | 1,13  | 2,16E-02 | 1,27E-01 |
| <i>ENST00000290390</i> | -1,15 | 2,16E-02 | 1,27E-01 |
| <i>A_24_P186746</i>    | 1,28  | 2,16E-02 | 1,27E-01 |
| <i>A_24_P578641</i>    | 1,16  | 2,16E-02 | 1,27E-01 |
| <i>THC2317110</i>      | -1,15 | 2,17E-02 | 1,27E-01 |
| <i>AA747799</i>        | -1,13 | 2,17E-02 | 1,27E-01 |
| <i>ZFP90</i>           | -1,10 | 2,17E-02 | 1,27E-01 |
| <i>A_23_P96262</i>     | 1,09  | 2,17E-02 | 1,27E-01 |
| <i>A_24_P119115</i>    | 1,09  | 2,17E-02 | 1,27E-01 |
| <i>H2AFJ</i>           | 1,09  | 2,17E-02 | 1,27E-01 |
| <i>DUSP2</i>           | 1,36  | 2,17E-02 | 1,27E-01 |
| <i>BZW1</i>            | 1,09  | 2,17E-02 | 1,27E-01 |
| <i>BE221781</i>        | 1,10  | 2,17E-02 | 1,27E-01 |
| <i>ENST00000379986</i> | 1,12  | 2,17E-02 | 1,27E-01 |
| <i>A_24_P612921</i>    | 1,08  | 2,17E-02 | 1,27E-01 |
| <i>PNMA2</i>           | -1,23 | 2,17E-02 | 1,27E-01 |
| <i>AF020645</i>        | -1,08 | 2,17E-02 | 1,27E-01 |
| <i>CEP57</i>           | -1,09 | 2,17E-02 | 1,27E-01 |
| <i>FA2H</i>            | 1,30  | 2,17E-02 | 1,27E-01 |
| <i>THC2340734</i>      | -1,18 | 2,18E-02 | 1,27E-01 |
| <i>RBM26</i>           | -1,08 | 2,18E-02 | 1,27E-01 |
| <i>THC2262874</i>      | -1,09 | 2,18E-02 | 1,27E-01 |
| <i>UTF1</i>            | 1,13  | 2,18E-02 | 1,27E-01 |
| <i>A_24_P679796</i>    | 1,17  | 2,18E-02 | 1,27E-01 |
| <i>AY998685</i>        | -1,39 | 2,18E-02 | 1,27E-01 |
| <i>ENST00000338146</i> | -1,09 | 2,18E-02 | 1,27E-01 |

|                        |       |          |          |
|------------------------|-------|----------|----------|
| <i>R7BP</i>            | 1,16  | 2,18E-02 | 1,27E-01 |
| <i>THC2408398</i>      | -1,17 | 2,19E-02 | 1,27E-01 |
| <i>NOPE</i>            | -1,15 | 2,18E-02 | 1,27E-01 |
| <i>SKIV2L2</i>         | -1,07 | 2,18E-02 | 1,27E-01 |
| <i>UBE2J2</i>          | 1,06  | 2,19E-02 | 1,27E-01 |
| <i>CN364769</i>        | -1,10 | 2,19E-02 | 1,28E-01 |
| <i>THC2435128</i>      | -1,19 | 2,19E-02 | 1,28E-01 |
| <i>HEBP2</i>           | 1,10  | 2,19E-02 | 1,28E-01 |
| <i>HOXA13</i>          | -1,20 | 2,19E-02 | 1,28E-01 |
| <i>FOLR1</i>           | -1,15 | 2,19E-02 | 1,28E-01 |
| <i>A_23_P120644</i>    | 1,19  | 2,19E-02 | 1,28E-01 |
| <i>TAF1A</i>           | -1,12 | 2,20E-02 | 1,28E-01 |
| <i>BRD1</i>            | -1,11 | 2,20E-02 | 1,28E-01 |
| <i>CXCL2</i>           | 2,02  | 2,20E-02 | 1,28E-01 |
| <i>A_24_P537149</i>    | 1,11  | 2,20E-02 | 1,28E-01 |
| <i>C16orf53</i>        | -1,17 | 2,21E-02 | 1,28E-01 |
| <i>SHB</i>             | 1,16  | 2,21E-02 | 1,28E-01 |
| <i>C10orf82</i>        | 1,35  | 2,21E-02 | 1,28E-01 |
| <i>THC2440554</i>      | 1,28  | 2,21E-02 | 1,28E-01 |
| <i>37135</i>           | -1,10 | 2,21E-02 | 1,28E-01 |
| <i>UPF3A</i>           | -1,09 | 2,21E-02 | 1,29E-01 |
| <i>AK057787</i>        | -1,15 | 2,22E-02 | 1,29E-01 |
| <i>DKFZp547H025</i>    | 1,12  | 2,22E-02 | 1,29E-01 |
| <i>C8orf57</i>         | -1,15 | 2,22E-02 | 1,29E-01 |
| <i>A_23_P126560</i>    | 1,08  | 2,22E-02 | 1,29E-01 |
| <i>THC2281053</i>      | -1,13 | 2,22E-02 | 1,29E-01 |
| <i>LARP4</i>           | 1,09  | 2,22E-02 | 1,29E-01 |
| <i>A_24_P944582</i>    | 1,11  | 2,22E-02 | 1,29E-01 |
| <i>THC2288599</i>      | 1,21  | 2,23E-02 | 1,29E-01 |
| <i>ENST00000332534</i> | 1,19  | 2,23E-02 | 1,29E-01 |
| <i>ENST00000336749</i> | 1,43  | 2,23E-02 | 1,29E-01 |
| <i>A_32_P69441</i>     | -1,25 | 2,23E-02 | 1,29E-01 |
| <i>THC2443199</i>      | -1,15 | 2,23E-02 | 1,29E-01 |
| <i>RPS3A</i>           | -1,09 | 2,23E-02 | 1,29E-01 |
| <i>THC2290380</i>      | -1,08 | 2,23E-02 | 1,29E-01 |
| <i>BE222825</i>        | 1,12  | 2,23E-02 | 1,29E-01 |
| <i>ZDHHC2</i>          | 1,16  | 2,23E-02 | 1,29E-01 |
| <i>M31157</i>          | 1,40  | 2,23E-02 | 1,29E-01 |
| <i>AK022015</i>        | -1,11 | 2,24E-02 | 1,30E-01 |
| <i>THC2278725</i>      | 1,10  | 2,24E-02 | 1,30E-01 |
| <i>HECW2</i>           | 1,14  | 2,24E-02 | 1,30E-01 |
| <i>TNFSF14</i>         | -1,25 | 2,24E-02 | 1,30E-01 |
| <i>FAM18B</i>          | -1,15 | 2,24E-02 | 1,30E-01 |
| <i>ENST00000366872</i> | 1,15  | 2,24E-02 | 1,30E-01 |

|                        |       |          |          |
|------------------------|-------|----------|----------|
| <i>ENAH</i>            | 1,19  | 2,24E-02 | 1,30E-01 |
| <i>A_24_P169843</i>    | 1,21  | 2,24E-02 | 1,30E-01 |
| <i>GTL3</i>            | 1,16  | 2,24E-02 | 1,30E-01 |
| <i>THC2439399</i>      | -1,13 | 2,24E-02 | 1,30E-01 |
| <i>ENST00000380195</i> | 1,16  | 2,24E-02 | 1,30E-01 |
| <i>A_24_P612656</i>    | -1,09 | 2,24E-02 | 1,30E-01 |
| <i>AFF4</i>            | 1,07  | 2,24E-02 | 1,30E-01 |
| <i>POSTN</i>           | 1,48  | 2,25E-02 | 1,30E-01 |
| <i>AF305816</i>        | -1,12 | 2,25E-02 | 1,30E-01 |
| <i>THC2448537</i>      | -1,17 | 2,25E-02 | 1,30E-01 |
| <i>POMT2</i>           | -1,07 | 2,25E-02 | 1,30E-01 |
| <i>BEX1</i>            | -1,26 | 2,25E-02 | 1,30E-01 |
| <i>PDLIM2</i>          | -1,10 | 2,25E-02 | 1,30E-01 |
| <i>SLC14A2</i>         | 1,08  | 2,25E-02 | 1,30E-01 |
| <i>ARIH1</i>           | 1,09  | 2,25E-02 | 1,30E-01 |
| <i>LOC51057</i>        | 1,09  | 2,25E-02 | 1,30E-01 |
| <i>NRP1</i>            | 1,11  | 2,25E-02 | 1,30E-01 |
| <i>AK123248</i>        | 1,17  | 2,25E-02 | 1,30E-01 |
| <i>KLF2</i>            | 1,41  | 2,25E-02 | 1,30E-01 |
| <i>MYO5B</i>           | 1,63  | 2,25E-02 | 1,30E-01 |
| <i>AF119853</i>        | -1,12 | 2,25E-02 | 1,30E-01 |
| <i>SPATA6</i>          | 1,14  | 2,25E-02 | 1,30E-01 |
| <i>CCDC68</i>          | -1,19 | 2,26E-02 | 1,30E-01 |
| <i>SS18L2</i>          | -1,10 | 2,26E-02 | 1,30E-01 |
| <i>LOC221272</i>       | -1,10 | 2,26E-02 | 1,30E-01 |
| <i>WDR37</i>           | -1,10 | 2,26E-02 | 1,30E-01 |
| <i>ASCL2</i>           | -1,14 | 2,26E-02 | 1,30E-01 |
| <i>TRIM15</i>          | 1,07  | 2,26E-02 | 1,30E-01 |
| <i>TMEM79</i>          | -1,30 | 2,26E-02 | 1,30E-01 |
| <i>MPFL</i>            | 1,10  | 2,26E-02 | 1,30E-01 |
| <i>AF161353</i>        | -1,11 | 2,26E-02 | 1,30E-01 |
| <i>ENST00000373464</i> | 1,07  | 2,26E-02 | 1,30E-01 |
| <i>RARA</i>            | 1,11  | 2,26E-02 | 1,30E-01 |
| <i>PIGC</i>            | -1,09 | 2,27E-02 | 1,30E-01 |
| <i>RPA1</i>            | -1,13 | 2,27E-02 | 1,31E-01 |
| <i>A_24_P650011</i>    | -1,14 | 2,27E-02 | 1,31E-01 |
| <i>FARP2</i>           | 1,08  | 2,27E-02 | 1,31E-01 |
| <i>EPHA3</i>           | 1,26  | 2,27E-02 | 1,31E-01 |
| <i>BG182941</i>        | 1,15  | 2,27E-02 | 1,31E-01 |
| <i>C11orf9</i>         | 1,11  | 2,27E-02 | 1,31E-01 |
| <i>A_24_P358302</i>    | 1,13  | 2,28E-02 | 1,31E-01 |
| <i>ITIH4</i>           | 1,27  | 2,28E-02 | 1,31E-01 |
| <i>CORO2B</i>          | -1,13 | 2,28E-02 | 1,31E-01 |
| <i>THC2341944</i>      | -1,13 | 2,28E-02 | 1,31E-01 |

|                        |       |          |          |
|------------------------|-------|----------|----------|
| <i>C15orf24</i>        | 1,07  | 2,28E-02 | 1,31E-01 |
| <i>C12orf52</i>        | -1,11 | 2,28E-02 | 1,31E-01 |
| <i>PLCXD2</i>          | 1,12  | 2,28E-02 | 1,31E-01 |
| <i>TCEAL1</i>          | -1,11 | 2,28E-02 | 1,31E-01 |
| <i>TUBA6</i>           | 1,18  | 2,28E-02 | 1,31E-01 |
| <i>CTSZ</i>            | 1,14  | 2,28E-02 | 1,31E-01 |
| <i>LCE1D</i>           | 1,11  | 2,28E-02 | 1,31E-01 |
| <i>TAF4</i>            | -1,18 | 2,29E-02 | 1,31E-01 |
| <i>MAT2B</i>           | -1,13 | 2,29E-02 | 1,31E-01 |
| <i>HCP1</i>            | -1,10 | 2,29E-02 | 1,31E-01 |
| <i>C1orf56</i>         | 1,10  | 2,29E-02 | 1,32E-01 |
| <i>SLC38A2</i>         | -1,15 | 2,30E-02 | 1,32E-01 |
| <i>RNF139</i>          | 1,11  | 2,30E-02 | 1,32E-01 |
| <i>BE091362</i>        | -1,11 | 2,30E-02 | 1,32E-01 |
| <i>THC2290786</i>      | -1,16 | 2,30E-02 | 1,32E-01 |
| <i>ENST00000320054</i> | 1,10  | 2,30E-02 | 1,32E-01 |
| <i>PDE3B</i>           | 1,33  | 2,30E-02 | 1,32E-01 |
| <i>ENST00000308092</i> | -1,13 | 2,30E-02 | 1,32E-01 |
| <i>THC2267409</i>      | 1,11  | 2,30E-02 | 1,32E-01 |
| <i>A_32_P885445</i>    | 1,08  | 2,30E-02 | 1,32E-01 |
| <i>THC2405019</i>      | -1,15 | 2,31E-02 | 1,32E-01 |
| <i>CSHL1</i>           | 1,12  | 2,31E-02 | 1,32E-01 |
| <i>A_24_P75688</i>     | 1,12  | 2,31E-02 | 1,32E-01 |
| <i>FAM50A</i>          | 1,11  | 2,31E-02 | 1,32E-01 |
| <i>ENST00000340855</i> | 1,12  | 2,31E-02 | 1,32E-01 |
| <i>LOC124976</i>       | 1,25  | 2,31E-02 | 1,32E-01 |
| <i>FLJ12078</i>        | -1,09 | 2,31E-02 | 1,32E-01 |
| <i>ENST00000309874</i> | -1,12 | 2,31E-02 | 1,32E-01 |
| <i>A_32_P113845</i>    | -1,09 | 2,31E-02 | 1,32E-01 |
| <i>BC039374</i>        | -1,12 | 2,32E-02 | 1,32E-01 |
| <i>THC2279840</i>      | -1,12 | 2,32E-02 | 1,32E-01 |
| <i>SMCR8</i>           | -1,10 | 2,32E-02 | 1,32E-01 |
| <i>C19orf25</i>        | -1,09 | 2,32E-02 | 1,32E-01 |
| <i>RPL7A</i>           | -1,08 | 2,32E-02 | 1,32E-01 |
| <i>THC2333687</i>      | -1,07 | 2,32E-02 | 1,32E-01 |
| <i>CCNC</i>            | 1,10  | 2,32E-02 | 1,32E-01 |
| <i>THC2272102</i>      | 1,11  | 2,32E-02 | 1,32E-01 |
| <i>THC2287287</i>      | 1,10  | 2,32E-02 | 1,32E-01 |
| <i>GRM3</i>            | -1,10 | 2,32E-02 | 1,32E-01 |
| <i>RNF180</i>          | 1,13  | 2,32E-02 | 1,32E-01 |
| <i>AA043564</i>        | 1,27  | 2,32E-02 | 1,32E-01 |
| <i>CXorf58</i>         | 1,07  | 2,32E-02 | 1,32E-01 |
| <i>ADAMTS6</i>         | 1,14  | 2,32E-02 | 1,32E-01 |
| <i>ALKBH1</i>          | -1,11 | 2,33E-02 | 1,32E-01 |

|                        |       |          |          |
|------------------------|-------|----------|----------|
| <i>IFNG</i>            | -1,22 | 2,33E-02 | 1,32E-01 |
| <i>AK097332</i>        | 1,09  | 2,33E-02 | 1,32E-01 |
| <i>THC2301362</i>      | -1,16 | 2,33E-02 | 1,33E-01 |
| <i>TMEM97</i>          | -1,11 | 2,33E-02 | 1,33E-01 |
| <i>ODF1</i>            | -1,07 | 2,33E-02 | 1,33E-01 |
| <i>THC2363476</i>      | -1,09 | 2,33E-02 | 1,33E-01 |
| <i>PLSCR4</i>          | -1,19 | 2,33E-02 | 1,33E-01 |
| <i>MRPS34</i>          | -1,08 | 2,33E-02 | 1,33E-01 |
| <i>SAP30L</i>          | 1,09  | 2,33E-02 | 1,33E-01 |
| <i>C13orf23</i>        | -1,10 | 2,33E-02 | 1,33E-01 |
| <i>TST</i>             | -1,17 | 2,34E-02 | 1,33E-01 |
| <i>AF070529</i>        | 1,14  | 2,34E-02 | 1,33E-01 |
| <i>LRRC45</i>          | 1,12  | 2,34E-02 | 1,33E-01 |
| <i>AJ245002</i>        | -1,47 | 2,34E-02 | 1,33E-01 |
| <i>MMACHC</i>          | -1,19 | 2,34E-02 | 1,33E-01 |
| <i>ZNF527</i>          | -1,13 | 2,34E-02 | 1,33E-01 |
| <i>AW864881</i>        | -1,11 | 2,34E-02 | 1,33E-01 |
| <i>BC031957</i>        | -1,10 | 2,34E-02 | 1,33E-01 |
| <i>THC2384571</i>      | 1,13  | 2,34E-02 | 1,33E-01 |
| <i>TYMS</i>            | -1,25 | 2,34E-02 | 1,33E-01 |
| <i>AW851396</i>        | -1,12 | 2,34E-02 | 1,33E-01 |
| <i>BEXL1</i>           | -1,09 | 2,34E-02 | 1,33E-01 |
| <i>LOC375748</i>       | 1,09  | 2,34E-02 | 1,33E-01 |
| <i>LAIR1</i>           | -1,18 | 2,35E-02 | 1,33E-01 |
| <i>FLJ40504</i>        | 1,34  | 2,35E-02 | 1,33E-01 |
| <i>ENST00000285383</i> | 1,07  | 2,35E-02 | 1,33E-01 |
| <i>CR602592</i>        | -1,16 | 2,35E-02 | 1,33E-01 |
| <i>A_24_P204574</i>    | -1,88 | 2,35E-02 | 1,33E-01 |
| <i>LTB</i>             | -1,31 | 2,35E-02 | 1,33E-01 |
| <i>APEX1</i>           | -1,10 | 2,35E-02 | 1,33E-01 |
| <i>ENST00000379855</i> | 1,08  | 2,35E-02 | 1,33E-01 |
| <i>CECR2</i>           | 1,12  | 2,35E-02 | 1,33E-01 |
| <i>CXCL16</i>          | 1,13  | 2,35E-02 | 1,33E-01 |
| <i>RPL23A</i>          | -1,08 | 2,36E-02 | 1,33E-01 |
| <i>AI431972</i>        | 1,10  | 2,36E-02 | 1,33E-01 |
| <i>A_24_P584463</i>    | 1,30  | 2,36E-02 | 1,33E-01 |
| <i>VGLL4</i>           | 1,10  | 2,36E-02 | 1,33E-01 |
| <i>FAM119B</i>         | -1,07 | 2,36E-02 | 1,34E-01 |
| <i>SMAD9</i>           | 1,19  | 2,36E-02 | 1,34E-01 |
| <i>LOC554207</i>       | 1,07  | 2,36E-02 | 1,34E-01 |
| <i>THC2305336</i>      | -1,27 | 2,36E-02 | 1,34E-01 |
| <i>CLDN3</i>           | 1,06  | 2,36E-02 | 1,34E-01 |
| <i>ACVRL1</i>          | 1,13  | 2,37E-02 | 1,34E-01 |
| <i>HDGFRP3</i>         | 1,10  | 2,37E-02 | 1,34E-01 |

|                 |       |          |          |
|-----------------|-------|----------|----------|
| AK056771        | 1,10  | 2,37E-02 | 1,34E-01 |
| ENST00000303979 | 1,21  | 2,37E-02 | 1,34E-01 |
| ANKH            | 1,10  | 2,37E-02 | 1,34E-01 |
| A_24_P230466    | 1,29  | 2,37E-02 | 1,34E-01 |
| AY358103        | -1,18 | 2,37E-02 | 1,34E-01 |
| BC042520        | -1,13 | 2,37E-02 | 1,34E-01 |
| LOC387911       | -1,12 | 2,37E-02 | 1,34E-01 |
| HNRPC           | -1,07 | 2,37E-02 | 1,34E-01 |
| THC2335575      | 1,08  | 2,37E-02 | 1,34E-01 |
| AI732190        | 1,09  | 2,37E-02 | 1,34E-01 |
| MGC4268         | 1,09  | 2,37E-02 | 1,34E-01 |
| A_23_P66347     | 1,23  | 2,37E-02 | 1,34E-01 |
| ZNF644          | 1,08  | 2,37E-02 | 1,34E-01 |
| INPP5D          | -1,16 | 2,38E-02 | 1,34E-01 |
| TNFAIP6         | 1,94  | 2,38E-02 | 1,34E-01 |
| AK094415        | -1,09 | 2,38E-02 | 1,34E-01 |
| BC022233        | 1,25  | 2,38E-02 | 1,34E-01 |
| USP6NL          | 1,09  | 2,38E-02 | 1,34E-01 |
| ADH6            | -1,17 | 2,38E-02 | 1,34E-01 |
| ENST00000260045 | -1,08 | 2,38E-02 | 1,34E-01 |
| COL9A3          | 1,31  | 2,38E-02 | 1,34E-01 |
| BRD4            | 1,07  | 2,39E-02 | 1,34E-01 |
| B3GNT7          | 1,07  | 2,39E-02 | 1,34E-01 |
| FN3K            | 1,11  | 2,39E-02 | 1,34E-01 |
| CNTNAP4         | -1,23 | 2,39E-02 | 1,34E-01 |
| AF038185        | 1,13  | 2,39E-02 | 1,34E-01 |
| CCDC74B         | -1,21 | 2,39E-02 | 1,34E-01 |
| THC2381535      | -1,29 | 2,39E-02 | 1,34E-01 |
| DEPDC2          | 1,14  | 2,39E-02 | 1,34E-01 |
| A_24_P877411    | 1,09  | 2,39E-02 | 1,34E-01 |
| LOC647106       | -1,11 | 2,39E-02 | 1,35E-01 |
| TEAD4           | 1,13  | 2,40E-02 | 1,35E-01 |
| CR602022        | -1,11 | 2,40E-02 | 1,35E-01 |
| THC2282972      | -1,18 | 2,40E-02 | 1,35E-01 |
| MGC20470        | -1,14 | 2,40E-02 | 1,35E-01 |
| AL833099        | -1,11 | 2,40E-02 | 1,35E-01 |
| ZNF70           | -1,10 | 2,40E-02 | 1,35E-01 |
| THC2428956      | -1,25 | 2,40E-02 | 1,35E-01 |
| OSGEPL1         | -1,18 | 2,40E-02 | 1,35E-01 |
| ENST00000379156 | -1,10 | 2,40E-02 | 1,35E-01 |
| PTHR2           | -1,09 | 2,40E-02 | 1,35E-01 |
| C16orf74        | -1,16 | 2,40E-02 | 1,35E-01 |
| BF195626        | -1,11 | 2,41E-02 | 1,35E-01 |
| AK125269        | -1,12 | 2,41E-02 | 1,35E-01 |

|                        |       |          |          |
|------------------------|-------|----------|----------|
| <i>YIPF5</i>           | -1,07 | 2,41E-02 | 1,35E-01 |
| <i>THC2409354</i>      | -1,09 | 2,41E-02 | 1,35E-01 |
| <i>ZNFN1A3</i>         | -1,11 | 2,41E-02 | 1,35E-01 |
| <i>SLC36A4</i>         | 1,08  | 2,41E-02 | 1,35E-01 |
| <i>ENST00000311275</i> | -1,13 | 2,42E-02 | 1,35E-01 |
| <i>GPIAP1</i>          | -1,06 | 2,42E-02 | 1,35E-01 |
| <i>SEPHS1</i>          | 1,08  | 2,42E-02 | 1,35E-01 |
| <i>D37933</i>          | 1,10  | 2,42E-02 | 1,35E-01 |
| <i>OR11A1</i>          | 1,14  | 2,42E-02 | 1,35E-01 |
| <i>SELP</i>            | 1,25  | 2,42E-02 | 1,35E-01 |
| <i>GPNMB</i>           | -1,20 | 2,42E-02 | 1,35E-01 |
| <i>A_24_P101426</i>    | -1,08 | 2,42E-02 | 1,35E-01 |
| <i>ENST00000367385</i> | 1,13  | 2,42E-02 | 1,35E-01 |
| <i>RASGRP1</i>         | -1,12 | 2,42E-02 | 1,35E-01 |
| <i>CHCHD3</i>          | 1,08  | 2,42E-02 | 1,35E-01 |
| <i>AF075063</i>        | -1,23 | 2,42E-02 | 1,35E-01 |
| <i>CR610205</i>        | -1,13 | 2,42E-02 | 1,35E-01 |
| <i>HSD11B1</i>         | 1,29  | 2,42E-02 | 1,35E-01 |
| <i>A_24_P930180</i>    | 1,11  | 2,43E-02 | 1,36E-01 |
| <i>S67659</i>          | 1,19  | 2,43E-02 | 1,36E-01 |
| <i>NME6</i>            | -1,11 | 2,43E-02 | 1,36E-01 |
| <i>THC2284189</i>      | -1,10 | 2,43E-02 | 1,36E-01 |
| <i>PRO1580</i>         | -1,09 | 2,43E-02 | 1,36E-01 |
| <i>ARD1A</i>           | 1,09  | 2,43E-02 | 1,36E-01 |
| <i>ING1</i>            | 1,17  | 2,43E-02 | 1,36E-01 |
| <i>ELOVL7</i>          | 1,20  | 2,43E-02 | 1,36E-01 |
| <i>ENST00000377553</i> | 1,09  | 2,43E-02 | 1,36E-01 |
| <i>CCDC85B</i>         | 1,09  | 2,43E-02 | 1,36E-01 |
| <i>ATP8A1</i>          | 1,14  | 2,43E-02 | 1,36E-01 |
| <i>ARSI</i>            | 1,23  | 2,43E-02 | 1,36E-01 |
| <i>tcag7.1017</i>      | -1,07 | 2,43E-02 | 1,36E-01 |
| <i>SELK</i>            | 1,11  | 2,44E-02 | 1,36E-01 |
| <i>GBE1</i>            | 1,14  | 2,44E-02 | 1,36E-01 |
| <i>PRC1</i>            | 1,14  | 2,44E-02 | 1,36E-01 |
| <i>AF075035</i>        | -1,14 | 2,44E-02 | 1,36E-01 |
| <i>MAN2A1</i>          | 1,11  | 2,44E-02 | 1,36E-01 |
| <i>LOC653316</i>       | -1,18 | 2,44E-02 | 1,36E-01 |
| <i>MANEAL</i>          | -1,12 | 2,45E-02 | 1,36E-01 |
| <i>AJ420543</i>        | 1,13  | 2,45E-02 | 1,36E-01 |
| <i>CXCL12</i>          | -1,17 | 2,45E-02 | 1,36E-01 |
| <i>NQO2</i>            | 1,11  | 2,45E-02 | 1,36E-01 |
| <i>HEYL</i>            | 1,30  | 2,45E-02 | 1,36E-01 |
| <i>C4orf18</i>         | 1,21  | 2,45E-02 | 1,36E-01 |
| <i>AI825645</i>        | 1,10  | 2,45E-02 | 1,36E-01 |



|                        |       |          |          |
|------------------------|-------|----------|----------|
| <i>FAM71A</i>          | 1,26  | 2,45E-02 | 1,36E-01 |
| <i>ANAPC4</i>          | -1,09 | 2,45E-02 | 1,36E-01 |
| <i>EXOC5</i>           | 1,11  | 2,46E-02 | 1,37E-01 |
| <i>C15orf44</i>        | -1,07 | 2,46E-02 | 1,37E-01 |
| <i>PDE4B</i>           | 1,36  | 2,46E-02 | 1,37E-01 |
| <i>GDF3</i>            | 1,11  | 2,46E-02 | 1,37E-01 |
| <i>THC2367544</i>      | 1,20  | 2,46E-02 | 1,37E-01 |
| <i>BC046476</i>        | -1,08 | 2,46E-02 | 1,37E-01 |
| <i>CETN3</i>           | -1,11 | 2,46E-02 | 1,37E-01 |
| <i>DPP9</i>            | 1,08  | 2,46E-02 | 1,37E-01 |
| <i>TFB2M</i>           | -1,08 | 2,47E-02 | 1,37E-01 |
| <i>AF305822</i>        | 1,09  | 2,47E-02 | 1,37E-01 |
| <i>AK022424</i>        | 1,11  | 2,47E-02 | 1,37E-01 |
| <i>ETV6</i>            | 1,12  | 2,47E-02 | 1,37E-01 |
| <i>AF130064</i>        | 1,07  | 2,47E-02 | 1,37E-01 |
| <i>UCHL5</i>           | 1,08  | 2,47E-02 | 1,37E-01 |
| <i>A_32_P37943</i>     | 1,17  | 2,47E-02 | 1,37E-01 |
| <i>RALB</i>            | 1,18  | 2,47E-02 | 1,37E-01 |
| <i>THC2442514</i>      | 1,38  | 2,48E-02 | 1,37E-01 |
| <i>MYO10</i>           | 1,15  | 2,48E-02 | 1,37E-01 |
| <i>TEX261</i>          | -1,07 | 2,48E-02 | 1,37E-01 |
| <i>THC2440818</i>      | 1,13  | 2,48E-02 | 1,37E-01 |
| <i>THC2429818</i>      | -1,07 | 2,48E-02 | 1,37E-01 |
| <i>THC2407230</i>      | 1,12  | 2,48E-02 | 1,37E-01 |
| <i>LOC652147</i>       | 1,11  | 2,48E-02 | 1,37E-01 |
| <i>CD55</i>            | 1,35  | 2,48E-02 | 1,37E-01 |
| <i>PIN4</i>            | -1,15 | 2,48E-02 | 1,38E-01 |
| <i>ZZZ3</i>            | -1,15 | 2,49E-02 | 1,38E-01 |
| <i>THC2300222</i>      | -1,13 | 2,49E-02 | 1,38E-01 |
| <i>APOL3</i>           | -1,11 | 2,49E-02 | 1,38E-01 |
| <i>A_24_P315674</i>    | -1,10 | 2,49E-02 | 1,38E-01 |
| <i>MGC42105</i>        | 1,19  | 2,49E-02 | 1,38E-01 |
| <i>BC015213</i>        | -1,07 | 2,49E-02 | 1,38E-01 |
| <i>WDR3</i>            | -1,13 | 2,49E-02 | 1,38E-01 |
| <i>A_32_P106246</i>    | -1,07 | 2,49E-02 | 1,38E-01 |
| <i>ENST00000095634</i> | 1,10  | 2,49E-02 | 1,38E-01 |
| <i>KCNK1</i>           | -1,41 | 2,49E-02 | 1,38E-01 |
| <i>KPNA5</i>           | 1,11  | 2,49E-02 | 1,38E-01 |
| <i>RABGGTA</i>         | 1,09  | 2,50E-02 | 1,38E-01 |
| <i>ELAVL1</i>          | -1,09 | 2,50E-02 | 1,38E-01 |
| <i>A_32_P67355</i>     | 1,14  | 2,50E-02 | 1,38E-01 |
| <i>BC037919</i>        | 1,23  | 2,50E-02 | 1,38E-01 |
| <i>C6orf182</i>        | 1,08  | 2,50E-02 | 1,38E-01 |
| <i>MVK</i>             | -1,11 | 2,50E-02 | 1,38E-01 |

|                     |       |          |          |
|---------------------|-------|----------|----------|
| <i>HNRPU</i>        | 1,07  | 2,51E-02 | 1,38E-01 |
| <i>AL832540</i>     | -1,14 | 2,51E-02 | 1,38E-01 |
| <i>AK001083</i>     | -1,10 | 2,51E-02 | 1,38E-01 |
| <i>ITGB2</i>        | -1,21 | 2,51E-02 | 1,38E-01 |
| <i>NUP160</i>       | -1,09 | 2,51E-02 | 1,38E-01 |
| <i>THC2391454</i>   | -1,21 | 2,51E-02 | 1,38E-01 |
| <i>LARP1</i>        | -1,07 | 2,51E-02 | 1,38E-01 |
| <i>STON2</i>        | 1,12  | 2,51E-02 | 1,38E-01 |
| <i>ADAM19</i>       | 1,17  | 2,51E-02 | 1,38E-01 |
| <i>THC2335955</i>   | -1,16 | 2,51E-02 | 1,38E-01 |
| <i>IMP3</i>         | -1,11 | 2,51E-02 | 1,38E-01 |
| <i>A_24_P306614</i> | 1,12  | 2,51E-02 | 1,38E-01 |
| <i>THC2342544</i>   | -1,13 | 2,52E-02 | 1,38E-01 |
| <i>TMEM63B</i>      | 1,08  | 2,52E-02 | 1,38E-01 |
| <i>CBS</i>          | -1,38 | 2,52E-02 | 1,38E-01 |
| <i>A_24_P148263</i> | -1,18 | 2,52E-02 | 1,38E-01 |
| <i>THC2376553</i>   | -1,12 | 2,52E-02 | 1,39E-01 |
| <i>ZNF502</i>       | -1,12 | 2,52E-02 | 1,39E-01 |
| <i>CYB5A</i>        | -1,09 | 2,52E-02 | 1,39E-01 |
| <i>STAT1</i>        | -1,11 | 2,52E-02 | 1,39E-01 |
| <i>AK057443</i>     | -1,11 | 2,52E-02 | 1,39E-01 |
| <i>HNRPLL</i>       | 1,08  | 2,52E-02 | 1,39E-01 |
| <i>LOC644276</i>    | 1,13  | 2,52E-02 | 1,39E-01 |
| <i>MSI2</i>         | 1,13  | 2,52E-02 | 1,39E-01 |
| <i>MAST4</i>        | 1,14  | 2,52E-02 | 1,39E-01 |
| <i>A_24_P332780</i> | 1,28  | 2,52E-02 | 1,39E-01 |
| <i>ZMYM5</i>        | 1,08  | 2,53E-02 | 1,39E-01 |
| <i>DLX6</i>         | 1,08  | 2,53E-02 | 1,39E-01 |
| <i>LRRTM2</i>       | 1,11  | 2,53E-02 | 1,39E-01 |
| <i>A_32_P208856</i> | -1,08 | 2,53E-02 | 1,39E-01 |
| <i>PRKRIR</i>       | -1,11 | 2,53E-02 | 1,39E-01 |
| <i>GTF2I</i>        | -1,10 | 2,53E-02 | 1,39E-01 |
| <i>R43026</i>       | -1,07 | 2,53E-02 | 1,39E-01 |
| <i>USP21</i>        | -1,09 | 2,54E-02 | 1,39E-01 |
| <i>A_23_P142395</i> | -1,15 | 2,54E-02 | 1,39E-01 |
| <i>SLC6A20</i>      | -1,08 | 2,54E-02 | 1,39E-01 |
| <i>ZNF628</i>       | 1,10  | 2,54E-02 | 1,39E-01 |
| <i>THC2430775</i>   | 1,13  | 2,54E-02 | 1,39E-01 |
| <i>CDH5</i>         | 1,14  | 2,54E-02 | 1,39E-01 |
| <i>A_24_P307046</i> | 1,16  | 2,54E-02 | 1,39E-01 |
| <i>TMEM55A</i>      | -1,16 | 2,55E-02 | 1,39E-01 |
| <i>SPEN</i>         | -1,08 | 2,54E-02 | 1,39E-01 |
| <i>PSMD10</i>       | -1,16 | 2,55E-02 | 1,39E-01 |
| <i>FLJ12547</i>     | 1,11  | 2,55E-02 | 1,40E-01 |

|                        |       |          |          |
|------------------------|-------|----------|----------|
| <i>GALK2</i>           | 1,08  | 2,55E-02 | 1,40E-01 |
| <i>CEND1</i>           | 1,10  | 2,55E-02 | 1,40E-01 |
| <i>ZNF23</i>           | -1,09 | 2,56E-02 | 1,40E-01 |
| <i>INPP1</i>           | 1,17  | 2,56E-02 | 1,40E-01 |
| <i>C14orf78</i>        | -1,13 | 2,56E-02 | 1,40E-01 |
| <i>ZFYVE27</i>         | -1,10 | 2,56E-02 | 1,40E-01 |
| <i>NR1H3</i>           | -1,26 | 2,56E-02 | 1,40E-01 |
| <i>CORO6</i>           | 1,16  | 2,56E-02 | 1,40E-01 |
| <i>MRPS28</i>          | 1,07  | 2,57E-02 | 1,40E-01 |
| <i>ENST00000381046</i> | -1,11 | 2,57E-02 | 1,40E-01 |
| <i>NETO2</i>           | 1,13  | 2,57E-02 | 1,40E-01 |
| <i>BC019599</i>        | -1,11 | 2,57E-02 | 1,40E-01 |
| <i>A_24_P50057</i>     | 1,19  | 2,57E-02 | 1,40E-01 |
| <i>CPLX1</i>           | -1,12 | 2,57E-02 | 1,40E-01 |
| <i>PAIP2</i>           | -1,12 | 2,58E-02 | 1,41E-01 |
| <i>CCDC111</i>         | -1,13 | 2,58E-02 | 1,41E-01 |
| <i>THC2336892</i>      | -1,09 | 2,58E-02 | 1,41E-01 |
| <i>TEX10</i>           | -1,09 | 2,58E-02 | 1,41E-01 |
| <i>CASZ1</i>           | 1,10  | 2,58E-02 | 1,41E-01 |
| <i>FGF10</i>           | 1,23  | 2,58E-02 | 1,41E-01 |
| <i>ATP11B</i>          | 1,08  | 2,58E-02 | 1,41E-01 |
| <i>CSDC2</i>           | 1,11  | 2,58E-02 | 1,41E-01 |
| <i>U09197</i>          | 1,14  | 2,58E-02 | 1,41E-01 |
| <i>THC2433864</i>      | 1,30  | 2,58E-02 | 1,41E-01 |
| <i>THC2283919</i>      | -1,10 | 2,59E-02 | 1,41E-01 |
| <i>TYW3</i>            | 1,07  | 2,59E-02 | 1,41E-01 |
| <i>AK022351</i>        | 1,20  | 2,59E-02 | 1,41E-01 |
| <i>A_24_P247303</i>    | 1,22  | 2,58E-02 | 1,41E-01 |
| <i>SNX22</i>           | 1,26  | 2,59E-02 | 1,41E-01 |
| <i>DENND4C</i>         | -1,08 | 2,59E-02 | 1,41E-01 |
| <i>EIF5A2</i>          | 1,09  | 2,59E-02 | 1,41E-01 |
| <i>TMEM106B</i>        | -1,10 | 2,59E-02 | 1,41E-01 |
| <i>IFIT2</i>           | -1,15 | 2,59E-02 | 1,41E-01 |
| <i>DKFZP434B0335</i>   | 1,09  | 2,59E-02 | 1,41E-01 |
| <i>TLR1</i>            | -1,17 | 2,59E-02 | 1,41E-01 |
| <i>NEIL2</i>           | -1,10 | 2,59E-02 | 1,41E-01 |
| <i>TNFSF18</i>         | -1,08 | 2,60E-02 | 1,41E-01 |
| <i>KIAA0947</i>        | -1,09 | 2,60E-02 | 1,41E-01 |
| <i>A_24_P928689</i>    | 1,12  | 2,60E-02 | 1,41E-01 |
| <i>SH3RF1</i>          | 1,14  | 2,60E-02 | 1,41E-01 |
| <i>ENST00000334464</i> | 1,09  | 2,60E-02 | 1,41E-01 |
| <i>SSX2IP</i>          | -1,21 | 2,61E-02 | 1,42E-01 |
| <i>HOXA5</i>           | -1,15 | 2,61E-02 | 1,42E-01 |
| <i>LOC646652</i>       | -1,12 | 2,61E-02 | 1,42E-01 |

|                        |       |          |          |
|------------------------|-------|----------|----------|
| <i>BY798802</i>        | 1,15  | 2,61E-02 | 1,42E-01 |
| <i>C6orf130</i>        | -1,12 | 2,61E-02 | 1,42E-01 |
| <i>ZNF415</i>          | -1,13 | 2,61E-02 | 1,42E-01 |
| <i>CR992331</i>        | 1,15  | 2,61E-02 | 1,42E-01 |
| <i>LOC440348</i>       | -1,11 | 2,61E-02 | 1,42E-01 |
| <i>CR591015</i>        | 1,09  | 2,61E-02 | 1,42E-01 |
| <i>SPSB2</i>           | -1,12 | 2,62E-02 | 1,42E-01 |
| <i>ENST00000383697</i> | -1,11 | 2,62E-02 | 1,42E-01 |
| <i>AF161343</i>        | -1,09 | 2,62E-02 | 1,42E-01 |
| <i>TMEM132A</i>        | 1,15  | 2,62E-02 | 1,42E-01 |
| <i>PPFIA4</i>          | -1,17 | 2,62E-02 | 1,42E-01 |
| <i>RAB2</i>            | 1,10  | 2,62E-02 | 1,42E-01 |
| <i>VIPR2</i>           | 1,21  | 2,62E-02 | 1,42E-01 |
| <i>DKFZp686L1814</i>   | 1,12  | 2,62E-02 | 1,42E-01 |
| <i>BG193790</i>        | -1,11 | 2,62E-02 | 1,42E-01 |
| <i>CACNB2</i>          | -1,20 | 2,63E-02 | 1,42E-01 |
| <i>HSPBAP1</i>         | -1,09 | 2,63E-02 | 1,42E-01 |
| <i>DNAJC17</i>         | -1,08 | 2,63E-02 | 1,42E-01 |
| <i>CSPG3</i>           | 1,08  | 2,63E-02 | 1,42E-01 |
| <i>A_24_P562242</i>    | 1,08  | 2,63E-02 | 1,42E-01 |
| <i>RP5-860F19.3</i>    | -1,12 | 2,63E-02 | 1,43E-01 |
| <i>ENST00000366751</i> | -1,11 | 2,63E-02 | 1,43E-01 |
| <i>BG188151</i>        | -1,08 | 2,63E-02 | 1,43E-01 |
| <i>GPR137B</i>         | 1,15  | 2,64E-02 | 1,43E-01 |
| <i>ENST00000379895</i> | -1,77 | 2,64E-02 | 1,43E-01 |
| <i>PIGV</i>            | -1,15 | 2,64E-02 | 1,43E-01 |
| <i>BG196763</i>        | 1,08  | 2,64E-02 | 1,43E-01 |
| <i>A_24_P926347</i>    | 1,10  | 2,64E-02 | 1,43E-01 |
| <i>NTRK2</i>           | 1,23  | 2,64E-02 | 1,43E-01 |
| <i>TRFP</i>            | -1,12 | 2,64E-02 | 1,43E-01 |
| <i>H81180</i>          | 1,09  | 2,64E-02 | 1,43E-01 |
| <i>BC011398</i>        | 1,07  | 2,64E-02 | 1,43E-01 |
| <i>GPSM1</i>           | -1,09 | 2,64E-02 | 1,43E-01 |
| <i>AA609749</i>        | 1,10  | 2,64E-02 | 1,43E-01 |
| <i>T52140</i>          | -1,16 | 2,65E-02 | 1,43E-01 |
| <i>RND1</i>            | 1,63  | 2,65E-02 | 1,43E-01 |
| <i>GIMAP6</i>          | -1,19 | 2,65E-02 | 1,43E-01 |
| <i>AL833372</i>        | -1,09 | 2,65E-02 | 1,43E-01 |
| <i>REG4</i>            | 1,05  | 2,65E-02 | 1,43E-01 |
| <i>SLC7A7</i>          | 1,14  | 2,65E-02 | 1,43E-01 |
| <i>FAM57B</i>          | 1,17  | 2,65E-02 | 1,43E-01 |
| <i>ENST00000368054</i> | -1,21 | 2,65E-02 | 1,43E-01 |
| <i>RGS13</i>           | -1,25 | 2,66E-02 | 1,43E-01 |
| <i>CARD15</i>          | -1,24 | 2,66E-02 | 1,43E-01 |

|                        |       |          |          |
|------------------------|-------|----------|----------|
| <i>PCMTD2</i>          | -1,15 | 2,66E-02 | 1,43E-01 |
| <i>AJ318805</i>        | -1,26 | 2,66E-02 | 1,43E-01 |
| <i>LHPP</i>            | -1,16 | 2,66E-02 | 1,43E-01 |
| <i>PIP5K3</i>          | -1,15 | 2,66E-02 | 1,43E-01 |
| <i>COPZ1</i>           | -1,11 | 2,66E-02 | 1,43E-01 |
| <i>THC2379988</i>      | -1,11 | 2,66E-02 | 1,43E-01 |
| <i>AV742170</i>        | -1,10 | 2,66E-02 | 1,43E-01 |
| <i>MIER1</i>           | 1,08  | 2,66E-02 | 1,43E-01 |
| <i>GH2</i>             | 1,11  | 2,66E-02 | 1,43E-01 |
| <i>GNG13</i>           | 1,14  | 2,66E-02 | 1,43E-01 |
| <i>KIAA1751</i>        | 1,21  | 2,66E-02 | 1,43E-01 |
| <i>ANGPT2</i>          | 1,35  | 2,66E-02 | 1,43E-01 |
| <i>THC2416008</i>      | -1,11 | 2,67E-02 | 1,43E-01 |
| <i>THC2314393</i>      | 1,08  | 2,67E-02 | 1,43E-01 |
| <i>ACTR3B</i>          | -1,08 | 2,67E-02 | 1,44E-01 |
| <i>AA612890</i>        | 1,08  | 2,67E-02 | 1,44E-01 |
| <i>DUSP4</i>           | 1,19  | 2,67E-02 | 1,44E-01 |
| <i>PELO</i>            | 1,12  | 2,67E-02 | 1,44E-01 |
| <i>STARD4</i>          | 1,16  | 2,67E-02 | 1,44E-01 |
| <i>BC040420</i>        | -1,12 | 2,67E-02 | 1,44E-01 |
| <i>ENST00000379731</i> | 1,15  | 2,68E-02 | 1,44E-01 |
| <i>LOC441191</i>       | -1,09 | 2,68E-02 | 1,44E-01 |
| <i>AK022020</i>        | -1,10 | 2,68E-02 | 1,44E-01 |
| <i>THC2453866</i>      | -1,13 | 2,68E-02 | 1,44E-01 |
| <i>THC2404892</i>      | -1,13 | 2,68E-02 | 1,44E-01 |
| <i>SCGB2A1</i>         | -1,08 | 2,68E-02 | 1,44E-01 |
| <i>LINCR</i>           | -1,14 | 2,69E-02 | 1,44E-01 |
| <i>HISPPD2A</i>        | 1,09  | 2,69E-02 | 1,44E-01 |
| <i>A_24_P943612</i>    | -1,08 | 2,69E-02 | 1,44E-01 |
| <i>SLC25A4</i>         | 1,31  | 2,69E-02 | 1,44E-01 |
| <i>A_24_P881562</i>    | -1,10 | 2,69E-02 | 1,44E-01 |
| <i>THOC4</i>           | 1,12  | 2,69E-02 | 1,44E-01 |
| <i>ADPRH</i>           | 1,14  | 2,69E-02 | 1,44E-01 |
| <i>RAP1A</i>           | 1,18  | 2,69E-02 | 1,44E-01 |
| <i>BZW2</i>            | 1,23  | 2,69E-02 | 1,44E-01 |
| <i>SRPX</i>            | -1,21 | 2,69E-02 | 1,44E-01 |
| <i>GREB1</i>           | -1,27 | 2,69E-02 | 1,44E-01 |
| <i>PARP2</i>           | -1,11 | 2,69E-02 | 1,44E-01 |
| <i>KIAA1183</i>        | -1,13 | 2,70E-02 | 1,44E-01 |
| <i>LOC283507</i>       | -1,14 | 2,70E-02 | 1,44E-01 |
| <i>NUP188</i>          | 1,07  | 2,70E-02 | 1,44E-01 |
| <i>GMEB2</i>           | 1,08  | 2,70E-02 | 1,44E-01 |
| <i>NNT</i>             | 1,14  | 2,70E-02 | 1,44E-01 |
| <i>KLHL5</i>           | 1,16  | 2,70E-02 | 1,44E-01 |

|                     |       |          |          |
|---------------------|-------|----------|----------|
| <i>A_24_P109661</i> | 1,36  | 2,70E-02 | 1,45E-01 |
| <i>AF007131</i>     | -1,10 | 2,70E-02 | 1,45E-01 |
| <i>TMEM132B</i>     | 1,11  | 2,70E-02 | 1,45E-01 |
| <i>LOC647179</i>    | -1,09 | 2,70E-02 | 1,45E-01 |
| <i>CR601322</i>     | 1,08  | 2,70E-02 | 1,45E-01 |
| <i>CASP5</i>        | 1,12  | 2,71E-02 | 1,45E-01 |
| <i>HR44</i>         | 1,09  | 2,71E-02 | 1,45E-01 |
| <i>A_24_P933940</i> | -1,15 | 2,71E-02 | 1,45E-01 |
| <i>QPR1</i>         | -1,15 | 2,71E-02 | 1,45E-01 |
| <i>A_24_P746044</i> | 1,10  | 2,71E-02 | 1,45E-01 |
| <i>DOHH</i>         | 1,08  | 2,71E-02 | 1,45E-01 |
| <i>GZMK</i>         | -1,47 | 2,71E-02 | 1,45E-01 |
| <i>CBX8</i>         | -1,12 | 2,71E-02 | 1,45E-01 |
| <i>ATXN7</i>        | 1,11  | 2,71E-02 | 1,45E-01 |
| <i>LOC286254</i>    | -1,23 | 2,72E-02 | 1,45E-01 |
| <i>FBXL10</i>       | -1,07 | 2,72E-02 | 1,45E-01 |
| <i>A_32_P179646</i> | -1,19 | 2,72E-02 | 1,45E-01 |
| <i>A_32_P87993</i>  | -1,09 | 2,72E-02 | 1,45E-01 |
| <i>THC2375723</i>   | 1,07  | 2,72E-02 | 1,45E-01 |
| <i>A_32_P82293</i>  | -1,19 | 2,73E-02 | 1,45E-01 |
| <i>NBPF1</i>        | -1,10 | 2,73E-02 | 1,45E-01 |
| <i>EVL</i>          | -1,10 | 2,73E-02 | 1,45E-01 |
| <i>BC080577</i>     | -1,09 | 2,73E-02 | 1,45E-01 |
| <i>C1orf129</i>     | 1,09  | 2,73E-02 | 1,45E-01 |
| <i>ZC3H13</i>       | 1,10  | 2,73E-02 | 1,45E-01 |
| <i>FOXF1</i>        | 1,34  | 2,73E-02 | 1,45E-01 |
| <i>THC2252199</i>   | -1,08 | 2,73E-02 | 1,45E-01 |
| <i>A_24_P7470</i>   | 1,13  | 2,73E-02 | 1,45E-01 |
| <i>CCNJL</i>        | -1,13 | 2,73E-02 | 1,45E-01 |
| <i>BC015129</i>     | 1,10  | 2,73E-02 | 1,45E-01 |
| <i>RAB22A</i>       | 1,08  | 2,74E-02 | 1,46E-01 |
| <i>RNASE11</i>      | 1,10  | 2,74E-02 | 1,46E-01 |
| <i>MYH2</i>         | 1,48  | 2,74E-02 | 1,46E-01 |
| <i>DCHS1</i>        | -1,11 | 2,74E-02 | 1,46E-01 |
| <i>TMEM148</i>      | 1,10  | 2,74E-02 | 1,46E-01 |
| <i>OTUB2</i>        | -1,07 | 2,74E-02 | 1,46E-01 |
| <i>AJ519285</i>     | -1,84 | 2,74E-02 | 1,46E-01 |
| <i>BNIP3L</i>       | -1,11 | 2,74E-02 | 1,46E-01 |
| <i>A_24_P187174</i> | 1,18  | 2,74E-02 | 1,46E-01 |
| <i>CGB1</i>         | 1,34  | 2,74E-02 | 1,46E-01 |
| <i>CR605298</i>     | 1,37  | 2,74E-02 | 1,46E-01 |
| <i>A_24_P918473</i> | -1,09 | 2,75E-02 | 1,46E-01 |
| <i>KIAA1458</i>     | 1,08  | 2,75E-02 | 1,46E-01 |
| <i>AA701368</i>     | -1,09 | 2,75E-02 | 1,46E-01 |

|                        |       |          |          |
|------------------------|-------|----------|----------|
| <i>PI4KII</i>          | 1,11  | 2,75E-02 | 1,46E-01 |
| <i>SGTB</i>            | 1,08  | 2,75E-02 | 1,46E-01 |
| <i>A_32_P234849</i>    | -1,12 | 2,76E-02 | 1,46E-01 |
| <i>AW505189</i>        | 1,10  | 2,76E-02 | 1,46E-01 |
| <i>SPTBN1</i>          | 1,18  | 2,76E-02 | 1,46E-01 |
| <i>THC2441040</i>      | -1,42 | 2,76E-02 | 1,46E-01 |
| <i>LOC253805</i>       | 1,08  | 2,76E-02 | 1,46E-01 |
| <i>FLJ36031</i>        | 1,20  | 2,76E-02 | 1,46E-01 |
| <i>PPRC1</i>           | 1,21  | 2,76E-02 | 1,47E-01 |
| <i>A_23_P59828</i>     | -1,06 | 2,77E-02 | 1,47E-01 |
| <i>COX7A2</i>          | 1,12  | 2,77E-02 | 1,47E-01 |
| <i>ACTR2</i>           | 1,15  | 2,78E-02 | 1,47E-01 |
| <i>AK129652</i>        | -1,11 | 2,78E-02 | 1,47E-01 |
| <i>LOC644488</i>       | -1,16 | 2,78E-02 | 1,47E-01 |
| <i>CCDC80</i>          | -1,28 | 2,78E-02 | 1,47E-01 |
| <i>OAT</i>             | -1,16 | 2,78E-02 | 1,47E-01 |
| <i>TADA2L</i>          | 1,06  | 2,78E-02 | 1,47E-01 |
| <i>GRIA2</i>           | -1,17 | 2,78E-02 | 1,47E-01 |
| <i>ALG3</i>            | -1,10 | 2,78E-02 | 1,47E-01 |
| <i>ZBTB38</i>          | -1,12 | 2,78E-02 | 1,47E-01 |
| <i>PSMB7</i>           | 1,05  | 2,79E-02 | 1,47E-01 |
| <i>AI267511</i>        | 1,10  | 2,79E-02 | 1,48E-01 |
| <i>ENST00000382592</i> | 1,14  | 2,79E-02 | 1,48E-01 |
| <i>POLE</i>            | 1,05  | 2,79E-02 | 1,48E-01 |
| <i>CFTR</i>            | 1,05  | 2,79E-02 | 1,48E-01 |
| <i>THC2317565</i>      | -1,15 | 2,79E-02 | 1,48E-01 |
| <i>HLA-DOA</i>         | -1,15 | 2,79E-02 | 1,48E-01 |
| <i>TNIP1</i>           | 1,11  | 2,79E-02 | 1,48E-01 |
| <i>NAB1</i>            | 1,12  | 2,79E-02 | 1,48E-01 |
| <i>KIAA0644</i>        | 1,16  | 2,79E-02 | 1,48E-01 |
| <i>NKTR</i>            | -1,11 | 2,80E-02 | 1,48E-01 |
| <i>EIF4A1</i>          | 1,13  | 2,80E-02 | 1,48E-01 |
| <i>EFNA5</i>           | -1,13 | 2,80E-02 | 1,48E-01 |
| <i>AK027091</i>        | -1,30 | 2,81E-02 | 1,48E-01 |
| <i>SLC4A4</i>          | -1,26 | 2,80E-02 | 1,48E-01 |
| <i>ENST00000339762</i> | -1,21 | 2,80E-02 | 1,48E-01 |
| <i>AK055742</i>        | -1,11 | 2,80E-02 | 1,48E-01 |
| <i>THC2280837</i>      | -1,11 | 2,81E-02 | 1,48E-01 |
| <i>TMEM16K</i>         | -1,09 | 2,80E-02 | 1,48E-01 |
| <i>ENST00000333722</i> | -1,09 | 2,80E-02 | 1,48E-01 |
| <i>POMP</i>            | 1,09  | 2,80E-02 | 1,48E-01 |
| <i>A_23_P20793</i>     | -1,11 | 2,81E-02 | 1,48E-01 |
| <i>AK074620</i>        | 1,17  | 2,81E-02 | 1,48E-01 |
| <i>A_24_P518369</i>    | 1,11  | 2,81E-02 | 1,48E-01 |

|                 |       |          |          |
|-----------------|-------|----------|----------|
| AF216583        | -1,09 | 2,82E-02 | 1,48E-01 |
| ABCA11          | -1,11 | 2,82E-02 | 1,48E-01 |
| A_24_P539275    | -1,07 | 2,82E-02 | 1,48E-01 |
| BC041401        | -1,13 | 2,82E-02 | 1,48E-01 |
| ZNF138          | -1,10 | 2,82E-02 | 1,48E-01 |
| THC2305590      | -1,09 | 2,82E-02 | 1,49E-01 |
| LCE1E           | 1,08  | 2,82E-02 | 1,49E-01 |
| THC2376215      | -1,13 | 2,82E-02 | 1,49E-01 |
| BU678009        | 1,11  | 2,82E-02 | 1,49E-01 |
| PPP3CC          | 1,11  | 2,83E-02 | 1,49E-01 |
| DHRS3           | -1,20 | 2,83E-02 | 1,49E-01 |
| USP7            | 1,06  | 2,83E-02 | 1,49E-01 |
| BM702886        | 1,13  | 2,83E-02 | 1,49E-01 |
| PSMB10          | -1,06 | 2,84E-02 | 1,49E-01 |
| LAT             | -1,14 | 2,84E-02 | 1,49E-01 |
| FLJ45244        | -1,12 | 2,84E-02 | 1,49E-01 |
| A_24_P212314    | 1,20  | 2,84E-02 | 1,49E-01 |
| AA311568        | -1,15 | 2,84E-02 | 1,49E-01 |
| AF035290        | 1,28  | 2,84E-02 | 1,49E-01 |
| A_24_P334208    | 1,09  | 2,84E-02 | 1,49E-01 |
| DKFZp586C0721   | -1,39 | 2,85E-02 | 1,49E-01 |
| ENST00000295112 | -1,15 | 2,85E-02 | 1,49E-01 |
| CRNKL1          | -1,09 | 2,85E-02 | 1,50E-01 |
| CPOX            | -1,08 | 2,85E-02 | 1,50E-01 |
| HSF2            | -1,11 | 2,85E-02 | 1,50E-01 |
| BC018099        | -1,22 | 2,86E-02 | 1,50E-01 |
| THC2280373      | 1,06  | 2,86E-02 | 1,50E-01 |
| DMRTC1          | -1,23 | 2,86E-02 | 1,50E-01 |
| MTO1            | -1,11 | 2,86E-02 | 1,50E-01 |
| MGST3           | 1,08  | 2,86E-02 | 1,50E-01 |
| ENST00000381158 | 1,39  | 2,86E-02 | 1,50E-01 |
| PTPN18          | -1,10 | 2,86E-02 | 1,50E-01 |
| CR612518        | 1,11  | 2,86E-02 | 1,50E-01 |
| THC2316236      | -1,16 | 2,86E-02 | 1,50E-01 |
| AK124299        | -1,12 | 2,87E-02 | 1,50E-01 |
| CALM1           | 1,09  | 2,87E-02 | 1,50E-01 |
| ELL             | 1,09  | 2,87E-02 | 1,50E-01 |
| ENST00000383048 | -1,74 | 2,88E-02 | 1,51E-01 |
| LOC652159       | -1,46 | 2,88E-02 | 1,51E-01 |
| AW090036        | -1,09 | 2,88E-02 | 1,51E-01 |
| CKLF            | -1,07 | 2,88E-02 | 1,51E-01 |
| BC033994        | 1,07  | 2,87E-02 | 1,51E-01 |
| THC2356891      | 1,17  | 2,88E-02 | 1,51E-01 |
| ADRA1B          | 1,44  | 2,88E-02 | 1,51E-01 |



|                 |       |          |          |
|-----------------|-------|----------|----------|
| AK057740        | -1,15 | 2,88E-02 | 1,51E-01 |
| FLJ22814        | -1,07 | 2,88E-02 | 1,51E-01 |
| RAB42           | -1,15 | 2,88E-02 | 1,51E-01 |
| KIAA0484        | -1,17 | 2,88E-02 | 1,51E-01 |
| ENST00000344523 | -1,07 | 2,88E-02 | 1,51E-01 |
| SYNE2           | 1,18  | 2,88E-02 | 1,51E-01 |
| CSTB            | -1,30 | 2,88E-02 | 1,51E-01 |
| RASSF7          | -1,15 | 2,89E-02 | 1,51E-01 |
| ENST00000369519 | -1,15 | 2,89E-02 | 1,51E-01 |
| THC2438926      | 1,12  | 2,89E-02 | 1,51E-01 |
| KCNH8           | 1,15  | 2,89E-02 | 1,51E-01 |
| AK021458        | -1,07 | 2,89E-02 | 1,51E-01 |
| ZNF516          | -1,30 | 2,89E-02 | 1,51E-01 |
| CFLAR           | 1,09  | 2,89E-02 | 1,51E-01 |
| ZF              | -1,13 | 2,90E-02 | 1,51E-01 |
| AK097080        | -1,14 | 2,90E-02 | 1,51E-01 |
| AF227517        | 1,16  | 2,90E-02 | 1,51E-01 |
| C1orf79         | -1,09 | 2,90E-02 | 1,51E-01 |
| QRICH1          | -1,06 | 2,90E-02 | 1,51E-01 |
| A_32_P125056    | -1,10 | 2,90E-02 | 1,51E-01 |
| BRP44           | 1,08  | 2,90E-02 | 1,51E-01 |
| THC2447406      | -1,08 | 2,91E-02 | 1,51E-01 |
| DCC1            | -1,13 | 2,91E-02 | 1,52E-01 |
| TMEM89          | 1,11  | 2,91E-02 | 1,52E-01 |
| BX647543        | -1,19 | 2,91E-02 | 1,52E-01 |
| EDN2            | 1,16  | 2,91E-02 | 1,52E-01 |
| AA258288        | -1,08 | 2,91E-02 | 1,52E-01 |
| THC2432621      | 1,10  | 2,91E-02 | 1,52E-01 |
| FLJ13195        | -1,14 | 2,91E-02 | 1,52E-01 |
| EEF1E1          | 1,09  | 2,91E-02 | 1,52E-01 |
| ENST00000330288 | 1,10  | 2,91E-02 | 1,52E-01 |
| THC2377877      | -1,10 | 2,92E-02 | 1,52E-01 |
| AK022045        | -1,20 | 2,92E-02 | 1,52E-01 |
| A_24_P934214    | 1,09  | 2,92E-02 | 1,52E-01 |
| A_32_P12494     | 1,08  | 2,92E-02 | 1,52E-01 |
| SLC15A4         | -1,13 | 2,92E-02 | 1,52E-01 |
| CCDC87          | -1,13 | 2,92E-02 | 1,52E-01 |
| PTCD2           | -1,07 | 2,92E-02 | 1,52E-01 |
| A_24_P483331    | 1,09  | 2,92E-02 | 1,52E-01 |
| A_24_P307424    | 1,15  | 2,93E-02 | 1,52E-01 |
| A_24_P161733    | 1,31  | 2,93E-02 | 1,52E-01 |
| FLJ21272        | -1,16 | 2,93E-02 | 1,52E-01 |
| MAPK9           | 1,09  | 2,93E-02 | 1,52E-01 |
| AL110248        | 1,11  | 2,93E-02 | 1,52E-01 |

|                 |       |          |          |
|-----------------|-------|----------|----------|
| VPS13C          | -1,11 | 2,93E-02 | 1,52E-01 |
| THC2401540      | -1,12 | 2,94E-02 | 1,52E-01 |
| AF086124        | -1,06 | 2,94E-02 | 1,52E-01 |
| PHACTR3         | -1,49 | 2,94E-02 | 1,52E-01 |
| CR612065        | -1,15 | 2,94E-02 | 1,52E-01 |
| RUFY1           | -1,09 | 2,94E-02 | 1,52E-01 |
| MDS025          | -1,07 | 2,94E-02 | 1,52E-01 |
| LOC646626       | 1,19  | 2,94E-02 | 1,52E-01 |
| CLEC4G          | -1,14 | 2,94E-02 | 1,52E-01 |
| LOC441120       | 1,10  | 2,94E-02 | 1,53E-01 |
| BC017721        | -1,26 | 2,95E-02 | 1,53E-01 |
| AAK1            | 1,08  | 2,94E-02 | 1,53E-01 |
| LOC92345        | 1,08  | 2,95E-02 | 1,53E-01 |
| BAIAP2L2        | -1,15 | 2,95E-02 | 1,53E-01 |
| THC2430656      | -1,09 | 2,95E-02 | 1,53E-01 |
| A_24_P913576    | -1,17 | 2,95E-02 | 1,53E-01 |
| ENST00000377607 | -1,09 | 2,95E-02 | 1,53E-01 |
| SNTA1           | 1,12  | 2,95E-02 | 1,53E-01 |
| Z18824          | -1,51 | 2,96E-02 | 1,53E-01 |
| A_24_P307075    | 1,18  | 2,96E-02 | 1,53E-01 |
| THC2278027      | -1,10 | 2,96E-02 | 1,53E-01 |
| TANC2           | 1,09  | 2,96E-02 | 1,53E-01 |
| C1orf114        | 1,14  | 2,96E-02 | 1,53E-01 |
| EXOD1           | -1,08 | 2,96E-02 | 1,53E-01 |
| PAGE4           | -1,60 | 2,97E-02 | 1,54E-01 |
| AKR7A2          | -1,15 | 2,97E-02 | 1,54E-01 |
| PCYT1A          | 1,10  | 2,97E-02 | 1,54E-01 |
| KLHL26          | 1,14  | 2,97E-02 | 1,54E-01 |
| THC2378721      | 1,08  | 2,98E-02 | 1,54E-01 |
| CDKN1C          | -1,29 | 2,98E-02 | 1,54E-01 |
| C16orf30        | -1,14 | 2,98E-02 | 1,54E-01 |
| TRIM4           | -1,14 | 2,98E-02 | 1,54E-01 |
| RNF113A         | -1,10 | 2,98E-02 | 1,54E-01 |
| C17orf25        | -1,07 | 2,98E-02 | 1,54E-01 |
| ZC3H3           | 1,07  | 2,98E-02 | 1,54E-01 |
| CRIP1           | 1,09  | 2,98E-02 | 1,54E-01 |
| THC2381421      | 1,10  | 2,98E-02 | 1,54E-01 |
| CDC2L1          | 1,10  | 2,98E-02 | 1,54E-01 |
| SLC22A7         | 1,10  | 2,98E-02 | 1,54E-01 |
| RREB1           | 1,11  | 2,98E-02 | 1,54E-01 |
| THC2425063      | 1,19  | 2,98E-02 | 1,54E-01 |
| AGT             | 1,47  | 2,98E-02 | 1,54E-01 |
| U88316          | 1,10  | 2,99E-02 | 1,54E-01 |
| THC2405400      | 1,11  | 2,99E-02 | 1,54E-01 |

|                        |       |          |          |
|------------------------|-------|----------|----------|
| <i>ENST00000252229</i> | -1,10 | 2,99E-02 | 1,54E-01 |
| <i>RTN4RL1</i>         | 1,09  | 2,99E-02 | 1,54E-01 |
| <i>AK098210</i>        | -1,13 | 2,99E-02 | 1,54E-01 |
| <i>A_24_P494658</i>    | 1,13  | 2,99E-02 | 1,54E-01 |
| <i>EDG2</i>            | 1,26  | 3,00E-02 | 1,54E-01 |
| <i>MBD4</i>            | -1,09 | 3,00E-02 | 1,54E-01 |
| <i>AFG3L1</i>          | -1,14 | 3,00E-02 | 1,55E-01 |
| <i>KCNJ9</i>           | 1,10  | 3,00E-02 | 1,55E-01 |
| <i>INTS8</i>           | -1,12 | 3,01E-02 | 1,55E-01 |
| <i>CCDC93</i>          | -1,07 | 3,01E-02 | 1,55E-01 |
| <i>BC014579</i>        | -1,06 | 3,01E-02 | 1,55E-01 |
| <i>OTUD6A</i>          | 1,08  | 3,01E-02 | 1,55E-01 |
| <i>ABL1</i>            | 1,09  | 3,01E-02 | 1,55E-01 |
| <i>C10orf88</i>        | -1,12 | 3,01E-02 | 1,55E-01 |
| <i>THC2317491</i>      | -1,21 | 3,01E-02 | 1,55E-01 |
| <i>CR600369</i>        | -1,11 | 3,01E-02 | 1,55E-01 |
| <i>LOC283680</i>       | -1,08 | 3,01E-02 | 1,55E-01 |
| <i>AK125829</i>        | 1,10  | 3,01E-02 | 1,55E-01 |
| <i>CA3</i>             | 1,44  | 3,01E-02 | 1,55E-01 |
| <i>OR51B2</i>          | -1,09 | 3,02E-02 | 1,55E-01 |
| <i>E2F5</i>            | -1,09 | 3,02E-02 | 1,55E-01 |
| <i>THC2282209</i>      | -1,09 | 3,02E-02 | 1,55E-01 |
| <i>OK/SW-CL.92</i>     | -1,22 | 3,02E-02 | 1,55E-01 |
| <i>THC2313920</i>      | -1,12 | 3,02E-02 | 1,55E-01 |
| <i>WDR16</i>           | -1,11 | 3,02E-02 | 1,55E-01 |
| <i>AA579646</i>        | -1,09 | 3,02E-02 | 1,55E-01 |
| <i>SEC15L2</i>         | 1,06  | 3,02E-02 | 1,55E-01 |
| <i>CDC14B</i>          | 1,16  | 3,02E-02 | 1,55E-01 |
| <i>PCDHB14</i>         | -1,13 | 3,03E-02 | 1,55E-01 |
| <i>KIAA1833</i>        | 1,07  | 3,03E-02 | 1,55E-01 |
| <i>PTPRO</i>           | -1,15 | 3,03E-02 | 1,55E-01 |
| <i>KRTCAP3</i>         | -1,13 | 3,03E-02 | 1,55E-01 |
| <i>MAP3K6</i>          | -1,13 | 3,03E-02 | 1,55E-01 |
| <i>AY040225</i>        | 1,09  | 3,03E-02 | 1,55E-01 |
| <i>GCA</i>             | 1,13  | 3,03E-02 | 1,55E-01 |
| <i>FOSB</i>            | 2,42  | 3,03E-02 | 1,55E-01 |
| <i>CNTNAP3</i>         | 1,25  | 3,03E-02 | 1,55E-01 |
| <i>L07392</i>          | 1,11  | 3,04E-02 | 1,56E-01 |
| <i>UBE3C</i>           | 1,08  | 3,04E-02 | 1,56E-01 |
| <i>FXVD2</i>           | 1,10  | 3,04E-02 | 1,56E-01 |
| <i>PLCXD1</i>          | -1,18 | 3,05E-02 | 1,56E-01 |
| <i>TAS2R13</i>         | -1,10 | 3,04E-02 | 1,56E-01 |
| <i>THC2275767</i>      | 1,08  | 3,04E-02 | 1,56E-01 |
| <i>SOX3</i>            | 1,12  | 3,04E-02 | 1,56E-01 |

|              |       |          |          |
|--------------|-------|----------|----------|
| AA334114     | 1,13  | 3,04E-02 | 1,56E-01 |
| CA308637     | -1,09 | 3,05E-02 | 1,56E-01 |
| LOC51136     | -1,09 | 3,05E-02 | 1,56E-01 |
| BC014938     | -1,07 | 3,05E-02 | 1,56E-01 |
| UQCRFS1      | 1,09  | 3,05E-02 | 1,56E-01 |
| CCNB1        | -1,12 | 3,05E-02 | 1,56E-01 |
| THC2369020   | -1,15 | 3,06E-02 | 1,56E-01 |
| A_32_P52948  | 1,09  | 3,06E-02 | 1,56E-01 |
| DPM3         | -1,08 | 3,06E-02 | 1,56E-01 |
| EDEM3        | -1,10 | 3,06E-02 | 1,56E-01 |
| NLGN2        | -1,10 | 3,06E-02 | 1,56E-01 |
| BX360933     | 1,08  | 3,06E-02 | 1,56E-01 |
| BC013250     | -1,12 | 3,06E-02 | 1,56E-01 |
| ZNF311       | -1,06 | 3,06E-02 | 1,56E-01 |
| AK024456     | 1,09  | 3,06E-02 | 1,56E-01 |
| AF230200     | -1,09 | 3,06E-02 | 1,56E-01 |
| A_24_P755169 | 1,23  | 3,06E-02 | 1,56E-01 |
| DOPEY1       | -1,09 | 3,07E-02 | 1,57E-01 |
| ANP32B       | 1,12  | 3,07E-02 | 1,57E-01 |
| RPL6         | -1,07 | 3,07E-02 | 1,57E-01 |
| DLG7         | -1,11 | 3,08E-02 | 1,57E-01 |
| C16orf69     | -1,10 | 3,07E-02 | 1,57E-01 |
| A_32_P107454 | 1,09  | 3,08E-02 | 1,57E-01 |
| TRBV5-4      | -1,41 | 3,08E-02 | 1,57E-01 |
| IFRG15       | 1,09  | 3,08E-02 | 1,57E-01 |
| APBB2        | 1,18  | 3,08E-02 | 1,57E-01 |
| PALMD        | 1,21  | 3,08E-02 | 1,57E-01 |
| AK092810     | -1,11 | 3,08E-02 | 1,57E-01 |
| BC031108     | 1,08  | 3,08E-02 | 1,57E-01 |
| BX089851     | -1,14 | 3,09E-02 | 1,57E-01 |
| AJ293393     | -1,14 | 3,09E-02 | 1,57E-01 |
| AV698092     | -1,12 | 3,09E-02 | 1,57E-01 |
| TMEM93       | 1,07  | 3,09E-02 | 1,57E-01 |
| EMD          | 1,10  | 3,09E-02 | 1,57E-01 |
| HAPLN2       | 1,24  | 3,09E-02 | 1,57E-01 |
| TMSB4X       | 1,10  | 3,09E-02 | 1,57E-01 |
| CUTL1        | -1,10 | 3,09E-02 | 1,57E-01 |
| A_24_P755505 | -1,08 | 3,10E-02 | 1,57E-01 |
| FBXL2        | -1,15 | 3,10E-02 | 1,57E-01 |
| IL18R1       | -1,14 | 3,10E-02 | 1,58E-01 |
| AA704712     | 1,33  | 3,10E-02 | 1,58E-01 |
| PHF21A       | 1,07  | 3,10E-02 | 1,58E-01 |
| GPR114       | -1,11 | 3,10E-02 | 1,58E-01 |
| CYTL1        | -1,38 | 3,10E-02 | 1,58E-01 |

|                        |       |          |          |
|------------------------|-------|----------|----------|
| <i>GABPA</i>           | 1,12  | 3,10E-02 | 1,58E-01 |
| <i>OKL38</i>           | 1,11  | 3,11E-02 | 1,58E-01 |
| <i>KIAA1727</i>        | -1,11 | 3,11E-02 | 1,58E-01 |
| <i>HAT1</i>            | 1,07  | 3,11E-02 | 1,58E-01 |
| <i>A_24_P108281</i>    | 1,09  | 3,11E-02 | 1,58E-01 |
| <i>BARD1</i>           | 1,11  | 3,11E-02 | 1,58E-01 |
| <i>C10orf38</i>        | -1,10 | 3,11E-02 | 1,58E-01 |
| <i>PIGQ</i>            | 1,08  | 3,12E-02 | 1,58E-01 |
| <i>IGSF4D</i>          | 1,19  | 3,12E-02 | 1,58E-01 |
| <i>TMC4</i>            | -1,16 | 3,12E-02 | 1,58E-01 |
| <i>PSMD8</i>           | 1,09  | 3,13E-02 | 1,59E-01 |
| <i>AK094969</i>        | 1,11  | 3,13E-02 | 1,59E-01 |
| <i>ARMCX1</i>          | -1,10 | 3,13E-02 | 1,59E-01 |
| <i>AK094327</i>        | -1,10 | 3,13E-02 | 1,59E-01 |
| <i>AI878825</i>        | 1,08  | 3,13E-02 | 1,59E-01 |
| <i>BX427435</i>        | 1,18  | 3,13E-02 | 1,59E-01 |
| <i>ZCCHC5</i>          | 1,21  | 3,13E-02 | 1,59E-01 |
| <i>THC2341087</i>      | -1,13 | 3,14E-02 | 1,59E-01 |
| <i>LOC201175</i>       | 1,08  | 3,14E-02 | 1,59E-01 |
| <i>ENST00000314984</i> | -1,07 | 3,14E-02 | 1,59E-01 |
| <i>AF193050</i>        | 1,08  | 3,14E-02 | 1,59E-01 |
| <i>NAG6</i>            | 1,25  | 3,14E-02 | 1,59E-01 |
| <i>ZBTB25</i>          | -1,08 | 3,14E-02 | 1,59E-01 |
| <i>ENST00000369577</i> | -1,10 | 3,15E-02 | 1,59E-01 |
| <i>LOC442075</i>       | -1,10 | 3,15E-02 | 1,59E-01 |
| <i>A_32_P185628</i>    | 1,08  | 3,15E-02 | 1,59E-01 |
| <i>AK023447</i>        | -1,12 | 3,15E-02 | 1,60E-01 |
| <i>POP1</i>            | -1,11 | 3,15E-02 | 1,60E-01 |
| <i>TTC28</i>           | -1,07 | 3,16E-02 | 1,60E-01 |
| <i>AK094950</i>        | -1,12 | 3,16E-02 | 1,60E-01 |
| <i>THC2416098</i>      | -1,16 | 3,16E-02 | 1,60E-01 |
| <i>C1orf103</i>        | -1,13 | 3,16E-02 | 1,60E-01 |
| <i>C9orf61</i>         | 1,23  | 3,16E-02 | 1,60E-01 |
| <i>PPIL3</i>           | -1,13 | 3,16E-02 | 1,60E-01 |
| <i>PES1</i>            | 1,07  | 3,17E-02 | 1,60E-01 |
| <i>BCHE</i>            | -1,58 | 3,17E-02 | 1,60E-01 |
| <i>DKFZP586K1520</i>   | -1,16 | 3,17E-02 | 1,60E-01 |
| <i>THC2282516</i>      | -1,06 | 3,17E-02 | 1,60E-01 |
| <i>BC042649</i>        | 1,10  | 3,17E-02 | 1,60E-01 |
| <i>CCDC47</i>          | 1,05  | 3,17E-02 | 1,60E-01 |
| <i>A_24_P456802</i>    | -1,10 | 3,18E-02 | 1,60E-01 |
| <i>AF086321</i>        | -1,10 | 3,18E-02 | 1,60E-01 |
| <i>GAS2</i>            | -1,28 | 3,18E-02 | 1,60E-01 |
| <i>FKHL18</i>          | 1,14  | 3,18E-02 | 1,60E-01 |

|                        |       |          |          |
|------------------------|-------|----------|----------|
| <i>ECGF1</i>           | 1,24  | 3,18E-02 | 1,60E-01 |
| <i>C20orf58</i>        | -1,14 | 3,18E-02 | 1,61E-01 |
| <i>A_32_P36481</i>     | -1,11 | 3,18E-02 | 1,61E-01 |
| <i>SLC25A18</i>        | -1,27 | 3,19E-02 | 1,61E-01 |
| <i>TRIB2</i>           | -1,12 | 3,19E-02 | 1,61E-01 |
| <i>RAXL1</i>           | -1,10 | 3,19E-02 | 1,61E-01 |
| <i>CCRL2</i>           | 1,11  | 3,19E-02 | 1,61E-01 |
| <i>ALPL</i>            | 1,14  | 3,19E-02 | 1,61E-01 |
| <i>ENST00000330469</i> | 1,25  | 3,19E-02 | 1,61E-01 |
| <i>C20orf177</i>       | -1,12 | 3,19E-02 | 1,61E-01 |
| <i>ZFP2</i>            | -1,11 | 3,19E-02 | 1,61E-01 |
| <i>AX721288</i>        | -1,08 | 3,19E-02 | 1,61E-01 |
| <i>AF204269</i>        | 1,06  | 3,19E-02 | 1,61E-01 |
| <i>SEC31L2</i>         | -1,12 | 3,20E-02 | 1,61E-01 |
| <i>NECAP2</i>          | -1,08 | 3,20E-02 | 1,61E-01 |
| <i>MON1B</i>           | 1,08  | 3,20E-02 | 1,61E-01 |
| <i>L48692</i>          | 1,14  | 3,20E-02 | 1,61E-01 |
| <i>ENST00000361227</i> | 1,14  | 3,20E-02 | 1,61E-01 |
| <i>EREG</i>            | 1,23  | 3,20E-02 | 1,61E-01 |
| <i>AK095791</i>        | -1,26 | 3,20E-02 | 1,61E-01 |
| <i>A_32_P156476</i>    | 1,08  | 3,20E-02 | 1,61E-01 |
| <i>SLC35D1</i>         | 1,10  | 3,20E-02 | 1,61E-01 |
| <i>MYBPC3</i>          | 1,08  | 3,20E-02 | 1,61E-01 |
| <i>NP285481</i>        | 1,08  | 3,20E-02 | 1,61E-01 |
| <i>GCNT3</i>           | 1,11  | 3,20E-02 | 1,61E-01 |
| <i>A_24_P357986</i>    | 1,10  | 3,20E-02 | 1,61E-01 |
| <i>LOC151658</i>       | 1,10  | 3,21E-02 | 1,61E-01 |
| <i>A_24_P255954</i>    | 1,29  | 3,21E-02 | 1,61E-01 |
| <i>HIBCH</i>           | -1,13 | 3,21E-02 | 1,61E-01 |
| <i>TP53BP1</i>         | -1,09 | 3,21E-02 | 1,61E-01 |
| <i>EFCAB1</i>          | -1,43 | 3,21E-02 | 1,61E-01 |
| <i>BX090181</i>        | 1,14  | 3,21E-02 | 1,61E-01 |
| <i>PNKD</i>            | -1,09 | 3,22E-02 | 1,61E-01 |
| <i>A_24_P458168</i>    | 1,09  | 3,22E-02 | 1,61E-01 |
| <i>MEG3</i>            | -1,22 | 3,22E-02 | 1,61E-01 |
| <i>AA778291</i>        | -1,15 | 3,22E-02 | 1,61E-01 |
| <i>OBP2A</i>           | -1,08 | 3,22E-02 | 1,61E-01 |
| <i>NDUFB9</i>          | 1,07  | 3,22E-02 | 1,62E-01 |
| <i>ADCY7</i>           | -1,18 | 3,22E-02 | 1,62E-01 |
| <i>THC2406815</i>      | -1,15 | 3,22E-02 | 1,62E-01 |
| <i>THC2290557</i>      | -1,11 | 3,22E-02 | 1,62E-01 |
| <i>FLJ45445</i>        | -1,12 | 3,23E-02 | 1,62E-01 |
| <i>FLJ38725</i>        | 1,11  | 3,23E-02 | 1,62E-01 |
| <i>AF161340</i>        | 1,12  | 3,23E-02 | 1,62E-01 |

|                        |       |          |          |
|------------------------|-------|----------|----------|
| <i>FLJ30092</i>        | -1,08 | 3,23E-02 | 1,62E-01 |
| <i>AF009267</i>        | 1,10  | 3,23E-02 | 1,62E-01 |
| <i>ENST00000368192</i> | 1,12  | 3,24E-02 | 1,62E-01 |
| <i>RP1L1</i>           | 1,08  | 3,24E-02 | 1,62E-01 |
| <i>THC2409530</i>      | 1,09  | 3,24E-02 | 1,62E-01 |
| <i>CARD8</i>           | -1,14 | 3,24E-02 | 1,62E-01 |
| <i>PKIG</i>            | 1,12  | 3,24E-02 | 1,62E-01 |
| <i>KIR2DS4</i>         | -1,06 | 3,25E-02 | 1,62E-01 |
| <i>CN430223</i>        | 1,14  | 3,25E-02 | 1,63E-01 |
| <i>SFRS1</i>           | -1,09 | 3,25E-02 | 1,63E-01 |
| <i>GPR50</i>           | 1,06  | 3,26E-02 | 1,63E-01 |
| <i>A_24_P920699</i>    | -1,11 | 3,27E-02 | 1,63E-01 |
| <i>A_24_P932266</i>    | -1,08 | 3,26E-02 | 1,63E-01 |
| <i>NIN</i>             | 1,06  | 3,27E-02 | 1,63E-01 |
| <i>THC2312748</i>      | 1,10  | 3,27E-02 | 1,63E-01 |
| <i>LOC149703</i>       | 1,07  | 3,27E-02 | 1,63E-01 |
| <i>ANKRD1</i>          | 1,12  | 3,27E-02 | 1,63E-01 |
| <i>FLJ90396</i>        | -1,09 | 3,27E-02 | 1,63E-01 |
| <i>THC2302184</i>      | -1,16 | 3,27E-02 | 1,63E-01 |
| <i>PCDHB7</i>          | -1,10 | 3,27E-02 | 1,63E-01 |
| <i>SAMD4A</i>          | 1,16  | 3,27E-02 | 1,63E-01 |
| <i>FLJ35779</i>        | -1,14 | 3,28E-02 | 1,63E-01 |
| <i>C8orf77</i>         | -1,11 | 3,28E-02 | 1,63E-01 |
| <i>FOXD3</i>           | 1,10  | 3,28E-02 | 1,63E-01 |
| <i>DLEU1</i>           | 1,16  | 3,28E-02 | 1,64E-01 |
| <i>ZNF346</i>          | -1,08 | 3,28E-02 | 1,64E-01 |
| <i>MYH7B</i>           | -1,10 | 3,28E-02 | 1,64E-01 |
| <i>IGFBPL1</i>         | 1,16  | 3,28E-02 | 1,64E-01 |
| <i>C9orf78</i>         | 1,08  | 3,28E-02 | 1,64E-01 |
| <i>THC2276324</i>      | -1,16 | 3,29E-02 | 1,64E-01 |
| <i>ZC3HC1</i>          | -1,06 | 3,29E-02 | 1,64E-01 |
| <i>DSCR1L1</i>         | 1,32  | 3,29E-02 | 1,64E-01 |
| <i>AK023040</i>        | -1,14 | 3,29E-02 | 1,64E-01 |
| <i>MORN1</i>           | 1,07  | 3,29E-02 | 1,64E-01 |
| <i>ZNF720</i>          | 1,08  | 3,29E-02 | 1,64E-01 |
| <i>BC084557</i>        | 1,12  | 3,29E-02 | 1,64E-01 |
| <i>C14orf124</i>       | -1,08 | 3,29E-02 | 1,64E-01 |
| <i>OPRS1</i>           | -1,10 | 3,29E-02 | 1,64E-01 |
| <i>MED12</i>           | -1,09 | 3,29E-02 | 1,64E-01 |
| <i>ING5</i>            | -1,14 | 3,30E-02 | 1,64E-01 |
| <i>THC2458855</i>      | -1,12 | 3,30E-02 | 1,64E-01 |
| <i>CR745651</i>        | 1,08  | 3,30E-02 | 1,64E-01 |
| <i>AL833303</i>        | 1,13  | 3,31E-02 | 1,64E-01 |
| <i>FLJ32255</i>        | 1,16  | 3,31E-02 | 1,64E-01 |

|                     |       |          |          |
|---------------------|-------|----------|----------|
| <i>PAFAH2</i>       | -1,08 | 3,31E-02 | 1,64E-01 |
| <i>TSSK1</i>        | -1,09 | 3,31E-02 | 1,65E-01 |
| <i>ETG05_66023</i>  | 1,05  | 3,31E-02 | 1,65E-01 |
| <i>C3orf25</i>      | 1,12  | 3,31E-02 | 1,65E-01 |
| <i>THC2309737</i>   | -1,15 | 3,32E-02 | 1,65E-01 |
| <i>TGFBR2</i>       | -1,13 | 3,32E-02 | 1,65E-01 |
| <i>LOC147080</i>    | -1,10 | 3,32E-02 | 1,65E-01 |
| <i>AT_nD_3</i>      | 1,04  | 3,32E-02 | 1,65E-01 |
| <i>THC2267302</i>   | 1,09  | 3,32E-02 | 1,65E-01 |
| <i>C1QTNF2</i>      | 1,14  | 3,32E-02 | 1,65E-01 |
| <i>AK024177</i>     | 1,08  | 3,32E-02 | 1,65E-01 |
| <i>AF090927</i>     | -1,12 | 3,32E-02 | 1,65E-01 |
| <i>A_32_P136614</i> | 1,10  | 3,32E-02 | 1,65E-01 |
| <i>AF318333</i>     | 1,12  | 3,32E-02 | 1,65E-01 |
| <i>NISCH</i>        | -1,11 | 3,33E-02 | 1,65E-01 |
| <i>A_24_P341176</i> | -1,07 | 3,33E-02 | 1,65E-01 |
| <i>KCTD12</i>       | 1,16  | 3,33E-02 | 1,65E-01 |
| <i>BCAS2</i>        | 1,11  | 3,33E-02 | 1,65E-01 |
| <i>P2RY11</i>       | 1,06  | 3,33E-02 | 1,65E-01 |
| <i>NELL1</i>        | -1,28 | 3,33E-02 | 1,65E-01 |
| <i>CYP4B1</i>       | -1,23 | 3,33E-02 | 1,65E-01 |
| <i>A_24_P369172</i> | -1,12 | 3,33E-02 | 1,65E-01 |
| <i>HSD17B7</i>      | -1,08 | 3,33E-02 | 1,65E-01 |
| <i>NGRN</i>         | 1,08  | 3,33E-02 | 1,65E-01 |
| <i>A_24_P247454</i> | 1,29  | 3,33E-02 | 1,65E-01 |
| <i>ZNF292</i>       | -1,19 | 3,34E-02 | 1,65E-01 |
| <i>BG259069</i>     | 1,10  | 3,34E-02 | 1,65E-01 |
| <i>A_24_P401124</i> | -1,08 | 3,34E-02 | 1,65E-01 |
| <i>BAD</i>          | 1,08  | 3,34E-02 | 1,65E-01 |
| <i>THC2317871</i>   | -1,10 | 3,34E-02 | 1,65E-01 |
| <i>H62159</i>       | -1,09 | 3,34E-02 | 1,65E-01 |
| <i>CAP2</i>         | 1,23  | 3,34E-02 | 1,65E-01 |
| <i>CYP24A1</i>      | 1,19  | 3,34E-02 | 1,65E-01 |
| <i>A_24_P152713</i> | 1,15  | 3,34E-02 | 1,65E-01 |
| <i>LRP1</i>         | -1,12 | 3,35E-02 | 1,66E-01 |
| <i>FCAR</i>         | 1,11  | 3,35E-02 | 1,66E-01 |
| <i>KIAA0553</i>     | -1,08 | 3,35E-02 | 1,66E-01 |
| <i>S71486</i>       | 1,15  | 3,35E-02 | 1,66E-01 |
| <i>AV739664</i>     | -1,18 | 3,35E-02 | 1,66E-01 |
| <i>BG208131</i>     | -1,10 | 3,35E-02 | 1,66E-01 |
| <i>A_32_P83973</i>  | -1,18 | 3,36E-02 | 1,66E-01 |
| <i>KIAA0423</i>     | -1,08 | 3,36E-02 | 1,66E-01 |
| <i>THC2337059</i>   | 1,10  | 3,36E-02 | 1,66E-01 |
| <i>CCL7</i>         | 1,24  | 3,36E-02 | 1,66E-01 |



|                        |       |          |          |
|------------------------|-------|----------|----------|
| <i>AGC1</i>            | 1,63  | 3,36E-02 | 1,66E-01 |
| <i>C1orf104</i>        | -1,08 | 3,36E-02 | 1,66E-01 |
| <i>RGPD2</i>           | 1,17  | 3,36E-02 | 1,66E-01 |
| <i>ELA2</i>            | 1,18  | 3,36E-02 | 1,66E-01 |
| <i>AK021985</i>        | -1,16 | 3,36E-02 | 1,66E-01 |
| <i>TMC1</i>            | 1,08  | 3,36E-02 | 1,66E-01 |
| <i>THC2345956</i>      | 1,19  | 3,37E-02 | 1,66E-01 |
| <i>UNQ739</i>          | 1,32  | 3,37E-02 | 1,66E-01 |
| <i>TRA@</i>            | -1,25 | 3,37E-02 | 1,66E-01 |
| <i>A_24_P170365</i>    | 1,09  | 3,37E-02 | 1,66E-01 |
| <i>EBF3</i>            | 1,16  | 3,37E-02 | 1,66E-01 |
| <i>ENST00000372899</i> | -1,11 | 3,37E-02 | 1,66E-01 |
| <i>A_24_P684799</i>    | 1,19  | 3,38E-02 | 1,66E-01 |
| <i>ALG11</i>           | 1,09  | 3,38E-02 | 1,66E-01 |
| <i>BC037528</i>        | -1,27 | 3,38E-02 | 1,66E-01 |
| <i>NGLY1</i>           | -1,08 | 3,38E-02 | 1,66E-01 |
| <i>THC2405729</i>      | 1,18  | 3,38E-02 | 1,66E-01 |
| <i>LOC651711</i>       | -1,21 | 3,38E-02 | 1,67E-01 |
| <i>SUHW2</i>           | -1,16 | 3,38E-02 | 1,67E-01 |
| <i>C18orf50</i>        | -1,09 | 3,38E-02 | 1,67E-01 |
| <i>DPH5</i>            | -1,11 | 3,38E-02 | 1,67E-01 |
| <i>ENST00000339980</i> | -1,10 | 3,39E-02 | 1,67E-01 |
| <i>AHSA2</i>           | -1,18 | 3,39E-02 | 1,67E-01 |
| <i>C6orf114</i>        | -1,12 | 3,39E-02 | 1,67E-01 |
| <i>SYNGAP1</i>         | 1,12  | 3,39E-02 | 1,67E-01 |
| <i>PNCK</i>            | 1,38  | 3,39E-02 | 1,67E-01 |
| <i>QPCT</i>            | -1,42 | 3,40E-02 | 1,67E-01 |
| <i>NEIL1</i>           | -1,14 | 3,40E-02 | 1,67E-01 |
| <i>STT3A</i>           | -1,13 | 3,40E-02 | 1,67E-01 |
| <i>USP47</i>           | -1,10 | 3,40E-02 | 1,67E-01 |
| <i>AK022252</i>        | -1,08 | 3,40E-02 | 1,67E-01 |
| <i>ALS2CR8</i>         | -1,08 | 3,40E-02 | 1,67E-01 |
| <i>A_24_P920081</i>    | 1,09  | 3,40E-02 | 1,67E-01 |
| <i>ENST00000308436</i> | -1,09 | 3,40E-02 | 1,67E-01 |
| <i>ACP1</i>            | -1,08 | 3,40E-02 | 1,67E-01 |
| <i>CYP3A7</i>          | -1,30 | 3,40E-02 | 1,67E-01 |
| <i>THC2436814</i>      | -1,11 | 3,41E-02 | 1,67E-01 |
| <i>C5</i>              | -1,09 | 3,41E-02 | 1,67E-01 |
| <i>ITGA2B</i>          | -1,08 | 3,41E-02 | 1,67E-01 |
| <i>PLK4</i>            | -1,08 | 3,41E-02 | 1,67E-01 |
| <i>ATP10D</i>          | 1,09  | 3,41E-02 | 1,67E-01 |
| <i>THC2317822</i>      | 1,11  | 3,40E-02 | 1,67E-01 |
| <i>GCSH</i>            | -1,12 | 3,41E-02 | 1,67E-01 |
| <i>GATA5</i>           | -1,44 | 3,41E-02 | 1,67E-01 |

|                     |       |          |          |
|---------------------|-------|----------|----------|
| <i>KSP37</i>        | -1,41 | 3,41E-02 | 1,67E-01 |
| <i>LHX3</i>         | -1,08 | 3,41E-02 | 1,67E-01 |
| <i>C3orf36</i>      | 1,07  | 3,41E-02 | 1,67E-01 |
| <i>BC034289</i>     | -1,11 | 3,41E-02 | 1,67E-01 |
| <i>ANKRD20A2</i>    | -1,16 | 3,41E-02 | 1,67E-01 |
| <i>COMT</i>         | 1,08  | 3,41E-02 | 1,67E-01 |
| <i>AK022044</i>     | -1,16 | 3,42E-02 | 1,67E-01 |
| <i>PIGN</i>         | -1,10 | 3,42E-02 | 1,67E-01 |
| <i>PLEKHG5</i>      | -1,10 | 3,42E-02 | 1,67E-01 |
| <i>TNFRSF1A</i>     | 1,11  | 3,42E-02 | 1,67E-01 |
| <i>PDZD2</i>        | -1,20 | 3,42E-02 | 1,67E-01 |
| <i>CAPN6</i>        | -1,71 | 3,42E-02 | 1,67E-01 |
| <i>A_32_P47019</i>  | -1,12 | 3,42E-02 | 1,67E-01 |
| <i>NARG2</i>        | -1,06 | 3,42E-02 | 1,67E-01 |
| <i>A_32_P101844</i> | 1,08  | 3,42E-02 | 1,67E-01 |
| <i>BAIAP2</i>       | 1,12  | 3,42E-02 | 1,67E-01 |
| <i>AF037219</i>     | -1,13 | 3,43E-02 | 1,68E-01 |
| <i>PLGLB2</i>       | -1,23 | 3,43E-02 | 1,68E-01 |
| <i>ROBO3</i>        | -1,19 | 3,43E-02 | 1,68E-01 |
| <i>ZNF333</i>       | -1,09 | 3,43E-02 | 1,68E-01 |
| <i>BC009800</i>     | -1,11 | 3,44E-02 | 1,68E-01 |
| <i>ATG9B</i>        | -1,10 | 3,44E-02 | 1,68E-01 |
| <i>C9orf139</i>     | -1,09 | 3,44E-02 | 1,68E-01 |
| <i>NFS1</i>         | -1,07 | 3,44E-02 | 1,68E-01 |
| <i>LCE5A</i>        | 1,07  | 3,44E-02 | 1,68E-01 |
| <i>BU616217</i>     | 1,08  | 3,44E-02 | 1,68E-01 |
| <i>CB852269</i>     | 1,20  | 3,44E-02 | 1,68E-01 |
| <i>ZRANB1</i>       | 1,09  | 3,44E-02 | 1,68E-01 |
| <i>PDGFB</i>        | 1,12  | 3,44E-02 | 1,68E-01 |
| <i>FAM121A</i>      | 1,11  | 3,45E-02 | 1,68E-01 |
| <i>TMEM99</i>       | -1,07 | 3,45E-02 | 1,68E-01 |
| <i>A_32_P154484</i> | -1,18 | 3,46E-02 | 1,69E-01 |
| <i>METTL5</i>       | 1,08  | 3,46E-02 | 1,69E-01 |
| <i>A_32_P55799</i>  | 1,08  | 3,46E-02 | 1,69E-01 |
| <i>BC024649</i>     | 1,09  | 3,46E-02 | 1,69E-01 |
| <i>IMPAD1</i>       | 1,13  | 3,46E-02 | 1,69E-01 |
| <i>AF086261</i>     | -1,20 | 3,46E-02 | 1,69E-01 |
| <i>THC2375648</i>   | -1,17 | 3,46E-02 | 1,69E-01 |
| <i>AK055252</i>     | -1,12 | 3,46E-02 | 1,69E-01 |
| <i>OPRD1</i>        | -1,09 | 3,46E-02 | 1,69E-01 |
| <i>ZNF26</i>        | -1,08 | 3,46E-02 | 1,69E-01 |
| <i>TMEM111</i>      | 1,06  | 3,46E-02 | 1,69E-01 |
| <i>SHC4</i>         | 1,24  | 3,46E-02 | 1,69E-01 |
| <i>SGEF</i>         | -1,15 | 3,46E-02 | 1,69E-01 |

|                        |       |          |          |
|------------------------|-------|----------|----------|
| <i>THC2338780</i>      | 1,49  | 3,47E-02 | 1,69E-01 |
| <i>GPR107</i>          | -1,06 | 3,47E-02 | 1,69E-01 |
| <i>NEFL</i>            | -1,47 | 3,47E-02 | 1,69E-01 |
| <i>ITCH</i>            | 1,05  | 3,47E-02 | 1,69E-01 |
| <i>CB306644</i>        | 1,06  | 3,47E-02 | 1,69E-01 |
| <i>A_32_P205913</i>    | -1,13 | 3,48E-02 | 1,69E-01 |
| <i>BC012876</i>        | -1,50 | 3,48E-02 | 1,69E-01 |
| <i>C20orf111</i>       | 1,11  | 3,48E-02 | 1,69E-01 |
| <i>AF119911</i>        | 1,15  | 3,48E-02 | 1,69E-01 |
| <i>CCDC102B</i>        | 1,17  | 3,48E-02 | 1,69E-01 |
| <i>THC2265846</i>      | -1,12 | 3,48E-02 | 1,69E-01 |
| <i>MFAP1</i>           | -1,08 | 3,49E-02 | 1,70E-01 |
| <i>LOC492311</i>       | -1,13 | 3,49E-02 | 1,70E-01 |
| <i>NRG2</i>            | -1,36 | 3,49E-02 | 1,70E-01 |
| <i>A_23_P169812</i>    | 1,10  | 3,49E-02 | 1,70E-01 |
| <i>A_24_P878737</i>    | 1,10  | 3,49E-02 | 1,70E-01 |
| <i>CCDC59</i>          | 1,11  | 3,49E-02 | 1,70E-01 |
| <i>ENST00000372602</i> | -1,11 | 3,50E-02 | 1,70E-01 |
| <i>MSRB3</i>           | 1,21  | 3,50E-02 | 1,70E-01 |
| <i>BC015449</i>        | -1,10 | 3,50E-02 | 1,70E-01 |
| <i>BC034006</i>        | 1,10  | 3,51E-02 | 1,70E-01 |
| <i>N4BP1</i>           | -1,07 | 3,51E-02 | 1,70E-01 |
| <i>AA972037</i>        | -1,08 | 3,51E-02 | 1,70E-01 |
| <i>COX4I1</i>          | 1,06  | 3,51E-02 | 1,70E-01 |
| <i>BC062758</i>        | 1,07  | 3,51E-02 | 1,70E-01 |
| <i>AL137530</i>        | -1,08 | 3,51E-02 | 1,70E-01 |
| <i>THC2432688</i>      | 1,08  | 3,51E-02 | 1,70E-01 |
| <i>AADACL1</i>         | 1,18  | 3,52E-02 | 1,71E-01 |
| <i>A_32_P42213</i>     | 1,08  | 3,52E-02 | 1,71E-01 |
| <i>CCDC17</i>          | -1,10 | 3,52E-02 | 1,71E-01 |
| <i>DEXI</i>            | -1,07 | 3,52E-02 | 1,71E-01 |
| <i>KIAA1729</i>        | -1,09 | 3,52E-02 | 1,71E-01 |
| <i>MAPK8</i>           | 1,09  | 3,52E-02 | 1,71E-01 |
| <i>A_24_P676259</i>    | 1,09  | 3,52E-02 | 1,71E-01 |
| <i>THC2241453</i>      | -1,13 | 3,53E-02 | 1,71E-01 |
| <i>ENST00000361329</i> | 1,08  | 3,53E-02 | 1,71E-01 |
| <i>A_24_P714140</i>    | 1,09  | 3,53E-02 | 1,71E-01 |
| <i>FLJ21062</i>        | 1,13  | 3,53E-02 | 1,71E-01 |
| <i>A_32_P205350</i>    | -1,19 | 3,53E-02 | 1,71E-01 |
| <i>PPIL6</i>           | 1,11  | 3,53E-02 | 1,71E-01 |
| <i>ZNF619</i>          | -1,09 | 3,53E-02 | 1,71E-01 |
| <i>MAT2A</i>           | 1,26  | 3,53E-02 | 1,71E-01 |
| <i>ENST00000321688</i> | -1,07 | 3,53E-02 | 1,71E-01 |
| <i>THC2364375</i>      | 1,11  | 3,54E-02 | 1,71E-01 |

|                 |       |          |          |
|-----------------|-------|----------|----------|
| A_23_P366468    | 1,12  | 3,54E-02 | 1,71E-01 |
| DACH1           | 1,25  | 3,54E-02 | 1,71E-01 |
| THC2402213      | 1,33  | 3,53E-02 | 1,71E-01 |
| A_24_P350060    | 1,29  | 3,54E-02 | 1,71E-01 |
| THC2248354      | -1,13 | 3,54E-02 | 1,71E-01 |
| RHBDD3          | -1,14 | 3,54E-02 | 1,71E-01 |
| THC2337923      | -1,17 | 3,54E-02 | 1,71E-01 |
| ENST00000310106 | -1,10 | 3,54E-02 | 1,71E-01 |
| SPRY1           | 1,29  | 3,54E-02 | 1,71E-01 |
| UBE2C           | -1,16 | 3,55E-02 | 1,71E-01 |
| PHB2            | -1,08 | 3,54E-02 | 1,71E-01 |
| CSRP2BP         | -1,10 | 3,55E-02 | 1,71E-01 |
| FST             | 1,18  | 3,55E-02 | 1,71E-01 |
| BE156557        | -1,11 | 3,55E-02 | 1,71E-01 |
| EPRS            | -1,09 | 3,55E-02 | 1,71E-01 |
| GSK3B           | 1,10  | 3,55E-02 | 1,71E-01 |
| THC2374512      | -1,14 | 3,56E-02 | 1,72E-01 |
| HIST1H2BD       | -1,08 | 3,56E-02 | 1,72E-01 |
| HIST3H2BB       | -1,08 | 3,56E-02 | 1,72E-01 |
| THC2345620      | -1,10 | 3,56E-02 | 1,72E-01 |
| ENST00000369291 | 1,11  | 3,56E-02 | 1,72E-01 |
| A_24_P126731    | 1,12  | 3,56E-02 | 1,72E-01 |
| VAMP4           | 1,08  | 3,57E-02 | 1,72E-01 |
| A_24_P814246    | 1,08  | 3,57E-02 | 1,72E-01 |
| SULT1A4         | -1,10 | 3,57E-02 | 1,72E-01 |
| LECT1           | -1,10 | 3,57E-02 | 1,72E-01 |
| DOK1            | -1,09 | 3,57E-02 | 1,72E-01 |
| PMS2CL          | -1,08 | 3,57E-02 | 1,72E-01 |
| ENST00000300996 | -1,06 | 3,57E-02 | 1,72E-01 |
| ICAM5           | 1,11  | 3,57E-02 | 1,72E-01 |
| FGF18           | 1,38  | 3,57E-02 | 1,72E-01 |
| MYH3            | 1,99  | 3,57E-02 | 1,72E-01 |
| HNRPUL2         | -1,07 | 3,58E-02 | 1,72E-01 |
| ZNF692          | -1,12 | 3,58E-02 | 1,72E-01 |
| BX090412        | -1,13 | 3,58E-02 | 1,72E-01 |
| CA5B            | 1,22  | 3,58E-02 | 1,72E-01 |
| TMEM149         | -1,18 | 3,58E-02 | 1,72E-01 |
| PUNC            | -1,15 | 3,58E-02 | 1,72E-01 |
| AF458587        | 1,08  | 3,58E-02 | 1,72E-01 |
| THC2409919      | -1,09 | 3,58E-02 | 1,72E-01 |
| WDR6            | -1,12 | 3,58E-02 | 1,72E-01 |
| AF086528        | -1,09 | 3,59E-02 | 1,72E-01 |
| PROCA1          | -1,08 | 3,59E-02 | 1,73E-01 |
| ZBTB1           | -1,12 | 3,59E-02 | 1,73E-01 |

|                        |       |          |          |
|------------------------|-------|----------|----------|
| <i>A_24_P401601</i>    | 1,18  | 3,59E-02 | 1,73E-01 |
| <i>PPIL1</i>           | -1,19 | 3,60E-02 | 1,73E-01 |
| <i>AK025326</i>        | -1,11 | 3,60E-02 | 1,73E-01 |
| <i>ENST00000370128</i> | -1,08 | 3,60E-02 | 1,73E-01 |
| <i>MRPL28</i>          | 1,07  | 3,60E-02 | 1,73E-01 |
| <i>THC2441234</i>      | 1,12  | 3,60E-02 | 1,73E-01 |
| <i>FLJ21963</i>        | 1,21  | 3,60E-02 | 1,73E-01 |
| <i>SLC7A5</i>          | 1,24  | 3,59E-02 | 1,73E-01 |
| <i>A_32_P44932</i>     | 1,26  | 3,59E-02 | 1,73E-01 |
| <i>C21orf89</i>        | -1,07 | 3,60E-02 | 1,73E-01 |
| <i>A_24_P942954</i>    | 1,09  | 3,60E-02 | 1,73E-01 |
| <i>LOC286272</i>       | -1,11 | 3,60E-02 | 1,73E-01 |
| <i>AK129849</i>        | -1,21 | 3,61E-02 | 1,73E-01 |
| <i>CD678339</i>        | -1,11 | 3,60E-02 | 1,73E-01 |
| <i>TFCP2</i>           | -1,08 | 3,61E-02 | 1,73E-01 |
| <i>L3MBTL4</i>         | -1,08 | 3,60E-02 | 1,73E-01 |
| <i>NRSN1</i>           | -1,07 | 3,60E-02 | 1,73E-01 |
| <i>CYP4A11</i>         | 1,06  | 3,60E-02 | 1,73E-01 |
| <i>MRPS18A</i>         | 1,06  | 3,60E-02 | 1,73E-01 |
| <i>LTB4R2</i>          | 1,08  | 3,61E-02 | 1,73E-01 |
| <i>LOC162073</i>       | 1,10  | 3,60E-02 | 1,73E-01 |
| <i>TM6SF1</i>          | 1,11  | 3,60E-02 | 1,73E-01 |
| <i>FMO4</i>            | -1,11 | 3,61E-02 | 1,73E-01 |
| <i>CDRT4</i>           | -1,09 | 3,61E-02 | 1,73E-01 |
| <i>TOR1A</i>           | 1,07  | 3,61E-02 | 1,73E-01 |
| <i>PASK</i>            | -1,07 | 3,61E-02 | 1,73E-01 |
| <i>ZNF407</i>          | -1,06 | 3,61E-02 | 1,73E-01 |
| <i>GPR25</i>           | 1,08  | 3,61E-02 | 1,73E-01 |
| <i>AK000013</i>        | -1,10 | 3,62E-02 | 1,73E-01 |
| <i>ZNF589</i>          | -1,15 | 3,62E-02 | 1,73E-01 |
| <i>KLHL22</i>          | -1,09 | 3,62E-02 | 1,73E-01 |
| <i>PPP2R5C</i>         | -1,06 | 3,62E-02 | 1,73E-01 |
| <i>TAF5L</i>           | 1,12  | 3,62E-02 | 1,73E-01 |
| <i>C1orf31</i>         | -1,09 | 3,62E-02 | 1,73E-01 |
| <i>PCOLCE</i>          | -1,30 | 3,63E-02 | 1,73E-01 |
| <i>KIF11</i>           | -1,07 | 3,64E-02 | 1,74E-01 |
| <i>NEBL</i>            | 1,25  | 3,64E-02 | 1,74E-01 |
| <i>GALNTL4</i>         | 1,16  | 3,64E-02 | 1,74E-01 |
| <i>KCNJ5</i>           | -1,11 | 3,64E-02 | 1,74E-01 |
| <i>MGC16703</i>        | -1,14 | 3,65E-02 | 1,74E-01 |
| <i>THC2407434</i>      | -1,11 | 3,65E-02 | 1,74E-01 |
| <i>GAPVD1</i>          | 1,06  | 3,64E-02 | 1,74E-01 |
| <i>UTP14C</i>          | -1,12 | 3,65E-02 | 1,74E-01 |
| <i>ENST00000371483</i> | -1,09 | 3,65E-02 | 1,74E-01 |

|                        |       |          |          |
|------------------------|-------|----------|----------|
| <i>RALY</i>            | 1,07  | 3,65E-02 | 1,74E-01 |
| <i>CHAT</i>            | 1,09  | 3,65E-02 | 1,74E-01 |
| <i>GIMAP4</i>          | -1,16 | 3,65E-02 | 1,74E-01 |
| <i>ZNF675</i>          | -1,16 | 3,65E-02 | 1,74E-01 |
| <i>A_24_P75718</i>     | 1,07  | 3,65E-02 | 1,74E-01 |
| <i>CCDC91</i>          | 1,10  | 3,65E-02 | 1,74E-01 |
| <i>IGSF6</i>           | -1,15 | 3,65E-02 | 1,74E-01 |
| <i>ZNF471</i>          | -1,11 | 3,65E-02 | 1,74E-01 |
| <i>CR623787</i>        | -1,24 | 3,66E-02 | 1,74E-01 |
| <i>TIFA</i>            | 1,16  | 3,66E-02 | 1,74E-01 |
| <i>A_32_P93792</i>     | 1,09  | 3,66E-02 | 1,74E-01 |
| <i>THC2381651</i>      | -1,07 | 3,66E-02 | 1,74E-01 |
| <i>CYP20A1</i>         | 1,08  | 3,66E-02 | 1,74E-01 |
| <i>CF528315</i>        | 1,09  | 3,66E-02 | 1,74E-01 |
| <i>A_32_P98854</i>     | 1,11  | 3,66E-02 | 1,74E-01 |
| <i>A_24_P161827</i>    | 1,20  | 3,66E-02 | 1,74E-01 |
| <i>ENST00000286794</i> | 1,08  | 3,67E-02 | 1,74E-01 |
| <i>AA399383</i>        | 1,09  | 3,67E-02 | 1,74E-01 |
| <i>PELP1</i>           | 1,07  | 3,67E-02 | 1,74E-01 |
| <i>KIR2DS2</i>         | -1,06 | 3,67E-02 | 1,75E-01 |
| <i>EDNRB</i>           | 1,15  | 3,67E-02 | 1,75E-01 |
| <i>CP</i>              | 1,36  | 3,67E-02 | 1,75E-01 |
| <i>APPBP2</i>          | -1,13 | 3,67E-02 | 1,75E-01 |
| <i>AY358804</i>        | 1,24  | 3,67E-02 | 1,75E-01 |
| <i>C7orf25</i>         | -1,11 | 3,68E-02 | 1,75E-01 |
| <i>A_24_P281514</i>    | 1,07  | 3,68E-02 | 1,75E-01 |
| <i>CENTG2</i>          | -1,07 | 3,68E-02 | 1,75E-01 |
| <i>ZNF501</i>          | -1,10 | 3,69E-02 | 1,75E-01 |
| <i>TAS2R40</i>         | -1,08 | 3,69E-02 | 1,75E-01 |
| <i>IL1B</i>            | 1,80  | 3,69E-02 | 1,75E-01 |
| <i>PIGL</i>            | -1,07 | 3,69E-02 | 1,75E-01 |
| <i>W05707</i>          | 1,11  | 3,70E-02 | 1,76E-01 |
| <i>EXTL2</i>           | -1,13 | 3,70E-02 | 1,76E-01 |
| <i>THC2437618</i>      | -1,12 | 3,70E-02 | 1,76E-01 |
| <i>ZNF66</i>           | -1,15 | 3,70E-02 | 1,76E-01 |
| <i>BC039246</i>        | -1,11 | 3,70E-02 | 1,76E-01 |
| <i>TOM1L1</i>          | 1,10  | 3,70E-02 | 1,76E-01 |
| <i>THSD1</i>           | -1,15 | 3,70E-02 | 1,76E-01 |
| <i>THC2350949</i>      | -1,20 | 3,70E-02 | 1,76E-01 |
| <i>AA045093</i>        | 1,08  | 3,70E-02 | 1,76E-01 |
| <i>DSCR9</i>           | -1,12 | 3,71E-02 | 1,76E-01 |
| <i>THC2380706</i>      | -1,11 | 3,71E-02 | 1,76E-01 |
| <i>BX100717</i>        | -1,16 | 3,71E-02 | 1,76E-01 |
| <i>AA418814</i>        | -1,16 | 3,71E-02 | 1,76E-01 |

|                     |       |          |          |
|---------------------|-------|----------|----------|
| <i>SIDT2</i>        | -1,11 | 3,71E-02 | 1,76E-01 |
| <i>CDC42EP5</i>     | 1,07  | 3,71E-02 | 1,76E-01 |
| <i>CDR1</i>         | 1,21  | 3,71E-02 | 1,76E-01 |
| <i>LOXL1</i>        | 1,22  | 3,71E-02 | 1,76E-01 |
| <i>HR</i>           | 1,24  | 3,71E-02 | 1,76E-01 |
| <i>BLM</i>          | -1,10 | 3,71E-02 | 1,76E-01 |
| <i>G36726</i>       | 1,14  | 3,72E-02 | 1,76E-01 |
| <i>DCTD</i>         | -1,08 | 3,72E-02 | 1,76E-01 |
| <i>A_23_P72252</i>  | -1,26 | 3,72E-02 | 1,76E-01 |
| <i>TMEM33</i>       | 1,07  | 3,72E-02 | 1,76E-01 |
| <i>CSK</i>          | -1,09 | 3,72E-02 | 1,76E-01 |
| <i>BX460543</i>     | -1,08 | 3,72E-02 | 1,76E-01 |
| <i>THC2348698</i>   | -1,15 | 3,73E-02 | 1,76E-01 |
| <i>mimitin</i>      | 1,07  | 3,73E-02 | 1,76E-01 |
| <i>PLUNC</i>        | 1,09  | 3,73E-02 | 1,76E-01 |
| <i>VAV1</i>         | -1,15 | 3,73E-02 | 1,76E-01 |
| <i>NOTCH2</i>       | -1,14 | 3,73E-02 | 1,76E-01 |
| <i>U78519</i>       | -1,08 | 3,73E-02 | 1,76E-01 |
| <i>A_24_P647732</i> | 1,08  | 3,73E-02 | 1,76E-01 |
| <i>SULT4A1</i>      | 1,08  | 3,73E-02 | 1,76E-01 |
| <i>CR627133</i>     | -1,12 | 3,74E-02 | 1,77E-01 |
| <i>HPN</i>          | -1,09 | 3,74E-02 | 1,77E-01 |
| <i>AF113685</i>     | 1,12  | 3,74E-02 | 1,77E-01 |
| <i>ZNF553</i>       | -1,13 | 3,75E-02 | 1,77E-01 |
| <i>ANKK1</i>        | -1,11 | 3,75E-02 | 1,77E-01 |
| <i>THC2348290</i>   | -1,11 | 3,75E-02 | 1,77E-01 |
| <i>EPB41L4A</i>     | 1,09  | 3,75E-02 | 1,77E-01 |
| <i>TMEM16H</i>      | 1,11  | 3,75E-02 | 1,77E-01 |
| <i>CB111670</i>     | 1,15  | 3,75E-02 | 1,77E-01 |
| <i>BG944303</i>     | 1,08  | 3,75E-02 | 1,77E-01 |
| <i>DUSP3</i>        | 1,15  | 3,75E-02 | 1,77E-01 |
| <i>ABCC9</i>        | 1,24  | 3,75E-02 | 1,77E-01 |
| <i>A_24_P916876</i> | -1,10 | 3,76E-02 | 1,77E-01 |
| <i>PTAR1</i>        | -1,09 | 3,76E-02 | 1,77E-01 |
| <i>CARD4</i>        | 1,10  | 3,76E-02 | 1,77E-01 |
| <i>MPZ</i>          | 1,12  | 3,76E-02 | 1,77E-01 |
| <i>THC2366170</i>   | -1,15 | 3,76E-02 | 1,77E-01 |
| <i>LOC440498</i>    | -1,13 | 3,76E-02 | 1,77E-01 |
| <i>THC2405620</i>   | -1,14 | 3,76E-02 | 1,77E-01 |
| <i>ZNF672</i>       | 1,08  | 3,76E-02 | 1,77E-01 |
| <i>DPY19L4</i>      | -1,14 | 3,77E-02 | 1,77E-01 |
| <i>THC2406786</i>   | -1,09 | 3,77E-02 | 1,78E-01 |
| <i>C11orf31</i>     | -1,07 | 3,77E-02 | 1,78E-01 |
| <i>A_24_P417922</i> | 1,07  | 3,77E-02 | 1,78E-01 |

|                        |       |          |          |
|------------------------|-------|----------|----------|
| <i>THC2446811</i>      | -1,26 | 3,77E-02 | 1,78E-01 |
| <i>CCL5</i>            | -1,32 | 3,78E-02 | 1,78E-01 |
| <i>TSHZ1</i>           | -1,09 | 3,78E-02 | 1,78E-01 |
| <i>NPAS1</i>           | -1,09 | 3,78E-02 | 1,78E-01 |
| <i>LOC255783</i>       | 1,07  | 3,79E-02 | 1,78E-01 |
| <i>THC2313673</i>      | 1,13  | 3,79E-02 | 1,78E-01 |
| <i>MFSD5</i>           | -1,08 | 3,79E-02 | 1,78E-01 |
| <i>THC2441398</i>      | 1,14  | 3,79E-02 | 1,78E-01 |
| <i>A_24_P915675</i>    | 1,14  | 3,79E-02 | 1,78E-01 |
| <i>TXNDC3</i>          | -1,12 | 3,80E-02 | 1,78E-01 |
| <i>NDUFS6</i>          | 1,08  | 3,80E-02 | 1,78E-01 |
| <i>FLJ21986</i>        | 1,19  | 3,80E-02 | 1,78E-01 |
| <i>HEAB</i>            | -1,08 | 3,80E-02 | 1,79E-01 |
| <i>ENST00000314123</i> | 1,06  | 3,80E-02 | 1,79E-01 |
| <i>AK125162</i>        | 1,36  | 3,80E-02 | 1,79E-01 |
| <i>BC013295</i>        | 1,10  | 3,80E-02 | 1,79E-01 |
| <i>CDYL2</i>           | 1,16  | 3,80E-02 | 1,79E-01 |
| <i>PRUNE</i>           | -1,08 | 3,81E-02 | 1,79E-01 |
| <i>AF289593</i>        | -1,07 | 3,81E-02 | 1,79E-01 |
| <i>AK096041</i>        | 1,09  | 3,81E-02 | 1,79E-01 |
| <i>KIAA1652</i>        | -1,14 | 3,81E-02 | 1,79E-01 |
| <i>EDA2R</i>           | -1,10 | 3,81E-02 | 1,79E-01 |
| <i>CHMP2A</i>          | 1,06  | 3,82E-02 | 1,79E-01 |
| <i>C20orf46</i>        | 1,12  | 3,82E-02 | 1,79E-01 |
| <i>ENST00000292015</i> | 1,09  | 3,82E-02 | 1,79E-01 |
| <i>MSH3</i>            | 1,09  | 3,82E-02 | 1,79E-01 |
| <i>RHOBTB1</i>         | 1,23  | 3,82E-02 | 1,79E-01 |
| <i>COX7B</i>           | 1,12  | 3,82E-02 | 1,79E-01 |
| <i>ZNF498</i>          | -1,08 | 3,83E-02 | 1,79E-01 |
| <i>RNASE6</i>          | -1,21 | 3,83E-02 | 1,79E-01 |
| <i>ENST00000280576</i> | -1,11 | 3,83E-02 | 1,79E-01 |
| <i>ZBTB2</i>           | 1,10  | 3,83E-02 | 1,79E-01 |
| <i>BU625329</i>        | 1,09  | 3,83E-02 | 1,80E-01 |
| <i>PPAP2B</i>          | -1,27 | 3,83E-02 | 1,80E-01 |
| <i>TUBGCP5</i>         | -1,08 | 3,83E-02 | 1,80E-01 |
| <i>DAB2</i>            | -1,15 | 3,84E-02 | 1,80E-01 |
| <i>DB527271</i>        | -1,13 | 3,84E-02 | 1,80E-01 |
| <i>ZNF639</i>          | -1,11 | 3,83E-02 | 1,80E-01 |
| <i>ENST00000357802</i> | -1,10 | 3,84E-02 | 1,80E-01 |
| <i>SLC35D3</i>         | -1,09 | 3,84E-02 | 1,80E-01 |
| <i>ZNFX1</i>           | 1,07  | 3,84E-02 | 1,80E-01 |
| <i>AK026225</i>        | 1,16  | 3,84E-02 | 1,80E-01 |
| <i>TNFRSF21</i>        | 1,18  | 3,84E-02 | 1,80E-01 |
| <i>THC2434761</i>      | 1,07  | 3,84E-02 | 1,80E-01 |



|                        |       |          |          |
|------------------------|-------|----------|----------|
| <i>KLHL23</i>          | -1,20 | 3,84E-02 | 1,80E-01 |
| <i>NUDT9</i>           | -1,09 | 3,84E-02 | 1,80E-01 |
| <i>UBE2MP1</i>         | 1,07  | 3,84E-02 | 1,80E-01 |
| <i>FAM24B</i>          | -1,15 | 3,85E-02 | 1,80E-01 |
| <i>ENST00000369308</i> | -1,11 | 3,85E-02 | 1,80E-01 |
| <i>THC2317467</i>      | 1,09  | 3,85E-02 | 1,80E-01 |
| <i>PTGFR</i>           | -1,24 | 3,85E-02 | 1,80E-01 |
| <i>IARS</i>            | -1,13 | 3,85E-02 | 1,80E-01 |
| <i>FKBP2</i>           | -1,10 | 3,85E-02 | 1,80E-01 |
| <i>BRCC3</i>           | -1,07 | 3,85E-02 | 1,80E-01 |
| <i>CHMP2B</i>          | 1,08  | 3,85E-02 | 1,80E-01 |
| <i>CEACAM6</i>         | -1,40 | 3,86E-02 | 1,80E-01 |
| <i>THC2315164</i>      | -1,09 | 3,86E-02 | 1,80E-01 |
| <i>A_24_P461676</i>    | 1,08  | 3,86E-02 | 1,80E-01 |
| <i>LOC441368</i>       | 1,07  | 3,86E-02 | 1,80E-01 |
| <i>INPP5E</i>          | -1,08 | 3,86E-02 | 1,80E-01 |
| <i>CYP1B1</i>          | -1,34 | 3,86E-02 | 1,80E-01 |
| <i>LOC283587</i>       | -1,07 | 3,86E-02 | 1,80E-01 |
| <i>AA910154</i>        | 1,11  | 3,86E-02 | 1,80E-01 |
| <i>AK021614</i>        | -1,11 | 3,87E-02 | 1,80E-01 |
| <i>THC2324121</i>      | -1,14 | 3,87E-02 | 1,80E-01 |
| <i>ALG2</i>            | -1,13 | 3,87E-02 | 1,80E-01 |
| <i>LOC646676</i>       | -1,12 | 3,87E-02 | 1,80E-01 |
| <i>PCDHGA2</i>         | -1,11 | 3,87E-02 | 1,80E-01 |
| <i>A_32_P98574</i>     | -1,10 | 3,87E-02 | 1,80E-01 |
| <i>NEUROD1</i>         | 1,06  | 3,87E-02 | 1,80E-01 |
| <i>ENST00000367003</i> | 1,10  | 3,87E-02 | 1,80E-01 |
| <i>NALP1</i>           | 1,16  | 3,87E-02 | 1,80E-01 |
| <i>A_24_P24645</i>     | 1,24  | 3,87E-02 | 1,80E-01 |
| <i>HDAC2</i>           | -1,07 | 3,87E-02 | 1,80E-01 |
| <i>KIAA1219</i>        | -1,07 | 3,88E-02 | 1,80E-01 |
| <i>A_24_P410256</i>    | 1,10  | 3,88E-02 | 1,80E-01 |
| <i>RYBP</i>            | 1,11  | 3,88E-02 | 1,80E-01 |
| <i>AVP</i>             | 1,11  | 3,88E-02 | 1,80E-01 |
| <i>AK130400</i>        | 1,09  | 3,88E-02 | 1,80E-01 |
| <i>SCAMP4</i>          | -1,08 | 3,88E-02 | 1,81E-01 |
| <i>THC2338292</i>      | -1,08 | 3,88E-02 | 1,81E-01 |
| <i>ARL6IP2</i>         | 1,10  | 3,88E-02 | 1,81E-01 |
| <i>A_24_P770494</i>    | 1,11  | 3,88E-02 | 1,81E-01 |
| <i>ATP5I</i>           | 1,08  | 3,89E-02 | 1,81E-01 |
| <i>ENST00000238616</i> | -1,13 | 3,89E-02 | 1,81E-01 |
| <i>A_32_P92922</i>     | -1,08 | 3,89E-02 | 1,81E-01 |
| <i>LOC642826</i>       | -1,07 | 3,89E-02 | 1,81E-01 |
| <i>IFNAR2</i>          | 1,07  | 3,89E-02 | 1,81E-01 |

|                        |       |          |          |
|------------------------|-------|----------|----------|
| <i>GABRB1</i>          | 1,13  | 3,89E-02 | 1,81E-01 |
| <i>LOC283177</i>       | 1,13  | 3,89E-02 | 1,81E-01 |
| <i>FLJ20699</i>        | -1,09 | 3,90E-02 | 1,81E-01 |
| <i>L12234</i>          | 1,24  | 3,90E-02 | 1,81E-01 |
| <i>SNIP</i>            | 1,15  | 3,90E-02 | 1,81E-01 |
| <i>S80491</i>          | -1,09 | 3,90E-02 | 1,81E-01 |
| <i>RAD50</i>           | -1,08 | 3,91E-02 | 1,81E-01 |
| <i>A_24_P464963</i>    | 1,08  | 3,91E-02 | 1,81E-01 |
| <i>THC2375753</i>      | -1,25 | 3,91E-02 | 1,81E-01 |
| <i>HS3ST3B1</i>        | 1,08  | 3,91E-02 | 1,81E-01 |
| <i>GPR92</i>           | -1,14 | 3,92E-02 | 1,82E-01 |
| <i>A_32_P197899</i>    | -1,09 | 3,92E-02 | 1,82E-01 |
| <i>RIPK3</i>           | 1,15  | 3,92E-02 | 1,82E-01 |
| <i>A_32_P132422</i>    | 1,08  | 3,92E-02 | 1,82E-01 |
| <i>BNIP2</i>           | 1,09  | 3,92E-02 | 1,82E-01 |
| <i>A_24_P399341</i>    | -1,44 | 3,92E-02 | 1,82E-01 |
| <i>ENST00000338327</i> | -1,13 | 3,93E-02 | 1,82E-01 |
| <i>AK057515</i>        | 1,09  | 3,92E-02 | 1,82E-01 |
| <i>CRYAA</i>           | 1,09  | 3,92E-02 | 1,82E-01 |
| <i>A_23_P79383</i>     | 1,11  | 3,92E-02 | 1,82E-01 |
| <i>AF085913</i>        | 1,17  | 3,92E-02 | 1,82E-01 |
| <i>BX098411</i>        | -1,09 | 3,93E-02 | 1,82E-01 |
| <i>HIST1H2AG</i>       | 1,10  | 3,93E-02 | 1,82E-01 |
| <i>FGG</i>             | -1,08 | 3,93E-02 | 1,82E-01 |
| <i>DIAPH1</i>          | 1,09  | 3,93E-02 | 1,82E-01 |
| <i>BX344068</i>        | -1,12 | 3,93E-02 | 1,82E-01 |
| <i>AK055302</i>        | -1,16 | 3,93E-02 | 1,82E-01 |
| <i>RPLP2</i>           | -1,07 | 3,94E-02 | 1,82E-01 |
| <i>SPIN</i>            | -1,09 | 3,94E-02 | 1,82E-01 |
| <i>THC2271174</i>      | 1,13  | 3,94E-02 | 1,82E-01 |
| <i>A2BP1</i>           | -1,24 | 3,94E-02 | 1,82E-01 |
| <i>A_32_P186678</i>    | -1,20 | 3,94E-02 | 1,82E-01 |
| <i>KDELC2</i>          | 1,16  | 3,94E-02 | 1,82E-01 |
| <i>HS6ST1</i>          | -1,10 | 3,95E-02 | 1,82E-01 |
| <i>LIM2</i>            | -1,08 | 3,95E-02 | 1,82E-01 |
| <i>C14orf10</i>        | 1,06  | 3,95E-02 | 1,82E-01 |
| <i>KCTD20</i>          | 1,08  | 3,95E-02 | 1,83E-01 |
| <i>ENST00000316577</i> | -1,10 | 3,95E-02 | 1,83E-01 |
| <i>AA076992</i>        | -1,08 | 3,95E-02 | 1,83E-01 |
| <i>C14orf156</i>       | 1,07  | 3,95E-02 | 1,83E-01 |
| <i>AF116702</i>        | 1,14  | 3,95E-02 | 1,83E-01 |
| <i>THC2280849</i>      | 1,21  | 3,95E-02 | 1,83E-01 |
| <i>KLKB1</i>           | -1,12 | 3,96E-02 | 1,83E-01 |
| <i>THOC5</i>           | 1,10  | 3,96E-02 | 1,83E-01 |

|                        |       |          |          |
|------------------------|-------|----------|----------|
| <i>HRASLS3</i>         | 1,17  | 3,96E-02 | 1,83E-01 |
| <i>A_32_P204565</i>    | -1,13 | 3,96E-02 | 1,83E-01 |
| <i>LOC283868</i>       | 1,09  | 3,97E-02 | 1,83E-01 |
| <i>TMEM11</i>          | -1,06 | 3,97E-02 | 1,83E-01 |
| <i>MGC52000</i>        | -1,09 | 3,97E-02 | 1,83E-01 |
| <i>A_24_P891116</i>    | -1,07 | 3,97E-02 | 1,83E-01 |
| <i>AI885257</i>        | 1,08  | 3,97E-02 | 1,83E-01 |
| <i>AK094860</i>        | -1,06 | 3,97E-02 | 1,83E-01 |
| <i>CEPT1</i>           | -1,08 | 3,97E-02 | 1,83E-01 |
| <i>SRA1</i>            | 1,13  | 3,97E-02 | 1,83E-01 |
| <i>A_23_P170719</i>    | 1,49  | 3,98E-02 | 1,83E-01 |
| <i>OTUD4</i>           | 1,09  | 3,98E-02 | 1,83E-01 |
| <i>ENST00000373899</i> | -1,09 | 3,98E-02 | 1,84E-01 |
| <i>CD518214</i>        | 1,07  | 3,98E-02 | 1,84E-01 |
| <i>LOC390427</i>       | 1,09  | 3,98E-02 | 1,84E-01 |
| <i>BE644770</i>        | -1,09 | 3,99E-02 | 1,84E-01 |
| <i>PPP1R1A</i>         | 1,32  | 3,99E-02 | 1,84E-01 |
| <i>ENST00000327436</i> | -1,11 | 3,99E-02 | 1,84E-01 |
| <i>C12orf5</i>         | 1,13  | 3,99E-02 | 1,84E-01 |
| <i>NDUFS2</i>          | 1,09  | 4,00E-02 | 1,84E-01 |
| <i>A_24_P401051</i>    | 1,12  | 4,00E-02 | 1,84E-01 |
| <i>ENST00000333309</i> | 1,15  | 4,00E-02 | 1,84E-01 |
| <i>BX641010</i>        | -1,18 | 4,00E-02 | 1,84E-01 |
| <i>ZNF513</i>          | 1,09  | 4,00E-02 | 1,84E-01 |
| <i>NEK10</i>           | 1,14  | 4,00E-02 | 1,84E-01 |
| <i>PSG8</i>            | 1,06  | 4,00E-02 | 1,84E-01 |
| <i>MEFV</i>            | 1,11  | 4,00E-02 | 1,84E-01 |
| <i>AK026140</i>        | 1,12  | 4,00E-02 | 1,84E-01 |
| <i>HMGCLL1</i>         | -1,17 | 4,01E-02 | 1,84E-01 |
| <i>NOP17</i>           | 1,07  | 4,01E-02 | 1,84E-01 |
| <i>A_32_P108420</i>    | -1,18 | 4,01E-02 | 1,84E-01 |
| <i>ENST00000375169</i> | -1,10 | 4,01E-02 | 1,84E-01 |
| <i>RPS4X</i>           | -1,07 | 4,02E-02 | 1,84E-01 |
| <i>SLC39A8</i>         | -1,19 | 4,02E-02 | 1,85E-01 |
| <i>THC2280557</i>      | -1,12 | 4,02E-02 | 1,85E-01 |
| <i>A_24_P212875</i>    | 1,11  | 4,02E-02 | 1,85E-01 |
| <i>LOC441108</i>       | -1,12 | 4,03E-02 | 1,85E-01 |
| <i>CAPS2</i>           | -1,11 | 4,03E-02 | 1,85E-01 |
| <i>KLRK1</i>           | -1,09 | 4,03E-02 | 1,85E-01 |
| <i>ENST00000322446</i> | 1,16  | 4,03E-02 | 1,85E-01 |
| <i>MORC3</i>           | -1,12 | 4,03E-02 | 1,85E-01 |
| <i>BM980603</i>        | -1,10 | 4,03E-02 | 1,85E-01 |
| <i>A_24_P349489</i>    | 1,16  | 4,03E-02 | 1,85E-01 |
| <i>RPL10</i>           | -1,07 | 4,03E-02 | 1,85E-01 |

|                 |       |          |          |
|-----------------|-------|----------|----------|
| NDUFA6          | 1,12  | 4,03E-02 | 1,85E-01 |
| A_32_P24080     | 1,08  | 4,04E-02 | 1,85E-01 |
| SLCO1C1         | 1,08  | 4,04E-02 | 1,85E-01 |
| AK124939        | 1,07  | 4,04E-02 | 1,85E-01 |
| AK126415        | -1,09 | 4,04E-02 | 1,85E-01 |
| BC031013        | -1,13 | 4,04E-02 | 1,85E-01 |
| THC2348985      | 1,17  | 4,04E-02 | 1,85E-01 |
| DKFZP686E2158   | -1,12 | 4,05E-02 | 1,85E-01 |
| A_24_P928713    | -1,08 | 4,05E-02 | 1,85E-01 |
| A_23_P30411     | 1,08  | 4,04E-02 | 1,85E-01 |
| THC2314544      | 1,09  | 4,05E-02 | 1,85E-01 |
| KRT19           | -1,50 | 4,05E-02 | 1,85E-01 |
| TRIM50          | -1,11 | 4,05E-02 | 1,85E-01 |
| ENST00000333131 | 1,06  | 4,05E-02 | 1,85E-01 |
| GPR158          | 1,10  | 4,05E-02 | 1,85E-01 |
| THC2287911      | 1,20  | 4,05E-02 | 1,85E-01 |
| KRT18           | 1,28  | 4,06E-02 | 1,86E-01 |
| BM968705        | 1,11  | 4,06E-02 | 1,86E-01 |
| KDR             | -1,19 | 4,07E-02 | 1,86E-01 |
| FLJ10815        | -1,10 | 4,07E-02 | 1,86E-01 |
| WDR57           | -1,08 | 4,07E-02 | 1,86E-01 |
| TRAK2           | 1,09  | 4,07E-02 | 1,86E-01 |
| A_24_P941954    | 1,13  | 4,07E-02 | 1,86E-01 |
| ZNF304          | -1,09 | 4,07E-02 | 1,86E-01 |
| PDXK            | -1,08 | 4,07E-02 | 1,86E-01 |
| CFH             | 1,36  | 4,07E-02 | 1,86E-01 |
| CD653123        | -1,17 | 4,07E-02 | 1,86E-01 |
| ANP32A          | 1,07  | 4,07E-02 | 1,86E-01 |
| HERPUD1         | -1,12 | 4,08E-02 | 1,86E-01 |
| CD244           | -1,07 | 4,08E-02 | 1,86E-01 |
| SLC5A9          | -1,07 | 4,08E-02 | 1,86E-01 |
| TMEM10          | 1,06  | 4,09E-02 | 1,87E-01 |
| TMEM151         | 1,07  | 4,09E-02 | 1,87E-01 |
| PANX2           | 1,07  | 4,10E-02 | 1,87E-01 |
| AF090938        | 1,12  | 4,10E-02 | 1,87E-01 |
| AF090890        | -1,09 | 4,10E-02 | 1,87E-01 |
| CTDSP1          | -1,09 | 4,10E-02 | 1,87E-01 |
| MON2            | -1,07 | 4,10E-02 | 1,87E-01 |
| OPN4            | 1,08  | 4,10E-02 | 1,87E-01 |
| A_24_P161345    | 1,11  | 4,10E-02 | 1,87E-01 |
| NAT13           | 1,12  | 4,10E-02 | 1,87E-01 |
| H2-ALPHA        | 1,16  | 4,10E-02 | 1,87E-01 |
| TNRC6C          | 1,11  | 4,10E-02 | 1,87E-01 |
| NKX2-5          | 1,08  | 4,11E-02 | 1,87E-01 |

|                        |       |          |          |
|------------------------|-------|----------|----------|
| <i>PHF17</i>           | -1,13 | 4,11E-02 | 1,87E-01 |
| <i>GPR180</i>          | -1,11 | 4,11E-02 | 1,87E-01 |
| <i>THC2292455</i>      | -1,20 | 4,11E-02 | 1,87E-01 |
| <i>A_24_P409681</i>    | -1,07 | 4,11E-02 | 1,87E-01 |
| <i>A_24_P161317</i>    | -1,23 | 4,12E-02 | 1,87E-01 |
| <i>AI970518</i>        | 1,07  | 4,12E-02 | 1,87E-01 |
| <i>IGSF4</i>           | 1,33  | 4,12E-02 | 1,88E-01 |
| <i>ENST00000320205</i> | 1,19  | 4,12E-02 | 1,88E-01 |
| <i>AF351612</i>        | 1,18  | 4,12E-02 | 1,88E-01 |
| <i>ENST00000379534</i> | -1,12 | 4,13E-02 | 1,88E-01 |
| <i>TUG1</i>            | -1,08 | 4,13E-02 | 1,88E-01 |
| <i>ZNF236</i>          | -1,07 | 4,12E-02 | 1,88E-01 |
| <i>A_24_P324250</i>    | 1,10  | 4,13E-02 | 1,88E-01 |
| <i>A_32_P191141</i>    | -1,18 | 4,13E-02 | 1,88E-01 |
| <i>NAPSB</i>           | -1,18 | 4,13E-02 | 1,88E-01 |
| <i>BC054888</i>        | -1,08 | 4,13E-02 | 1,88E-01 |
| <i>A_23_P124699</i>    | 1,09  | 4,13E-02 | 1,88E-01 |
| <i>THC2277187</i>      | -1,24 | 4,13E-02 | 1,88E-01 |
| <i>A_24_P930337</i>    | 1,17  | 4,13E-02 | 1,88E-01 |
| <i>L10374</i>          | 1,31  | 4,13E-02 | 1,88E-01 |
| <i>BANP</i>            | -1,09 | 4,14E-02 | 1,88E-01 |
| <i>ALS2CR19</i>        | 1,15  | 4,14E-02 | 1,88E-01 |
| <i>CENPC1</i>          | 1,10  | 4,14E-02 | 1,88E-01 |
| <i>ISG20</i>           | 1,22  | 4,14E-02 | 1,88E-01 |
| <i>ITGAX</i>           | -1,18 | 4,14E-02 | 1,88E-01 |
| <i>TAC3</i>            | -1,10 | 4,14E-02 | 1,88E-01 |
| <i>FXVD6</i>           | -1,25 | 4,15E-02 | 1,88E-01 |
| <i>A_24_P170025</i>    | 1,06  | 4,15E-02 | 1,88E-01 |
| <i>THC2340715</i>      | 1,08  | 4,15E-02 | 1,88E-01 |
| <i>TMEM160</i>         | 1,08  | 4,15E-02 | 1,88E-01 |
| <i>A_24_P341058</i>    | 1,11  | 4,15E-02 | 1,88E-01 |
| <i>DPP8</i>            | -1,07 | 4,16E-02 | 1,88E-01 |
| <i>AK055621</i>        | 1,30  | 4,16E-02 | 1,88E-01 |
| <i>ENST00000283657</i> | -1,63 | 4,16E-02 | 1,89E-01 |
| <i>KCND1</i>           | -1,10 | 4,16E-02 | 1,89E-01 |
| <i>A_32_P5995</i>      | 1,06  | 4,16E-02 | 1,89E-01 |
| <i>RWDD4A</i>          | -1,07 | 4,16E-02 | 1,89E-01 |
| <i>AF161369</i>        | 1,12  | 4,16E-02 | 1,89E-01 |
| <i>A_24_P615462</i>    | 1,29  | 4,16E-02 | 1,89E-01 |
| <i>FLJ21820</i>        | -1,12 | 4,16E-02 | 1,89E-01 |
| <i>A_32_P9707</i>      | 1,09  | 4,16E-02 | 1,89E-01 |
| <i>REXO1</i>           | 1,07  | 4,16E-02 | 1,89E-01 |
| <i>ZFY</i>             | 1,10  | 4,16E-02 | 1,89E-01 |
| <i>SPG3A</i>           | 1,11  | 4,17E-02 | 1,89E-01 |

|                        |       |          |          |
|------------------------|-------|----------|----------|
| <i>GALM</i>            | -1,15 | 4,17E-02 | 1,89E-01 |
| <i>PDSS2</i>           | -1,09 | 4,17E-02 | 1,89E-01 |
| <i>FLJ32742</i>        | 1,07  | 4,17E-02 | 1,89E-01 |
| <i>BCAR1</i>           | 1,09  | 4,17E-02 | 1,89E-01 |
| <i>FARP1</i>           | 1,11  | 4,17E-02 | 1,89E-01 |
| <i>PKHD1</i>           | -1,07 | 4,17E-02 | 1,89E-01 |
| <i>TMSB4Y</i>          | -1,09 | 4,17E-02 | 1,89E-01 |
| <i>TOP3A</i>           | -1,08 | 4,18E-02 | 1,89E-01 |
| <i>FBXW2</i>           | 1,06  | 4,18E-02 | 1,89E-01 |
| <i>TNNI1</i>           | 1,08  | 4,18E-02 | 1,89E-01 |
| <i>DDX19B</i>          | 1,06  | 4,18E-02 | 1,89E-01 |
| <i>CHRM3</i>           | 1,11  | 4,18E-02 | 1,89E-01 |
| <i>NPR2</i>            | -1,14 | 4,18E-02 | 1,89E-01 |
| <i>YKT6</i>            | 1,09  | 4,18E-02 | 1,89E-01 |
| <i>AOX1</i>            | -1,23 | 4,18E-02 | 1,89E-01 |
| <i>TBC1D22A</i>        | 1,08  | 4,18E-02 | 1,89E-01 |
| <i>LTBR</i>            | 1,09  | 4,19E-02 | 1,89E-01 |
| <i>YWHAG</i>           | 1,09  | 4,19E-02 | 1,89E-01 |
| <i>MYADM</i>           | 1,18  | 4,19E-02 | 1,89E-01 |
| <i>CABP7</i>           | 1,42  | 4,19E-02 | 1,89E-01 |
| <i>PCDHA5</i>          | -1,13 | 4,19E-02 | 1,89E-01 |
| <i>THC2338707</i>      | -1,10 | 4,19E-02 | 1,89E-01 |
| <i>WBP11</i>           | 1,07  | 4,19E-02 | 1,89E-01 |
| <i>ENST00000278949</i> | 1,19  | 4,20E-02 | 1,89E-01 |
| <i>THC2312367</i>      | -1,09 | 4,20E-02 | 1,89E-01 |
| <i>CRBN</i>            | 1,09  | 4,20E-02 | 1,89E-01 |
| <i>AK021933</i>        | 1,07  | 4,20E-02 | 1,89E-01 |
| <i>GOT1L1</i>          | -1,09 | 4,20E-02 | 1,89E-01 |
| <i>DHDH</i>            | -1,10 | 4,20E-02 | 1,89E-01 |
| <i>ZFP95</i>           | -1,07 | 4,20E-02 | 1,89E-01 |
| <i>A_24_P195749</i>    | 1,09  | 4,21E-02 | 1,89E-01 |
| <i>OR1F1</i>           | 1,09  | 4,21E-02 | 1,89E-01 |
| <i>TANK</i>            | 1,10  | 4,20E-02 | 1,89E-01 |
| <i>RAP1GAP</i>         | 1,11  | 4,20E-02 | 1,89E-01 |
| <i>A_24_P409824</i>    | 1,18  | 4,21E-02 | 1,89E-01 |
| <i>YWHAH</i>           | 1,12  | 4,21E-02 | 1,90E-01 |
| <i>AK023338</i>        | 1,12  | 4,21E-02 | 1,90E-01 |
| <i>ZNF16</i>           | -1,08 | 4,21E-02 | 1,90E-01 |
| <i>M14755</i>          | 1,10  | 4,22E-02 | 1,90E-01 |
| <i>A_32_P71171</i>     | 1,10  | 4,22E-02 | 1,90E-01 |
| <i>AA719641</i>        | 1,27  | 4,22E-02 | 1,90E-01 |
| <i>A_24_P109962</i>    | 1,11  | 4,22E-02 | 1,90E-01 |
| <i>TAOK1</i>           | 1,11  | 4,23E-02 | 1,90E-01 |
| <i>FDXR</i>            | -1,11 | 4,23E-02 | 1,90E-01 |

|                        |       |          |          |
|------------------------|-------|----------|----------|
| <i>ENST00000341782</i> | 1,09  | 4,23E-02 | 1,90E-01 |
| <i>VPS8</i>            | 1,11  | 4,23E-02 | 1,90E-01 |
| <i>GRIN1</i>           | 1,13  | 4,23E-02 | 1,90E-01 |
| <i>FAM55B</i>          | -1,10 | 4,23E-02 | 1,90E-01 |
| <i>GRLF1</i>           | 1,09  | 4,23E-02 | 1,90E-01 |
| <i>ENST00000354185</i> | 1,16  | 4,23E-02 | 1,90E-01 |
| <i>APOBEC3F</i>        | -1,10 | 4,23E-02 | 1,90E-01 |
| <i>SIX2</i>            | 1,43  | 4,23E-02 | 1,90E-01 |
| <i>A_32_P74901</i>     | -1,19 | 4,24E-02 | 1,90E-01 |
| <i>UTP18</i>           | -1,13 | 4,24E-02 | 1,90E-01 |
| <i>LOC442247</i>       | -1,08 | 4,24E-02 | 1,90E-01 |
| <i>KIAA0125</i>        | -1,21 | 4,24E-02 | 1,90E-01 |
| <i>AF050199</i>        | 1,07  | 4,24E-02 | 1,91E-01 |
| <i>LY6G5C</i>          | 1,15  | 4,24E-02 | 1,91E-01 |
| <i>AK022030</i>        | -1,09 | 4,25E-02 | 1,91E-01 |
| <i>INDO</i>            | -1,22 | 4,25E-02 | 1,91E-01 |
| <i>MTIF3</i>           | -1,06 | 4,25E-02 | 1,91E-01 |
| <i>ENST00000379440</i> | 1,08  | 4,25E-02 | 1,91E-01 |
| <i>FLJ30428</i>        | -1,09 | 4,25E-02 | 1,91E-01 |
| <i>A_24_P316059</i>    | 1,15  | 4,25E-02 | 1,91E-01 |
| <i>ENST00000368088</i> | -1,08 | 4,26E-02 | 1,91E-01 |
| <i>OBFC1</i>           | 1,10  | 4,26E-02 | 1,91E-01 |
| <i>ENST00000295907</i> | -1,12 | 4,26E-02 | 1,91E-01 |
| <i>LOC256273</i>       | -1,11 | 4,26E-02 | 1,91E-01 |
| <i>ENST00000376834</i> | -1,10 | 4,26E-02 | 1,91E-01 |
| <i>PLOD2</i>           | 1,24  | 4,26E-02 | 1,91E-01 |
| <i>A_24_P384196</i>    | 1,11  | 4,26E-02 | 1,91E-01 |
| <i>THC2410088</i>      | -1,10 | 4,27E-02 | 1,91E-01 |
| <i>NDRG1</i>           | 1,17  | 4,27E-02 | 1,91E-01 |
| <i>THC2241022</i>      | -1,12 | 4,27E-02 | 1,91E-01 |
| <i>THC2445630</i>      | -1,11 | 4,27E-02 | 1,91E-01 |
| <i>THC2286661</i>      | -1,08 | 4,27E-02 | 1,91E-01 |
| <i>BAP1</i>            | 1,09  | 4,27E-02 | 1,91E-01 |
| <i>LY6G5B</i>          | 1,09  | 4,27E-02 | 1,91E-01 |
| <i>STMN1</i>           | -1,12 | 4,27E-02 | 1,91E-01 |
| <i>AK021800</i>        | -1,11 | 4,27E-02 | 1,91E-01 |
| <i>C7orf26</i>         | -1,06 | 4,27E-02 | 1,91E-01 |
| <i>GIPR</i>            | 1,14  | 4,28E-02 | 1,91E-01 |
| <i>LOC148203</i>       | -1,13 | 4,28E-02 | 1,91E-01 |
| <i>A_24_P548264</i>    | -1,10 | 4,28E-02 | 1,91E-01 |
| <i>CD8A</i>            | -1,34 | 4,28E-02 | 1,92E-01 |
| <i>SCGB3A1</i>         | -1,10 | 4,28E-02 | 1,92E-01 |
| <i>ITPKA</i>           | -1,16 | 4,29E-02 | 1,92E-01 |
| <i>PRKDC</i>           | -1,11 | 4,29E-02 | 1,92E-01 |

|                        |       |          |          |
|------------------------|-------|----------|----------|
| <i>FLJ25770</i>        | 1,07  | 4,29E-02 | 1,92E-01 |
| <i>COBLL1</i>          | 1,11  | 4,29E-02 | 1,92E-01 |
| <i>NDUFA4L2</i>        | 1,21  | 4,29E-02 | 1,92E-01 |
| <i>TIMM50</i>          | 1,08  | 4,29E-02 | 1,92E-01 |
| <i>ENST00000359933</i> | 1,07  | 4,30E-02 | 1,92E-01 |
| <i>KIAA1946</i>        | -1,13 | 4,30E-02 | 1,92E-01 |
| <i>A_24_P780319</i>    | 1,24  | 4,30E-02 | 1,92E-01 |
| <i>GUCA1A</i>          | -1,11 | 4,30E-02 | 1,92E-01 |
| <i>A_24_P934704</i>    | 1,14  | 4,30E-02 | 1,92E-01 |
| <i>C6</i>              | -1,30 | 4,30E-02 | 1,92E-01 |
| <i>AF087980</i>        | -1,13 | 4,30E-02 | 1,92E-01 |
| <i>AY429544</i>        | 1,07  | 4,31E-02 | 1,92E-01 |
| <i>A_24_P195164</i>    | 1,23  | 4,31E-02 | 1,92E-01 |
| <i>AK095780</i>        | -1,11 | 4,31E-02 | 1,92E-01 |
| <i>ENST00000378119</i> | -1,09 | 4,31E-02 | 1,92E-01 |
| <i>KIAA0831</i>        | -1,10 | 4,31E-02 | 1,92E-01 |
| <i>THUMPD1</i>         | -1,09 | 4,32E-02 | 1,92E-01 |
| <i>W04231</i>          | 1,09  | 4,31E-02 | 1,92E-01 |
| <i>FLJ43374</i>        | 1,09  | 4,32E-02 | 1,92E-01 |
| <i>C6orf150</i>        | 1,17  | 4,31E-02 | 1,92E-01 |
| <i>BG108194</i>        | 1,17  | 4,32E-02 | 1,92E-01 |
| <i>A_24_P499282</i>    | 1,07  | 4,32E-02 | 1,92E-01 |
| <i>GRPEL1</i>          | 1,09  | 4,32E-02 | 1,92E-01 |
| <i>MAN1A1</i>          | 1,18  | 4,32E-02 | 1,92E-01 |
| <i>A_24_P928228</i>    | 1,10  | 4,32E-02 | 1,93E-01 |
| <i>THC2296760</i>      | -1,14 | 4,33E-02 | 1,93E-01 |
| <i>AK000861</i>        | -1,09 | 4,33E-02 | 1,93E-01 |
| <i>THC2318888</i>      | -1,08 | 4,33E-02 | 1,93E-01 |
| <i>RAD21</i>           | -1,08 | 4,33E-02 | 1,93E-01 |
| <i>THC2342714</i>      | 1,10  | 4,33E-02 | 1,93E-01 |
| <i>PDLIM4</i>          | 1,19  | 4,33E-02 | 1,93E-01 |
| <i>TCEAL8</i>          | -1,10 | 4,33E-02 | 1,93E-01 |
| <i>THC2443336</i>      | 1,06  | 4,33E-02 | 1,93E-01 |
| <i>A_24_P341126</i>    | -1,63 | 4,33E-02 | 1,93E-01 |
| <i>DRB1</i>            | -1,07 | 4,33E-02 | 1,93E-01 |
| <i>THBS3</i>           | 1,15  | 4,33E-02 | 1,93E-01 |
| <i>SP5</i>             | -1,19 | 4,33E-02 | 1,93E-01 |
| <i>AMD1</i>            | 1,10  | 4,33E-02 | 1,93E-01 |
| <i>OCIAD1</i>          | -1,10 | 4,34E-02 | 1,93E-01 |
| <i>GLT8D2</i>          | -1,08 | 4,34E-02 | 1,93E-01 |
| <i>C2orf13</i>         | 1,06  | 4,34E-02 | 1,93E-01 |
| <i>FAM47B</i>          | 1,07  | 4,34E-02 | 1,93E-01 |
| <i>SNAPC4</i>          | -1,07 | 4,34E-02 | 1,93E-01 |
| <i>LOC168850</i>       | 1,08  | 4,34E-02 | 1,93E-01 |



|                        |       |          |          |
|------------------------|-------|----------|----------|
| <i>RPL13</i>           | -1,08 | 4,35E-02 | 1,93E-01 |
| <i>A_24_P913198</i>    | 1,08  | 4,35E-02 | 1,93E-01 |
| <i>AF130116</i>        | 1,07  | 4,35E-02 | 1,93E-01 |
| <i>THC2375394</i>      | 1,20  | 4,35E-02 | 1,93E-01 |
| <i>AK094748</i>        | -1,14 | 4,35E-02 | 1,93E-01 |
| <i>LIMS3</i>           | 1,25  | 4,35E-02 | 1,93E-01 |
| <i>SMARCA5</i>         | 1,09  | 4,36E-02 | 1,93E-01 |
| <i>L04336</i>          | -1,26 | 4,36E-02 | 1,93E-01 |
| <i>THC2360305</i>      | -1,12 | 4,36E-02 | 1,93E-01 |
| <i>ITLN1</i>           | -1,79 | 4,36E-02 | 1,93E-01 |
| <i>ZNF709</i>          | -1,10 | 4,36E-02 | 1,93E-01 |
| <i>CDC27</i>           | 1,08  | 4,36E-02 | 1,93E-01 |
| <i>FASTKD5</i>         | 1,10  | 4,36E-02 | 1,93E-01 |
| <i>AF116708</i>        | 1,09  | 4,37E-02 | 1,94E-01 |
| <i>A_24_P913178</i>    | 1,05  | 4,37E-02 | 1,94E-01 |
| <i>THC2283106</i>      | -1,18 | 4,37E-02 | 1,94E-01 |
| <i>INSIG2</i>          | 1,08  | 4,37E-02 | 1,94E-01 |
| <i>TYRO3</i>           | -1,24 | 4,37E-02 | 1,94E-01 |
| <i>DKC1</i>            | -1,09 | 4,37E-02 | 1,94E-01 |
| <i>ATP6V0D2</i>        | 1,07  | 4,37E-02 | 1,94E-01 |
| <i>A_32_P49552</i>     | 1,16  | 4,37E-02 | 1,94E-01 |
| <i>GPC4</i>            | -1,25 | 4,38E-02 | 1,94E-01 |
| <i>AA004908</i>        | 1,13  | 4,38E-02 | 1,94E-01 |
| <i>GSG1L</i>           | 1,07  | 4,38E-02 | 1,94E-01 |
| <i>CALCB</i>           | 1,15  | 4,38E-02 | 1,94E-01 |
| <i>ARX</i>             | 1,06  | 4,38E-02 | 1,94E-01 |
| <i>AK127078</i>        | -1,14 | 4,39E-02 | 1,94E-01 |
| <i>TREX1</i>           | 1,10  | 4,39E-02 | 1,94E-01 |
| <i>GAPDHS</i>          | -1,07 | 4,39E-02 | 1,94E-01 |
| <i>ENST00000358583</i> | -1,11 | 4,39E-02 | 1,94E-01 |
| <i>FLJ30655</i>        | 1,09  | 4,39E-02 | 1,94E-01 |
| <i>PATE</i>            | 1,08  | 4,39E-02 | 1,94E-01 |
| <i>GPR37</i>           | 1,15  | 4,39E-02 | 1,94E-01 |
| <i>AX721128</i>        | -1,08 | 4,40E-02 | 1,94E-01 |
| <i>GALNT4</i>          | 1,07  | 4,40E-02 | 1,94E-01 |
| <i>CB995946</i>        | -1,17 | 4,40E-02 | 1,94E-01 |
| <i>ACAD11</i>          | -1,08 | 4,40E-02 | 1,94E-01 |
| <i>THC2401471</i>      | -1,06 | 4,40E-02 | 1,94E-01 |
| <i>KIAA0247</i>        | 1,09  | 4,40E-02 | 1,94E-01 |
| <i>ENST00000255896</i> | -1,17 | 4,40E-02 | 1,94E-01 |
| <i>KLHL6</i>           | -1,14 | 4,40E-02 | 1,94E-01 |
| <i>KIAA1571</i>        | -1,14 | 4,41E-02 | 1,95E-01 |
| <i>AQP5</i>            | -1,11 | 4,41E-02 | 1,95E-01 |
| <i>AI754733</i>        | 1,12  | 4,41E-02 | 1,95E-01 |

|                        |       |          |          |
|------------------------|-------|----------|----------|
| <i>CG012</i>           | -1,12 | 4,41E-02 | 1,95E-01 |
| <i>ITPR2</i>           | -1,09 | 4,41E-02 | 1,95E-01 |
| <i>AK092522</i>        | -1,17 | 4,41E-02 | 1,95E-01 |
| <i>SPTBN2</i>          | 1,08  | 4,41E-02 | 1,95E-01 |
| <i>RLF</i>             | 1,09  | 4,42E-02 | 1,95E-01 |
| <i>BG952851</i>        | 1,15  | 4,42E-02 | 1,95E-01 |
| <i>THC2315330</i>      | -1,11 | 4,42E-02 | 1,95E-01 |
| <i>C1QTNF6</i>         | -1,33 | 4,42E-02 | 1,95E-01 |
| <i>F13170</i>          | 1,08  | 4,43E-02 | 1,95E-01 |
| <i>THC2290220</i>      | -1,23 | 4,43E-02 | 1,95E-01 |
| <i>SUCNR1</i>          | 1,12  | 4,43E-02 | 1,95E-01 |
| <i>KIAA1731</i>        | -1,10 | 4,43E-02 | 1,95E-01 |
| <i>ZNF341</i>          | 1,11  | 4,43E-02 | 1,95E-01 |
| <i>EHD4</i>            | 1,11  | 4,44E-02 | 1,95E-01 |
| <i>A_24_P289504</i>    | 1,16  | 4,44E-02 | 1,95E-01 |
| <i>THC2442822</i>      | 1,31  | 4,44E-02 | 1,95E-01 |
| <i>A_24_P608790</i>    | 1,06  | 4,44E-02 | 1,96E-01 |
| <i>THC2286822</i>      | -1,08 | 4,44E-02 | 1,96E-01 |
| <i>A_24_P932468</i>    | -1,05 | 4,44E-02 | 1,96E-01 |
| <i>A_24_P41890</i>     | 1,12  | 4,45E-02 | 1,96E-01 |
| <i>PRPH</i>            | 1,25  | 4,45E-02 | 1,96E-01 |
| <i>A_32_P77421</i>     | -1,08 | 4,45E-02 | 1,96E-01 |
| <i>BF802139</i>        | 1,09  | 4,45E-02 | 1,96E-01 |
| <i>DPEP3</i>           | 1,13  | 4,45E-02 | 1,96E-01 |
| <i>BC035666</i>        | -1,13 | 4,45E-02 | 1,96E-01 |
| <i>KAL1</i>            | 1,31  | 4,45E-02 | 1,96E-01 |
| <i>NDUFV1</i>          | 1,06  | 4,46E-02 | 1,96E-01 |
| <i>THC2444734</i>      | -1,12 | 4,46E-02 | 1,96E-01 |
| <i>LOC147645</i>       | -1,21 | 4,46E-02 | 1,96E-01 |
| <i>THC2301157</i>      | -1,11 | 4,47E-02 | 1,96E-01 |
| <i>ENST00000291567</i> | 1,07  | 4,47E-02 | 1,96E-01 |
| <i>SH3GLB1</i>         | 1,09  | 4,47E-02 | 1,96E-01 |
| <i>ENST00000305749</i> | -1,18 | 4,47E-02 | 1,97E-01 |
| <i>CPAMD8</i>          | -1,28 | 4,48E-02 | 1,97E-01 |
| <i>A_24_P918131</i>    | 1,08  | 4,48E-02 | 1,97E-01 |
| <i>BG571083</i>        | -1,11 | 4,48E-02 | 1,97E-01 |
| <i>GNPDA2</i>          | -1,09 | 4,48E-02 | 1,97E-01 |
| <i>A_32_P182246</i>    | 1,11  | 4,48E-02 | 1,97E-01 |
| <i>A_24_P925327</i>    | 1,07  | 4,49E-02 | 1,97E-01 |
| <i>LOC644937</i>       | -1,06 | 4,49E-02 | 1,97E-01 |
| <i>SPCS1</i>           | -1,07 | 4,50E-02 | 1,97E-01 |
| <i>LILRB5</i>          | -1,18 | 4,50E-02 | 1,97E-01 |
| <i>LOC653509</i>       | 1,07  | 4,51E-02 | 1,98E-01 |
| <i>A_32_P169353</i>    | 1,14  | 4,50E-02 | 1,98E-01 |

|                        |       |          |          |
|------------------------|-------|----------|----------|
| <i>SPOP</i>            | 1,16  | 4,51E-02 | 1,98E-01 |
| <i>AK056744</i>        | -1,11 | 4,51E-02 | 1,98E-01 |
| <i>HIST1H2BJ</i>       | 1,08  | 4,51E-02 | 1,98E-01 |
| <i>CACNA2D2</i>        | -1,09 | 4,51E-02 | 1,98E-01 |
| <i>IGKV1-5</i>         | -2,00 | 4,51E-02 | 1,98E-01 |
| <i>AK128396</i>        | -1,11 | 4,51E-02 | 1,98E-01 |
| <i>THC2386962</i>      | -1,09 | 4,51E-02 | 1,98E-01 |
| <i>CPXM</i>            | -1,29 | 4,52E-02 | 1,98E-01 |
| <i>CR596491</i>        | -1,16 | 4,52E-02 | 1,98E-01 |
| <i>THC2280750</i>      | -1,15 | 4,52E-02 | 1,98E-01 |
| <i>AK001846</i>        | -1,14 | 4,52E-02 | 1,98E-01 |
| <i>FLJ31033</i>        | -1,10 | 4,52E-02 | 1,98E-01 |
| <i>LAYN</i>            | 1,15  | 4,52E-02 | 1,98E-01 |
| <i>FLJ25076</i>        | 1,20  | 4,52E-02 | 1,98E-01 |
| <i>SLC2A12</i>         | 1,35  | 4,52E-02 | 1,98E-01 |
| <i>ENST00000325151</i> | 1,10  | 4,52E-02 | 1,98E-01 |
| <i>A_24_P605798</i>    | -1,11 | 4,53E-02 | 1,98E-01 |
| <i>STK24</i>           | 1,07  | 4,53E-02 | 1,98E-01 |
| <i>EP400NL</i>         | 1,12  | 4,53E-02 | 1,98E-01 |
| <i>PUSL1</i>           | -1,10 | 4,53E-02 | 1,98E-01 |
| <i>C1orf112</i>        | -1,07 | 4,53E-02 | 1,98E-01 |
| <i>A_24_P41939</i>     | 1,08  | 4,53E-02 | 1,98E-01 |
| <i>COLEC11</i>         | 1,21  | 4,53E-02 | 1,98E-01 |
| <i>QARS</i>            | 1,09  | 4,53E-02 | 1,98E-01 |
| <i>THC2267038</i>      | -1,08 | 4,54E-02 | 1,98E-01 |
| <i>AB030181</i>        | 1,07  | 4,54E-02 | 1,98E-01 |
| <i>C22orf28</i>        | -1,05 | 4,54E-02 | 1,98E-01 |
| <i>FLJ21908</i>        | -1,09 | 4,54E-02 | 1,98E-01 |
| <i>DDEF1IT1</i>        | 1,11  | 4,54E-02 | 1,98E-01 |
| <i>A_24_P391748</i>    | 1,07  | 4,54E-02 | 1,98E-01 |
| <i>A_24_P792748</i>    | 1,08  | 4,54E-02 | 1,98E-01 |
| <i>ENST00000369731</i> | 1,23  | 4,54E-02 | 1,98E-01 |
| <i>DKFZP564C152</i>    | -1,10 | 4,55E-02 | 1,99E-01 |
| <i>CPSF4</i>           | -1,06 | 4,55E-02 | 1,99E-01 |
| <i>TAF5</i>            | -1,07 | 4,55E-02 | 1,99E-01 |
| <i>FAM33A</i>          | 1,07  | 4,55E-02 | 1,99E-01 |
| <i>FLJ14346</i>        | -1,10 | 4,55E-02 | 1,99E-01 |
| <i>THC2290449</i>      | 1,15  | 4,55E-02 | 1,99E-01 |
| <i>LOC651831</i>       | 1,08  | 4,56E-02 | 1,99E-01 |
| <i>AU184995</i>        | -1,15 | 4,56E-02 | 1,99E-01 |
| <i>AA279208</i>        | -1,09 | 4,56E-02 | 1,99E-01 |
| <i>TRAPPC4</i>         | -1,08 | 4,56E-02 | 1,99E-01 |
| <i>TMEM95</i>          | 1,17  | 4,56E-02 | 1,99E-01 |
| <i>PECAM1</i>          | 1,19  | 4,56E-02 | 1,99E-01 |

|                        |       |          |          |
|------------------------|-------|----------|----------|
| <i>THC2415323</i>      | 1,27  | 4,56E-02 | 1,99E-01 |
| <i>THC2386589</i>      | 1,14  | 4,56E-02 | 1,99E-01 |
| <i>THC2239580</i>      | -1,09 | 4,56E-02 | 1,99E-01 |
| <i>ARL16</i>           | -1,06 | 4,56E-02 | 1,99E-01 |
| <i>FLJ32894</i>        | 1,09  | 4,57E-02 | 1,99E-01 |
| <i>AF131798</i>        | 1,14  | 4,57E-02 | 1,99E-01 |
| <i>THC2305888</i>      | 1,17  | 4,56E-02 | 1,99E-01 |
| <i>SMYD4</i>           | -1,10 | 4,57E-02 | 1,99E-01 |
| <i>DNMT1</i>           | -1,07 | 4,57E-02 | 1,99E-01 |
| <i>SPAG7</i>           | 1,06  | 4,57E-02 | 1,99E-01 |
| <i>PABPC4</i>          | 1,08  | 4,57E-02 | 1,99E-01 |
| <i>THC2333563</i>      | 1,08  | 4,58E-02 | 1,99E-01 |
| <i>SLC6A10P</i>        | 1,22  | 4,58E-02 | 1,99E-01 |
| <i>DUSP11</i>          | -1,08 | 4,58E-02 | 1,99E-01 |
| <i>THC2367766</i>      | 1,07  | 4,58E-02 | 1,99E-01 |
| <i>THC2250926</i>      | 1,07  | 4,59E-02 | 1,99E-01 |
| <i>ENST00000329610</i> | -1,18 | 4,59E-02 | 2,00E-01 |
| <i>PIN1L</i>           | 1,06  | 4,60E-02 | 2,00E-01 |
| <i>IFT74</i>           | -1,08 | 4,60E-02 | 2,00E-01 |
| <i>AL555100</i>        | 1,08  | 4,60E-02 | 2,00E-01 |
| <i>ACTN3</i>           | 1,22  | 4,60E-02 | 2,00E-01 |
| <i>ZNF43</i>           | -1,16 | 4,60E-02 | 2,00E-01 |
| <i>A_24_P332953</i>    | 1,09  | 4,60E-02 | 2,00E-01 |
| <i>AF035034</i>        | -2,03 | 4,60E-02 | 2,00E-01 |
| <i>A_24_P814872</i>    | -1,16 | 4,60E-02 | 2,00E-01 |
| <i>WBP2</i>            | 1,08  | 4,60E-02 | 2,00E-01 |
| <i>BC009749</i>        | 1,07  | 4,61E-02 | 2,00E-01 |
| <i>A_24_P178333</i>    | 1,07  | 4,61E-02 | 2,00E-01 |
| <i>THC2316840</i>      | -1,08 | 4,61E-02 | 2,00E-01 |
| <i>ZNF566</i>          | -1,10 | 4,62E-02 | 2,00E-01 |
| <i>PPP1R16A</i>        | -1,09 | 4,62E-02 | 2,00E-01 |
| <i>GGN</i>             | 1,08  | 4,62E-02 | 2,00E-01 |
| <i>BIRC3</i>           | 1,22  | 4,62E-02 | 2,00E-01 |
| <i>C9orf75</i>         | -1,08 | 4,62E-02 | 2,01E-01 |
| <i>THC2310680</i>      | 1,08  | 4,62E-02 | 2,01E-01 |
| <i>A_23_P136857</i>    | 1,09  | 4,62E-02 | 2,01E-01 |
| <i>AA348270</i>        | 1,15  | 4,63E-02 | 2,01E-01 |
| <i>USP35</i>           | -1,12 | 4,63E-02 | 2,01E-01 |
| <i>THC2445517</i>      | 1,24  | 4,63E-02 | 2,01E-01 |
| <i>CEACAM7</i>         | -1,23 | 4,64E-02 | 2,01E-01 |
| <i>LYPD1</i>           | 1,20  | 4,64E-02 | 2,01E-01 |
| <i>EPHA7</i>           | 1,11  | 4,64E-02 | 2,01E-01 |
| <i>C6orf26</i>         | -1,16 | 4,64E-02 | 2,01E-01 |
| <i>FKBP9L</i>          | 1,12  | 4,64E-02 | 2,01E-01 |

|                        |       |          |          |
|------------------------|-------|----------|----------|
| <i>BC041389</i>        | -1,12 | 4,65E-02 | 2,01E-01 |
| <i>DBNDD2</i>          | 1,16  | 4,65E-02 | 2,01E-01 |
| <i>ST8SIA2</i>         | 1,07  | 4,65E-02 | 2,01E-01 |
| <i>THC2321023</i>      | -1,50 | 4,65E-02 | 2,01E-01 |
| <i>C15orf5</i>         | -1,12 | 4,66E-02 | 2,02E-01 |
| <i>TOMM34</i>          | 1,10  | 4,66E-02 | 2,02E-01 |
| <i>LNPEP</i>           | 1,11  | 4,66E-02 | 2,02E-01 |
| <i>A_32_P125984</i>    | -1,21 | 4,67E-02 | 2,02E-01 |
| <i>A_23_P13535</i>     | -1,08 | 4,67E-02 | 2,02E-01 |
| <i>TATDN3</i>          | 1,07  | 4,67E-02 | 2,02E-01 |
| <i>N-PAC</i>           | 1,07  | 4,67E-02 | 2,02E-01 |
| <i>ACADM</i>           | 1,07  | 4,67E-02 | 2,02E-01 |
| <i>AB002438</i>        | -1,11 | 4,67E-02 | 2,02E-01 |
| <i>ENST00000380186</i> | -1,16 | 4,67E-02 | 2,02E-01 |
| <i>PDCD2L</i>          | -1,07 | 4,67E-02 | 2,02E-01 |
| <i>CRMP1</i>           | -1,24 | 4,68E-02 | 2,02E-01 |
| <i>GPR98</i>           | -1,09 | 4,68E-02 | 2,02E-01 |
| <i>ANKRD38</i>         | -1,18 | 4,68E-02 | 2,02E-01 |
| <i>FLJ35880</i>        | 1,10  | 4,68E-02 | 2,02E-01 |
| <i>CCDC99</i>          | -1,07 | 4,68E-02 | 2,02E-01 |
| <i>A_32_P170847</i>    | 1,07  | 4,69E-02 | 2,02E-01 |
| <i>LOC147804</i>       | 1,10  | 4,69E-02 | 2,03E-01 |
| <i>A_24_P792988</i>    | 1,18  | 4,69E-02 | 2,03E-01 |
| <i>HSPA9B</i>          | 1,08  | 4,69E-02 | 2,03E-01 |
| <i>ZFPM1</i>           | 1,06  | 4,70E-02 | 2,03E-01 |
| <i>APOD</i>            | -1,39 | 4,70E-02 | 2,03E-01 |
| <i>ENST00000343732</i> | -1,11 | 4,70E-02 | 2,03E-01 |
| <i>BAZ1B</i>           | -1,08 | 4,70E-02 | 2,03E-01 |
| <i>MIF</i>             | 1,09  | 4,71E-02 | 2,03E-01 |
| <i>KIAA1468</i>        | -1,09 | 4,71E-02 | 2,03E-01 |
| <i>AI337612</i>        | 1,08  | 4,71E-02 | 2,03E-01 |
| <i>EPSTI1</i>          | 1,10  | 4,71E-02 | 2,03E-01 |
| <i>THC2439319</i>      | -1,11 | 4,72E-02 | 2,03E-01 |
| <i>SAPS1</i>           | 1,29  | 4,72E-02 | 2,04E-01 |
| <i>A_24_P375599</i>    | -1,08 | 4,72E-02 | 2,04E-01 |
| <i>ZNF326</i>          | -1,09 | 4,72E-02 | 2,04E-01 |
| <i>ENST00000374536</i> | -1,07 | 4,73E-02 | 2,04E-01 |
| <i>AW167439</i>        | -1,07 | 4,73E-02 | 2,04E-01 |
| <i>FURIN</i>           | 1,07  | 4,73E-02 | 2,04E-01 |
| <i>ENST00000328945</i> | -1,11 | 4,73E-02 | 2,04E-01 |
| <i>KCNN1</i>           | -1,09 | 4,73E-02 | 2,04E-01 |
| <i>AI088710</i>        | 1,06  | 4,73E-02 | 2,04E-01 |
| <i>BX105253</i>        | 1,07  | 4,73E-02 | 2,04E-01 |
| <i>CHN2</i>            | 1,08  | 4,73E-02 | 2,04E-01 |

|                      |       |          |          |
|----------------------|-------|----------|----------|
| <i>C18orf8</i>       | 1,08  | 4,74E-02 | 2,04E-01 |
| <i>SMARCC1</i>       | 1,09  | 4,73E-02 | 2,04E-01 |
| <i>CCIN</i>          | 1,13  | 4,73E-02 | 2,04E-01 |
| <i>BMP6</i>          | 1,29  | 4,74E-02 | 2,04E-01 |
| <i>THC2340803</i>    | 1,67  | 4,73E-02 | 2,04E-01 |
| <i>BC018626</i>      | 1,15  | 4,74E-02 | 2,04E-01 |
| <i>THC2283645</i>    | -1,12 | 4,74E-02 | 2,04E-01 |
| <i>THC2404072</i>    | -1,11 | 4,74E-02 | 2,04E-01 |
| <i>DKFZP564O0823</i> | 1,16  | 4,74E-02 | 2,04E-01 |
| <i>BC014606</i>      | 1,06  | 4,74E-02 | 2,04E-01 |
| <i>FLJ10081</i>      | -1,10 | 4,75E-02 | 2,04E-01 |
| <i>BC060806</i>      | 1,11  | 4,75E-02 | 2,04E-01 |
| <i>AF264623</i>      | -1,17 | 4,75E-02 | 2,04E-01 |
| <i>SLBP</i>          | -1,10 | 4,75E-02 | 2,04E-01 |
| <i>KIAA1012</i>      | -1,10 | 4,75E-02 | 2,04E-01 |
| <i>NMT1</i>          | -1,06 | 4,75E-02 | 2,04E-01 |
| <i>BX093077</i>      | 1,12  | 4,75E-02 | 2,04E-01 |
| <i>PIPOX</i>         | 1,08  | 4,75E-02 | 2,04E-01 |
| <i>P2RY6</i>         | -1,15 | 4,76E-02 | 2,04E-01 |
| <i>ERGIC1</i>        | 1,09  | 4,76E-02 | 2,04E-01 |
| <i>AK128436</i>      | -1,11 | 4,76E-02 | 2,05E-01 |
| <i>STK39</i>         | 1,11  | 4,76E-02 | 2,05E-01 |
| <i>LATS1</i>         | 1,12  | 4,76E-02 | 2,05E-01 |
| <i>ACCN4</i>         | -1,14 | 4,77E-02 | 2,05E-01 |
| <i>SAMD14</i>        | 1,13  | 4,78E-02 | 2,05E-01 |
| <i>RPL15</i>         | -1,06 | 4,78E-02 | 2,05E-01 |
| <i>A_32_P197393</i>  | -1,33 | 4,78E-02 | 2,05E-01 |
| <i>THC2315472</i>    | -1,09 | 4,79E-02 | 2,05E-01 |
| <i>UBAP2L</i>        | 1,08  | 4,79E-02 | 2,05E-01 |
| <i>KIAA1957</i>      | -1,44 | 4,79E-02 | 2,05E-01 |
| <i>C17orf55</i>      | -1,10 | 4,79E-02 | 2,05E-01 |
| <i>RPL36A</i>        | -1,08 | 4,79E-02 | 2,05E-01 |
| <i>FLJ39824</i>      | 1,07  | 4,79E-02 | 2,05E-01 |
| <i>MAP3K10</i>       | 1,08  | 4,79E-02 | 2,05E-01 |
| <i>OR10J3</i>        | -1,07 | 4,79E-02 | 2,05E-01 |
| <i>AK098479</i>      | 1,17  | 4,80E-02 | 2,06E-01 |
| <i>PCDHGC5</i>       | 1,08  | 4,80E-02 | 2,06E-01 |
| <i>BE798911</i>      | 1,20  | 4,80E-02 | 2,06E-01 |
| <i>BC040991</i>      | -1,12 | 4,81E-02 | 2,06E-01 |
| <i>THC2340670</i>    | -1,11 | 4,81E-02 | 2,06E-01 |
| <i>IGSF22</i>        | 1,07  | 4,81E-02 | 2,06E-01 |
| <i>BG950086</i>      | 1,25  | 4,81E-02 | 2,06E-01 |
| <i>A_24_P315644</i>  | 1,09  | 4,81E-02 | 2,06E-01 |
| <i>ANKS6</i>         | -1,09 | 4,82E-02 | 2,06E-01 |

|                        |       |          |          |
|------------------------|-------|----------|----------|
| <i>ENST00000349637</i> | 1,07  | 4,82E-02 | 2,06E-01 |
| <i>C16orf61</i>        | 1,10  | 4,82E-02 | 2,06E-01 |
| <i>MYL4</i>            | 1,10  | 4,82E-02 | 2,06E-01 |
| <i>DCTN6</i>           | 1,07  | 4,82E-02 | 2,06E-01 |
| <i>RIN1</i>            | 1,11  | 4,82E-02 | 2,06E-01 |
| <i>MYO1C</i>           | -1,10 | 4,82E-02 | 2,06E-01 |
| <i>THRAP1</i>          | 1,10  | 4,82E-02 | 2,06E-01 |
| <i>39508</i>           | 1,10  | 4,82E-02 | 2,06E-01 |
| <i>LOC649791</i>       | -1,08 | 4,83E-02 | 2,06E-01 |
| <i>RAPGEF1</i>         | 1,08  | 4,83E-02 | 2,06E-01 |
| <i>SLC25A32</i>        | 1,09  | 4,83E-02 | 2,06E-01 |
| <i>ADCY2</i>           | 1,21  | 4,83E-02 | 2,06E-01 |
| <i>ZCCHC3</i>          | -1,09 | 4,84E-02 | 2,07E-01 |
| <i>AK124263</i>        | -1,12 | 4,84E-02 | 2,07E-01 |
| <i>BC035247</i>        | -1,11 | 4,84E-02 | 2,07E-01 |
| <i>DCK</i>             | -1,10 | 4,84E-02 | 2,07E-01 |
| <i>JMJD2D</i>          | -1,10 | 4,84E-02 | 2,07E-01 |
| <i>THC2459818</i>      | -1,10 | 4,84E-02 | 2,07E-01 |
| <i>GGTLA4</i>          | -1,08 | 4,84E-02 | 2,07E-01 |
| <i>BC073918</i>        | -1,06 | 4,84E-02 | 2,07E-01 |
| <i>A_24_P749042</i>    | 1,21  | 4,84E-02 | 2,07E-01 |
| <i>CDC42BPA</i>        | 1,09  | 4,85E-02 | 2,07E-01 |
| <i>A_24_P200962</i>    | -1,08 | 4,86E-02 | 2,07E-01 |
| <i>ARFIP1</i>          | -1,08 | 4,86E-02 | 2,07E-01 |
| <i>THC2408803</i>      | -1,07 | 4,86E-02 | 2,07E-01 |
| <i>C9orf37</i>         | -1,07 | 4,85E-02 | 2,07E-01 |
| <i>IL5RA</i>           | 1,05  | 4,85E-02 | 2,07E-01 |
| <i>TRAPPC3</i>         | 1,07  | 4,85E-02 | 2,07E-01 |
| <i>ACAA2</i>           | 1,08  | 4,85E-02 | 2,07E-01 |
| <i>A_24_P101181</i>    | 1,10  | 4,85E-02 | 2,07E-01 |
| <i>A_24_P475115</i>    | 1,13  | 4,86E-02 | 2,07E-01 |
| <i>UCN2</i>            | 1,16  | 4,86E-02 | 2,07E-01 |
| <i>AF289615</i>        | 1,19  | 4,85E-02 | 2,07E-01 |
| <i>AA918648</i>        | 1,07  | 4,86E-02 | 2,07E-01 |
| <i>NPY2R</i>           | -1,12 | 4,86E-02 | 2,07E-01 |
| <i>AVPR1A</i>          | 1,28  | 4,87E-02 | 2,07E-01 |
| <i>BC047014</i>        | -1,10 | 4,87E-02 | 2,07E-01 |
| <i>RPS28</i>           | -1,08 | 4,87E-02 | 2,07E-01 |
| <i>M74720</i>          | 1,11  | 4,87E-02 | 2,07E-01 |
| <i>LOC441461</i>       | 1,12  | 4,87E-02 | 2,07E-01 |
| <i>PPP2R2C</i>         | -1,27 | 4,87E-02 | 2,07E-01 |
| <i>BM468849</i>        | -1,14 | 4,87E-02 | 2,07E-01 |
| <i>BX116163</i>        | -1,11 | 4,88E-02 | 2,07E-01 |
| <i>UBQLN2</i>          | -1,11 | 4,88E-02 | 2,07E-01 |

|                 |       |          |          |
|-----------------|-------|----------|----------|
| ZG16            | -1,09 | 4,88E-02 | 2,07E-01 |
| GNB1            | 1,05  | 4,88E-02 | 2,07E-01 |
| TMED5           | 1,07  | 4,88E-02 | 2,07E-01 |
| HIST1H2AK       | 1,09  | 4,88E-02 | 2,07E-01 |
| A_24_P101493    | 1,09  | 4,88E-02 | 2,07E-01 |
| TMEM39B         | -1,08 | 4,88E-02 | 2,07E-01 |
| THC2311437      | -1,07 | 4,88E-02 | 2,07E-01 |
| NUP85           | -1,06 | 4,88E-02 | 2,07E-01 |
| A_32_P135767    | -1,12 | 4,89E-02 | 2,08E-01 |
| BC015351        | 1,07  | 4,89E-02 | 2,08E-01 |
| A_32_P104809    | 1,08  | 4,88E-02 | 2,08E-01 |
| SEPW1           | 1,10  | 4,88E-02 | 2,08E-01 |
| AK096606        | 1,14  | 4,89E-02 | 2,08E-01 |
| FLJ12355        | -1,11 | 4,89E-02 | 2,08E-01 |
| THC2444374      | -1,07 | 4,89E-02 | 2,08E-01 |
| AUP1            | 1,06  | 4,89E-02 | 2,08E-01 |
| NP111687        | 1,15  | 4,89E-02 | 2,08E-01 |
| NOS3            | 1,13  | 4,89E-02 | 2,08E-01 |
| BU625522        | -1,11 | 4,90E-02 | 2,08E-01 |
| LOC641999       | -1,06 | 4,90E-02 | 2,08E-01 |
| CRB3            | 1,07  | 4,90E-02 | 2,08E-01 |
| BCL2L1          | 1,07  | 4,90E-02 | 2,08E-01 |
| S100A10         | 1,20  | 4,90E-02 | 2,08E-01 |
| LOC644241       | -1,11 | 4,90E-02 | 2,08E-01 |
| BF986198        | -1,06 | 4,90E-02 | 2,08E-01 |
| THC2378865      | -1,35 | 4,90E-02 | 2,08E-01 |
| IL11            | 1,12  | 4,91E-02 | 2,08E-01 |
| A_23_P83991     | -1,11 | 4,91E-02 | 2,08E-01 |
| ENST00000374334 | -1,11 | 4,91E-02 | 2,08E-01 |
| S79672          | -1,10 | 4,91E-02 | 2,08E-01 |
| THC2314886      | -1,09 | 4,91E-02 | 2,08E-01 |
| A_32_P231880    | 1,08  | 4,91E-02 | 2,08E-01 |
| ERG             | 1,12  | 4,91E-02 | 2,08E-01 |
| C20orf100       | 1,29  | 4,91E-02 | 2,08E-01 |
| CA943539        | -1,15 | 4,91E-02 | 2,08E-01 |
| LYPD5           | 1,23  | 4,91E-02 | 2,08E-01 |
| UNQ6488         | -1,23 | 4,91E-02 | 2,08E-01 |
| A_24_P799245    | -1,06 | 4,92E-02 | 2,08E-01 |
| CCDC42          | 1,08  | 4,92E-02 | 2,08E-01 |
| ENST00000375284 | -1,13 | 4,92E-02 | 2,08E-01 |
| A_24_P924452    | 1,08  | 4,92E-02 | 2,08E-01 |
| LOC391403       | 1,07  | 4,92E-02 | 2,08E-01 |
| AF085962        | 1,08  | 4,93E-02 | 2,08E-01 |
| SP1             | 1,10  | 4,93E-02 | 2,08E-01 |



|                        |       |          |          |
|------------------------|-------|----------|----------|
| <i>FLJ23867</i>        | 1,11  | 4,93E-02 | 2,08E-01 |
| <i>LPIN2</i>           | -1,06 | 4,93E-02 | 2,08E-01 |
| <i>CD6</i>             | -1,11 | 4,93E-02 | 2,08E-01 |
| <i>BQ017638</i>        | -1,45 | 4,94E-02 | 2,09E-01 |
| <i>PDSS1</i>           | -1,09 | 4,94E-02 | 2,09E-01 |
| <i>CR616551</i>        | 1,07  | 4,94E-02 | 2,09E-01 |
| <i>CLPTM1</i>          | 1,08  | 4,94E-02 | 2,09E-01 |
| <i>FAM32A</i>          | 1,07  | 4,94E-02 | 2,09E-01 |
| <i>ANP32E</i>          | 1,07  | 4,94E-02 | 2,09E-01 |
| <i>ZNF747</i>          | -1,06 | 4,95E-02 | 2,09E-01 |
| <i>GPR178</i>          | 1,14  | 4,95E-02 | 2,09E-01 |
| <i>PXMP2</i>           | -1,07 | 4,95E-02 | 2,09E-01 |
| <i>CA503034</i>        | 1,09  | 4,95E-02 | 2,09E-01 |
| <i>IL7</i>             | -1,16 | 4,96E-02 | 2,09E-01 |
| <i>CLCN6</i>           | -1,10 | 4,96E-02 | 2,09E-01 |
| <i>ANKRD32</i>         | -1,08 | 4,96E-02 | 2,09E-01 |
| <i>CCL25</i>           | -1,11 | 4,96E-02 | 2,09E-01 |
| <i>SH3BP5L</i>         | -1,10 | 4,96E-02 | 2,09E-01 |
| <i>ENST00000332902</i> | -1,07 | 4,96E-02 | 2,09E-01 |
| <i>THC2329174</i>      | 1,06  | 4,96E-02 | 2,09E-01 |
| <i>PPM1B</i>           | 1,11  | 4,96E-02 | 2,09E-01 |
| <i>IRF6</i>            | 1,15  | 4,96E-02 | 2,09E-01 |
| <i>RUFY2</i>           | -1,08 | 4,96E-02 | 2,09E-01 |
| <i>CACNA1I</i>         | 1,09  | 4,96E-02 | 2,09E-01 |
| <i>A_32_P156549</i>    | -1,08 | 4,97E-02 | 2,09E-01 |
| <i>ITGAV</i>           | -1,10 | 4,97E-02 | 2,09E-01 |
| <i>ENST00000324414</i> | -1,08 | 4,97E-02 | 2,09E-01 |
| <i>FLJ22555</i>        | -1,05 | 4,97E-02 | 2,09E-01 |
| <i>AA180985</i>        | 1,08  | 4,97E-02 | 2,09E-01 |
| <i>ENST00000311412</i> | -1,14 | 4,98E-02 | 2,10E-01 |
| <i>BGLAP</i>           | -1,10 | 4,98E-02 | 2,10E-01 |
| <i>A_24_P401160</i>    | -1,08 | 4,98E-02 | 2,10E-01 |
| <i>NAG8</i>            | -1,13 | 4,98E-02 | 2,10E-01 |
| <i>LOC113179</i>       | 1,07  | 4,98E-02 | 2,10E-01 |
| <i>AW971282</i>        | 1,07  | 4,98E-02 | 2,10E-01 |
| <i>STC1</i>            | 1,20  | 4,98E-02 | 2,10E-01 |
| <i>IMPDH2</i>          | -1,06 | 4,99E-02 | 2,10E-01 |
| <i>LOC400751</i>       | 1,26  | 4,99E-02 | 2,10E-01 |
| <i>THC2317484</i>      | 1,09  | 4,99E-02 | 2,10E-01 |
| <i>A_24_P894763</i>    | 1,09  | 4,99E-02 | 2,10E-01 |
| <i>ADAR</i>            | -1,06 | 5,00E-02 | 2,10E-01 |
| <i>THC2442024</i>      | 1,16  | 5,00E-02 | 2,10E-01 |
| <i>THC2314901</i>      | -1,08 | 5,00E-02 | 2,10E-01 |
| <i>DIAPH2</i>          | 1,11  | 5,00E-02 | 2,10E-01 |

|                 |       |          |          |
|-----------------|-------|----------|----------|
| SCN2B           | -1,11 | 5,00E-02 | 2,10E-01 |
| A_23_P122650    | 1,24  | 5,00E-02 | 2,10E-01 |
| GADD45G         | -1,30 | 5,01E-02 | 2,10E-01 |
| ENST00000369453 | -1,07 | 5,00E-02 | 2,10E-01 |
| ENST00000377003 | -1,09 | 5,01E-02 | 2,10E-01 |
| MYL7            | 1,06  | 5,01E-02 | 2,10E-01 |
| ENST00000382327 | 1,12  | 5,01E-02 | 2,10E-01 |
| ANGPTL4         | 1,51  | 5,01E-02 | 2,10E-01 |
| TXLNA           | 1,09  | 5,01E-02 | 2,10E-01 |
| BCO22362        | -1,52 | 5,01E-02 | 2,10E-01 |
| MPEG1           | -1,15 | 5,02E-02 | 2,11E-01 |
| CKS1B           | -1,07 | 5,02E-02 | 2,11E-01 |
| A_24_P502652    | 1,12  | 5,02E-02 | 2,11E-01 |
| ACAD9           | -1,07 | 5,02E-02 | 2,11E-01 |
| A_24_P676200    | 1,09  | 5,02E-02 | 2,11E-01 |
| 3.8-1           | -1,08 | 5,02E-02 | 2,11E-01 |
| CDK5R2          | 1,08  | 5,02E-02 | 2,11E-01 |
| THC2454860      | -1,13 | 5,03E-02 | 2,11E-01 |
| LRRC48          | -1,09 | 5,02E-02 | 2,11E-01 |
| ENST00000320831 | 1,12  | 5,03E-02 | 2,11E-01 |
| HLA-DPA1        | -1,16 | 5,03E-02 | 2,11E-01 |
| ABCB5           | -1,14 | 5,03E-02 | 2,11E-01 |
| AA527754        | 1,09  | 5,03E-02 | 2,11E-01 |
| CA423858        | 1,09  | 5,03E-02 | 2,11E-01 |
| LOC163131       | 1,07  | 5,04E-02 | 2,11E-01 |
| GDPD5           | -1,11 | 5,04E-02 | 2,11E-01 |
| ZNF312          | 1,07  | 5,04E-02 | 2,11E-01 |
| A_24_P717305    | -1,16 | 5,04E-02 | 2,11E-01 |
| THC2323968      | 1,08  | 5,04E-02 | 2,11E-01 |
| C14orf1         | -1,09 | 5,05E-02 | 2,11E-01 |
| CCR4            | 1,07  | 5,04E-02 | 2,11E-01 |
| A_32_P173955    | -1,19 | 5,05E-02 | 2,11E-01 |
| LENG8           | -1,11 | 5,05E-02 | 2,11E-01 |
| THC2306096      | -1,09 | 5,05E-02 | 2,11E-01 |
| CD200R1         | -1,08 | 5,05E-02 | 2,11E-01 |
| RASEF           | 1,15  | 5,05E-02 | 2,11E-01 |
| A_24_P921649    | -1,09 | 5,05E-02 | 2,11E-01 |
| C1orf89         | -1,08 | 5,05E-02 | 2,11E-01 |
| CHERP           | -1,09 | 5,05E-02 | 2,11E-01 |
| AI972407        | 1,08  | 5,06E-02 | 2,11E-01 |
| SMEK2           | -1,08 | 5,06E-02 | 2,12E-01 |
| AK093729        | -1,13 | 5,06E-02 | 2,12E-01 |
| DDX31           | -1,06 | 5,06E-02 | 2,12E-01 |
| AQP10           | 1,10  | 5,06E-02 | 2,12E-01 |

|                 |       |          |          |
|-----------------|-------|----------|----------|
| ARSK            | -1,14 | 5,07E-02 | 2,12E-01 |
| ENST00000340783 | -1,07 | 5,07E-02 | 2,12E-01 |
| TIMP3           | 1,10  | 5,07E-02 | 2,12E-01 |
| LOC285831       | 1,12  | 5,07E-02 | 2,12E-01 |
| RPL27A          | -1,06 | 5,07E-02 | 2,12E-01 |
| BC015962        | 1,15  | 5,07E-02 | 2,12E-01 |
| AF277175        | -1,06 | 5,07E-02 | 2,12E-01 |
| LOC390712       | -1,41 | 5,07E-02 | 2,12E-01 |
| C9orf109        | -1,09 | 5,08E-02 | 2,12E-01 |
| FTSJ2           | -1,08 | 5,08E-02 | 2,12E-01 |
| THC2337921      | 1,09  | 5,08E-02 | 2,12E-01 |
| CDC2L6          | 1,10  | 5,08E-02 | 2,12E-01 |
| TRIO            | 1,08  | 5,08E-02 | 2,12E-01 |
| A_24_P551530    | 1,09  | 5,08E-02 | 2,12E-01 |
| SAC3D1          | -1,12 | 5,08E-02 | 2,12E-01 |
| SLC6A18         | 1,09  | 5,08E-02 | 2,12E-01 |
| CD28            | -1,16 | 5,09E-02 | 2,12E-01 |
| LEP             | -1,07 | 5,09E-02 | 2,12E-01 |
| SENP7           | -1,11 | 5,09E-02 | 2,12E-01 |
| AW270846        | 1,07  | 5,10E-02 | 2,12E-01 |
| PLEKHC1         | 1,23  | 5,10E-02 | 2,12E-01 |
| SUV39H2         | -1,08 | 5,10E-02 | 2,12E-01 |
| ENO1            | 1,10  | 5,10E-02 | 2,12E-01 |
| FOXH1           | 1,08  | 5,10E-02 | 2,13E-01 |
| GGTL3           | -1,07 | 5,10E-02 | 2,13E-01 |
| CXXC4           | -1,16 | 5,10E-02 | 2,13E-01 |
| PDCD1           | -1,10 | 5,11E-02 | 2,13E-01 |
| ZNF273          | -1,09 | 5,10E-02 | 2,13E-01 |
| PTPN7           | -1,11 | 5,11E-02 | 2,13E-01 |
| TPTE            | -1,11 | 5,11E-02 | 2,13E-01 |
| CIITA           | -1,12 | 5,11E-02 | 2,13E-01 |
| THC2373876      | -1,14 | 5,11E-02 | 2,13E-01 |
| THC2344914      | -1,18 | 5,12E-02 | 2,13E-01 |
| THC2404834      | 1,07  | 5,12E-02 | 2,13E-01 |
| THC2281591      | 1,69  | 5,12E-02 | 2,13E-01 |
| GYG2            | -1,24 | 5,12E-02 | 2,13E-01 |
| MAD2L1          | -1,08 | 5,12E-02 | 2,13E-01 |
| TMEM145         | 1,08  | 5,12E-02 | 2,13E-01 |
| LOC643125       | -1,08 | 5,12E-02 | 2,13E-01 |
| TMEM156         | 1,10  | 5,12E-02 | 2,13E-01 |
| 38596           | 1,11  | 5,12E-02 | 2,13E-01 |
| NUDT12          | -1,10 | 5,13E-02 | 2,13E-01 |
| A_24_P384604    | -1,67 | 5,14E-02 | 2,13E-01 |
| CALB1           | -1,25 | 5,14E-02 | 2,13E-01 |

|                 |       |          |          |
|-----------------|-------|----------|----------|
| AKNA            | -1,12 | 5,14E-02 | 2,13E-01 |
| PUS7L           | -1,08 | 5,13E-02 | 2,13E-01 |
| PEF1            | 1,06  | 5,14E-02 | 2,13E-01 |
| CGRRF1          | 1,07  | 5,14E-02 | 2,13E-01 |
| SYT10           | 1,22  | 5,14E-02 | 2,13E-01 |
| A_23_P108534    | 1,06  | 5,14E-02 | 2,13E-01 |
| AF263545        | 1,14  | 5,14E-02 | 2,13E-01 |
| THC2311900      | -1,07 | 5,14E-02 | 2,13E-01 |
| AKAP4           | 1,08  | 5,14E-02 | 2,13E-01 |
| EDD1            | 1,13  | 5,15E-02 | 2,14E-01 |
| AF343666        | -1,30 | 5,16E-02 | 2,14E-01 |
| IGSF10          | -1,13 | 5,15E-02 | 2,14E-01 |
| ZDHHC23         | -1,10 | 5,15E-02 | 2,14E-01 |
| USP43           | -1,08 | 5,16E-02 | 2,14E-01 |
| EXOSC3          | -1,07 | 5,15E-02 | 2,14E-01 |
| FBXO27          | -1,07 | 5,15E-02 | 2,14E-01 |
| ABCF3           | -1,07 | 5,16E-02 | 2,14E-01 |
| HBLD2           | 1,05  | 5,15E-02 | 2,14E-01 |
| THC2444824      | 1,07  | 5,16E-02 | 2,14E-01 |
| IL17F           | 1,08  | 5,16E-02 | 2,14E-01 |
| LHX6            | 1,19  | 5,16E-02 | 2,14E-01 |
| THC2406050      | -1,06 | 5,16E-02 | 2,14E-01 |
| ENST00000358079 | -1,07 | 5,16E-02 | 2,14E-01 |
| LIN7A           | 1,10  | 5,16E-02 | 2,14E-01 |
| MGC40405        | 1,11  | 5,16E-02 | 2,14E-01 |
| HIST1H4J        | 1,12  | 5,17E-02 | 2,14E-01 |
| ENST00000342829 | -1,09 | 5,17E-02 | 2,14E-01 |
| A_24_P674118    | -1,08 | 5,18E-02 | 2,14E-01 |
| RPS27L          | 1,07  | 5,18E-02 | 2,14E-01 |
| ENST00000241813 | -1,11 | 5,18E-02 | 2,14E-01 |
| LRP10           | 1,08  | 5,19E-02 | 2,15E-01 |
| A_24_P943238    | -1,09 | 5,19E-02 | 2,15E-01 |
| FBXW11          | -1,08 | 5,19E-02 | 2,15E-01 |
| THC2379583      | 1,10  | 5,19E-02 | 2,15E-01 |
| UBASH3A         | -1,15 | 5,19E-02 | 2,15E-01 |
| LOC286016       | 1,08  | 5,19E-02 | 2,15E-01 |
| A_32_P205522    | 1,11  | 5,19E-02 | 2,15E-01 |
| CLDN23          | 1,28  | 5,19E-02 | 2,15E-01 |
| Z21967          | -1,07 | 5,20E-02 | 2,15E-01 |
| OSBPL5          | 1,09  | 5,20E-02 | 2,15E-01 |
| MYCNOS          | 1,10  | 5,20E-02 | 2,15E-01 |
| A_23_P84791     | -1,38 | 5,20E-02 | 2,15E-01 |
| ENST00000326382 | 1,09  | 5,20E-02 | 2,15E-01 |
| SLC35F2         | -1,12 | 5,20E-02 | 2,15E-01 |

|                        |       |          |          |
|------------------------|-------|----------|----------|
| <i>CD86</i>            | 1,63  | 5,21E-02 | 2,15E-01 |
| <i>FAIM2</i>           | -1,27 | 5,21E-02 | 2,15E-01 |
| <i>FKSG44</i>          | -1,07 | 5,21E-02 | 2,15E-01 |
| <i>ENST00000377186</i> | 1,10  | 5,21E-02 | 2,15E-01 |
| <i>RASL10B</i>         | -1,16 | 5,21E-02 | 2,15E-01 |
| <i>PTGDS</i>           | -1,52 | 5,22E-02 | 2,15E-01 |
| <i>FAM84A</i>          | -1,18 | 5,22E-02 | 2,15E-01 |
| <i>NPM1</i>            | -1,09 | 5,22E-02 | 2,15E-01 |
| <i>BM808621</i>        | 1,11  | 5,22E-02 | 2,15E-01 |
| <i>A_24_P692030</i>    | 1,12  | 5,22E-02 | 2,15E-01 |
| <i>ADAM15</i>          | 1,17  | 5,22E-02 | 2,15E-01 |
| <i>PTPN23</i>          | -1,06 | 5,22E-02 | 2,15E-01 |
| <i>RPL23AP13</i>       | -1,21 | 5,23E-02 | 2,15E-01 |
| <i>LOC643940</i>       | -1,09 | 5,23E-02 | 2,15E-01 |
| <i>AF034209</i>        | 1,08  | 5,23E-02 | 2,15E-01 |
| <i>ENST00000318301</i> | 1,09  | 5,23E-02 | 2,16E-01 |
| <i>THC2437881</i>      | -1,10 | 5,24E-02 | 2,16E-01 |
| <i>TTC26</i>           | -1,06 | 5,23E-02 | 2,16E-01 |
| <i>C1orf150</i>        | -1,08 | 5,24E-02 | 2,16E-01 |
| <i>C21orf81</i>        | -1,38 | 5,25E-02 | 2,16E-01 |
| <i>CYP4V2</i>          | -1,13 | 5,25E-02 | 2,16E-01 |
| <i>DENR</i>            | -1,08 | 5,24E-02 | 2,16E-01 |
| <i>AK096154</i>        | -1,08 | 5,25E-02 | 2,16E-01 |
| <i>THC2311217</i>      | -1,06 | 5,24E-02 | 2,16E-01 |
| <i>BC021073</i>        | 1,12  | 5,25E-02 | 2,16E-01 |
| <i>LBX1</i>            | 1,07  | 5,25E-02 | 2,16E-01 |
| <i>TMEM26</i>          | -1,13 | 5,25E-02 | 2,16E-01 |
| <i>TCP10L</i>          | -1,09 | 5,25E-02 | 2,16E-01 |
| <i>WDR13</i>           | 1,06  | 5,25E-02 | 2,16E-01 |
| <i>CNTN4</i>           | 1,18  | 5,25E-02 | 2,16E-01 |
| <i>THC2265989</i>      | -1,10 | 5,26E-02 | 2,16E-01 |
| <i>STK32C</i>          | 1,07  | 5,26E-02 | 2,16E-01 |
| <i>A_24_P644554</i>    | 1,08  | 5,26E-02 | 2,16E-01 |
| <i>AA768672</i>        | 1,07  | 5,26E-02 | 2,16E-01 |
| <i>KIAA1217</i>        | 1,11  | 5,26E-02 | 2,16E-01 |
| <i>NCOA4</i>           | 1,12  | 5,26E-02 | 2,16E-01 |
| <i>DHODH</i>           | -1,08 | 5,27E-02 | 2,16E-01 |
| <i>UTRN</i>            | 1,16  | 5,27E-02 | 2,16E-01 |
| <i>GDPD3</i>           | -1,13 | 5,27E-02 | 2,17E-01 |
| <i>C22orf5</i>         | 1,07  | 5,27E-02 | 2,17E-01 |
| <i>C1orf50</i>         | -1,05 | 5,28E-02 | 2,17E-01 |
| <i>BU852331</i>        | 1,06  | 5,29E-02 | 2,17E-01 |
| <i>TMEM142A</i>        | -1,14 | 5,29E-02 | 2,17E-01 |
| <i>CR601260</i>        | -1,11 | 5,29E-02 | 2,17E-01 |

|                        |       |          |          |
|------------------------|-------|----------|----------|
| <i>THC2429214</i>      | -1,09 | 5,29E-02 | 2,17E-01 |
| <i>SH3D19</i>          | 1,13  | 5,29E-02 | 2,17E-01 |
| <i>CLIC5</i>           | -1,40 | 5,30E-02 | 2,17E-01 |
| <i>AL833655</i>        | 1,14  | 5,30E-02 | 2,17E-01 |
| <i>CMA1</i>            | -1,36 | 5,30E-02 | 2,17E-01 |
| <i>ENST00000380064</i> | -1,19 | 5,30E-02 | 2,17E-01 |
| <i>TACC3</i>           | -1,07 | 5,30E-02 | 2,17E-01 |
| <i>PDGFA</i>           | 1,16  | 5,30E-02 | 2,17E-01 |
| <i>SOX21</i>           | 1,06  | 5,31E-02 | 2,18E-01 |
| <i>B3GALT2</i>         | 1,10  | 5,31E-02 | 2,18E-01 |
| <i>MGC10334</i>        | 1,13  | 5,31E-02 | 2,18E-01 |
| <i>BC035751</i>        | 1,11  | 5,31E-02 | 2,18E-01 |
| <i>SNCA</i>            | 1,27  | 5,32E-02 | 2,18E-01 |
| <i>DDC</i>             | -1,13 | 5,32E-02 | 2,18E-01 |
| <i>THC2282321</i>      | -1,10 | 5,32E-02 | 2,18E-01 |
| <i>RFXAP</i>           | -1,10 | 5,32E-02 | 2,18E-01 |
| <i>PDCD2</i>           | -1,06 | 5,32E-02 | 2,18E-01 |
| <i>OR10J5</i>          | 1,05  | 5,32E-02 | 2,18E-01 |
| <i>A_24_P195714</i>    | 1,07  | 5,32E-02 | 2,18E-01 |
| <i>C21orf119</i>       | 1,07  | 5,32E-02 | 2,18E-01 |
| <i>ANKRD6</i>          | 1,09  | 5,32E-02 | 2,18E-01 |
| <i>BC041955</i>        | -1,16 | 5,33E-02 | 2,18E-01 |
| <i>GCN1L1</i>          | -1,07 | 5,33E-02 | 2,18E-01 |
| <i>AF007191</i>        | 1,08  | 5,33E-02 | 2,18E-01 |
| <i>HMX1</i>            | 1,08  | 5,33E-02 | 2,18E-01 |
| <i>BG654772</i>        | 1,12  | 5,33E-02 | 2,18E-01 |
| <i>TBX20</i>           | 1,08  | 5,33E-02 | 2,18E-01 |
| <i>AA484677</i>        | -1,16 | 5,33E-02 | 2,18E-01 |
| <i>PLCB2</i>           | 1,08  | 5,33E-02 | 2,18E-01 |
| <i>SLC35E4</i>         | -1,15 | 5,34E-02 | 2,18E-01 |
| <i>N47124</i>          | 1,62  | 5,34E-02 | 2,18E-01 |
| <i>VPS24</i>           | 1,08  | 5,34E-02 | 2,18E-01 |
| <i>THC2408828</i>      | 1,15  | 5,34E-02 | 2,18E-01 |
| <i>SLC30A5</i>         | -1,08 | 5,34E-02 | 2,18E-01 |
| <i>HIST4H4</i>         | 1,09  | 5,34E-02 | 2,18E-01 |
| <i>PGF</i>             | -1,18 | 5,34E-02 | 2,18E-01 |
| <i>PPAPDC1B</i>        | -1,12 | 5,34E-02 | 2,18E-01 |
| <i>BC029255</i>        | 1,05  | 5,34E-02 | 2,18E-01 |
| <i>AT_nB_3</i>         | 1,05  | 5,35E-02 | 2,18E-01 |
| <i>SLC25A6</i>         | 1,10  | 5,35E-02 | 2,18E-01 |
| <i>A_24_P921036</i>    | 1,07  | 5,35E-02 | 2,18E-01 |
| <i>THC2377297</i>      | 1,09  | 5,35E-02 | 2,18E-01 |
| <i>MLYCD</i>           | -1,15 | 5,35E-02 | 2,19E-01 |
| <i>KIAA1787</i>        | -1,07 | 5,35E-02 | 2,19E-01 |

|                        |       |          |          |
|------------------------|-------|----------|----------|
| <i>DOPEY2</i>          | 1,08  | 5,35E-02 | 2,19E-01 |
| <i>EGFL6</i>           | 1,15  | 5,36E-02 | 2,19E-01 |
| <i>BCL2</i>            | -1,11 | 5,36E-02 | 2,19E-01 |
| <i>THC2414210</i>      | -1,08 | 5,36E-02 | 2,19E-01 |
| <i>KCNH1</i>           | 1,09  | 5,36E-02 | 2,19E-01 |
| <i>RAD51AP1</i>        | -1,10 | 5,37E-02 | 2,19E-01 |
| <i>PS1TP4</i>          | -1,11 | 5,37E-02 | 2,19E-01 |
| <i>MXRA8</i>           | -1,13 | 5,37E-02 | 2,19E-01 |
| <i>SNX4</i>            | -1,09 | 5,37E-02 | 2,19E-01 |
| <i>ARRB1</i>           | 1,08  | 5,37E-02 | 2,19E-01 |
| <i>SFTPB</i>           | 1,06  | 5,38E-02 | 2,19E-01 |
| <i>GABRD</i>           | 1,11  | 5,38E-02 | 2,19E-01 |
| <i>XPNPEP2</i>         | 1,29  | 5,38E-02 | 2,19E-01 |
| <i>IL2RG</i>           | -1,13 | 5,38E-02 | 2,19E-01 |
| <i>PGBD2</i>           | -1,08 | 5,38E-02 | 2,19E-01 |
| <i>THC2436415</i>      | -1,08 | 5,38E-02 | 2,19E-01 |
| <i>MGC70863</i>        | -1,07 | 5,38E-02 | 2,19E-01 |
| <i>PPP4R2</i>          | 1,08  | 5,38E-02 | 2,19E-01 |
| <i>ITSN2</i>           | 1,12  | 5,38E-02 | 2,19E-01 |
| <i>CLIC1</i>           | 1,08  | 5,39E-02 | 2,19E-01 |
| <i>THC2377128</i>      | 1,26  | 5,39E-02 | 2,19E-01 |
| <i>OR2C3</i>           | -1,07 | 5,39E-02 | 2,19E-01 |
| <i>LAIR2</i>           | -1,10 | 5,39E-02 | 2,19E-01 |
| <i>A_23_P251196</i>    | -1,10 | 5,39E-02 | 2,19E-01 |
| <i>TOMM70A</i>         | -1,09 | 5,39E-02 | 2,19E-01 |
| <i>GATA1</i>           | -1,09 | 5,40E-02 | 2,20E-01 |
| <i>hCAP-H2</i>         | 1,06  | 5,41E-02 | 2,20E-01 |
| <i>C1orf158</i>        | 1,10  | 5,41E-02 | 2,20E-01 |
| <i>CDC37</i>           | 1,07  | 5,41E-02 | 2,20E-01 |
| <i>AI085826</i>        | -1,29 | 5,41E-02 | 2,20E-01 |
| <i>AF131762</i>        | -1,24 | 5,41E-02 | 2,20E-01 |
| <i>BZRAP1</i>          | -1,15 | 5,41E-02 | 2,20E-01 |
| <i>C20orf32</i>        | 1,07  | 5,41E-02 | 2,20E-01 |
| <i>A_24_P730088</i>    | 1,07  | 5,41E-02 | 2,20E-01 |
| <i>HLX1</i>            | -1,14 | 5,42E-02 | 2,20E-01 |
| <i>AK024470</i>        | -1,11 | 5,42E-02 | 2,20E-01 |
| <i>TM9SF2</i>          | -1,07 | 5,42E-02 | 2,20E-01 |
| <i>KCNK4</i>           | 1,08  | 5,42E-02 | 2,20E-01 |
| <i>CA420826</i>        | 1,11  | 5,42E-02 | 2,20E-01 |
| <i>ENST00000339892</i> | 1,17  | 5,42E-02 | 2,20E-01 |
| <i>LOC285535</i>       | -1,16 | 5,42E-02 | 2,20E-01 |
| <i>AK057970</i>        | -1,12 | 5,42E-02 | 2,20E-01 |
| <i>THC2376586</i>      | -1,12 | 5,43E-02 | 2,20E-01 |
| <i>CB240572</i>        | -1,11 | 5,42E-02 | 2,20E-01 |

|                     |       |          |          |
|---------------------|-------|----------|----------|
| <i>SEC31L1</i>      | -1,10 | 5,42E-02 | 2,20E-01 |
| <i>NALP2</i>        | -1,09 | 5,43E-02 | 2,20E-01 |
| <i>GRAP2</i>        | -1,05 | 5,43E-02 | 2,20E-01 |
| <i>F13B</i>         | 1,07  | 5,43E-02 | 2,20E-01 |
| <i>UBR2</i>         | 1,08  | 5,43E-02 | 2,20E-01 |
| <i>THC2442494</i>   | 1,08  | 5,43E-02 | 2,20E-01 |
| <i>BE003490</i>     | 1,10  | 5,42E-02 | 2,20E-01 |
| <i>ZNF508</i>       | 1,11  | 5,43E-02 | 2,20E-01 |
| <i>A_24_P761490</i> | 1,11  | 5,43E-02 | 2,20E-01 |
| <i>VPS37C</i>       | 1,09  | 5,43E-02 | 2,20E-01 |
| <i>FRS2</i>         | 1,13  | 5,44E-02 | 2,20E-01 |
| <i>C6orf32</i>      | -1,18 | 5,44E-02 | 2,20E-01 |
| <i>WDR12</i>        | -1,10 | 5,44E-02 | 2,20E-01 |
| <i>A_24_P592560</i> | 1,07  | 5,44E-02 | 2,20E-01 |
| <i>AW138903</i>     | 1,16  | 5,44E-02 | 2,20E-01 |
| <i>CV569822</i>     | 1,09  | 5,44E-02 | 2,20E-01 |
| <i>TMPRSS11B</i>    | -1,56 | 5,44E-02 | 2,21E-01 |
| <i>LOC284242</i>    | -1,06 | 5,45E-02 | 2,21E-01 |
| <i>ACTN1</i>        | 1,22  | 5,45E-02 | 2,21E-01 |
| <i>THC2337941</i>   | -1,12 | 5,45E-02 | 2,21E-01 |
| <i>AF118067</i>     | -1,12 | 5,46E-02 | 2,21E-01 |
| <i>S80864</i>       | -1,06 | 5,46E-02 | 2,21E-01 |
| <i>COX6B1</i>       | 1,08  | 5,46E-02 | 2,21E-01 |
| <i>NFATC1</i>       | 1,18  | 5,46E-02 | 2,21E-01 |
| <i>PODXL</i>        | 1,21  | 5,46E-02 | 2,21E-01 |
| <i>AK094117</i>     | 1,08  | 5,46E-02 | 2,21E-01 |
| <i>ACTN2</i>        | 1,22  | 5,46E-02 | 2,21E-01 |
| <i>A_32_P157671</i> | 1,14  | 5,47E-02 | 2,21E-01 |
| <i>CDH2</i>         | 1,40  | 5,48E-02 | 2,21E-01 |
| <i>ANKRD23</i>      | -1,10 | 5,48E-02 | 2,21E-01 |
| <i>A_24_P273303</i> | -1,09 | 5,48E-02 | 2,21E-01 |
| <i>GHR</i>          | 1,10  | 5,48E-02 | 2,21E-01 |
| <i>AF289566</i>     | -1,13 | 5,48E-02 | 2,22E-01 |
| <i>C10orf116</i>    | 1,17  | 5,48E-02 | 2,22E-01 |
| <i>ACTR8</i>        | -1,06 | 5,49E-02 | 2,22E-01 |
| <i>THC2308938</i>   | 1,07  | 5,49E-02 | 2,22E-01 |
| <i>BM857492</i>     | 1,08  | 5,49E-02 | 2,22E-01 |
| <i>PREB</i>         | -1,19 | 5,49E-02 | 2,22E-01 |
| <i>AF267875</i>     | -1,43 | 5,50E-02 | 2,22E-01 |
| <i>ST3GAL5</i>      | -1,16 | 5,50E-02 | 2,22E-01 |
| <i>NUP107</i>       | -1,10 | 5,50E-02 | 2,22E-01 |
| <i>CCNL2</i>        | -1,09 | 5,50E-02 | 2,22E-01 |
| <i>A_24_P7785</i>   | 1,11  | 5,50E-02 | 2,22E-01 |
| <i>THC2253672</i>   | 1,09  | 5,50E-02 | 2,22E-01 |



|                        |       |          |          |
|------------------------|-------|----------|----------|
| <i>P2RY2</i>           | 1,21  | 5,50E-02 | 2,22E-01 |
| <i>ENST00000242110</i> | 1,08  | 5,50E-02 | 2,22E-01 |
| <i>APH1B</i>           | 1,09  | 5,50E-02 | 2,22E-01 |
| <i>C2orf31</i>         | -1,42 | 5,51E-02 | 2,22E-01 |
| <i>HSFX1</i>           | -1,07 | 5,51E-02 | 2,22E-01 |
| <i>THC2282652</i>      | 1,08  | 5,51E-02 | 2,22E-01 |
| <i>PKLR</i>            | -1,07 | 5,51E-02 | 2,22E-01 |
| <i>TUBB2A</i>          | 1,17  | 5,52E-02 | 2,22E-01 |
| <i>ACVR2B</i>          | -1,13 | 5,52E-02 | 2,22E-01 |
| <i>TERF1</i>           | 1,05  | 5,52E-02 | 2,23E-01 |
| <i>AI675560</i>        | 1,06  | 5,52E-02 | 2,23E-01 |
| <i>SLC5A6</i>          | -1,11 | 5,53E-02 | 2,23E-01 |
| <i>AL080082</i>        | -1,11 | 5,53E-02 | 2,23E-01 |
| <i>AQP2</i>            | 1,12  | 5,53E-02 | 2,23E-01 |
| <i>SLC2A3P1</i>        | 1,08  | 5,53E-02 | 2,23E-01 |
| <i>A_32_P155043</i>    | -1,08 | 5,53E-02 | 2,23E-01 |
| <i>DB379047</i>        | 1,14  | 5,54E-02 | 2,23E-01 |
| <i>TRHR</i>            | 1,07  | 5,54E-02 | 2,23E-01 |
| <i>GJB7</i>            | 1,12  | 5,54E-02 | 2,23E-01 |
| <i>KITLG</i>           | -1,13 | 5,54E-02 | 2,23E-01 |
| <i>PLEKHA6</i>         | -1,44 | 5,55E-02 | 2,23E-01 |
| <i>LOC643355</i>       | -1,23 | 5,55E-02 | 2,23E-01 |
| <i>SFXN4</i>           | -1,08 | 5,55E-02 | 2,23E-01 |
| <i>BC024289</i>        | -1,84 | 5,55E-02 | 2,23E-01 |
| <i>TMEM103</i>         | -1,06 | 5,55E-02 | 2,23E-01 |
| <i>FLJ37201</i>        | -1,09 | 5,55E-02 | 2,23E-01 |
| <i>THC2286912</i>      | -1,05 | 5,55E-02 | 2,23E-01 |
| <i>RP3-366L4.2</i>     | -1,06 | 5,56E-02 | 2,24E-01 |
| <i>RTBDN</i>           | 1,09  | 5,56E-02 | 2,24E-01 |
| <i>MAGEH1</i>          | -1,10 | 5,56E-02 | 2,24E-01 |
| <i>ENST00000321448</i> | -1,15 | 5,56E-02 | 2,24E-01 |
| <i>ZNF38</i>           | -1,07 | 5,57E-02 | 2,24E-01 |
| <i>AF483645</i>        | -1,11 | 5,57E-02 | 2,24E-01 |
| <i>BC021296</i>        | -1,07 | 5,57E-02 | 2,24E-01 |
| <i>LRRC19</i>          | -1,06 | 5,57E-02 | 2,24E-01 |
| <i>SLCO1A2</i>         | 1,08  | 5,57E-02 | 2,24E-01 |
| <i>FAM55D</i>          | -1,09 | 5,57E-02 | 2,24E-01 |
| <i>THC2415723</i>      | -1,07 | 5,57E-02 | 2,24E-01 |
| <i>THC2282993</i>      | -1,14 | 5,57E-02 | 2,24E-01 |
| <i>THC2434173</i>      | 1,07  | 5,57E-02 | 2,24E-01 |
| <i>C8orf22</i>         | -1,13 | 5,58E-02 | 2,24E-01 |
| <i>BX444658</i>        | -1,22 | 5,58E-02 | 2,24E-01 |
| <i>BTNL9</i>           | 1,15  | 5,58E-02 | 2,24E-01 |
| <i>ZCCHC9</i>          | -1,08 | 5,59E-02 | 2,24E-01 |

|                        |       |          |          |
|------------------------|-------|----------|----------|
| <i>MN1</i>             | 1,12  | 5,59E-02 | 2,24E-01 |
| <i>PRKAR2A</i>         | 1,08  | 5,59E-02 | 2,24E-01 |
| <i>ADAMTS18</i>        | 1,13  | 5,59E-02 | 2,24E-01 |
| <i>MRPS6</i>           | 1,08  | 5,59E-02 | 2,24E-01 |
| <i>AF116714</i>        | 1,07  | 5,60E-02 | 2,24E-01 |
| <i>TMSL3</i>           | 1,08  | 5,60E-02 | 2,24E-01 |
| <i>CN430008</i>        | -1,08 | 5,60E-02 | 2,25E-01 |
| <i>LOC643201</i>       | -1,10 | 5,61E-02 | 2,25E-01 |
| <i>AK123297</i>        | -1,08 | 5,61E-02 | 2,25E-01 |
| <i>TRAF5</i>           | -1,13 | 5,61E-02 | 2,25E-01 |
| <i>THC2343897</i>      | -1,08 | 5,61E-02 | 2,25E-01 |
| <i>LOC648294</i>       | -1,06 | 5,62E-02 | 2,25E-01 |
| <i>MAPRE1</i>          | 1,13  | 5,62E-02 | 2,25E-01 |
| <i>AK056245</i>        | 1,10  | 5,62E-02 | 2,25E-01 |
| <i>TTY23</i>           | -1,06 | 5,62E-02 | 2,25E-01 |
| <i>LRRC3</i>           | -1,07 | 5,63E-02 | 2,25E-01 |
| <i>MELK</i>            | -1,11 | 5,64E-02 | 2,26E-01 |
| <i>NAB2</i>            | -1,09 | 5,64E-02 | 2,26E-01 |
| <i>FUT10</i>           | 1,06  | 5,64E-02 | 2,26E-01 |
| <i>ENST00000379392</i> | 1,06  | 5,63E-02 | 2,26E-01 |
| <i>C1orf58</i>         | 1,10  | 5,63E-02 | 2,26E-01 |
| <i>PSCD1</i>           | 1,15  | 5,64E-02 | 2,26E-01 |
| <i>STK23</i>           | 1,18  | 5,64E-02 | 2,26E-01 |
| <i>CR611166</i>        | -1,08 | 5,64E-02 | 2,26E-01 |
| <i>LOC158863</i>       | -1,14 | 5,64E-02 | 2,26E-01 |
| <i>A_24_P913411</i>    | -1,07 | 5,65E-02 | 2,26E-01 |
| <i>BF088423</i>        | 1,06  | 5,65E-02 | 2,26E-01 |
| <i>GJC1</i>            | 1,08  | 5,65E-02 | 2,26E-01 |
| <i>BI818647</i>        | 1,08  | 5,65E-02 | 2,26E-01 |
| <i>AK095097</i>        | -1,11 | 5,65E-02 | 2,26E-01 |
| <i>JTV1</i>            | -1,09 | 5,65E-02 | 2,26E-01 |
| <i>LOC257396</i>       | -1,13 | 5,65E-02 | 2,26E-01 |
| <i>AL365520</i>        | -1,12 | 5,65E-02 | 2,26E-01 |
| <i>TUSC3</i>           | -1,14 | 5,66E-02 | 2,26E-01 |
| <i>DQ100868</i>        | -1,09 | 5,66E-02 | 2,26E-01 |
| <i>EPB49</i>           | 1,12  | 5,66E-02 | 2,26E-01 |
| <i>AK094947</i>        | -1,11 | 5,66E-02 | 2,26E-01 |
| <i>LOC440455</i>       | -1,08 | 5,66E-02 | 2,26E-01 |
| <i>TUBB2C</i>          | 1,15  | 5,66E-02 | 2,26E-01 |
| <i>KRT9</i>            | 1,13  | 5,66E-02 | 2,26E-01 |
| <i>MRPL3</i>           | -1,08 | 5,67E-02 | 2,26E-01 |
| <i>BC022395</i>        | -1,06 | 5,67E-02 | 2,26E-01 |
| <i>A_23_P159163</i>    | -1,41 | 5,67E-02 | 2,26E-01 |
| <i>FLJ36868</i>        | -1,12 | 5,67E-02 | 2,26E-01 |

|                        |       |          |          |
|------------------------|-------|----------|----------|
| <i>A_24_P408449</i>    | -1,10 | 5,67E-02 | 2,26E-01 |
| <i>AK022004</i>        | -1,09 | 5,67E-02 | 2,26E-01 |
| <i>CDH6</i>            | 1,17  | 5,68E-02 | 2,26E-01 |
| <i>BAIAP3</i>          | -1,12 | 5,68E-02 | 2,26E-01 |
| <i>RBMS1</i>           | 1,07  | 5,68E-02 | 2,26E-01 |
| <i>C6orf49</i>         | -1,06 | 5,68E-02 | 2,26E-01 |
| <i>AI090937</i>        | -1,11 | 5,68E-02 | 2,26E-01 |
| <i>C14orf54</i>        | 1,06  | 5,68E-02 | 2,26E-01 |
| <i>DA741794</i>        | -1,10 | 5,68E-02 | 2,27E-01 |
| <i>THC2351101</i>      | -1,11 | 5,69E-02 | 2,27E-01 |
| <i>S75896</i>          | 1,11  | 5,69E-02 | 2,27E-01 |
| <i>WFDC12</i>          | -1,09 | 5,69E-02 | 2,27E-01 |
| <i>BX119852</i>        | 1,37  | 5,69E-02 | 2,27E-01 |
| <i>THC2442819</i>      | -1,61 | 5,69E-02 | 2,27E-01 |
| <i>ENST00000327926</i> | -1,59 | 5,70E-02 | 2,27E-01 |
| <i>CXCL14</i>          | -1,51 | 5,70E-02 | 2,27E-01 |
| <i>PCDHB17</i>         | -1,09 | 5,70E-02 | 2,27E-01 |
| <i>CNTROB</i>          | -1,06 | 5,70E-02 | 2,27E-01 |
| <i>A_23_P13202</i>     | 1,08  | 5,70E-02 | 2,27E-01 |
| <i>AK091034</i>        | 1,08  | 5,70E-02 | 2,27E-01 |
| <i>IL17RC</i>          | 1,09  | 5,69E-02 | 2,27E-01 |
| <i>PRIC285</i>         | 1,10  | 5,70E-02 | 2,27E-01 |
| <i>A_24_P161655</i>    | 1,12  | 5,69E-02 | 2,27E-01 |
| <i>A_24_P717586</i>    | 1,14  | 5,70E-02 | 2,27E-01 |
| <i>THC2431729</i>      | 1,15  | 5,69E-02 | 2,27E-01 |
| <i>ABRA</i>            | 1,38  | 5,70E-02 | 2,27E-01 |
| <i>TEC</i>             | -1,06 | 5,70E-02 | 2,27E-01 |
| <i>ENST00000269477</i> | 1,13  | 5,70E-02 | 2,27E-01 |
| <i>NOTCH1</i>          | 1,09  | 5,70E-02 | 2,27E-01 |
| <i>A_24_P170357</i>    | -1,08 | 5,70E-02 | 2,27E-01 |
| <i>SOX11</i>           | 1,09  | 5,71E-02 | 2,27E-01 |
| <i>C3orf63</i>         | -1,06 | 5,71E-02 | 2,27E-01 |
| <i>VEPH1</i>           | -1,16 | 5,72E-02 | 2,27E-01 |
| <i>THC2444763</i>      | -1,08 | 5,72E-02 | 2,27E-01 |
| <i>TMTC1</i>           | 1,16  | 5,72E-02 | 2,27E-01 |
| <i>PCSK2</i>           | 1,35  | 5,72E-02 | 2,27E-01 |
| <i>BF509345</i>        | -1,08 | 5,72E-02 | 2,27E-01 |
| <i>FBXO2</i>           | -1,27 | 5,73E-02 | 2,27E-01 |
| <i>CR620892</i>        | -1,21 | 5,73E-02 | 2,27E-01 |
| <i>ENST00000368945</i> | -1,10 | 5,73E-02 | 2,27E-01 |
| <i>H66958</i>          | -1,10 | 5,73E-02 | 2,27E-01 |
| <i>ZNF211</i>          | -1,07 | 5,73E-02 | 2,27E-01 |
| <i>THC2281903</i>      | 1,07  | 5,73E-02 | 2,27E-01 |
| <i>KLK1</i>            | -1,17 | 5,73E-02 | 2,27E-01 |

|                        |       |          |          |
|------------------------|-------|----------|----------|
| <i>LOC126208</i>       | 1,09  | 5,73E-02 | 2,27E-01 |
| <i>GARNL1</i>          | -1,08 | 5,73E-02 | 2,27E-01 |
| <i>OTUD7A</i>          | 1,07  | 5,73E-02 | 2,27E-01 |
| <i>A_24_P552987</i>    | -1,08 | 5,74E-02 | 2,28E-01 |
| <i>KRT24</i>           | -1,23 | 5,74E-02 | 2,28E-01 |
| <i>AK057923</i>        | -1,22 | 5,74E-02 | 2,28E-01 |
| <i>GCC2</i>            | 1,07  | 5,75E-02 | 2,28E-01 |
| <i>PRM3</i>            | 1,13  | 5,75E-02 | 2,28E-01 |
| <i>CAB39</i>           | 1,08  | 5,75E-02 | 2,28E-01 |
| <i>LOC317671</i>       | -1,07 | 5,76E-02 | 2,28E-01 |
| <i>C12orf57</i>        | -1,07 | 5,76E-02 | 2,28E-01 |
| <i>THC2284017</i>      | -1,12 | 5,77E-02 | 2,28E-01 |
| <i>USP39</i>           | -1,05 | 5,77E-02 | 2,28E-01 |
| <i>ANKRD55</i>         | -1,06 | 5,77E-02 | 2,29E-01 |
| <i>THAP2</i>           | -1,14 | 5,77E-02 | 2,29E-01 |
| <i>NDUFA11</i>         | 1,07  | 5,77E-02 | 2,29E-01 |
| <i>MCCC1</i>           | -1,10 | 5,77E-02 | 2,29E-01 |
| <i>LYZL2</i>           | 1,07  | 5,77E-02 | 2,29E-01 |
| <i>RBM16</i>           | -1,07 | 5,77E-02 | 2,29E-01 |
| <i>LOC284933</i>       | 1,09  | 5,77E-02 | 2,29E-01 |
| <i>DUB3</i>            | 1,07  | 5,78E-02 | 2,29E-01 |
| <i>RPS6</i>            | -1,05 | 5,78E-02 | 2,29E-01 |
| <i>LOC642675</i>       | 1,07  | 5,78E-02 | 2,29E-01 |
| <i>PFKP</i>            | 1,24  | 5,78E-02 | 2,29E-01 |
| <i>A_32_P202778</i>    | 1,08  | 5,79E-02 | 2,29E-01 |
| <i>HIST2H4A</i>        | 1,13  | 5,79E-02 | 2,29E-01 |
| <i>USP37</i>           | -1,07 | 5,79E-02 | 2,29E-01 |
| <i>HSPC105</i>         | 1,07  | 5,79E-02 | 2,29E-01 |
| <i>GALR1</i>           | 1,17  | 5,79E-02 | 2,29E-01 |
| <i>DYRK2</i>           | 1,10  | 5,79E-02 | 2,29E-01 |
| <i>STARD6</i>          | -1,05 | 5,79E-02 | 2,29E-01 |
| <i>MUM1L1</i>          | -1,51 | 5,80E-02 | 2,29E-01 |
| <i>IL24</i>            | 1,05  | 5,80E-02 | 2,29E-01 |
| <i>THC2233838</i>      | -1,13 | 5,81E-02 | 2,29E-01 |
| <i>C10orf118</i>       | 1,06  | 5,81E-02 | 2,29E-01 |
| <i>A_24_P927693</i>    | 1,08  | 5,81E-02 | 2,29E-01 |
| <i>THSD3</i>           | 1,12  | 5,81E-02 | 2,29E-01 |
| <i>ENST00000327299</i> | 1,12  | 5,81E-02 | 2,29E-01 |
| <i>LOC389043</i>       | 1,14  | 5,81E-02 | 2,29E-01 |
| <i>PYCARD</i>          | -1,10 | 5,81E-02 | 2,29E-01 |
| <i>AL834444</i>        | 1,07  | 5,81E-02 | 2,29E-01 |
| <i>KIAA1267</i>        | -1,09 | 5,82E-02 | 2,30E-01 |
| <i>FAM76B</i>          | -1,11 | 5,82E-02 | 2,30E-01 |
| <i>UTX</i>             | -1,08 | 5,83E-02 | 2,30E-01 |

|                 |       |          |          |
|-----------------|-------|----------|----------|
| ZBP1            | -1,06 | 5,83E-02 | 2,30E-01 |
| BC092452        | 1,07  | 5,83E-02 | 2,30E-01 |
| CD672072        | 1,10  | 5,82E-02 | 2,30E-01 |
| NUDT6           | -1,09 | 5,83E-02 | 2,30E-01 |
| SRMS            | 1,06  | 5,83E-02 | 2,30E-01 |
| LOC388397       | -1,10 | 5,83E-02 | 2,30E-01 |
| THC2428199      | 1,10  | 5,83E-02 | 2,30E-01 |
| RGS22           | 1,12  | 5,83E-02 | 2,30E-01 |
| THC2405192      | 1,96  | 5,84E-02 | 2,30E-01 |
| GNRH1           | -1,18 | 5,84E-02 | 2,30E-01 |
| CREB3           | 1,07  | 5,84E-02 | 2,30E-01 |
| AL137474        | -1,08 | 5,84E-02 | 2,30E-01 |
| GAL3ST1         | 1,17  | 5,84E-02 | 2,30E-01 |
| BC005066        | -1,11 | 5,84E-02 | 2,30E-01 |
| OXR1            | 1,07  | 5,84E-02 | 2,30E-01 |
| ZNF593          | 1,10  | 5,85E-02 | 2,30E-01 |
| RP11-450P7.3    | 1,10  | 5,85E-02 | 2,30E-01 |
| APOB            | -1,06 | 5,85E-02 | 2,30E-01 |
| ENST00000367846 | 1,08  | 5,85E-02 | 2,30E-01 |
| SLMAP           | 1,38  | 5,85E-02 | 2,30E-01 |
| THC2441731      | -1,50 | 5,85E-02 | 2,30E-01 |
| AMT             | -1,13 | 5,85E-02 | 2,30E-01 |
| BTRC            | -1,07 | 5,85E-02 | 2,30E-01 |
| LRRC54          | 1,19  | 5,85E-02 | 2,30E-01 |
| BHLHB5          | 1,12  | 5,86E-02 | 2,30E-01 |
| ENST00000292530 | -1,08 | 5,86E-02 | 2,30E-01 |
| TOE1            | 1,07  | 5,86E-02 | 2,30E-01 |
| ACCN1           | -1,46 | 5,86E-02 | 2,30E-01 |
| THC2412698      | -1,08 | 5,86E-02 | 2,30E-01 |
| A_24_P316767    | -1,07 | 5,86E-02 | 2,30E-01 |
| RPS17           | -1,06 | 5,86E-02 | 2,30E-01 |
| ADD2            | 1,05  | 5,86E-02 | 2,30E-01 |
| A_24_P935967    | 1,08  | 5,86E-02 | 2,30E-01 |
| PIK3CA          | 1,08  | 5,87E-02 | 2,31E-01 |
| TSKS            | -1,10 | 5,87E-02 | 2,31E-01 |
| PPP2CA          | 1,10  | 5,87E-02 | 2,31E-01 |
| WNT2B           | 1,22  | 5,87E-02 | 2,31E-01 |
| IRX5            | 1,47  | 5,87E-02 | 2,31E-01 |
| TRAF3IP2        | -1,11 | 5,88E-02 | 2,31E-01 |
| AV739766        | -1,24 | 5,88E-02 | 2,31E-01 |
| A_32_P94521     | -1,14 | 5,88E-02 | 2,31E-01 |
| MTERFD3         | -1,09 | 5,88E-02 | 2,31E-01 |
| AF116641        | -1,06 | 5,88E-02 | 2,31E-01 |
| AA708933        | 1,08  | 5,89E-02 | 2,31E-01 |

|                 |       |          |          |
|-----------------|-------|----------|----------|
| ARNTL2          | 1,14  | 5,89E-02 | 2,31E-01 |
| SYPL1           | -1,11 | 5,89E-02 | 2,31E-01 |
| MGC11102        | -1,08 | 5,89E-02 | 2,31E-01 |
| ENST00000324663 | 1,08  | 5,89E-02 | 2,31E-01 |
| CNNM2           | 1,08  | 5,89E-02 | 2,31E-01 |
| THC2332128      | -1,35 | 5,90E-02 | 2,31E-01 |
| HIST1H2BI       | -1,09 | 5,89E-02 | 2,31E-01 |
| LOC151534       | 1,08  | 5,89E-02 | 2,31E-01 |
| CD79A           | 1,11  | 5,89E-02 | 2,31E-01 |
| AA583689        | -1,17 | 5,90E-02 | 2,31E-01 |
| CTXN1           | -1,22 | 5,90E-02 | 2,31E-01 |
| TAPBP           | 1,08  | 5,91E-02 | 2,31E-01 |
| LOC136306       | -1,09 | 5,91E-02 | 2,32E-01 |
| NT5C3L          | 1,07  | 5,91E-02 | 2,32E-01 |
| OSR1            | 1,14  | 5,91E-02 | 2,32E-01 |
| HAPLN1          | 1,38  | 5,91E-02 | 2,32E-01 |
| VPS18           | 1,42  | 5,91E-02 | 2,32E-01 |
| BC036018        | -1,14 | 5,92E-02 | 2,32E-01 |
| S100A3          | 1,17  | 5,92E-02 | 2,32E-01 |
| FLJ14126        | 1,08  | 5,92E-02 | 2,32E-01 |
| PRR8            | -1,07 | 5,92E-02 | 2,32E-01 |
| AI381562        | -1,21 | 5,93E-02 | 2,32E-01 |
| BE739632        | -1,11 | 5,93E-02 | 2,32E-01 |
| AL573187        | 1,07  | 5,93E-02 | 2,32E-01 |
| MAP2K6          | 1,09  | 5,93E-02 | 2,32E-01 |
| SEMA5A          | -1,20 | 5,93E-02 | 2,32E-01 |
| OTOP2           | 1,06  | 5,93E-02 | 2,32E-01 |
| ALDOA           | 1,09  | 5,93E-02 | 2,32E-01 |
| A_24_P928031    | 1,14  | 5,93E-02 | 2,32E-01 |
| AK096677        | -1,08 | 5,94E-02 | 2,32E-01 |
| EIF3S10         | 1,10  | 5,94E-02 | 2,32E-01 |
| A_32_P223245    | 1,07  | 5,94E-02 | 2,32E-01 |
| THC2409988      | 1,08  | 5,94E-02 | 2,32E-01 |
| PRKD2           | 1,11  | 5,94E-02 | 2,32E-01 |
| A_24_P187304    | -1,08 | 5,94E-02 | 2,32E-01 |
| DYNC2LI1        | -1,06 | 5,94E-02 | 2,32E-01 |
| W72519          | 1,12  | 5,94E-02 | 2,32E-01 |
| AZIN1           | 1,08  | 5,95E-02 | 2,32E-01 |
| ZDHHC12         | 1,08  | 5,95E-02 | 2,32E-01 |
| AK024868        | 1,07  | 5,95E-02 | 2,32E-01 |
| ENST00000367590 | 1,08  | 5,95E-02 | 2,32E-01 |
| THC2240065      | 1,07  | 5,95E-02 | 2,32E-01 |
| TMEM116         | -1,11 | 5,96E-02 | 2,32E-01 |
| SLC26A3         | -1,10 | 5,96E-02 | 2,32E-01 |

|                        |       |          |          |
|------------------------|-------|----------|----------|
| <i>BQ182271</i>        | 1,08  | 5,96E-02 | 2,32E-01 |
| <i>THC2279765</i>      | 1,09  | 5,96E-02 | 2,32E-01 |
| <i>ZMYND10</i>         | -1,06 | 5,96E-02 | 2,33E-01 |
| <i>BTBD9</i>           | 1,06  | 5,96E-02 | 2,33E-01 |
| <i>LOC284033</i>       | -1,56 | 5,96E-02 | 2,33E-01 |
| <i>HLA-C</i>           | -1,10 | 5,96E-02 | 2,33E-01 |
| <i>ZNF155</i>          | -1,07 | 5,97E-02 | 2,33E-01 |
| <i>BMPR1B</i>          | 1,10  | 5,97E-02 | 2,33E-01 |
| <i>A_24_P358215</i>    | 1,16  | 5,97E-02 | 2,33E-01 |
| <i>A_24_P940012</i>    | 1,07  | 5,97E-02 | 2,33E-01 |
| <i>PTPRH</i>           | -1,14 | 5,98E-02 | 2,33E-01 |
| <i>C21orf96</i>        | -1,13 | 5,98E-02 | 2,33E-01 |
| <i>ING4</i>            | -1,10 | 5,98E-02 | 2,33E-01 |
| <i>APOBEC1</i>         | -1,06 | 5,98E-02 | 2,33E-01 |
| <i>ENST00000342773</i> | 1,07  | 5,97E-02 | 2,33E-01 |
| <i>LOC643669</i>       | 1,10  | 5,98E-02 | 2,33E-01 |
| <i>SRP19</i>           | 1,11  | 5,98E-02 | 2,33E-01 |
| <i>39692</i>           | 1,11  | 5,98E-02 | 2,33E-01 |
| <i>A_24_P921801</i>    | 1,12  | 5,98E-02 | 2,33E-01 |
| <i>A_24_P324214</i>    | 1,17  | 5,98E-02 | 2,33E-01 |
| <i>ARHGAP9</i>         | -1,16 | 5,98E-02 | 2,33E-01 |
| <i>FBXO41</i>          | -1,14 | 5,98E-02 | 2,33E-01 |
| <i>AK098360</i>        | 1,06  | 5,98E-02 | 2,33E-01 |
| <i>BX106115</i>        | -1,16 | 5,99E-02 | 2,33E-01 |
| <i>ARHGDIB</i>         | -1,08 | 5,99E-02 | 2,33E-01 |
| <i>FLJ38668</i>        | -1,06 | 5,99E-02 | 2,33E-01 |
| <i>ARL2</i>            | 1,07  | 5,99E-02 | 2,33E-01 |
| <i>LOC283278</i>       | 1,08  | 6,00E-02 | 2,33E-01 |
| <i>PTK2</i>            | 1,11  | 6,00E-02 | 2,33E-01 |
| <i>LRP6</i>            | -1,07 | 6,00E-02 | 2,33E-01 |
| <i>THC2455655</i>      | 1,06  | 6,00E-02 | 2,33E-01 |
| <i>A_24_P622697</i>    | 1,11  | 6,00E-02 | 2,33E-01 |
| <i>DDX52</i>           | 1,06  | 6,00E-02 | 2,33E-01 |
| <i>TADA3L</i>          | -1,08 | 6,01E-02 | 2,33E-01 |
| <i>AK054946</i>        | -1,10 | 6,01E-02 | 2,34E-01 |
| <i>FAM20C</i>          | 1,15  | 6,01E-02 | 2,34E-01 |
| <i>TOP2A</i>           | -1,14 | 6,02E-02 | 2,34E-01 |
| <i>AF361250</i>        | -1,07 | 6,01E-02 | 2,34E-01 |
| <i>DAOA</i>            | 1,06  | 6,02E-02 | 2,34E-01 |
| <i>THC2376027</i>      | -1,11 | 6,02E-02 | 2,34E-01 |
| <i>ENST00000273353</i> | -1,07 | 6,02E-02 | 2,34E-01 |
| <i>CTGLF1</i>          | -1,09 | 6,02E-02 | 2,34E-01 |
| <i>NLGN4Y</i>          | 1,07  | 6,03E-02 | 2,34E-01 |
| <i>LOC440836</i>       | 1,09  | 6,03E-02 | 2,34E-01 |

|                        |       |          |          |
|------------------------|-------|----------|----------|
| <i>C10orf63</i>        | 1,06  | 6,03E-02 | 2,34E-01 |
| <i>IL32</i>            | 1,11  | 6,03E-02 | 2,34E-01 |
| <i>CXorf22</i>         | -1,05 | 6,03E-02 | 2,34E-01 |
| <i>FILIP1</i>          | 1,36  | 6,04E-02 | 2,34E-01 |
| <i>AF318337</i>        | -1,09 | 6,04E-02 | 2,34E-01 |
| <i>AJ001874</i>        | -1,06 | 6,04E-02 | 2,34E-01 |
| <i>AK092264</i>        | -1,06 | 6,04E-02 | 2,34E-01 |
| <i>THC2438981</i>      | 1,11  | 6,04E-02 | 2,34E-01 |
| <i>A_24_P617278</i>    | 1,09  | 6,04E-02 | 2,34E-01 |
| <i>GABRA2</i>          | 1,15  | 6,05E-02 | 2,34E-01 |
| <i>A_24_P556328</i>    | -1,17 | 6,05E-02 | 2,34E-01 |
| <i>Z20144</i>          | 1,09  | 6,05E-02 | 2,35E-01 |
| <i>ENST00000375816</i> | -1,08 | 6,06E-02 | 2,35E-01 |
| <i>AI570381</i>        | -1,08 | 6,06E-02 | 2,35E-01 |
| <i>RECQL</i>           | 1,09  | 6,06E-02 | 2,35E-01 |
| <i>MAK10</i>           | -1,07 | 6,06E-02 | 2,35E-01 |
| <i>A_24_P238786</i>    | -1,06 | 6,06E-02 | 2,35E-01 |
| <i>AK055145</i>        | 1,08  | 6,06E-02 | 2,35E-01 |
| <i>CDH26</i>           | 1,14  | 6,06E-02 | 2,35E-01 |
| <i>FIGF</i>            | -1,39 | 6,07E-02 | 2,35E-01 |
| <i>THC2315567</i>      | -1,10 | 6,07E-02 | 2,35E-01 |
| <i>YAF2</i>            | 1,09  | 6,07E-02 | 2,35E-01 |
| <i>THC2306239</i>      | 1,09  | 6,07E-02 | 2,35E-01 |
| <i>C13orf3</i>         | -1,08 | 6,08E-02 | 2,35E-01 |
| <i>ATP11C</i>          | 1,07  | 6,08E-02 | 2,35E-01 |
| <i>CDC48</i>           | -1,10 | 6,08E-02 | 2,35E-01 |
| <i>FLJ13197</i>        | -1,13 | 6,09E-02 | 2,35E-01 |
| <i>ADIPOQ</i>          | -1,07 | 6,08E-02 | 2,35E-01 |
| <i>A_24_P936092</i>    | -1,07 | 6,09E-02 | 2,35E-01 |
| <i>ZNF403</i>          | 1,06  | 6,09E-02 | 2,35E-01 |
| <i>GAB1</i>            | 1,09  | 6,09E-02 | 2,35E-01 |
| <i>RAB8A</i>           | 1,09  | 6,09E-02 | 2,35E-01 |
| <i>KIAA1546</i>        | 1,12  | 6,09E-02 | 2,35E-01 |
| <i>PTRF</i>            | 1,11  | 6,09E-02 | 2,35E-01 |
| <i>THC2283529</i>      | -1,09 | 6,09E-02 | 2,35E-01 |
| <i>FCER1G</i>          | -1,15 | 6,10E-02 | 2,36E-01 |
| <i>NUFIP1</i>          | -1,08 | 6,10E-02 | 2,36E-01 |
| <i>IL2RA</i>           | -1,06 | 6,10E-02 | 2,36E-01 |
| <i>COL12A1</i>         | -1,19 | 6,10E-02 | 2,36E-01 |
| <i>SLC3A1</i>          | 1,08  | 6,11E-02 | 2,36E-01 |
| <i>A_24_P255252</i>    | -1,10 | 6,11E-02 | 2,36E-01 |
| <i>A_32_P171984</i>    | 1,06  | 6,11E-02 | 2,36E-01 |
| <i>ADRA1D</i>          | 1,11  | 6,11E-02 | 2,36E-01 |
| <i>NDNL2</i>           | 1,06  | 6,12E-02 | 2,36E-01 |



|                        |       |          |          |
|------------------------|-------|----------|----------|
| <i>ARL17P1</i>         | -1,17 | 6,12E-02 | 2,36E-01 |
| <i>ENST00000337273</i> | -1,13 | 6,12E-02 | 2,36E-01 |
| <i>B4GALT5</i>         | 1,11  | 6,12E-02 | 2,36E-01 |
| <i>C20orf42</i>        | -1,16 | 6,12E-02 | 2,36E-01 |
| <i>ALG9</i>            | -1,05 | 6,13E-02 | 2,36E-01 |
| <i>ENST00000374112</i> | 1,07  | 6,13E-02 | 2,36E-01 |
| <i>JAM3</i>            | 1,15  | 6,13E-02 | 2,36E-01 |
| <i>ZNF230</i>          | -1,07 | 6,13E-02 | 2,36E-01 |
| <i>MGC18216</i>        | 1,11  | 6,13E-02 | 2,36E-01 |
| <i>PTPLAD2</i>         | -1,11 | 6,13E-02 | 2,36E-01 |
| <i>A_24_P393087</i>    | 1,05  | 6,13E-02 | 2,36E-01 |
| <i>SNORD22</i>         | 1,09  | 6,14E-02 | 2,37E-01 |
| <i>ZFAND2A</i>         | 1,10  | 6,14E-02 | 2,37E-01 |
| <i>ARL14</i>           | -1,06 | 6,14E-02 | 2,37E-01 |
| <i>CEP72</i>           | -1,11 | 6,14E-02 | 2,37E-01 |
| <i>ENST00000260972</i> | -1,08 | 6,14E-02 | 2,37E-01 |
| <i>RCC2</i>            | -1,07 | 6,14E-02 | 2,37E-01 |
| <i>BM984396</i>        | -1,30 | 6,15E-02 | 2,37E-01 |
| <i>ENST00000369285</i> | -1,06 | 6,15E-02 | 2,37E-01 |
| <i>GPR110</i>          | -1,10 | 6,15E-02 | 2,37E-01 |
| <i>C14orf131</i>       | -1,06 | 6,15E-02 | 2,37E-01 |
| <i>STATH</i>           | 1,07  | 6,16E-02 | 2,37E-01 |
| <i>TRIM40</i>          | 1,08  | 6,15E-02 | 2,37E-01 |
| <i>THC2310027</i>      | -1,17 | 6,16E-02 | 2,37E-01 |
| <i>CAPN11</i>          | -1,08 | 6,16E-02 | 2,37E-01 |
| <i>IGFALS</i>          | 1,07  | 6,16E-02 | 2,37E-01 |
| <i>TRAPPC6A</i>        | 1,05  | 6,16E-02 | 2,37E-01 |
| <i>NP511407</i>        | 1,07  | 6,16E-02 | 2,37E-01 |
| <i>LOC553137</i>       | 1,08  | 6,17E-02 | 2,37E-01 |
| <i>ADAM10</i>          | 1,09  | 6,17E-02 | 2,37E-01 |
| <i>DENND1B</i>         | 1,06  | 6,17E-02 | 2,37E-01 |
| <i>PPIF</i>            | -1,14 | 6,18E-02 | 2,37E-01 |
| <i>BM678403</i>        | 1,06  | 6,18E-02 | 2,37E-01 |
| <i>AL050042</i>        | 1,11  | 6,18E-02 | 2,37E-01 |
| <i>COL4A4</i>          | -1,48 | 6,18E-02 | 2,37E-01 |
| <i>TMEM16F</i>         | -1,10 | 6,18E-02 | 2,37E-01 |
| <i>ZFP42</i>           | 1,27  | 6,18E-02 | 2,37E-01 |
| <i>N34499</i>          | 1,08  | 6,19E-02 | 2,38E-01 |
| <i>CR600908</i>        | 1,10  | 6,19E-02 | 2,38E-01 |
| <i>BE218351</i>        | -1,08 | 6,19E-02 | 2,38E-01 |
| <i>KIAA0286</i>        | -1,09 | 6,20E-02 | 2,38E-01 |
| <i>THC2287450</i>      | 1,20  | 6,20E-02 | 2,38E-01 |
| <i>ENST00000217204</i> | -1,13 | 6,20E-02 | 2,38E-01 |
| <i>AFAR3</i>           | -1,13 | 6,20E-02 | 2,38E-01 |

|                        |       |          |          |
|------------------------|-------|----------|----------|
| <i>THC2312578</i>      | -1,11 | 6,20E-02 | 2,38E-01 |
| <i>MAGEE2</i>          | -1,08 | 6,21E-02 | 2,38E-01 |
| <i>PRG2</i>            | 1,06  | 6,21E-02 | 2,38E-01 |
| <i>WBP4</i>            | 1,09  | 6,21E-02 | 2,38E-01 |
| <i>ELL3</i>            | -1,13 | 6,21E-02 | 2,38E-01 |
| <i>BX089701</i>        | -1,10 | 6,21E-02 | 2,38E-01 |
| <i>SCRN1</i>           | 1,08  | 6,21E-02 | 2,38E-01 |
| <i>THC2433384</i>      | -1,13 | 6,22E-02 | 2,38E-01 |
| <i>ENST00000317656</i> | 1,12  | 6,22E-02 | 2,39E-01 |
| <i>THC2280363</i>      | 1,09  | 6,22E-02 | 2,39E-01 |
| <i>PRICKLE1</i>        | -1,14 | 6,23E-02 | 2,39E-01 |
| <i>SERPIND1</i>        | -1,28 | 6,23E-02 | 2,39E-01 |
| <i>ODZ4</i>            | -1,22 | 6,23E-02 | 2,39E-01 |
| <i>BX107836</i>        | -1,10 | 6,23E-02 | 2,39E-01 |
| <i>THC2385437</i>      | -1,10 | 6,23E-02 | 2,39E-01 |
| <i>ENST00000304372</i> | -1,07 | 6,23E-02 | 2,39E-01 |
| <i>THC2317099</i>      | -1,10 | 6,24E-02 | 2,39E-01 |
| <i>CTCF</i>            | -1,06 | 6,24E-02 | 2,39E-01 |
| <i>AF293339</i>        | 1,07  | 6,24E-02 | 2,39E-01 |
| <i>TIMM44</i>          | 1,07  | 6,24E-02 | 2,39E-01 |
| <i>ADAM22</i>          | 1,14  | 6,24E-02 | 2,39E-01 |
| <i>LOC440421</i>       | 1,76  | 6,24E-02 | 2,39E-01 |
| <i>PEX3</i>            | -1,07 | 6,24E-02 | 2,39E-01 |
| <i>A_24_P899020</i>    | -1,19 | 6,25E-02 | 2,39E-01 |
| <i>ENST00000382790</i> | -1,19 | 6,25E-02 | 2,39E-01 |
| <i>ZNF85</i>           | -1,15 | 6,25E-02 | 2,39E-01 |
| <i>AF052146</i>        | -1,11 | 6,25E-02 | 2,39E-01 |
| <i>A_32_P124887</i>    | -1,09 | 6,25E-02 | 2,39E-01 |
| <i>FOXJ3</i>           | -1,08 | 6,25E-02 | 2,39E-01 |
| <i>ZBTB43</i>          | 1,08  | 6,25E-02 | 2,39E-01 |
| <i>TYRP1</i>           | 1,09  | 6,25E-02 | 2,39E-01 |
| <i>THC2408116</i>      | 1,11  | 6,26E-02 | 2,39E-01 |
| <i>A_24_P84268</i>     | 1,06  | 6,26E-02 | 2,39E-01 |
| <i>PCDHB5</i>          | -1,13 | 6,27E-02 | 2,39E-01 |
| <i>A_24_P711290</i>    | -1,08 | 6,26E-02 | 2,39E-01 |
| <i>PRMT5</i>           | -1,07 | 6,26E-02 | 2,39E-01 |
| <i>CR615245</i>        | -1,06 | 6,26E-02 | 2,39E-01 |
| <i>OLR1</i>            | 1,08  | 6,26E-02 | 2,39E-01 |
| <i>CSAG1</i>           | 1,08  | 6,26E-02 | 2,39E-01 |
| <i>LOC441208</i>       | 1,14  | 6,26E-02 | 2,39E-01 |
| <i>BM451513</i>        | 1,07  | 6,27E-02 | 2,39E-01 |
| <i>C10orf10</i>        | 1,25  | 6,27E-02 | 2,39E-01 |
| <i>LOC645445</i>       | 1,07  | 6,27E-02 | 2,39E-01 |
| <i>LOC200383</i>       | 1,05  | 6,28E-02 | 2,40E-01 |

|                        |       |          |          |
|------------------------|-------|----------|----------|
| <i>ODZ1</i>            | 1,09  | 6,28E-02 | 2,40E-01 |
| <i>ATOH1</i>           | 1,07  | 6,29E-02 | 2,40E-01 |
| <i>BX538272</i>        | -1,10 | 6,29E-02 | 2,40E-01 |
| <i>BRSK1</i>           | 1,09  | 6,29E-02 | 2,40E-01 |
| <i>AK055583</i>        | -1,10 | 6,30E-02 | 2,40E-01 |
| <i>AK057591</i>        | -1,09 | 6,30E-02 | 2,40E-01 |
| <i>SLC16A2</i>         | -1,08 | 6,30E-02 | 2,40E-01 |
| <i>AP2M1</i>           | 1,08  | 6,30E-02 | 2,40E-01 |
| <i>A_32_P149246</i>    | 1,10  | 6,29E-02 | 2,40E-01 |
| <i>CYP2A13</i>         | 1,12  | 6,29E-02 | 2,40E-01 |
| <i>NUBP1</i>           | 1,06  | 6,30E-02 | 2,40E-01 |
| <i>CR599788</i>        | 1,09  | 6,30E-02 | 2,40E-01 |
| <i>LETMD1</i>          | -1,12 | 6,30E-02 | 2,40E-01 |
| <i>LOC645581</i>       | 1,08  | 6,31E-02 | 2,40E-01 |
| <i>C11orf58</i>        | 1,06  | 6,31E-02 | 2,41E-01 |
| <i>ENST00000341865</i> | 1,28  | 6,31E-02 | 2,41E-01 |
| <i>C8orf31</i>         | -1,07 | 6,32E-02 | 2,41E-01 |
| <i>MED10</i>           | 1,08  | 6,32E-02 | 2,41E-01 |
| <i>SYT12</i>           | 1,20  | 6,32E-02 | 2,41E-01 |
| <i>NYD-SP21</i>        | -1,13 | 6,32E-02 | 2,41E-01 |
| <i>HUWE1</i>           | 1,06  | 6,32E-02 | 2,41E-01 |
| <i>AK057071</i>        | 1,11  | 6,32E-02 | 2,41E-01 |
| <i>CLEC4A</i>          | -1,13 | 6,32E-02 | 2,41E-01 |
| <i>AMMECR1</i>         | -1,07 | 6,33E-02 | 2,41E-01 |
| <i>THC2341675</i>      | -1,07 | 6,33E-02 | 2,41E-01 |
| <i>KIAA1324</i>        | -1,07 | 6,33E-02 | 2,41E-01 |
| <i>THC2407751</i>      | -1,11 | 6,33E-02 | 2,41E-01 |
| <i>RRAD</i>            | 1,23  | 6,33E-02 | 2,41E-01 |
| <i>BG429688</i>        | -1,08 | 6,33E-02 | 2,41E-01 |
| <i>GBA</i>             | 1,09  | 6,33E-02 | 2,41E-01 |
| <i>RERG</i>            | -1,18 | 6,34E-02 | 2,41E-01 |
| <i>C17orf83</i>        | 1,05  | 6,34E-02 | 2,41E-01 |
| <i>LOC122258</i>       | 1,08  | 6,34E-02 | 2,41E-01 |
| <i>DA237404</i>        | 1,10  | 6,34E-02 | 2,41E-01 |
| <i>THOC6</i>           | 1,07  | 6,35E-02 | 2,41E-01 |
| <i>SHOX</i>            | 1,09  | 6,35E-02 | 2,41E-01 |
| <i>ZNF592</i>          | -1,07 | 6,36E-02 | 2,42E-01 |
| <i>CBLN1</i>           | 1,17  | 6,36E-02 | 2,42E-01 |
| <i>BF939304</i>        | -1,07 | 6,36E-02 | 2,42E-01 |
| <i>AA665072</i>        | 1,14  | 6,36E-02 | 2,42E-01 |
| <i>ETV4</i>            | 1,06  | 6,36E-02 | 2,42E-01 |
| <i>FLJ34870</i>        | 1,17  | 6,37E-02 | 2,42E-01 |
| <i>MIPOL1</i>          | 1,07  | 6,37E-02 | 2,42E-01 |
| <i>ENST00000223618</i> | 1,10  | 6,37E-02 | 2,42E-01 |

|                        |       |          |          |
|------------------------|-------|----------|----------|
| <i>BOC</i>             | -1,17 | 6,37E-02 | 2,42E-01 |
| <i>THC2350968</i>      | 1,06  | 6,37E-02 | 2,42E-01 |
| <i>SLAMF8</i>          | -1,20 | 6,38E-02 | 2,42E-01 |
| <i>AK021785</i>        | 1,13  | 6,38E-02 | 2,42E-01 |
| <i>MYST4</i>           | 1,08  | 6,38E-02 | 2,42E-01 |
| <i>CR602702</i>        | 1,07  | 6,38E-02 | 2,42E-01 |
| <i>A_24_P916464</i>    | -1,13 | 6,38E-02 | 2,42E-01 |
| <i>THC2315653</i>      | 1,11  | 6,38E-02 | 2,42E-01 |
| <i>SLC25A10</i>        | -1,07 | 6,39E-02 | 2,42E-01 |
| <i>ARS2</i>            | -1,06 | 6,39E-02 | 2,42E-01 |
| <i>UNQ2446</i>         | -1,10 | 6,39E-02 | 2,42E-01 |
| <i>AW029229</i>        | -1,08 | 6,39E-02 | 2,42E-01 |
| <i>RNASE2</i>          | -1,13 | 6,39E-02 | 2,42E-01 |
| <i>TSHB</i>            | 1,08  | 6,39E-02 | 2,42E-01 |
| <i>EIF2S1</i>          | 1,07  | 6,39E-02 | 2,42E-01 |
| <i>BE007076</i>        | -1,11 | 6,40E-02 | 2,42E-01 |
| <i>THC2308747</i>      | 1,09  | 6,40E-02 | 2,42E-01 |
| <i>NOTCH3</i>          | 1,11  | 6,40E-02 | 2,42E-01 |
| <i>TRPC4</i>           | 1,22  | 6,40E-02 | 2,42E-01 |
| <i>A_24_P499481</i>    | 1,10  | 6,40E-02 | 2,42E-01 |
| <i>CD151</i>           | 1,12  | 6,40E-02 | 2,42E-01 |
| <i>A_32_P71864</i>     | 1,06  | 6,41E-02 | 2,43E-01 |
| <i>LOC649542</i>       | 1,14  | 6,41E-02 | 2,43E-01 |
| <i>AK098422</i>        | -1,11 | 6,41E-02 | 2,43E-01 |
| <i>BC002350</i>        | 1,07  | 6,41E-02 | 2,43E-01 |
| <i>FLJ23861</i>        | -1,07 | 6,42E-02 | 2,43E-01 |
| <i>ENST00000380295</i> | 1,06  | 6,42E-02 | 2,43E-01 |
| <i>AJ243810</i>        | 1,08  | 6,42E-02 | 2,43E-01 |
| <i>CASKIN1</i>         | 1,07  | 6,42E-02 | 2,43E-01 |
| <i>HPCAL1</i>          | -1,14 | 6,42E-02 | 2,43E-01 |
| <i>PHYHD1</i>          | -1,09 | 6,42E-02 | 2,43E-01 |
| <i>NDUFS5</i>          | 1,09  | 6,42E-02 | 2,43E-01 |
| <i>FAM50B</i>          | -1,12 | 6,43E-02 | 2,43E-01 |
| <i>LOC144363</i>       | 1,08  | 6,43E-02 | 2,43E-01 |
| <i>LOC648556</i>       | -1,07 | 6,43E-02 | 2,43E-01 |
| <i>MYST1</i>           | -1,07 | 6,43E-02 | 2,43E-01 |
| <i>THC2425852</i>      | 1,07  | 6,43E-02 | 2,43E-01 |
| <i>PPP1R13B</i>        | 1,10  | 6,44E-02 | 2,43E-01 |
| <i>THC2406165</i>      | -1,10 | 6,44E-02 | 2,43E-01 |
| <i>THC2437744</i>      | 1,06  | 6,44E-02 | 2,43E-01 |
| <i>C6orf60</i>         | 1,13  | 6,44E-02 | 2,43E-01 |
| <i>BE714307</i>        | 1,14  | 6,44E-02 | 2,43E-01 |
| <i>TUBA2</i>           | -1,12 | 6,45E-02 | 2,43E-01 |
| <i>COPB2</i>           | -1,10 | 6,45E-02 | 2,43E-01 |

|                     |       |          |          |
|---------------------|-------|----------|----------|
| <i>A_24_P144383</i> | -1,07 | 6,45E-02 | 2,43E-01 |
| <i>LOC145757</i>    | -1,12 | 6,45E-02 | 2,44E-01 |
| <i>SFRS5</i>        | 1,09  | 6,45E-02 | 2,44E-01 |
| <i>DPH2</i>         | -1,08 | 6,46E-02 | 2,44E-01 |
| <i>ZNF682</i>       | -1,07 | 6,46E-02 | 2,44E-01 |
| <i>MOCOS</i>        | 1,08  | 6,46E-02 | 2,44E-01 |
| <i>THC2372472</i>   | 1,12  | 6,46E-02 | 2,44E-01 |
| <i>Z39851</i>       | 1,09  | 6,46E-02 | 2,44E-01 |
| <i>SDSL</i>         | 1,17  | 6,46E-02 | 2,44E-01 |
| <i>RASSF8</i>       | 1,13  | 6,46E-02 | 2,44E-01 |
| <i>AK026675</i>     | -1,09 | 6,47E-02 | 2,44E-01 |
| <i>39326</i>        | 1,07  | 6,47E-02 | 2,44E-01 |
| <i>RPL9</i>         | -1,06 | 6,48E-02 | 2,44E-01 |
| <i>FLJ37549</i>     | -1,09 | 6,48E-02 | 2,44E-01 |
| <i>LOC642517</i>    | -1,09 | 6,48E-02 | 2,44E-01 |
| <i>LOC439938</i>    | -1,09 | 6,48E-02 | 2,44E-01 |
| <i>KCNA4</i>        | 1,15  | 6,48E-02 | 2,44E-01 |
| <i>IPO11</i>        | 1,09  | 6,48E-02 | 2,44E-01 |
| <i>A_24_P913961</i> | 1,09  | 6,49E-02 | 2,44E-01 |
| <i>HLA-DMA</i>      | -1,10 | 6,49E-02 | 2,44E-01 |
| <i>BC013657</i>     | 1,11  | 6,49E-02 | 2,44E-01 |
| <i>DAAM1</i>        | 1,12  | 6,49E-02 | 2,44E-01 |
| <i>THC2378668</i>   | -1,08 | 6,49E-02 | 2,44E-01 |
| <i>STX12</i>        | 1,08  | 6,50E-02 | 2,45E-01 |
| <i>NPHP3</i>        | -1,10 | 6,50E-02 | 2,45E-01 |
| <i>HEL308</i>       | -1,07 | 6,50E-02 | 2,45E-01 |
| <i>CBX4</i>         | 1,08  | 6,50E-02 | 2,45E-01 |
| <i>TFAP2B</i>       | 1,18  | 6,50E-02 | 2,45E-01 |
| <i>BE218249</i>     | -1,10 | 6,50E-02 | 2,45E-01 |
| <i>LRFN2</i>        | 1,07  | 6,50E-02 | 2,45E-01 |
| <i>CR601641</i>     | -1,08 | 6,51E-02 | 2,45E-01 |
| <i>ALDOAP2</i>      | 1,12  | 6,52E-02 | 2,45E-01 |
| <i>CN304251</i>     | 1,09  | 6,52E-02 | 2,45E-01 |
| <i>AI608782</i>     | 1,13  | 6,52E-02 | 2,45E-01 |
| <i>MAGEB3</i>       | 1,07  | 6,52E-02 | 2,45E-01 |
| <i>A_23_P87684</i>  | 1,07  | 6,52E-02 | 2,45E-01 |
| <i>AK022390</i>     | -1,14 | 6,52E-02 | 2,45E-01 |
| <i>AK096566</i>     | 1,10  | 6,52E-02 | 2,45E-01 |
| <i>PKN3</i>         | 1,11  | 6,52E-02 | 2,45E-01 |
| <i>ANKRD11</i>      | -1,07 | 6,53E-02 | 2,45E-01 |
| <i>A_24_P611965</i> | -1,08 | 6,53E-02 | 2,46E-01 |
| <i>DLX3</i>         | 1,06  | 6,54E-02 | 2,46E-01 |
| <i>HECA</i>         | 1,13  | 6,54E-02 | 2,46E-01 |
| <i>BPNT1</i>        | 1,08  | 6,54E-02 | 2,46E-01 |

|                        |       |          |          |
|------------------------|-------|----------|----------|
| <i>PIAS4</i>           | 1,08  | 6,54E-02 | 2,46E-01 |
| <i>ZNF574</i>          | -1,08 | 6,55E-02 | 2,46E-01 |
| <i>SLC32A1</i>         | 1,07  | 6,55E-02 | 2,46E-01 |
| <i>FHL5</i>            | 1,26  | 6,55E-02 | 2,46E-01 |
| <i>KIAA1715</i>        | 1,08  | 6,55E-02 | 2,46E-01 |
| <i>RASGRP2</i>         | 1,15  | 6,55E-02 | 2,46E-01 |
| <i>A_32_P122595</i>    | 1,13  | 6,55E-02 | 2,46E-01 |
| <i>ADCY5</i>           | 1,20  | 6,56E-02 | 2,46E-01 |
| <i>C14orf118</i>       | -1,09 | 6,56E-02 | 2,46E-01 |
| <i>SOS1</i>            | 1,06  | 6,56E-02 | 2,46E-01 |
| <i>HERC4</i>           | -1,06 | 6,56E-02 | 2,46E-01 |
| <i>ZNF687</i>          | -1,07 | 6,56E-02 | 2,46E-01 |
| <i>C1orf181</i>        | -1,06 | 6,56E-02 | 2,46E-01 |
| <i>SH2D5</i>           | 1,15  | 6,56E-02 | 2,46E-01 |
| <i>ENST00000338205</i> | -1,11 | 6,57E-02 | 2,46E-01 |
| <i>SPSB1</i>           | 1,19  | 6,57E-02 | 2,46E-01 |
| <i>LOC132321</i>       | 1,10  | 6,57E-02 | 2,46E-01 |
| <i>AF333762</i>        | 1,05  | 6,58E-02 | 2,46E-01 |
| <i>BCAS3</i>           | 1,08  | 6,58E-02 | 2,46E-01 |
| <i>AK022843</i>        | -1,12 | 6,58E-02 | 2,47E-01 |
| <i>FLJ22746</i>        | -1,18 | 6,59E-02 | 2,47E-01 |
| <i>THC2345534</i>      | -1,10 | 6,59E-02 | 2,47E-01 |
| <i>RPL10A</i>          | -1,09 | 6,59E-02 | 2,47E-01 |
| <i>RIT1</i>            | 1,07  | 6,59E-02 | 2,47E-01 |
| <i>C15orf20</i>        | -1,10 | 6,59E-02 | 2,47E-01 |
| <i>THC2315140</i>      | -1,08 | 6,59E-02 | 2,47E-01 |
| <i>ZNF181</i>          | -1,10 | 6,60E-02 | 2,47E-01 |
| <i>KIF19</i>           | -1,08 | 6,60E-02 | 2,47E-01 |
| <i>PPM2C</i>           | 1,11  | 6,60E-02 | 2,47E-01 |
| <i>ENST00000303868</i> | 1,06  | 6,60E-02 | 2,47E-01 |
| <i>VAR5</i>            | 1,09  | 6,60E-02 | 2,47E-01 |
| <i>AA873311</i>        | 1,11  | 6,61E-02 | 2,47E-01 |
| <i>A_32_P44699</i>     | -1,11 | 6,61E-02 | 2,47E-01 |
| <i>PCNA</i>            | -1,08 | 6,61E-02 | 2,47E-01 |
| <i>MAP3K7IP1</i>       | -1,07 | 6,61E-02 | 2,47E-01 |
| <i>SYNE1</i>           | 1,09  | 6,61E-02 | 2,47E-01 |
| <i>ENST00000366847</i> | -1,10 | 6,61E-02 | 2,47E-01 |
| <i>ENST00000327721</i> | -1,15 | 6,62E-02 | 2,48E-01 |
| <i>THC2366678</i>      | -1,11 | 6,62E-02 | 2,48E-01 |
| <i>SLFN5</i>           | 1,15  | 6,62E-02 | 2,48E-01 |
| <i>C21orf7</i>         | 1,13  | 6,62E-02 | 2,48E-01 |
| <i>MGC35030</i>        | -1,07 | 6,63E-02 | 2,48E-01 |
| <i>ZNF117</i>          | -1,13 | 6,63E-02 | 2,48E-01 |
| <i>THC2336533</i>      | -1,18 | 6,63E-02 | 2,48E-01 |

|                        |       |          |          |
|------------------------|-------|----------|----------|
| <i>MUC19</i>           | -1,05 | 6,63E-02 | 2,48E-01 |
| <i>U04815</i>          | 1,07  | 6,63E-02 | 2,48E-01 |
| <i>THC2443836</i>      | -1,16 | 6,64E-02 | 2,48E-01 |
| <i>WDR67</i>           | -1,07 | 6,64E-02 | 2,48E-01 |
| <i>GMCL1L</i>          | -1,07 | 6,64E-02 | 2,48E-01 |
| <i>A_24_P110591</i>    | 1,11  | 6,64E-02 | 2,48E-01 |
| <i>DCXR</i>            | -1,15 | 6,64E-02 | 2,48E-01 |
| <i>ENST00000307201</i> | -1,07 | 6,64E-02 | 2,48E-01 |
| <i>CORO1C</i>          | 1,15  | 6,64E-02 | 2,48E-01 |
| <i>THC2373245</i>      | -1,08 | 6,64E-02 | 2,48E-01 |
| <i>A_24_P932253</i>    | 1,08  | 6,65E-02 | 2,48E-01 |
| <i>CLDN18</i>          | 1,07  | 6,65E-02 | 2,48E-01 |
| <i>LOC283677</i>       | 1,07  | 6,65E-02 | 2,48E-01 |
| <i>THC2438003</i>      | -1,11 | 6,66E-02 | 2,48E-01 |
| <i>B3GNT1</i>          | -1,09 | 6,66E-02 | 2,48E-01 |
| <i>A_24_P367199</i>    | -1,08 | 6,66E-02 | 2,48E-01 |
| <i>PAK4</i>            | 1,06  | 6,66E-02 | 2,48E-01 |
| <i>BAG5</i>            | 1,07  | 6,66E-02 | 2,48E-01 |
| <i>FLOT1</i>           | 1,07  | 6,66E-02 | 2,48E-01 |
| <i>SNRPC</i>           | -1,07 | 6,66E-02 | 2,48E-01 |
| <i>TRIM23</i>          | -1,08 | 6,67E-02 | 2,48E-01 |
| <i>TAS2R45</i>         | -1,10 | 6,67E-02 | 2,48E-01 |
| <i>CR597075</i>        | 1,12  | 6,67E-02 | 2,48E-01 |
| <i>ADAMTS8</i>         | 1,29  | 6,67E-02 | 2,48E-01 |
| <i>RP5-821D11.2</i>    | -1,15 | 6,67E-02 | 2,49E-01 |
| <i>RAD51C</i>          | 1,06  | 6,67E-02 | 2,49E-01 |
| <i>STAT4</i>           | -1,08 | 6,68E-02 | 2,49E-01 |
| <i>UGT8</i>            | -1,34 | 6,69E-02 | 2,49E-01 |
| <i>A_32_P23096</i>     | -1,10 | 6,69E-02 | 2,49E-01 |
| <i>KRT7</i>            | 1,15  | 6,69E-02 | 2,49E-01 |
| <i>GFPT1</i>           | 1,09  | 6,69E-02 | 2,49E-01 |
| <i>CA429641</i>        | 1,08  | 6,69E-02 | 2,49E-01 |
| <i>OR52K2</i>          | -1,07 | 6,70E-02 | 2,49E-01 |
| <i>FHIT</i>            | 1,07  | 6,70E-02 | 2,49E-01 |
| <i>A_24_P152793</i>    | 1,11  | 6,70E-02 | 2,49E-01 |
| <i>A_24_P771278</i>    | 1,12  | 6,70E-02 | 2,49E-01 |
| <i>ENST00000331406</i> | 1,07  | 6,70E-02 | 2,49E-01 |
| <i>THC2281732</i>      | 1,11  | 6,70E-02 | 2,49E-01 |
| <i>PRKD3</i>           | -1,06 | 6,70E-02 | 2,49E-01 |
| <i>THC2380698</i>      | -1,13 | 6,70E-02 | 2,49E-01 |
| <i>FTO</i>             | -1,07 | 6,71E-02 | 2,49E-01 |
| <i>SEMA3G</i>          | 1,27  | 6,71E-02 | 2,49E-01 |
| <i>BQ188373</i>        | -1,07 | 6,71E-02 | 2,49E-01 |
| <i>CR614803</i>        | 1,07  | 6,71E-02 | 2,49E-01 |

|                        |       |          |          |
|------------------------|-------|----------|----------|
| <i>EXOC3</i>           | 1,08  | 6,71E-02 | 2,49E-01 |
| <i>A_32_P89646</i>     | -1,05 | 6,71E-02 | 2,49E-01 |
| <i>RSF1</i>            | 1,06  | 6,71E-02 | 2,49E-01 |
| <i>CYorf16</i>         | 1,07  | 6,71E-02 | 2,49E-01 |
| <i>TMEM32</i>          | 1,09  | 6,71E-02 | 2,49E-01 |
| <i>HCG27</i>           | -1,13 | 6,72E-02 | 2,50E-01 |
| <i>FEZ1</i>            | 1,07  | 6,72E-02 | 2,50E-01 |
| <i>M78162</i>          | -1,07 | 6,73E-02 | 2,50E-01 |
| <i>A_32_P176344</i>    | 1,10  | 6,73E-02 | 2,50E-01 |
| <i>THC2306065</i>      | -1,10 | 6,73E-02 | 2,50E-01 |
| <i>ENST00000355520</i> | -1,09 | 6,74E-02 | 2,50E-01 |
| <i>PTPN6</i>           | -1,10 | 6,74E-02 | 2,50E-01 |
| <i>C14orf167</i>       | -1,12 | 6,74E-02 | 2,50E-01 |
| <i>HIP2</i>            | 1,06  | 6,74E-02 | 2,50E-01 |
| <i>THC2253104</i>      | -1,06 | 6,74E-02 | 2,50E-01 |
| <i>A_24_P136299</i>    | 1,06  | 6,75E-02 | 2,50E-01 |
| <i>THC2364779</i>      | 1,07  | 6,75E-02 | 2,50E-01 |
| <i>CHES1</i>           | 1,10  | 6,75E-02 | 2,50E-01 |
| <i>ACSM1</i>           | -1,17 | 6,75E-02 | 2,50E-01 |
| <i>AK021824</i>        | 1,09  | 6,75E-02 | 2,50E-01 |
| <i>PARD6B</i>          | -1,20 | 6,75E-02 | 2,50E-01 |
| <i>CENTA2</i>          | -1,15 | 6,75E-02 | 2,50E-01 |
| <i>MGC42174</i>        | 1,06  | 6,75E-02 | 2,50E-01 |
| <i>ENST00000330640</i> | 1,13  | 6,75E-02 | 2,50E-01 |
| <i>MGC42090</i>        | -1,17 | 6,76E-02 | 2,50E-01 |
| <i>THC2382622</i>      | 1,07  | 6,76E-02 | 2,50E-01 |
| <i>CANX</i>            | -1,09 | 6,76E-02 | 2,50E-01 |
| <i>FLJ36874</i>        | -1,06 | 6,76E-02 | 2,50E-01 |
| <i>RPS8</i>            | -1,14 | 6,76E-02 | 2,51E-01 |
| <i>LOC63929</i>        | -1,08 | 6,77E-02 | 2,51E-01 |
| <i>LAT2</i>            | -1,14 | 6,77E-02 | 2,51E-01 |
| <i>THC2372273</i>      | 1,08  | 6,77E-02 | 2,51E-01 |
| <i>ECSM2</i>           | 1,14  | 6,77E-02 | 2,51E-01 |
| <i>POU4F1</i>          | 1,06  | 6,78E-02 | 2,51E-01 |
| <i>RABIF</i>           | 1,06  | 6,78E-02 | 2,51E-01 |
| <i>ENST00000266712</i> | -1,06 | 6,78E-02 | 2,51E-01 |
| <i>ALPP</i>            | 1,06  | 6,78E-02 | 2,51E-01 |
| <i>FOXQ1</i>           | 1,06  | 6,78E-02 | 2,51E-01 |
| <i>C9orf9</i>          | -1,12 | 6,78E-02 | 2,51E-01 |
| <i>TAS2R3</i>          | -1,06 | 6,79E-02 | 2,51E-01 |
| <i>NY-SAR-48</i>       | 1,08  | 6,79E-02 | 2,51E-01 |
| <i>TAF9</i>            | 1,05  | 6,79E-02 | 2,51E-01 |
| <i>FLJ10803</i>        | 1,07  | 6,80E-02 | 2,51E-01 |
| <i>A_24_P323885</i>    | 1,08  | 6,80E-02 | 2,51E-01 |



|                        |       |          |          |
|------------------------|-------|----------|----------|
| <i>ENST00000374465</i> | 1,15  | 6,80E-02 | 2,51E-01 |
| <i>PTGES2</i>          | 1,08  | 6,80E-02 | 2,51E-01 |
| <i>LOC56964</i>        | 1,09  | 6,81E-02 | 2,52E-01 |
| <i>ENST00000312946</i> | -1,64 | 6,81E-02 | 2,52E-01 |
| <i>TMEM62</i>          | 1,08  | 6,81E-02 | 2,52E-01 |
| <i>A_32_P41080</i>     | 1,12  | 6,81E-02 | 2,52E-01 |
| <i>DEDD</i>            | 1,07  | 6,81E-02 | 2,52E-01 |
| <i>SLC2A11</i>         | -1,11 | 6,82E-02 | 2,52E-01 |
| <i>A_24_P340941</i>    | -1,08 | 6,82E-02 | 2,52E-01 |
| <i>INOC1</i>           | -1,06 | 6,82E-02 | 2,52E-01 |
| <i>FLJ22763</i>        | 1,05  | 6,82E-02 | 2,52E-01 |
| <i>A_24_P926875</i>    | 1,11  | 6,82E-02 | 2,52E-01 |
| <i>ST18</i>            | 1,14  | 6,82E-02 | 2,52E-01 |
| <i>A_24_P911837</i>    | -1,07 | 6,82E-02 | 2,52E-01 |
| <i>PSMC3IP</i>         | -1,07 | 6,83E-02 | 2,52E-01 |
| <i>LOC348840</i>       | 1,06  | 6,83E-02 | 2,52E-01 |
| <i>CST7</i>            | -1,15 | 6,83E-02 | 2,52E-01 |
| <i>HPGD</i>            | -1,25 | 6,83E-02 | 2,52E-01 |
| <i>A_23_P972</i>       | 1,08  | 6,84E-02 | 2,52E-01 |
| <i>HIST1H3B</i>        | 1,10  | 6,83E-02 | 2,52E-01 |
| <i>TUFT1</i>           | 1,24  | 6,83E-02 | 2,52E-01 |
| <i>PEX5L</i>           | 1,24  | 6,83E-02 | 2,52E-01 |
| <i>GPM6A</i>           | -1,25 | 6,84E-02 | 2,52E-01 |
| <i>COMMD3</i>          | -1,06 | 6,84E-02 | 2,52E-01 |
| <i>A_24_P174353</i>    | 1,33  | 6,84E-02 | 2,52E-01 |
| <i>NMB</i>             | -1,11 | 6,84E-02 | 2,52E-01 |
| <i>BM955917</i>        | 1,09  | 6,85E-02 | 2,52E-01 |
| <i>POP7</i>            | -1,09 | 6,85E-02 | 2,52E-01 |
| <i>THC2311196</i>      | -1,08 | 6,85E-02 | 2,52E-01 |
| <i>THC2275804</i>      | -1,06 | 6,85E-02 | 2,52E-01 |
| <i>THC2269172</i>      | 1,12  | 6,85E-02 | 2,52E-01 |
| <i>SFRS11</i>          | -1,10 | 6,85E-02 | 2,52E-01 |
| <i>CACNA1S</i>         | 1,08  | 6,85E-02 | 2,52E-01 |
| <i>FLJ37440</i>        | 1,13  | 6,85E-02 | 2,52E-01 |
| <i>PRR14</i>           | -1,06 | 6,86E-02 | 2,53E-01 |
| <i>TCAP</i>            | -1,09 | 6,86E-02 | 2,53E-01 |
| <i>LEPR</i>            | -1,19 | 6,87E-02 | 2,53E-01 |
| <i>FLJ13305</i>        | -1,10 | 6,87E-02 | 2,53E-01 |
| <i>ENST00000381956</i> | -1,09 | 6,87E-02 | 2,53E-01 |
| <i>MGA</i>             | -1,06 | 6,87E-02 | 2,53E-01 |
| <i>ENST00000334720</i> | 1,06  | 6,87E-02 | 2,53E-01 |
| <i>A_24_P307104</i>    | 1,07  | 6,87E-02 | 2,53E-01 |
| <i>THC2337176</i>      | 1,16  | 6,87E-02 | 2,53E-01 |
| <i>CR610892</i>        | 1,10  | 6,87E-02 | 2,53E-01 |

|                        |       |          |          |
|------------------------|-------|----------|----------|
| <i>EME1</i>            | -1,06 | 6,88E-02 | 2,53E-01 |
| <i>AK022038</i>        | 1,14  | 6,88E-02 | 2,53E-01 |
| <i>CDC23</i>           | -1,08 | 6,88E-02 | 2,53E-01 |
| <i>RPS23</i>           | -1,06 | 6,88E-02 | 2,53E-01 |
| <i>KLHL18</i>          | 1,06  | 6,88E-02 | 2,53E-01 |
| <i>UBAP2</i>           | -1,07 | 6,89E-02 | 2,53E-01 |
| <i>C10orf56</i>        | -1,09 | 6,89E-02 | 2,53E-01 |
| <i>AK125173</i>        | -1,09 | 6,89E-02 | 2,53E-01 |
| <i>HRK</i>             | 1,07  | 6,89E-02 | 2,53E-01 |
| <i>THC2403712</i>      | -1,17 | 6,90E-02 | 2,53E-01 |
| <i>KLRC2</i>           | -1,12 | 6,90E-02 | 2,53E-01 |
| <i>BC015772</i>        | 1,07  | 6,89E-02 | 2,53E-01 |
| <i>A_24_P480722</i>    | 1,08  | 6,89E-02 | 2,53E-01 |
| <i>ENST00000369123</i> | 1,08  | 6,89E-02 | 2,53E-01 |
| <i>KTN1</i>            | 1,09  | 6,89E-02 | 2,53E-01 |
| <i>DKFZp666G057</i>    | -1,11 | 6,90E-02 | 2,53E-01 |
| <i>HDAC1</i>           | -1,07 | 6,90E-02 | 2,53E-01 |
| <i>LMNB2</i>           | -1,12 | 6,91E-02 | 2,53E-01 |
| <i>STK11</i>           | 1,05  | 6,91E-02 | 2,53E-01 |
| <i>THC2334717</i>      | 1,06  | 6,91E-02 | 2,53E-01 |
| <i>BF593129</i>        | 1,08  | 6,91E-02 | 2,53E-01 |
| <i>A_32_P721983</i>    | 1,08  | 6,91E-02 | 2,53E-01 |
| <i>A_24_P332754</i>    | 1,09  | 6,91E-02 | 2,53E-01 |
| <i>EXOC6</i>           | 1,12  | 6,91E-02 | 2,53E-01 |
| <i>AK027315</i>        | 1,19  | 6,91E-02 | 2,53E-01 |
| <i>IL13</i>            | 1,21  | 6,91E-02 | 2,53E-01 |
| <i>C1QTNF7</i>         | 1,29  | 6,91E-02 | 2,53E-01 |
| <i>SH3MD4</i>          | 1,10  | 6,92E-02 | 2,54E-01 |
| <i>BM714744</i>        | -1,10 | 6,92E-02 | 2,54E-01 |
| <i>ENST00000277491</i> | 1,11  | 6,92E-02 | 2,54E-01 |
| <i>AL832758</i>        | -1,09 | 6,92E-02 | 2,54E-01 |
| <i>A_24_P349869</i>    | 1,15  | 6,92E-02 | 2,54E-01 |
| <i>THC2401542</i>      | 1,21  | 6,93E-02 | 2,54E-01 |
| <i>ZNF25</i>           | -1,10 | 6,93E-02 | 2,54E-01 |
| <i>FLJ33706</i>        | -1,07 | 6,93E-02 | 2,54E-01 |
| <i>BAX</i>             | 1,08  | 6,93E-02 | 2,54E-01 |
| <i>NLGN4X</i>          | 1,10  | 6,93E-02 | 2,54E-01 |
| <i>GIT1</i>            | 1,04  | 6,93E-02 | 2,54E-01 |
| <i>AI674800</i>        | -1,06 | 6,93E-02 | 2,54E-01 |
| <i>DYDC2</i>           | -1,08 | 6,94E-02 | 2,54E-01 |
| <i>PSG7</i>            | 1,07  | 6,94E-02 | 2,54E-01 |
| <i>THC2377651</i>      | 1,07  | 6,94E-02 | 2,54E-01 |
| <i>EEF1A1</i>          | -1,09 | 6,94E-02 | 2,54E-01 |
| <i>THRAP2</i>          | 1,11  | 6,94E-02 | 2,54E-01 |

|                     |       |          |          |
|---------------------|-------|----------|----------|
| <i>AL137342</i>     | -1,38 | 6,95E-02 | 2,54E-01 |
| <i>AF116705</i>     | 1,09  | 6,95E-02 | 2,54E-01 |
| <i>FLJ25410</i>     | -1,06 | 6,96E-02 | 2,54E-01 |
| <i>AA576497</i>     | 1,07  | 6,96E-02 | 2,54E-01 |
| <i>SFTPD</i>        | 1,18  | 6,96E-02 | 2,54E-01 |
| <i>PILRB</i>        | -1,12 | 6,96E-02 | 2,55E-01 |
| <i>ABCA10</i>       | -1,09 | 6,96E-02 | 2,55E-01 |
| <i>FBXO6</i>        | -1,08 | 6,96E-02 | 2,55E-01 |
| <i>MATN1</i>        | -1,05 | 6,96E-02 | 2,55E-01 |
| <i>ITPKB</i>        | -1,16 | 6,97E-02 | 2,55E-01 |
| <i>SERINC2</i>      | 1,08  | 6,97E-02 | 2,55E-01 |
| <i>FLJ31438</i>     | -1,11 | 6,98E-02 | 2,55E-01 |
| <i>MRPL44</i>       | -1,08 | 6,98E-02 | 2,55E-01 |
| <i>D31828</i>       | 1,07  | 6,98E-02 | 2,55E-01 |
| <i>THC2333591</i>   | 1,06  | 6,98E-02 | 2,55E-01 |
| <i>EIF4E3</i>       | 1,07  | 6,99E-02 | 2,55E-01 |
| <i>THC2341283</i>   | -1,08 | 7,00E-02 | 2,56E-01 |
| <i>A_24_P392436</i> | -1,07 | 7,00E-02 | 2,56E-01 |
| <i>C1orf151</i>     | 1,08  | 7,00E-02 | 2,56E-01 |
| <i>CDKL2</i>        | -1,25 | 7,01E-02 | 2,56E-01 |
| <i>PSMD5</i>        | -1,07 | 7,01E-02 | 2,56E-01 |
| <i>RPS19</i>        | -1,06 | 7,01E-02 | 2,56E-01 |
| <i>AF124170</i>     | -1,11 | 7,01E-02 | 2,56E-01 |
| <i>A_24_P374984</i> | 1,05  | 7,01E-02 | 2,56E-01 |
| <i>THC2422705</i>   | 1,07  | 7,01E-02 | 2,56E-01 |
| <i>AQP11</i>        | -1,08 | 7,02E-02 | 2,56E-01 |
| <i>CC2D1A</i>       | 1,07  | 7,02E-02 | 2,56E-01 |
| <i>DMGDH</i>        | -1,08 | 7,02E-02 | 2,56E-01 |
| <i>AF117899</i>     | 1,06  | 7,02E-02 | 2,56E-01 |
| <i>A_24_P367360</i> | -1,06 | 7,03E-02 | 2,56E-01 |
| <i>ZBTB32</i>       | -1,11 | 7,03E-02 | 2,56E-01 |
| <i>BC027347</i>     | -1,09 | 7,03E-02 | 2,56E-01 |
| <i>THC2317830</i>   | -1,08 | 7,03E-02 | 2,56E-01 |
| <i>OXNAD1</i>       | -1,05 | 7,03E-02 | 2,56E-01 |
| <i>HOXC10</i>       | 1,06  | 7,04E-02 | 2,56E-01 |
| <i>NARG1</i>        | 1,07  | 7,04E-02 | 2,56E-01 |
| <i>BLZF1</i>        | 1,07  | 7,04E-02 | 2,56E-01 |
| <i>CD40LG</i>       | -1,07 | 7,04E-02 | 2,57E-01 |
| <i>TPI1</i>         | 1,07  | 7,04E-02 | 2,57E-01 |
| <i>VSIG2</i>        | 1,07  | 7,05E-02 | 2,57E-01 |
| <i>AF070579</i>     | -1,08 | 7,05E-02 | 2,57E-01 |
| <i>THC2408235</i>   | -1,08 | 7,05E-02 | 2,57E-01 |
| <i>HAND1</i>        | 1,06  | 7,06E-02 | 2,57E-01 |
| <i>TTL11</i>        | 1,09  | 7,06E-02 | 2,57E-01 |

|                        |       |          |          |
|------------------------|-------|----------|----------|
| <i>MUSTN1</i>          | 1,28  | 7,06E-02 | 2,57E-01 |
| <i>CUL5</i>            | -1,06 | 7,06E-02 | 2,57E-01 |
| <i>BAALC</i>           | 1,06  | 7,06E-02 | 2,57E-01 |
| <i>OSBPL8</i>          | 1,11  | 7,06E-02 | 2,57E-01 |
| <i>PRDM11</i>          | -1,07 | 7,07E-02 | 2,57E-01 |
| <i>THC2318873</i>      | -1,06 | 7,07E-02 | 2,57E-01 |
| <i>A_24_P187539</i>    | 1,04  | 7,07E-02 | 2,57E-01 |
| <i>A_24_P93462</i>     | 1,10  | 7,07E-02 | 2,57E-01 |
| <i>C1orf118</i>        | 1,12  | 7,07E-02 | 2,57E-01 |
| <i>POMT1</i>           | -1,06 | 7,08E-02 | 2,57E-01 |
| <i>A_32_P212141</i>    | 1,08  | 7,08E-02 | 2,57E-01 |
| <i>A_24_P923449</i>    | -1,07 | 7,08E-02 | 2,57E-01 |
| <i>A_24_P186354</i>    | 1,09  | 7,08E-02 | 2,57E-01 |
| <i>GPR62</i>           | -1,07 | 7,09E-02 | 2,58E-01 |
| <i>SLC22A15</i>        | 1,14  | 7,09E-02 | 2,58E-01 |
| <i>KIAA1394</i>        | 1,15  | 7,09E-02 | 2,58E-01 |
| <i>AK092468</i>        | -1,13 | 7,09E-02 | 2,58E-01 |
| <i>SCYL2</i>           | 1,05  | 7,09E-02 | 2,58E-01 |
| <i>PTGFRN</i>          | 1,11  | 7,09E-02 | 2,58E-01 |
| <i>NBR2</i>            | -1,09 | 7,10E-02 | 2,58E-01 |
| <i>HIST2H2AA3</i>      | 1,14  | 7,10E-02 | 2,58E-01 |
| <i>A_24_P937796</i>    | -1,07 | 7,11E-02 | 2,58E-01 |
| <i>AL080233</i>        | 1,07  | 7,11E-02 | 2,58E-01 |
| <i>TGM5</i>            | 1,08  | 7,11E-02 | 2,58E-01 |
| <i>CXCR6</i>           | -1,14 | 7,11E-02 | 2,58E-01 |
| <i>BX375060</i>        | 1,08  | 7,12E-02 | 2,58E-01 |
| <i>AI719574</i>        | -1,08 | 7,12E-02 | 2,58E-01 |
| <i>SMARCD2</i>         | -1,06 | 7,12E-02 | 2,58E-01 |
| <i>POU5F1</i>          | -1,06 | 7,13E-02 | 2,59E-01 |
| <i>EIF2C4</i>          | 1,09  | 7,13E-02 | 2,59E-01 |
| <i>BX110985</i>        | -1,14 | 7,14E-02 | 2,59E-01 |
| <i>DYNLRB2</i>         | -1,13 | 7,14E-02 | 2,59E-01 |
| <i>BBS1</i>            | -1,10 | 7,14E-02 | 2,59E-01 |
| <i>ARV1</i>            | -1,09 | 7,14E-02 | 2,59E-01 |
| <i>LOC90624</i>        | -1,08 | 7,14E-02 | 2,59E-01 |
| <i>MIA3</i>            | -1,08 | 7,14E-02 | 2,59E-01 |
| <i>NRN1</i>            | 1,11  | 7,14E-02 | 2,59E-01 |
| <i>ProSAPiP1</i>       | 1,12  | 7,14E-02 | 2,59E-01 |
| <i>THC2308587</i>      | 1,19  | 7,15E-02 | 2,59E-01 |
| <i>C21orf82</i>        | 1,22  | 7,16E-02 | 2,59E-01 |
| <i>ENST00000359743</i> | -1,12 | 7,16E-02 | 2,59E-01 |
| <i>THC2375159</i>      | -1,09 | 7,16E-02 | 2,59E-01 |
| <i>ENST00000345365</i> | -1,06 | 7,16E-02 | 2,59E-01 |
| <i>RUSC1</i>           | 1,06  | 7,16E-02 | 2,59E-01 |

|                 |       |          |          |
|-----------------|-------|----------|----------|
| AW294929        | 1,08  | 7,17E-02 | 2,59E-01 |
| AK098043        | -1,12 | 7,17E-02 | 2,59E-01 |
| CB052856        | -1,06 | 7,17E-02 | 2,60E-01 |
| THC2447899      | -1,06 | 7,17E-02 | 2,60E-01 |
| BQ188033        | -1,11 | 7,17E-02 | 2,60E-01 |
| EBPL            | -1,10 | 7,18E-02 | 2,60E-01 |
| KLC3            | -1,15 | 7,18E-02 | 2,60E-01 |
| ZNF467          | 1,08  | 7,18E-02 | 2,60E-01 |
| MITF            | -1,20 | 7,18E-02 | 2,60E-01 |
| THC2398099      | -1,07 | 7,18E-02 | 2,60E-01 |
| ZFP41           | -1,07 | 7,18E-02 | 2,60E-01 |
| ACOT11          | 1,08  | 7,19E-02 | 2,60E-01 |
| A_24_P212355    | 1,13  | 7,19E-02 | 2,60E-01 |
| A_32_P8971      | 1,08  | 7,19E-02 | 2,60E-01 |
| AW856073        | -1,12 | 7,19E-02 | 2,60E-01 |
| HS3ST2          | 1,19  | 7,20E-02 | 2,60E-01 |
| THC2300907      | -1,09 | 7,20E-02 | 2,60E-01 |
| LOC92689        | 1,12  | 7,20E-02 | 2,60E-01 |
| NR5A1           | 1,07  | 7,20E-02 | 2,60E-01 |
| HAVCR2          | -1,11 | 7,21E-02 | 2,60E-01 |
| ENST00000263123 | -1,10 | 7,21E-02 | 2,60E-01 |
| THC2276742      | -1,10 | 7,21E-02 | 2,60E-01 |
| ATG7            | -1,05 | 7,21E-02 | 2,60E-01 |
| NDUFA13         | 1,08  | 7,21E-02 | 2,60E-01 |
| A_32_P122951    | 1,08  | 7,21E-02 | 2,60E-01 |
| THAP8           | -1,11 | 7,21E-02 | 2,61E-01 |
| THC2284389      | -1,10 | 7,22E-02 | 2,61E-01 |
| FARS2           | 1,06  | 7,22E-02 | 2,61E-01 |
| FUZ             | 1,07  | 7,22E-02 | 2,61E-01 |
| AK022086        | 1,11  | 7,22E-02 | 2,61E-01 |
| PRSS16          | -1,09 | 7,22E-02 | 2,61E-01 |
| A_32_P101420    | -1,11 | 7,22E-02 | 2,61E-01 |
| CDH13           | -1,13 | 7,22E-02 | 2,61E-01 |
| ROM1            | -1,09 | 7,23E-02 | 2,61E-01 |
| BC020909        | -1,07 | 7,23E-02 | 2,61E-01 |
| COX5B           | 1,07  | 7,23E-02 | 2,61E-01 |
| AI423557        | 1,09  | 7,23E-02 | 2,61E-01 |
| SLC35F1         | 1,16  | 7,23E-02 | 2,61E-01 |
| C1S             | -1,13 | 7,23E-02 | 2,61E-01 |
| CSF1R           | -1,17 | 7,23E-02 | 2,61E-01 |
| LOC439992       | -1,07 | 7,23E-02 | 2,61E-01 |
| A_24_P237896    | 1,37  | 7,24E-02 | 2,61E-01 |
| HEG1            | 1,17  | 7,24E-02 | 2,61E-01 |
| CBFA2T2         | -1,07 | 7,24E-02 | 2,61E-01 |

|                        |       |          |          |
|------------------------|-------|----------|----------|
| <i>C3orf34</i>         | -1,06 | 7,24E-02 | 2,61E-01 |
| <i>DVL3</i>            | -1,07 | 7,24E-02 | 2,61E-01 |
| <i>MAGED2</i>          | -1,09 | 7,25E-02 | 2,61E-01 |
| <i>A_32_P100830</i>    | -1,17 | 7,25E-02 | 2,61E-01 |
| <i>C5orf20</i>         | -1,13 | 7,26E-02 | 2,61E-01 |
| <i>ENST00000370892</i> | -1,12 | 7,26E-02 | 2,61E-01 |
| <i>BM968605</i>        | -1,10 | 7,26E-02 | 2,61E-01 |
| <i>PHIP</i>            | -1,08 | 7,25E-02 | 2,61E-01 |
| <i>TBCC</i>            | -1,07 | 7,26E-02 | 2,61E-01 |
| <i>POGK</i>            | -1,05 | 7,25E-02 | 2,61E-01 |
| <i>TMEM83</i>          | 1,06  | 7,26E-02 | 2,61E-01 |
| <i>NUDT1</i>           | 1,08  | 7,25E-02 | 2,61E-01 |
| <i>CB853344</i>        | -1,08 | 7,26E-02 | 2,61E-01 |
| <i>TMC3</i>            | 1,08  | 7,26E-02 | 2,61E-01 |
| <i>VPS36</i>           | 1,13  | 7,26E-02 | 2,61E-01 |
| <i>TMEM101</i>         | -1,07 | 7,27E-02 | 2,61E-01 |
| <i>NFATC3</i>          | -1,07 | 7,27E-02 | 2,61E-01 |
| <i>IFI16</i>           | 1,14  | 7,27E-02 | 2,61E-01 |
| <i>KIF21B</i>          | -1,08 | 7,27E-02 | 2,61E-01 |
| <i>GLRB</i>            | -1,17 | 7,27E-02 | 2,61E-01 |
| <i>ZNF200</i>          | -1,06 | 7,28E-02 | 2,62E-01 |
| <i>AK074291</i>        | -1,06 | 7,28E-02 | 2,62E-01 |
| <i>AL525862</i>        | 1,08  | 7,28E-02 | 2,62E-01 |
| <i>AF076205</i>        | -1,53 | 7,29E-02 | 2,62E-01 |
| <i>BC067907</i>        | -1,09 | 7,29E-02 | 2,62E-01 |
| <i>ENST00000267197</i> | -1,07 | 7,28E-02 | 2,62E-01 |
| <i>PIAS2</i>           | 1,05  | 7,29E-02 | 2,62E-01 |
| <i>ACTN4</i>           | 1,13  | 7,30E-02 | 2,62E-01 |
| <i>ENST00000329493</i> | 1,07  | 7,30E-02 | 2,62E-01 |
| <i>STX8</i>            | 1,07  | 7,30E-02 | 2,62E-01 |
| <i>HIST1H2AD</i>       | 1,10  | 7,30E-02 | 2,62E-01 |
| <i>THC2416677</i>      | 1,33  | 7,30E-02 | 2,62E-01 |
| <i>THC2441046</i>      | -1,07 | 7,30E-02 | 2,62E-01 |
| <i>A_24_P418216</i>    | 1,07  | 7,30E-02 | 2,62E-01 |
| <i>ENST00000331425</i> | -1,12 | 7,31E-02 | 2,62E-01 |
| <i>ENST00000380108</i> | 1,07  | 7,31E-02 | 2,62E-01 |
| <i>THC2316688</i>      | -1,09 | 7,31E-02 | 2,62E-01 |
| <i>PCBP1</i>           | -1,07 | 7,32E-02 | 2,62E-01 |
| <i>ABCB7</i>           | 1,07  | 7,32E-02 | 2,62E-01 |
| <i>KIAA1840</i>        | -1,10 | 7,32E-02 | 2,62E-01 |
| <i>SIRT5</i>           | -1,06 | 7,32E-02 | 2,63E-01 |
| <i>KIF23</i>           | 1,11  | 7,32E-02 | 2,63E-01 |
| <i>THC2383225</i>      | 1,11  | 7,32E-02 | 2,63E-01 |
| <i>NOX5</i>            | 1,21  | 7,32E-02 | 2,63E-01 |

|                        |       |          |          |
|------------------------|-------|----------|----------|
| <i>TRRAP</i>           | -1,07 | 7,33E-02 | 2,63E-01 |
| <i>THC2360810</i>      | 1,14  | 7,33E-02 | 2,63E-01 |
| <i>ENST00000354417</i> | 1,26  | 7,33E-02 | 2,63E-01 |
| <i>AL040873</i>        | 1,09  | 7,33E-02 | 2,63E-01 |
| <i>RKHD1</i>           | 1,08  | 7,33E-02 | 2,63E-01 |
| <i>AK123610</i>        | -1,10 | 7,33E-02 | 2,63E-01 |
| <i>LOC374491</i>       | -1,08 | 7,34E-02 | 2,63E-01 |
| <i>MPHOSPH10</i>       | -1,08 | 7,34E-02 | 2,63E-01 |
| <i>MORF4L2</i>         | -1,15 | 7,35E-02 | 2,63E-01 |
| <i>FLT3LG</i>          | 1,08  | 7,34E-02 | 2,63E-01 |
| <i>GOLPH4</i>          | 1,14  | 7,35E-02 | 2,63E-01 |
| <i>TTYH1</i>           | 1,17  | 7,35E-02 | 2,63E-01 |
| <i>CR610374</i>        | -1,14 | 7,35E-02 | 2,63E-01 |
| <i>MGC34821</i>        | 1,07  | 7,35E-02 | 2,63E-01 |
| <i>DUSP26</i>          | 1,36  | 7,35E-02 | 2,63E-01 |
| <i>MGC33894</i>        | 1,07  | 7,35E-02 | 2,63E-01 |
| <i>AF131795</i>        | -1,17 | 7,37E-02 | 2,64E-01 |
| <i>FLJ44894</i>        | -1,13 | 7,37E-02 | 2,64E-01 |
| <i>B3GALT1</i>         | 1,08  | 7,37E-02 | 2,64E-01 |
| <i>ENST00000328018</i> | -1,20 | 7,37E-02 | 2,64E-01 |
| <i>BC021053</i>        | -1,09 | 7,37E-02 | 2,64E-01 |
| <i>STRAP</i>           | 1,07  | 7,37E-02 | 2,64E-01 |
| <i>IMP4</i>            | 1,07  | 7,37E-02 | 2,64E-01 |
| <i>AK055386</i>        | -1,26 | 7,38E-02 | 2,64E-01 |
| <i>EPHA5</i>           | -1,17 | 7,38E-02 | 2,64E-01 |
| <i>CR593560</i>        | -1,14 | 7,38E-02 | 2,64E-01 |
| <i>TIA1</i>            | -1,11 | 7,39E-02 | 2,64E-01 |
| <i>C1orf59</i>         | -1,09 | 7,38E-02 | 2,64E-01 |
| <i>CR605444</i>        | -1,08 | 7,38E-02 | 2,64E-01 |
| <i>THC2377151</i>      | -1,07 | 7,38E-02 | 2,64E-01 |
| <i>ENST00000377705</i> | -1,07 | 7,38E-02 | 2,64E-01 |
| <i>A_23_P144317</i>    | -1,06 | 7,38E-02 | 2,64E-01 |
| <i>ACSL4</i>           | 1,06  | 7,39E-02 | 2,64E-01 |
| <i>SLC4A1</i>          | 1,07  | 7,37E-02 | 2,64E-01 |
| <i>AK098417</i>        | 1,07  | 7,38E-02 | 2,64E-01 |
| <i>A_23_P11902</i>     | 1,11  | 7,38E-02 | 2,64E-01 |
| <i>THC2407148</i>      | 1,11  | 7,37E-02 | 2,64E-01 |
| <i>ODZ3</i>            | 1,13  | 7,38E-02 | 2,64E-01 |
| <i>GDF8</i>            | 1,19  | 7,38E-02 | 2,64E-01 |
| <i>UBXD3</i>           | 1,23  | 7,38E-02 | 2,64E-01 |
| <i>BG821581</i>        | 1,11  | 7,39E-02 | 2,64E-01 |
| <i>ENST00000374106</i> | -1,12 | 7,39E-02 | 2,64E-01 |
| <i>SPANXA1</i>         | -1,06 | 7,39E-02 | 2,64E-01 |
| <i>W27166</i>          | -1,11 | 7,39E-02 | 2,64E-01 |

|                        |       |          |          |
|------------------------|-------|----------|----------|
| <i>EGLN3</i>           | 1,17  | 7,39E-02 | 2,64E-01 |
| <i>AI686776</i>        | 1,05  | 7,39E-02 | 2,64E-01 |
| <i>LAG3</i>            | -1,43 | 7,40E-02 | 2,64E-01 |
| <i>AY358259</i>        | -1,12 | 7,40E-02 | 2,64E-01 |
| <i>GABRB3</i>          | -1,08 | 7,40E-02 | 2,64E-01 |
| <i>PROP1</i>           | 1,07  | 7,40E-02 | 2,64E-01 |
| <i>MAP1LC3A</i>        | 1,09  | 7,40E-02 | 2,64E-01 |
| <i>TUBA1</i>           | 1,13  | 7,40E-02 | 2,64E-01 |
| <i>NT5M</i>            | -1,10 | 7,40E-02 | 2,64E-01 |
| <i>MOSPD2</i>          | -1,07 | 7,41E-02 | 2,64E-01 |
| <i>HP1BP3</i>          | -1,08 | 7,41E-02 | 2,64E-01 |
| <i>RDH8</i>            | 1,06  | 7,41E-02 | 2,64E-01 |
| <i>A_32_P31992</i>     | 1,06  | 7,41E-02 | 2,64E-01 |
| <i>CLTCL1</i>          | 1,10  | 7,41E-02 | 2,64E-01 |
| <i>THC2272137</i>      | 1,17  | 7,41E-02 | 2,64E-01 |
| <i>ENST00000380456</i> | 1,17  | 7,41E-02 | 2,64E-01 |
| <i>ENST00000361429</i> | 1,18  | 7,41E-02 | 2,64E-01 |
| <i>DNAJC15</i>         | 1,20  | 7,41E-02 | 2,64E-01 |
| <i>TMEM128</i>         | -1,11 | 7,42E-02 | 2,64E-01 |
| <i>UMPS</i>            | -1,08 | 7,42E-02 | 2,64E-01 |
| <i>A_32_P185089</i>    | 1,14  | 7,42E-02 | 2,64E-01 |
| <i>ENST00000343519</i> | 1,20  | 7,43E-02 | 2,64E-01 |
| <i>IGLV6-57</i>        | -1,23 | 7,43E-02 | 2,64E-01 |
| <i>CR616041</i>        | -1,08 | 7,43E-02 | 2,64E-01 |
| <i>LOC389199</i>       | 1,13  | 7,43E-02 | 2,64E-01 |
| <i>PRSS35</i>          | 1,29  | 7,43E-02 | 2,64E-01 |
| <i>BF378046</i>        | -1,20 | 7,44E-02 | 2,64E-01 |
| <i>FLJ30672</i>        | 1,09  | 7,44E-02 | 2,64E-01 |
| <i>GNS</i>             | 1,09  | 7,44E-02 | 2,64E-01 |
| <i>UQCRC1</i>          | 1,11  | 7,44E-02 | 2,64E-01 |
| <i>GPLD1</i>           | -1,08 | 7,44E-02 | 2,65E-01 |
| <i>LEMD2</i>           | -1,06 | 7,44E-02 | 2,65E-01 |
| <i>MGC33212</i>        | -1,09 | 7,46E-02 | 2,65E-01 |
| <i>SCIN</i>            | -1,12 | 7,46E-02 | 2,65E-01 |
| <i>AK023121</i>        | -1,09 | 7,46E-02 | 2,65E-01 |
| <i>BC080576</i>        | 1,09  | 7,46E-02 | 2,65E-01 |
| <i>RANBP6</i>          | -1,09 | 7,46E-02 | 2,65E-01 |
| <i>SATB1</i>           | 1,10  | 7,46E-02 | 2,65E-01 |
| <i>RNF25</i>           | 1,05  | 7,47E-02 | 2,65E-01 |
| <i>AI933640</i>        | 1,05  | 7,47E-02 | 2,65E-01 |
| <i>NPFF</i>            | -1,07 | 7,47E-02 | 2,65E-01 |
| <i>DNAJB14</i>         | 1,06  | 7,47E-02 | 2,65E-01 |
| <i>CR602285</i>        | 1,06  | 7,47E-02 | 2,65E-01 |
| <i>KIAA0319</i>        | -1,07 | 7,48E-02 | 2,65E-01 |



|                        |       |          |          |
|------------------------|-------|----------|----------|
| <i>CNOT2</i>           | -1,05 | 7,48E-02 | 2,65E-01 |
| <i>FBXO33</i>          | 1,07  | 7,48E-02 | 2,65E-01 |
| <i>A_23_P10091</i>     | 1,09  | 7,49E-02 | 2,66E-01 |
| <i>THC2405037</i>      | 1,06  | 7,49E-02 | 2,66E-01 |
| <i>ABCA9</i>           | -1,23 | 7,49E-02 | 2,66E-01 |
| <i>FAM46A</i>          | -1,12 | 7,49E-02 | 2,66E-01 |
| <i>A_23_P11119</i>     | -1,09 | 7,49E-02 | 2,66E-01 |
| <i>BCO10544</i>        | -1,09 | 7,49E-02 | 2,66E-01 |
| <i>C1orf26</i>         | -1,09 | 7,49E-02 | 2,66E-01 |
| <i>SLC10A1</i>         | 1,08  | 7,49E-02 | 2,66E-01 |
| <i>CDR2</i>            | 1,09  | 7,49E-02 | 2,66E-01 |
| <i>C14orf112</i>       | -1,06 | 7,50E-02 | 2,66E-01 |
| <i>TNFAIP8L3</i>       | 1,12  | 7,50E-02 | 2,66E-01 |
| <i>SNCB</i>            | 1,12  | 7,50E-02 | 2,66E-01 |
| <i>TAS2R14</i>         | -1,12 | 7,51E-02 | 2,66E-01 |
| <i>ENST00000381781</i> | -1,08 | 7,51E-02 | 2,66E-01 |
| <i>SORBS1</i>          | 1,26  | 7,50E-02 | 2,66E-01 |
| <i>CORO1B</i>          | 1,07  | 7,51E-02 | 2,66E-01 |
| <i>THC2378409</i>      | 1,05  | 7,51E-02 | 2,66E-01 |
| <i>PQLC3</i>           | -1,08 | 7,51E-02 | 2,66E-01 |
| <i>THC2306982</i>      | -1,07 | 7,51E-02 | 2,66E-01 |
| <i>ARPP-19</i>         | 1,08  | 7,52E-02 | 2,66E-01 |
| <i>SSTR3</i>           | 1,16  | 7,52E-02 | 2,66E-01 |
| <i>AMN</i>             | 1,11  | 7,52E-02 | 2,66E-01 |
| <i>ZNF395</i>          | -1,12 | 7,53E-02 | 2,66E-01 |
| <i>AK093508</i>        | -1,10 | 7,53E-02 | 2,66E-01 |
| <i>THC2340322</i>      | 1,07  | 7,53E-02 | 2,66E-01 |
| <i>BCO33582</i>        | 1,07  | 7,53E-02 | 2,66E-01 |
| <i>A_24_P475814</i>    | 1,09  | 7,53E-02 | 2,66E-01 |
| <i>PIGT</i>            | 1,09  | 7,53E-02 | 2,66E-01 |
| <i>A_24_P872359</i>    | 1,09  | 7,53E-02 | 2,66E-01 |
| <i>A_24_P655888</i>    | 1,25  | 7,53E-02 | 2,66E-01 |
| <i>AF083130</i>        | 1,07  | 7,53E-02 | 2,66E-01 |
| <i>AA814903</i>        | 1,07  | 7,54E-02 | 2,67E-01 |
| <i>TRUB1</i>           | -1,11 | 7,54E-02 | 2,67E-01 |
| <i>AK092544</i>        | -1,22 | 7,55E-02 | 2,67E-01 |
| <i>BG741106</i>        | -1,14 | 7,55E-02 | 2,67E-01 |
| <i>SULT1A1</i>         | -1,10 | 7,54E-02 | 2,67E-01 |
| <i>FAM13A1</i>         | -1,09 | 7,55E-02 | 2,67E-01 |
| <i>FLJ33790</i>        | -1,08 | 7,54E-02 | 2,67E-01 |
| <i>TSGA2</i>           | -1,29 | 7,55E-02 | 2,67E-01 |
| <i>AA541413</i>        | -1,15 | 7,55E-02 | 2,67E-01 |
| <i>NUDT10</i>          | -1,25 | 7,56E-02 | 2,67E-01 |
| <i>ABCC11</i>          | -1,07 | 7,56E-02 | 2,67E-01 |

|                 |       |          |          |
|-----------------|-------|----------|----------|
| ZDHHC19         | 1,05  | 7,56E-02 | 2,67E-01 |
| CB243794        | -1,08 | 7,56E-02 | 2,67E-01 |
| AL567265        | 1,07  | 7,56E-02 | 2,67E-01 |
| SFRP4           | -1,28 | 7,57E-02 | 2,67E-01 |
| SLC34A1         | -1,09 | 7,57E-02 | 2,67E-01 |
| AI885390        | 1,06  | 7,57E-02 | 2,67E-01 |
| NSUN4           | 1,07  | 7,57E-02 | 2,67E-01 |
| SLC26A9         | 1,07  | 7,58E-02 | 2,67E-01 |
| BF516462        | 1,09  | 7,58E-02 | 2,67E-01 |
| ZNF384          | -1,06 | 7,58E-02 | 2,67E-01 |
| THC2289082      | 1,12  | 7,59E-02 | 2,68E-01 |
| KIAA0841        | -1,07 | 7,59E-02 | 2,68E-01 |
| A_24_P358868    | -1,12 | 7,59E-02 | 2,68E-01 |
| NAV1            | 1,11  | 7,59E-02 | 2,68E-01 |
| C2              | 1,20  | 7,59E-02 | 2,68E-01 |
| ARHGEF18        | -1,09 | 7,59E-02 | 2,68E-01 |
| KCNAB3          | -1,08 | 7,60E-02 | 2,68E-01 |
| ATP13A2         | -1,07 | 7,60E-02 | 2,68E-01 |
| THC2374431      | -1,08 | 7,60E-02 | 2,68E-01 |
| SLC1A2          | 1,17  | 7,60E-02 | 2,68E-01 |
| A_24_P471242    | 1,10  | 7,60E-02 | 2,68E-01 |
| VPS37D          | -1,11 | 7,61E-02 | 2,68E-01 |
| LOC160313       | -1,10 | 7,61E-02 | 2,68E-01 |
| KIAA0652        | 1,07  | 7,61E-02 | 2,68E-01 |
| AMH             | 1,07  | 7,61E-02 | 2,68E-01 |
| C6orf151        | -1,09 | 7,61E-02 | 2,68E-01 |
| OXS1            | 1,06  | 7,61E-02 | 2,68E-01 |
| PARP15          | 1,07  | 7,61E-02 | 2,68E-01 |
| PTPRB           | 1,11  | 7,61E-02 | 2,68E-01 |
| BX458358        | -1,06 | 7,62E-02 | 2,68E-01 |
| GPR174          | -1,08 | 7,62E-02 | 2,68E-01 |
| ALDH1A2         | -1,23 | 7,63E-02 | 2,68E-01 |
| AL390157        | -1,07 | 7,63E-02 | 2,68E-01 |
| TPT1            | -1,08 | 7,63E-02 | 2,68E-01 |
| THC2379991      | -1,06 | 7,63E-02 | 2,68E-01 |
| RUNX1           | 1,16  | 7,63E-02 | 2,68E-01 |
| ENST00000334827 | 1,07  | 7,63E-02 | 2,68E-01 |
| FLJ33641        | -1,14 | 7,63E-02 | 2,68E-01 |
| LOC642580       | 1,08  | 7,63E-02 | 2,68E-01 |
| EID-3           | -1,11 | 7,64E-02 | 2,68E-01 |
| A_24_P945276    | 1,07  | 7,64E-02 | 2,68E-01 |
| ADCYAP1R1       | -1,09 | 7,64E-02 | 2,68E-01 |
| AK092378        | -1,23 | 7,65E-02 | 2,69E-01 |
| RHEBL1          | -1,08 | 7,66E-02 | 2,69E-01 |

|                        |       |          |          |
|------------------------|-------|----------|----------|
| <i>SMAP1</i>           | 1,06  | 7,65E-02 | 2,69E-01 |
| <i>TTC1</i>            | 1,07  | 7,66E-02 | 2,69E-01 |
| <i>H43551</i>          | 1,07  | 7,66E-02 | 2,69E-01 |
| <i>THC2384272</i>      | 1,11  | 7,65E-02 | 2,69E-01 |
| <i>ENST00000166133</i> | 1,07  | 7,66E-02 | 2,69E-01 |
| <i>UQCRH</i>           | 1,06  | 7,66E-02 | 2,69E-01 |
| <i>BC053632</i>        | -1,09 | 7,67E-02 | 2,69E-01 |
| <i>CR607522</i>        | 1,15  | 7,67E-02 | 2,69E-01 |
| <i>EBI3</i>            | -1,08 | 7,67E-02 | 2,69E-01 |
| <i>KCNV2</i>           | 1,07  | 7,67E-02 | 2,69E-01 |
| <i>AK123912</i>        | -1,14 | 7,67E-02 | 2,69E-01 |
| <i>RAI2</i>            | -1,13 | 7,68E-02 | 2,69E-01 |
| <i>WAS</i>             | 1,05  | 7,68E-02 | 2,69E-01 |
| <i>PPP1R10</i>         | 1,10  | 7,68E-02 | 2,69E-01 |
| <i>GGT6</i>            | -1,11 | 7,68E-02 | 2,69E-01 |
| <i>PTS</i>             | 1,08  | 7,68E-02 | 2,69E-01 |
| <i>BC045798</i>        | -1,07 | 7,68E-02 | 2,69E-01 |
| <i>A_24_P918242</i>    | 1,06  | 7,68E-02 | 2,69E-01 |
| <i>BF803156</i>        | -1,15 | 7,69E-02 | 2,69E-01 |
| <i>LOC399491</i>       | -1,13 | 7,69E-02 | 2,69E-01 |
| <i>TLL1</i>            | -1,11 | 7,69E-02 | 2,69E-01 |
| <i>PLAGL2</i>          | -1,09 | 7,70E-02 | 2,69E-01 |
| <i>ENO3</i>            | -1,09 | 7,69E-02 | 2,69E-01 |
| <i>RNASEN</i>          | -1,06 | 7,70E-02 | 2,69E-01 |
| <i>THC2278309</i>      | -1,05 | 7,69E-02 | 2,69E-01 |
| <i>PLEKHA1</i>         | 1,07  | 7,69E-02 | 2,69E-01 |
| <i>AY010114</i>        | 1,07  | 7,69E-02 | 2,69E-01 |
| <i>ENST00000378578</i> | 1,07  | 7,69E-02 | 2,69E-01 |
| <i>GLIS2</i>           | 1,08  | 7,70E-02 | 2,69E-01 |
| <i>BC031320</i>        | 1,09  | 7,69E-02 | 2,69E-01 |
| <i>AA114874</i>        | 1,10  | 7,69E-02 | 2,69E-01 |
| <i>TAP1</i>            | 1,12  | 7,70E-02 | 2,69E-01 |
| <i>SLC20A1</i>         | 1,15  | 7,70E-02 | 2,69E-01 |
| <i>C13orf25</i>        | 1,16  | 7,69E-02 | 2,69E-01 |
| <i>THC2314599</i>      | -1,12 | 7,71E-02 | 2,70E-01 |
| <i>CCDC34</i>          | -1,08 | 7,70E-02 | 2,70E-01 |
| <i>A_32_P73039</i>     | -1,08 | 7,71E-02 | 2,70E-01 |
| <i>LOC390414</i>       | -1,07 | 7,70E-02 | 2,70E-01 |
| <i>C17orf77</i>        | 1,07  | 7,70E-02 | 2,70E-01 |
| <i>CXorf59</i>         | 1,07  | 7,71E-02 | 2,70E-01 |
| <i>BC110083</i>        | 1,08  | 7,71E-02 | 2,70E-01 |
| <i>BF767798</i>        | 1,08  | 7,71E-02 | 2,70E-01 |
| <i>PLEKHA4</i>         | 1,12  | 7,70E-02 | 2,70E-01 |
| <i>AA807748</i>        | -1,08 | 7,72E-02 | 2,70E-01 |

|                        |       |          |          |
|------------------------|-------|----------|----------|
| <i>LOC645953</i>       | 1,08  | 7,73E-02 | 2,70E-01 |
| <i>NICN1</i>           | -1,07 | 7,73E-02 | 2,70E-01 |
| <i>A_24_P229728</i>    | -1,09 | 7,74E-02 | 2,70E-01 |
| <i>MSN</i>             | 1,07  | 7,74E-02 | 2,70E-01 |
| <i>TF</i>              | -1,10 | 7,74E-02 | 2,70E-01 |
| <i>AF100640</i>        | -1,06 | 7,74E-02 | 2,71E-01 |
| <i>THC2304728</i>      | 1,12  | 7,75E-02 | 2,71E-01 |
| <i>BAI3</i>            | 1,18  | 7,74E-02 | 2,71E-01 |
| <i>CRTAM</i>           | -1,15 | 7,75E-02 | 2,71E-01 |
| <i>SH2B2</i>           | 1,10  | 7,75E-02 | 2,71E-01 |
| <i>GRK7</i>            | 1,09  | 7,75E-02 | 2,71E-01 |
| <i>BAZ2B</i>           | -1,09 | 7,76E-02 | 2,71E-01 |
| <i>FGF20</i>           | -1,07 | 7,76E-02 | 2,71E-01 |
| <i>C15orf51</i>        | -1,08 | 7,76E-02 | 2,71E-01 |
| <i>TSR1</i>            | 1,07  | 7,76E-02 | 2,71E-01 |
| <i>ENST00000281133</i> | 1,07  | 7,76E-02 | 2,71E-01 |
| <i>BE930053</i>        | 1,11  | 7,76E-02 | 2,71E-01 |
| <i>FAM7A3</i>          | 1,19  | 7,76E-02 | 2,71E-01 |
| <i>UGT2B11</i>         | -1,07 | 7,77E-02 | 2,71E-01 |
| <i>SIGLEC12</i>        | -1,09 | 7,77E-02 | 2,71E-01 |
| <i>NIPA1</i>           | 1,07  | 7,77E-02 | 2,71E-01 |
| <i>C9orf16</i>         | 1,09  | 7,77E-02 | 2,71E-01 |
| <i>BC029655</i>        | -1,07 | 7,78E-02 | 2,71E-01 |
| <i>AA991174</i>        | 1,07  | 7,78E-02 | 2,71E-01 |
| <i>ZZEF1</i>           | 1,05  | 7,78E-02 | 2,71E-01 |
| <i>THC2375512</i>      | 1,19  | 7,78E-02 | 2,71E-01 |
| <i>AF244570</i>        | -1,06 | 7,78E-02 | 2,71E-01 |
| <i>AK021439</i>        | -1,12 | 7,79E-02 | 2,71E-01 |
| <i>DRD2</i>            | 1,07  | 7,79E-02 | 2,71E-01 |
| <i>SLC22A18AS</i>      | 1,11  | 7,79E-02 | 2,71E-01 |
| <i>BI523298</i>        | -1,16 | 7,79E-02 | 2,71E-01 |
| <i>HERV-FRD</i>        | -1,05 | 7,79E-02 | 2,71E-01 |
| <i>CD048206</i>        | 1,05  | 7,79E-02 | 2,71E-01 |
| <i>PCK1</i>            | 1,05  | 7,79E-02 | 2,71E-01 |
| <i>BBC3</i>            | 1,06  | 7,79E-02 | 2,71E-01 |
| <i>AF085874</i>        | 1,07  | 7,79E-02 | 2,71E-01 |
| <i>SLIT2</i>           | -1,13 | 7,80E-02 | 2,71E-01 |
| <i>A_23_P125844</i>    | -1,06 | 7,80E-02 | 2,72E-01 |
| <i>COPB1</i>           | -1,08 | 7,81E-02 | 2,72E-01 |
| <i>VAMP2</i>           | 1,10  | 7,81E-02 | 2,72E-01 |
| <i>RALBP1</i>          | 1,07  | 7,81E-02 | 2,72E-01 |
| <i>PPP2R2D</i>         | 1,06  | 7,82E-02 | 2,72E-01 |
| <i>RPGR</i>            | 1,13  | 7,82E-02 | 2,72E-01 |
| <i>THC2276996</i>      | -1,10 | 7,82E-02 | 2,72E-01 |

|                        |       |          |          |
|------------------------|-------|----------|----------|
| <i>FLJ13236</i>        | -1,06 | 7,82E-02 | 2,72E-01 |
| <i>CGI-69</i>          | 1,09  | 7,82E-02 | 2,72E-01 |
| <i>ENST00000309295</i> | 1,15  | 7,82E-02 | 2,72E-01 |
| <i>ASF1A</i>           | -1,07 | 7,83E-02 | 2,72E-01 |
| <i>BU616488</i>        | -1,11 | 7,83E-02 | 2,72E-01 |
| <i>CCNT2</i>           | -1,07 | 7,84E-02 | 2,72E-01 |
| <i>THC2453775</i>      | -1,08 | 7,84E-02 | 2,72E-01 |
| <i>ENST00000366699</i> | -1,07 | 7,84E-02 | 2,72E-01 |
| <i>A_32_P125219</i>    | 1,06  | 7,84E-02 | 2,72E-01 |
| <i>THC2356023</i>      | -1,16 | 7,84E-02 | 2,72E-01 |
| <i>AI190733</i>        | 1,06  | 7,84E-02 | 2,72E-01 |
| <i>A_24_P928582</i>    | 1,08  | 7,84E-02 | 2,73E-01 |
| <i>A_32_P230537</i>    | -1,16 | 7,85E-02 | 2,73E-01 |
| <i>BX640636</i>        | 1,08  | 7,84E-02 | 2,73E-01 |
| <i>ART5</i>            | -1,19 | 7,85E-02 | 2,73E-01 |
| <i>A_23_P77389</i>     | -1,15 | 7,85E-02 | 2,73E-01 |
| <i>DPP4</i>            | -1,11 | 7,85E-02 | 2,73E-01 |
| <i>ENST00000377538</i> | 1,08  | 7,85E-02 | 2,73E-01 |
| <i>RP11-34P13.4</i>    | 1,06  | 7,85E-02 | 2,73E-01 |
| <i>A_32_P3048</i>      | 1,07  | 7,86E-02 | 2,73E-01 |
| <i>RAB15</i>           | 1,13  | 7,86E-02 | 2,73E-01 |
| <i>CD1E</i>            | -1,13 | 7,86E-02 | 2,73E-01 |
| <i>A_24_P92624</i>     | -1,13 | 7,86E-02 | 2,73E-01 |
| <i>A_32_P138883</i>    | 1,06  | 7,86E-02 | 2,73E-01 |
| <i>CTLA4</i>           | 1,06  | 7,86E-02 | 2,73E-01 |
| <i>AK074141</i>        | -1,12 | 7,86E-02 | 2,73E-01 |
| <i>ZNF673</i>          | -1,07 | 7,86E-02 | 2,73E-01 |
| <i>BCAM</i>            | 1,07  | 7,86E-02 | 2,73E-01 |
| <i>SLC35E3</i>         | -1,06 | 7,87E-02 | 2,73E-01 |
| <i>DHFR</i>            | -1,12 | 7,87E-02 | 2,73E-01 |
| <i>SCUBE2</i>          | -1,51 | 7,87E-02 | 2,73E-01 |
| <i>A_32_P181339</i>    | -1,11 | 7,87E-02 | 2,73E-01 |
| <i>A_32_P25631</i>     | -1,07 | 7,87E-02 | 2,73E-01 |
| <i>A_32_P64106</i>     | 1,05  | 7,87E-02 | 2,73E-01 |
| <i>AA975908</i>        | 1,06  | 7,87E-02 | 2,73E-01 |
| <i>AK054768</i>        | 1,07  | 7,87E-02 | 2,73E-01 |
| <i>MGC48595</i>        | -1,07 | 7,88E-02 | 2,73E-01 |
| <i>CHRN2</i>           | 1,15  | 7,88E-02 | 2,73E-01 |
| <i>LYSMD4</i>          | -1,09 | 7,89E-02 | 2,73E-01 |
| <i>POLS</i>            | -1,06 | 7,89E-02 | 2,73E-01 |
| <i>EDG6</i>            | -1,15 | 7,89E-02 | 2,73E-01 |
| <i>ACOT12</i>          | -1,09 | 7,91E-02 | 2,74E-01 |
| <i>AK021593</i>        | -1,10 | 7,91E-02 | 2,74E-01 |
| <i>ENST00000380985</i> | -1,12 | 7,92E-02 | 2,74E-01 |

|                        |       |          |          |
|------------------------|-------|----------|----------|
| <i>PPARD</i>           | 1,06  | 7,92E-02 | 2,74E-01 |
| <i>THC2283810</i>      | 1,29  | 7,92E-02 | 2,74E-01 |
| <i>KIAA1949</i>        | 1,09  | 7,92E-02 | 2,74E-01 |
| <i>LOC642398</i>       | -1,21 | 7,93E-02 | 2,74E-01 |
| <i>ENST00000331096</i> | -1,11 | 7,93E-02 | 2,74E-01 |
| <i>LIAS</i>            | -1,09 | 7,93E-02 | 2,74E-01 |
| <i>NBPF3</i>           | -1,07 | 7,93E-02 | 2,74E-01 |
| <i>SFRS14</i>          | -1,07 | 7,93E-02 | 2,74E-01 |
| <i>MUC13</i>           | -1,07 | 7,93E-02 | 2,74E-01 |
| <i>PPP1R8</i>          | -1,06 | 7,93E-02 | 2,74E-01 |
| <i>TRIM54</i>          | 1,06  | 7,93E-02 | 2,74E-01 |
| <i>PLXNA4B</i>         | 1,08  | 7,93E-02 | 2,74E-01 |
| <i>ORM1</i>            | 1,10  | 7,93E-02 | 2,74E-01 |
| <i>RAB31</i>           | 1,11  | 7,93E-02 | 2,74E-01 |
| <i>THC2307581</i>      | 1,26  | 7,93E-02 | 2,74E-01 |
| <i>ENST00000261364</i> | 1,38  | 7,93E-02 | 2,74E-01 |
| <i>BCDIN3</i>          | 1,09  | 7,94E-02 | 2,74E-01 |
| <i>C20orf108</i>       | -1,13 | 7,95E-02 | 2,74E-01 |
| <i>TNN</i>             | -1,11 | 7,94E-02 | 2,74E-01 |
| <i>ADAMTSL1</i>        | -1,07 | 7,94E-02 | 2,74E-01 |
| <i>C10orf28</i>        | -1,07 | 7,95E-02 | 2,74E-01 |
| <i>SCN11A</i>          | 1,07  | 7,94E-02 | 2,74E-01 |
| <i>BG218865</i>        | 1,08  | 7,94E-02 | 2,74E-01 |
| <i>NLK</i>             | 1,08  | 7,95E-02 | 2,74E-01 |
| <i>THC2429183</i>      | 1,12  | 7,95E-02 | 2,74E-01 |
| <i>PRSS12</i>          | 1,49  | 7,95E-02 | 2,74E-01 |
| <i>NPTX1</i>           | 1,24  | 7,96E-02 | 2,75E-01 |
| <i>AA235034</i>        | -1,12 | 7,96E-02 | 2,75E-01 |
| <i>A_24_P50554</i>     | -1,06 | 7,96E-02 | 2,75E-01 |
| <i>FLJ40606</i>        | 1,06  | 7,96E-02 | 2,75E-01 |
| <i>A_24_P942676</i>    | 1,05  | 7,96E-02 | 2,75E-01 |
| <i>SFMBT1</i>          | 1,08  | 7,96E-02 | 2,75E-01 |
| <i>AT_ssH_TR_5</i>     | 1,12  | 7,96E-02 | 2,75E-01 |
| <i>PGA5</i>            | -1,16 | 7,96E-02 | 2,75E-01 |
| <i>ENST00000265806</i> | 1,06  | 7,97E-02 | 2,75E-01 |
| <i>HES7</i>            | 1,07  | 7,97E-02 | 2,75E-01 |
| <i>PCGF1</i>           | -1,08 | 7,97E-02 | 2,75E-01 |
| <i>STARD8</i>          | -1,10 | 7,97E-02 | 2,75E-01 |
| <i>AK090911</i>        | 1,09  | 7,97E-02 | 2,75E-01 |
| <i>HPSE</i>            | -1,16 | 7,97E-02 | 2,75E-01 |
| <i>LOC645955</i>       | 1,09  | 7,97E-02 | 2,75E-01 |
| <i>LOC400464</i>       | -1,13 | 7,98E-02 | 2,75E-01 |
| <i>THC2275370</i>      | -1,07 | 7,98E-02 | 2,75E-01 |
| <i>THOC2</i>           | -1,06 | 7,98E-02 | 2,75E-01 |

|                        |       |          |          |
|------------------------|-------|----------|----------|
| <i>C21orf37</i>        | 1,06  | 7,98E-02 | 2,75E-01 |
| <i>ACY1L2</i>          | -1,10 | 7,99E-02 | 2,75E-01 |
| <i>VN1R3</i>           | 1,07  | 7,99E-02 | 2,75E-01 |
| <i>RNMT</i>            | 1,07  | 8,00E-02 | 2,75E-01 |
| <i>A_32_P187126</i>    | 1,10  | 8,00E-02 | 2,75E-01 |
| <i>SCN1B</i>           | 1,10  | 8,00E-02 | 2,76E-01 |
| <i>ITIH3</i>           | 1,44  | 8,00E-02 | 2,76E-01 |
| <i>PEMT</i>            | -1,08 | 8,01E-02 | 2,76E-01 |
| <i>IRX4</i>            | 1,10  | 8,01E-02 | 2,76E-01 |
| <i>SLC1A3</i>          | -1,16 | 8,01E-02 | 2,76E-01 |
| <i>A_32_P10589</i>     | 1,09  | 8,01E-02 | 2,76E-01 |
| <i>MID2</i>            | 1,07  | 8,01E-02 | 2,76E-01 |
| <i>THC2316918</i>      | 1,09  | 8,01E-02 | 2,76E-01 |
| <i>PAQR9</i>           | 1,16  | 8,01E-02 | 2,76E-01 |
| <i>C11orf39</i>        | 1,06  | 8,02E-02 | 2,76E-01 |
| <i>KIAA1908</i>        | -1,09 | 8,03E-02 | 2,76E-01 |
| <i>AK127378</i>        | 1,09  | 8,03E-02 | 2,76E-01 |
| <i>SEC61A2</i>         | -1,07 | 8,03E-02 | 2,76E-01 |
| <i>AI818096</i>        | 1,06  | 8,03E-02 | 2,76E-01 |
| <i>C9orf24</i>         | -1,34 | 8,04E-02 | 2,76E-01 |
| <i>ZNF655</i>          | -1,07 | 8,04E-02 | 2,76E-01 |
| <i>HGFAC</i>           | 1,08  | 8,04E-02 | 2,76E-01 |
| <i>DHX16</i>           | -1,06 | 8,05E-02 | 2,76E-01 |
| <i>UCP2</i>            | 1,15  | 8,05E-02 | 2,76E-01 |
| <i>MYH8</i>            | -1,07 | 8,05E-02 | 2,76E-01 |
| <i>BRSK2</i>           | 1,07  | 8,05E-02 | 2,77E-01 |
| <i>MYOC</i>            | -1,74 | 8,06E-02 | 2,77E-01 |
| <i>CTAGE1</i>          | 1,05  | 8,06E-02 | 2,77E-01 |
| <i>SMAD2</i>           | 1,05  | 8,07E-02 | 2,77E-01 |
| <i>MORC2</i>           | -1,07 | 8,07E-02 | 2,77E-01 |
| <i>GIT2</i>            | -1,07 | 8,07E-02 | 2,77E-01 |
| <i>ENST00000369547</i> | -1,05 | 8,07E-02 | 2,77E-01 |
| <i>AK5</i>             | 1,18  | 8,07E-02 | 2,77E-01 |
| <i>ENST00000309878</i> | 1,21  | 8,07E-02 | 2,77E-01 |
| <i>AL137569</i>        | -1,09 | 8,08E-02 | 2,77E-01 |
| <i>AF131841</i>        | 1,08  | 8,08E-02 | 2,77E-01 |
| <i>KIAA1143</i>        | 1,11  | 8,08E-02 | 2,77E-01 |
| <i>TRIM7</i>           | 1,13  | 8,08E-02 | 2,77E-01 |
| <i>ADAM20</i>          | -1,11 | 8,08E-02 | 2,77E-01 |
| <i>IDE</i>             | 1,11  | 8,09E-02 | 2,77E-01 |
| <i>THC2274524</i>      | -1,11 | 8,09E-02 | 2,78E-01 |
| <i>AW804939</i>        | -1,07 | 8,09E-02 | 2,78E-01 |
| <i>AF130109</i>        | 1,06  | 8,09E-02 | 2,78E-01 |
| <i>SAV1</i>            | 1,06  | 8,10E-02 | 2,78E-01 |

|                     |       |          |          |
|---------------------|-------|----------|----------|
| <i>AK092450</i>     | -1,14 | 8,11E-02 | 2,78E-01 |
| <i>A_23_P75820</i>  | 1,07  | 8,11E-02 | 2,78E-01 |
| <i>KDELC1</i>       | -1,10 | 8,13E-02 | 2,79E-01 |
| <i>TNF</i>          | 1,15  | 8,13E-02 | 2,79E-01 |
| <i>C14orf46</i>     | 1,07  | 8,13E-02 | 2,79E-01 |
| <i>AY358248</i>     | 1,08  | 8,13E-02 | 2,79E-01 |
| <i>CD300A</i>       | -1,12 | 8,14E-02 | 2,79E-01 |
| <i>RBBP4</i>        | -1,07 | 8,14E-02 | 2,79E-01 |
| <i>KIAA2018</i>     | 1,05  | 8,14E-02 | 2,79E-01 |
| <i>COX7C</i>        | 1,06  | 8,14E-02 | 2,79E-01 |
| <i>APBA2BP</i>      | 1,08  | 8,14E-02 | 2,79E-01 |
| <i>BC041007</i>     | -1,07 | 8,15E-02 | 2,79E-01 |
| <i>FAM9B</i>        | -1,10 | 8,15E-02 | 2,79E-01 |
| <i>C18orf57</i>     | 1,07  | 8,15E-02 | 2,79E-01 |
| <i>F25965</i>       | -1,09 | 8,15E-02 | 2,79E-01 |
| <i>SDCCAG10</i>     | 1,06  | 8,15E-02 | 2,79E-01 |
| <i>BACE2</i>        | 1,09  | 8,16E-02 | 2,79E-01 |
| <i>AV696077</i>     | -1,19 | 8,16E-02 | 2,79E-01 |
| <i>THC2323059</i>   | 1,22  | 8,16E-02 | 2,79E-01 |
| <i>LY6E</i>         | -1,15 | 8,17E-02 | 2,79E-01 |
| <i>TIMM22</i>       | -1,07 | 8,17E-02 | 2,79E-01 |
| <i>LOC134466</i>    | -1,25 | 8,17E-02 | 2,79E-01 |
| <i>AK056449</i>     | 1,07  | 8,17E-02 | 2,79E-01 |
| <i>THC2313287</i>   | 1,10  | 8,17E-02 | 2,79E-01 |
| <i>C4orf14</i>      | -1,08 | 8,18E-02 | 2,80E-01 |
| <i>FLJ38377</i>     | 1,08  | 8,18E-02 | 2,80E-01 |
| <i>RAD54L</i>       | -1,08 | 8,18E-02 | 2,80E-01 |
| <i>GLDN</i>         | 1,27  | 8,18E-02 | 2,80E-01 |
| <i>SFRS15</i>       | 1,05  | 8,19E-02 | 2,80E-01 |
| <i>BE551270</i>     | 1,07  | 8,19E-02 | 2,80E-01 |
| <i>GLIS1</i>        | 1,29  | 8,19E-02 | 2,80E-01 |
| <i>RANBP5</i>       | 1,07  | 8,19E-02 | 2,80E-01 |
| <i>A_32_P225768</i> | 1,16  | 8,19E-02 | 2,80E-01 |
| <i>BM684461</i>     | -1,10 | 8,19E-02 | 2,80E-01 |
| <i>C21orf51</i>     | -1,06 | 8,20E-02 | 2,80E-01 |
| <i>WDR90</i>        | -1,08 | 8,20E-02 | 2,80E-01 |
| <i>AF035297</i>     | -1,10 | 8,20E-02 | 2,80E-01 |
| <i>COL8A1</i>       | 1,45  | 8,20E-02 | 2,80E-01 |
| <i>SQRDL</i>        | 1,11  | 8,21E-02 | 2,80E-01 |
| <i>BC038747</i>     | -1,08 | 8,21E-02 | 2,80E-01 |
| <i>ARHGAP29</i>     | 1,10  | 8,21E-02 | 2,80E-01 |
| <i>THC2408471</i>   | 1,31  | 8,21E-02 | 2,80E-01 |
| <i>MAPKAP1</i>      | 1,17  | 8,21E-02 | 2,80E-01 |
| <i>HSA9761</i>      | 1,06  | 8,22E-02 | 2,80E-01 |



|                     |       |          |          |
|---------------------|-------|----------|----------|
| <i>BX101288</i>     | 1,08  | 8,22E-02 | 2,80E-01 |
| <i>CLEC5A</i>       | 1,06  | 8,22E-02 | 2,80E-01 |
| <i>CHRNA4</i>       | 1,10  | 8,22E-02 | 2,80E-01 |
| <i>PIGR</i>         | -1,07 | 8,23E-02 | 2,81E-01 |
| <i>BQ064481</i>     | 1,10  | 8,23E-02 | 2,81E-01 |
| <i>A_24_P915634</i> | -1,07 | 8,23E-02 | 2,81E-01 |
| <i>C17orf37</i>     | 1,05  | 8,23E-02 | 2,81E-01 |
| <i>DB328061</i>     | 1,09  | 8,23E-02 | 2,81E-01 |
| <i>CRLF1</i>        | 1,88  | 8,23E-02 | 2,81E-01 |
| <i>AI467970</i>     | -1,16 | 8,24E-02 | 2,81E-01 |
| <i>MCART1</i>       | 1,06  | 8,24E-02 | 2,81E-01 |
| <i>KLF12</i>        | 1,12  | 8,24E-02 | 2,81E-01 |
| <i>CTSO</i>         | 1,14  | 8,24E-02 | 2,81E-01 |
| <i>LMCD1</i>        | 1,23  | 8,24E-02 | 2,81E-01 |
| <i>JAK1</i>         | 1,11  | 8,24E-02 | 2,81E-01 |
| <i>FAM27L</i>       | 1,06  | 8,24E-02 | 2,81E-01 |
| <i>LOC284344</i>    | 1,06  | 8,25E-02 | 2,81E-01 |
| <i>SNCAIP</i>       | -1,22 | 8,25E-02 | 2,81E-01 |
| <i>THC2430017</i>   | 1,40  | 8,25E-02 | 2,81E-01 |
| <i>CENPJ</i>        | -1,06 | 8,25E-02 | 2,81E-01 |
| <i>PLA2G4C</i>      | 1,13  | 8,25E-02 | 2,81E-01 |
| <i>SLC5A12</i>      | -1,09 | 8,25E-02 | 2,81E-01 |
| <i>EPHX2</i>        | -1,12 | 8,26E-02 | 2,81E-01 |
| <i>GAB3</i>         | -1,09 | 8,26E-02 | 2,81E-01 |
| <i>HIST1H2BM</i>    | -1,08 | 8,26E-02 | 2,81E-01 |
| <i>BQ417071</i>     | -1,07 | 8,26E-02 | 2,81E-01 |
| <i>CDC5L</i>        | 1,07  | 8,26E-02 | 2,81E-01 |
| <i>LOC552891</i>    | 1,08  | 8,26E-02 | 2,81E-01 |
| <i>RPE65</i>        | 1,10  | 8,27E-02 | 2,81E-01 |
| <i>ANPEP</i>        | -1,22 | 8,28E-02 | 2,81E-01 |
| <i>NRP2</i>         | -1,20 | 8,28E-02 | 2,81E-01 |
| <i>THC2438324</i>   | -1,14 | 8,28E-02 | 2,81E-01 |
| <i>THC2438519</i>   | -1,11 | 8,27E-02 | 2,81E-01 |
| <i>SAAL1</i>        | -1,07 | 8,28E-02 | 2,81E-01 |
| <i>EIF4ENIF1</i>    | -1,06 | 8,27E-02 | 2,81E-01 |
| <i>C9orf153</i>     | -1,05 | 8,27E-02 | 2,81E-01 |
| <i>FOXJ1</i>        | -1,04 | 8,27E-02 | 2,81E-01 |
| <i>BM351936</i>     | 1,05  | 8,27E-02 | 2,81E-01 |
| <i>APCS</i>         | 1,06  | 8,28E-02 | 2,81E-01 |
| <i>CSPG5</i>        | 1,08  | 8,27E-02 | 2,81E-01 |
| <i>DAZ2</i>         | 1,04  | 8,28E-02 | 2,81E-01 |
| <i>BX116997</i>     | 1,10  | 8,28E-02 | 2,81E-01 |
| <i>RXRG</i>         | 1,18  | 8,28E-02 | 2,81E-01 |
| <i>CD3EAP</i>       | -1,06 | 8,28E-02 | 2,81E-01 |

|                        |       |          |          |
|------------------------|-------|----------|----------|
| <i>TUBA8</i>           | -1,16 | 8,29E-02 | 2,81E-01 |
| <i>USP16</i>           | 1,05  | 8,29E-02 | 2,81E-01 |
| <i>JOSD3</i>           | 1,07  | 8,29E-02 | 2,81E-01 |
| <i>BG207267</i>        | 1,10  | 8,29E-02 | 2,81E-01 |
| <i>C9orf6</i>          | -1,07 | 8,29E-02 | 2,81E-01 |
| <i>A_24_P852983</i>    | -1,06 | 8,29E-02 | 2,81E-01 |
| <i>AK092832</i>        | -1,06 | 8,29E-02 | 2,81E-01 |
| <i>FBN3</i>            | 1,06  | 8,29E-02 | 2,81E-01 |
| <i>SEMA4B</i>          | 1,08  | 8,30E-02 | 2,81E-01 |
| <i>PCGF3</i>           | -1,07 | 8,30E-02 | 2,81E-01 |
| <i>IPP</i>             | -1,08 | 8,30E-02 | 2,81E-01 |
| <i>ICA1</i>            | 1,12  | 8,30E-02 | 2,82E-01 |
| <i>THC2405262</i>      | -1,06 | 8,31E-02 | 2,82E-01 |
| <i>AK098548</i>        | 1,08  | 8,30E-02 | 2,82E-01 |
| <i>IER2</i>            | 1,35  | 8,30E-02 | 2,82E-01 |
| <i>FLJ12616</i>        | 1,06  | 8,31E-02 | 2,82E-01 |
| <i>A_32_P5628</i>      | -1,10 | 8,31E-02 | 2,82E-01 |
| <i>CST2</i>            | 1,08  | 8,32E-02 | 2,82E-01 |
| <i>A_24_P15083</i>     | -1,06 | 8,32E-02 | 2,82E-01 |
| <i>AK130644</i>        | -1,14 | 8,32E-02 | 2,82E-01 |
| <i>ENST00000332127</i> | 1,14  | 8,32E-02 | 2,82E-01 |
| <i>PTGIR</i>           | 1,14  | 8,33E-02 | 2,82E-01 |
| <i>THC2436072</i>      | -1,08 | 8,34E-02 | 2,82E-01 |
| <i>HCFC1</i>           | -1,07 | 8,34E-02 | 2,82E-01 |
| <i>ACOX2</i>           | -1,09 | 8,34E-02 | 2,82E-01 |
| <i>AK127004</i>        | 1,15  | 8,34E-02 | 2,82E-01 |
| <i>MOSC1</i>           | -1,10 | 8,35E-02 | 2,83E-01 |
| <i>A_24_P375510</i>    | 1,06  | 8,35E-02 | 2,83E-01 |
| <i>ARHGEF3</i>         | 1,10  | 8,35E-02 | 2,83E-01 |
| <i>HTR2B</i>           | -1,24 | 8,35E-02 | 2,83E-01 |
| <i>CA311162</i>        | -1,10 | 8,36E-02 | 2,83E-01 |
| <i>AK090803</i>        | -1,14 | 8,36E-02 | 2,83E-01 |
| <i>BC014369</i>        | 1,08  | 8,36E-02 | 2,83E-01 |
| <i>AFF2</i>            | 1,10  | 8,36E-02 | 2,83E-01 |
| <i>BU173515</i>        | -1,08 | 8,37E-02 | 2,83E-01 |
| <i>EPB41L3</i>         | 1,12  | 8,37E-02 | 2,83E-01 |
| <i>AW079854</i>        | 1,06  | 8,37E-02 | 2,83E-01 |
| <i>AK098372</i>        | 1,07  | 8,37E-02 | 2,83E-01 |
| <i>PPP1R12B</i>        | 1,25  | 8,37E-02 | 2,83E-01 |
| <i>TNNI2</i>           | -1,14 | 8,37E-02 | 2,83E-01 |
| <i>AK021554</i>        | -1,10 | 8,37E-02 | 2,83E-01 |
| <i>A_24_P936051</i>    | -1,07 | 8,37E-02 | 2,83E-01 |
| <i>SHFM1</i>           | 1,06  | 8,37E-02 | 2,83E-01 |
| <i>FGF22</i>           | 1,08  | 8,38E-02 | 2,83E-01 |

|                        |       |          |          |
|------------------------|-------|----------|----------|
| <i>CDK6</i>            | 1,15  | 8,38E-02 | 2,83E-01 |
| <i>A_32_P64025</i>     | -1,09 | 8,38E-02 | 2,83E-01 |
| <i>TBC1D2B</i>         | -1,09 | 8,39E-02 | 2,83E-01 |
| <i>PAQR6</i>           | 1,20  | 8,39E-02 | 2,83E-01 |
| <i>MCM4</i>            | 1,07  | 8,39E-02 | 2,83E-01 |
| <i>TFR2</i>            | 1,06  | 8,40E-02 | 2,83E-01 |
| <i>A_24_P834066</i>    | 1,07  | 8,40E-02 | 2,83E-01 |
| <i>TTC32</i>           | 1,15  | 8,39E-02 | 2,83E-01 |
| <i>GAS7</i>            | -1,14 | 8,40E-02 | 2,84E-01 |
| <i>HNRPR</i>           | -1,06 | 8,40E-02 | 2,84E-01 |
| <i>SERGEF</i>          | 1,08  | 8,40E-02 | 2,84E-01 |
| <i>AK096129</i>        | -1,07 | 8,40E-02 | 2,84E-01 |
| <i>C20orf52</i>        | 1,08  | 8,41E-02 | 2,84E-01 |
| <i>A_24_P118721</i>    | 1,06  | 8,41E-02 | 2,84E-01 |
| <i>BC045163</i>        | -1,08 | 8,41E-02 | 2,84E-01 |
| <i>ECHDC2</i>          | -1,11 | 8,42E-02 | 2,84E-01 |
| <i>THC2340757</i>      | -1,12 | 8,42E-02 | 2,84E-01 |
| <i>Kua-UEV</i>         | 1,06  | 8,42E-02 | 2,84E-01 |
| <i>MCOLN1</i>          | 1,08  | 8,42E-02 | 2,84E-01 |
| <i>THC2330929</i>      | -1,09 | 8,42E-02 | 2,84E-01 |
| <i>P2RY12</i>          | 1,14  | 8,42E-02 | 2,84E-01 |
| <i>TRH</i>             | -1,32 | 8,43E-02 | 2,84E-01 |
| <i>HSD11B2</i>         | -1,29 | 8,43E-02 | 2,84E-01 |
| <i>BE714413</i>        | -1,09 | 8,43E-02 | 2,84E-01 |
| <i>BX538051</i>        | -1,08 | 8,43E-02 | 2,84E-01 |
| <i>RPUSD4</i>          | -1,07 | 8,43E-02 | 2,84E-01 |
| <i>TTC29</i>           | -1,07 | 8,43E-02 | 2,84E-01 |
| <i>CAPN1</i>           | -1,06 | 8,43E-02 | 2,84E-01 |
| <i>RXFP3</i>           | 1,04  | 8,43E-02 | 2,84E-01 |
| <i>GLYCTK</i>          | 1,06  | 8,43E-02 | 2,84E-01 |
| <i>A_24_P910471</i>    | -1,08 | 8,44E-02 | 2,84E-01 |
| <i>VENTX</i>           | -1,10 | 8,45E-02 | 2,84E-01 |
| <i>THC2279305</i>      | -1,10 | 8,45E-02 | 2,85E-01 |
| <i>CR600312</i>        | -1,06 | 8,46E-02 | 2,85E-01 |
| <i>MKRN2</i>           | -1,10 | 8,46E-02 | 2,85E-01 |
| <i>ENST00000379547</i> | -1,09 | 8,46E-02 | 2,85E-01 |
| <i>LOC283588</i>       | -1,08 | 8,46E-02 | 2,85E-01 |
| <i>TSPAN32</i>         | -1,06 | 8,46E-02 | 2,85E-01 |
| <i>GPR78</i>           | 1,14  | 8,46E-02 | 2,85E-01 |
| <i>ZNF22</i>           | -1,07 | 8,47E-02 | 2,85E-01 |
| <i>THC2379531</i>      | -1,07 | 8,47E-02 | 2,85E-01 |
| <i>CR624129</i>        | 1,06  | 8,47E-02 | 2,85E-01 |
| <i>ME2</i>             | 1,09  | 8,47E-02 | 2,85E-01 |
| <i>ZNF19</i>           | -1,08 | 8,47E-02 | 2,85E-01 |

|                        |       |          |          |
|------------------------|-------|----------|----------|
| <i>THC2279402</i>      | -1,41 | 8,48E-02 | 2,85E-01 |
| <i>HSPC268</i>         | -1,08 | 8,48E-02 | 2,85E-01 |
| <i>C20orf28</i>        | 1,08  | 8,47E-02 | 2,85E-01 |
| <i>SNCG</i>            | 1,12  | 8,47E-02 | 2,85E-01 |
| <i>FLNC</i>            | 1,39  | 8,48E-02 | 2,85E-01 |
| <i>GUCA2B</i>          | 1,18  | 8,48E-02 | 2,85E-01 |
| <i>THC2356115</i>      | -1,10 | 8,48E-02 | 2,85E-01 |
| <i>AL577308</i>        | -1,07 | 8,48E-02 | 2,85E-01 |
| <i>A_32_P58029</i>     | -1,10 | 8,49E-02 | 2,85E-01 |
| <i>DBO90170</i>        | -1,06 | 8,49E-02 | 2,85E-01 |
| <i>HS2ST1</i>          | 1,08  | 8,50E-02 | 2,85E-01 |
| <i>THC2321018</i>      | 1,07  | 8,50E-02 | 2,86E-01 |
| <i>LOC222159</i>       | -1,09 | 8,50E-02 | 2,86E-01 |
| <i>THC2279790</i>      | 1,06  | 8,50E-02 | 2,86E-01 |
| <i>RPS27A</i>          | -1,07 | 8,50E-02 | 2,86E-01 |
| <i>SNX3</i>            | -1,07 | 8,50E-02 | 2,86E-01 |
| <i>A_24_P930148</i>    | -1,06 | 8,51E-02 | 2,86E-01 |
| <i>A_32_P20040</i>     | 1,17  | 8,51E-02 | 2,86E-01 |
| <i>ULK4</i>            | 1,09  | 8,51E-02 | 2,86E-01 |
| <i>CTB-1048E9.5</i>    | 1,05  | 8,52E-02 | 2,86E-01 |
| <i>BF435769</i>        | 1,06  | 8,52E-02 | 2,86E-01 |
| <i>GSTM1</i>           | -1,13 | 8,53E-02 | 2,86E-01 |
| <i>CD72</i>            | -1,09 | 8,53E-02 | 2,86E-01 |
| <i>IFT172</i>          | -1,06 | 8,53E-02 | 2,86E-01 |
| <i>CHST4</i>           | -1,05 | 8,53E-02 | 2,86E-01 |
| <i>CHCHD1</i>          | -1,05 | 8,52E-02 | 2,86E-01 |
| <i>SMARCA4</i>         | 1,09  | 8,53E-02 | 2,86E-01 |
| <i>A_24_P367249</i>    | 1,11  | 8,53E-02 | 2,86E-01 |
| <i>DERL3</i>           | -1,25 | 8,53E-02 | 2,86E-01 |
| <i>A_24_P93425</i>     | -1,08 | 8,54E-02 | 2,86E-01 |
| <i>THC2317149</i>      | 1,53  | 8,54E-02 | 2,86E-01 |
| <i>SSPN</i>            | -1,14 | 8,54E-02 | 2,86E-01 |
| <i>FLJ40292</i>        | 1,06  | 8,54E-02 | 2,86E-01 |
| <i>S81335</i>          | 1,06  | 8,54E-02 | 2,86E-01 |
| <i>LOC493754</i>       | 1,07  | 8,54E-02 | 2,86E-01 |
| <i>A_24_P821146</i>    | 1,12  | 8,54E-02 | 2,86E-01 |
| <i>GLRX</i>            | 1,14  | 8,54E-02 | 2,86E-01 |
| <i>ENST00000362001</i> | -1,38 | 8,55E-02 | 2,86E-01 |
| <i>A_24_P400981</i>    | 1,09  | 8,55E-02 | 2,86E-01 |
| <i>A_32_P180185</i>    | -1,10 | 8,55E-02 | 2,86E-01 |
| <i>SF3B1</i>           | -1,09 | 8,55E-02 | 2,86E-01 |
| <i>BF378976</i>        | 1,10  | 8,55E-02 | 2,86E-01 |
| <i>ANKRD17</i>         | 1,07  | 8,56E-02 | 2,86E-01 |
| <i>AMBN</i>            | -1,06 | 8,56E-02 | 2,86E-01 |

|                        |       |          |          |
|------------------------|-------|----------|----------|
| <i>A_24_P853302</i>    | 1,16  | 8,56E-02 | 2,87E-01 |
| <i>PCDH12</i>          | 1,10  | 8,57E-02 | 2,87E-01 |
| <i>ZNF146</i>          | -1,07 | 8,57E-02 | 2,87E-01 |
| <i>MAST2</i>           | -1,08 | 8,57E-02 | 2,87E-01 |
| <i>THC2316072</i>      | -1,07 | 8,58E-02 | 2,87E-01 |
| <i>FLJ32312</i>        | -1,05 | 8,58E-02 | 2,87E-01 |
| <i>SKIV2L</i>          | 1,06  | 8,58E-02 | 2,87E-01 |
| <i>PHF7</i>            | 1,08  | 8,58E-02 | 2,87E-01 |
| <i>LOC285047</i>       | -1,11 | 8,59E-02 | 2,87E-01 |
| <i>DPF2</i>            | -1,14 | 8,60E-02 | 2,88E-01 |
| <i>PFN2</i>            | -1,13 | 8,60E-02 | 2,88E-01 |
| <i>NPHS1</i>           | 1,07  | 8,60E-02 | 2,88E-01 |
| <i>C9orf102</i>        | 1,05  | 8,61E-02 | 2,88E-01 |
| <i>ENST00000371372</i> | -1,22 | 8,61E-02 | 2,88E-01 |
| <i>ZNF597</i>          | 1,06  | 8,61E-02 | 2,88E-01 |
| <i>GDF6</i>            | 1,09  | 8,61E-02 | 2,88E-01 |
| <i>DNMT3B</i>          | -1,10 | 8,62E-02 | 2,88E-01 |
| <i>RNF14</i>           | 1,05  | 8,62E-02 | 2,88E-01 |
| <i>AI752947</i>        | 1,07  | 8,62E-02 | 2,88E-01 |
| <i>TTC5</i>            | -1,08 | 8,62E-02 | 2,88E-01 |
| <i>AB209345</i>        | 1,09  | 8,62E-02 | 2,88E-01 |
| <i>CAMK1G</i>          | -1,11 | 8,63E-02 | 2,88E-01 |
| <i>DSCAML1</i>         | -1,18 | 8,63E-02 | 2,88E-01 |
| <i>BU732811</i>        | -1,08 | 8,63E-02 | 2,88E-01 |
| <i>NSMCE1</i>          | 1,06  | 8,63E-02 | 2,88E-01 |
| <i>ENST00000374717</i> | 1,08  | 8,63E-02 | 2,88E-01 |
| <i>THC2316088</i>      | 1,06  | 8,64E-02 | 2,88E-01 |
| <i>NKPD1</i>           | 1,07  | 8,64E-02 | 2,88E-01 |
| <i>A_24_P923510</i>    | 1,12  | 8,64E-02 | 2,88E-01 |
| <i>THC2304870</i>      | 1,16  | 8,64E-02 | 2,88E-01 |
| <i>DKFZP434A0131</i>   | -1,10 | 8,64E-02 | 2,88E-01 |
| <i>THC2442400</i>      | -1,18 | 8,65E-02 | 2,89E-01 |
| <i>AK127966</i>        | 1,07  | 8,65E-02 | 2,89E-01 |
| <i>RPS21</i>           | -1,06 | 8,66E-02 | 2,89E-01 |
| <i>ZNF509</i>          | -1,11 | 8,67E-02 | 2,89E-01 |
| <i>TMEM60</i>          | -1,11 | 8,67E-02 | 2,89E-01 |
| <i>TCFL5</i>           | -1,09 | 8,67E-02 | 2,89E-01 |
| <i>THC2449329</i>      | -1,08 | 8,67E-02 | 2,89E-01 |
| <i>PEX1</i>            | -1,06 | 8,67E-02 | 2,89E-01 |
| <i>AI580662</i>        | 1,06  | 8,67E-02 | 2,89E-01 |
| <i>AK094323</i>        | 1,08  | 8,67E-02 | 2,89E-01 |
| <i>LOC285513</i>       | 1,09  | 8,67E-02 | 2,89E-01 |
| <i>UBXD2</i>           | 1,11  | 8,67E-02 | 2,89E-01 |
| <i>RPL28</i>           | -1,06 | 8,67E-02 | 2,89E-01 |

|                        |       |          |          |
|------------------------|-------|----------|----------|
| <i>D89937</i>          | -1,07 | 8,68E-02 | 2,89E-01 |
| <i>AA635126</i>        | -1,07 | 8,68E-02 | 2,89E-01 |
| <i>LOC257407</i>       | 1,06  | 8,68E-02 | 2,89E-01 |
| <i>MFGE8</i>           | 1,11  | 8,68E-02 | 2,89E-01 |
| <i>SULT1A2</i>         | -1,19 | 8,68E-02 | 2,89E-01 |
| <i>RABL3</i>           | 1,05  | 8,69E-02 | 2,89E-01 |
| <i>LEF1</i>            | -1,26 | 8,69E-02 | 2,89E-01 |
| <i>MYO9A</i>           | -1,05 | 8,69E-02 | 2,89E-01 |
| <i>RAB11FIP5</i>       | 1,06  | 8,69E-02 | 2,89E-01 |
| <i>AW797858</i>        | -1,14 | 8,70E-02 | 2,89E-01 |
| <i>FLJ36070</i>        | 1,06  | 8,70E-02 | 2,89E-01 |
| <i>SCN9A</i>           | 1,08  | 8,71E-02 | 2,90E-01 |
| <i>IL20</i>            | 1,15  | 8,71E-02 | 2,90E-01 |
| <i>AK056055</i>        | 1,09  | 8,71E-02 | 2,90E-01 |
| <i>LANCL3</i>          | 1,07  | 8,71E-02 | 2,90E-01 |
| <i>LYPLA3</i>          | -1,05 | 8,71E-02 | 2,90E-01 |
| <i>A_32_P147395</i>    | -1,14 | 8,71E-02 | 2,90E-01 |
| <i>HB-1</i>            | 1,08  | 8,72E-02 | 2,90E-01 |
| <i>ENST00000381889</i> | -1,06 | 8,72E-02 | 2,90E-01 |
| <i>VTI1B</i>           | 1,06  | 8,72E-02 | 2,90E-01 |
| <i>KLF1</i>            | 1,05  | 8,72E-02 | 2,90E-01 |
| <i>SPIN1</i>           | 1,06  | 8,73E-02 | 2,90E-01 |
| <i>TNNT1</i>           | -1,10 | 8,74E-02 | 2,90E-01 |
| <i>C6orf10</i>         | -1,07 | 8,74E-02 | 2,90E-01 |
| <i>AF118092</i>        | 1,07  | 8,74E-02 | 2,90E-01 |
| <i>NAT6</i>            | -1,06 | 8,75E-02 | 2,91E-01 |
| <i>KRTAP2-1</i>        | 1,06  | 8,75E-02 | 2,91E-01 |
| <i>A_24_P773958</i>    | -1,11 | 8,75E-02 | 2,91E-01 |
| <i>U87972</i>          | 1,05  | 8,75E-02 | 2,91E-01 |
| <i>KIAA0427</i>        | 1,09  | 8,75E-02 | 2,91E-01 |
| <i>ASNA1</i>           | 1,07  | 8,76E-02 | 2,91E-01 |
| <i>BMPR1A</i>          | 1,10  | 8,76E-02 | 2,91E-01 |
| <i>NCLN</i>            | -1,07 | 8,76E-02 | 2,91E-01 |
| <i>ZMAT2</i>           | 1,06  | 8,76E-02 | 2,91E-01 |
| <i>RIC8B</i>           | -1,07 | 8,76E-02 | 2,91E-01 |
| <i>KLHL12</i>          | -1,06 | 8,77E-02 | 2,91E-01 |
| <i>GPR75</i>           | -1,08 | 8,77E-02 | 2,91E-01 |
| <i>AK057198</i>        | 1,07  | 8,78E-02 | 2,91E-01 |
| <i>A_23_P96035</i>     | 1,08  | 8,78E-02 | 2,91E-01 |
| <i>ZCCHC13</i>         | 1,09  | 8,78E-02 | 2,91E-01 |
| <i>HBE1</i>            | 1,04  | 8,78E-02 | 2,91E-01 |
| <i>BC017945</i>        | -1,09 | 8,78E-02 | 2,91E-01 |
| <i>LOC122867</i>       | 1,07  | 8,79E-02 | 2,91E-01 |
| <i>TMPRSS2</i>         | -1,09 | 8,79E-02 | 2,92E-01 |

|                        |       |          |          |
|------------------------|-------|----------|----------|
| <i>ENST00000356730</i> | 1,07  | 8,79E-02 | 2,92E-01 |
| <i>CTF8</i>            | -1,07 | 8,80E-02 | 2,92E-01 |
| <i>HMG20B</i>          | 1,06  | 8,80E-02 | 2,92E-01 |
| <i>LGI2</i>            | -1,22 | 8,80E-02 | 2,92E-01 |
| <i>PKIA</i>            | 1,12  | 8,80E-02 | 2,92E-01 |
| <i>A_32_P86494</i>     | -1,06 | 8,81E-02 | 2,92E-01 |
| <i>ENST00000361761</i> | -1,06 | 8,81E-02 | 2,92E-01 |
| <i>LOC388965</i>       | 1,05  | 8,82E-02 | 2,92E-01 |
| <i>THC2265453</i>      | 1,05  | 8,82E-02 | 2,92E-01 |
| <i>TDRD7</i>           | 1,10  | 8,82E-02 | 2,92E-01 |
| <i>GRID2</i>           | 1,20  | 8,81E-02 | 2,92E-01 |
| <i>GBL</i>             | 1,06  | 8,82E-02 | 2,92E-01 |
| <i>SLC17A2</i>         | 1,08  | 8,82E-02 | 2,92E-01 |
| <i>THC2341407</i>      | -1,09 | 8,83E-02 | 2,92E-01 |
| <i>LOC654350</i>       | -1,06 | 8,83E-02 | 2,92E-01 |
| <i>FBXO28</i>          | 1,08  | 8,83E-02 | 2,92E-01 |
| <i>THC2314600</i>      | -1,13 | 8,83E-02 | 2,92E-01 |
| <i>SLC16A5</i>         | -1,07 | 8,83E-02 | 2,92E-01 |
| <i>FANCA</i>           | -1,04 | 8,83E-02 | 2,92E-01 |
| <i>PARP9</i>           | -1,10 | 8,84E-02 | 2,92E-01 |
| <i>A_23_P12373</i>     | 1,08  | 8,84E-02 | 2,92E-01 |
| <i>A_32_P33434</i>     | 1,08  | 8,85E-02 | 2,93E-01 |
| <i>LMBRD2</i>          | 1,05  | 8,85E-02 | 2,93E-01 |
| <i>A_24_P921390</i>    | 1,08  | 8,86E-02 | 2,93E-01 |
| <i>AKO26984</i>        | -1,13 | 8,86E-02 | 2,93E-01 |
| <i>ENST00000361267</i> | -1,05 | 8,86E-02 | 2,93E-01 |
| <i>DNAH1</i>           | -1,04 | 8,86E-02 | 2,93E-01 |
| <i>CR616058</i>        | 1,08  | 8,86E-02 | 2,93E-01 |
| <i>BRMS1L</i>          | 1,07  | 8,87E-02 | 2,93E-01 |
| <i>TSLP</i>            | 1,21  | 8,87E-02 | 2,93E-01 |
| <i>ZNF580</i>          | -1,11 | 8,88E-02 | 2,93E-01 |
| <i>POLR3F</i>          | -1,08 | 8,89E-02 | 2,93E-01 |
| <i>MOGAT3</i>          | 1,05  | 8,88E-02 | 2,93E-01 |
| <i>A_23_P317548</i>    | 1,07  | 8,88E-02 | 2,93E-01 |
| <i>BCO11998</i>        | 1,07  | 8,88E-02 | 2,93E-01 |
| <i>THC2345565</i>      | 1,10  | 8,88E-02 | 2,93E-01 |
| <i>PPP1R12A</i>        | 1,15  | 8,88E-02 | 2,93E-01 |
| <i>MRPL19</i>          | -1,07 | 8,89E-02 | 2,93E-01 |
| <i>BAMBI</i>           | -1,24 | 8,89E-02 | 2,94E-01 |
| <i>MIER3</i>           | 1,07  | 8,89E-02 | 2,94E-01 |
| <i>POLR2E</i>          | 1,05  | 8,90E-02 | 2,94E-01 |
| <i>HLA-DMB</i>         | -1,13 | 8,91E-02 | 2,94E-01 |
| <i>PDZK1</i>           | -1,12 | 8,91E-02 | 2,94E-01 |
| <i>KNDC1</i>           | -1,10 | 8,90E-02 | 2,94E-01 |

|                        |       |          |          |
|------------------------|-------|----------|----------|
| <i>C20orf30</i>        | -1,07 | 8,90E-02 | 2,94E-01 |
| <i>WDFY3</i>           | -1,06 | 8,90E-02 | 2,94E-01 |
| <i>A_32_P15581</i>     | 1,06  | 8,90E-02 | 2,94E-01 |
| <i>ZNF674</i>          | 1,06  | 8,90E-02 | 2,94E-01 |
| <i>FBXO21</i>          | -1,08 | 8,91E-02 | 2,94E-01 |
| <i>CYLN2</i>           | 1,06  | 8,91E-02 | 2,94E-01 |
| <i>A_24_P941070</i>    | 1,07  | 8,91E-02 | 2,94E-01 |
| <i>MGC9850</i>         | -1,08 | 8,92E-02 | 2,94E-01 |
| <i>LOC642668</i>       | 1,08  | 8,92E-02 | 2,94E-01 |
| <i>A_24_P458095</i>    | -1,08 | 8,92E-02 | 2,94E-01 |
| <i>AK095436</i>        | -1,05 | 8,93E-02 | 2,94E-01 |
| <i>OR2A20P</i>         | -1,09 | 8,94E-02 | 2,94E-01 |
| <i>LSM6</i>            | -1,08 | 8,94E-02 | 2,94E-01 |
| <i>ENST00000263284</i> | 1,05  | 8,93E-02 | 2,94E-01 |
| <i>PABPC1</i>          | 1,06  | 8,94E-02 | 2,94E-01 |
| <i>BC032874</i>        | 1,08  | 8,94E-02 | 2,94E-01 |
| <i>A_24_P596251</i>    | 1,22  | 8,93E-02 | 2,94E-01 |
| <i>ALG1</i>            | -1,06 | 8,94E-02 | 2,95E-01 |
| <i>EML2</i>            | 1,08  | 8,94E-02 | 2,95E-01 |
| <i>OSTF1</i>           | 1,09  | 8,94E-02 | 2,95E-01 |
| <i>NDEL1</i>           | 1,07  | 8,95E-02 | 2,95E-01 |
| <i>LOC645287</i>       | -1,09 | 8,95E-02 | 2,95E-01 |
| <i>CABIN1</i>          | 1,08  | 8,95E-02 | 2,95E-01 |
| <i>ZNF491</i>          | -1,08 | 8,96E-02 | 2,95E-01 |
| <i>C16orf75</i>        | -1,23 | 8,96E-02 | 2,95E-01 |
| <i>ALKBH2</i>          | -1,07 | 8,96E-02 | 2,95E-01 |
| <i>DMXL1</i>           | -1,09 | 8,97E-02 | 2,95E-01 |
| <i>RXFP4</i>           | 1,07  | 8,97E-02 | 2,95E-01 |
| <i>LOC130940</i>       | -1,09 | 8,97E-02 | 2,95E-01 |
| <i>TAF6</i>            | -1,07 | 8,99E-02 | 2,96E-01 |
| <i>LOC494150</i>       | -1,06 | 8,99E-02 | 2,96E-01 |
| <i>DKFZp667M2411</i>   | -1,06 | 8,99E-02 | 2,96E-01 |
| <i>HPRT1</i>           | 1,09  | 8,99E-02 | 2,96E-01 |
| <i>DNAJB1</i>          | 1,11  | 8,99E-02 | 2,96E-01 |
| <i>UCP3</i>            | 1,12  | 8,99E-02 | 2,96E-01 |
| <i>UCN</i>             | 1,07  | 9,00E-02 | 2,96E-01 |
| <i>AK057652</i>        | -1,10 | 9,00E-02 | 2,96E-01 |
| <i>TRPM1</i>           | 1,08  | 9,00E-02 | 2,96E-01 |
| <i>AK095727</i>        | -1,06 | 9,01E-02 | 2,96E-01 |
| <i>LOC112703</i>       | 1,19  | 9,01E-02 | 2,96E-01 |
| <i>THC2292718</i>      | 1,08  | 9,01E-02 | 2,96E-01 |
| <i>AF062385</i>        | -1,08 | 9,02E-02 | 2,96E-01 |
| <i>C20orf51</i>        | 1,06  | 9,02E-02 | 2,96E-01 |
| <i>ZFYVE21</i>         | -1,09 | 9,02E-02 | 2,96E-01 |



|                        |       |          |          |
|------------------------|-------|----------|----------|
| <i>THEM5</i>           | 1,11  | 9,03E-02 | 2,96E-01 |
| <i>PAK3</i>            | -1,14 | 9,03E-02 | 2,97E-01 |
| <i>CYHR1</i>           | -1,08 | 9,03E-02 | 2,97E-01 |
| <i>OBFC2A</i>          | 1,18  | 9,03E-02 | 2,97E-01 |
| <i>AK055921</i>        | -1,11 | 9,04E-02 | 2,97E-01 |
| <i>DA372386</i>        | -1,06 | 9,04E-02 | 2,97E-01 |
| <i>THC2280944</i>      | 1,07  | 9,04E-02 | 2,97E-01 |
| <i>LOC401588</i>       | -1,10 | 9,04E-02 | 2,97E-01 |
| <i>COL19A1</i>         | 1,36  | 9,04E-02 | 2,97E-01 |
| <i>SAFB</i>            | 1,06  | 9,05E-02 | 2,97E-01 |
| <i>ENST00000262646</i> | -1,12 | 9,05E-02 | 2,97E-01 |
| <i>MRPS26</i>          | -1,09 | 9,05E-02 | 2,97E-01 |
| <i>A_24_P489976</i>    | -1,06 | 9,06E-02 | 2,97E-01 |
| <i>REV1L</i>           | 1,06  | 9,06E-02 | 2,97E-01 |
| <i>ZNF469</i>          | -1,23 | 9,07E-02 | 2,97E-01 |
| <i>ZNF302</i>          | -1,08 | 9,06E-02 | 2,97E-01 |
| <i>S80931</i>          | 1,06  | 9,06E-02 | 2,97E-01 |
| <i>ECOP</i>            | 1,06  | 9,06E-02 | 2,97E-01 |
| <i>AK026155</i>        | 1,07  | 9,06E-02 | 2,97E-01 |
| <i>AK097587</i>        | 1,13  | 9,07E-02 | 2,97E-01 |
| <i>DKFZp686l1569</i>   | -1,09 | 9,07E-02 | 2,97E-01 |
| <i>AK026502</i>        | -1,06 | 9,07E-02 | 2,97E-01 |
| <i>HLA-G</i>           | -1,08 | 9,07E-02 | 2,97E-01 |
| <i>RARRES1</i>         | -1,31 | 9,08E-02 | 2,97E-01 |
| <i>LOC644242</i>       | -1,06 | 9,08E-02 | 2,97E-01 |
| <i>THC2434479</i>      | 1,07  | 9,08E-02 | 2,97E-01 |
| <i>BC002570</i>        | 1,09  | 9,08E-02 | 2,97E-01 |
| <i>POLR2G</i>          | -1,05 | 9,09E-02 | 2,98E-01 |
| <i>ENST00000288676</i> | -1,13 | 9,09E-02 | 2,98E-01 |
| <i>SGPL1</i>           | -1,06 | 9,09E-02 | 2,98E-01 |
| <i>DYDC1</i>           | 1,06  | 9,09E-02 | 2,98E-01 |
| <i>ADAMTS10</i>        | 1,13  | 9,09E-02 | 2,98E-01 |
| <i>A_24_P370484</i>    | 1,18  | 9,09E-02 | 2,98E-01 |
| <i>CD22</i>            | -1,09 | 9,10E-02 | 2,98E-01 |
| <i>JARID2</i>          | 1,06  | 9,10E-02 | 2,98E-01 |
| <i>CAMTA2</i>          | 1,07  | 9,10E-02 | 2,98E-01 |
| <i>BC073929</i>        | -1,28 | 9,11E-02 | 2,98E-01 |
| <i>QPCTL</i>           | -1,06 | 9,10E-02 | 2,98E-01 |
| <i>AK095945</i>        | 1,07  | 9,11E-02 | 2,98E-01 |
| <i>THC2317808</i>      | 1,15  | 9,11E-02 | 2,98E-01 |
| <i>TPMT</i>            | 1,06  | 9,12E-02 | 2,98E-01 |
| <i>ZNF264</i>          | -1,06 | 9,12E-02 | 2,98E-01 |
| <i>AK056401</i>        | -1,21 | 9,13E-02 | 2,99E-01 |
| <i>C22orf27</i>        | -1,09 | 9,13E-02 | 2,99E-01 |

|                 |       |          |          |
|-----------------|-------|----------|----------|
| MGRN1           | -1,07 | 9,13E-02 | 2,99E-01 |
| ENST00000298129 | 1,06  | 9,14E-02 | 2,99E-01 |
| CDH24           | 1,07  | 9,14E-02 | 2,99E-01 |
| SDCCAG1         | -1,05 | 9,14E-02 | 2,99E-01 |
| TSN             | -1,07 | 9,14E-02 | 2,99E-01 |
| ENST00000379900 | 1,07  | 9,14E-02 | 2,99E-01 |
| ENST00000320547 | -1,09 | 9,15E-02 | 2,99E-01 |
| ENST00000380020 | -1,06 | 9,15E-02 | 2,99E-01 |
| YBX2            | -1,17 | 9,15E-02 | 2,99E-01 |
| ENST00000357491 | -1,16 | 9,16E-02 | 2,99E-01 |
| LOC92154        | 1,06  | 9,15E-02 | 2,99E-01 |
| A_24_P281853    | 1,12  | 9,15E-02 | 2,99E-01 |
| GSTM3           | -1,12 | 9,16E-02 | 2,99E-01 |
| DRD4            | 1,07  | 9,17E-02 | 2,99E-01 |
| PDE4A           | -1,06 | 9,17E-02 | 2,99E-01 |
| A_24_P873801    | 1,10  | 9,17E-02 | 2,99E-01 |
| LILRP2          | 1,05  | 9,17E-02 | 2,99E-01 |
| THC2404058      | -1,18 | 9,17E-02 | 2,99E-01 |
| DAMS            | -1,07 | 9,17E-02 | 2,99E-01 |
| SETD4           | -1,07 | 9,18E-02 | 2,99E-01 |
| AFP             | 1,07  | 9,18E-02 | 2,99E-01 |
| A_23_P210297    | 1,10  | 9,18E-02 | 2,99E-01 |
| CB242429        | -1,07 | 9,19E-02 | 3,00E-01 |
| RWDD1           | 1,06  | 9,19E-02 | 3,00E-01 |
| PRO1596         | -1,06 | 9,19E-02 | 3,00E-01 |
| TAX1BP1         | 1,06  | 9,20E-02 | 3,00E-01 |
| A_24_P221928    | 1,14  | 9,19E-02 | 3,00E-01 |
| GNAI2           | 1,07  | 9,20E-02 | 3,00E-01 |
| TMCC3           | -1,08 | 9,20E-02 | 3,00E-01 |
| A_24_P821693    | -1,10 | 9,20E-02 | 3,00E-01 |
| A_32_P16931     | -1,09 | 9,20E-02 | 3,00E-01 |
| BARHL1          | 1,04  | 9,20E-02 | 3,00E-01 |
| ENST00000284894 | 1,10  | 9,21E-02 | 3,00E-01 |
| LOC284542       | 1,13  | 9,21E-02 | 3,00E-01 |
| TMEM142B        | -1,11 | 9,21E-02 | 3,00E-01 |
| BC002534        | 1,07  | 9,21E-02 | 3,00E-01 |
| MXRA5           | 1,51  | 9,21E-02 | 3,00E-01 |
| RSNL2           | -1,12 | 9,22E-02 | 3,00E-01 |
| BC019715        | -1,09 | 9,22E-02 | 3,00E-01 |
| MOBKL2A         | -1,07 | 9,22E-02 | 3,00E-01 |
| ENST00000383723 | -1,05 | 9,22E-02 | 3,00E-01 |
| A_32_P51714     | 1,06  | 9,22E-02 | 3,00E-01 |
| A_24_P924230    | 1,08  | 9,22E-02 | 3,00E-01 |
| JMJD1B          | -1,08 | 9,23E-02 | 3,00E-01 |

|                        |       |          |          |
|------------------------|-------|----------|----------|
| <i>AK094846</i>        | -1,08 | 9,23E-02 | 3,00E-01 |
| <i>CCR9</i>            | -1,07 | 9,23E-02 | 3,00E-01 |
| <i>GLT8D3</i>          | 1,08  | 9,23E-02 | 3,00E-01 |
| <i>EID3</i>            | 1,09  | 9,23E-02 | 3,00E-01 |
| <i>ACADS</i>           | 1,06  | 9,23E-02 | 3,00E-01 |
| <i>BTLA</i>            | -1,07 | 9,23E-02 | 3,00E-01 |
| <i>THC2328806</i>      | -1,14 | 9,24E-02 | 3,00E-01 |
| <i>TLL10</i>           | -1,07 | 9,24E-02 | 3,00E-01 |
| <i>AL359062</i>        | 1,44  | 9,24E-02 | 3,00E-01 |
| <i>EPB42</i>           | 1,11  | 9,24E-02 | 3,01E-01 |
| <i>CN418636</i>        | 1,07  | 9,25E-02 | 3,01E-01 |
| <i>GABRA3</i>          | 1,10  | 9,25E-02 | 3,01E-01 |
| <i>GFER</i>            | 1,07  | 9,25E-02 | 3,01E-01 |
| <i>A_32_P119165</i>    | 1,08  | 9,25E-02 | 3,01E-01 |
| <i>SHC3</i>            | -1,16 | 9,26E-02 | 3,01E-01 |
| <i>A_32_P198223</i>    | -1,12 | 9,26E-02 | 3,01E-01 |
| <i>THC2330484</i>      | -1,09 | 9,26E-02 | 3,01E-01 |
| <i>A_24_P933059</i>    | -1,09 | 9,26E-02 | 3,01E-01 |
| <i>CR609307</i>        | -1,06 | 9,26E-02 | 3,01E-01 |
| <i>COL5A1</i>          | -1,25 | 9,26E-02 | 3,01E-01 |
| <i>AA884902</i>        | 1,07  | 9,27E-02 | 3,01E-01 |
| <i>EXOSC8</i>          | -1,05 | 9,27E-02 | 3,01E-01 |
| <i>THC2303951</i>      | 1,06  | 9,27E-02 | 3,01E-01 |
| <i>A_24_P932220</i>    | 1,08  | 9,27E-02 | 3,01E-01 |
| <i>PCOLCE2</i>         | 1,29  | 9,27E-02 | 3,01E-01 |
| <i>CCL19</i>           | -1,55 | 9,28E-02 | 3,01E-01 |
| <i>CNFN</i>            | -1,31 | 9,28E-02 | 3,01E-01 |
| <i>BTBD12</i>          | -1,07 | 9,28E-02 | 3,01E-01 |
| <i>AK094155</i>        | -1,08 | 9,28E-02 | 3,01E-01 |
| <i>NR2C1</i>           | -1,06 | 9,28E-02 | 3,01E-01 |
| <i>AL109695</i>        | 1,11  | 9,28E-02 | 3,01E-01 |
| <i>ENST00000379877</i> | -1,16 | 9,29E-02 | 3,01E-01 |
| <i>FAM92A3</i>         | -1,08 | 9,29E-02 | 3,01E-01 |
| <i>TREML4</i>          | 1,07  | 9,28E-02 | 3,01E-01 |
| <i>PSMB6</i>           | 1,06  | 9,29E-02 | 3,01E-01 |
| <i>S100A6</i>          | 1,08  | 9,29E-02 | 3,01E-01 |
| <i>GFM1</i>            | 1,10  | 9,29E-02 | 3,01E-01 |
| <i>ZNF714</i>          | -1,12 | 9,30E-02 | 3,01E-01 |
| <i>P18SRP</i>          | 1,06  | 9,30E-02 | 3,01E-01 |
| <i>AF090898</i>        | 1,06  | 9,30E-02 | 3,01E-01 |
| <i>A_32_P181107</i>    | -1,10 | 9,31E-02 | 3,02E-01 |
| <i>RAB14</i>           | -1,04 | 9,31E-02 | 3,02E-01 |
| <i>MAP3K11</i>         | 1,09  | 9,31E-02 | 3,02E-01 |
| <i>ENST00000357979</i> | -1,07 | 9,31E-02 | 3,02E-01 |

|                        |       |          |          |
|------------------------|-------|----------|----------|
| <i>AK097109</i>        | -1,06 | 9,32E-02 | 3,02E-01 |
| <i>NIPSNAP3B</i>       | -1,08 | 9,32E-02 | 3,02E-01 |
| <i>GPC5</i>            | -1,07 | 9,32E-02 | 3,02E-01 |
| <i>BC017893</i>        | -1,07 | 9,33E-02 | 3,02E-01 |
| <i>A_24_P926734</i>    | -1,06 | 9,33E-02 | 3,02E-01 |
| <i>A_32_P16989</i>     | -1,06 | 9,33E-02 | 3,02E-01 |
| <i>Z21831</i>          | -1,05 | 9,32E-02 | 3,02E-01 |
| <i>A_32_P112100</i>    | 1,06  | 9,32E-02 | 3,02E-01 |
| <i>A_24_P650589</i>    | -1,06 | 9,33E-02 | 3,02E-01 |
| <i>TULP4</i>           | 1,08  | 9,34E-02 | 3,02E-01 |
| <i>AL833309</i>        | 1,31  | 9,34E-02 | 3,02E-01 |
| <i>A_24_P747721</i>    | -1,05 | 9,34E-02 | 3,02E-01 |
| <i>PPCS</i>            | -1,06 | 9,34E-02 | 3,02E-01 |
| <i>AK3L2</i>           | 1,14  | 9,34E-02 | 3,02E-01 |
| <i>OASL</i>            | 1,21  | 9,34E-02 | 3,02E-01 |
| <i>BI017499</i>        | -1,10 | 9,35E-02 | 3,02E-01 |
| <i>ZHX1</i>            | -1,09 | 9,35E-02 | 3,02E-01 |
| <i>RPL37</i>           | -1,05 | 9,35E-02 | 3,02E-01 |
| <i>MRPL23</i>          | 1,07  | 9,35E-02 | 3,02E-01 |
| <i>CYP4Z1</i>          | -1,08 | 9,36E-02 | 3,03E-01 |
| <i>MAGI1</i>           | 1,08  | 9,36E-02 | 3,03E-01 |
| <i>LOC644872</i>       | -1,07 | 9,36E-02 | 3,03E-01 |
| <i>DCUN1D5</i>         | 1,06  | 9,36E-02 | 3,03E-01 |
| <i>TBL1X</i>           | -1,17 | 9,37E-02 | 3,03E-01 |
| <i>EMR2</i>            | -1,15 | 9,37E-02 | 3,03E-01 |
| <i>SV2C</i>            | -1,11 | 9,37E-02 | 3,03E-01 |
| <i>C6orf115</i>        | -1,11 | 9,37E-02 | 3,03E-01 |
| <i>AI419867</i>        | -1,06 | 9,38E-02 | 3,03E-01 |
| <i>BIRC1</i>           | -1,22 | 9,38E-02 | 3,03E-01 |
| <i>BG675674</i>        | -1,12 | 9,38E-02 | 3,03E-01 |
| <i>KIAA0409</i>        | -1,08 | 9,38E-02 | 3,03E-01 |
| <i>FUNDC2</i>          | 1,06  | 9,38E-02 | 3,03E-01 |
| <i>PBXIP1</i>          | 1,13  | 9,38E-02 | 3,03E-01 |
| <i>MICALCL</i>         | 1,08  | 9,39E-02 | 3,03E-01 |
| <i>ENST00000327506</i> | 1,05  | 9,39E-02 | 3,03E-01 |
| <i>PLEC1</i>           | 1,07  | 9,39E-02 | 3,03E-01 |
| <i>KIAA1862</i>        | -1,09 | 9,39E-02 | 3,03E-01 |
| <i>OMG</i>             | -1,07 | 9,40E-02 | 3,03E-01 |
| <i>DFNA5</i>           | -1,15 | 9,40E-02 | 3,03E-01 |
| <i>ABHD3</i>           | -1,08 | 9,40E-02 | 3,03E-01 |
| <i>C1orf136</i>        | -1,07 | 9,40E-02 | 3,03E-01 |
| <i>HIVEP1</i>          | 1,09  | 9,40E-02 | 3,03E-01 |
| <i>OGDH</i>            | 1,12  | 9,40E-02 | 3,03E-01 |
| <i>C11orf11</i>        | -1,15 | 9,41E-02 | 3,03E-01 |

|                        |       |          |          |
|------------------------|-------|----------|----------|
| <i>THC2438975</i>      | -1,13 | 9,41E-02 | 3,03E-01 |
| <i>CRYZL1</i>          | -1,10 | 9,41E-02 | 3,03E-01 |
| <i>A_24_P878419</i>    | 1,08  | 9,41E-02 | 3,03E-01 |
| <i>DGCR6L</i>          | 1,06  | 9,41E-02 | 3,03E-01 |
| <i>NANOGP1</i>         | -1,08 | 9,42E-02 | 3,03E-01 |
| <i>LOC90580</i>        | -1,05 | 9,42E-02 | 3,03E-01 |
| <i>C11orf72</i>        | 1,05  | 9,42E-02 | 3,03E-01 |
| <i>SIRPA</i>           | -1,09 | 9,42E-02 | 3,04E-01 |
| <i>AV738929</i>        | -1,09 | 9,42E-02 | 3,04E-01 |
| <i>BCLAF1</i>          | 1,06  | 9,42E-02 | 3,04E-01 |
| <i>TPSG1</i>           | 1,08  | 9,43E-02 | 3,04E-01 |
| <i>AW885990</i>        | -1,10 | 9,43E-02 | 3,04E-01 |
| <i>AK026408</i>        | -1,07 | 9,43E-02 | 3,04E-01 |
| <i>GPR61</i>           | 1,06  | 9,43E-02 | 3,04E-01 |
| <i>THC2438720</i>      | -1,11 | 9,44E-02 | 3,04E-01 |
| <i>PSMB3</i>           | 1,07  | 9,44E-02 | 3,04E-01 |
| <i>ANUBL1</i>          | 1,06  | 9,44E-02 | 3,04E-01 |
| <i>THC2315595</i>      | 1,21  | 9,44E-02 | 3,04E-01 |
| <i>THC2285673</i>      | 1,07  | 9,44E-02 | 3,04E-01 |
| <i>C12orf32</i>        | -1,08 | 9,45E-02 | 3,04E-01 |
| <i>ADAMTS3</i>         | -1,15 | 9,45E-02 | 3,04E-01 |
| <i>LRRC20</i>          | -1,11 | 9,45E-02 | 3,04E-01 |
| <i>GRM5</i>            | 1,06  | 9,45E-02 | 3,04E-01 |
| <i>MRCL3</i>           | 1,07  | 9,45E-02 | 3,04E-01 |
| <i>CPNE8</i>           | 1,07  | 9,45E-02 | 3,04E-01 |
| <i>ATXN10</i>          | -1,07 | 9,46E-02 | 3,04E-01 |
| <i>FBXO36</i>          | -1,06 | 9,47E-02 | 3,04E-01 |
| <i>ENST00000349014</i> | -1,06 | 9,47E-02 | 3,04E-01 |
| <i>BC000228</i>        | 1,09  | 9,47E-02 | 3,05E-01 |
| <i>MAN1B1</i>          | 1,08  | 9,48E-02 | 3,05E-01 |
| <i>THC2358048</i>      | -1,09 | 9,49E-02 | 3,05E-01 |
| <i>OR7E13P</i>         | 1,06  | 9,49E-02 | 3,05E-01 |
| <i>CYP11B1</i>         | 1,06  | 9,49E-02 | 3,05E-01 |
| <i>A_23_P170551</i>    | 1,10  | 9,49E-02 | 3,05E-01 |
| <i>DBNDD1</i>          | 1,11  | 9,49E-02 | 3,05E-01 |
| <i>BC030138</i>        | -1,11 | 9,50E-02 | 3,05E-01 |
| <i>EPHB1</i>           | -1,16 | 9,50E-02 | 3,05E-01 |
| <i>MRPL35</i>          | -1,07 | 9,50E-02 | 3,05E-01 |
| <i>PKN2</i>            | 1,06  | 9,50E-02 | 3,05E-01 |
| <i>A_32_P185718</i>    | 1,07  | 9,50E-02 | 3,05E-01 |
| <i>MORC1</i>           | 1,06  | 9,50E-02 | 3,05E-01 |
| <i>TPX2</i>            | 1,11  | 9,51E-02 | 3,05E-01 |
| <i>LOC643513</i>       | 1,10  | 9,51E-02 | 3,05E-01 |
| <i>ASPN</i>            | 1,21  | 9,51E-02 | 3,05E-01 |

|                        |       |          |          |
|------------------------|-------|----------|----------|
| <i>RPS3</i>            | -1,06 | 9,52E-02 | 3,05E-01 |
| <i>A_23_P126328</i>    | 1,05  | 9,51E-02 | 3,05E-01 |
| <i>PPME1</i>           | 1,07  | 9,51E-02 | 3,05E-01 |
| <i>EIF3S12</i>         | 1,04  | 9,53E-02 | 3,06E-01 |
| <i>LILRA1</i>          | 1,07  | 9,53E-02 | 3,06E-01 |
| <i>ENST00000324988</i> | 1,06  | 9,54E-02 | 3,06E-01 |
| <i>RPH3AL</i>          | 1,17  | 9,54E-02 | 3,06E-01 |
| <i>METAP1</i>          | -1,08 | 9,54E-02 | 3,06E-01 |
| <i>DDX6</i>            | 1,09  | 9,54E-02 | 3,06E-01 |
| <i>THC2269344</i>      | 1,07  | 9,54E-02 | 3,06E-01 |
| <i>CLDN9</i>           | 1,05  | 9,55E-02 | 3,06E-01 |
| <i>KCNJ6</i>           | 1,06  | 9,55E-02 | 3,06E-01 |
| <i>SLC17A4</i>         | 1,10  | 9,55E-02 | 3,06E-01 |
| <i>A_32_P208964</i>    | -1,09 | 9,55E-02 | 3,06E-01 |
| <i>C4orf23</i>         | -1,07 | 9,55E-02 | 3,06E-01 |
| <i>TOPORS</i>          | 1,07  | 9,56E-02 | 3,06E-01 |
| <i>CHST3</i>           | 1,11  | 9,56E-02 | 3,06E-01 |
| <i>A_23_P23593</i>     | -1,06 | 9,56E-02 | 3,06E-01 |
| <i>RSRC1</i>           | 1,07  | 9,56E-02 | 3,06E-01 |
| <i>NP102468</i>        | -1,17 | 9,57E-02 | 3,06E-01 |
| <i>LAMB1</i>           | -1,14 | 9,57E-02 | 3,06E-01 |
| <i>RABEPK</i>          | -1,07 | 9,57E-02 | 3,07E-01 |
| <i>CACNG5</i>          | 1,05  | 9,57E-02 | 3,07E-01 |
| <i>MYOD1</i>           | 1,07  | 9,57E-02 | 3,07E-01 |
| <i>ALDH3B1</i>         | 1,07  | 9,57E-02 | 3,07E-01 |
| <i>MX2</i>             | 1,15  | 9,57E-02 | 3,07E-01 |
| <i>STX18</i>           | -1,15 | 9,58E-02 | 3,07E-01 |
| <i>ZPLD1</i>           | 1,05  | 9,58E-02 | 3,07E-01 |
| <i>A_32_P39691</i>     | 1,08  | 9,58E-02 | 3,07E-01 |
| <i>ENST00000322839</i> | 1,21  | 9,58E-02 | 3,07E-01 |
| <i>PARP10</i>          | 1,08  | 9,59E-02 | 3,07E-01 |
| <i>SALL2</i>           | -1,12 | 9,59E-02 | 3,07E-01 |
| <i>ENST00000360638</i> | -1,07 | 9,60E-02 | 3,07E-01 |
| <i>A_24_P84873</i>     | 1,06  | 9,60E-02 | 3,07E-01 |
| <i>VMD2L1</i>          | 1,07  | 9,60E-02 | 3,07E-01 |
| <i>HOXB1</i>           | 1,06  | 9,60E-02 | 3,07E-01 |
| <i>LOC388160</i>       | -1,14 | 9,60E-02 | 3,07E-01 |
| <i>AK097322</i>        | 1,10  | 9,60E-02 | 3,07E-01 |
| <i>KIAA0528</i>        | -1,06 | 9,61E-02 | 3,07E-01 |
| <i>THC2408500</i>      | 1,08  | 9,62E-02 | 3,07E-01 |
| <i>GCLM</i>            | 1,09  | 9,61E-02 | 3,07E-01 |
| <i>A_23_P31563</i>     | 1,08  | 9,62E-02 | 3,08E-01 |
| <i>BE826587</i>        | -1,06 | 9,63E-02 | 3,08E-01 |
| <i>RCCD1</i>           | -1,08 | 9,64E-02 | 3,08E-01 |

|                        |       |          |          |
|------------------------|-------|----------|----------|
| <i>BF213738</i>        | 1,13  | 9,64E-02 | 3,08E-01 |
| <i>NFE2L3</i>          | -1,09 | 9,64E-02 | 3,08E-01 |
| <i>KIAA1545</i>        | 1,09  | 9,64E-02 | 3,08E-01 |
| <i>DHRS7B</i>          | 1,06  | 9,64E-02 | 3,08E-01 |
| <i>SLC22A12</i>        | 1,08  | 9,64E-02 | 3,08E-01 |
| <i>BC031954</i>        | 1,06  | 9,65E-02 | 3,08E-01 |
| <i>GPR77</i>           | 1,06  | 9,66E-02 | 3,08E-01 |
| <i>SYNPR</i>           | 1,07  | 9,66E-02 | 3,08E-01 |
| <i>ADAM30</i>          | 1,04  | 9,67E-02 | 3,09E-01 |
| <i>FAM112A</i>         | 1,07  | 9,67E-02 | 3,09E-01 |
| <i>LOXL3</i>           | 1,07  | 9,67E-02 | 3,09E-01 |
| <i>NELF</i>            | -1,06 | 9,67E-02 | 3,09E-01 |
| <i>BIRC6</i>           | -1,05 | 9,67E-02 | 3,09E-01 |
| <i>EQC</i>             | 1,03  | 9,68E-02 | 3,09E-01 |
| <i>BU687083</i>        | 1,07  | 9,68E-02 | 3,09E-01 |
| <i>BC030757</i>        | -1,11 | 9,68E-02 | 3,09E-01 |
| <i>BAT1</i>            | -1,08 | 9,69E-02 | 3,09E-01 |
| <i>X98562</i>          | 1,06  | 9,69E-02 | 3,09E-01 |
| <i>RGS5</i>            | 1,33  | 9,69E-02 | 3,09E-01 |
| <i>C14orf138</i>       | -1,09 | 9,70E-02 | 3,09E-01 |
| <i>CDH16</i>           | -1,07 | 9,70E-02 | 3,09E-01 |
| <i>LGR6</i>            | 1,25  | 9,70E-02 | 3,09E-01 |
| <i>ENST00000369739</i> | -1,06 | 9,70E-02 | 3,09E-01 |
| <i>A_32_P128399</i>    | -1,15 | 9,70E-02 | 3,09E-01 |
| <i>MATN4</i>           | -1,38 | 9,71E-02 | 3,09E-01 |
| <i>FLJ13576</i>        | -1,10 | 9,71E-02 | 3,09E-01 |
| <i>ATG16L1</i>         | -1,06 | 9,71E-02 | 3,09E-01 |
| <i>GUP1</i>            | -1,14 | 9,72E-02 | 3,10E-01 |
| <i>LOC404266</i>       | 1,06  | 9,72E-02 | 3,10E-01 |
| <i>FLJ32784</i>        | 1,07  | 9,72E-02 | 3,10E-01 |
| <i>RAPH1</i>           | 1,11  | 9,72E-02 | 3,10E-01 |
| <i>DNAJB5</i>          | 1,28  | 9,73E-02 | 3,10E-01 |
| <i>MASA</i>            | -1,11 | 9,73E-02 | 3,10E-01 |
| <i>C9orf33</i>         | -1,13 | 9,73E-02 | 3,10E-01 |
| <i>AA420998</i>        | 1,06  | 9,73E-02 | 3,10E-01 |
| <i>HIATL1</i>          | -1,08 | 9,74E-02 | 3,10E-01 |
| <i>THC2340759</i>      | -1,08 | 9,74E-02 | 3,10E-01 |
| <i>BQ029628</i>        | 1,07  | 9,74E-02 | 3,10E-01 |
| <i>DCTN4</i>           | -1,08 | 9,74E-02 | 3,10E-01 |
| <i>B3GAT3</i>          | 1,06  | 9,74E-02 | 3,10E-01 |
| <i>CAST</i>            | 1,08  | 9,75E-02 | 3,10E-01 |
| <i>AF469043</i>        | -1,06 | 9,75E-02 | 3,10E-01 |
| <i>SCRT1</i>           | 1,04  | 9,75E-02 | 3,10E-01 |
| <i>C20orf135</i>       | 1,06  | 9,75E-02 | 3,10E-01 |

|                        |       |          |          |
|------------------------|-------|----------|----------|
| <i>A_24_P642240</i>    | 1,05  | 9,75E-02 | 3,10E-01 |
| <i>NUMBL</i>           | 1,06  | 9,76E-02 | 3,10E-01 |
| <i>BRCC2</i>           | -1,10 | 9,76E-02 | 3,10E-01 |
| <i>GOSR2</i>           | -1,07 | 9,76E-02 | 3,10E-01 |
| <i>ENST00000344581</i> | 1,09  | 9,76E-02 | 3,10E-01 |
| <i>WASL</i>            | 1,09  | 9,76E-02 | 3,10E-01 |
| <i>C9orf70</i>         | 1,05  | 9,77E-02 | 3,10E-01 |
| <i>KCNJ4</i>           | 1,07  | 9,77E-02 | 3,10E-01 |
| <i>C21orf33</i>        | -1,06 | 9,77E-02 | 3,11E-01 |
| <i>SLC36A1</i>         | 1,08  | 9,77E-02 | 3,11E-01 |
| <i>THC2429731</i>      | -1,06 | 9,78E-02 | 3,11E-01 |
| <i>A_24_P941627</i>    | 1,06  | 9,78E-02 | 3,11E-01 |
| <i>XKRY2</i>           | 1,06  | 9,78E-02 | 3,11E-01 |
| <i>ENST00000309828</i> | 1,10  | 9,78E-02 | 3,11E-01 |
| <i>BC037837</i>        | -1,07 | 9,79E-02 | 3,11E-01 |
| <i>MRPS5</i>           | -1,05 | 9,78E-02 | 3,11E-01 |
| <i>PSMC1</i>           | 1,06  | 9,79E-02 | 3,11E-01 |
| <i>SAP30BP</i>         | 1,07  | 9,78E-02 | 3,11E-01 |
| <i>MAGEA5</i>          | 1,10  | 9,79E-02 | 3,11E-01 |
| <i>A_24_P349896</i>    | 1,14  | 9,79E-02 | 3,11E-01 |
| <i>FLJ22184</i>        | 1,09  | 9,80E-02 | 3,11E-01 |
| <i>CD96</i>            | -1,09 | 9,80E-02 | 3,11E-01 |
| <i>HELB</i>            | 1,16  | 9,80E-02 | 3,11E-01 |
| <i>THC2396961</i>      | -1,16 | 9,80E-02 | 3,11E-01 |
| <i>CTNS</i>            | -1,07 | 9,81E-02 | 3,11E-01 |
| <i>COX6B2</i>          | 1,05  | 9,81E-02 | 3,11E-01 |
| <i>PNMA3</i>           | -1,17 | 9,81E-02 | 3,11E-01 |
| <i>ZNF140</i>          | -1,07 | 9,81E-02 | 3,11E-01 |
| <i>LOC643006</i>       | -1,06 | 9,81E-02 | 3,11E-01 |
| <i>AKR1CL2</i>         | 1,08  | 9,81E-02 | 3,11E-01 |
| <i>MYOZ2</i>           | 1,10  | 9,82E-02 | 3,11E-01 |
| <i>THC2400533</i>      | 1,05  | 9,82E-02 | 3,11E-01 |
| <i>A_24_P735283</i>    | 1,07  | 9,82E-02 | 3,11E-01 |
| <i>THC2403056</i>      | 1,14  | 9,82E-02 | 3,11E-01 |
| <i>AI470277</i>        | 1,16  | 9,82E-02 | 3,11E-01 |
| <i>THC2425047</i>      | -1,17 | 9,83E-02 | 3,11E-01 |
| <i>AI161251</i>        | -1,06 | 9,83E-02 | 3,11E-01 |
| <i>RHOJ</i>            | 1,09  | 9,83E-02 | 3,11E-01 |
| <i>AK092698</i>        | 1,24  | 9,83E-02 | 3,11E-01 |
| <i>FLJ42486</i>        | 1,07  | 9,83E-02 | 3,11E-01 |
| <i>PLAU</i>            | 1,14  | 9,83E-02 | 3,12E-01 |
| <i>A_32_P169243</i>    | -1,13 | 9,83E-02 | 3,12E-01 |
| <i>PAK1IP1</i>         | 1,09  | 9,84E-02 | 3,12E-01 |
| <i>TM6SF2</i>          | -1,07 | 9,84E-02 | 3,12E-01 |



|                        |       |          |          |
|------------------------|-------|----------|----------|
| <i>THC2315973</i>      | -1,08 | 9,84E-02 | 3,12E-01 |
| <i>CDADC1</i>          | 1,05  | 9,84E-02 | 3,12E-01 |
| <i>FRAP1</i>           | 1,06  | 9,84E-02 | 3,12E-01 |
| <i>THC2314833</i>      | 1,28  | 9,84E-02 | 3,12E-01 |
| <i>THC2316481</i>      | 1,06  | 9,84E-02 | 3,12E-01 |
| <i>CF527929</i>        | 1,07  | 9,85E-02 | 3,12E-01 |
| <i>FAM113B</i>         | -1,09 | 9,85E-02 | 3,12E-01 |
| <i>HSP90AB1</i>        | 1,06  | 9,85E-02 | 3,12E-01 |
| <i>ISOC1</i>           | -1,34 | 9,85E-02 | 3,12E-01 |
| <i>CDC42EP3</i>        | -1,25 | 9,85E-02 | 3,12E-01 |
| <i>HLA-DPB1</i>        | -1,13 | 9,86E-02 | 3,12E-01 |
| <i>AK098637</i>        | -1,08 | 9,87E-02 | 3,12E-01 |
| <i>MAML3</i>           | -1,07 | 9,87E-02 | 3,12E-01 |
| <i>CNBD1</i>           | 1,07  | 9,87E-02 | 3,12E-01 |
| <i>BG190682</i>        | 1,12  | 9,87E-02 | 3,12E-01 |
| <i>GLRA1</i>           | -1,07 | 9,87E-02 | 3,12E-01 |
| <i>PIN1</i>            | 1,05  | 9,88E-02 | 3,12E-01 |
| <i>A_24_P230486</i>    | 1,12  | 9,88E-02 | 3,12E-01 |
| <i>THC2312128</i>      | 1,20  | 9,88E-02 | 3,12E-01 |
| <i>THC2280563</i>      | -1,06 | 9,89E-02 | 3,13E-01 |
| <i>HOXA3</i>           | 1,07  | 9,89E-02 | 3,13E-01 |
| <i>LOC149134</i>       | -1,11 | 9,89E-02 | 3,13E-01 |
| <i>DENND1A</i>         | 1,04  | 9,90E-02 | 3,13E-01 |
| <i>SECTM1</i>          | 1,14  | 9,90E-02 | 3,13E-01 |
| <i>CYB5D1</i>          | 1,11  | 9,90E-02 | 3,13E-01 |
| <i>AF075027</i>        | 1,14  | 9,91E-02 | 3,13E-01 |
| <i>NDP</i>             | -1,29 | 9,91E-02 | 3,13E-01 |
| <i>FAM65A</i>          | 1,07  | 9,91E-02 | 3,13E-01 |
| <i>C21orf15</i>        | -1,17 | 9,91E-02 | 3,13E-01 |
| <i>TBN</i>             | -1,08 | 9,91E-02 | 3,13E-01 |
| <i>ENST00000265271</i> | 1,07  | 9,92E-02 | 3,13E-01 |
| <i>PDZD6</i>           | -1,08 | 9,92E-02 | 3,13E-01 |
| <i>STON1</i>           | -1,25 | 9,93E-02 | 3,13E-01 |
| <i>PNLIP</i>           | 1,05  | 9,93E-02 | 3,13E-01 |
| <i>THC2249196</i>      | -1,07 | 9,93E-02 | 3,13E-01 |
| <i>C8orf61</i>         | 1,11  | 9,93E-02 | 3,13E-01 |
| <i>A_24_P931079</i>    | -1,07 | 9,93E-02 | 3,13E-01 |
| <i>EPB41L5</i>         | -1,07 | 9,94E-02 | 3,13E-01 |
| <i>AK096230</i>        | -1,06 | 9,94E-02 | 3,14E-01 |
| <i>LOC400794</i>       | 1,05  | 9,94E-02 | 3,14E-01 |
| <i>TMEM150</i>         | -1,06 | 9,94E-02 | 3,14E-01 |
| <i>MRLC2</i>           | 1,05  | 9,95E-02 | 3,14E-01 |
| <i>LRRC46</i>          | 1,09  | 9,95E-02 | 3,14E-01 |
| <i>DHRS7</i>           | -1,06 | 9,96E-02 | 3,14E-01 |

|                        |       |          |          |
|------------------------|-------|----------|----------|
| <i>USP18</i>           | -1,10 | 9,96E-02 | 3,14E-01 |
| <i>COMMD8</i>          | -1,07 | 9,96E-02 | 3,14E-01 |
| <i>KIAA1279</i>        | -1,09 | 9,97E-02 | 3,14E-01 |
| <i>BLK</i>             | -1,06 | 9,97E-02 | 3,14E-01 |
| <i>KCTD21</i>          | -1,07 | 9,97E-02 | 3,14E-01 |
| <i>CRSP9</i>           | -1,06 | 9,98E-02 | 3,14E-01 |
| <i>THC2408757</i>      | -1,14 | 9,98E-02 | 3,14E-01 |
| <i>OFD1</i>            | 1,06  | 9,98E-02 | 3,14E-01 |
| <i>MYSM1</i>           | -1,11 | 9,98E-02 | 3,14E-01 |
| <i>FOXL2</i>           | -1,52 | 9,98E-02 | 3,14E-01 |
| <i>MR1</i>             | 1,06  | 9,98E-02 | 3,14E-01 |
| <i>A_24_P910277</i>    | 1,06  | 9,99E-02 | 3,15E-01 |
| <i>AI341335</i>        | -1,12 | 9,99E-02 | 3,15E-01 |
| <i>RSAD1</i>           | -1,06 | 1,00E-01 | 3,15E-01 |
| <i>TLR8</i>            | -1,08 | 1,00E-01 | 3,15E-01 |
| <i>B3GALT5</i>         | 1,04  | 1,00E-01 | 3,15E-01 |
| <i>CR623684</i>        | -1,10 | 1,00E-01 | 3,15E-01 |
| <i>BM986990</i>        | 1,05  | 1,00E-01 | 3,15E-01 |
| <i>RSHL3</i>           | 1,06  | 1,00E-01 | 3,15E-01 |
| <i>AF119898</i>        | 1,06  | 1,00E-01 | 3,15E-01 |
| <i>AF116713</i>        | 1,10  | 1,00E-01 | 3,15E-01 |
| <i>BM802662</i>        | 1,14  | 1,00E-01 | 3,15E-01 |
| <i>SYN2</i>            | 1,08  | 1,00E-01 | 3,15E-01 |
| <i>D83692</i>          | -1,20 | 1,00E-01 | 3,15E-01 |
| <i>SLC28A1</i>         | 1,09  | 1,00E-01 | 3,15E-01 |
| <i>ENST00000298622</i> | -1,08 | 1,00E-01 | 3,15E-01 |
| <i>DAP</i>             | 1,09  | 1,00E-01 | 3,15E-01 |
| <i>DCAMKL2</i>         | 1,08  | 1,00E-01 | 3,15E-01 |
| <i>THC2343287</i>      | 1,12  | 1,00E-01 | 3,15E-01 |
| <i>BC021189</i>        | -1,05 | 1,00E-01 | 3,15E-01 |
| <i>A_32_P108748</i>    | -1,06 | 1,00E-01 | 3,15E-01 |
| <i>C11orf68</i>        | -1,06 | 1,00E-01 | 3,15E-01 |
| <i>LMLN</i>            | -1,07 | 1,00E-01 | 3,15E-01 |
| <i>BE672039</i>        | -1,12 | 1,00E-01 | 3,15E-01 |
| <i>GUCY2C</i>          | -1,07 | 1,00E-01 | 3,15E-01 |
| <i>POGZ</i>            | -1,07 | 1,00E-01 | 3,15E-01 |
| <i>36951</i>           | -1,13 | 1,00E-01 | 3,15E-01 |
| <i>MDC1</i>            | -1,07 | 1,00E-01 | 3,15E-01 |
| <i>RAB11A</i>          | 1,07  | 1,00E-01 | 3,15E-01 |
| <i>SFXN1</i>           | 1,08  | 1,00E-01 | 3,15E-01 |
| <i>A_24_P931673</i>    | 1,06  | 1,00E-01 | 3,15E-01 |
| <i>ATP5C1</i>          | 1,06  | 1,00E-01 | 3,16E-01 |
| <i>WDR32</i>           | 1,06  | 1,01E-01 | 3,16E-01 |
| <i>DNASE2</i>          | 1,12  | 1,01E-01 | 3,16E-01 |

|                        |       |          |          |
|------------------------|-------|----------|----------|
| <i>ENST00000368761</i> | -1,08 | 1,01E-01 | 3,16E-01 |
| <i>LOC641522</i>       | -1,07 | 1,01E-01 | 3,16E-01 |
| <i>C17orf67</i>        | -1,06 | 1,01E-01 | 3,16E-01 |
| <i>GBP7</i>            | 1,06  | 1,01E-01 | 3,16E-01 |
| <i>THC2398598</i>      | -1,14 | 1,01E-01 | 3,16E-01 |
| <i>BX387925</i>        | 1,07  | 1,01E-01 | 3,16E-01 |
| <i>SRP72</i>           | 1,07  | 1,01E-01 | 3,16E-01 |
| <i>EFCAB3</i>          | 1,08  | 1,01E-01 | 3,16E-01 |
| <i>NDUFA4</i>          | 1,08  | 1,01E-01 | 3,16E-01 |
| <i>UNQ9433</i>         | 1,14  | 1,01E-01 | 3,16E-01 |
| <i>THRA</i>            | -1,06 | 1,01E-01 | 3,16E-01 |
| <i>LMTK2</i>           | 1,08  | 1,01E-01 | 3,16E-01 |
| <i>PHF3</i>            | -1,09 | 1,01E-01 | 3,16E-01 |
| <i>U82320</i>          | -1,05 | 1,01E-01 | 3,16E-01 |
| <i>LOC388272</i>       | 1,05  | 1,01E-01 | 3,16E-01 |
| <i>C20orf56</i>        | -1,06 | 1,01E-01 | 3,16E-01 |
| <i>A_24_P367109</i>    | -1,06 | 1,01E-01 | 3,17E-01 |
| <i>PCDHB9</i>          | -1,10 | 1,01E-01 | 3,17E-01 |
| <i>ATF1</i>            | 1,12  | 1,01E-01 | 3,17E-01 |
| <i>F3</i>              | -1,22 | 1,01E-01 | 3,17E-01 |
| <i>A_32_P223292</i>    | -1,12 | 1,01E-01 | 3,17E-01 |
| <i>TNFRSF10C</i>       | 1,14  | 1,01E-01 | 3,17E-01 |
| <i>MGC16025</i>        | -1,11 | 1,01E-01 | 3,17E-01 |
| <i>KCNMB4</i>          | 1,11  | 1,01E-01 | 3,17E-01 |
| <i>ENST00000354689</i> | -1,13 | 1,01E-01 | 3,17E-01 |
| <i>ZNF559</i>          | -1,07 | 1,01E-01 | 3,17E-01 |
| <i>ADD3</i>            | -1,12 | 1,01E-01 | 3,17E-01 |
| <i>DDHD1</i>           | 1,07  | 1,01E-01 | 3,17E-01 |
| <i>PIP5K2A</i>         | 1,12  | 1,01E-01 | 3,17E-01 |
| <i>PGGT1B</i>          | 1,07  | 1,01E-01 | 3,18E-01 |
| <i>AV645774</i>        | -1,12 | 1,01E-01 | 3,18E-01 |
| <i>A_23_P65845</i>     | -1,06 | 1,02E-01 | 3,18E-01 |
| <i>A_24_P15803</i>     | -1,09 | 1,02E-01 | 3,18E-01 |
| <i>ZMYM4</i>           | -1,05 | 1,02E-01 | 3,18E-01 |
| <i>CSNK1G3</i>         | 1,04  | 1,02E-01 | 3,18E-01 |
| <i>AW993939</i>        | 1,21  | 1,02E-01 | 3,18E-01 |
| <i>MAP1B</i>           | 1,14  | 1,02E-01 | 3,18E-01 |
| <i>THC2321224</i>      | -1,10 | 1,02E-01 | 3,18E-01 |
| <i>R01145</i>          | -1,06 | 1,02E-01 | 3,18E-01 |
| <i>TCTE3</i>           | 1,05  | 1,02E-01 | 3,18E-01 |
| <i>CCDC69</i>          | 1,11  | 1,02E-01 | 3,18E-01 |
| <i>TAAR8</i>           | 1,04  | 1,02E-01 | 3,18E-01 |
| <i>FLJ37644</i>        | 1,09  | 1,02E-01 | 3,18E-01 |
| <i>MUS81</i>           | -1,06 | 1,02E-01 | 3,18E-01 |

|                        |       |          |          |
|------------------------|-------|----------|----------|
| <i>CES2</i>            | -1,05 | 1,02E-01 | 3,18E-01 |
| <i>BC080624</i>        | 1,05  | 1,02E-01 | 3,18E-01 |
| <i>A_24_P921748</i>    | 1,06  | 1,02E-01 | 3,18E-01 |
| <i>ANKRD26</i>         | -1,06 | 1,02E-01 | 3,18E-01 |
| <i>A_24_P178764</i>    | -1,05 | 1,02E-01 | 3,18E-01 |
| <i>PPM1F</i>           | 1,15  | 1,02E-01 | 3,18E-01 |
| <i>INSAF</i>           | 1,06  | 1,02E-01 | 3,18E-01 |
| <i>PYGM</i>            | 1,21  | 1,02E-01 | 3,18E-01 |
| <i>ENST00000274413</i> | -1,06 | 1,02E-01 | 3,18E-01 |
| <i>PCDHGC3</i>         | 1,05  | 1,02E-01 | 3,18E-01 |
| <i>A_24_P928133</i>    | -1,06 | 1,02E-01 | 3,18E-01 |
| <i>TFDP1</i>           | 1,07  | 1,02E-01 | 3,19E-01 |
| <i>AKR1D1</i>          | 1,06  | 1,02E-01 | 3,19E-01 |
| <i>AF116624</i>        | 1,07  | 1,02E-01 | 3,19E-01 |
| <i>THC2296737</i>      | -1,07 | 1,02E-01 | 3,19E-01 |
| <i>A_24_P229726</i>    | -1,10 | 1,02E-01 | 3,19E-01 |
| <i>AK056396</i>        | -1,10 | 1,02E-01 | 3,19E-01 |
| <i>DPPA4</i>           | 1,06  | 1,02E-01 | 3,19E-01 |
| <i>NOP5/NOP58</i>      | 1,08  | 1,02E-01 | 3,19E-01 |
| <i>THC2355752</i>      | 1,14  | 1,02E-01 | 3,19E-01 |
| <i>ZNRD1</i>           | -1,06 | 1,02E-01 | 3,19E-01 |
| <i>ITGB1BP3</i>        | 1,08  | 1,02E-01 | 3,19E-01 |
| <i>THC2382022</i>      | 1,06  | 1,02E-01 | 3,19E-01 |
| <i>KLRC1</i>           | -1,09 | 1,02E-01 | 3,19E-01 |
| <i>AI709405</i>        | 1,11  | 1,02E-01 | 3,19E-01 |
| <i>TCERG1</i>          | -1,06 | 1,02E-01 | 3,19E-01 |
| <i>A_32_P31021</i>     | -1,07 | 1,03E-01 | 3,20E-01 |
| <i>BC092421</i>        | -1,06 | 1,03E-01 | 3,20E-01 |
| <i>SPRR2G</i>          | 1,36  | 1,03E-01 | 3,20E-01 |
| <i>BF513730</i>        | -1,10 | 1,03E-01 | 3,20E-01 |
| <i>ENG</i>             | 1,09  | 1,03E-01 | 3,20E-01 |
| <i>SLC12A2</i>         | 1,20  | 1,03E-01 | 3,20E-01 |
| <i>RPL30</i>           | -1,07 | 1,03E-01 | 3,20E-01 |
| <i>A_23_P329062</i>    | 1,08  | 1,03E-01 | 3,20E-01 |
| <i>RP5-1054A22.3</i>   | -1,11 | 1,03E-01 | 3,20E-01 |
| <i>SIGLEC6</i>         | -1,08 | 1,03E-01 | 3,20E-01 |
| <i>CNIH4</i>           | 1,05  | 1,03E-01 | 3,20E-01 |
| <i>ACSM3</i>           | -1,07 | 1,03E-01 | 3,20E-01 |
| <i>LYN</i>             | 1,08  | 1,03E-01 | 3,20E-01 |
| <i>AK096317</i>        | -1,05 | 1,03E-01 | 3,20E-01 |
| <i>TXN</i>             | 1,07  | 1,03E-01 | 3,20E-01 |
| <i>AK131287</i>        | 1,06  | 1,03E-01 | 3,20E-01 |
| <i>PRPSAP2</i>         | -1,07 | 1,03E-01 | 3,21E-01 |
| <i>GPR68</i>           | 1,30  | 1,03E-01 | 3,21E-01 |

|                        |       |          |          |
|------------------------|-------|----------|----------|
| <i>ENST00000367142</i> | 1,07  | 1,03E-01 | 3,21E-01 |
| <i>HCRTR1</i>          | 1,08  | 1,03E-01 | 3,21E-01 |
| <i>ENST00000368149</i> | -1,11 | 1,03E-01 | 3,21E-01 |
| <i>CREB3L4</i>         | -1,09 | 1,03E-01 | 3,21E-01 |
| <i>SNAPC2</i>          | -1,14 | 1,03E-01 | 3,21E-01 |
| <i>PRPF40A</i>         | 1,09  | 1,03E-01 | 3,21E-01 |
| <i>A_32_P105940</i>    | 1,12  | 1,03E-01 | 3,21E-01 |
| <i>LOC440337</i>       | -1,17 | 1,03E-01 | 3,21E-01 |
| <i>THC2420304</i>      | -1,07 | 1,03E-01 | 3,21E-01 |
| <i>A_32_P100475</i>    | 1,10  | 1,03E-01 | 3,21E-01 |
| <i>K6IRS3</i>          | 1,06  | 1,03E-01 | 3,21E-01 |
| <i>A_24_P780709</i>    | 1,06  | 1,03E-01 | 3,21E-01 |
| <i>LPXN</i>            | -1,08 | 1,03E-01 | 3,21E-01 |
| <i>EPDR1</i>           | -1,15 | 1,03E-01 | 3,21E-01 |
| <i>AK057576</i>        | -1,17 | 1,03E-01 | 3,21E-01 |
| <i>SH2D1A</i>          | -1,12 | 1,03E-01 | 3,21E-01 |
| <i>LOC645683</i>       | -1,06 | 1,03E-01 | 3,21E-01 |
| <i>CTBP1</i>           | -1,05 | 1,03E-01 | 3,21E-01 |
| <i>EN1</i>             | 1,10  | 1,03E-01 | 3,21E-01 |
| <i>LOC163233</i>       | -1,12 | 1,04E-01 | 3,21E-01 |
| <i>PREP</i>            | -1,05 | 1,04E-01 | 3,21E-01 |
| <i>GTF3C2</i>          | -1,05 | 1,04E-01 | 3,21E-01 |
| <i>THC2446322</i>      | 1,05  | 1,04E-01 | 3,21E-01 |
| <i>A_32_P211391</i>    | 1,06  | 1,04E-01 | 3,21E-01 |
| <i>HEXIM1</i>          | 1,09  | 1,04E-01 | 3,21E-01 |
| <i>SAA1</i>            | -1,34 | 1,04E-01 | 3,22E-01 |
| <i>UBE2Q1</i>          | -1,04 | 1,04E-01 | 3,22E-01 |
| <i>FGFR1</i>           | 1,08  | 1,04E-01 | 3,22E-01 |
| <i>CCNB3</i>           | -1,07 | 1,04E-01 | 3,22E-01 |
| <i>AK131472</i>        | -1,09 | 1,04E-01 | 3,22E-01 |
| <i>KHDRBS3</i>         | 1,14  | 1,04E-01 | 3,22E-01 |
| <i>ALOX12</i>          | -1,37 | 1,04E-01 | 3,22E-01 |
| <i>THC2350529</i>      | 1,05  | 1,04E-01 | 3,22E-01 |
| <i>ZNF32</i>           | -1,05 | 1,04E-01 | 3,22E-01 |
| <i>DMN</i>             | 1,57  | 1,04E-01 | 3,22E-01 |
| <i>MGC5457</i>         | -1,14 | 1,04E-01 | 3,22E-01 |
| <i>KIAA1826</i>        | -1,08 | 1,04E-01 | 3,22E-01 |
| <i>TFAM</i>            | -1,07 | 1,04E-01 | 3,22E-01 |
| <i>AP3D1</i>           | 1,08  | 1,04E-01 | 3,22E-01 |
| <i>AK130891</i>        | 1,11  | 1,04E-01 | 3,22E-01 |
| <i>A_32_P130217</i>    | -1,12 | 1,04E-01 | 3,22E-01 |
| <i>AK022297</i>        | -1,10 | 1,04E-01 | 3,22E-01 |
| <i>A_32_P168126</i>    | 1,05  | 1,04E-01 | 3,22E-01 |
| <i>DNAJC12</i>         | 1,14  | 1,04E-01 | 3,22E-01 |

|                        |       |          |          |
|------------------------|-------|----------|----------|
| <i>TNFRSF11B</i>       | 1,14  | 1,04E-01 | 3,22E-01 |
| <i>TNFSF10</i>         | -1,13 | 1,04E-01 | 3,22E-01 |
| <i>THC2411956</i>      | 1,07  | 1,04E-01 | 3,22E-01 |
| <i>ENST00000344441</i> | -1,09 | 1,04E-01 | 3,22E-01 |
| <i>FLJ10099</i>        | -1,05 | 1,04E-01 | 3,22E-01 |
| <i>PSMC4</i>           | 1,06  | 1,04E-01 | 3,22E-01 |
| <i>TFDP2</i>           | 1,07  | 1,04E-01 | 3,22E-01 |
| <i>A_24_P152855</i>    | 1,08  | 1,04E-01 | 3,22E-01 |
| <i>BG390955</i>        | -1,07 | 1,04E-01 | 3,22E-01 |
| <i>MTF2</i>            | -1,06 | 1,04E-01 | 3,22E-01 |
| <i>UBE2D1</i>          | 1,05  | 1,04E-01 | 3,22E-01 |
| <i>RNF126</i>          | 1,06  | 1,04E-01 | 3,22E-01 |
| <i>AF085351</i>        | -1,09 | 1,04E-01 | 3,22E-01 |
| <i>DZIP3</i>           | -1,07 | 1,04E-01 | 3,22E-01 |
| <i>PAXIP1</i>          | -1,06 | 1,04E-01 | 3,22E-01 |
| <i>TMED2</i>           | 1,11  | 1,04E-01 | 3,22E-01 |
| <i>CR623195</i>        | -1,07 | 1,04E-01 | 3,22E-01 |
| <i>AK131288</i>        | 1,07  | 1,04E-01 | 3,23E-01 |
| <i>ZNF528</i>          | -1,09 | 1,04E-01 | 3,23E-01 |
| <i>THC2407823</i>      | 1,07  | 1,04E-01 | 3,23E-01 |
| <i>FOLH1</i>           | -1,16 | 1,04E-01 | 3,23E-01 |
| <i>HSPC047</i>         | -1,10 | 1,04E-01 | 3,23E-01 |
| <i>THC2386560</i>      | -1,08 | 1,04E-01 | 3,23E-01 |
| <i>PLA2G12A</i>        | 1,06  | 1,04E-01 | 3,23E-01 |
| <i>AV724325</i>        | 1,07  | 1,04E-01 | 3,23E-01 |
| <i>PLCXD3</i>          | -1,24 | 1,05E-01 | 3,23E-01 |
| <i>A_23_P201521</i>    | -1,13 | 1,05E-01 | 3,23E-01 |
| <i>ARR3</i>            | 1,07  | 1,05E-01 | 3,23E-01 |
| <i>AK096056</i>        | -1,11 | 1,05E-01 | 3,23E-01 |
| <i>A_24_P409891</i>    | -1,06 | 1,05E-01 | 3,23E-01 |
| <i>SOX1</i>            | 1,07  | 1,05E-01 | 3,23E-01 |
| <i>C19orf16</i>        | -1,04 | 1,05E-01 | 3,23E-01 |
| <i>LTBP1</i>           | 1,38  | 1,05E-01 | 3,23E-01 |
| <i>A_32_P66266</i>     | -1,07 | 1,05E-01 | 3,23E-01 |
| <i>BF727393</i>        | 1,07  | 1,05E-01 | 3,23E-01 |
| <i>LOC349114</i>       | -1,09 | 1,05E-01 | 3,23E-01 |
| <i>AK027150</i>        | -1,06 | 1,05E-01 | 3,23E-01 |
| <i>A_24_P452024</i>    | 1,07  | 1,05E-01 | 3,23E-01 |
| <i>SYN1</i>            | 1,08  | 1,05E-01 | 3,23E-01 |
| <i>A_24_P255663</i>    | 1,11  | 1,05E-01 | 3,23E-01 |
| <i>PROM1</i>           | 1,26  | 1,05E-01 | 3,23E-01 |
| <i>FLJ39743</i>        | -1,06 | 1,05E-01 | 3,23E-01 |
| <i>CALM3</i>           | -1,05 | 1,05E-01 | 3,23E-01 |
| <i>ZFP36</i>           | 1,57  | 1,05E-01 | 3,23E-01 |

|                        |       |          |          |
|------------------------|-------|----------|----------|
| <i>ABCF1</i>           | 1,05  | 1,05E-01 | 3,23E-01 |
| <i>EIF2C3</i>          | 1,08  | 1,05E-01 | 3,23E-01 |
| <i>IQGAP3</i>          | 1,06  | 1,05E-01 | 3,24E-01 |
| <i>NMI</i>             | -1,07 | 1,05E-01 | 3,24E-01 |
| <i>CCDC60</i>          | -1,06 | 1,05E-01 | 3,24E-01 |
| <i>TRIM16</i>          | 1,14  | 1,05E-01 | 3,24E-01 |
| <i>ETG02_36680</i>     | 1,04  | 1,05E-01 | 3,24E-01 |
| <i>THC2266401</i>      | 1,09  | 1,05E-01 | 3,24E-01 |
| <i>MYL6B</i>           | -1,08 | 1,05E-01 | 3,24E-01 |
| <i>A_24_P943740</i>    | 1,07  | 1,05E-01 | 3,24E-01 |
| <i>IL6ST</i>           | 1,12  | 1,05E-01 | 3,24E-01 |
| <i>ADSL</i>            | 1,06  | 1,05E-01 | 3,24E-01 |
| <i>FAM111A</i>         | -1,09 | 1,05E-01 | 3,24E-01 |
| <i>AK024924</i>        | -1,07 | 1,05E-01 | 3,24E-01 |
| <i>ENST00000330379</i> | 1,05  | 1,05E-01 | 3,24E-01 |
| <i>AF116675</i>        | -1,06 | 1,05E-01 | 3,24E-01 |
| <i>SHD</i>             | 1,07  | 1,05E-01 | 3,24E-01 |
| <i>AASDH</i>           | -1,07 | 1,05E-01 | 3,24E-01 |
| <i>DUSP22</i>          | 1,05  | 1,05E-01 | 3,24E-01 |
| <i>BC062482</i>        | 1,06  | 1,05E-01 | 3,24E-01 |
| <i>ENST00000310146</i> | 1,10  | 1,05E-01 | 3,24E-01 |
| <i>A_24_P213396</i>    | 1,08  | 1,05E-01 | 3,24E-01 |
| <i>PRKAR1B</i>         | -1,09 | 1,05E-01 | 3,24E-01 |
| <i>AA451708</i>        | 1,10  | 1,05E-01 | 3,24E-01 |
| <i>TP53AP1</i>         | 1,05  | 1,05E-01 | 3,24E-01 |
| <i>KIAA1799</i>        | -1,09 | 1,05E-01 | 3,24E-01 |
| <i>THC2415754</i>      | -1,10 | 1,06E-01 | 3,25E-01 |
| <i>IRF2BP2</i>         | 1,11  | 1,06E-01 | 3,25E-01 |
| <i>BG695979</i>        | 1,11  | 1,06E-01 | 3,25E-01 |
| <i>LCP1</i>            | -1,17 | 1,06E-01 | 3,25E-01 |
| <i>AHDC1</i>           | -1,09 | 1,06E-01 | 3,25E-01 |
| <i>RFPL3S</i>          | -1,08 | 1,06E-01 | 3,25E-01 |
| <i>C18orf21</i>        | -1,07 | 1,06E-01 | 3,25E-01 |
| <i>A_32_P8627</i>      | -1,05 | 1,06E-01 | 3,25E-01 |
| <i>ENST00000294383</i> | -1,05 | 1,06E-01 | 3,25E-01 |
| <i>ENST00000342158</i> | 1,08  | 1,06E-01 | 3,25E-01 |
| <i>AK000774</i>        | 1,18  | 1,06E-01 | 3,25E-01 |
| <i>THC2434152</i>      | 1,25  | 1,06E-01 | 3,25E-01 |
| <i>AF116667</i>        | -1,07 | 1,06E-01 | 3,25E-01 |
| <i>FLRT3</i>           | 1,15  | 1,06E-01 | 3,25E-01 |
| <i>SOLH</i>            | -1,05 | 1,06E-01 | 3,25E-01 |
| <i>GPR171</i>          | -1,15 | 1,06E-01 | 3,25E-01 |
| <i>OLFML2A</i>         | -1,13 | 1,06E-01 | 3,25E-01 |
| <i>BC037791</i>        | -1,09 | 1,06E-01 | 3,25E-01 |

|                        |       |          |          |
|------------------------|-------|----------|----------|
| <i>CUL3</i>            | -1,08 | 1,06E-01 | 3,25E-01 |
| <i>PUM1</i>            | -1,06 | 1,06E-01 | 3,25E-01 |
| <i>A_24_P733553</i>    | 1,07  | 1,06E-01 | 3,25E-01 |
| <i>DHTKD1</i>          | -1,07 | 1,06E-01 | 3,25E-01 |
| <i>LARGE</i>           | -1,12 | 1,06E-01 | 3,25E-01 |
| <i>FLJ40298</i>        | -1,09 | 1,06E-01 | 3,25E-01 |
| <i>CD3G</i>            | -1,15 | 1,06E-01 | 3,25E-01 |
| <i>CR607745</i>        | -1,11 | 1,06E-01 | 3,25E-01 |
| <i>ARRDC3</i>          | 1,10  | 1,06E-01 | 3,25E-01 |
| <i>ENST00000169551</i> | -1,09 | 1,06E-01 | 3,25E-01 |
| <i>EHMT1</i>           | -1,06 | 1,06E-01 | 3,25E-01 |
| <i>TMPRSS3</i>         | 1,05  | 1,06E-01 | 3,25E-01 |
| <i>IFNA2</i>           | -1,06 | 1,06E-01 | 3,25E-01 |
| <i>A_24_P42071</i>     | 1,15  | 1,06E-01 | 3,25E-01 |
| <i>ZMYND12</i>         | -1,08 | 1,06E-01 | 3,25E-01 |
| <i>TESC</i>            | -1,11 | 1,06E-01 | 3,26E-01 |
| <i>A_32_P520</i>       | -1,08 | 1,06E-01 | 3,26E-01 |
| <i>CPSF6</i>           | -1,06 | 1,06E-01 | 3,26E-01 |
| <i>GSH1</i>            | 1,05  | 1,06E-01 | 3,26E-01 |
| <i>ZCCHC17</i>         | 1,06  | 1,06E-01 | 3,26E-01 |
| <i>A_32_P36225</i>     | -1,07 | 1,06E-01 | 3,26E-01 |
| <i>C2orf10</i>         | 1,07  | 1,06E-01 | 3,26E-01 |
| <i>MRPS25</i>          | 1,07  | 1,06E-01 | 3,26E-01 |
| <i>CCDC115</i>         | -1,08 | 1,06E-01 | 3,26E-01 |
| <i>GUSBL2</i>          | -1,14 | 1,06E-01 | 3,26E-01 |
| <i>MTG1</i>            | -1,07 | 1,06E-01 | 3,26E-01 |
| <i>GNPTAB</i>          | -1,06 | 1,06E-01 | 3,26E-01 |
| <i>NF1</i>             | -1,05 | 1,06E-01 | 3,26E-01 |
| <i>HRBL</i>            | -1,05 | 1,06E-01 | 3,26E-01 |
| <i>STAM2</i>           | 1,04  | 1,06E-01 | 3,26E-01 |
| <i>SLC13A1</i>         | 1,04  | 1,06E-01 | 3,26E-01 |
| <i>ENST00000329312</i> | 1,05  | 1,06E-01 | 3,26E-01 |
| <i>ENST00000332203</i> | 1,06  | 1,06E-01 | 3,26E-01 |
| <i>ATP5E</i>           | 1,07  | 1,06E-01 | 3,26E-01 |
| <i>AK128457</i>        | 1,09  | 1,06E-01 | 3,26E-01 |
| <i>TACR1</i>           | -1,06 | 1,06E-01 | 3,26E-01 |
| <i>SCTR</i>            | -1,05 | 1,06E-01 | 3,26E-01 |
| <i>BM666433</i>        | 1,06  | 1,07E-01 | 3,26E-01 |
| <i>C14orf162</i>       | 1,13  | 1,07E-01 | 3,26E-01 |
| <i>KIF26B</i>          | -1,22 | 1,07E-01 | 3,26E-01 |
| <i>UBIAD1</i>          | 1,06  | 1,07E-01 | 3,26E-01 |
| <i>A_23_P147404</i>    | 1,15  | 1,07E-01 | 3,26E-01 |
| <i>ENST00000366577</i> | -1,08 | 1,07E-01 | 3,26E-01 |
| <i>TEX13B</i>          | 1,06  | 1,07E-01 | 3,26E-01 |



|                        |       |          |          |
|------------------------|-------|----------|----------|
| <i>LOC253039</i>       | -1,16 | 1,07E-01 | 3,26E-01 |
| <i>JMJD5</i>           | -1,05 | 1,07E-01 | 3,26E-01 |
| <i>LOC441601</i>       | -1,15 | 1,07E-01 | 3,26E-01 |
| <i>ZNF124</i>          | -1,09 | 1,07E-01 | 3,26E-01 |
| <i>PRM1</i>            | -1,05 | 1,07E-01 | 3,26E-01 |
| <i>DEGS1</i>           | 1,08  | 1,07E-01 | 3,27E-01 |
| <i>D80006</i>          | -1,09 | 1,07E-01 | 3,27E-01 |
| <i>FLJ37228</i>        | -1,06 | 1,07E-01 | 3,27E-01 |
| <i>AT_W_M</i>          | 1,08  | 1,07E-01 | 3,27E-01 |
| <i>IBRDC2</i>          | -1,10 | 1,07E-01 | 3,27E-01 |
| <i>SUGT1</i>           | 1,05  | 1,07E-01 | 3,27E-01 |
| <i>FAM123B</i>         | -1,10 | 1,07E-01 | 3,27E-01 |
| <i>A_24_P925109</i>    | 1,06  | 1,07E-01 | 3,27E-01 |
| <i>KIF13A</i>          | 1,06  | 1,07E-01 | 3,27E-01 |
| <i>TRAPPC6B</i>        | 1,07  | 1,07E-01 | 3,27E-01 |
| <i>TRPM6</i>           | 1,10  | 1,07E-01 | 3,27E-01 |
| <i>AK130366</i>        | -1,09 | 1,07E-01 | 3,27E-01 |
| <i>TTC21A</i>          | -1,08 | 1,07E-01 | 3,27E-01 |
| <i>AW664702</i>        | -1,07 | 1,07E-01 | 3,27E-01 |
| <i>FOXN4</i>           | -1,26 | 1,07E-01 | 3,27E-01 |
| <i>BC010535</i>        | -1,07 | 1,07E-01 | 3,27E-01 |
| <i>CEP350</i>          | -1,06 | 1,07E-01 | 3,27E-01 |
| <i>THC2342624</i>      | 1,13  | 1,07E-01 | 3,27E-01 |
| <i>THC2378908</i>      | 1,06  | 1,07E-01 | 3,27E-01 |
| <i>ENST00000377444</i> | 1,19  | 1,07E-01 | 3,27E-01 |
| <i>FMR1NB</i>          | 1,09  | 1,07E-01 | 3,27E-01 |
| <i>BGN</i>             | 1,19  | 1,07E-01 | 3,27E-01 |
| <i>THC2337710</i>      | 1,13  | 1,07E-01 | 3,27E-01 |
| <i>PINK1</i>           | 1,09  | 1,07E-01 | 3,27E-01 |
| <i>GPR157</i>          | -1,12 | 1,07E-01 | 3,27E-01 |
| <i>C10orf26</i>        | 1,06  | 1,07E-01 | 3,27E-01 |
| <i>C21orf91</i>        | 1,08  | 1,07E-01 | 3,27E-01 |
| <i>LOC133957</i>       | -1,08 | 1,07E-01 | 3,27E-01 |
| <i>A_23_P52951</i>     | -1,05 | 1,07E-01 | 3,27E-01 |
| <i>TRGV7</i>           | 1,06  | 1,07E-01 | 3,27E-01 |
| <i>A_24_P922387</i>    | 1,09  | 1,07E-01 | 3,27E-01 |
| <i>BC065754</i>        | 1,06  | 1,07E-01 | 3,27E-01 |
| <i>CGB</i>             | 1,06  | 1,08E-01 | 3,27E-01 |
| <i>AA554768</i>        | 1,08  | 1,07E-01 | 3,27E-01 |
| <i>A_23_P217187</i>    | 1,08  | 1,07E-01 | 3,27E-01 |
| <i>BX648566</i>        | -1,10 | 1,08E-01 | 3,28E-01 |
| <i>YY1AP1</i>          | -1,06 | 1,08E-01 | 3,28E-01 |
| <i>A_24_P392414</i>    | 1,13  | 1,08E-01 | 3,28E-01 |
| <i>AK025669</i>        | -1,20 | 1,08E-01 | 3,28E-01 |

|                   |       |          |          |
|-------------------|-------|----------|----------|
| <i>LOC151162</i>  | 1,07  | 1,08E-01 | 3,28E-01 |
| <i>C1orf113</i>   | 1,09  | 1,08E-01 | 3,28E-01 |
| <i>SPA17</i>      | 1,08  | 1,08E-01 | 3,28E-01 |
| <i>AK022102</i>   | 1,06  | 1,08E-01 | 3,28E-01 |
| <i>LY6G6E</i>     | -1,06 | 1,08E-01 | 3,28E-01 |
| <i>COL7A1</i>     | 1,18  | 1,08E-01 | 3,28E-01 |
| <i>FATE1</i>      | -1,06 | 1,08E-01 | 3,28E-01 |
| <i>THC2289044</i> | -1,09 | 1,08E-01 | 3,28E-01 |
| <i>BX102475</i>   | 1,04  | 1,08E-01 | 3,28E-01 |
| <i>PIGB</i>       | -1,09 | 1,08E-01 | 3,28E-01 |
| <i>C1orf190</i>   | 1,09  | 1,08E-01 | 3,28E-01 |
| <i>LOC146325</i>  | 1,12  | 1,08E-01 | 3,28E-01 |
| <i>SV2A</i>       | 1,05  | 1,08E-01 | 3,28E-01 |
| <i>KIAA0894</i>   | 1,18  | 1,08E-01 | 3,28E-01 |
| <i>SEC14L4</i>    | -1,08 | 1,08E-01 | 3,29E-01 |
| <i>MGAT4C</i>     | 1,14  | 1,08E-01 | 3,29E-01 |
| <i>THC2302075</i> | -1,09 | 1,08E-01 | 3,29E-01 |
| <i>FLJ35740</i>   | 1,05  | 1,08E-01 | 3,29E-01 |
| <i>AK130071</i>   | -1,10 | 1,08E-01 | 3,29E-01 |
| <i>DEAF1</i>      | 1,05  | 1,08E-01 | 3,29E-01 |
| <i>CR623141</i>   | 1,07  | 1,08E-01 | 3,29E-01 |
| <i>AKAP7</i>      | -1,20 | 1,08E-01 | 3,29E-01 |
| <i>W60905</i>     | 1,12  | 1,08E-01 | 3,29E-01 |
| <i>NARF</i>       | 1,07  | 1,08E-01 | 3,29E-01 |
| <i>AK094786</i>   | 1,14  | 1,08E-01 | 3,29E-01 |
| <i>THC2313919</i> | -1,05 | 1,08E-01 | 3,29E-01 |
| <i>BC048283</i>   | -1,07 | 1,08E-01 | 3,29E-01 |
| <i>BQ183759</i>   | 1,06  | 1,08E-01 | 3,29E-01 |
| <i>CD691495</i>   | -1,06 | 1,08E-01 | 3,29E-01 |
| <i>DGCR6</i>      | 1,05  | 1,08E-01 | 3,29E-01 |
| <i>KCNN2</i>      | -1,26 | 1,09E-01 | 3,29E-01 |
| <i>C13orf18</i>   | -1,15 | 1,09E-01 | 3,29E-01 |
| <i>BE173582</i>   | -1,13 | 1,09E-01 | 3,29E-01 |
| <i>CCDC24</i>     | -1,08 | 1,09E-01 | 3,29E-01 |
| <i>BX096603</i>   | -1,05 | 1,09E-01 | 3,29E-01 |
| <i>PMPCB</i>      | 1,05  | 1,09E-01 | 3,29E-01 |
| <i>PROKR1</i>     | 1,06  | 1,09E-01 | 3,29E-01 |
| <i>NDE1</i>       | -1,08 | 1,09E-01 | 3,29E-01 |
| <i>C6orf108</i>   | -1,11 | 1,09E-01 | 3,29E-01 |
| <i>PKP2</i>       | -1,11 | 1,09E-01 | 3,30E-01 |
| <i>TBC1D15</i>    | 1,09  | 1,09E-01 | 3,30E-01 |
| <i>AA617765</i>   | 1,06  | 1,09E-01 | 3,30E-01 |
| <i>GJA1</i>       | -1,19 | 1,09E-01 | 3,30E-01 |
| <i>AF119901</i>   | -1,06 | 1,09E-01 | 3,30E-01 |

|                        |       |          |          |
|------------------------|-------|----------|----------|
| <i>A_24_P543460</i>    | 1,06  | 1,09E-01 | 3,30E-01 |
| <i>A_32_P140312</i>    | 1,06  | 1,09E-01 | 3,30E-01 |
| <i>KRTAP4-8</i>        | -1,06 | 1,09E-01 | 3,30E-01 |
| <i>ZC3H14</i>          | 1,05  | 1,09E-01 | 3,30E-01 |
| <i>TSPAN4</i>          | -1,06 | 1,09E-01 | 3,30E-01 |
| <i>HS3ST4</i>          | 1,09  | 1,09E-01 | 3,30E-01 |
| <i>KLRB1</i>           | -1,19 | 1,09E-01 | 3,30E-01 |
| <i>A_24_P367069</i>    | -1,06 | 1,09E-01 | 3,30E-01 |
| <i>TMEM4</i>           | -1,06 | 1,09E-01 | 3,30E-01 |
| <i>SDCBP</i>           | 1,09  | 1,09E-01 | 3,30E-01 |
| <i>A_24_P641742</i>    | 1,06  | 1,09E-01 | 3,30E-01 |
| <i>HECTD3</i>          | -1,08 | 1,09E-01 | 3,30E-01 |
| <i>CXorf36</i>         | 1,11  | 1,09E-01 | 3,30E-01 |
| <i>TNS1</i>            | 1,22  | 1,09E-01 | 3,30E-01 |
| <i>BACE1</i>           | -1,10 | 1,09E-01 | 3,30E-01 |
| <i>P2RY8</i>           | -1,11 | 1,09E-01 | 3,30E-01 |
| <i>PSMD13</i>          | 1,05  | 1,09E-01 | 3,30E-01 |
| <i>A_24_P186764</i>    | -1,05 | 1,09E-01 | 3,30E-01 |
| <i>AA435826</i>        | 1,06  | 1,09E-01 | 3,30E-01 |
| <i>A_32_P169383</i>    | -1,08 | 1,09E-01 | 3,30E-01 |
| <i>APBB1IP</i>         | 1,13  | 1,09E-01 | 3,30E-01 |
| <i>PARVG</i>           | -1,07 | 1,09E-01 | 3,30E-01 |
| <i>THC2342880</i>      | 1,07  | 1,09E-01 | 3,30E-01 |
| <i>CLDN11</i>          | 1,08  | 1,09E-01 | 3,30E-01 |
| <i>AA564209</i>        | -1,07 | 1,09E-01 | 3,31E-01 |
| <i>LRRC57</i>          | 1,06  | 1,09E-01 | 3,31E-01 |
| <i>HCRT</i>            | 1,08  | 1,09E-01 | 3,31E-01 |
| <i>A_24_P350307</i>    | -1,07 | 1,09E-01 | 3,31E-01 |
| <i>IGHM</i>            | -1,47 | 1,09E-01 | 3,31E-01 |
| <i>F10</i>             | -1,20 | 1,09E-01 | 3,31E-01 |
| <i>A_24_P928489</i>    | -1,12 | 1,09E-01 | 3,31E-01 |
| <i>A_32_P212108</i>    | -1,08 | 1,10E-01 | 3,31E-01 |
| <i>LOC51333</i>        | -1,07 | 1,10E-01 | 3,31E-01 |
| <i>MGC33367</i>        | 1,04  | 1,10E-01 | 3,31E-01 |
| <i>N91552</i>          | 1,08  | 1,10E-01 | 3,31E-01 |
| <i>LOC613212</i>       | 1,19  | 1,10E-01 | 3,31E-01 |
| <i>OR8D1</i>           | 1,05  | 1,10E-01 | 3,31E-01 |
| <i>CCL3</i>            | -1,53 | 1,10E-01 | 3,31E-01 |
| <i>A_24_P400690</i>    | 1,06  | 1,10E-01 | 3,31E-01 |
| <i>RIBC1</i>           | 1,06  | 1,10E-01 | 3,31E-01 |
| <i>THC2289056</i>      | 1,10  | 1,10E-01 | 3,31E-01 |
| <i>HIST1H1A</i>        | -1,18 | 1,10E-01 | 3,31E-01 |
| <i>ENST00000380676</i> | -1,10 | 1,10E-01 | 3,31E-01 |
| <i>AI873070</i>        | 1,09  | 1,10E-01 | 3,31E-01 |

|                        |       |          |          |
|------------------------|-------|----------|----------|
| <i>COL22A1</i>         | 1,13  | 1,10E-01 | 3,31E-01 |
| <i>MGC13057</i>        | 1,28  | 1,10E-01 | 3,31E-01 |
| <i>MUC20</i>           | -1,22 | 1,10E-01 | 3,32E-01 |
| <i>C10orf86</i>        | 1,04  | 1,10E-01 | 3,32E-01 |
| <i>ENST00000335932</i> | 1,06  | 1,10E-01 | 3,32E-01 |
| <i>COL21A1</i>         | -1,22 | 1,10E-01 | 3,32E-01 |
| <i>GPX1</i>            | 1,07  | 1,10E-01 | 3,32E-01 |
| <i>LOC646564</i>       | 1,07  | 1,10E-01 | 3,32E-01 |
| <i>CCDC96</i>          | 1,06  | 1,10E-01 | 3,32E-01 |
| <i>APOM</i>            | -1,05 | 1,10E-01 | 3,32E-01 |
| <i>AF258585</i>        | -1,08 | 1,10E-01 | 3,32E-01 |
| <i>DKFZp434F142</i>    | -1,08 | 1,10E-01 | 3,32E-01 |
| <i>A_24_P922979</i>    | -1,07 | 1,10E-01 | 3,32E-01 |
| <i>BG548738</i>        | -1,06 | 1,10E-01 | 3,32E-01 |
| <i>ZFP91</i>           | 1,05  | 1,10E-01 | 3,32E-01 |
| <i>APOA2</i>           | 1,06  | 1,10E-01 | 3,32E-01 |
| <i>LAMB3</i>           | 1,33  | 1,10E-01 | 3,32E-01 |
| <i>EMILIN3</i>         | -1,10 | 1,10E-01 | 3,32E-01 |
| <i>DCP1A</i>           | 1,05  | 1,10E-01 | 3,32E-01 |
| <i>A_32_P189523</i>    | -1,09 | 1,10E-01 | 3,32E-01 |
| <i>KLHDC1</i>          | -1,06 | 1,10E-01 | 3,32E-01 |
| <i>STAC2</i>           | 1,43  | 1,10E-01 | 3,32E-01 |
| <i>GPSM3</i>           | 1,06  | 1,10E-01 | 3,33E-01 |
| <i>APOBEC3C</i>        | -1,07 | 1,10E-01 | 3,33E-01 |
| <i>ZNF511</i>          | 1,05  | 1,10E-01 | 3,33E-01 |
| <i>AI472054</i>        | 1,07  | 1,11E-01 | 3,33E-01 |
| <i>LEPREL1</i>         | -1,20 | 1,11E-01 | 3,33E-01 |
| <i>SLC6A6</i>          | 1,09  | 1,11E-01 | 3,33E-01 |
| <i>THC2342112</i>      | -1,07 | 1,11E-01 | 3,33E-01 |
| <i>MLLT10</i>          | -1,07 | 1,11E-01 | 3,33E-01 |
| <i>A_24_P733223</i>    | 1,07  | 1,11E-01 | 3,33E-01 |
| <i>GDF11</i>           | -1,10 | 1,11E-01 | 3,33E-01 |
| <i>RENBP</i>           | 1,07  | 1,11E-01 | 3,33E-01 |
| <i>ACSBG1</i>          | -1,12 | 1,11E-01 | 3,33E-01 |
| <i>A_32_P122089</i>    | -1,14 | 1,11E-01 | 3,33E-01 |
| <i>THC2437982</i>      | -1,09 | 1,11E-01 | 3,33E-01 |
| <i>THC2278239</i>      | -1,07 | 1,11E-01 | 3,33E-01 |
| <i>MTHFS</i>           | -1,07 | 1,11E-01 | 3,33E-01 |
| <i>A_32_P222030</i>    | -1,06 | 1,11E-01 | 3,33E-01 |
| <i>CUL4A</i>           | -1,06 | 1,11E-01 | 3,33E-01 |
| <i>BC041899</i>        | 1,05  | 1,11E-01 | 3,33E-01 |
| <i>ENST00000369529</i> | 1,06  | 1,11E-01 | 3,33E-01 |
| <i>SPDEF</i>           | 1,06  | 1,11E-01 | 3,33E-01 |
| <i>THC2291268</i>      | 1,08  | 1,11E-01 | 3,33E-01 |

|                        |       |          |          |
|------------------------|-------|----------|----------|
| <i>A_24_P924567</i>    | -1,08 | 1,11E-01 | 3,33E-01 |
| <i>LCN12</i>           | -1,10 | 1,11E-01 | 3,33E-01 |
| <i>C9orf88</i>         | 1,07  | 1,11E-01 | 3,33E-01 |
| <i>THC2449916</i>      | -1,12 | 1,11E-01 | 3,34E-01 |
| <i>RBM4</i>            | 1,05  | 1,11E-01 | 3,34E-01 |
| <i>FOXJ2</i>           | -1,08 | 1,11E-01 | 3,34E-01 |
| <i>FCRL4</i>           | 1,05  | 1,11E-01 | 3,34E-01 |
| <i>C14orf126</i>       | -1,07 | 1,11E-01 | 3,34E-01 |
| <i>C9orf4</i>          | -1,24 | 1,11E-01 | 3,34E-01 |
| <i>AI793066</i>        | -1,06 | 1,11E-01 | 3,34E-01 |
| <i>THC2339101</i>      | -1,07 | 1,11E-01 | 3,34E-01 |
| <i>THC2303960</i>      | 1,07  | 1,11E-01 | 3,34E-01 |
| <i>GNG2</i>            | -1,12 | 1,11E-01 | 3,34E-01 |
| <i>C1orf166</i>        | 1,06  | 1,11E-01 | 3,34E-01 |
| <i>BX098639</i>        | 1,07  | 1,11E-01 | 3,34E-01 |
| <i>RHBDF2</i>          | -1,14 | 1,11E-01 | 3,34E-01 |
| <i>AK096134</i>        | 1,06  | 1,11E-01 | 3,34E-01 |
| <i>THC2407831</i>      | 1,09  | 1,11E-01 | 3,34E-01 |
| <i>FRMD4B</i>          | 1,07  | 1,12E-01 | 3,35E-01 |
| <i>PPARGC1B</i>        | 1,17  | 1,12E-01 | 3,35E-01 |
| <i>AK027319</i>        | -1,10 | 1,12E-01 | 3,35E-01 |
| <i>ENST00000332935</i> | -1,10 | 1,12E-01 | 3,35E-01 |
| <i>LOC552889</i>       | -1,08 | 1,12E-01 | 3,35E-01 |
| <i>MAP4K2</i>          | -1,08 | 1,12E-01 | 3,35E-01 |
| <i>PARP8</i>           | 1,07  | 1,12E-01 | 3,35E-01 |
| <i>VMAC</i>            | -1,06 | 1,12E-01 | 3,35E-01 |
| <i>LOC389458</i>       | 1,10  | 1,12E-01 | 3,35E-01 |
| <i>ENST00000380960</i> | 1,24  | 1,12E-01 | 3,35E-01 |
| <i>MESP1</i>           | -1,06 | 1,12E-01 | 3,35E-01 |
| <i>AF035040</i>        | -1,06 | 1,12E-01 | 3,35E-01 |
| <i>ACADL</i>           | -1,13 | 1,12E-01 | 3,35E-01 |
| <i>A_24_P910724</i>    | 1,08  | 1,12E-01 | 3,35E-01 |
| <i>NLC1-B</i>          | 1,06  | 1,12E-01 | 3,35E-01 |
| <i>A_24_P869138</i>    | 1,09  | 1,12E-01 | 3,35E-01 |
| <i>A_24_P914957</i>    | 1,09  | 1,12E-01 | 3,35E-01 |
| <i>LOC541472</i>       | 1,10  | 1,12E-01 | 3,35E-01 |
| <i>MARVELD2</i>        | 1,13  | 1,12E-01 | 3,35E-01 |
| <i>ENST00000335523</i> | 1,14  | 1,12E-01 | 3,35E-01 |
| <i>VAPB</i>            | 1,07  | 1,12E-01 | 3,35E-01 |
| <i>PNRC2</i>           | -1,09 | 1,12E-01 | 3,35E-01 |
| <i>PPTC7</i>           | 1,06  | 1,12E-01 | 3,35E-01 |
| <i>CR621399</i>        | -1,08 | 1,12E-01 | 3,35E-01 |
| <i>CYP4F11</i>         | 1,05  | 1,12E-01 | 3,35E-01 |
| <i>BF869497</i>        | 1,09  | 1,12E-01 | 3,35E-01 |

|                        |       |          |          |
|------------------------|-------|----------|----------|
| <i>C9orf164</i>        | -1,06 | 1,12E-01 | 3,35E-01 |
| <i>A_24_P238819</i>    | 1,04  | 1,12E-01 | 3,35E-01 |
| <i>AI916036</i>        | 1,12  | 1,12E-01 | 3,35E-01 |
| <i>BX647764</i>        | -1,09 | 1,12E-01 | 3,35E-01 |
| <i>ENST00000374534</i> | 1,05  | 1,12E-01 | 3,35E-01 |
| <i>GYPC</i>            | 1,09  | 1,12E-01 | 3,35E-01 |
| <i>THC2280799</i>      | -1,08 | 1,12E-01 | 3,36E-01 |
| <i>THC2312955</i>      | -1,07 | 1,12E-01 | 3,36E-01 |
| <i>AK023401</i>        | -1,07 | 1,12E-01 | 3,36E-01 |
| <i>C1orf96</i>         | 1,08  | 1,12E-01 | 3,36E-01 |
| <i>CEACAM21</i>        | -1,09 | 1,12E-01 | 3,36E-01 |
| <i>MGC12916</i>        | -1,05 | 1,12E-01 | 3,36E-01 |
| <i>ZWILCH</i>          | 1,11  | 1,12E-01 | 3,36E-01 |
| <i>L17325</i>          | 1,10  | 1,12E-01 | 3,36E-01 |
| <i>SUV420H2</i>        | -1,06 | 1,12E-01 | 3,36E-01 |
| <i>C10orf58</i>        | 1,13  | 1,12E-01 | 3,36E-01 |
| <i>THC2312785</i>      | -1,07 | 1,13E-01 | 3,36E-01 |
| <i>GAS6</i>            | 1,12  | 1,13E-01 | 3,36E-01 |
| <i>AOAH</i>            | -1,12 | 1,13E-01 | 3,36E-01 |
| <i>THC2278097</i>      | 1,13  | 1,13E-01 | 3,36E-01 |
| <i>AK090897</i>        | -1,09 | 1,13E-01 | 3,37E-01 |
| <i>AF119912</i>        | -1,05 | 1,13E-01 | 3,37E-01 |
| <i>THC2408953</i>      | 1,06  | 1,13E-01 | 3,37E-01 |
| <i>PCSK7</i>           | 1,08  | 1,13E-01 | 3,37E-01 |
| <i>A_24_P941384</i>    | -1,05 | 1,13E-01 | 3,37E-01 |
| <i>CR620010</i>        | 1,09  | 1,13E-01 | 3,37E-01 |
| <i>A_24_P733083</i>    | 1,07  | 1,13E-01 | 3,37E-01 |
| <i>TSSK6</i>           | 1,06  | 1,13E-01 | 3,37E-01 |
| <i>BX648591</i>        | -1,11 | 1,13E-01 | 3,37E-01 |
| <i>CDT1</i>            | -1,09 | 1,13E-01 | 3,37E-01 |
| <i>SULT1A3</i>         | -1,08 | 1,13E-01 | 3,37E-01 |
| <i>A_23_P76298</i>     | -1,06 | 1,13E-01 | 3,37E-01 |
| <i>PRIM1</i>           | -1,06 | 1,13E-01 | 3,37E-01 |
| <i>SIAHBP1</i>         | 1,06  | 1,13E-01 | 3,37E-01 |
| <i>CLC</i>             | 1,20  | 1,13E-01 | 3,37E-01 |
| <i>THC2311946</i>      | -1,08 | 1,13E-01 | 3,37E-01 |
| <i>MGC4677</i>         | 1,12  | 1,13E-01 | 3,37E-01 |
| <i>ENST00000373886</i> | -1,12 | 1,13E-01 | 3,37E-01 |
| <i>AK097754</i>        | 1,06  | 1,13E-01 | 3,37E-01 |
| <i>THC2317139</i>      | 1,16  | 1,13E-01 | 3,37E-01 |
| <i>CEP290</i>          | -1,05 | 1,13E-01 | 3,37E-01 |
| <i>GPRC5C</i>          | 1,16  | 1,13E-01 | 3,37E-01 |
| <i>GLCE</i>            | -1,09 | 1,13E-01 | 3,37E-01 |
| <i>AW182715</i>        | 1,07  | 1,13E-01 | 3,37E-01 |

|                        |       |          |          |
|------------------------|-------|----------|----------|
| <i>BRAF</i>            | 1,07  | 1,13E-01 | 3,38E-01 |
| <i>THC2370457</i>      | 1,10  | 1,13E-01 | 3,38E-01 |
| <i>THC2407115</i>      | -1,27 | 1,13E-01 | 3,38E-01 |
| <i>C9orf7</i>          | 1,07  | 1,13E-01 | 3,38E-01 |
| <i>AL133570</i>        | -1,09 | 1,13E-01 | 3,38E-01 |
| <i>PXN</i>             | -1,10 | 1,13E-01 | 3,38E-01 |
| <i>PCOLN3</i>          | 1,06  | 1,13E-01 | 3,38E-01 |
| <i>PADI1</i>           | -1,06 | 1,13E-01 | 3,38E-01 |
| <i>ENST00000366569</i> | 1,12  | 1,14E-01 | 3,38E-01 |
| <i>AA971667</i>        | -1,07 | 1,14E-01 | 3,38E-01 |
| <i>LDB1</i>            | 1,05  | 1,14E-01 | 3,38E-01 |
| <i>DB160230</i>        | -1,09 | 1,14E-01 | 3,38E-01 |
| <i>ENST00000242916</i> | 1,16  | 1,14E-01 | 3,38E-01 |
| <i>BC033986</i>        | 1,05  | 1,14E-01 | 3,38E-01 |
| <i>BQ339228</i>        | 1,05  | 1,14E-01 | 3,38E-01 |
| <i>COL10A1</i>         | -1,10 | 1,14E-01 | 3,38E-01 |
| <i>SNIP1</i>           | 1,05  | 1,14E-01 | 3,38E-01 |
| <i>BM979607</i>        | -1,11 | 1,14E-01 | 3,38E-01 |
| <i>THC2350793</i>      | -1,10 | 1,14E-01 | 3,38E-01 |
| <i>PREI3</i>           | 1,06  | 1,14E-01 | 3,39E-01 |
| <i>ENST00000334973</i> | -1,17 | 1,14E-01 | 3,39E-01 |
| <i>ZNF579</i>          | 1,08  | 1,14E-01 | 3,39E-01 |
| <i>THC2340346</i>      | 1,06  | 1,14E-01 | 3,39E-01 |
| <i>RNF38</i>           | 1,13  | 1,14E-01 | 3,39E-01 |
| <i>PHOSPHO1</i>        | 1,06  | 1,14E-01 | 3,39E-01 |
| <i>FBXO40</i>          | 1,20  | 1,14E-01 | 3,39E-01 |
| <i>ENST00000354442</i> | -1,11 | 1,14E-01 | 3,39E-01 |
| <i>CSE1L</i>           | -1,05 | 1,14E-01 | 3,39E-01 |
| <i>UPB1</i>            | 1,09  | 1,14E-01 | 3,39E-01 |
| <i>HOXA7</i>           | 1,15  | 1,14E-01 | 3,39E-01 |
| <i>GSTA1</i>           | 1,23  | 1,14E-01 | 3,39E-01 |
| <i>RAB7B</i>           | -1,11 | 1,14E-01 | 3,39E-01 |
| <i>DMP1</i>            | 1,05  | 1,14E-01 | 3,39E-01 |
| <i>BX412469</i>        | 1,07  | 1,14E-01 | 3,39E-01 |
| <i>MGC14327</i>        | -1,08 | 1,14E-01 | 3,39E-01 |
| <i>A_24_P401221</i>    | -1,07 | 1,14E-01 | 3,39E-01 |
| <i>THC2406147</i>      | 1,08  | 1,14E-01 | 3,39E-01 |
| <i>ARID1B</i>          | 1,06  | 1,14E-01 | 3,40E-01 |
| <i>TOLLIP</i>          | 1,06  | 1,14E-01 | 3,40E-01 |
| <i>ENST00000318291</i> | -1,11 | 1,14E-01 | 3,40E-01 |
| <i>DHFRL1</i>          | -1,07 | 1,14E-01 | 3,40E-01 |
| <i>AI090310</i>        | -1,08 | 1,14E-01 | 3,40E-01 |
| <i>THC2306572</i>      | 1,07  | 1,14E-01 | 3,40E-01 |
| <i>A_32_P202082</i>    | -1,06 | 1,14E-01 | 3,40E-01 |

|                        |       |          |          |
|------------------------|-------|----------|----------|
| <i>DB451431</i>        | 1,06  | 1,14E-01 | 3,40E-01 |
| <i>HTATIP</i>          | 1,05  | 1,15E-01 | 3,40E-01 |
| <i>CR597959</i>        | 1,07  | 1,15E-01 | 3,40E-01 |
| <i>PPM1M</i>           | -1,06 | 1,15E-01 | 3,40E-01 |
| <i>A_23_P206826</i>    | -1,05 | 1,15E-01 | 3,40E-01 |
| <i>ENST00000367711</i> | 1,07  | 1,15E-01 | 3,40E-01 |
| <i>ARSB</i>            | 1,07  | 1,15E-01 | 3,40E-01 |
| <i>IL4</i>             | 1,04  | 1,15E-01 | 3,40E-01 |
| <i>THC2319114</i>      | 1,06  | 1,15E-01 | 3,40E-01 |
| <i>CTDSP2</i>          | -1,07 | 1,15E-01 | 3,40E-01 |
| <i>A_32_P159706</i>    | -1,06 | 1,15E-01 | 3,40E-01 |
| <i>A_24_P808595</i>    | 1,05  | 1,15E-01 | 3,40E-01 |
| <i>FOXD4</i>           | 1,06  | 1,15E-01 | 3,40E-01 |
| <i>FAM36A</i>          | 1,10  | 1,15E-01 | 3,40E-01 |
| <i>ENST00000372569</i> | -1,11 | 1,15E-01 | 3,40E-01 |
| <i>ENST00000329615</i> | 1,07  | 1,15E-01 | 3,40E-01 |
| <i>ENST00000380831</i> | 1,07  | 1,15E-01 | 3,40E-01 |
| <i>ENST00000335083</i> | -1,11 | 1,15E-01 | 3,41E-01 |
| <i>GLB1L</i>           | -1,08 | 1,15E-01 | 3,41E-01 |
| <i>THC2335868</i>      | -1,07 | 1,15E-01 | 3,41E-01 |
| <i>TNKS</i>            | -1,05 | 1,15E-01 | 3,41E-01 |
| <i>DNAH5</i>           | 1,05  | 1,15E-01 | 3,41E-01 |
| <i>THC2283658</i>      | 1,06  | 1,15E-01 | 3,41E-01 |
| <i>EPM2A</i>           | 1,08  | 1,15E-01 | 3,41E-01 |
| <i>WDR47</i>           | 1,06  | 1,15E-01 | 3,41E-01 |
| <i>CBR4</i>            | -1,06 | 1,15E-01 | 3,41E-01 |
| <i>TGIF</i>            | -1,10 | 1,15E-01 | 3,41E-01 |
| <i>A_32_P8806</i>      | -1,08 | 1,15E-01 | 3,41E-01 |
| <i>ULK3</i>            | -1,07 | 1,15E-01 | 3,41E-01 |
| <i>THC2404912</i>      | 1,07  | 1,15E-01 | 3,41E-01 |
| <i>A_24_P660797</i>    | 1,09  | 1,15E-01 | 3,41E-01 |
| <i>GINS4</i>           | 1,04  | 1,15E-01 | 3,41E-01 |
| <i>PODN</i>            | -1,11 | 1,15E-01 | 3,41E-01 |
| <i>C15orf33</i>        | -1,06 | 1,15E-01 | 3,41E-01 |
| <i>GRM8</i>            | 1,09  | 1,15E-01 | 3,41E-01 |
| <i>A_24_P933027</i>    | -1,06 | 1,15E-01 | 3,41E-01 |
| <i>THC2285293</i>      | -1,11 | 1,15E-01 | 3,41E-01 |
| <i>ENST00000302942</i> | 1,07  | 1,15E-01 | 3,41E-01 |
| <i>A_23_P9997</i>      | -1,14 | 1,16E-01 | 3,42E-01 |
| <i>NPFFR2</i>          | 1,06  | 1,16E-01 | 3,42E-01 |
| <i>MPHOSPH1</i>        | -1,08 | 1,16E-01 | 3,42E-01 |
| <i>DCD</i>             | 1,06  | 1,16E-01 | 3,42E-01 |
| <i>A_24_P187094</i>    | 1,17  | 1,16E-01 | 3,42E-01 |
| <i>ENST00000381936</i> | -1,09 | 1,16E-01 | 3,42E-01 |



|                        |       |          |          |
|------------------------|-------|----------|----------|
| <i>THC2355927</i>      | -1,11 | 1,16E-01 | 3,42E-01 |
| <i>OR12D3</i>          | -1,05 | 1,16E-01 | 3,42E-01 |
| <i>APTX</i>            | -1,05 | 1,16E-01 | 3,42E-01 |
| <i>C7orf20</i>         | -1,05 | 1,16E-01 | 3,43E-01 |
| <i>POLD2</i>           | 1,05  | 1,16E-01 | 3,43E-01 |
| <i>BF841801</i>        | 1,08  | 1,16E-01 | 3,43E-01 |
| <i>PDLIM3</i>          | 1,45  | 1,16E-01 | 3,43E-01 |
| <i>LYZ</i>             | -1,29 | 1,16E-01 | 3,43E-01 |
| <i>SMC1A</i>           | 1,05  | 1,16E-01 | 3,43E-01 |
| <i>C6orf62</i>         | -1,05 | 1,16E-01 | 3,43E-01 |
| <i>FBLN2</i>           | 1,18  | 1,16E-01 | 3,43E-01 |
| <i>ENST00000292357</i> | -1,08 | 1,16E-01 | 3,43E-01 |
| <i>COX6A1</i>          | 1,06  | 1,16E-01 | 3,43E-01 |
| <i>PPM1G</i>           | 1,05  | 1,16E-01 | 3,43E-01 |
| <i>AK024242</i>        | 1,05  | 1,16E-01 | 3,44E-01 |
| <i>ACTR1B</i>          | 1,04  | 1,16E-01 | 3,44E-01 |
| <i>AK026338</i>        | -1,09 | 1,16E-01 | 3,44E-01 |
| <i>ENST00000356877</i> | -1,06 | 1,17E-01 | 3,44E-01 |
| <i>TP53INP1</i>        | -1,12 | 1,17E-01 | 3,44E-01 |
| <i>GNAQ</i>            | 1,09  | 1,17E-01 | 3,44E-01 |
| <i>KRAS</i>            | 1,05  | 1,17E-01 | 3,44E-01 |
| <i>LOC643273</i>       | 1,08  | 1,17E-01 | 3,44E-01 |
| <i>A_32_P55414</i>     | -1,09 | 1,17E-01 | 3,44E-01 |
| <i>RNF43</i>           | -1,13 | 1,17E-01 | 3,44E-01 |
| <i>FGA</i>             | 1,06  | 1,17E-01 | 3,44E-01 |
| <i>TAS2R38</i>         | -1,07 | 1,17E-01 | 3,44E-01 |
| <i>THC2410157</i>      | -1,09 | 1,17E-01 | 3,44E-01 |
| <i>C14orf148</i>       | 1,06  | 1,17E-01 | 3,44E-01 |
| <i>NFIC</i>            | 1,07  | 1,17E-01 | 3,44E-01 |
| <i>DCTN5</i>           | 1,08  | 1,17E-01 | 3,44E-01 |
| <i>RPL13A</i>          | -1,07 | 1,17E-01 | 3,44E-01 |
| <i>LILRB2</i>          | -1,12 | 1,17E-01 | 3,44E-01 |
| <i>ERCC6</i>           | 1,06  | 1,17E-01 | 3,45E-01 |
| <i>MTBP</i>            | -1,05 | 1,17E-01 | 3,45E-01 |
| <i>CDCP2</i>           | 1,06  | 1,17E-01 | 3,45E-01 |
| <i>MMP11</i>           | -1,20 | 1,17E-01 | 3,45E-01 |
| <i>THC2448556</i>      | -1,09 | 1,17E-01 | 3,45E-01 |
| <i>TMEM68</i>          | -1,05 | 1,17E-01 | 3,45E-01 |
| <i>DPP7</i>            | 1,08  | 1,17E-01 | 3,45E-01 |
| <i>THC2379106</i>      | 1,12  | 1,17E-01 | 3,45E-01 |
| <i>TAF12</i>           | -1,06 | 1,17E-01 | 3,45E-01 |
| <i>VAV3</i>            | -1,21 | 1,17E-01 | 3,45E-01 |
| <i>FLJ42393</i>        | 1,12  | 1,17E-01 | 3,45E-01 |
| <i>ENST00000354261</i> | -1,06 | 1,17E-01 | 3,45E-01 |

|                        |       |          |          |
|------------------------|-------|----------|----------|
| <i>A_24_P933761</i>    | 1,06  | 1,17E-01 | 3,45E-01 |
| <i>PSMD11</i>          | 1,05  | 1,17E-01 | 3,45E-01 |
| <i>KIAA1604</i>        | 1,08  | 1,17E-01 | 3,45E-01 |
| <i>THC2263893</i>      | -1,06 | 1,17E-01 | 3,45E-01 |
| <i>FUT6</i>            | -1,11 | 1,17E-01 | 3,45E-01 |
| <i>EIF3S2</i>          | 1,05  | 1,17E-01 | 3,45E-01 |
| <i>37347</i>           | 1,06  | 1,17E-01 | 3,45E-01 |
| <i>LOC389332</i>       | 1,09  | 1,17E-01 | 3,45E-01 |
| <i>CD8B</i>            | -1,20 | 1,17E-01 | 3,45E-01 |
| <i>CD237413</i>        | -1,15 | 1,17E-01 | 3,45E-01 |
| <i>METRNL</i>          | 1,19  | 1,18E-01 | 3,45E-01 |
| <i>THC2442208</i>      | -1,18 | 1,18E-01 | 3,45E-01 |
| <i>UBE2G2</i>          | 1,06  | 1,18E-01 | 3,45E-01 |
| <i>FAF1</i>            | 1,06  | 1,18E-01 | 3,45E-01 |
| <i>PTK2B</i>           | 1,07  | 1,18E-01 | 3,46E-01 |
| <i>GRM4</i>            | 1,05  | 1,18E-01 | 3,46E-01 |
| <i>SRPRB</i>           | -1,12 | 1,18E-01 | 3,46E-01 |
| <i>LOC92270</i>        | -1,11 | 1,18E-01 | 3,46E-01 |
| <i>ILF3</i>            | -1,05 | 1,18E-01 | 3,46E-01 |
| <i>ENST00000357303</i> | 1,31  | 1,18E-01 | 3,46E-01 |
| <i>B4GALT1</i>         | 1,10  | 1,18E-01 | 3,46E-01 |
| <i>KCTD1</i>           | -1,10 | 1,18E-01 | 3,46E-01 |
| <i>KIAA1324L</i>       | 1,08  | 1,18E-01 | 3,46E-01 |
| <i>LOC90834</i>        | -1,07 | 1,18E-01 | 3,46E-01 |
| <i>NEFH</i>            | -1,23 | 1,18E-01 | 3,46E-01 |
| <i>A_24_P7750</i>      | -1,05 | 1,18E-01 | 3,46E-01 |
| <i>A_32_P230059</i>    | 1,09  | 1,18E-01 | 3,46E-01 |
| <i>SLC6A3</i>          | 1,06  | 1,18E-01 | 3,46E-01 |
| <i>A_24_P725365</i>    | -1,08 | 1,18E-01 | 3,46E-01 |
| <i>A_24_P467805</i>    | -1,10 | 1,18E-01 | 3,46E-01 |
| <i>ENST00000259969</i> | -1,05 | 1,18E-01 | 3,46E-01 |
| <i>WDR53</i>           | -1,07 | 1,18E-01 | 3,47E-01 |
| <i>LOC647174</i>       | -1,06 | 1,18E-01 | 3,47E-01 |
| <i>HSPA2</i>           | 1,15  | 1,18E-01 | 3,47E-01 |
| <i>RAB3IL1</i>         | -1,09 | 1,18E-01 | 3,47E-01 |
| <i>AKO21689</i>        | -1,10 | 1,18E-01 | 3,47E-01 |
| <i>PCNX</i>            | 1,07  | 1,18E-01 | 3,47E-01 |
| <i>A_24_P255654</i>    | 1,11  | 1,18E-01 | 3,47E-01 |
| <i>CAV1</i>            | 1,08  | 1,18E-01 | 3,47E-01 |
| <i>ARHGEF16</i>        | 1,13  | 1,18E-01 | 3,47E-01 |
| <i>ENST00000311061</i> | -1,06 | 1,18E-01 | 3,47E-01 |
| <i>A_24_P932046</i>    | 1,05  | 1,18E-01 | 3,47E-01 |
| <i>ZNF136</i>          | 1,06  | 1,18E-01 | 3,47E-01 |
| <i>C11orf70</i>        | -1,10 | 1,18E-01 | 3,47E-01 |

|                        |       |          |          |
|------------------------|-------|----------|----------|
| <i>MKX</i>             | -1,15 | 1,19E-01 | 3,47E-01 |
| <i>COQ3</i>            | -1,10 | 1,19E-01 | 3,47E-01 |
| <i>THC2404289</i>      | -1,09 | 1,19E-01 | 3,47E-01 |
| <i>AL080134</i>        | -1,08 | 1,19E-01 | 3,47E-01 |
| <i>IKBKB</i>           | -1,06 | 1,19E-01 | 3,47E-01 |
| <i>CCR3</i>            | 1,04  | 1,19E-01 | 3,47E-01 |
| <i>KBTBD5</i>          | 1,06  | 1,19E-01 | 3,47E-01 |
| <i>NYD-SP26</i>        | 1,06  | 1,19E-01 | 3,47E-01 |
| <i>RP13-153N15.1</i>   | 1,06  | 1,19E-01 | 3,47E-01 |
| <i>LOC643386</i>       | 1,09  | 1,18E-01 | 3,47E-01 |
| <i>A_24_P670342</i>    | 1,15  | 1,18E-01 | 3,47E-01 |
| <i>AW405469</i>        | 1,06  | 1,19E-01 | 3,47E-01 |
| <i>NAP1L2</i>          | -1,14 | 1,19E-01 | 3,47E-01 |
| <i>HPCA</i>            | -1,10 | 1,19E-01 | 3,48E-01 |
| <i>FAM104B</i>         | 1,07  | 1,19E-01 | 3,48E-01 |
| <i>VIL1</i>            | 1,05  | 1,19E-01 | 3,48E-01 |
| <i>ZFP106</i>          | -1,07 | 1,19E-01 | 3,48E-01 |
| <i>ENST00000264903</i> | 1,09  | 1,19E-01 | 3,48E-01 |
| <i>FLJ12993</i>        | 1,13  | 1,19E-01 | 3,48E-01 |
| <i>A_32_P231427</i>    | -1,07 | 1,19E-01 | 3,48E-01 |
| <i>MGC5509</i>         | 1,05  | 1,19E-01 | 3,48E-01 |
| <i>CTPS2</i>           | 1,06  | 1,19E-01 | 3,48E-01 |
| <i>A_32_P36075</i>     | -1,07 | 1,19E-01 | 3,48E-01 |
| <i>CAMSAP1L1</i>       | -1,09 | 1,19E-01 | 3,48E-01 |
| <i>KLHL14</i>          | -1,09 | 1,19E-01 | 3,48E-01 |
| <i>HUS1</i>            | 1,06  | 1,19E-01 | 3,48E-01 |
| <i>RPL11</i>           | -1,05 | 1,19E-01 | 3,48E-01 |
| <i>ENST00000380239</i> | -1,30 | 1,19E-01 | 3,48E-01 |
| <i>PLCB1</i>           | 1,11  | 1,19E-01 | 3,48E-01 |
| <i>C8orf71</i>         | 1,06  | 1,19E-01 | 3,48E-01 |
| <i>AA644703</i>        | -1,06 | 1,19E-01 | 3,49E-01 |
| <i>LITAF</i>           | 1,10  | 1,19E-01 | 3,49E-01 |
| <i>A_24_P882666</i>    | 1,16  | 1,19E-01 | 3,49E-01 |
| <i>LOC653319</i>       | -1,10 | 1,19E-01 | 3,49E-01 |
| <i>THC2341338</i>      | 1,05  | 1,19E-01 | 3,49E-01 |
| <i>NHLH2</i>           | 1,07  | 1,19E-01 | 3,49E-01 |
| <i>A_24_P161393</i>    | 1,11  | 1,19E-01 | 3,49E-01 |
| <i>ENST00000272831</i> | -1,05 | 1,19E-01 | 3,49E-01 |
| <i>HMG4L</i>           | 1,10  | 1,19E-01 | 3,49E-01 |
| <i>A_32_P225916</i>    | 1,09  | 1,20E-01 | 3,49E-01 |
| <i>BIRC4BP</i>         | -1,10 | 1,20E-01 | 3,49E-01 |
| <i>C10orf13</i>        | -1,06 | 1,20E-01 | 3,49E-01 |
| <i>AI003989</i>        | 1,07  | 1,20E-01 | 3,49E-01 |
| <i>TMEM17</i>          | -1,06 | 1,20E-01 | 3,49E-01 |

|                        |       |          |          |
|------------------------|-------|----------|----------|
| <i>UBQLN1</i>          | 1,05  | 1,20E-01 | 3,49E-01 |
| <i>A_24_P935747</i>    | 1,07  | 1,20E-01 | 3,49E-01 |
| <i>GPRASP1</i>         | -1,12 | 1,20E-01 | 3,49E-01 |
| <i>AK025573</i>        | -1,06 | 1,20E-01 | 3,49E-01 |
| <i>AB027122</i>        | 1,05  | 1,20E-01 | 3,49E-01 |
| <i>A_24_P552677</i>    | 1,05  | 1,20E-01 | 3,49E-01 |
| <i>TCEB3</i>           | 1,07  | 1,20E-01 | 3,49E-01 |
| <i>BHMT2</i>           | 1,13  | 1,20E-01 | 3,49E-01 |
| <i>ITPK1</i>           | -1,14 | 1,20E-01 | 3,49E-01 |
| <i>STAG1</i>           | 1,07  | 1,20E-01 | 3,49E-01 |
| <i>LIPF</i>            | -1,05 | 1,20E-01 | 3,49E-01 |
| <i>C14orf103</i>       | -1,05 | 1,20E-01 | 3,49E-01 |
| <i>LOC201725</i>       | -1,06 | 1,20E-01 | 3,50E-01 |
| <i>GSTA5</i>           | 1,25  | 1,20E-01 | 3,50E-01 |
| <i>PTTG2</i>           | -1,08 | 1,20E-01 | 3,50E-01 |
| <i>THC2440422</i>      | -1,10 | 1,20E-01 | 3,50E-01 |
| <i>LY75</i>            | -1,12 | 1,20E-01 | 3,50E-01 |
| <i>C11orf1</i>         | -1,05 | 1,20E-01 | 3,50E-01 |
| <i>VSIG1</i>           | 1,05  | 1,20E-01 | 3,50E-01 |
| <i>ASCL1</i>           | 1,08  | 1,20E-01 | 3,50E-01 |
| <i>A_24_P921062</i>    | 1,04  | 1,20E-01 | 3,50E-01 |
| <i>THC2338993</i>      | 1,11  | 1,20E-01 | 3,50E-01 |
| <i>TIMELESS</i>        | -1,08 | 1,20E-01 | 3,50E-01 |
| <i>IFI35</i>           | 1,07  | 1,20E-01 | 3,50E-01 |
| <i>CTSL2</i>           | 1,67  | 1,20E-01 | 3,50E-01 |
| <i>CCNE2</i>           | -1,06 | 1,20E-01 | 3,50E-01 |
| <i>ANKZF1</i>          | -1,08 | 1,20E-01 | 3,50E-01 |
| <i>A_23_P56868</i>     | -1,07 | 1,20E-01 | 3,50E-01 |
| <i>ABHD4</i>           | 1,06  | 1,20E-01 | 3,51E-01 |
| <i>LIN28B</i>          | 1,05  | 1,21E-01 | 3,51E-01 |
| <i>A_32_P183656</i>    | 1,06  | 1,21E-01 | 3,51E-01 |
| <i>MTFR1</i>           | 1,06  | 1,21E-01 | 3,51E-01 |
| <i>VPS25</i>           | -1,12 | 1,21E-01 | 3,51E-01 |
| <i>STOX2</i>           | 1,08  | 1,21E-01 | 3,51E-01 |
| <i>BC034423</i>        | -1,07 | 1,21E-01 | 3,51E-01 |
| <i>ZNF330</i>          | -1,07 | 1,21E-01 | 3,51E-01 |
| <i>ENST00000269290</i> | 1,06  | 1,21E-01 | 3,51E-01 |
| <i>BC032036</i>        | 1,08  | 1,21E-01 | 3,51E-01 |
| <i>U63542</i>          | 1,09  | 1,21E-01 | 3,51E-01 |
| <i>ARFGEF1</i>         | -1,06 | 1,21E-01 | 3,51E-01 |
| <i>BG989839</i>        | 1,06  | 1,21E-01 | 3,51E-01 |
| <i>A_24_P41530</i>     | 1,13  | 1,21E-01 | 3,51E-01 |
| <i>ENST00000333351</i> | -1,06 | 1,21E-01 | 3,51E-01 |
| <i>THC2274733</i>      | -1,09 | 1,21E-01 | 3,51E-01 |

|                        |       |          |          |
|------------------------|-------|----------|----------|
| <i>PRB1</i>            | 1,06  | 1,21E-01 | 3,51E-01 |
| <i>LRR32</i>           | 1,15  | 1,21E-01 | 3,51E-01 |
| <i>A_24_P911310</i>    | 1,06  | 1,21E-01 | 3,51E-01 |
| <i>PHOSPHO2</i>        | -1,12 | 1,21E-01 | 3,51E-01 |
| <i>BC091525</i>        | -1,15 | 1,21E-01 | 3,51E-01 |
| <i>PTPLB</i>           | 1,06  | 1,21E-01 | 3,51E-01 |
| <i>DARS2</i>           | -1,08 | 1,21E-01 | 3,51E-01 |
| <i>BC028846</i>        | -1,06 | 1,21E-01 | 3,51E-01 |
| <i>AF086126</i>        | -1,04 | 1,21E-01 | 3,51E-01 |
| <i>RNASEH1</i>         | 1,05  | 1,21E-01 | 3,51E-01 |
| <i>BC000772</i>        | 1,05  | 1,21E-01 | 3,51E-01 |
| <i>CR609146</i>        | 1,27  | 1,21E-01 | 3,51E-01 |
| <i>DND1</i>            | -1,11 | 1,21E-01 | 3,52E-01 |
| <i>LOC284739</i>       | 1,06  | 1,21E-01 | 3,52E-01 |
| <i>BC018597</i>        | 1,17  | 1,21E-01 | 3,52E-01 |
| <i>PIP5K1B</i>         | 1,17  | 1,21E-01 | 3,52E-01 |
| <i>SLC4A11</i>         | 1,07  | 1,21E-01 | 3,52E-01 |
| <i>C9orf50</i>         | 1,07  | 1,21E-01 | 3,52E-01 |
| <i>RASIP1</i>          | 1,12  | 1,21E-01 | 3,52E-01 |
| <i>TTC17</i>           | -1,04 | 1,21E-01 | 3,52E-01 |
| <i>APOC4</i>           | 1,05  | 1,21E-01 | 3,52E-01 |
| <i>BQ337821</i>        | 1,06  | 1,21E-01 | 3,52E-01 |
| <i>DNAI1</i>           | -1,06 | 1,21E-01 | 3,52E-01 |
| <i>ZNF441</i>          | -1,08 | 1,21E-01 | 3,52E-01 |
| <i>SMA5</i>            | -1,14 | 1,22E-01 | 3,52E-01 |
| <i>LOC399959</i>       | -1,12 | 1,22E-01 | 3,52E-01 |
| <i>BRPF1</i>           | -1,05 | 1,22E-01 | 3,52E-01 |
| <i>FBXL21</i>          | 1,04  | 1,22E-01 | 3,52E-01 |
| <i>ENST00000238875</i> | 1,08  | 1,22E-01 | 3,52E-01 |
| <i>CLINT1</i>          | -1,06 | 1,22E-01 | 3,52E-01 |
| <i>KIAA1161</i>        | -1,05 | 1,22E-01 | 3,52E-01 |
| <i>AF007136</i>        | 1,06  | 1,22E-01 | 3,52E-01 |
| <i>ENST00000377492</i> | -1,11 | 1,22E-01 | 3,53E-01 |
| <i>MTP18</i>           | 1,08  | 1,22E-01 | 3,53E-01 |
| <i>AK123704</i>        | 1,09  | 1,22E-01 | 3,53E-01 |
| <i>LOC54103</i>        | -1,08 | 1,22E-01 | 3,53E-01 |
| <i>SCNN1G</i>          | -1,06 | 1,22E-01 | 3,53E-01 |
| <i>THC2339346</i>      | 1,05  | 1,22E-01 | 3,53E-01 |
| <i>AKR7A3</i>          | -1,10 | 1,22E-01 | 3,53E-01 |
| <i>BM806490</i>        | -1,06 | 1,22E-01 | 3,53E-01 |
| <i>JRK</i>             | -1,06 | 1,22E-01 | 3,53E-01 |
| <i>PPP2R5E</i>         | 1,06  | 1,22E-01 | 3,53E-01 |
| <i>RAP1B</i>           | 1,07  | 1,22E-01 | 3,53E-01 |
| <i>RAPGEF5</i>         | 1,10  | 1,22E-01 | 3,53E-01 |

|                        |       |          |          |
|------------------------|-------|----------|----------|
| <i>AI659667</i>        | 1,17  | 1,22E-01 | 3,53E-01 |
| <i>AK094629</i>        | 1,26  | 1,22E-01 | 3,53E-01 |
| <i>FPRL2</i>           | 1,14  | 1,22E-01 | 3,53E-01 |
| <i>HRSP12</i>          | -1,08 | 1,22E-01 | 3,53E-01 |
| <i>VPS45A</i>          | -1,07 | 1,22E-01 | 3,53E-01 |
| <i>LOC283932</i>       | 1,07  | 1,22E-01 | 3,53E-01 |
| <i>GLA</i>             | 1,07  | 1,22E-01 | 3,53E-01 |
| <i>A_24_P489399</i>    | 1,09  | 1,22E-01 | 3,53E-01 |
| <i>N4BP3</i>           | -1,08 | 1,22E-01 | 3,53E-01 |
| <i>USP8</i>            | -1,07 | 1,22E-01 | 3,53E-01 |
| <i>GANAB</i>           | -1,06 | 1,22E-01 | 3,53E-01 |
| <i>LOC222171</i>       | 1,05  | 1,22E-01 | 3,53E-01 |
| <i>A_32_P867077</i>    | 1,08  | 1,22E-01 | 3,53E-01 |
| <i>MLLT4</i>           | -1,05 | 1,22E-01 | 3,53E-01 |
| <i>ENST00000361972</i> | -1,12 | 1,22E-01 | 3,53E-01 |
| <i>A_24_P666795</i>    | -1,06 | 1,22E-01 | 3,53E-01 |
| <i>RAP1GDS1</i>        | 1,06  | 1,22E-01 | 3,53E-01 |
| <i>NHLRC2</i>          | -1,06 | 1,22E-01 | 3,53E-01 |
| <i>LOC114984</i>       | 1,06  | 1,22E-01 | 3,54E-01 |
| <i>AI123606</i>        | -1,10 | 1,22E-01 | 3,54E-01 |
| <i>C14orf56</i>        | -1,10 | 1,22E-01 | 3,54E-01 |
| <i>THC2360052</i>      | 1,06  | 1,22E-01 | 3,54E-01 |
| <i>ENST00000371142</i> | 1,05  | 1,23E-01 | 3,54E-01 |
| <i>GUCY2F</i>          | -1,19 | 1,23E-01 | 3,54E-01 |
| <i>THC2289112</i>      | -1,08 | 1,23E-01 | 3,54E-01 |
| <i>OR5L2</i>           | 1,08  | 1,23E-01 | 3,54E-01 |
| <i>FCN2</i>            | -1,08 | 1,23E-01 | 3,54E-01 |
| <i>NDUFA10</i>         | 1,07  | 1,23E-01 | 3,54E-01 |
| <i>SPRED2</i>          | -1,07 | 1,23E-01 | 3,54E-01 |
| <i>SMC2</i>            | -1,11 | 1,23E-01 | 3,54E-01 |
| <i>THC2382362</i>      | -1,08 | 1,23E-01 | 3,54E-01 |
| <i>THC2324252</i>      | -1,07 | 1,23E-01 | 3,54E-01 |
| <i>DEFB129</i>         | 1,05  | 1,23E-01 | 3,54E-01 |
| <i>TNKS1BP1</i>        | 1,06  | 1,23E-01 | 3,54E-01 |
| <i>ENST00000344320</i> | 1,06  | 1,23E-01 | 3,54E-01 |
| <i>POPDC3</i>          | 1,11  | 1,23E-01 | 3,54E-01 |
| <i>DPYSL3</i>          | 1,16  | 1,23E-01 | 3,54E-01 |
| <i>CACNG6</i>          | 1,06  | 1,23E-01 | 3,54E-01 |
| <i>THC2316547</i>      | 1,06  | 1,23E-01 | 3,54E-01 |
| <i>CA436590</i>        | 1,08  | 1,23E-01 | 3,55E-01 |
| <i>THC2409152</i>      | -1,07 | 1,23E-01 | 3,55E-01 |
| <i>MTRF1</i>           | -1,06 | 1,23E-01 | 3,55E-01 |
| <i>FLJ35773</i>        | -1,08 | 1,23E-01 | 3,55E-01 |
| <i>SFTPC</i>           | 1,11  | 1,23E-01 | 3,55E-01 |

|                 |       |          |          |
|-----------------|-------|----------|----------|
| AY730280        | -1,06 | 1,23E-01 | 3,55E-01 |
| DHX15           | -1,06 | 1,23E-01 | 3,55E-01 |
| LOC401010       | -1,06 | 1,23E-01 | 3,55E-01 |
| AI732974        | -1,05 | 1,23E-01 | 3,55E-01 |
| A_32_P221437    | -1,05 | 1,23E-01 | 3,55E-01 |
| TRIM62          | 1,04  | 1,23E-01 | 3,55E-01 |
| BG413401        | -1,06 | 1,23E-01 | 3,55E-01 |
| THC2404429      | -1,16 | 1,23E-01 | 3,55E-01 |
| VHL             | -1,14 | 1,23E-01 | 3,55E-01 |
| ENST00000381826 | 1,06  | 1,23E-01 | 3,55E-01 |
| AF281279        | 1,08  | 1,23E-01 | 3,55E-01 |
| ENST00000310692 | 1,19  | 1,23E-01 | 3,55E-01 |
| THC2439228      | 1,06  | 1,23E-01 | 3,55E-01 |
| THC2319814      | -1,06 | 1,24E-01 | 3,56E-01 |
| SAA2            | -1,09 | 1,24E-01 | 3,56E-01 |
| HMGB3           | -1,09 | 1,24E-01 | 3,56E-01 |
| TTL4            | 1,06  | 1,24E-01 | 3,56E-01 |
| CEBPZ           | 1,06  | 1,24E-01 | 3,56E-01 |
| PSMD2           | 1,07  | 1,24E-01 | 3,56E-01 |
| FAM46D          | -1,06 | 1,24E-01 | 3,56E-01 |
| A_24_P918608    | -1,07 | 1,24E-01 | 3,56E-01 |
| A_23_P170427    | 1,06  | 1,24E-01 | 3,56E-01 |
| LOC153561       | -1,21 | 1,24E-01 | 3,56E-01 |
| THC2404488      | -1,12 | 1,24E-01 | 3,56E-01 |
| LOC55908        | -1,06 | 1,24E-01 | 3,56E-01 |
| BE612504        | -1,11 | 1,24E-01 | 3,56E-01 |
| BG943680        | 1,06  | 1,24E-01 | 3,57E-01 |
| BSPRY           | -1,11 | 1,24E-01 | 3,57E-01 |
| CCDC44          | -1,07 | 1,24E-01 | 3,57E-01 |
| THC2271717      | 1,09  | 1,24E-01 | 3,57E-01 |
| A_32_P138908    | 1,05  | 1,24E-01 | 3,57E-01 |
| CCDC56          | -1,05 | 1,24E-01 | 3,57E-01 |
| KCNK5           | 1,16  | 1,24E-01 | 3,57E-01 |
| LOC161931       | 1,16  | 1,24E-01 | 3,57E-01 |
| PARC            | -1,05 | 1,24E-01 | 3,57E-01 |
| SMYD3           | 1,07  | 1,24E-01 | 3,57E-01 |
| THC2380750      | -1,18 | 1,24E-01 | 3,57E-01 |
| KARCA1          | -1,17 | 1,24E-01 | 3,57E-01 |
| LOC646486       | -1,07 | 1,24E-01 | 3,57E-01 |
| RAB3GAP1        | 1,07  | 1,24E-01 | 3,57E-01 |
| BF477426        | -1,07 | 1,25E-01 | 3,58E-01 |
| A_32_P158253    | -1,06 | 1,25E-01 | 3,58E-01 |
| BC036622        | -1,10 | 1,25E-01 | 3,58E-01 |
| A_24_P716349    | 1,04  | 1,25E-01 | 3,58E-01 |

|                        |       |          |          |
|------------------------|-------|----------|----------|
| <i>BX394393</i>        | 1,07  | 1,25E-01 | 3,58E-01 |
| <i>OTOA</i>            | -1,06 | 1,25E-01 | 3,58E-01 |
| <i>UFC1</i>            | 1,05  | 1,25E-01 | 3,58E-01 |
| <i>ZNF486</i>          | -1,09 | 1,25E-01 | 3,58E-01 |
| <i>C16orf44</i>        | 1,05  | 1,25E-01 | 3,58E-01 |
| <i>KATNAL1</i>         | 1,06  | 1,25E-01 | 3,58E-01 |
| <i>LOC646791</i>       | 1,10  | 1,25E-01 | 3,58E-01 |
| <i>BQ286187</i>        | 1,06  | 1,25E-01 | 3,58E-01 |
| <i>SP3</i>             | -1,08 | 1,25E-01 | 3,58E-01 |
| <i>ENST00000290786</i> | 1,06  | 1,25E-01 | 3,58E-01 |
| <i>LOC401351</i>       | 1,06  | 1,25E-01 | 3,58E-01 |
| <i>PPM1D</i>           | 1,09  | 1,25E-01 | 3,58E-01 |
| <i>RPA4</i>            | 1,29  | 1,25E-01 | 3,58E-01 |
| <i>AL137566</i>        | -1,23 | 1,25E-01 | 3,58E-01 |
| <i>GBP5</i>            | -1,21 | 1,25E-01 | 3,58E-01 |
| <i>THC2320257</i>      | -1,14 | 1,25E-01 | 3,58E-01 |
| <i>SLC7A3</i>          | -1,09 | 1,25E-01 | 3,58E-01 |
| <i>ENST00000355691</i> | -1,07 | 1,25E-01 | 3,58E-01 |
| <i>RUNDC1</i>          | 1,12  | 1,25E-01 | 3,58E-01 |
| <i>ERBB3</i>           | 1,13  | 1,25E-01 | 3,58E-01 |
| <i>CAPN3</i>           | -1,07 | 1,25E-01 | 3,58E-01 |
| <i>A_24_P717262</i>    | -1,07 | 1,25E-01 | 3,58E-01 |
| <i>SOX9</i>            | -1,06 | 1,25E-01 | 3,58E-01 |
| <i>A_24_P401069</i>    | -1,05 | 1,25E-01 | 3,58E-01 |
| <i>SLC6A12</i>         | 1,22  | 1,25E-01 | 3,58E-01 |
| <i>SLC25A20</i>        | -1,10 | 1,25E-01 | 3,59E-01 |
| <i>AK055641</i>        | -1,10 | 1,25E-01 | 3,59E-01 |
| <i>A_24_P33552</i>     | -1,06 | 1,25E-01 | 3,59E-01 |
| <i>A_32_P101195</i>    | 1,07  | 1,25E-01 | 3,59E-01 |
| <i>FKRP</i>            | 1,08  | 1,25E-01 | 3,59E-01 |
| <i>KCNJ14</i>          | 1,13  | 1,25E-01 | 3,59E-01 |
| <i>VNN1</i>            | -1,07 | 1,25E-01 | 3,59E-01 |
| <i>SYT13</i>           | -1,23 | 1,25E-01 | 3,59E-01 |
| <i>BC090057</i>        | -1,07 | 1,25E-01 | 3,59E-01 |
| <i>CENPB</i>           | 1,06  | 1,25E-01 | 3,59E-01 |
| <i>THC2270072</i>      | 1,07  | 1,25E-01 | 3,59E-01 |
| <i>PPP5C</i>           | 1,07  | 1,25E-01 | 3,59E-01 |
| <i>PHLPPL</i>          | -1,09 | 1,25E-01 | 3,59E-01 |
| <i>PODXL2</i>          | -1,06 | 1,25E-01 | 3,59E-01 |
| <i>GLULD1</i>          | 1,06  | 1,25E-01 | 3,59E-01 |
| <i>LOC644422</i>       | 1,06  | 1,25E-01 | 3,59E-01 |
| <i>TRAM1</i>           | -1,09 | 1,26E-01 | 3,59E-01 |
| <i>THC2373625</i>      | -1,07 | 1,26E-01 | 3,59E-01 |
| <i>A_24_P298238</i>    | -1,06 | 1,26E-01 | 3,59E-01 |



|                        |       |          |          |
|------------------------|-------|----------|----------|
| <i>A_23_P143676</i>    | 1,07  | 1,26E-01 | 3,59E-01 |
| <i>C1orf38</i>         | 1,17  | 1,26E-01 | 3,59E-01 |
| <i>R78313</i>          | -1,08 | 1,26E-01 | 3,59E-01 |
| <i>RAVER1</i>          | 1,07  | 1,26E-01 | 3,59E-01 |
| <i>BX377179</i>        | -1,11 | 1,26E-01 | 3,59E-01 |
| <i>BM807051</i>        | -1,08 | 1,26E-01 | 3,59E-01 |
| <i>KHDRBS1</i>         | -1,06 | 1,26E-01 | 3,59E-01 |
| <i>KIAA0888</i>        | -1,11 | 1,26E-01 | 3,59E-01 |
| <i>ARFGAP1</i>         | -1,08 | 1,26E-01 | 3,59E-01 |
| <i>PHF14</i>           | -1,06 | 1,26E-01 | 3,59E-01 |
| <i>A_24_P799680</i>    | -1,12 | 1,26E-01 | 3,59E-01 |
| <i>SCNN1A</i>          | -1,10 | 1,26E-01 | 3,59E-01 |
| <i>NOS1AP</i>          | -1,09 | 1,26E-01 | 3,59E-01 |
| <i>BC004969</i>        | -1,07 | 1,26E-01 | 3,59E-01 |
| <i>A_23_P258108</i>    | -1,06 | 1,26E-01 | 3,59E-01 |
| <i>FLJ32745</i>        | -1,04 | 1,26E-01 | 3,59E-01 |
| <i>A_32_P152603</i>    | -1,08 | 1,26E-01 | 3,59E-01 |
| <i>ENST00000372866</i> | 1,06  | 1,26E-01 | 3,59E-01 |
| <i>U49441</i>          | 1,07  | 1,26E-01 | 3,59E-01 |
| <i>LGI1</i>            | 1,18  | 1,26E-01 | 3,59E-01 |
| <i>PKM2</i>            | 1,11  | 1,26E-01 | 3,59E-01 |
| <i>AA743218</i>        | -1,11 | 1,26E-01 | 3,59E-01 |
| <i>FLJ21767</i>        | -1,07 | 1,26E-01 | 3,59E-01 |
| <i>NEK4</i>            | -1,07 | 1,26E-01 | 3,59E-01 |
| <i>MGC5370</i>         | 1,05  | 1,26E-01 | 3,59E-01 |
| <i>PPP1R2P1</i>        | 1,05  | 1,26E-01 | 3,59E-01 |
| <i>A_24_P637226</i>    | 1,06  | 1,26E-01 | 3,59E-01 |
| <i>MAPKBP1</i>         | 1,09  | 1,26E-01 | 3,59E-01 |
| <i>THC2341129</i>      | -1,07 | 1,26E-01 | 3,59E-01 |
| <i>AL834536</i>        | -1,06 | 1,26E-01 | 3,59E-01 |
| <i>A_32_P233713</i>    | 1,09  | 1,26E-01 | 3,59E-01 |
| <i>HNRPAB</i>          | 1,08  | 1,26E-01 | 3,60E-01 |
| <i>THC2453346</i>      | -1,08 | 1,26E-01 | 3,60E-01 |
| <i>A_24_P640261</i>    | 1,07  | 1,26E-01 | 3,60E-01 |
| <i>GLIPR1L1</i>        | -1,04 | 1,26E-01 | 3,60E-01 |
| <i>DOCK6</i>           | 1,07  | 1,26E-01 | 3,60E-01 |
| <i>LOXHD1</i>          | 1,04  | 1,26E-01 | 3,60E-01 |
| <i>KRTAP4-2</i>        | 1,05  | 1,26E-01 | 3,60E-01 |
| <i>NPLOC4</i>          | 1,05  | 1,26E-01 | 3,60E-01 |
| <i>KPTN</i>            | 1,06  | 1,26E-01 | 3,60E-01 |
| <i>SOX10</i>           | 1,14  | 1,26E-01 | 3,60E-01 |
| <i>ZNF259</i>          | 1,07  | 1,26E-01 | 3,60E-01 |
| <i>THC2400198</i>      | 1,08  | 1,26E-01 | 3,60E-01 |
| <i>C19orf47</i>        | 1,06  | 1,26E-01 | 3,60E-01 |

|                        |       |          |          |
|------------------------|-------|----------|----------|
| <i>AK026881</i>        | -1,09 | 1,27E-01 | 3,60E-01 |
| <i>WDR66</i>           | -1,16 | 1,27E-01 | 3,60E-01 |
| <i>ANKRD47</i>         | 1,11  | 1,27E-01 | 3,60E-01 |
| <i>OLFML3</i>          | -1,14 | 1,27E-01 | 3,60E-01 |
| <i>VAPA</i>            | 1,05  | 1,27E-01 | 3,60E-01 |
| <i>NPY5R</i>           | -1,09 | 1,27E-01 | 3,60E-01 |
| <i>DPP3</i>            | 1,09  | 1,27E-01 | 3,60E-01 |
| <i>AW979273</i>        | -1,19 | 1,27E-01 | 3,61E-01 |
| <i>THC2406576</i>      | 1,12  | 1,27E-01 | 3,61E-01 |
| <i>THC2302062</i>      | -1,13 | 1,27E-01 | 3,61E-01 |
| <i>BC027847</i>        | 1,07  | 1,27E-01 | 3,61E-01 |
| <i>SEC24D</i>          | -1,13 | 1,27E-01 | 3,61E-01 |
| <i>MDGA1</i>           | -1,11 | 1,27E-01 | 3,61E-01 |
| <i>LOC221143</i>       | -1,05 | 1,27E-01 | 3,61E-01 |
| <i>LOC400890</i>       | -1,10 | 1,27E-01 | 3,61E-01 |
| <i>IRF2</i>            | -1,07 | 1,27E-01 | 3,61E-01 |
| <i>AATF</i>            | 1,06  | 1,27E-01 | 3,61E-01 |
| <i>C18orf19</i>        | -1,07 | 1,27E-01 | 3,61E-01 |
| <i>PSRC1</i>           | 1,19  | 1,27E-01 | 3,61E-01 |
| <i>SLC1A4</i>          | -1,10 | 1,27E-01 | 3,61E-01 |
| <i>K5B</i>             | -1,25 | 1,27E-01 | 3,61E-01 |
| <i>AF086376</i>        | -1,10 | 1,27E-01 | 3,61E-01 |
| <i>AK021897</i>        | -1,08 | 1,27E-01 | 3,61E-01 |
| <i>RABGEF1</i>         | 1,04  | 1,27E-01 | 3,61E-01 |
| <i>CR593845</i>        | 1,05  | 1,27E-01 | 3,61E-01 |
| <i>AK074678</i>        | 1,06  | 1,27E-01 | 3,61E-01 |
| <i>CRI1</i>            | 1,07  | 1,27E-01 | 3,61E-01 |
| <i>IFRD2</i>           | 1,08  | 1,27E-01 | 3,61E-01 |
| <i>ENST00000379285</i> | 1,07  | 1,27E-01 | 3,61E-01 |
| <i>G30</i>             | 1,06  | 1,27E-01 | 3,61E-01 |
| <i>A_24_P934971</i>    | 1,06  | 1,27E-01 | 3,61E-01 |
| <i>ENST00000370548</i> | 1,19  | 1,27E-01 | 3,61E-01 |
| <i>CUTC</i>            | 1,07  | 1,27E-01 | 3,61E-01 |
| <i>HK3</i>             | -1,07 | 1,27E-01 | 3,61E-01 |
| <i>A_24_P452293</i>    | -1,06 | 1,27E-01 | 3,62E-01 |
| <i>GRB14</i>           | -1,66 | 1,27E-01 | 3,62E-01 |
| <i>A_32_P13852</i>     | -1,06 | 1,27E-01 | 3,62E-01 |
| <i>OR2H2</i>           | 1,04  | 1,28E-01 | 3,62E-01 |
| <i>UBL7</i>            | 1,06  | 1,28E-01 | 3,62E-01 |
| <i>A_24_P247233</i>    | 1,17  | 1,28E-01 | 3,62E-01 |
| <i>ADH4</i>            | 1,16  | 1,28E-01 | 3,62E-01 |
| <i>CDH8</i>            | -1,06 | 1,28E-01 | 3,62E-01 |
| <i>AMAC1L2</i>         | 1,09  | 1,28E-01 | 3,62E-01 |
| <i>PISD</i>            | -1,07 | 1,28E-01 | 3,62E-01 |

|                        |       |          |          |
|------------------------|-------|----------|----------|
| <i>LOC644450</i>       | -1,18 | 1,28E-01 | 3,62E-01 |
| <i>AMACR</i>           | -1,09 | 1,28E-01 | 3,62E-01 |
| <i>PFAS</i>            | -1,08 | 1,28E-01 | 3,62E-01 |
| <i>TARBP1</i>          | -1,08 | 1,28E-01 | 3,62E-01 |
| <i>SPATS1</i>          | -1,06 | 1,28E-01 | 3,62E-01 |
| <i>A_24_P915566</i>    | -1,06 | 1,28E-01 | 3,62E-01 |
| <i>ITGAM</i>           | -1,14 | 1,28E-01 | 3,62E-01 |
| <i>LOC619190</i>       | 1,07  | 1,28E-01 | 3,62E-01 |
| <i>INS</i>             | 1,05  | 1,28E-01 | 3,62E-01 |
| <i>C4orf13</i>         | -1,06 | 1,28E-01 | 3,63E-01 |
| <i>ENST00000376087</i> | -1,08 | 1,28E-01 | 3,63E-01 |
| <i>A_24_P32930</i>     | 1,06  | 1,28E-01 | 3,63E-01 |
| <i>THC2339002</i>      | 1,16  | 1,28E-01 | 3,63E-01 |
| <i>A_32_P121640</i>    | 1,08  | 1,28E-01 | 3,63E-01 |
| <i>THC2243400</i>      | -1,04 | 1,28E-01 | 3,63E-01 |
| <i>LOC90246</i>        | -1,09 | 1,28E-01 | 3,63E-01 |
| <i>SPCS2</i>           | -1,08 | 1,28E-01 | 3,63E-01 |
| <i>NOL10</i>           | 1,05  | 1,28E-01 | 3,63E-01 |
| <i>LOC96610</i>        | 1,08  | 1,28E-01 | 3,63E-01 |
| <i>ACCN5</i>           | -1,08 | 1,28E-01 | 3,63E-01 |
| <i>RHPN2</i>           | 1,10  | 1,28E-01 | 3,63E-01 |
| <i>AF034176</i>        | -1,09 | 1,28E-01 | 3,64E-01 |
| <i>AK091192</i>        | -1,06 | 1,28E-01 | 3,64E-01 |
| <i>SPAG10</i>          | 1,05  | 1,28E-01 | 3,64E-01 |
| <i>LOC220433</i>       | -1,05 | 1,29E-01 | 3,64E-01 |
| <i>A_24_P609932</i>    | 1,06  | 1,29E-01 | 3,64E-01 |
| <i>A_32_P69616</i>     | 1,08  | 1,29E-01 | 3,64E-01 |
| <i>A_32_P52268</i>     | -1,07 | 1,29E-01 | 3,64E-01 |
| <i>CNTD2</i>           | 1,07  | 1,29E-01 | 3,64E-01 |
| <i>A_32_P115043</i>    | 1,05  | 1,29E-01 | 3,64E-01 |
| <i>ATP2B4</i>          | -1,16 | 1,29E-01 | 3,64E-01 |
| <i>TSPAN12</i>         | 1,14  | 1,29E-01 | 3,64E-01 |
| <i>BF928446</i>        | -1,08 | 1,29E-01 | 3,64E-01 |
| <i>CACNG8</i>          | -1,05 | 1,29E-01 | 3,64E-01 |
| <i>PNRC1</i>           | 1,12  | 1,29E-01 | 3,64E-01 |
| <i>AW292854</i>        | -1,15 | 1,29E-01 | 3,65E-01 |
| <i>EGLN1</i>           | 1,10  | 1,29E-01 | 3,65E-01 |
| <i>CR626729</i>        | -1,10 | 1,29E-01 | 3,65E-01 |
| <i>THC2406482</i>      | -1,07 | 1,29E-01 | 3,65E-01 |
| <i>TAAR9</i>           | 1,08  | 1,29E-01 | 3,65E-01 |
| <i>TMEM16C</i>         | -1,17 | 1,29E-01 | 3,65E-01 |
| <i>C1orf37</i>         | 1,04  | 1,29E-01 | 3,65E-01 |
| <i>AK056973</i>        | -1,05 | 1,29E-01 | 3,65E-01 |
| <i>IQCK</i>            | -1,08 | 1,29E-01 | 3,65E-01 |

|                 |       |          |          |
|-----------------|-------|----------|----------|
| MYOG            | 1,05  | 1,29E-01 | 3,65E-01 |
| LOC402643       | 1,14  | 1,29E-01 | 3,65E-01 |
| FLJ22536        | -1,10 | 1,29E-01 | 3,65E-01 |
| A_32_P213358    | -1,08 | 1,29E-01 | 3,65E-01 |
| BX100298        | -1,06 | 1,29E-01 | 3,65E-01 |
| A_24_P824642    | -1,06 | 1,29E-01 | 3,65E-01 |
| DB318477        | 1,06  | 1,29E-01 | 3,65E-01 |
| EFNB2           | 1,10  | 1,29E-01 | 3,65E-01 |
| MICA            | -1,08 | 1,30E-01 | 3,65E-01 |
| ENST00000368577 | -1,07 | 1,30E-01 | 3,65E-01 |
| C10orf9         | 1,05  | 1,30E-01 | 3,65E-01 |
| CFHR2           | 1,06  | 1,29E-01 | 3,65E-01 |
| MDM4            | 1,07  | 1,30E-01 | 3,65E-01 |
| NPAS3           | 1,09  | 1,29E-01 | 3,65E-01 |
| ENST00000380622 | 1,10  | 1,30E-01 | 3,65E-01 |
| PTD008          | -1,05 | 1,30E-01 | 3,66E-01 |
| STARD13         | 1,11  | 1,30E-01 | 3,66E-01 |
| RNF151          | -1,05 | 1,30E-01 | 3,66E-01 |
| AA282192        | 1,06  | 1,30E-01 | 3,66E-01 |
| STX1B2          | 1,07  | 1,30E-01 | 3,66E-01 |
| A_32_P159528    | 1,07  | 1,30E-01 | 3,66E-01 |
| TG              | -1,08 | 1,30E-01 | 3,66E-01 |
| CR598345        | -1,07 | 1,30E-01 | 3,66E-01 |
| GLE1L           | -1,06 | 1,30E-01 | 3,66E-01 |
| C2orf34         | -1,05 | 1,30E-01 | 3,66E-01 |
| LRR35           | 1,06  | 1,30E-01 | 3,66E-01 |
| AW673984        | 1,06  | 1,30E-01 | 3,66E-01 |
| ENST00000311695 | 1,11  | 1,30E-01 | 3,66E-01 |
| PLEK2           | 1,12  | 1,30E-01 | 3,66E-01 |
| THC2410866      | 1,18  | 1,30E-01 | 3,66E-01 |
| VPREB3          | 1,06  | 1,30E-01 | 3,66E-01 |
| ENST00000261275 | 1,11  | 1,30E-01 | 3,66E-01 |
| A_23_P399604    | -1,06 | 1,30E-01 | 3,66E-01 |
| AK092094        | -1,05 | 1,30E-01 | 3,66E-01 |
| PAPPA2          | -1,14 | 1,30E-01 | 3,66E-01 |
| AF285120        | -1,07 | 1,30E-01 | 3,66E-01 |
| RRN3            | -1,06 | 1,30E-01 | 3,66E-01 |
| MGC42638        | 1,08  | 1,30E-01 | 3,66E-01 |
| C6orf159        | -1,07 | 1,30E-01 | 3,66E-01 |
| BX097486        | -1,06 | 1,30E-01 | 3,66E-01 |
| IL31RA          | 1,07  | 1,30E-01 | 3,66E-01 |
| ZBED1           | 1,08  | 1,30E-01 | 3,66E-01 |
| AW977527        | 1,21  | 1,30E-01 | 3,66E-01 |
| ZKSCAN1         | -1,08 | 1,30E-01 | 3,66E-01 |

|                        |       |          |          |
|------------------------|-------|----------|----------|
| <i>HCP5</i>            | -1,08 | 1,30E-01 | 3,66E-01 |
| <i>NP109393</i>        | 1,05  | 1,30E-01 | 3,66E-01 |
| <i>RANBP3</i>          | -1,05 | 1,30E-01 | 3,66E-01 |
| <i>AI989650</i>        | 1,06  | 1,30E-01 | 3,66E-01 |
| <i>T82292</i>          | 1,09  | 1,30E-01 | 3,66E-01 |
| <i>A_24_P75888</i>     | -1,09 | 1,30E-01 | 3,67E-01 |
| <i>ELAC1</i>           | -1,07 | 1,30E-01 | 3,67E-01 |
| <i>D31825</i>          | 1,07  | 1,30E-01 | 3,67E-01 |
| <i>A_24_P489639</i>    | 1,08  | 1,30E-01 | 3,67E-01 |
| <i>ZDHHC1</i>          | 1,06  | 1,30E-01 | 3,67E-01 |
| <i>ALDH18A1</i>        | -1,15 | 1,30E-01 | 3,67E-01 |
| <i>VARSL</i>           | -1,09 | 1,30E-01 | 3,67E-01 |
| <i>AK026965</i>        | -1,08 | 1,30E-01 | 3,67E-01 |
| <i>EDAR</i>            | 1,07  | 1,30E-01 | 3,67E-01 |
| <i>KCNN4</i>           | 1,11  | 1,31E-01 | 3,67E-01 |
| <i>FLJ37357</i>        | 1,09  | 1,31E-01 | 3,67E-01 |
| <i>ANGPTL5</i>         | -1,14 | 1,31E-01 | 3,67E-01 |
| <i>CHEK2</i>           | -1,08 | 1,31E-01 | 3,67E-01 |
| <i>A_32_P49392</i>     | -1,07 | 1,31E-01 | 3,67E-01 |
| <i>ATP13A1</i>         | -1,05 | 1,31E-01 | 3,67E-01 |
| <i>HSPA14</i>          | 1,05  | 1,31E-01 | 3,67E-01 |
| <i>ATP5B</i>           | 1,08  | 1,31E-01 | 3,67E-01 |
| <i>AI133203</i>        | 1,08  | 1,31E-01 | 3,67E-01 |
| <i>BC039399</i>        | 1,08  | 1,31E-01 | 3,67E-01 |
| <i>PITRM1</i>          | 1,06  | 1,31E-01 | 3,67E-01 |
| <i>DKFZP434P211</i>    | -1,05 | 1,31E-01 | 3,67E-01 |
| <i>AL581249</i>        | 1,05  | 1,31E-01 | 3,67E-01 |
| <i>FBN2</i>            | -1,12 | 1,31E-01 | 3,67E-01 |
| <i>AF086102</i>        | -1,04 | 1,31E-01 | 3,67E-01 |
| <i>AI630979</i>        | 1,05  | 1,31E-01 | 3,67E-01 |
| <i>PGBD4</i>           | -1,06 | 1,31E-01 | 3,67E-01 |
| <i>THC2358306</i>      | -1,06 | 1,31E-01 | 3,67E-01 |
| <i>MCF2</i>            | 1,06  | 1,31E-01 | 3,68E-01 |
| <i>BU681302</i>        | -1,06 | 1,31E-01 | 3,68E-01 |
| <i>A_24_P925334</i>    | -1,08 | 1,31E-01 | 3,68E-01 |
| <i>SLC35A1</i>         | -1,06 | 1,31E-01 | 3,68E-01 |
| <i>CA429005</i>        | -1,06 | 1,31E-01 | 3,68E-01 |
| <i>THC2361406</i>      | -1,08 | 1,31E-01 | 3,68E-01 |
| <i>KIF5C</i>           | 1,18  | 1,31E-01 | 3,68E-01 |
| <i>A_24_P482124</i>    | 1,06  | 1,31E-01 | 3,68E-01 |
| <i>MAGED1</i>          | -1,20 | 1,31E-01 | 3,68E-01 |
| <i>COL4A3BP</i>        | 1,07  | 1,31E-01 | 3,68E-01 |
| <i>ENST00000335282</i> | -1,13 | 1,31E-01 | 3,68E-01 |
| <i>HPSE2</i>           | -1,11 | 1,31E-01 | 3,68E-01 |

|                        |       |          |          |
|------------------------|-------|----------|----------|
| <i>PDCD6</i>           | -1,06 | 1,31E-01 | 3,68E-01 |
| <i>HORMAD2</i>         | -1,05 | 1,31E-01 | 3,68E-01 |
| <i>AA431401</i>        | 1,05  | 1,31E-01 | 3,68E-01 |
| <i>AI379175</i>        | 1,12  | 1,31E-01 | 3,68E-01 |
| <i>THC2442277</i>      | 1,12  | 1,31E-01 | 3,68E-01 |
| <i>ZNF318</i>          | -1,05 | 1,31E-01 | 3,68E-01 |
| <i>FLJ38773</i>        | -1,05 | 1,32E-01 | 3,68E-01 |
| <i>C1QB</i>            | -1,16 | 1,32E-01 | 3,68E-01 |
| <i>A_32_P133526</i>    | -1,08 | 1,32E-01 | 3,68E-01 |
| <i>ZNF600</i>          | -1,06 | 1,32E-01 | 3,69E-01 |
| <i>TXN2</i>            | -1,05 | 1,32E-01 | 3,69E-01 |
| <i>GYPA</i>            | 1,05  | 1,32E-01 | 3,69E-01 |
| <i>PFN3</i>            | -1,05 | 1,32E-01 | 3,69E-01 |
| <i>TKT</i>             | -1,04 | 1,32E-01 | 3,69E-01 |
| <i>NRIP1</i>           | -1,16 | 1,32E-01 | 3,69E-01 |
| <i>ANKRD13D</i>        | -1,06 | 1,32E-01 | 3,69E-01 |
| <i>NFATC4</i>          | 1,07  | 1,32E-01 | 3,69E-01 |
| <i>SELENBP1</i>        | -1,11 | 1,32E-01 | 3,69E-01 |
| <i>IL1R2</i>           | 1,29  | 1,32E-01 | 3,69E-01 |
| <i>LONRF1</i>          | 1,08  | 1,32E-01 | 3,69E-01 |
| <i>CCL11</i>           | -1,18 | 1,32E-01 | 3,70E-01 |
| <i>FKBP6</i>           | 1,07  | 1,32E-01 | 3,70E-01 |
| <i>XPO7</i>            | 1,07  | 1,32E-01 | 3,70E-01 |
| <i>BX089650</i>        | 1,09  | 1,32E-01 | 3,70E-01 |
| <i>PELI2</i>           | 1,11  | 1,32E-01 | 3,70E-01 |
| <i>ENST00000324745</i> | 1,09  | 1,32E-01 | 3,70E-01 |
| <i>A_32_P151782</i>    | -1,09 | 1,32E-01 | 3,70E-01 |
| <i>MRRF</i>            | -1,08 | 1,32E-01 | 3,70E-01 |
| <i>CTDP1</i>           | 1,04  | 1,32E-01 | 3,70E-01 |
| <i>SLC10A4</i>         | -1,37 | 1,32E-01 | 3,70E-01 |
| <i>C12orf23</i>        | -1,11 | 1,32E-01 | 3,70E-01 |
| <i>BC012753</i>        | -1,11 | 1,32E-01 | 3,70E-01 |
| <i>PXMP3</i>           | -1,07 | 1,32E-01 | 3,70E-01 |
| <i>UNC93A</i>          | 1,04  | 1,32E-01 | 3,70E-01 |
| <i>A_24_P204095</i>    | -1,04 | 1,32E-01 | 3,70E-01 |
| <i>ENST00000300061</i> | 1,06  | 1,32E-01 | 3,70E-01 |
| <i>CHST8</i>           | 1,09  | 1,32E-01 | 3,70E-01 |
| <i>RHOH</i>            | 1,16  | 1,32E-01 | 3,70E-01 |
| <i>ATIC</i>            | -1,07 | 1,33E-01 | 3,70E-01 |
| <i>BC016022</i>        | -1,22 | 1,33E-01 | 3,70E-01 |
| <i>CDCA1</i>           | -1,07 | 1,33E-01 | 3,70E-01 |
| <i>AF232216</i>        | -1,06 | 1,33E-01 | 3,70E-01 |
| <i>FBL</i>             | -1,05 | 1,33E-01 | 3,70E-01 |
| <i>BMP8A</i>           | 1,07  | 1,33E-01 | 3,70E-01 |

|                        |       |          |          |
|------------------------|-------|----------|----------|
| <i>SH3BGRL3</i>        | 1,10  | 1,33E-01 | 3,70E-01 |
| <i>A_32_P85360</i>     | 1,33  | 1,33E-01 | 3,70E-01 |
| <i>MMP12</i>           | 1,06  | 1,33E-01 | 3,70E-01 |
| <i>AJ399872</i>        | -1,25 | 1,33E-01 | 3,70E-01 |
| <i>TRMT12</i>          | 1,06  | 1,33E-01 | 3,70E-01 |
| <i>AF130101</i>        | -1,09 | 1,33E-01 | 3,70E-01 |
| <i>A_32_P92274</i>     | -1,05 | 1,33E-01 | 3,70E-01 |
| <i>C9orf79</i>         | 1,04  | 1,33E-01 | 3,70E-01 |
| <i>CR611332</i>        | -1,06 | 1,33E-01 | 3,71E-01 |
| <i>LOC222967</i>       | -1,05 | 1,33E-01 | 3,71E-01 |
| <i>AGPS</i>            | 1,11  | 1,33E-01 | 3,71E-01 |
| <i>GNAT1</i>           | 1,04  | 1,33E-01 | 3,71E-01 |
| <i>TDGF3</i>           | -1,08 | 1,33E-01 | 3,71E-01 |
| <i>A_32_P47778</i>     | 1,06  | 1,33E-01 | 3,71E-01 |
| <i>ENST00000331849</i> | 1,12  | 1,33E-01 | 3,71E-01 |
| <i>ANTXR2</i>          | -1,15 | 1,33E-01 | 3,71E-01 |
| <i>MACF1</i>           | 1,06  | 1,33E-01 | 3,71E-01 |
| <i>AW772196</i>        | -1,06 | 1,33E-01 | 3,71E-01 |
| <i>BG542103</i>        | -1,13 | 1,33E-01 | 3,71E-01 |
| <i>APOF</i>            | -1,05 | 1,33E-01 | 3,71E-01 |
| <i>CPNE7</i>           | 1,06  | 1,33E-01 | 3,71E-01 |
| <i>EIF1</i>            | 1,07  | 1,33E-01 | 3,71E-01 |
| <i>ENST00000380896</i> | 1,07  | 1,33E-01 | 3,71E-01 |
| <i>A_24_P925966</i>    | 1,07  | 1,33E-01 | 3,71E-01 |
| <i>C8orf42</i>         | 1,08  | 1,33E-01 | 3,71E-01 |
| <i>RFXDC2</i>          | 1,10  | 1,33E-01 | 3,71E-01 |
| <i>ITGB5</i>           | 1,13  | 1,33E-01 | 3,71E-01 |
| <i>P2RX2</i>           | 1,19  | 1,33E-01 | 3,71E-01 |
| <i>BX537551</i>        | 1,11  | 1,33E-01 | 3,71E-01 |
| <i>JUP</i>             | -1,20 | 1,33E-01 | 3,71E-01 |
| <i>ZCD1</i>            | 1,08  | 1,33E-01 | 3,71E-01 |
| <i>AK000053</i>        | 1,15  | 1,33E-01 | 3,71E-01 |
| <i>KRT20</i>           | 1,04  | 1,34E-01 | 3,72E-01 |
| <i>AK093982</i>        | -1,07 | 1,34E-01 | 3,72E-01 |
| <i>FBXW7</i>           | -1,05 | 1,34E-01 | 3,72E-01 |
| <i>THC2277801</i>      | -1,29 | 1,34E-01 | 3,72E-01 |
| <i>MOAP1</i>           | 1,10  | 1,34E-01 | 3,72E-01 |
| <i>SH3BGRL2</i>        | 1,10  | 1,34E-01 | 3,72E-01 |
| <i>NANOS1</i>          | -1,26 | 1,34E-01 | 3,72E-01 |
| <i>THC2376915</i>      | -1,09 | 1,34E-01 | 3,72E-01 |
| <i>PDE7A</i>           | -1,08 | 1,34E-01 | 3,72E-01 |
| <i>THC2300959</i>      | -1,06 | 1,34E-01 | 3,72E-01 |
| <i>ZNF233</i>          | -1,06 | 1,34E-01 | 3,72E-01 |
| <i>CR936711</i>        | 1,06  | 1,34E-01 | 3,72E-01 |

|                     |       |          |          |
|---------------------|-------|----------|----------|
| <i>A_24_P925779</i> | 1,06  | 1,34E-01 | 3,72E-01 |
| <i>LOC285740</i>    | 1,06  | 1,34E-01 | 3,72E-01 |
| <i>THC2272140</i>   | 1,06  | 1,34E-01 | 3,72E-01 |
| <i>TM7SF4</i>       | 1,07  | 1,34E-01 | 3,72E-01 |
| <i>PKN1</i>         | 1,08  | 1,34E-01 | 3,72E-01 |
| <i>PTRH1</i>        | 1,08  | 1,34E-01 | 3,72E-01 |
| <i>NAG18</i>        | -1,05 | 1,34E-01 | 3,72E-01 |
| <i>AW298233</i>     | -1,08 | 1,34E-01 | 3,72E-01 |
| <i>PCDHB12</i>      | -1,07 | 1,34E-01 | 3,72E-01 |
| <i>THC2395739</i>   | -1,07 | 1,34E-01 | 3,72E-01 |
| <i>C13orf21</i>     | -1,55 | 1,34E-01 | 3,72E-01 |
| <i>CHCHD5</i>       | 1,05  | 1,34E-01 | 3,72E-01 |
| <i>AF075108</i>     | 1,06  | 1,34E-01 | 3,72E-01 |
| <i>AF131834</i>     | 1,10  | 1,34E-01 | 3,72E-01 |
| <i>HDHD1A</i>       | -1,05 | 1,34E-01 | 3,72E-01 |
| <i>CSPG4LYP1</i>    | 1,04  | 1,34E-01 | 3,72E-01 |
| <i>MMP15</i>        | 1,09  | 1,34E-01 | 3,72E-01 |
| <i>ADPRHL1</i>      | -1,06 | 1,34E-01 | 3,72E-01 |
| <i>HLA-DRA</i>      | -1,09 | 1,34E-01 | 3,72E-01 |
| <i>AK123446</i>     | -1,09 | 1,34E-01 | 3,72E-01 |
| <i>RPS11</i>        | -1,07 | 1,34E-01 | 3,72E-01 |
| <i>FLJ23356</i>     | 1,04  | 1,34E-01 | 3,72E-01 |
| <i>A_24_P170283</i> | 1,13  | 1,34E-01 | 3,72E-01 |
| <i>AI080703</i>     | 1,05  | 1,34E-01 | 3,73E-01 |
| <i>FLJ20152</i>     | 1,21  | 1,34E-01 | 3,73E-01 |
| <i>BQ026633</i>     | -1,05 | 1,34E-01 | 3,73E-01 |
| <i>AF237700</i>     | 1,08  | 1,34E-01 | 3,73E-01 |
| <i>SLC35F5</i>      | 1,05  | 1,34E-01 | 3,73E-01 |
| <i>MTMR10</i>       | -1,05 | 1,34E-01 | 3,73E-01 |
| <i>ZNF277</i>       | 1,07  | 1,34E-01 | 3,73E-01 |
| <i>A_24_P49800</i>  | 1,08  | 1,34E-01 | 3,73E-01 |
| <i>RGAG1</i>        | -1,06 | 1,34E-01 | 3,73E-01 |
| <i>PAN3</i>         | -1,07 | 1,35E-01 | 3,73E-01 |
| <i>NRL</i>          | -1,05 | 1,35E-01 | 3,73E-01 |
| <i>SLC24A3</i>      | -1,28 | 1,35E-01 | 3,73E-01 |
| <i>AK024382</i>     | -1,16 | 1,35E-01 | 3,73E-01 |
| <i>AK054718</i>     | -1,08 | 1,35E-01 | 3,73E-01 |
| <i>EIF2S3</i>       | 1,08  | 1,35E-01 | 3,73E-01 |
| <i>A_24_P67100</i>  | -1,05 | 1,35E-01 | 3,73E-01 |
| <i>TMPRSS11E</i>    | -1,18 | 1,35E-01 | 3,73E-01 |
| <i>A_32_P18300</i>  | -1,08 | 1,35E-01 | 3,73E-01 |
| <i>DTYMK</i>        | -1,05 | 1,35E-01 | 3,73E-01 |
| <i>BM505503</i>     | -1,04 | 1,35E-01 | 3,73E-01 |
| <i>A_24_P900730</i> | 1,06  | 1,35E-01 | 3,73E-01 |



|                        |       |          |          |
|------------------------|-------|----------|----------|
| <i>DRG1</i>            | -1,04 | 1,35E-01 | 3,73E-01 |
| <i>PIR</i>             | 1,07  | 1,35E-01 | 3,73E-01 |
| <i>BU507302</i>        | -1,10 | 1,35E-01 | 3,73E-01 |
| <i>A_32_P35294</i>     | -1,07 | 1,35E-01 | 3,73E-01 |
| <i>CR603201</i>        | 1,04  | 1,35E-01 | 3,73E-01 |
| <i>DUSP7</i>           | 1,08  | 1,35E-01 | 3,73E-01 |
| <i>ELMOD1</i>          | 1,13  | 1,35E-01 | 3,73E-01 |
| <i>A_32_P114615</i>    | -1,08 | 1,35E-01 | 3,73E-01 |
| <i>MYCL1</i>           | 1,04  | 1,35E-01 | 3,74E-01 |
| <i>CR618217</i>        | -1,06 | 1,35E-01 | 3,74E-01 |
| <i>LOC285944</i>       | 1,10  | 1,35E-01 | 3,74E-01 |
| <i>HIST1H4H</i>        | 1,11  | 1,35E-01 | 3,74E-01 |
| <i>ENST00000313620</i> | -1,09 | 1,35E-01 | 3,74E-01 |
| <i>BATF2</i>           | -1,08 | 1,35E-01 | 3,74E-01 |
| <i>SHKBP1</i>          | 1,06  | 1,35E-01 | 3,74E-01 |
| <i>PRDM16</i>          | 1,21  | 1,35E-01 | 3,74E-01 |
| <i>RFC2</i>            | 1,05  | 1,35E-01 | 3,74E-01 |
| <i>RAB3GAP2</i>        | -1,05 | 1,35E-01 | 3,74E-01 |
| <i>REST</i>            | 1,06  | 1,35E-01 | 3,74E-01 |
| <i>TIGD3</i>           | 1,05  | 1,35E-01 | 3,74E-01 |
| <i>C9orf39</i>         | 1,09  | 1,35E-01 | 3,74E-01 |
| <i>RGS18</i>           | -1,15 | 1,35E-01 | 3,74E-01 |
| <i>GOLT1B</i>          | -1,09 | 1,35E-01 | 3,74E-01 |
| <i>BG216262</i>        | -1,08 | 1,35E-01 | 3,74E-01 |
| <i>EDC3</i>            | -1,04 | 1,35E-01 | 3,74E-01 |
| <i>AK000038</i>        | 1,11  | 1,35E-01 | 3,74E-01 |
| <i>AK024371</i>        | -1,05 | 1,35E-01 | 3,74E-01 |
| <i>TAF1C</i>           | -1,07 | 1,35E-01 | 3,74E-01 |
| <i>PILRA</i>           | -1,09 | 1,35E-01 | 3,74E-01 |
| <i>ASTL</i>            | 1,08  | 1,35E-01 | 3,74E-01 |
| <i>AW968717</i>        | 1,06  | 1,35E-01 | 3,74E-01 |
| <i>TCF19</i>           | -1,06 | 1,35E-01 | 3,74E-01 |
| <i>A_24_P919805</i>    | 1,07  | 1,36E-01 | 3,74E-01 |
| <i>LAMA2</i>           | -1,11 | 1,36E-01 | 3,74E-01 |
| <i>RDH13</i>           | -1,08 | 1,36E-01 | 3,74E-01 |
| <i>CAD</i>             | -1,07 | 1,36E-01 | 3,74E-01 |
| <i>ELF2</i>            | -1,06 | 1,36E-01 | 3,74E-01 |
| <i>SIX5</i>            | -1,06 | 1,36E-01 | 3,74E-01 |
| <i>POT1</i>            | -1,05 | 1,36E-01 | 3,74E-01 |
| <i>BC037535</i>        | 1,06  | 1,36E-01 | 3,74E-01 |
| <i>THC2379120</i>      | 1,06  | 1,36E-01 | 3,74E-01 |
| <i>FLJ42875</i>        | 1,16  | 1,36E-01 | 3,74E-01 |
| <i>CR610211</i>        | 1,06  | 1,36E-01 | 3,75E-01 |
| <i>ABAT</i>            | -1,09 | 1,36E-01 | 3,75E-01 |

|                        |       |          |          |
|------------------------|-------|----------|----------|
| <i>DHRS1</i>           | -1,09 | 1,36E-01 | 3,75E-01 |
| <i>A_32_P64928</i>     | 1,16  | 1,36E-01 | 3,75E-01 |
| <i>AA179403</i>        | 1,05  | 1,36E-01 | 3,75E-01 |
| <i>BM680823</i>        | -1,08 | 1,36E-01 | 3,75E-01 |
| <i>THC2413666</i>      | -1,10 | 1,36E-01 | 3,75E-01 |
| <i>A_32_P233211</i>    | 1,06  | 1,36E-01 | 3,75E-01 |
| <i>BC039457</i>        | -1,09 | 1,36E-01 | 3,75E-01 |
| <i>CR618720</i>        | -1,05 | 1,36E-01 | 3,75E-01 |
| <i>TRAF3IP1</i>        | 1,07  | 1,36E-01 | 3,75E-01 |
| <i>LOC133874</i>       | 1,13  | 1,36E-01 | 3,75E-01 |
| <i>RAB37</i>           | -1,15 | 1,36E-01 | 3,75E-01 |
| <i>SSR3</i>            | -1,11 | 1,36E-01 | 3,75E-01 |
| <i>AI214728</i>        | -1,07 | 1,36E-01 | 3,75E-01 |
| <i>LUZP5</i>           | -1,06 | 1,36E-01 | 3,75E-01 |
| <i>NMD3</i>            | 1,04  | 1,36E-01 | 3,75E-01 |
| <i>BM969194</i>        | 1,05  | 1,36E-01 | 3,75E-01 |
| <i>KIAA0664</i>        | 1,06  | 1,36E-01 | 3,75E-01 |
| <i>SMARCE1</i>         | -1,07 | 1,36E-01 | 3,75E-01 |
| <i>ENST00000383620</i> | -1,06 | 1,36E-01 | 3,75E-01 |
| <i>PFDN1</i>           | 1,04  | 1,36E-01 | 3,75E-01 |
| <i>DMD</i>             | 1,18  | 1,36E-01 | 3,75E-01 |
| <i>TP53I11</i>         | 1,14  | 1,36E-01 | 3,75E-01 |
| <i>DKFZP434A062</i>    | 1,06  | 1,36E-01 | 3,75E-01 |
| <i>A_24_P932141</i>    | 1,06  | 1,37E-01 | 3,76E-01 |
| <i>ALG12</i>           | 1,05  | 1,37E-01 | 3,76E-01 |
| <i>RGNEF</i>           | 1,08  | 1,37E-01 | 3,76E-01 |
| <i>GLTSCR2</i>         | -1,07 | 1,37E-01 | 3,76E-01 |
| <i>RAB3B</i>           | 1,05  | 1,37E-01 | 3,76E-01 |
| <i>A_24_P929051</i>    | 1,06  | 1,37E-01 | 3,76E-01 |
| <i>FSCN3</i>           | 1,06  | 1,37E-01 | 3,76E-01 |
| <i>C1orf82</i>         | -1,04 | 1,37E-01 | 3,76E-01 |
| <i>AA827885</i>        | 1,06  | 1,37E-01 | 3,76E-01 |
| <i>TGFBRAP1</i>        | 1,06  | 1,37E-01 | 3,76E-01 |
| <i>LRRFIP2</i>         | 1,11  | 1,37E-01 | 3,76E-01 |
| <i>CD050559</i>        | -1,05 | 1,37E-01 | 3,76E-01 |
| <i>ENST00000354937</i> | 1,06  | 1,37E-01 | 3,76E-01 |
| <i>DOCK7</i>           | -1,05 | 1,37E-01 | 3,76E-01 |
| <i>MOBP</i>            | -1,04 | 1,37E-01 | 3,76E-01 |
| <i>SUOX</i>            | -1,08 | 1,37E-01 | 3,76E-01 |
| <i>C9orf62</i>         | 1,07  | 1,37E-01 | 3,76E-01 |
| <i>RBMS3</i>           | -1,08 | 1,37E-01 | 3,77E-01 |
| <i>C14orf145</i>       | -1,06 | 1,37E-01 | 3,77E-01 |
| <i>ARRDC1</i>          | 1,06  | 1,37E-01 | 3,77E-01 |
| <i>NFKBIE</i>          | 1,13  | 1,37E-01 | 3,77E-01 |

|                 |       |          |          |
|-----------------|-------|----------|----------|
| NCALD           | 1,18  | 1,37E-01 | 3,77E-01 |
| MAGEE1          | -1,06 | 1,37E-01 | 3,77E-01 |
| C19orf4         | 1,11  | 1,37E-01 | 3,77E-01 |
| RHOBTB2         | 1,04  | 1,37E-01 | 3,77E-01 |
| ENST00000369297 | -1,06 | 1,37E-01 | 3,77E-01 |
| AI693179        | 1,05  | 1,37E-01 | 3,77E-01 |
| SLC26A1         | 1,07  | 1,37E-01 | 3,77E-01 |
| GSN             | -1,16 | 1,37E-01 | 3,77E-01 |
| DOCK8           | -1,11 | 1,37E-01 | 3,77E-01 |
| ENST00000339907 | -1,10 | 1,37E-01 | 3,77E-01 |
| DUS4L           | -1,05 | 1,37E-01 | 3,77E-01 |
| A_24_P902195    | -1,14 | 1,38E-01 | 3,78E-01 |
| TNT             | 1,06  | 1,38E-01 | 3,78E-01 |
| THC2405171      | 1,21  | 1,38E-01 | 3,78E-01 |
| AL133627        | -1,12 | 1,38E-01 | 3,78E-01 |
| ATRX            | 1,06  | 1,38E-01 | 3,78E-01 |
| EML1            | -1,09 | 1,38E-01 | 3,78E-01 |
| A_24_P717609    | 1,07  | 1,38E-01 | 3,78E-01 |
| A_24_P922084    | 1,05  | 1,38E-01 | 3,78E-01 |
| KIF4A           | 1,06  | 1,38E-01 | 3,78E-01 |
| ENST00000336505 | 1,07  | 1,38E-01 | 3,78E-01 |
| LARS            | 1,07  | 1,38E-01 | 3,78E-01 |
| THC2437276      | 1,05  | 1,38E-01 | 3,78E-01 |
| ABCD2           | -1,14 | 1,38E-01 | 3,78E-01 |
| AK124841        | -1,09 | 1,38E-01 | 3,78E-01 |
| RARRES3         | -1,08 | 1,38E-01 | 3,78E-01 |
| KIAA2026        | -1,05 | 1,38E-01 | 3,78E-01 |
| PNPO            | 1,04  | 1,38E-01 | 3,78E-01 |
| PBOV1           | 1,05  | 1,38E-01 | 3,78E-01 |
| HSPC157         | -1,09 | 1,38E-01 | 3,78E-01 |
| ZNF414          | -1,05 | 1,38E-01 | 3,78E-01 |
| AW579245        | 1,06  | 1,38E-01 | 3,78E-01 |
| C19orf24        | 1,06  | 1,38E-01 | 3,78E-01 |
| NFE2L1          | 1,07  | 1,38E-01 | 3,78E-01 |
| MED6            | 1,05  | 1,38E-01 | 3,78E-01 |
| LOC153914       | -1,09 | 1,38E-01 | 3,78E-01 |
| ENST00000324808 | -1,05 | 1,38E-01 | 3,78E-01 |
| ATXN7L2         | 1,06  | 1,38E-01 | 3,78E-01 |
| KLK14           | 1,04  | 1,38E-01 | 3,78E-01 |
| DERL1           | 1,07  | 1,38E-01 | 3,78E-01 |
| ENST00000323800 | 1,07  | 1,38E-01 | 3,78E-01 |
| RGS4            | 1,15  | 1,38E-01 | 3,79E-01 |
| PKD2            | -1,10 | 1,38E-01 | 3,79E-01 |
| MLCK            | -1,05 | 1,38E-01 | 3,79E-01 |

|                        |       |          |          |
|------------------------|-------|----------|----------|
| <i>BG708379</i>        | 1,05  | 1,38E-01 | 3,79E-01 |
| <i>A_24_P686263</i>    | 1,08  | 1,38E-01 | 3,79E-01 |
| <i>CDC7</i>            | 1,13  | 1,38E-01 | 3,79E-01 |
| <i>BC029038</i>        | -1,14 | 1,38E-01 | 3,79E-01 |
| <i>THC2414638</i>      | -1,07 | 1,38E-01 | 3,79E-01 |
| <i>CLCN1</i>           | 1,05  | 1,38E-01 | 3,79E-01 |
| <i>THC2329478</i>      | 1,09  | 1,38E-01 | 3,79E-01 |
| <i>T40959</i>          | 1,06  | 1,38E-01 | 3,79E-01 |
| <i>GPR153</i>          | 1,08  | 1,39E-01 | 3,79E-01 |
| <i>A_24_P196175</i>    | 1,06  | 1,39E-01 | 3,79E-01 |
| <i>A_24_P101561</i>    | 1,09  | 1,39E-01 | 3,79E-01 |
| <i>C11orf37</i>        | 1,07  | 1,39E-01 | 3,79E-01 |
| <i>A_23_P10605</i>     | 1,13  | 1,39E-01 | 3,79E-01 |
| <i>AI241561</i>        | -1,07 | 1,39E-01 | 3,79E-01 |
| <i>ENST00000337102</i> | -1,05 | 1,39E-01 | 3,79E-01 |
| <i>SS18</i>            | 1,03  | 1,39E-01 | 3,79E-01 |
| <i>A_32_P80295</i>     | 1,08  | 1,39E-01 | 3,79E-01 |
| <i>AFARP1</i>          | -1,09 | 1,39E-01 | 3,79E-01 |
| <i>C6orf57</i>         | -1,06 | 1,39E-01 | 3,79E-01 |
| <i>TGIF2</i>           | -1,05 | 1,39E-01 | 3,79E-01 |
| <i>HESX1</i>           | -1,05 | 1,39E-01 | 3,79E-01 |
| <i>TIMM17B</i>         | 1,05  | 1,39E-01 | 3,79E-01 |
| <i>DSPP</i>            | 1,06  | 1,39E-01 | 3,79E-01 |
| <i>C19orf31</i>        | 1,09  | 1,39E-01 | 3,79E-01 |
| <i>AI192327</i>        | 1,11  | 1,39E-01 | 3,79E-01 |
| <i>AK126976</i>        | -1,24 | 1,39E-01 | 3,79E-01 |
| <i>YES1</i>            | -1,05 | 1,39E-01 | 3,79E-01 |
| <i>THC2436642</i>      | 1,07  | 1,39E-01 | 3,79E-01 |
| <i>A_32_P12282</i>     | -1,12 | 1,39E-01 | 3,79E-01 |
| <i>CABYR</i>           | -1,12 | 1,39E-01 | 3,79E-01 |
| <i>RUVBL2</i>          | 1,05  | 1,39E-01 | 3,79E-01 |
| <i>PCYOX1</i>          | -1,08 | 1,39E-01 | 3,79E-01 |
| <i>AK023773</i>        | -1,05 | 1,39E-01 | 3,79E-01 |
| <i>RTN3</i>            | 1,06  | 1,39E-01 | 3,79E-01 |
| <i>AI698357</i>        | 1,06  | 1,39E-01 | 3,79E-01 |
| <i>FBXO30</i>          | 1,11  | 1,39E-01 | 3,79E-01 |
| <i>THC2405886</i>      | 1,14  | 1,39E-01 | 3,80E-01 |
| <i>DIP13B</i>          | -1,08 | 1,39E-01 | 3,80E-01 |
| <i>RAPGEF2</i>         | 1,06  | 1,39E-01 | 3,80E-01 |
| <i>CHORDC1</i>         | -1,06 | 1,39E-01 | 3,80E-01 |
| <i>IFT81</i>           | -1,05 | 1,39E-01 | 3,80E-01 |
| <i>ENST00000337335</i> | -1,04 | 1,39E-01 | 3,80E-01 |
| <i>MTHFD1L</i>         | 1,08  | 1,39E-01 | 3,80E-01 |
| <i>FHOD3</i>           | 1,35  | 1,39E-01 | 3,80E-01 |

|                        |       |          |          |
|------------------------|-------|----------|----------|
| <i>A_32_P235293</i>    | -1,09 | 1,39E-01 | 3,80E-01 |
| <i>THC2458577</i>      | -1,07 | 1,39E-01 | 3,80E-01 |
| <i>AW183346</i>        | -1,06 | 1,39E-01 | 3,80E-01 |
| <i>AF130062</i>        | -1,04 | 1,39E-01 | 3,80E-01 |
| <i>C9orf90</i>         | -1,07 | 1,39E-01 | 3,80E-01 |
| <i>DUX4</i>            | 1,06  | 1,39E-01 | 3,80E-01 |
| <i>LOC158830</i>       | -1,11 | 1,40E-01 | 3,80E-01 |
| <i>A_32_P135489</i>    | -1,06 | 1,40E-01 | 3,80E-01 |
| <i>LOC407835</i>       | 1,05  | 1,40E-01 | 3,80E-01 |
| <i>MGC24125</i>        | 1,06  | 1,40E-01 | 3,80E-01 |
| <i>TMEM61</i>          | 1,09  | 1,40E-01 | 3,80E-01 |
| <i>BC007606</i>        | -1,07 | 1,40E-01 | 3,80E-01 |
| <i>KIAA0746</i>        | -1,09 | 1,40E-01 | 3,80E-01 |
| <i>THC2381319</i>      | -1,10 | 1,40E-01 | 3,80E-01 |
| <i>OAZ3</i>            | 1,07  | 1,40E-01 | 3,80E-01 |
| <i>PRKACB</i>          | 1,10  | 1,40E-01 | 3,80E-01 |
| <i>PLEK</i>            | -1,14 | 1,40E-01 | 3,81E-01 |
| <i>AK023038</i>        | -1,07 | 1,40E-01 | 3,81E-01 |
| <i>T75585</i>          | -1,06 | 1,40E-01 | 3,81E-01 |
| <i>THC2410997</i>      | 1,05  | 1,40E-01 | 3,81E-01 |
| <i>GGA2</i>            | -1,05 | 1,40E-01 | 3,81E-01 |
| <i>RBBP6</i>           | 1,05  | 1,40E-01 | 3,81E-01 |
| <i>DA422275</i>        | 1,07  | 1,40E-01 | 3,81E-01 |
| <i>PVRL3</i>           | 1,06  | 1,40E-01 | 3,81E-01 |
| <i>BF899060</i>        | 1,08  | 1,40E-01 | 3,81E-01 |
| <i>NDUFA1</i>          | 1,06  | 1,40E-01 | 3,81E-01 |
| <i>C1QA</i>            | -1,17 | 1,40E-01 | 3,81E-01 |
| <i>CART1</i>           | -1,09 | 1,40E-01 | 3,81E-01 |
| <i>SIN3A</i>           | -1,05 | 1,40E-01 | 3,81E-01 |
| <i>HADHA</i>           | 1,06  | 1,40E-01 | 3,81E-01 |
| <i>AL079999</i>        | -1,14 | 1,40E-01 | 3,81E-01 |
| <i>BM475608</i>        | 1,06  | 1,40E-01 | 3,81E-01 |
| <i>FOXD2</i>           | -1,13 | 1,40E-01 | 3,81E-01 |
| <i>PHOX2B</i>          | -1,09 | 1,40E-01 | 3,81E-01 |
| <i>ENST00000381108</i> | -1,09 | 1,40E-01 | 3,81E-01 |
| <i>THC2411808</i>      | -1,08 | 1,40E-01 | 3,81E-01 |
| <i>ZNF253</i>          | -1,07 | 1,40E-01 | 3,81E-01 |
| <i>CR613361</i>        | -1,06 | 1,40E-01 | 3,81E-01 |
| <i>PCDHB15</i>         | 1,08  | 1,40E-01 | 3,81E-01 |
| <i>NCOR2</i>           | -1,11 | 1,40E-01 | 3,81E-01 |
| <i>BC015835</i>        | -1,08 | 1,40E-01 | 3,82E-01 |
| <i>A_24_P324074</i>    | 1,17  | 1,40E-01 | 3,82E-01 |
| <i>AK055212</i>        | -1,05 | 1,41E-01 | 3,82E-01 |
| <i>BC008759</i>        | 1,07  | 1,41E-01 | 3,82E-01 |

|                        |       |          |          |
|------------------------|-------|----------|----------|
| <i>LOC138046</i>       | 1,12  | 1,41E-01 | 3,82E-01 |
| <i>THC2378731</i>      | 1,05  | 1,41E-01 | 3,82E-01 |
| <i>PPARG</i>           | 1,10  | 1,41E-01 | 3,82E-01 |
| <i>A_24_P926606</i>    | -1,06 | 1,41E-01 | 3,82E-01 |
| <i>A_24_P118874</i>    | -1,05 | 1,41E-01 | 3,82E-01 |
| <i>SERPINA4</i>        | -1,07 | 1,41E-01 | 3,82E-01 |
| <i>Ells1</i>           | 1,13  | 1,41E-01 | 3,82E-01 |
| <i>THC2445259</i>      | 1,08  | 1,41E-01 | 3,82E-01 |
| <i>ESTRRA</i>          | 1,06  | 1,41E-01 | 3,82E-01 |
| <i>GTF2E2</i>          | 1,06  | 1,41E-01 | 3,82E-01 |
| <i>BQ003090</i>        | -1,04 | 1,41E-01 | 3,82E-01 |
| <i>RPS29</i>           | -1,04 | 1,41E-01 | 3,83E-01 |
| <i>ENST00000356506</i> | -1,05 | 1,41E-01 | 3,83E-01 |
| <i>THC2276504</i>      | 1,22  | 1,41E-01 | 3,83E-01 |
| <i>ENST00000320159</i> | -1,09 | 1,41E-01 | 3,83E-01 |
| <i>A_24_P924029</i>    | 1,05  | 1,41E-01 | 3,83E-01 |
| <i>LOC389831</i>       | -1,26 | 1,41E-01 | 3,83E-01 |
| <i>THC2341118</i>      | 1,04  | 1,41E-01 | 3,83E-01 |
| <i>AMICA1</i>          | -1,17 | 1,41E-01 | 3,83E-01 |
| <i>HOXC9</i>           | 1,15  | 1,41E-01 | 3,83E-01 |
| <i>KIAA1409</i>        | 1,05  | 1,41E-01 | 3,83E-01 |
| <i>A_23_P348587</i>    | 1,06  | 1,41E-01 | 3,83E-01 |
| <i>AK054929</i>        | 1,11  | 1,41E-01 | 3,83E-01 |
| <i>PPP2CB</i>          | 1,06  | 1,41E-01 | 3,83E-01 |
| <i>SYNGR4</i>          | 1,08  | 1,41E-01 | 3,83E-01 |
| <i>AK096580</i>        | -1,09 | 1,41E-01 | 3,83E-01 |
| <i>CB528527</i>        | 1,05  | 1,41E-01 | 3,83E-01 |
| <i>BC033940</i>        | -1,05 | 1,41E-01 | 3,83E-01 |
| <i>CCDC49</i>          | 1,05  | 1,41E-01 | 3,83E-01 |
| <i>MYH7</i>            | 1,06  | 1,41E-01 | 3,83E-01 |
| <i>GAMT</i>            | 1,07  | 1,42E-01 | 3,84E-01 |
| <i>ACVR1</i>           | -1,08 | 1,42E-01 | 3,84E-01 |
| <i>SPATA4</i>          | 1,07  | 1,42E-01 | 3,84E-01 |
| <i>NME5</i>            | -1,13 | 1,42E-01 | 3,84E-01 |
| <i>ZNF31</i>           | -1,10 | 1,42E-01 | 3,84E-01 |
| <i>A_32_P90468</i>     | -1,09 | 1,42E-01 | 3,84E-01 |
| <i>ELSPBP1</i>         | -1,07 | 1,42E-01 | 3,84E-01 |
| <i>POLR3B</i>          | -1,07 | 1,42E-01 | 3,84E-01 |
| <i>A_24_P272381</i>    | 1,07  | 1,42E-01 | 3,84E-01 |
| <i>ADAMTS15</i>        | 1,10  | 1,42E-01 | 3,84E-01 |
| <i>AF111851</i>        | -1,05 | 1,42E-01 | 3,84E-01 |
| <i>THC2439629</i>      | -1,06 | 1,42E-01 | 3,84E-01 |
| <i>BLVRA</i>           | 1,05  | 1,42E-01 | 3,84E-01 |
| <i>TSC2</i>            | 1,06  | 1,42E-01 | 3,84E-01 |

|                        |       |          |          |
|------------------------|-------|----------|----------|
| <i>A_32_P171232</i>    | -1,06 | 1,42E-01 | 3,84E-01 |
| <i>FLJ20628</i>        | -1,07 | 1,42E-01 | 3,84E-01 |
| <i>SDHD</i>            | -1,07 | 1,42E-01 | 3,84E-01 |
| <i>CR601694</i>        | -1,09 | 1,42E-01 | 3,84E-01 |
| <i>AA296664</i>        | 1,05  | 1,42E-01 | 3,84E-01 |
| <i>DYNLRB1</i>         | 1,06  | 1,42E-01 | 3,84E-01 |
| <i>MGC17403</i>        | -1,05 | 1,42E-01 | 3,85E-01 |
| <i>LOC643100</i>       | 1,06  | 1,42E-01 | 3,85E-01 |
| <i>IFNA6</i>           | 1,07  | 1,42E-01 | 3,85E-01 |
| <i>ENST00000269499</i> | 1,07  | 1,42E-01 | 3,85E-01 |
| <i>SORCS3</i>          | 1,11  | 1,42E-01 | 3,85E-01 |
| <i>TPO</i>             | 1,39  | 1,42E-01 | 3,85E-01 |
| <i>THC2304000</i>      | -1,06 | 1,42E-01 | 3,85E-01 |
| <i>KRT16</i>           | 1,49  | 1,42E-01 | 3,85E-01 |
| <i>A_24_P195724</i>    | -1,08 | 1,42E-01 | 3,85E-01 |
| <i>ENST00000314238</i> | -1,36 | 1,42E-01 | 3,85E-01 |
| <i>A_32_P227496</i>    | -1,07 | 1,42E-01 | 3,85E-01 |
| <i>A_24_P919727</i>    | 1,05  | 1,42E-01 | 3,85E-01 |
| <i>ENST00000217126</i> | 1,09  | 1,42E-01 | 3,85E-01 |
| <i>ZC3H7A</i>          | -1,05 | 1,42E-01 | 3,85E-01 |
| <i>C1orf125</i>        | -1,04 | 1,42E-01 | 3,85E-01 |
| <i>THC2404305</i>      | 1,06  | 1,43E-01 | 3,85E-01 |
| <i>PHTF1</i>           | 1,07  | 1,43E-01 | 3,85E-01 |
| <i>C19orf20</i>        | 1,08  | 1,43E-01 | 3,85E-01 |
| <i>SLC19A3</i>         | -1,07 | 1,43E-01 | 3,85E-01 |
| <i>AI424389</i>        | 1,06  | 1,43E-01 | 3,85E-01 |
| <i>PCDHB4</i>          | -1,10 | 1,43E-01 | 3,85E-01 |
| <i>ARL6</i>            | 1,05  | 1,43E-01 | 3,85E-01 |
| <i>ENST00000330861</i> | 1,10  | 1,43E-01 | 3,85E-01 |
| <i>A_24_P941404</i>    | -1,04 | 1,43E-01 | 3,85E-01 |
| <i>A_32_P942268</i>    | -1,07 | 1,43E-01 | 3,85E-01 |
| <i>TCF23</i>           | -1,13 | 1,43E-01 | 3,85E-01 |
| <i>HRASLS2</i>         | 1,06  | 1,43E-01 | 3,85E-01 |
| <i>A_32_P63826</i>     | -1,07 | 1,43E-01 | 3,85E-01 |
| <i>CCL17</i>           | 1,14  | 1,43E-01 | 3,85E-01 |
| <i>FREQ</i>            | 1,17  | 1,43E-01 | 3,86E-01 |
| <i>HAO2</i>            | 1,05  | 1,43E-01 | 3,86E-01 |
| <i>ARID2</i>           | -1,06 | 1,43E-01 | 3,86E-01 |
| <i>BG186548</i>        | -1,05 | 1,43E-01 | 3,86E-01 |
| <i>AA807922</i>        | 1,07  | 1,43E-01 | 3,86E-01 |
| <i>AK000809</i>        | -1,07 | 1,43E-01 | 3,86E-01 |
| <i>THC2455392</i>      | -1,07 | 1,43E-01 | 3,86E-01 |
| <i>BE703537</i>        | -1,07 | 1,43E-01 | 3,86E-01 |
| <i>FLJ20294</i>        | -1,05 | 1,43E-01 | 3,86E-01 |

|                        |       |          |          |
|------------------------|-------|----------|----------|
| <i>SH3YL1</i>          | -1,08 | 1,43E-01 | 3,86E-01 |
| <i>ENST00000374285</i> | -1,07 | 1,43E-01 | 3,87E-01 |
| <i>A_32_P73491</i>     | -1,06 | 1,44E-01 | 3,87E-01 |
| <i>PRMT7</i>           | -1,06 | 1,43E-01 | 3,87E-01 |
| <i>TBK1</i>            | -1,06 | 1,43E-01 | 3,87E-01 |
| <i>RBPSUHL</i>         | 1,07  | 1,44E-01 | 3,87E-01 |
| <i>AK094477</i>        | 1,07  | 1,43E-01 | 3,87E-01 |
| <i>FLJ12529</i>        | 1,08  | 1,43E-01 | 3,87E-01 |
| <i>HTATIP2</i>         | 1,08  | 1,44E-01 | 3,87E-01 |
| <i>UBOX5</i>           | -1,11 | 1,44E-01 | 3,87E-01 |
| <i>A_24_P560431</i>    | -1,07 | 1,44E-01 | 3,87E-01 |
| <i>USP19</i>           | 1,06  | 1,44E-01 | 3,87E-01 |
| <i>ANKS4B</i>          | 1,07  | 1,44E-01 | 3,87E-01 |
| <i>A_24_P480464</i>    | 1,09  | 1,44E-01 | 3,87E-01 |
| <i>SLC33A1</i>         | -1,09 | 1,44E-01 | 3,87E-01 |
| <i>THC2342265</i>      | -1,05 | 1,44E-01 | 3,87E-01 |
| <i>CRYBB1</i>          | -1,10 | 1,44E-01 | 3,87E-01 |
| <i>THC2334547</i>      | -1,06 | 1,44E-01 | 3,87E-01 |
| <i>NTHL1</i>           | 1,06  | 1,44E-01 | 3,87E-01 |
| <i>DIP</i>             | 1,07  | 1,44E-01 | 3,87E-01 |
| <i>ENST00000342841</i> | 1,04  | 1,44E-01 | 3,87E-01 |
| <i>TERF2</i>           | -1,07 | 1,44E-01 | 3,87E-01 |
| <i>THC2377258</i>      | 1,05  | 1,44E-01 | 3,87E-01 |
| <i>SLC9A9</i>          | -1,09 | 1,44E-01 | 3,87E-01 |
| <i>THC2278340</i>      | 1,09  | 1,44E-01 | 3,87E-01 |
| <i>AK054879</i>        | -1,06 | 1,44E-01 | 3,88E-01 |
| <i>MKS1</i>            | -1,06 | 1,44E-01 | 3,88E-01 |
| <i>MYOCD</i>           | 1,15  | 1,44E-01 | 3,88E-01 |
| <i>CACNA2D4</i>        | -1,07 | 1,44E-01 | 3,88E-01 |
| <i>GALNT11</i>         | -1,06 | 1,44E-01 | 3,88E-01 |
| <i>TM2D2</i>           | -1,05 | 1,44E-01 | 3,88E-01 |
| <i>UTP15</i>           | -1,05 | 1,44E-01 | 3,88E-01 |
| <i>AF119842</i>        | 1,04  | 1,44E-01 | 3,88E-01 |
| <i>EPHB2</i>           | -1,10 | 1,44E-01 | 3,88E-01 |
| <i>FLVCR</i>           | 1,06  | 1,44E-01 | 3,88E-01 |
| <i>AA807805</i>        | 1,06  | 1,44E-01 | 3,88E-01 |
| <i>S100Z</i>           | -1,08 | 1,44E-01 | 3,88E-01 |
| <i>DBT</i>             | -1,07 | 1,44E-01 | 3,88E-01 |
| <i>BQ028381</i>        | 1,05  | 1,44E-01 | 3,88E-01 |
| <i>BDH1</i>            | -1,11 | 1,45E-01 | 3,88E-01 |
| <i>CNBP</i>            | -1,08 | 1,45E-01 | 3,88E-01 |
| <i>THC2270592</i>      | -1,07 | 1,45E-01 | 3,88E-01 |
| <i>A_24_P935608</i>    | 1,05  | 1,45E-01 | 3,88E-01 |
| <i>ENST00000367612</i> | -1,07 | 1,45E-01 | 3,88E-01 |



|                        |       |          |          |
|------------------------|-------|----------|----------|
| <i>SRP9</i>            | -1,09 | 1,45E-01 | 3,88E-01 |
| <i>ENST00000284811</i> | 1,08  | 1,45E-01 | 3,88E-01 |
| <i>AV647560</i>        | 1,07  | 1,45E-01 | 3,88E-01 |
| <i>CCDC52</i>          | -1,06 | 1,45E-01 | 3,89E-01 |
| <i>ZNF342</i>          | -1,06 | 1,45E-01 | 3,89E-01 |
| <i>OR2M2</i>           | -1,07 | 1,45E-01 | 3,89E-01 |
| <i>GOLGA1</i>          | -1,04 | 1,45E-01 | 3,89E-01 |
| <i>ATF6</i>            | 1,07  | 1,45E-01 | 3,89E-01 |
| <i>GPR12</i>           | 1,09  | 1,45E-01 | 3,89E-01 |
| <i>NRIP3</i>           | -1,24 | 1,45E-01 | 3,89E-01 |
| <i>AI918632</i>        | 1,07  | 1,45E-01 | 3,89E-01 |
| <i>KIAA0913</i>        | -1,04 | 1,45E-01 | 3,89E-01 |
| <i>AK021606</i>        | 1,12  | 1,45E-01 | 3,89E-01 |
| <i>RINT1</i>           | -1,11 | 1,45E-01 | 3,89E-01 |
| <i>FLJ13611</i>        | -1,08 | 1,45E-01 | 3,89E-01 |
| <i>ENST00000329784</i> | -1,05 | 1,45E-01 | 3,89E-01 |
| <i>A_24_P384469</i>    | 1,05  | 1,45E-01 | 3,89E-01 |
| <i>ENST00000326678</i> | 1,06  | 1,45E-01 | 3,89E-01 |
| <i>BU587941</i>        | 1,08  | 1,45E-01 | 3,89E-01 |
| <i>THC2375493</i>      | 1,06  | 1,45E-01 | 3,89E-01 |
| <i>BC032907</i>        | 1,06  | 1,45E-01 | 3,89E-01 |
| <i>A_32_P78876</i>     | 1,06  | 1,45E-01 | 3,89E-01 |
| <i>ST3GAL4</i>         | 1,09  | 1,45E-01 | 3,89E-01 |
| <i>CPT1C</i>           | -1,10 | 1,45E-01 | 3,89E-01 |
| <i>ENST00000331458</i> | -1,07 | 1,45E-01 | 3,89E-01 |
| <i>TLL5</i>            | -1,05 | 1,45E-01 | 3,89E-01 |
| <i>PRR4</i>            | -1,05 | 1,45E-01 | 3,89E-01 |
| <i>ATP6AP2</i>         | 1,05  | 1,45E-01 | 3,89E-01 |
| <i>AF086216</i>        | 1,07  | 1,45E-01 | 3,89E-01 |
| <i>PRR5</i>            | 1,07  | 1,45E-01 | 3,89E-01 |
| <i>MAGEB4</i>          | 1,08  | 1,45E-01 | 3,89E-01 |
| <i>BC047636</i>        | 1,10  | 1,45E-01 | 3,89E-01 |
| <i>EVX1</i>            | 1,13  | 1,46E-01 | 3,90E-01 |
| <i>BQ000605</i>        | -1,10 | 1,46E-01 | 3,90E-01 |
| <i>CXCL1</i>           | 1,36  | 1,46E-01 | 3,90E-01 |
| <i>AY358240</i>        | -1,06 | 1,46E-01 | 3,90E-01 |
| <i>PPP1R14D</i>        | -1,05 | 1,46E-01 | 3,90E-01 |
| <i>AADAC</i>           | 1,05  | 1,46E-01 | 3,90E-01 |
| <i>ENST00000339986</i> | 1,06  | 1,46E-01 | 3,90E-01 |
| <i>BI869933</i>        | 1,09  | 1,46E-01 | 3,90E-01 |
| <i>EPHB6</i>           | 1,18  | 1,46E-01 | 3,90E-01 |
| <i>THC2376817</i>      | -1,07 | 1,46E-01 | 3,90E-01 |
| <i>EIF3S6IP</i>        | -1,06 | 1,46E-01 | 3,90E-01 |
| <i>A_24_P341427</i>    | 1,05  | 1,46E-01 | 3,90E-01 |

|                        |       |          |          |
|------------------------|-------|----------|----------|
| <i>NIPSNAP1</i>        | -1,07 | 1,46E-01 | 3,90E-01 |
| <i>BF368414</i>        | 1,07  | 1,46E-01 | 3,90E-01 |
| <i>POLR1C</i>          | -1,06 | 1,46E-01 | 3,90E-01 |
| <i>FCRL1</i>           | 1,05  | 1,46E-01 | 3,90E-01 |
| <i>ZFAND3</i>          | 1,05  | 1,46E-01 | 3,90E-01 |
| <i>THC2305677</i>      | 1,12  | 1,46E-01 | 3,90E-01 |
| <i>CCDC46</i>          | 1,06  | 1,46E-01 | 3,90E-01 |
| <i>PIK3C3</i>          | 1,07  | 1,46E-01 | 3,90E-01 |
| <i>THC2442231</i>      | -1,05 | 1,46E-01 | 3,90E-01 |
| <i>TCEAL4</i>          | -1,08 | 1,46E-01 | 3,90E-01 |
| <i>MCC</i>             | -1,08 | 1,46E-01 | 3,90E-01 |
| <i>A_24_P752279</i>    | 1,08  | 1,46E-01 | 3,91E-01 |
| <i>TAIP-2</i>          | -1,06 | 1,46E-01 | 3,91E-01 |
| <i>KIR2DL2</i>         | -1,04 | 1,46E-01 | 3,91E-01 |
| <i>EFHC2</i>           | -1,12 | 1,46E-01 | 3,91E-01 |
| <i>BM477617</i>        | -1,08 | 1,46E-01 | 3,91E-01 |
| <i>THC2376918</i>      | -1,07 | 1,46E-01 | 3,91E-01 |
| <i>IMPDH1</i>          | -1,06 | 1,46E-01 | 3,91E-01 |
| <i>FLJ13639</i>        | -1,06 | 1,46E-01 | 3,91E-01 |
| <i>NKIRAS2</i>         | 1,06  | 1,46E-01 | 3,91E-01 |
| <i>A_23_P370408</i>    | 1,08  | 1,46E-01 | 3,91E-01 |
| <i>CPSF1</i>           | -1,06 | 1,46E-01 | 3,91E-01 |
| <i>BC057844</i>        | 1,05  | 1,47E-01 | 3,91E-01 |
| <i>FLJ12886</i>        | -1,06 | 1,47E-01 | 3,91E-01 |
| <i>SLC39A4</i>         | -1,06 | 1,47E-01 | 3,91E-01 |
| <i>A_24_P187365</i>    | -1,06 | 1,47E-01 | 3,91E-01 |
| <i>ENST00000256367</i> | 1,07  | 1,47E-01 | 3,91E-01 |
| <i>TPR</i>             | 1,14  | 1,47E-01 | 3,91E-01 |
| <i>M69296</i>          | -1,07 | 1,47E-01 | 3,92E-01 |
| <i>CR608563</i>        | -1,08 | 1,47E-01 | 3,92E-01 |
| <i>SLURP1</i>          | 1,22  | 1,47E-01 | 3,92E-01 |
| <i>ABCB10</i>          | 1,07  | 1,47E-01 | 3,92E-01 |
| <i>ANXA13</i>          | -1,14 | 1,47E-01 | 3,92E-01 |
| <i>EPOR</i>            | -1,07 | 1,47E-01 | 3,92E-01 |
| <i>CAPZA1</i>          | -1,06 | 1,47E-01 | 3,92E-01 |
| <i>X98266</i>          | -1,05 | 1,47E-01 | 3,92E-01 |
| <i>H2BFS</i>           | -1,05 | 1,47E-01 | 3,92E-01 |
| <i>PSTPIP2</i>         | -1,05 | 1,47E-01 | 3,92E-01 |
| <i>GBP1</i>            | 1,17  | 1,47E-01 | 3,92E-01 |
| <i>A_24_P919502</i>    | -1,07 | 1,47E-01 | 3,92E-01 |
| <i>DAB2IP</i>          | 1,05  | 1,47E-01 | 3,92E-01 |
| <i>PHLPP</i>           | 1,06  | 1,47E-01 | 3,92E-01 |
| <i>P2RX7</i>           | 1,09  | 1,47E-01 | 3,92E-01 |
| <i>FLJ23569</i>        | 1,09  | 1,47E-01 | 3,92E-01 |

|                        |       |          |          |
|------------------------|-------|----------|----------|
| <i>ENST00000333310</i> | -1,22 | 1,47E-01 | 3,92E-01 |
| <i>CHPT1</i>           | 1,06  | 1,47E-01 | 3,92E-01 |
| <i>LOC388524</i>       | -1,04 | 1,47E-01 | 3,92E-01 |
| <i>LGTN</i>            | -1,04 | 1,47E-01 | 3,93E-01 |
| <i>THC2376140</i>      | 1,10  | 1,47E-01 | 3,93E-01 |
| <i>LOC440731</i>       | 1,07  | 1,47E-01 | 3,93E-01 |
| <i>ZDHHC7</i>          | -1,05 | 1,47E-01 | 3,93E-01 |
| <i>A_32_P122285</i>    | -1,14 | 1,48E-01 | 3,93E-01 |
| <i>BF575152</i>        | -1,07 | 1,48E-01 | 3,93E-01 |
| <i>DB325746</i>        | -1,06 | 1,48E-01 | 3,93E-01 |
| <i>CLDN12</i>          | -1,07 | 1,48E-01 | 3,93E-01 |
| <i>A_24_P127051</i>    | 1,07  | 1,48E-01 | 3,93E-01 |
| <i>A_24_P914549</i>    | 1,07  | 1,48E-01 | 3,93E-01 |
| <i>EIF4A2</i>          | -1,07 | 1,48E-01 | 3,93E-01 |
| <i>MRPL9</i>           | -1,06 | 1,48E-01 | 3,93E-01 |
| <i>BF217859</i>        | 1,08  | 1,48E-01 | 3,94E-01 |
| <i>THC2361804</i>      | -1,06 | 1,48E-01 | 3,94E-01 |
| <i>A_24_P920157</i>    | -1,04 | 1,48E-01 | 3,94E-01 |
| <i>AK090684</i>        | 1,06  | 1,48E-01 | 3,94E-01 |
| <i>A_32_P61074</i>     | 1,08  | 1,48E-01 | 3,94E-01 |
| <i>POP4</i>            | 1,04  | 1,48E-01 | 3,94E-01 |
| <i>AF090925</i>        | 1,06  | 1,48E-01 | 3,94E-01 |
| <i>NUDCD2</i>          | -1,06 | 1,48E-01 | 3,94E-01 |
| <i>LOC283849</i>       | 1,09  | 1,48E-01 | 3,94E-01 |
| <i>THC2284081</i>      | -1,08 | 1,48E-01 | 3,94E-01 |
| <i>KCNJ10</i>          | 1,05  | 1,48E-01 | 3,94E-01 |
| <i>A_24_P298962</i>    | -1,05 | 1,48E-01 | 3,95E-01 |
| <i>GMIP</i>            | -1,07 | 1,48E-01 | 3,95E-01 |
| <i>TMTC3</i>           | 1,12  | 1,48E-01 | 3,95E-01 |
| <i>HOXB13</i>          | 1,12  | 1,49E-01 | 3,95E-01 |
| <i>C1orf83</i>         | -1,06 | 1,49E-01 | 3,95E-01 |
| <i>BM681332</i>        | -1,05 | 1,49E-01 | 3,95E-01 |
| <i>CHRM5</i>           | -1,06 | 1,49E-01 | 3,95E-01 |
| <i>W72450</i>          | -1,04 | 1,49E-01 | 3,95E-01 |
| <i>NKX1-2</i>          | 1,09  | 1,49E-01 | 3,95E-01 |
| <i>S100A7L1</i>        | 1,10  | 1,49E-01 | 3,95E-01 |
| <i>FAM96A</i>          | -1,08 | 1,49E-01 | 3,95E-01 |
| <i>WFDC9</i>           | -1,05 | 1,49E-01 | 3,95E-01 |
| <i>GPR115</i>          | 1,05  | 1,49E-01 | 3,95E-01 |
| <i>IGF2BP3</i>         | -1,07 | 1,49E-01 | 3,95E-01 |
| <i>MGC10471</i>        | -1,06 | 1,49E-01 | 3,95E-01 |
| <i>A_24_P934423</i>    | -1,06 | 1,49E-01 | 3,95E-01 |
| <i>A_24_P196019</i>    | 1,07  | 1,49E-01 | 3,96E-01 |
| <i>THC2377351</i>      | 1,06  | 1,49E-01 | 3,96E-01 |

|                        |       |          |          |
|------------------------|-------|----------|----------|
| <i>C2orf12</i>         | 1,05  | 1,49E-01 | 3,96E-01 |
| <i>KIAA1881</i>        | -1,27 | 1,49E-01 | 3,96E-01 |
| <i>BC009463</i>        | 1,06  | 1,49E-01 | 3,96E-01 |
| <i>HIGD1B</i>          | 1,12  | 1,49E-01 | 3,96E-01 |
| <i>FLJ35348</i>        | -1,06 | 1,49E-01 | 3,96E-01 |
| <i>MAGEB1</i>          | 1,06  | 1,49E-01 | 3,96E-01 |
| <i>MLXIPL</i>          | 1,10  | 1,49E-01 | 3,96E-01 |
| <i>CDK5RAP3</i>        | -1,07 | 1,49E-01 | 3,96E-01 |
| <i>C6orf59</i>         | 1,10  | 1,49E-01 | 3,96E-01 |
| <i>XPA</i>             | -1,07 | 1,49E-01 | 3,96E-01 |
| <i>LRRC4C</i>          | -1,16 | 1,49E-01 | 3,96E-01 |
| <i>MYLIP</i>           | -1,13 | 1,50E-01 | 3,97E-01 |
| <i>WTAP</i>            | 1,06  | 1,50E-01 | 3,97E-01 |
| <i>CRADD</i>           | 1,05  | 1,50E-01 | 3,97E-01 |
| <i>THC2340907</i>      | 1,05  | 1,50E-01 | 3,97E-01 |
| <i>DZIP1</i>           | -1,11 | 1,50E-01 | 3,97E-01 |
| <i>BF761348</i>        | -1,07 | 1,50E-01 | 3,97E-01 |
| <i>BC051742</i>        | -1,06 | 1,50E-01 | 3,97E-01 |
| <i>MBD3L2</i>          | 1,05  | 1,50E-01 | 3,97E-01 |
| <i>AIRE</i>            | 1,09  | 1,50E-01 | 3,97E-01 |
| <i>ENST00000332101</i> | 1,05  | 1,50E-01 | 3,97E-01 |
| <i>A_24_P927054</i>    | -1,06 | 1,50E-01 | 3,97E-01 |
| <i>CC2D1B</i>          | 1,05  | 1,50E-01 | 3,97E-01 |
| <i>MGC33556</i>        | -1,07 | 1,50E-01 | 3,97E-01 |
| <i>THC2257370</i>      | 1,06  | 1,50E-01 | 3,97E-01 |
| <i>ENST00000377233</i> | -1,35 | 1,50E-01 | 3,97E-01 |
| <i>BTBD4</i>           | -1,06 | 1,50E-01 | 3,98E-01 |
| <i>DCN</i>             | -1,14 | 1,50E-01 | 3,98E-01 |
| <i>NCOA6</i>           | -1,07 | 1,50E-01 | 3,98E-01 |
| <i>NARS</i>            | -1,06 | 1,50E-01 | 3,98E-01 |
| <i>KIF2B</i>           | -1,06 | 1,50E-01 | 3,98E-01 |
| <i>FLJ21106</i>        | -1,05 | 1,50E-01 | 3,98E-01 |
| <i>BC069699</i>        | -1,04 | 1,50E-01 | 3,98E-01 |
| <i>P4HA3</i>           | 1,20  | 1,50E-01 | 3,98E-01 |
| <i>LOC651928</i>       | -1,56 | 1,50E-01 | 3,98E-01 |
| <i>RAE1</i>            | -1,05 | 1,50E-01 | 3,98E-01 |
| <i>THC2337721</i>      | -1,05 | 1,50E-01 | 3,98E-01 |
| <i>DOCK2</i>           | -1,06 | 1,50E-01 | 3,98E-01 |
| <i>CDC42EP1</i>        | 1,06  | 1,50E-01 | 3,98E-01 |
| <i>NR5A2</i>           | 1,06  | 1,50E-01 | 3,98E-01 |
| <i>SAMD1</i>           | 1,06  | 1,50E-01 | 3,98E-01 |
| <i>A_24_P600622</i>    | 1,07  | 1,50E-01 | 3,98E-01 |
| <i>A_24_P392505</i>    | 1,13  | 1,50E-01 | 3,98E-01 |
| <i>DUSP1</i>           | 1,33  | 1,50E-01 | 3,98E-01 |

|                        |       |          |          |
|------------------------|-------|----------|----------|
| <i>BBS7</i>            | -1,05 | 1,50E-01 | 3,98E-01 |
| <i>PAF1</i>            | 1,06  | 1,50E-01 | 3,98E-01 |
| <i>CD1A</i>            | -1,11 | 1,50E-01 | 3,98E-01 |
| <i>AF085968</i>        | -1,05 | 1,51E-01 | 3,98E-01 |
| <i>CRYBA4</i>          | -1,05 | 1,50E-01 | 3,98E-01 |
| <i>MMP20</i>           | 1,05  | 1,51E-01 | 3,98E-01 |
| <i>C14orf11</i>        | 1,07  | 1,51E-01 | 3,98E-01 |
| <i>GALNT9</i>          | -1,18 | 1,51E-01 | 3,98E-01 |
| <i>RNF44</i>           | -1,08 | 1,51E-01 | 3,98E-01 |
| <i>BC023989</i>        | -1,06 | 1,51E-01 | 3,98E-01 |
| <i>A_24_P392731</i>    | -1,05 | 1,51E-01 | 3,98E-01 |
| <i>A_24_P492885</i>    | -1,13 | 1,51E-01 | 3,98E-01 |
| <i>NMUR2</i>           | 1,06  | 1,51E-01 | 3,98E-01 |
| <i>ENST00000361845</i> | 1,08  | 1,51E-01 | 3,98E-01 |
| <i>ENST00000361681</i> | 1,14  | 1,51E-01 | 3,98E-01 |
| <i>C15orf32</i>        | 1,06  | 1,51E-01 | 3,98E-01 |
| <i>BC064969</i>        | 1,06  | 1,51E-01 | 3,98E-01 |
| <i>FAM18B2</i>         | -1,05 | 1,51E-01 | 3,98E-01 |
| <i>APLP2</i>           | 1,08  | 1,51E-01 | 3,98E-01 |
| <i>NOV</i>             | 1,33  | 1,51E-01 | 3,98E-01 |
| <i>CXCR4</i>           | 1,34  | 1,51E-01 | 3,98E-01 |
| <i>NBN</i>             | -1,11 | 1,51E-01 | 3,98E-01 |
| <i>BPHL</i>            | -1,05 | 1,51E-01 | 3,98E-01 |
| <i>SERPINB6</i>        | 1,05  | 1,51E-01 | 3,98E-01 |
| <i>THC2374944</i>      | 1,05  | 1,51E-01 | 3,99E-01 |
| <i>RPL17</i>           | -1,05 | 1,51E-01 | 3,99E-01 |
| <i>A_24_P826690</i>    | 1,07  | 1,51E-01 | 3,99E-01 |
| <i>ZNF347</i>          | -1,06 | 1,51E-01 | 3,99E-01 |
| <i>A_24_P356304</i>    | 1,06  | 1,51E-01 | 3,99E-01 |
| <i>DLL4</i>            | 1,08  | 1,51E-01 | 3,99E-01 |
| <i>ZDHHC22</i>         | -1,05 | 1,51E-01 | 3,99E-01 |
| <i>AK094175</i>        | -1,22 | 1,51E-01 | 3,99E-01 |
| <i>hCAP-D3</i>         | -1,07 | 1,51E-01 | 3,99E-01 |
| <i>PPFIA3</i>          | 1,07  | 1,51E-01 | 3,99E-01 |
| <i>LOC221362</i>       | 1,09  | 1,51E-01 | 3,99E-01 |
| <i>NOSTRIN</i>         | -1,13 | 1,51E-01 | 3,99E-01 |
| <i>PDE11A</i>          | -1,05 | 1,51E-01 | 3,99E-01 |
| <i>TPD52L3</i>         | 1,05  | 1,51E-01 | 3,99E-01 |
| <i>CAP1</i>            | 1,08  | 1,51E-01 | 3,99E-01 |
| <i>SOD1</i>            | 1,05  | 1,51E-01 | 3,99E-01 |
| <i>SKIP</i>            | 1,07  | 1,51E-01 | 3,99E-01 |
| <i>C15orf39</i>        | -1,06 | 1,51E-01 | 3,99E-01 |
| <i>A_32_P441530</i>    | 1,09  | 1,51E-01 | 3,99E-01 |
| <i>A_24_P834210</i>    | 1,10  | 1,51E-01 | 3,99E-01 |

|                        |       |          |          |
|------------------------|-------|----------|----------|
| <i>CPM</i>             | 1,15  | 1,51E-01 | 3,99E-01 |
| <i>MUM1</i>            | -1,06 | 1,52E-01 | 3,99E-01 |
| <i>C13orf24</i>        | -1,06 | 1,52E-01 | 3,99E-01 |
| <i>BCL11B</i>          | -1,14 | 1,52E-01 | 3,99E-01 |
| <i>IGF2R</i>           | 1,05  | 1,52E-01 | 3,99E-01 |
| <i>DLX5</i>            | 1,05  | 1,52E-01 | 3,99E-01 |
| <i>SLC4A3</i>          | -1,15 | 1,52E-01 | 3,99E-01 |
| <i>BAIAP2L1</i>        | 1,06  | 1,52E-01 | 3,99E-01 |
| <i>C17orf61</i>        | -1,05 | 1,52E-01 | 3,99E-01 |
| <i>SLC34A3</i>         | 1,07  | 1,52E-01 | 3,99E-01 |
| <i>CR610949</i>        | 1,14  | 1,52E-01 | 3,99E-01 |
| <i>AF085895</i>        | -1,04 | 1,52E-01 | 3,99E-01 |
| <i>AK026789</i>        | 1,06  | 1,52E-01 | 4,00E-01 |
| <i>DUSP18</i>          | 1,07  | 1,52E-01 | 4,00E-01 |
| <i>A_24_P917595</i>    | -1,06 | 1,52E-01 | 4,00E-01 |
| <i>EB386378</i>        | 1,07  | 1,52E-01 | 4,00E-01 |
| <i>WNT5A</i>           | -1,15 | 1,52E-01 | 4,00E-01 |
| <i>FZD1</i>            | -1,10 | 1,52E-01 | 4,00E-01 |
| <i>TSHZ3</i>           | -1,09 | 1,52E-01 | 4,00E-01 |
| <i>FBXO46</i>          | -1,08 | 1,52E-01 | 4,00E-01 |
| <i>PITPNA</i>          | -1,06 | 1,52E-01 | 4,00E-01 |
| <i>ACTR5</i>           | -1,05 | 1,52E-01 | 4,00E-01 |
| <i>C1orf69</i>         | 1,05  | 1,52E-01 | 4,00E-01 |
| <i>PIGK</i>            | 1,06  | 1,52E-01 | 4,00E-01 |
| <i>LRP2</i>            | 1,07  | 1,52E-01 | 4,00E-01 |
| <i>DKFZp586l1420</i>   | 1,09  | 1,52E-01 | 4,00E-01 |
| <i>A_24_P349547</i>    | 1,11  | 1,52E-01 | 4,00E-01 |
| <i>TDGF1</i>           | -1,09 | 1,52E-01 | 4,00E-01 |
| <i>A_32_P406186</i>    | -1,08 | 1,52E-01 | 4,00E-01 |
| <i>PNPLA4</i>          | -1,08 | 1,52E-01 | 4,00E-01 |
| <i>VPREB1</i>          | -1,06 | 1,52E-01 | 4,00E-01 |
| <i>HKR2</i>            | -1,06 | 1,52E-01 | 4,00E-01 |
| <i>ENST00000355968</i> | 1,05  | 1,52E-01 | 4,00E-01 |
| <i>A_24_P481314</i>    | 1,06  | 1,52E-01 | 4,00E-01 |
| <i>FTS</i>             | 1,07  | 1,52E-01 | 4,00E-01 |
| <i>ORAOV1</i>          | -1,05 | 1,52E-01 | 4,00E-01 |
| <i>ENST00000369889</i> | 1,05  | 1,52E-01 | 4,00E-01 |
| <i>ADAMTS9</i>         | -1,22 | 1,52E-01 | 4,00E-01 |
| <i>SAG</i>             | -1,11 | 1,52E-01 | 4,00E-01 |
| <i>WDFY1</i>           | -1,06 | 1,52E-01 | 4,00E-01 |
| <i>C14orf108</i>       | -1,05 | 1,52E-01 | 4,00E-01 |
| <i>U79293</i>          | -1,18 | 1,52E-01 | 4,00E-01 |
| <i>CYP3A5</i>          | -1,09 | 1,52E-01 | 4,00E-01 |
| <i>GINS1</i>           | -1,06 | 1,52E-01 | 4,00E-01 |

|                     |       |          |          |
|---------------------|-------|----------|----------|
| <i>C1orf48</i>      | -1,05 | 1,52E-01 | 4,00E-01 |
| <i>RFK</i>          | 1,06  | 1,53E-01 | 4,00E-01 |
| <i>RUTBC2</i>       | 1,08  | 1,53E-01 | 4,00E-01 |
| <i>PSME1</i>        | -1,04 | 1,53E-01 | 4,01E-01 |
| <i>A_24_P915541</i> | 1,06  | 1,53E-01 | 4,01E-01 |
| <i>BC011940</i>     | 1,09  | 1,53E-01 | 4,01E-01 |
| <i>AI276257</i>     | -1,08 | 1,53E-01 | 4,01E-01 |
| <i>LOC641827</i>    | -1,05 | 1,53E-01 | 4,01E-01 |
| <i>BC030522</i>     | 1,06  | 1,53E-01 | 4,01E-01 |
| <i>ADAMTS2</i>      | 1,11  | 1,53E-01 | 4,01E-01 |
| <i>CD19</i>         | -1,10 | 1,53E-01 | 4,01E-01 |
| <i>SLC12A1</i>      | -1,04 | 1,53E-01 | 4,01E-01 |
| <i>A_24_P924739</i> | 1,05  | 1,53E-01 | 4,01E-01 |
| <i>C14orf28</i>     | 1,08  | 1,53E-01 | 4,01E-01 |
| <i>ITGA8</i>        | 1,29  | 1,53E-01 | 4,01E-01 |
| <i>CNGA1</i>        | -1,15 | 1,53E-01 | 4,01E-01 |
| <i>A_32_P31321</i>  | -1,08 | 1,53E-01 | 4,01E-01 |
| <i>ALAS1</i>        | 1,05  | 1,53E-01 | 4,01E-01 |
| <i>THC2441612</i>   | 1,08  | 1,53E-01 | 4,01E-01 |
| <i>A_24_P911553</i> | -1,06 | 1,53E-01 | 4,01E-01 |
| <i>MGC10814</i>     | -1,14 | 1,53E-01 | 4,01E-01 |
| <i>ZNF431</i>       | -1,09 | 1,53E-01 | 4,01E-01 |
| <i>A_23_P51966</i>  | -1,06 | 1,53E-01 | 4,01E-01 |
| <i>THC2317952</i>   | 1,07  | 1,53E-01 | 4,01E-01 |
| <i>PHLDB2</i>       | 1,14  | 1,53E-01 | 4,01E-01 |
| <i>GRIN3A</i>       | -1,11 | 1,53E-01 | 4,01E-01 |
| <i>ROR2</i>         | -1,12 | 1,53E-01 | 4,01E-01 |
| <i>A_32_P53670</i>  | -1,05 | 1,53E-01 | 4,01E-01 |
| <i>SPPL2B</i>       | 1,07  | 1,53E-01 | 4,01E-01 |
| <i>SYT6</i>         | -1,07 | 1,53E-01 | 4,01E-01 |
| <i>TMEM50A</i>      | 1,04  | 1,53E-01 | 4,01E-01 |
| <i>GPRC5B</i>       | -1,11 | 1,53E-01 | 4,01E-01 |
| <i>RPL8</i>         | -1,05 | 1,53E-01 | 4,01E-01 |
| <i>THC2365798</i>   | 1,07  | 1,53E-01 | 4,01E-01 |
| <i>KIAA0196</i>     | -1,05 | 1,53E-01 | 4,01E-01 |
| <i>AW627852</i>     | 1,10  | 1,53E-01 | 4,01E-01 |
| <i>FLJ90680</i>     | -1,07 | 1,53E-01 | 4,01E-01 |
| <i>LGALS4</i>       | 1,06  | 1,53E-01 | 4,01E-01 |
| <i>A_32_P55438</i>  | 1,14  | 1,53E-01 | 4,01E-01 |
| <i>THC2438671</i>   | -1,06 | 1,53E-01 | 4,01E-01 |
| <i>AY170823</i>     | 1,09  | 1,53E-01 | 4,01E-01 |
| <i>BTN2A2</i>       | -1,04 | 1,53E-01 | 4,01E-01 |
| <i>AW235110</i>     | -1,05 | 1,53E-01 | 4,01E-01 |
| <i>POLR1E</i>       | 1,06  | 1,53E-01 | 4,01E-01 |

|                 |       |          |          |
|-----------------|-------|----------|----------|
| MCM2            | -1,07 | 1,54E-01 | 4,01E-01 |
| A_24_P547010    | -1,05 | 1,54E-01 | 4,01E-01 |
| PCDHA1          | -1,10 | 1,54E-01 | 4,01E-01 |
| ENST00000326261 | -1,18 | 1,54E-01 | 4,02E-01 |
| ENST00000378263 | 1,06  | 1,54E-01 | 4,02E-01 |
| FLJ35700        | 1,10  | 1,54E-01 | 4,02E-01 |
| THC2261399      | -1,07 | 1,54E-01 | 4,02E-01 |
| MGC29671        | -1,08 | 1,54E-01 | 4,02E-01 |
| LMOD1           | 1,21  | 1,54E-01 | 4,02E-01 |
| ENST00000374019 | -1,06 | 1,54E-01 | 4,02E-01 |
| LOC348262       | 1,05  | 1,54E-01 | 4,02E-01 |
| ENST00000341087 | -1,12 | 1,54E-01 | 4,02E-01 |
| ZNF549          | -1,07 | 1,54E-01 | 4,02E-01 |
| A_23_P111766    | -1,16 | 1,54E-01 | 4,02E-01 |
| TTY9A           | 1,03  | 1,54E-01 | 4,02E-01 |
| AW377662        | -1,06 | 1,54E-01 | 4,02E-01 |
| TUBB2B          | 1,28  | 1,54E-01 | 4,02E-01 |
| DNAJB12         | 1,05  | 1,54E-01 | 4,02E-01 |
| THC2319209      | 1,05  | 1,54E-01 | 4,02E-01 |
| ELTD1           | 1,10  | 1,54E-01 | 4,03E-01 |
| ENST00000370857 | -1,09 | 1,54E-01 | 4,03E-01 |
| BPIL3           | 1,06  | 1,54E-01 | 4,03E-01 |
| A_24_P874007    | 1,04  | 1,54E-01 | 4,03E-01 |
| A_24_P418176    | 1,07  | 1,54E-01 | 4,03E-01 |
| HABP2           | 1,05  | 1,54E-01 | 4,03E-01 |
| THC2339772      | -1,09 | 1,54E-01 | 4,03E-01 |
| FLJ31951        | 1,06  | 1,54E-01 | 4,03E-01 |
| TXNDC10         | 1,06  | 1,55E-01 | 4,03E-01 |
| BG818013        | 1,06  | 1,55E-01 | 4,03E-01 |
| THC2307226      | -1,04 | 1,55E-01 | 4,03E-01 |
| SLC45A2         | 1,06  | 1,55E-01 | 4,03E-01 |
| HSH2D           | -1,10 | 1,55E-01 | 4,03E-01 |
| LOC339240       | 1,06  | 1,55E-01 | 4,03E-01 |
| RGL2            | 1,08  | 1,55E-01 | 4,03E-01 |
| MRE11A          | 1,07  | 1,55E-01 | 4,03E-01 |
| THC2375818      | 1,06  | 1,55E-01 | 4,04E-01 |
| AA360388        | 1,10  | 1,55E-01 | 4,04E-01 |
| A_32_P1841      | -1,11 | 1,55E-01 | 4,04E-01 |
| OR51A7          | 1,06  | 1,55E-01 | 4,04E-01 |
| CPZ             | -1,21 | 1,55E-01 | 4,04E-01 |
| EPHB4           | -1,09 | 1,55E-01 | 4,04E-01 |
| A_32_P118556    | -1,08 | 1,55E-01 | 4,04E-01 |
| DNHD1           | -1,06 | 1,55E-01 | 4,04E-01 |
| A_24_P153363    | 1,05  | 1,55E-01 | 4,04E-01 |



|                 |       |          |          |
|-----------------|-------|----------|----------|
| A_24_P273214    | 1,09  | 1,55E-01 | 4,04E-01 |
| TRPC1           | -1,10 | 1,55E-01 | 4,04E-01 |
| ZNF510          | -1,06 | 1,55E-01 | 4,04E-01 |
| PARP11          | -1,05 | 1,55E-01 | 4,04E-01 |
| THC2271786      | 1,06  | 1,55E-01 | 4,04E-01 |
| ATG12           | 1,04  | 1,55E-01 | 4,04E-01 |
| BG181351        | -1,06 | 1,55E-01 | 4,04E-01 |
| OR1A1           | 1,06  | 1,55E-01 | 4,04E-01 |
| THC2441778      | -1,06 | 1,55E-01 | 4,04E-01 |
| CB306038        | -1,10 | 1,55E-01 | 4,04E-01 |
| AL359055        | -1,09 | 1,55E-01 | 4,04E-01 |
| BBS2            | -1,07 | 1,55E-01 | 4,04E-01 |
| TRAPPC2         | -1,06 | 1,55E-01 | 4,04E-01 |
| ESM1            | 1,14  | 1,55E-01 | 4,04E-01 |
| A_32_P124392    | -1,06 | 1,55E-01 | 4,04E-01 |
| C1orf34         | 1,13  | 1,55E-01 | 4,04E-01 |
| NOVA2           | -1,05 | 1,55E-01 | 4,04E-01 |
| AF052141        | -1,11 | 1,55E-01 | 4,04E-01 |
| LOC643313       | -1,08 | 1,55E-01 | 4,04E-01 |
| A_32_P208328    | -1,07 | 1,55E-01 | 4,04E-01 |
| BC039151        | -1,06 | 1,55E-01 | 4,04E-01 |
| DAO             | -1,05 | 1,55E-01 | 4,04E-01 |
| DB380193        | 1,05  | 1,55E-01 | 4,04E-01 |
| A_32_P1291      | 1,05  | 1,55E-01 | 4,04E-01 |
| SPPL2A          | 1,06  | 1,55E-01 | 4,04E-01 |
| THC2377219      | 1,07  | 1,55E-01 | 4,04E-01 |
| EMCN            | 1,12  | 1,55E-01 | 4,04E-01 |
| ENST00000367932 | 1,15  | 1,55E-01 | 4,04E-01 |
| ENST00000229088 | -1,07 | 1,56E-01 | 4,04E-01 |
| BG680979        | -1,06 | 1,56E-01 | 4,04E-01 |
| A_24_P247169    | 1,08  | 1,56E-01 | 4,05E-01 |
| JAGN1           | -1,06 | 1,56E-01 | 4,05E-01 |
| AK124396        | -1,17 | 1,56E-01 | 4,05E-01 |
| AF116715        | -1,07 | 1,56E-01 | 4,05E-01 |
| ENST00000325371 | 1,11  | 1,56E-01 | 4,05E-01 |
| SC5DL           | -1,07 | 1,56E-01 | 4,05E-01 |
| AK097894        | -1,05 | 1,56E-01 | 4,05E-01 |
| ENST00000295399 | 1,07  | 1,56E-01 | 4,05E-01 |
| A_23_P50320     | -1,08 | 1,56E-01 | 4,05E-01 |
| ENST00000373335 | -1,07 | 1,56E-01 | 4,05E-01 |
| CD1C            | -1,15 | 1,56E-01 | 4,05E-01 |
| A_32_P228601    | 1,06  | 1,56E-01 | 4,05E-01 |
| THC2433234      | -1,12 | 1,56E-01 | 4,05E-01 |
| C15orf41        | -1,08 | 1,56E-01 | 4,05E-01 |

|                        |       |          |          |
|------------------------|-------|----------|----------|
| <i>THC2445411</i>      | -1,07 | 1,56E-01 | 4,05E-01 |
| <i>ENST00000296015</i> | -1,06 | 1,56E-01 | 4,05E-01 |
| <i>ATP6VOA1</i>        | -1,06 | 1,56E-01 | 4,05E-01 |
| <i>HMGNA4</i>          | -1,06 | 1,56E-01 | 4,05E-01 |
| <i>CRSP2</i>           | -1,05 | 1,56E-01 | 4,05E-01 |
| <i>BE769489</i>        | 1,06  | 1,56E-01 | 4,05E-01 |
| <i>GH1</i>             | 1,07  | 1,56E-01 | 4,05E-01 |
| <i>MAD1L1</i>          | 1,07  | 1,56E-01 | 4,05E-01 |
| <i>APOBEC3B</i>        | 1,09  | 1,56E-01 | 4,05E-01 |
| <i>MGC13017</i>        | -1,06 | 1,56E-01 | 4,05E-01 |
| <i>ARFRP1</i>          | 1,06  | 1,56E-01 | 4,05E-01 |
| <i>STK16</i>           | 1,05  | 1,56E-01 | 4,06E-01 |
| <i>THC2271659</i>      | -1,10 | 1,56E-01 | 4,06E-01 |
| <i>OR10H3</i>          | -1,06 | 1,56E-01 | 4,06E-01 |
| <i>THC2458785</i>      | -1,09 | 1,56E-01 | 4,06E-01 |
| <i>CF529502</i>        | -1,07 | 1,56E-01 | 4,06E-01 |
| <i>BI820554</i>        | 1,06  | 1,56E-01 | 4,06E-01 |
| <i>THC2274340</i>      | -1,07 | 1,56E-01 | 4,06E-01 |
| <i>YTHDF1</i>          | -1,05 | 1,57E-01 | 4,06E-01 |
| <i>HBXIP</i>           | 1,05  | 1,57E-01 | 4,06E-01 |
| <i>RLTPR</i>           | 1,07  | 1,57E-01 | 4,06E-01 |
| <i>AK054572</i>        | -1,07 | 1,57E-01 | 4,06E-01 |
| <i>SART3</i>           | -1,04 | 1,57E-01 | 4,06E-01 |
| <i>DTNBP1</i>          | 1,06  | 1,57E-01 | 4,06E-01 |
| <i>AF130086</i>        | -1,06 | 1,57E-01 | 4,06E-01 |
| <i>A_23_P154006</i>    | -1,06 | 1,57E-01 | 4,06E-01 |
| <i>ENST00000324928</i> | -1,05 | 1,57E-01 | 4,06E-01 |
| <i>BC017563</i>        | 1,06  | 1,57E-01 | 4,06E-01 |
| <i>C6orf162</i>        | -1,05 | 1,57E-01 | 4,06E-01 |
| <i>SLCO2A1</i>         | 1,18  | 1,57E-01 | 4,06E-01 |
| <i>AK096239</i>        | -1,05 | 1,57E-01 | 4,06E-01 |
| <i>ENST00000310344</i> | 1,04  | 1,57E-01 | 4,06E-01 |
| <i>MUTED</i>           | -1,06 | 1,57E-01 | 4,06E-01 |
| <i>NUMB</i>            | -1,06 | 1,57E-01 | 4,06E-01 |
| <i>PRO0132</i>         | 1,04  | 1,57E-01 | 4,07E-01 |
| <i>MBOAT2</i>          | -1,10 | 1,57E-01 | 4,07E-01 |
| <i>MGC31957</i>        | -1,05 | 1,57E-01 | 4,07E-01 |
| <i>AK074662</i>        | 1,05  | 1,57E-01 | 4,07E-01 |
| <i>THC2292002</i>      | -1,06 | 1,57E-01 | 4,07E-01 |
| <i>WIRE</i>            | -1,05 | 1,57E-01 | 4,07E-01 |
| <i>GNG3</i>            | 1,07  | 1,57E-01 | 4,07E-01 |
| <i>XTP7</i>            | 1,09  | 1,57E-01 | 4,07E-01 |
| <i>C8orf72</i>         | -1,08 | 1,57E-01 | 4,07E-01 |
| <i>DKFZP564C196</i>    | 1,05  | 1,58E-01 | 4,08E-01 |

|                     |       |          |          |
|---------------------|-------|----------|----------|
| <i>GDI1</i>         | -1,06 | 1,58E-01 | 4,08E-01 |
| <i>A_24_P941515</i> | -1,05 | 1,58E-01 | 4,08E-01 |
| <i>PCDHGB4</i>      | -1,08 | 1,58E-01 | 4,08E-01 |
| <i>TTRAP</i>        | -1,07 | 1,58E-01 | 4,08E-01 |
| <i>A_32_P172698</i> | 1,04  | 1,58E-01 | 4,08E-01 |
| <i>KIAA1462</i>     | 1,07  | 1,58E-01 | 4,08E-01 |
| <i>ARHGAP30</i>     | -1,08 | 1,58E-01 | 4,08E-01 |
| <i>BC066346</i>     | 1,04  | 1,58E-01 | 4,08E-01 |
| <i>TBX10</i>        | 1,05  | 1,58E-01 | 4,08E-01 |
| <i>THRAP4</i>       | 1,05  | 1,58E-01 | 4,08E-01 |
| <i>RBM12</i>        | -1,05 | 1,58E-01 | 4,08E-01 |
| <i>CD300LF</i>      | -1,05 | 1,58E-01 | 4,08E-01 |
| <i>AF007190</i>     | 1,05  | 1,58E-01 | 4,08E-01 |
| <i>PRKAB1</i>       | -1,07 | 1,58E-01 | 4,09E-01 |
| <i>CBLB</i>         | -1,06 | 1,58E-01 | 4,09E-01 |
| <i>EIF4G1</i>       | 1,07  | 1,58E-01 | 4,09E-01 |
| <i>CD37</i>         | -1,09 | 1,58E-01 | 4,09E-01 |
| <i>AF305819</i>     | -1,04 | 1,58E-01 | 4,09E-01 |
| <i>COL4A2</i>       | 1,13  | 1,58E-01 | 4,09E-01 |
| <i>A_24_P174063</i> | -1,08 | 1,58E-01 | 4,09E-01 |
| <i>GRIP2</i>        | -1,13 | 1,58E-01 | 4,09E-01 |
| <i>CCDC12</i>       | -1,05 | 1,58E-01 | 4,09E-01 |
| <i>THC2423500</i>   | -1,17 | 1,58E-01 | 4,09E-01 |
| <i>SLC39A13</i>     | -1,06 | 1,58E-01 | 4,09E-01 |
| <i>BNIP1</i>        | -1,05 | 1,58E-01 | 4,09E-01 |
| <i>C9orf19</i>      | 1,10  | 1,58E-01 | 4,09E-01 |
| <i>WDR45</i>        | 1,05  | 1,59E-01 | 4,09E-01 |
| <i>AK022065</i>     | 1,10  | 1,59E-01 | 4,09E-01 |
| <i>TTC9B</i>        | 1,06  | 1,59E-01 | 4,09E-01 |
| <i>A_23_P376449</i> | 1,09  | 1,59E-01 | 4,09E-01 |
| <i>SMARCD3</i>      | 1,09  | 1,59E-01 | 4,09E-01 |
| <i>BI256572</i>     | -1,05 | 1,59E-01 | 4,09E-01 |
| <i>ZNF620</i>       | 1,07  | 1,59E-01 | 4,09E-01 |
| <i>LOC158960</i>    | -1,06 | 1,59E-01 | 4,09E-01 |
| <i>A_24_P631625</i> | 1,27  | 1,59E-01 | 4,09E-01 |
| <i>THC2298610</i>   | -1,10 | 1,59E-01 | 4,09E-01 |
| <i>RNF36</i>        | 1,05  | 1,59E-01 | 4,09E-01 |
| <i>DAZAP1</i>       | 1,05  | 1,59E-01 | 4,09E-01 |
| <i>A_24_P753638</i> | 1,06  | 1,59E-01 | 4,10E-01 |
| <i>DBR1</i>         | -1,06 | 1,59E-01 | 4,10E-01 |
| <i>MAD2L2</i>       | 1,05  | 1,59E-01 | 4,10E-01 |
| <i>BOLA2B</i>       | 1,06  | 1,59E-01 | 4,10E-01 |
| <i>CMTM7</i>        | -1,08 | 1,59E-01 | 4,10E-01 |
| <i>ST8SIA1</i>      | 1,11  | 1,59E-01 | 4,10E-01 |

|                 |       |          |          |
|-----------------|-------|----------|----------|
| AA232904        | -1,05 | 1,59E-01 | 4,10E-01 |
| LRRRC28         | -1,04 | 1,59E-01 | 4,10E-01 |
| LOC648245       | 1,07  | 1,59E-01 | 4,10E-01 |
| A_24_P144163    | -1,05 | 1,59E-01 | 4,10E-01 |
| PPP1R9B         | -1,04 | 1,59E-01 | 4,10E-01 |
| X86121          | 1,07  | 1,59E-01 | 4,10E-01 |
| A_24_P392910    | 1,07  | 1,59E-01 | 4,10E-01 |
| A_24_P101694    | -1,07 | 1,59E-01 | 4,10E-01 |
| ALKBH8          | 1,07  | 1,59E-01 | 4,10E-01 |
| THC2380120      | 1,06  | 1,59E-01 | 4,10E-01 |
| THC2373083      | -1,06 | 1,59E-01 | 4,10E-01 |
| LOC285878       | 1,17  | 1,59E-01 | 4,10E-01 |
| ENPP3           | -1,08 | 1,59E-01 | 4,10E-01 |
| SLC43A3         | 1,08  | 1,59E-01 | 4,10E-01 |
| LOC51252        | 1,05  | 1,59E-01 | 4,11E-01 |
| HSPA8           | 1,08  | 1,59E-01 | 4,11E-01 |
| CA312433        | 1,06  | 1,60E-01 | 4,11E-01 |
| SMS             | -1,07 | 1,60E-01 | 4,11E-01 |
| ZNF479          | -1,09 | 1,60E-01 | 4,11E-01 |
| MARCKS          | -1,09 | 1,60E-01 | 4,11E-01 |
| A_24_P195400    | -1,06 | 1,60E-01 | 4,11E-01 |
| TINAG           | 1,06  | 1,60E-01 | 4,11E-01 |
| RPL19           | -1,05 | 1,60E-01 | 4,11E-01 |
| RBKS            | -1,07 | 1,60E-01 | 4,11E-01 |
| TBC1D3          | -1,09 | 1,60E-01 | 4,11E-01 |
| NUDT11          | -1,11 | 1,60E-01 | 4,11E-01 |
| ARHGEF9         | 1,06  | 1,60E-01 | 4,11E-01 |
| PRKCB1          | -1,22 | 1,60E-01 | 4,12E-01 |
| AKO54852        | -1,08 | 1,60E-01 | 4,12E-01 |
| XYLT2           | -1,07 | 1,60E-01 | 4,12E-01 |
| GDAP1           | 1,07  | 1,60E-01 | 4,12E-01 |
| PPM1L           | -1,10 | 1,60E-01 | 4,12E-01 |
| BUB1B           | -1,06 | 1,60E-01 | 4,12E-01 |
| MLN             | 1,04  | 1,60E-01 | 4,12E-01 |
| ENST00000295844 | -1,05 | 1,60E-01 | 4,12E-01 |
| AA903523        | 1,06  | 1,61E-01 | 4,12E-01 |
| SPOCD1          | -1,28 | 1,61E-01 | 4,13E-01 |
| AF289562        | -1,10 | 1,61E-01 | 4,13E-01 |
| D70835          | -1,08 | 1,61E-01 | 4,13E-01 |
| A_24_P534290    | -1,08 | 1,61E-01 | 4,13E-01 |
| BC033528        | 1,05  | 1,61E-01 | 4,13E-01 |
| CCDC107         | 1,10  | 1,61E-01 | 4,13E-01 |
| KRTAP17-1       | -1,10 | 1,61E-01 | 4,13E-01 |
| ENST00000360555 | -1,06 | 1,61E-01 | 4,13E-01 |

|                        |       |          |          |
|------------------------|-------|----------|----------|
| <i>GRIA1</i>           | -1,05 | 1,61E-01 | 4,13E-01 |
| <i>THC2314369</i>      | 1,06  | 1,61E-01 | 4,13E-01 |
| <i>SARS2</i>           | -1,06 | 1,61E-01 | 4,13E-01 |
| <i>AV739735</i>        | 1,07  | 1,61E-01 | 4,13E-01 |
| <i>PSCA</i>            | -1,18 | 1,61E-01 | 4,13E-01 |
| <i>LOC441052</i>       | -1,28 | 1,61E-01 | 4,13E-01 |
| <i>ZHX2</i>            | -1,09 | 1,61E-01 | 4,13E-01 |
| <i>CX40.1</i>          | 1,04  | 1,61E-01 | 4,13E-01 |
| <i>C8orf66</i>         | -1,06 | 1,61E-01 | 4,13E-01 |
| <i>PRB2</i>            | -1,05 | 1,61E-01 | 4,13E-01 |
| <i>DBC1</i>            | -1,08 | 1,61E-01 | 4,13E-01 |
| <i>THC2323640</i>      | -1,06 | 1,61E-01 | 4,13E-01 |
| <i>PSME2</i>           | -1,06 | 1,61E-01 | 4,14E-01 |
| <i>A_24_P169903</i>    | -1,07 | 1,61E-01 | 4,14E-01 |
| <i>SMN2</i>            | -1,07 | 1,61E-01 | 4,14E-01 |
| <i>RAD23B</i>          | -1,06 | 1,61E-01 | 4,14E-01 |
| <i>A_32_P63886</i>     | 1,05  | 1,61E-01 | 4,14E-01 |
| <i>ATP5H</i>           | 1,06  | 1,61E-01 | 4,14E-01 |
| <i>CLDN14</i>          | 1,06  | 1,61E-01 | 4,14E-01 |
| <i>WWC3</i>            | 1,07  | 1,61E-01 | 4,14E-01 |
| <i>RP11-167P23.2</i>   | 1,07  | 1,61E-01 | 4,14E-01 |
| <i>ETV7</i>            | 1,09  | 1,61E-01 | 4,14E-01 |
| <i>LDLRAD1</i>         | -1,06 | 1,61E-01 | 4,14E-01 |
| <i>TFIP11</i>          | 1,04  | 1,61E-01 | 4,14E-01 |
| <i>A_24_P144556</i>    | 1,07  | 1,61E-01 | 4,14E-01 |
| <i>ENST00000333392</i> | 1,08  | 1,61E-01 | 4,14E-01 |
| <i>FCRL3</i>           | -1,04 | 1,61E-01 | 4,14E-01 |
| <i>GPR103</i>          | 1,08  | 1,61E-01 | 4,14E-01 |
| <i>ZNF8</i>            | -1,05 | 1,62E-01 | 4,14E-01 |
| <i>ZNF101</i>          | 1,06  | 1,62E-01 | 4,14E-01 |
| <i>MOV10L1</i>         | 1,08  | 1,62E-01 | 4,14E-01 |
| <i>A_24_P213277</i>    | 1,13  | 1,62E-01 | 4,14E-01 |
| <i>MBOAT1</i>          | -1,12 | 1,62E-01 | 4,14E-01 |
| <i>BDH2</i>            | -1,08 | 1,62E-01 | 4,14E-01 |
| <i>RGS12</i>           | 1,05  | 1,62E-01 | 4,14E-01 |
| <i>WFDC10B</i>         | 1,06  | 1,62E-01 | 4,14E-01 |
| <i>THC2313065</i>      | -1,06 | 1,62E-01 | 4,14E-01 |
| <i>AW188368</i>        | -1,05 | 1,62E-01 | 4,14E-01 |
| <i>PABPN1</i>          | -1,04 | 1,62E-01 | 4,14E-01 |
| <i>FCGBP</i>           | -1,26 | 1,62E-01 | 4,14E-01 |
| <i>RP6-213H19.1</i>    | -1,20 | 1,62E-01 | 4,14E-01 |
| <i>LSM12</i>           | 1,09  | 1,62E-01 | 4,14E-01 |
| <i>AK097637</i>        | -1,05 | 1,62E-01 | 4,14E-01 |
| <i>NPY1R</i>           | -1,16 | 1,62E-01 | 4,14E-01 |

|                        |       |          |          |
|------------------------|-------|----------|----------|
| <i>ENST00000376209</i> | -1,08 | 1,62E-01 | 4,14E-01 |
| <i>TMEM118</i>         | 1,08  | 1,62E-01 | 4,14E-01 |
| <i>RBM3</i>            | 1,12  | 1,62E-01 | 4,14E-01 |
| <i>CR624517</i>        | -1,10 | 1,62E-01 | 4,14E-01 |
| <i>ASB6</i>            | -1,03 | 1,62E-01 | 4,14E-01 |
| <i>FCN1</i>            | -1,21 | 1,62E-01 | 4,15E-01 |
| <i>AB096249</i>        | -1,08 | 1,62E-01 | 4,15E-01 |
| <i>COQ4</i>            | -1,07 | 1,62E-01 | 4,15E-01 |
| <i>FBXW5</i>           | 1,08  | 1,62E-01 | 4,15E-01 |
| <i>TREX2</i>           | 1,04  | 1,62E-01 | 4,15E-01 |
| <i>NLF1</i>            | 1,07  | 1,62E-01 | 4,15E-01 |
| <i>THC2295313</i>      | -1,05 | 1,62E-01 | 4,15E-01 |
| <i>VAMP8</i>           | -1,12 | 1,62E-01 | 4,15E-01 |
| <i>AF131788</i>        | -1,05 | 1,62E-01 | 4,15E-01 |
| <i>TCF8</i>            | 1,08  | 1,63E-01 | 4,15E-01 |
| <i>C7orf31</i>         | -1,08 | 1,63E-01 | 4,15E-01 |
| <i>C10orf39</i>        | 1,14  | 1,63E-01 | 4,16E-01 |
| <i>SLC39A3</i>         | 1,06  | 1,63E-01 | 4,16E-01 |
| <i>THC2402147</i>      | -1,05 | 1,63E-01 | 4,16E-01 |
| <i>CR593166</i>        | -1,08 | 1,63E-01 | 4,16E-01 |
| <i>THC2456973</i>      | -1,06 | 1,63E-01 | 4,16E-01 |
| <i>AA425812</i>        | -1,05 | 1,63E-01 | 4,16E-01 |
| <i>ENST00000331419</i> | 1,05  | 1,63E-01 | 4,16E-01 |
| <i>PRAM1</i>           | -1,05 | 1,63E-01 | 4,16E-01 |
| <i>RP11-114G1.1</i>    | 1,12  | 1,63E-01 | 4,16E-01 |
| <i>HLF</i>             | -1,16 | 1,63E-01 | 4,16E-01 |
| <i>THC2339241</i>      | -1,07 | 1,63E-01 | 4,16E-01 |
| <i>THC2375853</i>      | 1,06  | 1,63E-01 | 4,16E-01 |
| <i>ARHGEF4</i>         | -1,12 | 1,63E-01 | 4,16E-01 |
| <i>AF090926</i>        | -1,08 | 1,63E-01 | 4,16E-01 |
| <i>GABRQ</i>           | -1,07 | 1,63E-01 | 4,16E-01 |
| <i>PFDN2</i>           | 1,06  | 1,63E-01 | 4,16E-01 |
| <i>FLJ13224</i>        | 1,06  | 1,63E-01 | 4,16E-01 |
| <i>TNS4</i>            | 1,32  | 1,63E-01 | 4,16E-01 |
| <i>THC2310236</i>      | 1,04  | 1,63E-01 | 4,16E-01 |
| <i>NUP88</i>           | 1,05  | 1,63E-01 | 4,16E-01 |
| <i>BC047589</i>        | 1,06  | 1,63E-01 | 4,16E-01 |
| <i>F11</i>             | -1,06 | 1,63E-01 | 4,16E-01 |
| <i>SV2B</i>            | 1,15  | 1,63E-01 | 4,16E-01 |
| <i>MLZE</i>            | 1,08  | 1,63E-01 | 4,16E-01 |
| <i>LOC441876</i>       | 1,07  | 1,63E-01 | 4,16E-01 |
| <i>TRIM73</i>          | -1,09 | 1,63E-01 | 4,17E-01 |
| <i>WBSCR22</i>         | 1,05  | 1,63E-01 | 4,17E-01 |
| <i>PHF23</i>           | -1,06 | 1,63E-01 | 4,17E-01 |

|                 |       |          |          |
|-----------------|-------|----------|----------|
| VCAM1           | 1,14  | 1,63E-01 | 4,17E-01 |
| VENTXP1         | -1,05 | 1,63E-01 | 4,17E-01 |
| ENST00000368804 | 1,09  | 1,63E-01 | 4,17E-01 |
| PFKFB1          | 1,05  | 1,63E-01 | 4,17E-01 |
| A_32_P202273    | -1,06 | 1,64E-01 | 4,17E-01 |
| C19orf42        | -1,05 | 1,64E-01 | 4,17E-01 |
| FLJ31196        | -1,14 | 1,64E-01 | 4,17E-01 |
| LOC644117       | 1,06  | 1,64E-01 | 4,17E-01 |
| HPX-2           | 1,06  | 1,64E-01 | 4,17E-01 |
| CACNA1E         | 1,10  | 1,64E-01 | 4,17E-01 |
| THC2386194      | -1,10 | 1,64E-01 | 4,17E-01 |
| BC062753        | -1,08 | 1,64E-01 | 4,17E-01 |
| CD671824        | 1,07  | 1,64E-01 | 4,17E-01 |
| ENST00000324559 | 1,20  | 1,64E-01 | 4,17E-01 |
| AK024680        | -1,30 | 1,64E-01 | 4,17E-01 |
| ENST00000333462 | 1,06  | 1,64E-01 | 4,17E-01 |
| THC2442063      | 1,08  | 1,64E-01 | 4,17E-01 |
| A_24_P921719    | 1,05  | 1,64E-01 | 4,17E-01 |
| COIL            | -1,05 | 1,64E-01 | 4,17E-01 |
| A_24_P689119    | 1,18  | 1,64E-01 | 4,17E-01 |
| A_24_P839258    | -1,11 | 1,64E-01 | 4,18E-01 |
| MAPKAPK5        | 1,06  | 1,64E-01 | 4,18E-01 |
| MGC11257        | 1,06  | 1,64E-01 | 4,18E-01 |
| A_24_P934541    | -1,05 | 1,64E-01 | 4,18E-01 |
| ENST00000360796 | 1,06  | 1,64E-01 | 4,18E-01 |
| FLJ40092        | -1,05 | 1,64E-01 | 4,18E-01 |
| UTP6            | -1,05 | 1,64E-01 | 4,18E-01 |
| BX111600        | -1,08 | 1,64E-01 | 4,18E-01 |
| CRTC1           | 1,05  | 1,64E-01 | 4,18E-01 |
| MPV17L          | -1,08 | 1,64E-01 | 4,18E-01 |
| THC2436962      | -1,07 | 1,64E-01 | 4,18E-01 |
| OR10P1          | 1,06  | 1,65E-01 | 4,19E-01 |
| A_24_P127362    | -1,05 | 1,65E-01 | 4,19E-01 |
| PIK3C2A         | 1,05  | 1,65E-01 | 4,19E-01 |
| THC2312637      | 1,13  | 1,65E-01 | 4,19E-01 |
| THC2303175      | -1,09 | 1,65E-01 | 4,19E-01 |
| CD302           | -1,09 | 1,65E-01 | 4,19E-01 |
| BC038431        | -1,09 | 1,65E-01 | 4,19E-01 |
| KCNJ12          | -1,08 | 1,65E-01 | 4,19E-01 |
| RBBP7           | -1,08 | 1,65E-01 | 4,19E-01 |
| AK092888        | -1,06 | 1,65E-01 | 4,19E-01 |
| AMZ2            | -1,06 | 1,65E-01 | 4,19E-01 |
| ENST00000355898 | -1,04 | 1,65E-01 | 4,19E-01 |
| THC2371517      | 1,05  | 1,65E-01 | 4,19E-01 |

|                        |       |          |          |
|------------------------|-------|----------|----------|
| <i>HSU79275</i>        | 1,07  | 1,65E-01 | 4,19E-01 |
| <i>A_24_P591119</i>    | 1,08  | 1,65E-01 | 4,19E-01 |
| <i>ENST00000272235</i> | 1,09  | 1,65E-01 | 4,19E-01 |
| <i>G31710</i>          | 1,07  | 1,65E-01 | 4,19E-01 |
| <i>KIF26A</i>          | 1,13  | 1,65E-01 | 4,19E-01 |
| <i>THC2438994</i>      | -1,07 | 1,65E-01 | 4,19E-01 |
| <i>ENST00000368491</i> | 1,05  | 1,65E-01 | 4,19E-01 |
| <i>A_24_P324488</i>    | 1,07  | 1,65E-01 | 4,19E-01 |
| <i>HYAL2</i>           | 1,09  | 1,65E-01 | 4,19E-01 |
| <i>A_24_P911766</i>    | 1,04  | 1,65E-01 | 4,19E-01 |
| <i>USP46</i>           | 1,08  | 1,65E-01 | 4,19E-01 |
| <i>PARP4</i>           | -1,06 | 1,65E-01 | 4,19E-01 |
| <i>PHF6</i>            | -1,05 | 1,65E-01 | 4,19E-01 |
| <i>ENST00000316497</i> | 1,06  | 1,65E-01 | 4,19E-01 |
| <i>A_32_P77759</i>     | 1,10  | 1,65E-01 | 4,19E-01 |
| <i>RFPL1S</i>          | -1,05 | 1,65E-01 | 4,19E-01 |
| <i>AW168154</i>        | -1,06 | 1,65E-01 | 4,20E-01 |
| <i>PRND</i>            | 1,07  | 1,65E-01 | 4,20E-01 |
| <i>THC2301901</i>      | -1,13 | 1,65E-01 | 4,20E-01 |
| <i>MMP1</i>            | 1,14  | 1,65E-01 | 4,20E-01 |
| <i>SPON2</i>           | -1,10 | 1,66E-01 | 4,20E-01 |
| <i>ATF2</i>            | -1,06 | 1,66E-01 | 4,20E-01 |
| <i>LOC388969</i>       | -1,04 | 1,66E-01 | 4,20E-01 |
| <i>AA400465</i>        | -1,07 | 1,66E-01 | 4,20E-01 |
| <i>A_32_P9924</i>      | -1,11 | 1,66E-01 | 4,20E-01 |
| <i>KCNE1L</i>          | -1,07 | 1,66E-01 | 4,20E-01 |
| <i>CEP192</i>          | -1,06 | 1,66E-01 | 4,20E-01 |
| <i>NCBP1</i>           | -1,06 | 1,66E-01 | 4,20E-01 |
| <i>MITD1</i>           | -1,05 | 1,66E-01 | 4,20E-01 |
| <i>SAPS3</i>           | 1,04  | 1,66E-01 | 4,20E-01 |
| <i>ADCY9</i>           | 1,07  | 1,66E-01 | 4,20E-01 |
| <i>YAP1</i>            | 1,10  | 1,66E-01 | 4,20E-01 |
| <i>KCTD15</i>          | -1,06 | 1,66E-01 | 4,20E-01 |
| <i>A_24_P632160</i>    | 1,05  | 1,66E-01 | 4,20E-01 |
| <i>RNF123</i>          | 1,06  | 1,66E-01 | 4,20E-01 |
| <i>A_24_P324588</i>    | -1,05 | 1,66E-01 | 4,21E-01 |
| <i>PTPN2</i>           | -1,04 | 1,66E-01 | 4,21E-01 |
| <i>THC2307989</i>      | 1,06  | 1,66E-01 | 4,21E-01 |
| <i>STK32A</i>          | 1,10  | 1,66E-01 | 4,21E-01 |
| <i>STIL</i>            | -1,05 | 1,66E-01 | 4,21E-01 |
| <i>NPAL2</i>           | -1,07 | 1,66E-01 | 4,21E-01 |
| <i>PPT2</i>            | 1,06  | 1,66E-01 | 4,21E-01 |
| <i>AXL</i>             | 1,08  | 1,66E-01 | 4,21E-01 |
| <i>KIAA1344</i>        | -1,11 | 1,66E-01 | 4,21E-01 |



|                        |       |          |          |
|------------------------|-------|----------|----------|
| <i>BC018885</i>        | -1,05 | 1,66E-01 | 4,21E-01 |
| <i>ASPA</i>            | -1,10 | 1,66E-01 | 4,21E-01 |
| <i>TRPC2</i>           | 1,05  | 1,66E-01 | 4,21E-01 |
| <i>TPSD1</i>           | -1,18 | 1,67E-01 | 4,21E-01 |
| <i>HSPC049</i>         | -1,08 | 1,67E-01 | 4,21E-01 |
| <i>THC2388163</i>      | -1,05 | 1,67E-01 | 4,21E-01 |
| <i>ENST00000283243</i> | -1,11 | 1,67E-01 | 4,22E-01 |
| <i>FCRL5</i>           | -1,13 | 1,67E-01 | 4,22E-01 |
| <i>A_24_P524519</i>    | -1,08 | 1,67E-01 | 4,22E-01 |
| <i>A_24_P670475</i>    | -1,06 | 1,67E-01 | 4,22E-01 |
| <i>CCAR1</i>           | -1,06 | 1,67E-01 | 4,22E-01 |
| <i>FAM40A</i>          | -1,05 | 1,67E-01 | 4,22E-01 |
| <i>UBL5</i>            | 1,04  | 1,67E-01 | 4,22E-01 |
| <i>AF035027</i>        | 1,06  | 1,67E-01 | 4,22E-01 |
| <i>THC2443291</i>      | 1,07  | 1,67E-01 | 4,22E-01 |
| <i>TLE3</i>            | 1,07  | 1,67E-01 | 4,22E-01 |
| <i>DOCK9</i>           | 1,08  | 1,67E-01 | 4,22E-01 |
| <i>DSC1</i>            | 1,08  | 1,67E-01 | 4,22E-01 |
| <i>AI241366</i>        | 1,08  | 1,67E-01 | 4,22E-01 |
| <i>A_24_P417209</i>    | -1,05 | 1,67E-01 | 4,22E-01 |
| <i>ADA</i>             | -1,14 | 1,67E-01 | 4,22E-01 |
| <i>ENST00000282366</i> | -1,10 | 1,67E-01 | 4,22E-01 |
| <i>A_24_P918677</i>    | -1,10 | 1,67E-01 | 4,22E-01 |
| <i>ZNF404</i>          | -1,09 | 1,67E-01 | 4,22E-01 |
| <i>LOC126536</i>       | -1,06 | 1,67E-01 | 4,22E-01 |
| <i>GPR141</i>          | -1,05 | 1,67E-01 | 4,22E-01 |
| <i>MGC4294</i>         | -1,05 | 1,67E-01 | 4,22E-01 |
| <i>OSBPL2</i>          | -1,04 | 1,67E-01 | 4,22E-01 |
| <i>A_32_P209250</i>    | 1,04  | 1,67E-01 | 4,22E-01 |
| <i>A_24_P24982</i>     | 1,04  | 1,67E-01 | 4,22E-01 |
| <i>GRIN3B</i>          | 1,05  | 1,67E-01 | 4,22E-01 |
| <i>BF326020</i>        | 1,05  | 1,67E-01 | 4,22E-01 |
| <i>DKFZP434I0714</i>   | 1,06  | 1,67E-01 | 4,22E-01 |
| <i>LMAN1L</i>          | 1,06  | 1,67E-01 | 4,22E-01 |
| <i>UHRF1</i>           | 1,06  | 1,67E-01 | 4,22E-01 |
| <i>ENST00000321214</i> | 1,07  | 1,67E-01 | 4,22E-01 |
| <i>DGKD</i>            | 1,08  | 1,67E-01 | 4,22E-01 |
| <i>A_24_P15610</i>     | 1,12  | 1,67E-01 | 4,22E-01 |
| <i>A_24_P853410</i>    | 1,12  | 1,67E-01 | 4,22E-01 |
| <i>MYOM1</i>           | 1,15  | 1,67E-01 | 4,22E-01 |
| <i>GPC3</i>            | 1,16  | 1,67E-01 | 4,22E-01 |
| <i>C20orf103</i>       | 1,29  | 1,67E-01 | 4,22E-01 |
| <i>ZNF683</i>          | -1,11 | 1,67E-01 | 4,22E-01 |
| <i>PCGF6</i>           | -1,07 | 1,67E-01 | 4,22E-01 |

|                        |       |          |          |
|------------------------|-------|----------|----------|
| <i>MGC3032</i>         | -1,06 | 1,67E-01 | 4,22E-01 |
| <i>TMBIM1</i>          | 1,06  | 1,67E-01 | 4,22E-01 |
| <i>THC2270724</i>      | -1,15 | 1,67E-01 | 4,22E-01 |
| <i>A_24_P928006</i>    | 1,05  | 1,67E-01 | 4,22E-01 |
| <i>SCFD1</i>           | -1,07 | 1,68E-01 | 4,22E-01 |
| <i>A_24_P367259</i>    | 1,05  | 1,68E-01 | 4,22E-01 |
| <i>THC2315497</i>      | -1,04 | 1,68E-01 | 4,23E-01 |
| <i>CUL4B</i>           | -1,04 | 1,68E-01 | 4,23E-01 |
| <i>ASL</i>             | 1,06  | 1,68E-01 | 4,23E-01 |
| <i>AJ710526</i>        | 1,20  | 1,68E-01 | 4,23E-01 |
| <i>FLJ25439</i>        | 1,04  | 1,68E-01 | 4,23E-01 |
| <i>THC2408737</i>      | -1,07 | 1,68E-01 | 4,23E-01 |
| <i>A_24_P859431</i>    | 1,05  | 1,68E-01 | 4,23E-01 |
| <i>APBA1</i>           | -1,08 | 1,68E-01 | 4,23E-01 |
| <i>C10orf46</i>        | -1,06 | 1,68E-01 | 4,23E-01 |
| <i>RNF133</i>          | 1,06  | 1,68E-01 | 4,23E-01 |
| <i>EBAG9</i>           | 1,06  | 1,68E-01 | 4,23E-01 |
| <i>PSG6</i>            | 1,06  | 1,68E-01 | 4,23E-01 |
| <i>THC2403178</i>      | -1,07 | 1,68E-01 | 4,23E-01 |
| <i>ENST00000308604</i> | 1,11  | 1,68E-01 | 4,23E-01 |
| <i>CA314185</i>        | -1,20 | 1,68E-01 | 4,23E-01 |
| <i>ADCY3</i>           | -1,05 | 1,68E-01 | 4,23E-01 |
| <i>CHD9</i>            | -1,05 | 1,68E-01 | 4,23E-01 |
| <i>TSHR</i>            | -1,04 | 1,68E-01 | 4,23E-01 |
| <i>BG623116</i>        | 1,08  | 1,68E-01 | 4,23E-01 |
| <i>A_24_P927588</i>    | -1,06 | 1,68E-01 | 4,23E-01 |
| <i>PRKRIP1</i>         | -1,04 | 1,68E-01 | 4,23E-01 |
| <i>THC2413224</i>      | -1,11 | 1,68E-01 | 4,24E-01 |
| <i>AK026497</i>        | -1,06 | 1,68E-01 | 4,24E-01 |
| <i>ENST00000341287</i> | 1,05  | 1,68E-01 | 4,24E-01 |
| <i>C16orf76</i>        | 1,08  | 1,68E-01 | 4,24E-01 |
| <i>CR749708</i>        | 1,06  | 1,68E-01 | 4,24E-01 |
| <i>THC2386398</i>      | 1,06  | 1,68E-01 | 4,24E-01 |
| <i>COG1</i>            | -1,05 | 1,69E-01 | 4,24E-01 |
| <i>HMGCR</i>           | -1,09 | 1,69E-01 | 4,24E-01 |
| <i>A2ML1</i>           | 1,15  | 1,69E-01 | 4,24E-01 |
| <i>OSM</i>             | 1,33  | 1,69E-01 | 4,24E-01 |
| <i>TXNL6</i>           | 1,05  | 1,69E-01 | 4,24E-01 |
| <i>KIAA0460</i>        | -1,06 | 1,69E-01 | 4,24E-01 |
| <i>38777</i>           | -1,06 | 1,69E-01 | 4,24E-01 |
| <i>HRAS</i>            | 1,06  | 1,69E-01 | 4,24E-01 |
| <i>OR5F1</i>           | 1,05  | 1,69E-01 | 4,24E-01 |
| <i>GYS1</i>            | 1,07  | 1,69E-01 | 4,24E-01 |
| <i>ENST00000355049</i> | 1,05  | 1,69E-01 | 4,25E-01 |

|                     |       |          |          |
|---------------------|-------|----------|----------|
| <i>DLG3</i>         | 1,06  | 1,69E-01 | 4,25E-01 |
| <i>LOC339745</i>    | 1,07  | 1,69E-01 | 4,25E-01 |
| <i>CTSC</i>         | -1,08 | 1,69E-01 | 4,25E-01 |
| <i>THC2343415</i>   | 1,05  | 1,69E-01 | 4,25E-01 |
| <i>CCDC11</i>       | -1,05 | 1,69E-01 | 4,25E-01 |
| <i>BM668321</i>     | -1,05 | 1,69E-01 | 4,25E-01 |
| <i>BX118699</i>     | 1,23  | 1,69E-01 | 4,25E-01 |
| <i>THC2282018</i>   | 1,12  | 1,69E-01 | 4,25E-01 |
| <i>CLEC10A</i>      | -1,14 | 1,69E-01 | 4,25E-01 |
| <i>AK022150</i>     | -1,12 | 1,69E-01 | 4,25E-01 |
| <i>THC2268988</i>   | -1,04 | 1,69E-01 | 4,25E-01 |
| <i>HERC5</i>        | -1,09 | 1,69E-01 | 4,25E-01 |
| <i>A_24_P221475</i> | 1,06  | 1,69E-01 | 4,25E-01 |
| <i>ZADH1</i>        | -1,08 | 1,69E-01 | 4,25E-01 |
| <i>SLC5A1</i>       | -1,13 | 1,70E-01 | 4,25E-01 |
| <i>A_24_P50328</i>  | -1,05 | 1,69E-01 | 4,25E-01 |
| <i>LTV1</i>         | -1,05 | 1,69E-01 | 4,25E-01 |
| <i>NUP214</i>       | 1,04  | 1,70E-01 | 4,25E-01 |
| <i>CRSP8</i>        | 1,05  | 1,69E-01 | 4,25E-01 |
| <i>CYP21A2</i>      | 1,08  | 1,70E-01 | 4,25E-01 |
| <i>MRPS2</i>        | -1,05 | 1,70E-01 | 4,25E-01 |
| <i>THC2284157</i>   | 1,06  | 1,70E-01 | 4,26E-01 |
| <i>THC2287590</i>   | 1,05  | 1,70E-01 | 4,26E-01 |
| <i>TAS2R50</i>      | 1,05  | 1,70E-01 | 4,26E-01 |
| <i>RPS27</i>        | -1,07 | 1,70E-01 | 4,26E-01 |
| <i>C1orf164</i>     | -1,06 | 1,70E-01 | 4,26E-01 |
| <i>C11orf49</i>     | -1,06 | 1,70E-01 | 4,26E-01 |
| <i>C3orf62</i>      | -1,04 | 1,70E-01 | 4,26E-01 |
| <i>PLCH1</i>        | 1,04  | 1,70E-01 | 4,26E-01 |
| <i>ST14</i>         | 1,06  | 1,70E-01 | 4,26E-01 |
| <i>LOC644357</i>    | 1,05  | 1,70E-01 | 4,26E-01 |
| <i>C14orf135</i>    | -1,05 | 1,70E-01 | 4,26E-01 |
| <i>AA782850</i>     | -1,05 | 1,70E-01 | 4,26E-01 |
| <i>AY010112</i>     | 1,05  | 1,70E-01 | 4,26E-01 |
| <i>A_23_P28743</i>  | -1,05 | 1,70E-01 | 4,26E-01 |
| <i>AF086547</i>     | -1,15 | 1,70E-01 | 4,26E-01 |
| <i>FLJ35409</i>     | 1,05  | 1,70E-01 | 4,26E-01 |
| <i>AK098749</i>     | 1,06  | 1,70E-01 | 4,26E-01 |
| <i>AKT1</i>         | 1,07  | 1,70E-01 | 4,26E-01 |
| <i>PON3</i>         | -1,12 | 1,70E-01 | 4,26E-01 |
| <i>BM981574</i>     | -1,07 | 1,70E-01 | 4,26E-01 |
| <i>ASPHD2</i>       | -1,05 | 1,70E-01 | 4,26E-01 |
| <i>BC107568</i>     | -1,12 | 1,70E-01 | 4,27E-01 |
| <i>A_24_P839075</i> | -1,07 | 1,70E-01 | 4,27E-01 |

|                        |       |          |          |
|------------------------|-------|----------|----------|
| <i>N59744</i>          | 1,04  | 1,70E-01 | 4,27E-01 |
| <i>A_24_P911712</i>    | 1,18  | 1,70E-01 | 4,27E-01 |
| <i>PNMA5</i>           | -1,13 | 1,71E-01 | 4,27E-01 |
| <i>BC015370</i>        | -1,10 | 1,71E-01 | 4,27E-01 |
| <i>THC2378061</i>      | -1,05 | 1,71E-01 | 4,27E-01 |
| <i>BI825566</i>        | 1,05  | 1,71E-01 | 4,27E-01 |
| <i>BQ233242</i>        | -1,07 | 1,71E-01 | 4,27E-01 |
| <i>ALDOB</i>           | 1,05  | 1,71E-01 | 4,27E-01 |
| <i>A_32_P140501</i>    | -1,09 | 1,71E-01 | 4,27E-01 |
| <i>RP11-308D16.4</i>   | -1,06 | 1,71E-01 | 4,27E-01 |
| <i>KIAA1429</i>        | -1,06 | 1,71E-01 | 4,27E-01 |
| <i>A_24_P229304</i>    | 1,05  | 1,71E-01 | 4,27E-01 |
| <i>SEZ6L2</i>          | -1,19 | 1,71E-01 | 4,27E-01 |
| <i>DDX19-DDX19L</i>    | 1,07  | 1,71E-01 | 4,27E-01 |
| <i>AF070620</i>        | -1,06 | 1,71E-01 | 4,28E-01 |
| <i>THC2344152</i>      | -1,12 | 1,71E-01 | 4,28E-01 |
| <i>A_24_P367139</i>    | -1,05 | 1,71E-01 | 4,28E-01 |
| <i>IQCB1</i>           | -1,05 | 1,71E-01 | 4,28E-01 |
| <i>ANKRD41</i>         | 1,05  | 1,71E-01 | 4,28E-01 |
| <i>AI280298</i>        | -1,06 | 1,71E-01 | 4,28E-01 |
| <i>A_24_P937952</i>    | 1,06  | 1,71E-01 | 4,28E-01 |
| <i>C12orf22</i>        | -1,05 | 1,71E-01 | 4,28E-01 |
| <i>AA532655</i>        | 1,11  | 1,71E-01 | 4,28E-01 |
| <i>ACTR3</i>           | 1,07  | 1,71E-01 | 4,28E-01 |
| <i>AY043127</i>        | 1,05  | 1,71E-01 | 4,28E-01 |
| <i>HTATSF1</i>         | -1,07 | 1,71E-01 | 4,28E-01 |
| <i>PLS3</i>            | -1,09 | 1,71E-01 | 4,28E-01 |
| <i>BF754999</i>        | -1,05 | 1,71E-01 | 4,28E-01 |
| <i>CR622189</i>        | -1,17 | 1,72E-01 | 4,29E-01 |
| <i>SARDH</i>           | -1,30 | 1,72E-01 | 4,29E-01 |
| <i>ENST00000377548</i> | -1,15 | 1,72E-01 | 4,29E-01 |
| <i>AY358148</i>        | -1,06 | 1,72E-01 | 4,29E-01 |
| <i>HTRA2</i>           | 1,05  | 1,72E-01 | 4,29E-01 |
| <i>A_23_P45712</i>     | 1,05  | 1,72E-01 | 4,29E-01 |
| <i>SCRN3</i>           | 1,05  | 1,72E-01 | 4,29E-01 |
| <i>K03200</i>          | -1,13 | 1,72E-01 | 4,29E-01 |
| <i>RFX3</i>            | 1,04  | 1,72E-01 | 4,29E-01 |
| <i>RPRML</i>           | 1,09  | 1,72E-01 | 4,29E-01 |
| <i>XAGE1</i>           | 1,23  | 1,72E-01 | 4,29E-01 |
| <i>ENST00000373547</i> | -1,06 | 1,72E-01 | 4,29E-01 |
| <i>FLJ20464</i>        | -1,04 | 1,72E-01 | 4,29E-01 |
| <i>BDNF</i>            | 1,16  | 1,72E-01 | 4,29E-01 |
| <i>CA10</i>            | -1,10 | 1,72E-01 | 4,29E-01 |
| <i>NP214448</i>        | -1,05 | 1,72E-01 | 4,29E-01 |

|                     |       |          |          |
|---------------------|-------|----------|----------|
| <i>TCF7L1</i>       | 1,06  | 1,72E-01 | 4,29E-01 |
| <i>PSEN2</i>        | 1,08  | 1,72E-01 | 4,29E-01 |
| <i>LRRRC17</i>      | 1,20  | 1,72E-01 | 4,29E-01 |
| <i>THC2379706</i>   | 1,05  | 1,72E-01 | 4,29E-01 |
| <i>A_24_P367326</i> | 1,20  | 1,72E-01 | 4,29E-01 |
| <i>SLC5A4</i>       | -1,09 | 1,72E-01 | 4,29E-01 |
| <i>SLC22A18</i>     | -1,07 | 1,72E-01 | 4,29E-01 |
| <i>SPHK2</i>        | -1,05 | 1,72E-01 | 4,29E-01 |
| <i>TMEM76</i>       | -1,04 | 1,72E-01 | 4,29E-01 |
| <i>PROKR2</i>       | 1,05  | 1,72E-01 | 4,29E-01 |
| <i>FLJ23865</i>     | 1,05  | 1,72E-01 | 4,29E-01 |
| <i>PMP22</i>        | 1,08  | 1,72E-01 | 4,29E-01 |
| <i>TFE3</i>         | 1,05  | 1,72E-01 | 4,29E-01 |
| <i>WDFY2</i>        | -1,06 | 1,72E-01 | 4,29E-01 |
| <i>LOC285148</i>    | 1,03  | 1,72E-01 | 4,30E-01 |
| <i>RDH14</i>        | -1,07 | 1,72E-01 | 4,30E-01 |
| <i>A_24_P916979</i> | 1,06  | 1,72E-01 | 4,30E-01 |
| <i>ZNF185</i>       | -1,28 | 1,72E-01 | 4,30E-01 |
| <i>B3GNT6</i>       | 1,04  | 1,72E-01 | 4,30E-01 |
| <i>FAM100B</i>      | 1,08  | 1,72E-01 | 4,30E-01 |
| <i>SLC38A6</i>      | -1,05 | 1,73E-01 | 4,30E-01 |
| <i>LOC90321</i>     | -1,08 | 1,73E-01 | 4,30E-01 |
| <i>MAGEB2</i>       | 1,05  | 1,73E-01 | 4,30E-01 |
| <i>AK097130</i>     | 1,10  | 1,73E-01 | 4,30E-01 |
| <i>DES</i>          | 1,37  | 1,73E-01 | 4,30E-01 |
| <i>AK091357</i>     | -1,06 | 1,73E-01 | 4,30E-01 |
| <i>THC2343649</i>   | 1,04  | 1,73E-01 | 4,30E-01 |
| <i>MASTL</i>        | 1,06  | 1,73E-01 | 4,30E-01 |
| <i>RANBP17</i>      | -1,07 | 1,73E-01 | 4,30E-01 |
| <i>GPR34</i>        | -1,17 | 1,73E-01 | 4,30E-01 |
| <i>EMP2</i>         | 1,08  | 1,73E-01 | 4,30E-01 |
| <i>LUC7L2</i>       | -1,05 | 1,73E-01 | 4,30E-01 |
| <i>CPA4</i>         | 1,06  | 1,73E-01 | 4,30E-01 |
| <i>BC064139</i>     | -1,09 | 1,73E-01 | 4,30E-01 |
| <i>PRR12</i>        | -1,05 | 1,73E-01 | 4,30E-01 |
| <i>AK097222</i>     | -1,08 | 1,73E-01 | 4,30E-01 |
| <i>MYD88</i>        | -1,04 | 1,73E-01 | 4,30E-01 |
| <i>A_32_P128603</i> | -1,10 | 1,73E-01 | 4,30E-01 |
| <i>ST6GALNAC2</i>   | 1,11  | 1,73E-01 | 4,30E-01 |
| <i>P2RX1</i>        | 1,37  | 1,73E-01 | 4,30E-01 |
| <i>SRPR</i>         | -1,07 | 1,73E-01 | 4,31E-01 |
| <i>LOC401398</i>    | 1,05  | 1,73E-01 | 4,31E-01 |
| <i>LIN7B</i>        | 1,07  | 1,73E-01 | 4,31E-01 |
| <i>P2RY13</i>       | -1,10 | 1,73E-01 | 4,31E-01 |

|                        |       |          |          |
|------------------------|-------|----------|----------|
| <i>RP1</i>             | -1,06 | 1,73E-01 | 4,31E-01 |
| <i>BARHL2</i>          | -1,05 | 1,73E-01 | 4,31E-01 |
| <i>EIF2B1</i>          | -1,05 | 1,73E-01 | 4,31E-01 |
| <i>PSPC1</i>           | 1,07  | 1,73E-01 | 4,31E-01 |
| <i>ERCC5</i>           | -1,07 | 1,73E-01 | 4,31E-01 |
| <i>AK023400</i>        | -1,07 | 1,73E-01 | 4,31E-01 |
| <i>PCDHGA12</i>        | -1,06 | 1,73E-01 | 4,31E-01 |
| <i>CR598940</i>        | 1,05  | 1,73E-01 | 4,31E-01 |
| <i>PCBP4</i>           | 1,05  | 1,73E-01 | 4,31E-01 |
| <i>IGFBP1</i>          | 1,08  | 1,73E-01 | 4,31E-01 |
| <i>THC2369595</i>      | 1,13  | 1,73E-01 | 4,31E-01 |
| <i>DNAJC9</i>          | -1,06 | 1,73E-01 | 4,31E-01 |
| <i>THC2282342</i>      | -1,05 | 1,74E-01 | 4,31E-01 |
| <i>ENST00000260257</i> | -1,04 | 1,74E-01 | 4,31E-01 |
| <i>RCSD1</i>           | 1,09  | 1,74E-01 | 4,31E-01 |
| <i>EPB41L1</i>         | -1,09 | 1,74E-01 | 4,31E-01 |
| <i>BLNK</i>            | -1,09 | 1,74E-01 | 4,31E-01 |
| <i>SND1</i>            | -1,08 | 1,74E-01 | 4,31E-01 |
| <i>A_24_P348428</i>    | -1,04 | 1,74E-01 | 4,31E-01 |
| <i>BC038559</i>        | 1,05  | 1,74E-01 | 4,31E-01 |
| <i>LOC647090</i>       | 1,09  | 1,74E-01 | 4,31E-01 |
| <i>JAG1</i>            | 1,10  | 1,74E-01 | 4,31E-01 |
| <i>PROM2</i>           | -1,08 | 1,74E-01 | 4,32E-01 |
| <i>AI186481</i>        | -1,06 | 1,74E-01 | 4,32E-01 |
| <i>GAN</i>             | 1,04  | 1,74E-01 | 4,32E-01 |
| <i>THC2268548</i>      | 1,05  | 1,74E-01 | 4,32E-01 |
| <i>C9orf126</i>        | 1,06  | 1,74E-01 | 4,32E-01 |
| <i>TAAR6</i>           | 1,07  | 1,74E-01 | 4,32E-01 |
| <i>COX8A</i>           | 1,07  | 1,74E-01 | 4,32E-01 |
| <i>AGXT2L1</i>         | 1,20  | 1,74E-01 | 4,32E-01 |
| <i>OSTbeta</i>         | 1,26  | 1,74E-01 | 4,32E-01 |
| <i>OR1S2</i>           | 1,04  | 1,74E-01 | 4,32E-01 |
| <i>CLEC2B</i>          | 1,12  | 1,74E-01 | 4,32E-01 |
| <i>MBIP</i>            | -1,07 | 1,74E-01 | 4,32E-01 |
| <i>ENST00000337530</i> | -1,14 | 1,74E-01 | 4,32E-01 |
| <i>ACN9</i>            | -1,07 | 1,74E-01 | 4,32E-01 |
| <i>NP111770</i>        | 1,04  | 1,74E-01 | 4,32E-01 |
| <i>MYO7B</i>           | 1,05  | 1,74E-01 | 4,32E-01 |
| <i>MEIS3P1</i>         | 1,07  | 1,74E-01 | 4,32E-01 |
| <i>MLL5</i>            | 1,08  | 1,74E-01 | 4,32E-01 |
| <i>ENTPD4</i>          | 1,09  | 1,74E-01 | 4,32E-01 |
| <i>PTAFR</i>           | 1,14  | 1,74E-01 | 4,32E-01 |
| <i>C14orf45</i>        | -1,08 | 1,74E-01 | 4,32E-01 |
| <i>TP53</i>            | -1,06 | 1,74E-01 | 4,32E-01 |

|                        |       |          |          |
|------------------------|-------|----------|----------|
| <i>TMEM71</i>          | 1,11  | 1,74E-01 | 4,32E-01 |
| <i>CYBB</i>            | -1,09 | 1,74E-01 | 4,32E-01 |
| <i>WASF2</i>           | 1,07  | 1,74E-01 | 4,32E-01 |
| <i>CADPS</i>           | -1,15 | 1,74E-01 | 4,32E-01 |
| <i>AJ420450</i>        | -1,06 | 1,75E-01 | 4,32E-01 |
| <i>ARL8B</i>           | 1,04  | 1,75E-01 | 4,32E-01 |
| <i>A_24_P918367</i>    | -1,12 | 1,75E-01 | 4,32E-01 |
| <i>ENST00000369397</i> | -1,08 | 1,75E-01 | 4,32E-01 |
| <i>A_24_P692600</i>    | -1,05 | 1,75E-01 | 4,33E-01 |
| <i>SPOCK1</i>          | -1,14 | 1,75E-01 | 4,33E-01 |
| <i>CD300452</i>        | -1,05 | 1,75E-01 | 4,33E-01 |
| <i>AA563626</i>        | -1,06 | 1,75E-01 | 4,33E-01 |
| <i>SLC29A3</i>         | -1,06 | 1,75E-01 | 4,33E-01 |
| <i>SCOC</i>            | 1,05  | 1,75E-01 | 4,33E-01 |
| <i>PAX6</i>            | 1,10  | 1,75E-01 | 4,33E-01 |
| <i>CLIC3</i>           | -1,23 | 1,75E-01 | 4,33E-01 |
| <i>BX537520</i>        | -1,05 | 1,75E-01 | 4,33E-01 |
| <i>C19orf6</i>         | -1,04 | 1,75E-01 | 4,33E-01 |
| <i>ENST00000334683</i> | -1,05 | 1,75E-01 | 4,33E-01 |
| <i>FLJ40330</i>        | -1,06 | 1,75E-01 | 4,33E-01 |
| <i>PTMS</i>            | 1,05  | 1,75E-01 | 4,33E-01 |
| <i>THC2413386</i>      | 1,04  | 1,75E-01 | 4,33E-01 |
| <i>AK027082</i>        | 1,05  | 1,75E-01 | 4,33E-01 |
| <i>RAB5A</i>           | 1,07  | 1,75E-01 | 4,33E-01 |
| <i>C11orf59</i>        | 1,04  | 1,75E-01 | 4,33E-01 |
| <i>DHRS2</i>           | -1,22 | 1,75E-01 | 4,33E-01 |
| <i>AK124803</i>        | -1,19 | 1,75E-01 | 4,33E-01 |
| <i>BX337332</i>        | -1,14 | 1,75E-01 | 4,33E-01 |
| <i>UNQ5783</i>         | -1,05 | 1,75E-01 | 4,33E-01 |
| <i>CA5A</i>            | -1,05 | 1,75E-01 | 4,33E-01 |
| <i>CEP63</i>           | 1,04  | 1,75E-01 | 4,33E-01 |
| <i>C1orf211</i>        | 1,05  | 1,75E-01 | 4,33E-01 |
| <i>LNX2</i>            | 1,05  | 1,75E-01 | 4,33E-01 |
| <i>FMNL1</i>           | 1,09  | 1,75E-01 | 4,33E-01 |
| <i>RP4-756G23.1</i>    | 1,09  | 1,75E-01 | 4,33E-01 |
| <i>CMAH</i>            | 1,10  | 1,75E-01 | 4,33E-01 |
| <i>SMOC1</i>           | 1,25  | 1,75E-01 | 4,33E-01 |
| <i>CREG2</i>           | -1,12 | 1,75E-01 | 4,33E-01 |
| <i>RABEP2</i>          | 1,05  | 1,75E-01 | 4,33E-01 |
| <i>POU2F2</i>          | 1,06  | 1,75E-01 | 4,33E-01 |
| <i>A_24_P625898</i>    | 1,10  | 1,75E-01 | 4,33E-01 |
| <i>ENST00000341955</i> | 1,12  | 1,75E-01 | 4,33E-01 |
| <i>COG8</i>            | -1,05 | 1,76E-01 | 4,34E-01 |
| <i>INHA</i>            | -1,06 | 1,76E-01 | 4,34E-01 |

|                        |       |          |          |
|------------------------|-------|----------|----------|
| <i>C3orf9</i>          | -1,06 | 1,76E-01 | 4,34E-01 |
| <i>ABTB1</i>           | 1,11  | 1,76E-01 | 4,34E-01 |
| <i>CR613972</i>        | 1,13  | 1,76E-01 | 4,34E-01 |
| <i>LIFR</i>            | -1,14 | 1,76E-01 | 4,34E-01 |
| <i>LOC400879</i>       | -1,11 | 1,76E-01 | 4,34E-01 |
| <i>C14orf104</i>       | -1,08 | 1,76E-01 | 4,34E-01 |
| <i>LSM11</i>           | -1,07 | 1,76E-01 | 4,34E-01 |
| <i>THC2397741</i>      | -1,07 | 1,76E-01 | 4,34E-01 |
| <i>C21orf45</i>        | -1,06 | 1,76E-01 | 4,34E-01 |
| <i>THC2434791</i>      | -1,05 | 1,76E-01 | 4,34E-01 |
| <i>A_24_P50567</i>     | -1,05 | 1,76E-01 | 4,34E-01 |
| <i>ZNF286</i>          | -1,05 | 1,76E-01 | 4,34E-01 |
| <i>TTC4</i>            | -1,05 | 1,76E-01 | 4,34E-01 |
| <i>ENST00000354618</i> | -1,03 | 1,76E-01 | 4,34E-01 |
| <i>ENST00000366623</i> | 1,06  | 1,76E-01 | 4,34E-01 |
| <i>A_24_P926813</i>    | 1,06  | 1,76E-01 | 4,34E-01 |
| <i>C20orf26</i>        | 1,07  | 1,76E-01 | 4,34E-01 |
| <i>A_24_P655735</i>    | 1,09  | 1,76E-01 | 4,34E-01 |
| <i>NTRK3</i>           | 1,27  | 1,76E-01 | 4,34E-01 |
| <i>TIPRL</i>           | 1,05  | 1,76E-01 | 4,34E-01 |
| <i>C1orf173</i>        | -1,07 | 1,76E-01 | 4,34E-01 |
| <i>DB352127</i>        | -1,06 | 1,76E-01 | 4,34E-01 |
| <i>ID1</i>             | 1,15  | 1,76E-01 | 4,34E-01 |
| <i>FLJ20323</i>        | -1,05 | 1,76E-01 | 4,34E-01 |
| <i>STRN</i>            | 1,05  | 1,76E-01 | 4,34E-01 |
| <i>AI559980</i>        | 1,07  | 1,76E-01 | 4,34E-01 |
| <i>LOC147808</i>       | 1,09  | 1,76E-01 | 4,34E-01 |
| <i>A_32_P208076</i>    | 1,10  | 1,76E-01 | 4,34E-01 |
| <i>MPP1</i>            | -1,05 | 1,76E-01 | 4,35E-01 |
| <i>DYRK4</i>           | -1,06 | 1,76E-01 | 4,35E-01 |
| <i>PSG2</i>            | 1,04  | 1,76E-01 | 4,35E-01 |
| <i>KIAA0232</i>        | 1,05  | 1,76E-01 | 4,35E-01 |
| <i>RP11-444E17.2</i>   | -1,04 | 1,77E-01 | 4,35E-01 |
| <i>ANAPC5</i>          | -1,04 | 1,77E-01 | 4,35E-01 |
| <i>CLIC4</i>           | 1,11  | 1,76E-01 | 4,35E-01 |
| <i>FLJ12688</i>        | 1,06  | 1,77E-01 | 4,35E-01 |
| <i>PLVAP</i>           | 1,10  | 1,77E-01 | 4,35E-01 |
| <i>CR623273</i>        | -1,06 | 1,77E-01 | 4,35E-01 |
| <i>LOC646968</i>       | -1,06 | 1,77E-01 | 4,35E-01 |
| <i>ZNF626</i>          | -1,07 | 1,77E-01 | 4,35E-01 |
| <i>U80761</i>          | -1,04 | 1,77E-01 | 4,35E-01 |
| <i>ZNF473</i>          | 1,05  | 1,77E-01 | 4,35E-01 |
| <i>BC030714</i>        | 1,07  | 1,77E-01 | 4,35E-01 |
| <i>NDRG4</i>           | 1,17  | 1,77E-01 | 4,35E-01 |



|                 |       |          |          |
|-----------------|-------|----------|----------|
| PRKCQ           | -1,09 | 1,77E-01 | 4,35E-01 |
| ALOXE3          | 1,06  | 1,77E-01 | 4,35E-01 |
| ENST00000354576 | -1,08 | 1,77E-01 | 4,35E-01 |
| KATNAL2         | -1,06 | 1,77E-01 | 4,35E-01 |
| A_24_P486216    | -1,10 | 1,77E-01 | 4,35E-01 |
| THC2374943      | 1,06  | 1,77E-01 | 4,35E-01 |
| CR603803        | -1,07 | 1,77E-01 | 4,35E-01 |
| BC021738        | -1,06 | 1,77E-01 | 4,35E-01 |
| AI769425        | 1,05  | 1,77E-01 | 4,35E-01 |
| A_24_P815570    | 1,06  | 1,77E-01 | 4,35E-01 |
| REPIN1          | -1,06 | 1,77E-01 | 4,35E-01 |
| THC2404909      | 1,10  | 1,77E-01 | 4,35E-01 |
| MMP10           | 1,05  | 1,77E-01 | 4,36E-01 |
| A_24_P7820      | 1,08  | 1,77E-01 | 4,36E-01 |
| AK125672        | -1,13 | 1,77E-01 | 4,36E-01 |
| MAP9            | 1,07  | 1,77E-01 | 4,36E-01 |
| H01893          | -1,05 | 1,77E-01 | 4,36E-01 |
| A_32_P35839     | 1,05  | 1,77E-01 | 4,36E-01 |
| BQ213856        | 1,12  | 1,77E-01 | 4,36E-01 |
| A_32_P147500    | -1,10 | 1,77E-01 | 4,36E-01 |
| PRO2214         | -1,07 | 1,77E-01 | 4,36E-01 |
| LOC204010       | -1,04 | 1,77E-01 | 4,36E-01 |
| A_24_P940763    | 1,05  | 1,77E-01 | 4,36E-01 |
| DKK4            | 1,16  | 1,77E-01 | 4,36E-01 |
| AK091573        | -1,12 | 1,77E-01 | 4,36E-01 |
| ADPGK           | -1,06 | 1,77E-01 | 4,36E-01 |
| A_24_P745670    | 1,07  | 1,77E-01 | 4,36E-01 |
| LOC144486       | 1,06  | 1,78E-01 | 4,36E-01 |
| THC2374204      | 1,05  | 1,78E-01 | 4,36E-01 |
| A_24_P921376    | 1,06  | 1,78E-01 | 4,36E-01 |
| MMP7            | -1,06 | 1,78E-01 | 4,36E-01 |
| FZD3            | -1,25 | 1,78E-01 | 4,36E-01 |
| MRPL32          | 1,06  | 1,78E-01 | 4,36E-01 |
| AK026429        | 1,06  | 1,78E-01 | 4,36E-01 |
| RB1CC1          | 1,07  | 1,78E-01 | 4,36E-01 |
| THC2445377      | 1,05  | 1,78E-01 | 4,36E-01 |
| A_24_P178523    | 1,04  | 1,78E-01 | 4,36E-01 |
| GPR15           | -1,06 | 1,78E-01 | 4,36E-01 |
| KRR1            | 1,05  | 1,78E-01 | 4,36E-01 |
| A_24_P914908    | 1,05  | 1,78E-01 | 4,36E-01 |
| BC061638        | 1,05  | 1,78E-01 | 4,36E-01 |
| C1orf165        | -1,06 | 1,78E-01 | 4,36E-01 |
| CSN1S1          | 1,05  | 1,78E-01 | 4,37E-01 |
| IPMK            | 1,05  | 1,78E-01 | 4,37E-01 |

|                 |       |          |          |
|-----------------|-------|----------|----------|
| SAC             | -1,05 | 1,78E-01 | 4,37E-01 |
| AI024778        | -1,07 | 1,78E-01 | 4,37E-01 |
| AK024584        | -1,11 | 1,78E-01 | 4,37E-01 |
| PIGF            | -1,07 | 1,78E-01 | 4,37E-01 |
| CASQ2           | 1,22  | 1,78E-01 | 4,37E-01 |
| COX7A2L         | -1,05 | 1,78E-01 | 4,37E-01 |
| SFRS10          | 1,05  | 1,78E-01 | 4,37E-01 |
| ENST00000329385 | 1,06  | 1,78E-01 | 4,37E-01 |
| CNTNAP2         | 1,07  | 1,78E-01 | 4,37E-01 |
| A_24_P706752    | -1,06 | 1,78E-01 | 4,37E-01 |
| KIAA1430        | -1,05 | 1,78E-01 | 4,37E-01 |
| EEF2K           | -1,11 | 1,78E-01 | 4,37E-01 |
| THC2277620      | -1,05 | 1,78E-01 | 4,37E-01 |
| C7orf13         | -1,07 | 1,78E-01 | 4,37E-01 |
| THC2308158      | -1,07 | 1,78E-01 | 4,37E-01 |
| IBSP            | 1,13  | 1,79E-01 | 4,37E-01 |
| LOC92691        | -1,04 | 1,79E-01 | 4,37E-01 |
| CCHCR1          | -1,04 | 1,79E-01 | 4,37E-01 |
| AIF1            | -1,09 | 1,79E-01 | 4,37E-01 |
| MLL3            | 1,04  | 1,79E-01 | 4,37E-01 |
| USP53           | -1,11 | 1,79E-01 | 4,37E-01 |
| GPRC5D          | 1,05  | 1,79E-01 | 4,37E-01 |
| CD59            | 1,07  | 1,79E-01 | 4,37E-01 |
| ENST00000271124 | 1,12  | 1,79E-01 | 4,37E-01 |
| ATM             | -1,05 | 1,79E-01 | 4,37E-01 |
| C6orf194        | 1,05  | 1,79E-01 | 4,37E-01 |
| FAM73A          | 1,06  | 1,79E-01 | 4,37E-01 |
| U79301          | -1,09 | 1,79E-01 | 4,37E-01 |
| METTL6          | -1,04 | 1,79E-01 | 4,37E-01 |
| TJP1            | 1,06  | 1,79E-01 | 4,37E-01 |
| A_24_P67268     | 1,07  | 1,79E-01 | 4,38E-01 |
| THC2279436      | -1,06 | 1,79E-01 | 4,38E-01 |
| RP4-742C19.3    | 1,06  | 1,79E-01 | 4,38E-01 |
| LBX2            | 1,06  | 1,79E-01 | 4,38E-01 |
| ENST00000283694 | -1,15 | 1,79E-01 | 4,38E-01 |
| THC2410202      | -1,10 | 1,79E-01 | 4,38E-01 |
| AT_T_5          | 1,02  | 1,79E-01 | 4,38E-01 |
| SFXN3           | 1,05  | 1,79E-01 | 4,38E-01 |
| MGC4655         | -1,09 | 1,79E-01 | 4,38E-01 |
| TAS2R39         | 1,07  | 1,79E-01 | 4,38E-01 |
| A_24_P3627      | -1,08 | 1,79E-01 | 4,38E-01 |
| LCN2            | -1,37 | 1,79E-01 | 4,38E-01 |
| THUMPD3         | 1,05  | 1,79E-01 | 4,38E-01 |
| DAZAP2          | 1,05  | 1,79E-01 | 4,38E-01 |

|                        |       |          |          |
|------------------------|-------|----------|----------|
| <i>GRIA4</i>           | -1,09 | 1,79E-01 | 4,38E-01 |
| <i>THC2450799</i>      | -1,29 | 1,79E-01 | 4,38E-01 |
| <i>RASSF3</i>          | 1,05  | 1,79E-01 | 4,38E-01 |
| <i>A_24_P930717</i>    | 1,05  | 1,79E-01 | 4,38E-01 |
| <i>AY203928</i>        | -1,09 | 1,79E-01 | 4,38E-01 |
| <i>AP1B1</i>           | 1,06  | 1,79E-01 | 4,38E-01 |
| <i>C9orf80</i>         | -1,05 | 1,79E-01 | 4,38E-01 |
| <i>RPS13</i>           | -1,05 | 1,79E-01 | 4,38E-01 |
| <i>A_24_P272590</i>    | -1,05 | 1,80E-01 | 4,38E-01 |
| <i>THC2344886</i>      | -1,09 | 1,80E-01 | 4,39E-01 |
| <i>AK123333</i>        | -1,08 | 1,80E-01 | 4,39E-01 |
| <i>AK074630</i>        | -1,06 | 1,80E-01 | 4,39E-01 |
| <i>ADAM12</i>          | -1,30 | 1,80E-01 | 4,39E-01 |
| <i>LOC389394</i>       | -1,05 | 1,80E-01 | 4,39E-01 |
| <i>POU3F1</i>          | 1,03  | 1,80E-01 | 4,39E-01 |
| <i>C20orf144</i>       | 1,04  | 1,80E-01 | 4,39E-01 |
| <i>SH3BP5</i>          | -1,07 | 1,80E-01 | 4,39E-01 |
| <i>AK026295</i>        | -1,07 | 1,80E-01 | 4,39E-01 |
| <i>DA351082</i>        | -1,04 | 1,80E-01 | 4,39E-01 |
| <i>A_24_P927553</i>    | 1,06  | 1,80E-01 | 4,39E-01 |
| <i>ADCK2</i>           | 1,07  | 1,80E-01 | 4,39E-01 |
| <i>AF090884</i>        | 1,04  | 1,80E-01 | 4,39E-01 |
| <i>ATP6V1E2</i>        | -1,07 | 1,80E-01 | 4,39E-01 |
| <i>SCOTIN</i>          | 1,05  | 1,80E-01 | 4,39E-01 |
| <i>CACYBP</i>          | -1,05 | 1,80E-01 | 4,39E-01 |
| <i>THC2446522</i>      | 1,06  | 1,80E-01 | 4,39E-01 |
| <i>THC2399007</i>      | 1,06  | 1,80E-01 | 4,39E-01 |
| <i>AK127258</i>        | -1,10 | 1,80E-01 | 4,39E-01 |
| <i>A_24_P665621</i>    | -1,07 | 1,80E-01 | 4,39E-01 |
| <i>ENST00000309184</i> | -1,05 | 1,80E-01 | 4,39E-01 |
| <i>RPL4</i>            | -1,04 | 1,80E-01 | 4,39E-01 |
| <i>OPN1SW</i>          | 1,06  | 1,80E-01 | 4,39E-01 |
| <i>FAM59A</i>          | 1,09  | 1,80E-01 | 4,39E-01 |
| <i>PCDH10</i>          | 1,19  | 1,80E-01 | 4,39E-01 |
| <i>FAM118B</i>         | -1,07 | 1,80E-01 | 4,39E-01 |
| <i>NCAM1</i>           | -1,08 | 1,80E-01 | 4,39E-01 |
| <i>GTF2H3</i>          | -1,05 | 1,80E-01 | 4,39E-01 |
| <i>FPGS</i>            | 1,05  | 1,80E-01 | 4,39E-01 |
| <i>IL1F5</i>           | -1,08 | 1,80E-01 | 4,40E-01 |
| <i>PRDX4</i>           | -1,10 | 1,81E-01 | 4,40E-01 |
| <i>CCDC88</i>          | -1,10 | 1,81E-01 | 4,40E-01 |
| <i>BC036645</i>        | -1,06 | 1,80E-01 | 4,40E-01 |
| <i>PML</i>             | -1,05 | 1,81E-01 | 4,40E-01 |
| <i>ERO1LB</i>          | 1,06  | 1,81E-01 | 4,40E-01 |

|                        |       |          |          |
|------------------------|-------|----------|----------|
| <i>A_32_P4608</i>      | 1,09  | 1,81E-01 | 4,40E-01 |
| <i>ENST00000285206</i> | 1,14  | 1,80E-01 | 4,40E-01 |
| <i>BQ185350</i>        | 1,05  | 1,81E-01 | 4,40E-01 |
| <i>KIAA1407</i>        | -1,06 | 1,81E-01 | 4,40E-01 |
| <i>A_24_P720730</i>    | -1,05 | 1,81E-01 | 4,40E-01 |
| <i>XLKD1</i>           | -1,12 | 1,81E-01 | 4,40E-01 |
| <i>KIAA0692</i>        | -1,04 | 1,81E-01 | 4,40E-01 |
| <i>CD3D</i>            | -1,15 | 1,81E-01 | 4,40E-01 |
| <i>T89979</i>          | -1,05 | 1,81E-01 | 4,40E-01 |
| <i>LBR</i>             | -1,12 | 1,81E-01 | 4,40E-01 |
| <i>PSCD4</i>           | -1,09 | 1,81E-01 | 4,40E-01 |
| <i>PMCH</i>            | -1,05 | 1,81E-01 | 4,40E-01 |
| <i>ENST00000276173</i> | -1,04 | 1,81E-01 | 4,40E-01 |
| <i>AK022971</i>        | 1,08  | 1,81E-01 | 4,40E-01 |
| <i>WNK4</i>            | -1,06 | 1,81E-01 | 4,40E-01 |
| <i>AK025182</i>        | 1,06  | 1,81E-01 | 4,40E-01 |
| <i>PLEKHG1</i>         | -1,10 | 1,81E-01 | 4,40E-01 |
| <i>BM994983</i>        | 1,07  | 1,81E-01 | 4,40E-01 |
| <i>FBXO32</i>          | 1,20  | 1,81E-01 | 4,40E-01 |
| <i>RNF41</i>           | 1,06  | 1,81E-01 | 4,40E-01 |
| <i>A_24_P941450</i>    | 1,06  | 1,81E-01 | 4,40E-01 |
| <i>HMMR</i>            | -1,10 | 1,81E-01 | 4,40E-01 |
| <i>NEDD1</i>           | 1,05  | 1,81E-01 | 4,40E-01 |
| <i>GLS</i>             | 1,06  | 1,81E-01 | 4,40E-01 |
| <i>T35358</i>          | 1,05  | 1,81E-01 | 4,40E-01 |
| <i>HIST1H2AJ</i>       | 1,06  | 1,81E-01 | 4,40E-01 |
| <i>EXOSC10</i>         | -1,05 | 1,81E-01 | 4,41E-01 |
| <i>FLJ38359</i>        | 1,09  | 1,81E-01 | 4,41E-01 |
| <i>BX114967</i>        | 1,15  | 1,81E-01 | 4,41E-01 |
| <i>AF116656</i>        | -1,06 | 1,81E-01 | 4,41E-01 |
| <i>CR625571</i>        | 1,04  | 1,81E-01 | 4,41E-01 |
| <i>AI138440</i>        | 1,06  | 1,81E-01 | 4,41E-01 |
| <i>CXYorf2</i>         | -1,06 | 1,82E-01 | 4,41E-01 |
| <i>A_24_P88493</i>     | -1,05 | 1,81E-01 | 4,41E-01 |
| <i>PMM1</i>            | -1,04 | 1,81E-01 | 4,41E-01 |
| <i>EHD3</i>            | 1,06  | 1,81E-01 | 4,41E-01 |
| <i>GRTP1</i>           | -1,08 | 1,82E-01 | 4,41E-01 |
| <i>BCS1L</i>           | -1,05 | 1,82E-01 | 4,41E-01 |
| <i>A_32_P68516</i>     | 1,10  | 1,82E-01 | 4,41E-01 |
| <i>A_24_P523368</i>    | -1,06 | 1,82E-01 | 4,41E-01 |
| <i>THC2442020</i>      | -1,08 | 1,82E-01 | 4,41E-01 |
| <i>SP4</i>             | 1,07  | 1,82E-01 | 4,41E-01 |
| <i>BG209623</i>        | 1,07  | 1,82E-01 | 4,41E-01 |
| <i>ENST00000278590</i> | 1,08  | 1,82E-01 | 4,41E-01 |

|                        |       |          |          |
|------------------------|-------|----------|----------|
| <i>ALPK1</i>           | -1,11 | 1,82E-01 | 4,41E-01 |
| <i>ENST00000295181</i> | -1,04 | 1,82E-01 | 4,41E-01 |
| <i>MEGF10</i>          | 1,06  | 1,82E-01 | 4,41E-01 |
| <i>TRIM5</i>           | 1,06  | 1,82E-01 | 4,41E-01 |
| <i>AF159295</i>        | 1,08  | 1,82E-01 | 4,41E-01 |
| <i>THC2270160</i>      | -1,07 | 1,82E-01 | 4,41E-01 |
| <i>SLAMF9</i>          | -1,19 | 1,82E-01 | 4,41E-01 |
| <i>A_24_P7494</i>      | 1,07  | 1,82E-01 | 4,41E-01 |
| <i>A_24_P923225</i>    | 1,06  | 1,82E-01 | 4,41E-01 |
| <i>SLC37A2</i>         | -1,12 | 1,82E-01 | 4,41E-01 |
| <i>GPX7</i>            | -1,09 | 1,82E-01 | 4,41E-01 |
| <i>TDRD1</i>           | -1,05 | 1,82E-01 | 4,41E-01 |
| <i>KIAA1632</i>        | -1,04 | 1,82E-01 | 4,41E-01 |
| <i>A_24_P752690</i>    | 1,05  | 1,82E-01 | 4,41E-01 |
| <i>THC2302427</i>      | 1,06  | 1,82E-01 | 4,41E-01 |
| <i>BX117479</i>        | 1,18  | 1,82E-01 | 4,41E-01 |
| <i>AK001829</i>        | -1,08 | 1,82E-01 | 4,41E-01 |
| <i>BRAP</i>            | 1,05  | 1,82E-01 | 4,41E-01 |
| <i>A_24_P147849</i>    | 1,34  | 1,82E-01 | 4,41E-01 |
| <i>ZNF406</i>          | -1,09 | 1,82E-01 | 4,42E-01 |
| <i>KIAA1641</i>        | -1,05 | 1,82E-01 | 4,42E-01 |
| <i>PPP1R3B</i>         | 1,12  | 1,82E-01 | 4,42E-01 |
| <i>KCNA5</i>           | 1,33  | 1,82E-01 | 4,42E-01 |
| <i>PIK3R4</i>          | -1,04 | 1,82E-01 | 4,42E-01 |
| <i>SAP130</i>          | -1,04 | 1,82E-01 | 4,42E-01 |
| <i>BC041686</i>        | -1,08 | 1,82E-01 | 4,42E-01 |
| <i>TMCO3</i>           | -1,06 | 1,82E-01 | 4,42E-01 |
| <i>THC2314725</i>      | -1,05 | 1,82E-01 | 4,42E-01 |
| <i>CYB5B</i>           | 1,05  | 1,82E-01 | 4,42E-01 |
| <i>C16orf5</i>         | -1,05 | 1,82E-01 | 4,42E-01 |
| <i>AF116681</i>        | -1,07 | 1,83E-01 | 4,42E-01 |
| <i>MRPL17</i>          | -1,06 | 1,83E-01 | 4,42E-01 |
| <i>A_32_P121334</i>    | -1,05 | 1,82E-01 | 4,42E-01 |
| <i>A_24_P238286</i>    | 1,05  | 1,82E-01 | 4,42E-01 |
| <i>LOC285216</i>       | 1,07  | 1,83E-01 | 4,42E-01 |
| <i>ENST00000338358</i> | -1,06 | 1,83E-01 | 4,42E-01 |
| <i>A_24_P937734</i>    | 1,04  | 1,83E-01 | 4,42E-01 |
| <i>ENST00000344158</i> | 1,07  | 1,83E-01 | 4,42E-01 |
| <i>CIB3</i>            | 1,04  | 1,83E-01 | 4,42E-01 |
| <i>RLN3</i>            | 1,05  | 1,83E-01 | 4,42E-01 |
| <i>BX104176</i>        | 1,06  | 1,83E-01 | 4,42E-01 |
| <i>LOC344167</i>       | 1,05  | 1,83E-01 | 4,42E-01 |
| <i>LOC158825</i>       | 1,06  | 1,83E-01 | 4,42E-01 |
| <i>BIRC4</i>           | 1,07  | 1,83E-01 | 4,42E-01 |

|                        |       |          |          |
|------------------------|-------|----------|----------|
| <i>GRIK4</i>           | 1,07  | 1,83E-01 | 4,42E-01 |
| <i>ABCF2</i>           | 1,05  | 1,83E-01 | 4,42E-01 |
| <i>SCARA5</i>          | -1,19 | 1,83E-01 | 4,42E-01 |
| <i>SARS</i>            | 1,05  | 1,83E-01 | 4,43E-01 |
| <i>BPI</i>             | -1,07 | 1,83E-01 | 4,43E-01 |
| <i>BF692226</i>        | -1,06 | 1,83E-01 | 4,43E-01 |
| <i>HTR3B</i>           | -1,05 | 1,83E-01 | 4,43E-01 |
| <i>EXOC7</i>           | -1,05 | 1,83E-01 | 4,43E-01 |
| <i>EPHA2</i>           | 1,10  | 1,83E-01 | 4,43E-01 |
| <i>LOC440419</i>       | 1,04  | 1,83E-01 | 4,43E-01 |
| <i>UGT2B7</i>          | 1,06  | 1,83E-01 | 4,43E-01 |
| <i>BF909544</i>        | -1,04 | 1,83E-01 | 4,43E-01 |
| <i>THC2318860</i>      | -1,06 | 1,83E-01 | 4,43E-01 |
| <i>CXorf1</i>          | -1,04 | 1,84E-01 | 4,43E-01 |
| <i>UGT2B10</i>         | 1,04  | 1,84E-01 | 4,43E-01 |
| <i>THC2428861</i>      | 1,05  | 1,84E-01 | 4,43E-01 |
| <i>A_24_P195936</i>    | 1,07  | 1,84E-01 | 4,43E-01 |
| <i>A_24_P290214</i>    | 1,11  | 1,84E-01 | 4,43E-01 |
| <i>GSDMDC1</i>         | 1,06  | 1,84E-01 | 4,44E-01 |
| <i>ZNF584</i>          | -1,06 | 1,84E-01 | 4,44E-01 |
| <i>THC2313033</i>      | -1,10 | 1,84E-01 | 4,44E-01 |
| <i>A_24_P910483</i>    | 1,05  | 1,84E-01 | 4,44E-01 |
| <i>FLJ25778</i>        | 1,06  | 1,84E-01 | 4,44E-01 |
| <i>AA780798</i>        | 1,10  | 1,84E-01 | 4,44E-01 |
| <i>THC2413765</i>      | 1,08  | 1,84E-01 | 4,44E-01 |
| <i>A_24_P933305</i>    | -1,66 | 1,84E-01 | 4,44E-01 |
| <i>FLJ37035</i>        | -1,04 | 1,84E-01 | 4,44E-01 |
| <i>A_24_P893668</i>    | -1,06 | 1,84E-01 | 4,44E-01 |
| <i>THC2338749</i>      | 1,06  | 1,84E-01 | 4,44E-01 |
| <i>LEMD3</i>           | -1,07 | 1,84E-01 | 4,44E-01 |
| <i>FAM48A</i>          | -1,05 | 1,84E-01 | 4,44E-01 |
| <i>ENST00000288548</i> | -1,09 | 1,84E-01 | 4,44E-01 |
| <i>ZNF283</i>          | -1,06 | 1,84E-01 | 4,44E-01 |
| <i>MTNR1A</i>          | -1,05 | 1,84E-01 | 4,44E-01 |
| <i>BC036702</i>        | 1,05  | 1,84E-01 | 4,44E-01 |
| <i>A_24_P93503</i>     | 1,07  | 1,84E-01 | 4,44E-01 |
| <i>A_24_P75408</i>     | 1,05  | 1,84E-01 | 4,44E-01 |
| <i>CRHR2</i>           | -1,05 | 1,84E-01 | 4,44E-01 |
| <i>RNF17</i>           | 1,05  | 1,84E-01 | 4,44E-01 |
| <i>THC2388093</i>      | -1,05 | 1,84E-01 | 4,44E-01 |
| <i>TRIM63</i>          | -1,30 | 1,84E-01 | 4,44E-01 |
| <i>THC2384778</i>      | -1,06 | 1,84E-01 | 4,44E-01 |
| <i>ARHGAP21</i>        | -1,05 | 1,84E-01 | 4,44E-01 |
| <i>AQP4</i>            | 1,04  | 1,84E-01 | 4,44E-01 |

|                        |       |          |          |
|------------------------|-------|----------|----------|
| <i>A_32_P104572</i>    | 1,05  | 1,84E-01 | 4,44E-01 |
| <i>ARHGDI6</i>         | 1,08  | 1,84E-01 | 4,44E-01 |
| <i>N50366</i>          | 1,07  | 1,84E-01 | 4,44E-01 |
| <i>A_32_P224926</i>    | -1,05 | 1,84E-01 | 4,44E-01 |
| <i>POLR2C</i>          | -1,05 | 1,84E-01 | 4,44E-01 |
| <i>C15orf29</i>        | 1,06  | 1,84E-01 | 4,44E-01 |
| <i>AK090913</i>        | -1,04 | 1,84E-01 | 4,44E-01 |
| <i>BLMH</i>            | -1,04 | 1,84E-01 | 4,44E-01 |
| <i>SLC1A5</i>          | 1,11  | 1,84E-01 | 4,44E-01 |
| <i>MRPS31</i>          | -1,06 | 1,84E-01 | 4,44E-01 |
| <i>A_24_P922308</i>    | 1,05  | 1,84E-01 | 4,44E-01 |
| <i>CPE</i>             | 1,14  | 1,84E-01 | 4,44E-01 |
| <i>COL16A1</i>         | -1,12 | 1,85E-01 | 4,44E-01 |
| <i>TLK1</i>            | 1,05  | 1,85E-01 | 4,44E-01 |
| <i>LOC91316</i>        | -1,07 | 1,85E-01 | 4,45E-01 |
| <i>ARPC4</i>           | 1,04  | 1,85E-01 | 4,45E-01 |
| <i>SELPLG</i>          | -1,07 | 1,85E-01 | 4,45E-01 |
| <i>AK128263</i>        | -1,10 | 1,85E-01 | 4,45E-01 |
| <i>SYT15</i>           | -1,09 | 1,85E-01 | 4,45E-01 |
| <i>XPOT</i>            | -1,07 | 1,85E-01 | 4,45E-01 |
| <i>HNRPD</i>           | -1,04 | 1,85E-01 | 4,45E-01 |
| <i>AK001814</i>        | 1,07  | 1,85E-01 | 4,45E-01 |
| <i>F11R</i>            | 1,13  | 1,85E-01 | 4,45E-01 |
| <i>SAMD13</i>          | -1,06 | 1,85E-01 | 4,45E-01 |
| <i>BAT4</i>            | -1,05 | 1,85E-01 | 4,45E-01 |
| <i>CN480368</i>        | -1,05 | 1,85E-01 | 4,45E-01 |
| <i>UBQLN3</i>          | -1,05 | 1,85E-01 | 4,45E-01 |
| <i>LOC440577</i>       | -1,06 | 1,85E-01 | 4,45E-01 |
| <i>GAD2</i>            | 1,05  | 1,85E-01 | 4,45E-01 |
| <i>FUBP1</i>           | 1,07  | 1,85E-01 | 4,46E-01 |
| <i>A_32_P17672</i>     | -1,05 | 1,85E-01 | 4,46E-01 |
| <i>ESRRA</i>           | 1,05  | 1,85E-01 | 4,46E-01 |
| <i>A_24_P919283</i>    | -1,10 | 1,85E-01 | 4,46E-01 |
| <i>GTF2E1</i>          | -1,06 | 1,85E-01 | 4,46E-01 |
| <i>ENST00000375664</i> | -1,06 | 1,85E-01 | 4,46E-01 |
| <i>A_24_P918561</i>    | 1,05  | 1,85E-01 | 4,46E-01 |
| <i>MAPK4</i>           | 1,33  | 1,85E-01 | 4,46E-01 |
| <i>FLJ40172</i>        | 1,06  | 1,85E-01 | 4,46E-01 |
| <i>LRDD</i>            | -1,06 | 1,85E-01 | 4,46E-01 |
| <i>KIFAP3</i>          | -1,06 | 1,86E-01 | 4,46E-01 |
| <i>BLOC1S1</i>         | 1,06  | 1,86E-01 | 4,46E-01 |
| <i>LOC440248</i>       | -1,08 | 1,86E-01 | 4,46E-01 |
| <i>THC2287049</i>      | -1,06 | 1,86E-01 | 4,46E-01 |
| <i>A_24_P942798</i>    | -1,07 | 1,86E-01 | 4,46E-01 |

|                        |       |          |          |
|------------------------|-------|----------|----------|
| <i>BCL2L12</i>         | 1,04  | 1,86E-01 | 4,46E-01 |
| <i>WDR62</i>           | 1,05  | 1,86E-01 | 4,46E-01 |
| <i>NTNG1</i>           | -1,15 | 1,86E-01 | 4,46E-01 |
| <i>FLG</i>             | -1,11 | 1,86E-01 | 4,46E-01 |
| <i>ZMYND19</i>         | -1,05 | 1,86E-01 | 4,46E-01 |
| <i>BTN2A3</i>          | 1,03  | 1,86E-01 | 4,46E-01 |
| <i>KLHDC2</i>          | -1,07 | 1,86E-01 | 4,46E-01 |
| <i>ENTPD2</i>          | 1,04  | 1,86E-01 | 4,46E-01 |
| <i>AK098812</i>        | 1,18  | 1,86E-01 | 4,46E-01 |
| <i>PIGY</i>            | -1,06 | 1,86E-01 | 4,47E-01 |
| <i>LILRB4</i>          | 1,04  | 1,86E-01 | 4,47E-01 |
| <i>ENST00000340926</i> | 1,08  | 1,86E-01 | 4,47E-01 |
| <i>PHGDH</i>           | -1,10 | 1,86E-01 | 4,47E-01 |
| <i>SH3TC2</i>          | 1,10  | 1,86E-01 | 4,47E-01 |
| <i>CCNG1</i>           | -1,08 | 1,86E-01 | 4,47E-01 |
| <i>LRRCC1</i>          | 1,06  | 1,86E-01 | 4,47E-01 |
| <i>A_24_P323805</i>    | -1,05 | 1,86E-01 | 4,47E-01 |
| <i>BX094364</i>        | 1,04  | 1,86E-01 | 4,47E-01 |
| <i>BC037328</i>        | -1,09 | 1,86E-01 | 4,47E-01 |
| <i>THC2399335</i>      | -1,07 | 1,86E-01 | 4,47E-01 |
| <i>GOLGA7</i>          | -1,04 | 1,86E-01 | 4,47E-01 |
| <i>LOC654780</i>       | 1,05  | 1,86E-01 | 4,47E-01 |
| <i>CCDC45</i>          | -1,07 | 1,86E-01 | 4,47E-01 |
| <i>LOC286334</i>       | -1,06 | 1,86E-01 | 4,47E-01 |
| <i>SETD3</i>           | 1,05  | 1,86E-01 | 4,47E-01 |
| <i>ARHGDI1</i>         | 1,06  | 1,86E-01 | 4,47E-01 |
| <i>AL390181</i>        | -1,09 | 1,86E-01 | 4,47E-01 |
| <i>AK001533</i>        | -1,06 | 1,86E-01 | 4,47E-01 |
| <i>GOLT1A</i>          | -1,06 | 1,86E-01 | 4,47E-01 |
| <i>CIT</i>             | 1,17  | 1,86E-01 | 4,47E-01 |
| <i>C1orf105</i>        | -1,05 | 1,87E-01 | 4,47E-01 |
| <i>MRPS24</i>          | 1,04  | 1,87E-01 | 4,47E-01 |
| <i>CB114326</i>        | 1,04  | 1,87E-01 | 4,47E-01 |
| <i>A_24_P290134</i>    | 1,05  | 1,87E-01 | 4,47E-01 |
| <i>THC2317675</i>      | -1,11 | 1,87E-01 | 4,47E-01 |
| <i>TPRXL</i>           | 1,10  | 1,87E-01 | 4,47E-01 |
| <i>CRAT</i>            | 1,05  | 1,87E-01 | 4,48E-01 |
| <i>FLJ30046</i>        | 1,07  | 1,87E-01 | 4,48E-01 |
| <i>AI457687</i>        | 1,05  | 1,87E-01 | 4,48E-01 |
| <i>A_32_P188404</i>    | -1,04 | 1,87E-01 | 4,48E-01 |
| <i>SEMA3C</i>          | -1,13 | 1,87E-01 | 4,48E-01 |
| <i>LOC554248</i>       | -1,07 | 1,87E-01 | 4,48E-01 |
| <i>C20orf119</i>       | -1,06 | 1,87E-01 | 4,48E-01 |
| <i>NME7</i>            | -1,06 | 1,87E-01 | 4,48E-01 |



|                 |       |          |          |
|-----------------|-------|----------|----------|
| PCCA            | -1,04 | 1,87E-01 | 4,48E-01 |
| BE093050        | -1,06 | 1,87E-01 | 4,48E-01 |
| BC065737        | -1,07 | 1,87E-01 | 4,48E-01 |
| PRDM14          | -1,05 | 1,87E-01 | 4,48E-01 |
| A_24_P15821     | 1,05  | 1,87E-01 | 4,48E-01 |
| WFDC6           | -1,04 | 1,87E-01 | 4,48E-01 |
| AK001998        | -1,05 | 1,87E-01 | 4,48E-01 |
| COL6A1          | -1,08 | 1,87E-01 | 4,49E-01 |
| KBTBD9          | -1,04 | 1,87E-01 | 4,49E-01 |
| ABC1            | -1,05 | 1,88E-01 | 4,49E-01 |
| BF376089        | -1,04 | 1,88E-01 | 4,49E-01 |
| VASP            | 1,12  | 1,88E-01 | 4,49E-01 |
| U92025          | -1,07 | 1,88E-01 | 4,49E-01 |
| SMAP1L          | 1,06  | 1,88E-01 | 4,49E-01 |
| WDR49           | 1,05  | 1,88E-01 | 4,49E-01 |
| THOC3           | -1,11 | 1,88E-01 | 4,49E-01 |
| AF086546        | -1,09 | 1,88E-01 | 4,49E-01 |
| AMIGO2          | -1,09 | 1,88E-01 | 4,49E-01 |
| RPP40           | -1,08 | 1,88E-01 | 4,49E-01 |
| NEK3            | -1,07 | 1,88E-01 | 4,49E-01 |
| ENST00000333010 | -1,06 | 1,88E-01 | 4,49E-01 |
| HINT2           | 1,05  | 1,88E-01 | 4,49E-01 |
| COPG2           | 1,05  | 1,88E-01 | 4,49E-01 |
| DBNL            | 1,05  | 1,88E-01 | 4,49E-01 |
| THC2272949      | 1,06  | 1,88E-01 | 4,49E-01 |
| ENST00000305570 | -1,12 | 1,88E-01 | 4,49E-01 |
| CYP4F12         | -1,09 | 1,88E-01 | 4,49E-01 |
| A_24_P496297    | -1,06 | 1,88E-01 | 4,49E-01 |
| AK023563        | -1,04 | 1,88E-01 | 4,49E-01 |
| HGS             | 1,04  | 1,88E-01 | 4,49E-01 |
| CHURC1          | 1,05  | 1,88E-01 | 4,49E-01 |
| EPS15           | 1,05  | 1,88E-01 | 4,49E-01 |
| INSL4           | 1,05  | 1,88E-01 | 4,49E-01 |
| A_32_P177595    | 1,14  | 1,88E-01 | 4,49E-01 |
| A_24_P323778    | 1,05  | 1,88E-01 | 4,49E-01 |
| TAS2R8          | 1,05  | 1,88E-01 | 4,49E-01 |
| A_24_P418712    | -1,05 | 1,88E-01 | 4,50E-01 |
| AI359141        | 1,06  | 1,88E-01 | 4,50E-01 |
| ENPP5           | 1,15  | 1,88E-01 | 4,50E-01 |
| ENST00000358335 | -1,05 | 1,88E-01 | 4,50E-01 |
| A_24_P76142     | 1,10  | 1,88E-01 | 4,50E-01 |
| L25664          | 1,04  | 1,88E-01 | 4,50E-01 |
| RP11-139H14.4   | 1,05  | 1,88E-01 | 4,50E-01 |
| BC032803        | -1,06 | 1,88E-01 | 4,50E-01 |

|                        |       |          |          |
|------------------------|-------|----------|----------|
| <i>RAD1</i>            | -1,07 | 1,89E-01 | 4,50E-01 |
| <i>RIC3</i>            | -1,13 | 1,89E-01 | 4,50E-01 |
| <i>TRIM49</i>          | -1,09 | 1,89E-01 | 4,50E-01 |
| <i>HISPPD1</i>         | -1,06 | 1,89E-01 | 4,50E-01 |
| <i>TRIM21</i>          | -1,04 | 1,89E-01 | 4,50E-01 |
| <i>PDZRN3</i>          | -1,10 | 1,89E-01 | 4,50E-01 |
| <i>CFI</i>             | -1,10 | 1,89E-01 | 4,50E-01 |
| <i>ENST00000341376</i> | -1,06 | 1,89E-01 | 4,51E-01 |
| <i>SPATA5</i>          | -1,05 | 1,89E-01 | 4,51E-01 |
| <i>FLJ20366</i>        | 1,09  | 1,89E-01 | 4,51E-01 |
| <i>ZAN</i>             | 1,05  | 1,89E-01 | 4,51E-01 |
| <i>ENST00000222690</i> | 1,05  | 1,89E-01 | 4,51E-01 |
| <i>GPR65</i>           | -1,12 | 1,89E-01 | 4,51E-01 |
| <i>AK126405</i>        | -1,11 | 1,89E-01 | 4,51E-01 |
| <i>AK026718</i>        | -1,06 | 1,89E-01 | 4,51E-01 |
| <i>PXDN</i>            | 1,09  | 1,89E-01 | 4,51E-01 |
| <i>TSPAN9</i>          | 1,04  | 1,89E-01 | 4,51E-01 |
| <i>BC068044</i>        | -1,05 | 1,89E-01 | 4,51E-01 |
| <i>CCDC102A</i>        | -1,06 | 1,89E-01 | 4,51E-01 |
| <i>AF086154</i>        | -1,07 | 1,89E-01 | 4,51E-01 |
| <i>THC2384167</i>      | -1,09 | 1,89E-01 | 4,51E-01 |
| <i>DEPDC5</i>          | -1,06 | 1,89E-01 | 4,51E-01 |
| <i>TMEM158</i>         | 1,04  | 1,89E-01 | 4,51E-01 |
| <i>A_24_P809786</i>    | 1,05  | 1,89E-01 | 4,51E-01 |
| <i>AA779418</i>        | 1,08  | 1,89E-01 | 4,51E-01 |
| <i>C17orf69</i>        | -1,07 | 1,89E-01 | 4,51E-01 |
| <i>CAPZA2</i>          | 1,07  | 1,89E-01 | 4,51E-01 |
| <i>C8orf41</i>         | -1,04 | 1,89E-01 | 4,51E-01 |
| <i>MCFD2</i>           | 1,05  | 1,90E-01 | 4,51E-01 |
| <i>A_32_P65793</i>     | 1,07  | 1,89E-01 | 4,51E-01 |
| <i>BQ934520</i>        | 1,05  | 1,90E-01 | 4,51E-01 |
| <i>SLC39A1</i>         | 1,05  | 1,90E-01 | 4,51E-01 |
| <i>HMGB2</i>           | -1,08 | 1,90E-01 | 4,51E-01 |
| <i>A_24_P940260</i>    | 1,07  | 1,90E-01 | 4,51E-01 |
| <i>FLJ45557</i>        | -1,06 | 1,90E-01 | 4,51E-01 |
| <i>PMP2</i>            | 1,22  | 1,90E-01 | 4,51E-01 |
| <i>KCTD17</i>          | 1,05  | 1,90E-01 | 4,51E-01 |
| <i>A_24_P930283</i>    | 1,04  | 1,90E-01 | 4,52E-01 |
| <i>NSMCE2</i>          | 1,04  | 1,90E-01 | 4,52E-01 |
| <i>TMEM37</i>          | -1,13 | 1,90E-01 | 4,52E-01 |
| <i>THC2280003</i>      | 1,05  | 1,90E-01 | 4,52E-01 |
| <i>BCDO2</i>           | 1,08  | 1,90E-01 | 4,52E-01 |
| <i>FLJ45717</i>        | 1,09  | 1,90E-01 | 4,52E-01 |
| <i>RELB</i>            | 1,14  | 1,90E-01 | 4,52E-01 |

|                     |       |          |          |
|---------------------|-------|----------|----------|
| <i>BM975266</i>     | 1,04  | 1,90E-01 | 4,52E-01 |
| <i>SYTL5</i>        | -1,22 | 1,90E-01 | 4,52E-01 |
| <i>LOC196752</i>    | 1,05  | 1,90E-01 | 4,52E-01 |
| <i>KIF7</i>         | 1,06  | 1,90E-01 | 4,52E-01 |
| <i>A_24_P915883</i> | 1,07  | 1,90E-01 | 4,52E-01 |
| <i>TMPIT</i>        | 1,05  | 1,90E-01 | 4,52E-01 |
| <i>GFRA4</i>        | 1,06  | 1,90E-01 | 4,52E-01 |
| <i>A_24_P682550</i> | -1,08 | 1,90E-01 | 4,52E-01 |
| <i>PHYHIPL</i>      | -1,19 | 1,90E-01 | 4,52E-01 |
| <i>GOLPH2</i>       | -1,08 | 1,90E-01 | 4,52E-01 |
| <i>SBF2</i>         | -1,06 | 1,90E-01 | 4,52E-01 |
| <i>THC2379155</i>   | 1,04  | 1,90E-01 | 4,52E-01 |
| <i>MRPS15</i>       | 1,05  | 1,90E-01 | 4,52E-01 |
| <i>CMYA5</i>        | -1,10 | 1,90E-01 | 4,52E-01 |
| <i>ZNF643</i>       | -1,08 | 1,91E-01 | 4,52E-01 |
| <i>ATP4B</i>        | -1,04 | 1,91E-01 | 4,52E-01 |
| <i>SAT2</i>         | -1,05 | 1,91E-01 | 4,53E-01 |
| <i>RPL37P6</i>      | -1,05 | 1,91E-01 | 4,53E-01 |
| <i>A_24_P932385</i> | -1,07 | 1,91E-01 | 4,53E-01 |
| <i>TMEM153</i>      | 1,04  | 1,91E-01 | 4,53E-01 |
| <i>RAB5C</i>        | 1,05  | 1,91E-01 | 4,53E-01 |
| <i>THC2358845</i>   | -1,12 | 1,91E-01 | 4,53E-01 |
| <i>ARSF</i>         | 1,04  | 1,91E-01 | 4,53E-01 |
| <i>ANKRD43</i>      | 1,08  | 1,91E-01 | 4,53E-01 |
| <i>HSPA6</i>        | -1,11 | 1,91E-01 | 4,53E-01 |
| <i>VPS35</i>        | -1,05 | 1,91E-01 | 4,53E-01 |
| <i>WDR5</i>         | 1,06  | 1,91E-01 | 4,53E-01 |
| <i>A_24_P332326</i> | 1,10  | 1,91E-01 | 4,53E-01 |
| <i>PFN4</i>         | -1,06 | 1,91E-01 | 4,53E-01 |
| <i>A_24_P715434</i> | 1,05  | 1,91E-01 | 4,53E-01 |
| <i>GABRP</i>        | 1,07  | 1,91E-01 | 4,53E-01 |
| <i>C6orf15</i>      | 1,04  | 1,91E-01 | 4,53E-01 |
| <i>A_24_P919812</i> | -1,04 | 1,91E-01 | 4,53E-01 |
| <i>CYYR1</i>        | 1,09  | 1,91E-01 | 4,53E-01 |
| <i>NPC2</i>         | -1,07 | 1,91E-01 | 4,53E-01 |
| <i>THC2288797</i>   | -1,07 | 1,91E-01 | 4,53E-01 |
| <i>SMG7</i>         | -1,05 | 1,91E-01 | 4,54E-01 |
| <i>X87895</i>       | 1,06  | 1,91E-01 | 4,54E-01 |
| <i>THC2438709</i>   | -1,08 | 1,91E-01 | 4,54E-01 |
| <i>A_24_P848958</i> | -1,06 | 1,91E-01 | 4,54E-01 |
| <i>EFHC1</i>        | -1,05 | 1,91E-01 | 4,54E-01 |
| <i>LOC647107</i>    | 1,05  | 1,91E-01 | 4,54E-01 |
| <i>TBX5</i>         | 1,05  | 1,91E-01 | 4,54E-01 |
| <i>ADRM1</i>        | 1,05  | 1,91E-01 | 4,54E-01 |

|                        |       |          |          |
|------------------------|-------|----------|----------|
| <i>PDE6D</i>           | 1,05  | 1,91E-01 | 4,54E-01 |
| <i>LOC154822</i>       | 1,06  | 1,91E-01 | 4,54E-01 |
| <i>A_32_P133402</i>    | 1,10  | 1,91E-01 | 4,54E-01 |
| <i>ZNF317</i>          | -1,06 | 1,91E-01 | 4,54E-01 |
| <i>ENST00000314571</i> | -1,06 | 1,92E-01 | 4,54E-01 |
| <i>ZDHHC4</i>          | -1,04 | 1,92E-01 | 4,54E-01 |
| <i>TRAPPC1</i>         | -1,06 | 1,92E-01 | 4,54E-01 |
| <i>NUTF2</i>           | 1,05  | 1,92E-01 | 4,54E-01 |
| <i>TRIM10</i>          | -1,11 | 1,92E-01 | 4,54E-01 |
| <i>A_32_P169142</i>    | -1,07 | 1,92E-01 | 4,54E-01 |
| <i>CA6</i>             | 1,04  | 1,92E-01 | 4,54E-01 |
| <i>CBWD2</i>           | 1,04  | 1,92E-01 | 4,54E-01 |
| <i>DKK3</i>            | 1,08  | 1,92E-01 | 4,54E-01 |
| <i>DOK3</i>            | -1,05 | 1,92E-01 | 4,54E-01 |
| <i>A_24_P924016</i>    | 1,04  | 1,92E-01 | 4,54E-01 |
| <i>A_23_P78975</i>     | -1,10 | 1,92E-01 | 4,54E-01 |
| <i>OR1L4</i>           | 1,03  | 1,92E-01 | 4,54E-01 |
| <i>A_24_P938461</i>    | 1,05  | 1,92E-01 | 4,54E-01 |
| <i>SSX7</i>            | 1,06  | 1,92E-01 | 4,54E-01 |
| <i>A_24_P273043</i>    | 1,05  | 1,92E-01 | 4,54E-01 |
| <i>ENST00000361789</i> | 1,06  | 1,92E-01 | 4,54E-01 |
| <i>SP8</i>             | -1,05 | 1,92E-01 | 4,54E-01 |
| <i>ENST00000338956</i> | 1,05  | 1,92E-01 | 4,54E-01 |
| <i>IL13RA2</i>         | 1,29  | 1,92E-01 | 4,54E-01 |
| <i>MPP6</i>            | -1,06 | 1,92E-01 | 4,54E-01 |
| <i>TMEM34</i>          | -1,04 | 1,92E-01 | 4,54E-01 |
| <i>MLL</i>             | 1,07  | 1,92E-01 | 4,54E-01 |
| <i>C20orf20</i>        | -1,12 | 1,92E-01 | 4,54E-01 |
| <i>A_24_P794189</i>    | -1,05 | 1,92E-01 | 4,55E-01 |
| <i>THC2335681</i>      | -1,05 | 1,92E-01 | 4,55E-01 |
| <i>ATP6V1E1</i>        | 1,05  | 1,92E-01 | 4,55E-01 |
| <i>ALLC</i>            | -1,08 | 1,92E-01 | 4,55E-01 |
| <i>NLC1-C</i>          | 1,05  | 1,92E-01 | 4,55E-01 |
| <i>SLC35B3</i>         | -1,08 | 1,92E-01 | 4,55E-01 |
| <i>SF3B4</i>           | 1,04  | 1,92E-01 | 4,55E-01 |
| <i>CUGBP2</i>          | 1,08  | 1,92E-01 | 4,55E-01 |
| <i>PGRMC2</i>          | 1,04  | 1,92E-01 | 4,55E-01 |
| <i>EYA2</i>            | -1,28 | 1,93E-01 | 4,55E-01 |
| <i>UNC5A</i>           | -1,05 | 1,93E-01 | 4,55E-01 |
| <i>AA471010</i>        | -1,04 | 1,93E-01 | 4,55E-01 |
| <i>KIAA1841</i>        | -1,04 | 1,93E-01 | 4,55E-01 |
| <i>A_24_P761457</i>    | 1,06  | 1,93E-01 | 4,55E-01 |
| <i>THC2250668</i>      | 1,06  | 1,93E-01 | 4,55E-01 |
| <i>THC2317182</i>      | 1,06  | 1,93E-01 | 4,55E-01 |

|                        |       |          |          |
|------------------------|-------|----------|----------|
| <i>BC007841</i>        | 1,07  | 1,93E-01 | 4,55E-01 |
| <i>CDC42EP2</i>        | 1,09  | 1,93E-01 | 4,55E-01 |
| <i>ENST00000372263</i> | 1,15  | 1,93E-01 | 4,55E-01 |
| <i>VPS4B</i>           | -1,05 | 1,93E-01 | 4,55E-01 |
| <i>LOC645843</i>       | 1,08  | 1,93E-01 | 4,55E-01 |
| <i>THC2285010</i>      | -1,08 | 1,93E-01 | 4,55E-01 |
| <i>THC2374741</i>      | 1,10  | 1,93E-01 | 4,55E-01 |
| <i>AJ252276</i>        | -1,08 | 1,93E-01 | 4,55E-01 |
| <i>A_24_P919008</i>    | -1,05 | 1,93E-01 | 4,55E-01 |
| <i>NFKB1</i>           | -1,05 | 1,93E-01 | 4,55E-01 |
| <i>THC2363295</i>      | -1,04 | 1,93E-01 | 4,55E-01 |
| <i>SPAG6</i>           | 1,05  | 1,93E-01 | 4,55E-01 |
| <i>FABP3</i>           | 1,23  | 1,93E-01 | 4,55E-01 |
| <i>TPP1</i>            | -1,06 | 1,93E-01 | 4,55E-01 |
| <i>C9orf135</i>        | 1,04  | 1,93E-01 | 4,55E-01 |
| <i>A_24_P341616</i>    | 1,06  | 1,93E-01 | 4,55E-01 |
| <i>HKR3</i>            | -1,04 | 1,93E-01 | 4,55E-01 |
| <i>ATP2A2</i>          | 1,10  | 1,93E-01 | 4,55E-01 |
| <i>A_24_P607107</i>    | 1,04  | 1,93E-01 | 4,55E-01 |
| <i>A_24_P67408</i>     | -1,05 | 1,93E-01 | 4,55E-01 |
| <i>FLJ00049</i>        | -1,04 | 1,93E-01 | 4,55E-01 |
| <i>CD40</i>            | 1,06  | 1,93E-01 | 4,55E-01 |
| <i>BC043547</i>        | 1,08  | 1,93E-01 | 4,55E-01 |
| <i>CCDC65</i>          | -1,08 | 1,93E-01 | 4,55E-01 |
| <i>C21orf66</i>        | -1,05 | 1,93E-01 | 4,55E-01 |
| <i>COL5A3</i>          | 1,09  | 1,93E-01 | 4,55E-01 |
| <i>KIF2</i>            | -1,05 | 1,93E-01 | 4,56E-01 |
| <i>SEC24B</i>          | -1,06 | 1,93E-01 | 4,56E-01 |
| <i>PFKFB2</i>          | -1,05 | 1,93E-01 | 4,56E-01 |
| <i>THOC1</i>           | -1,06 | 1,93E-01 | 4,56E-01 |
| <i>KIAA0802</i>        | -1,19 | 1,93E-01 | 4,56E-01 |
| <i>THC2379948</i>      | -1,07 | 1,93E-01 | 4,56E-01 |
| <i>ASPSCR1</i>         | 1,05  | 1,93E-01 | 4,56E-01 |
| <i>ZNF665</i>          | -1,06 | 1,93E-01 | 4,56E-01 |
| <i>VPRBP</i>           | 1,03  | 1,93E-01 | 4,56E-01 |
| <i>IL12B</i>           | -1,04 | 1,93E-01 | 4,56E-01 |
| <i>ENST00000382591</i> | -1,07 | 1,94E-01 | 4,56E-01 |
| <i>A_24_P229766</i>    | 1,07  | 1,94E-01 | 4,56E-01 |
| <i>KCNB1</i>           | -1,23 | 1,94E-01 | 4,56E-01 |
| <i>A_24_P944833</i>    | 1,05  | 1,94E-01 | 4,56E-01 |
| <i>ZNF668</i>          | 1,06  | 1,94E-01 | 4,56E-01 |
| <i>ENST00000379204</i> | 1,04  | 1,94E-01 | 4,56E-01 |
| <i>DCP_1_11</i>        | 1,06  | 1,94E-01 | 4,56E-01 |
| <i>MYBL2</i>           | -1,04 | 1,94E-01 | 4,56E-01 |

|                        |       |          |          |
|------------------------|-------|----------|----------|
| <i>CTRL</i>            | 1,05  | 1,94E-01 | 4,56E-01 |
| <i>FGF1</i>            | 1,08  | 1,94E-01 | 4,56E-01 |
| <i>B2M</i>             | -1,07 | 1,94E-01 | 4,56E-01 |
| <i>ENST00000331447</i> | 1,05  | 1,94E-01 | 4,56E-01 |
| <i>THC2405783</i>      | -1,04 | 1,94E-01 | 4,56E-01 |
| <i>FKBP7</i>           | -1,15 | 1,94E-01 | 4,56E-01 |
| <i>THC2334505</i>      | -1,05 | 1,94E-01 | 4,56E-01 |
| <i>CD3E</i>            | -1,04 | 1,94E-01 | 4,56E-01 |
| <i>A_24_P341376</i>    | -1,04 | 1,94E-01 | 4,57E-01 |
| <i>ENST00000383810</i> | 1,06  | 1,94E-01 | 4,57E-01 |
| <i>A_24_P755069</i>    | 1,08  | 1,94E-01 | 4,57E-01 |
| <i>HSD17B6</i>         | -1,25 | 1,94E-01 | 4,57E-01 |
| <i>MGC23280</i>        | -1,05 | 1,94E-01 | 4,57E-01 |
| <i>ITGBL1</i>          | 1,16  | 1,94E-01 | 4,57E-01 |
| <i>BF195168</i>        | 1,04  | 1,94E-01 | 4,57E-01 |
| <i>BTN2A1</i>          | -1,09 | 1,94E-01 | 4,57E-01 |
| <i>PSG11</i>           | 1,04  | 1,94E-01 | 4,57E-01 |
| <i>GPS2</i>            | 1,04  | 1,94E-01 | 4,57E-01 |
| <i>ACSBG2</i>          | 1,05  | 1,94E-01 | 4,57E-01 |
| <i>AK057952</i>        | -1,04 | 1,94E-01 | 4,57E-01 |
| <i>CCBL1</i>           | -1,07 | 1,94E-01 | 4,57E-01 |
| <i>MYCT1</i>           | 1,09  | 1,94E-01 | 4,57E-01 |
| <i>CR602075</i>        | -1,08 | 1,95E-01 | 4,57E-01 |
| <i>DLGAP2</i>          | -1,07 | 1,95E-01 | 4,57E-01 |
| <i>TMEM67</i>          | -1,07 | 1,95E-01 | 4,57E-01 |
| <i>HSPG2</i>           | 1,11  | 1,95E-01 | 4,57E-01 |
| <i>THC2403139</i>      | 1,04  | 1,95E-01 | 4,57E-01 |
| <i>ENST00000330044</i> | 1,10  | 1,95E-01 | 4,57E-01 |
| <i>FETUB</i>           | 1,08  | 1,95E-01 | 4,57E-01 |
| <i>EIF5A</i>           | 1,10  | 1,95E-01 | 4,57E-01 |
| <i>BX094072</i>        | -1,06 | 1,95E-01 | 4,57E-01 |
| <i>LOC285711</i>       | 1,08  | 1,95E-01 | 4,57E-01 |
| <i>ENST00000292562</i> | -1,07 | 1,95E-01 | 4,58E-01 |
| <i>PRO2964</i>         | 1,05  | 1,95E-01 | 4,58E-01 |
| <i>HSPC023</i>         | 1,05  | 1,95E-01 | 4,58E-01 |
| <i>SPRR4</i>           | -1,06 | 1,95E-01 | 4,58E-01 |
| <i>THC2340568</i>      | 1,04  | 1,95E-01 | 4,58E-01 |
| <i>ZNF577</i>          | -1,07 | 1,95E-01 | 4,58E-01 |
| <i>HIGD2A</i>          | 1,06  | 1,95E-01 | 4,58E-01 |
| <i>ZNF142</i>          | -1,05 | 1,95E-01 | 4,58E-01 |
| <i>C8ORFK29</i>        | 1,04  | 1,95E-01 | 4,58E-01 |
| <i>ENST00000319426</i> | 1,09  | 1,95E-01 | 4,58E-01 |
| <i>LOC158402</i>       | -1,07 | 1,95E-01 | 4,58E-01 |
| <i>STYXL1</i>          | -1,05 | 1,95E-01 | 4,58E-01 |

|                        |       |          |          |
|------------------------|-------|----------|----------|
| <i>NEU4</i>            | 1,05  | 1,95E-01 | 4,58E-01 |
| <i>KIF5A</i>           | 1,05  | 1,95E-01 | 4,58E-01 |
| <i>AL834140</i>        | 1,06  | 1,95E-01 | 4,58E-01 |
| <i>AK026896</i>        | 1,13  | 1,95E-01 | 4,58E-01 |
| <i>TMEM130</i>         | 1,17  | 1,95E-01 | 4,58E-01 |
| <i>ZAR1</i>            | -1,10 | 1,95E-01 | 4,58E-01 |
| <i>A_24_P169807</i>    | 1,04  | 1,95E-01 | 4,58E-01 |
| <i>THC2447059</i>      | 1,07  | 1,95E-01 | 4,58E-01 |
| <i>AA905316</i>        | 1,07  | 1,95E-01 | 4,58E-01 |
| <i>WBSCR1</i>          | -1,05 | 1,95E-01 | 4,58E-01 |
| <i>A_24_P722248</i>    | 1,05  | 1,95E-01 | 4,58E-01 |
| <i>MRPL10</i>          | -1,06 | 1,96E-01 | 4,58E-01 |
| <i>SPIC</i>            | 1,06  | 1,96E-01 | 4,58E-01 |
| <i>THC2409355</i>      | -1,05 | 1,96E-01 | 4,58E-01 |
| <i>THC2269852</i>      | -1,05 | 1,96E-01 | 4,58E-01 |
| <i>MLLT1</i>           | 1,04  | 1,96E-01 | 4,59E-01 |
| <i>AW386276</i>        | 1,05  | 1,96E-01 | 4,59E-01 |
| <i>BCAP29</i>          | 1,08  | 1,96E-01 | 4,59E-01 |
| <i>BCKDHB</i>          | 1,05  | 1,96E-01 | 4,59E-01 |
| <i>MPPED2</i>          | -1,12 | 1,96E-01 | 4,59E-01 |
| <i>CXorf56</i>         | 1,04  | 1,96E-01 | 4,59E-01 |
| <i>AF119887</i>        | 1,05  | 1,96E-01 | 4,59E-01 |
| <i>THC2287925</i>      | -1,06 | 1,96E-01 | 4,59E-01 |
| <i>A_23_P130187</i>    | -1,12 | 1,96E-01 | 4,59E-01 |
| <i>LOC392979</i>       | -1,05 | 1,96E-01 | 4,59E-01 |
| <i>PPP1CA</i>          | 1,04  | 1,96E-01 | 4,59E-01 |
| <i>ST6GALNAC1</i>      | 1,09  | 1,96E-01 | 4,59E-01 |
| <i>THC2315916</i>      | 1,05  | 1,96E-01 | 4,59E-01 |
| <i>CD226</i>           | -1,06 | 1,96E-01 | 4,59E-01 |
| <i>KIAA1008</i>        | 1,04  | 1,96E-01 | 4,59E-01 |
| <i>GPR173</i>          | 1,05  | 1,96E-01 | 4,59E-01 |
| <i>A_32_P119493</i>    | 1,06  | 1,96E-01 | 4,59E-01 |
| <i>FANCE</i>           | -1,06 | 1,96E-01 | 4,59E-01 |
| <i>AF116677</i>        | 1,12  | 1,96E-01 | 4,59E-01 |
| <i>RHBDL3</i>          | 1,23  | 1,96E-01 | 4,59E-01 |
| <i>AMDHD2</i>          | 1,07  | 1,96E-01 | 4,59E-01 |
| <i>TUBE1</i>           | -1,06 | 1,96E-01 | 4,59E-01 |
| <i>ENST00000333503</i> | 1,04  | 1,96E-01 | 4,59E-01 |
| <i>C10orf97</i>        | 1,05  | 1,96E-01 | 4,59E-01 |
| <i>SLCO5A1</i>         | 1,06  | 1,96E-01 | 4,59E-01 |
| <i>BC013792</i>        | 1,10  | 1,96E-01 | 4,60E-01 |
| <i>THC2428671</i>      | -1,09 | 1,97E-01 | 4,60E-01 |
| <i>BC034574</i>        | -1,06 | 1,97E-01 | 4,60E-01 |
| <i>TAS2R43</i>         | -1,06 | 1,97E-01 | 4,60E-01 |

|                      |       |          |          |
|----------------------|-------|----------|----------|
| <i>CCDC57</i>        | -1,05 | 1,97E-01 | 4,60E-01 |
| <i>AF116651</i>      | 1,04  | 1,97E-01 | 4,60E-01 |
| <i>BG719281</i>      | 1,05  | 1,96E-01 | 4,60E-01 |
| <i>C8orf37</i>       | 1,05  | 1,97E-01 | 4,60E-01 |
| <i>AF040248</i>      | 1,06  | 1,97E-01 | 4,60E-01 |
| <i>LOC646990</i>     | 1,14  | 1,97E-01 | 4,60E-01 |
| <i>A_24_P930469</i>  | 1,06  | 1,97E-01 | 4,60E-01 |
| <i>CLCF1</i>         | 1,16  | 1,97E-01 | 4,60E-01 |
| <i>THC2282164</i>    | -1,05 | 1,97E-01 | 4,60E-01 |
| <i>THC2290251</i>    | -1,12 | 1,97E-01 | 4,60E-01 |
| <i>CUGBP1</i>        | -1,06 | 1,97E-01 | 4,60E-01 |
| <i>THC2397757</i>    | -1,06 | 1,97E-01 | 4,60E-01 |
| <i>MPG</i>           | 1,04  | 1,97E-01 | 4,60E-01 |
| <i>THC2306650</i>    | 1,09  | 1,97E-01 | 4,60E-01 |
| <i>A_32_P80951</i>   | -1,05 | 1,97E-01 | 4,60E-01 |
| <i>SUHW1</i>         | -1,09 | 1,97E-01 | 4,60E-01 |
| <i>BC062739</i>      | -1,05 | 1,97E-01 | 4,60E-01 |
| <i>TBL1XR1</i>       | -1,05 | 1,97E-01 | 4,60E-01 |
| <i>MX1</i>           | 1,14  | 1,97E-01 | 4,60E-01 |
| <i>A_32_P158543</i>  | 1,05  | 1,97E-01 | 4,60E-01 |
| <i>X75962</i>        | -1,07 | 1,97E-01 | 4,60E-01 |
| <i>IGFBP5</i>        | -1,22 | 1,97E-01 | 4,60E-01 |
| <i>FUBP3</i>         | -1,05 | 1,97E-01 | 4,60E-01 |
| <i>SPG7</i>          | -1,05 | 1,97E-01 | 4,60E-01 |
| <i>AK095488</i>      | 1,04  | 1,97E-01 | 4,60E-01 |
| <i>FAM81B</i>        | -1,06 | 1,97E-01 | 4,61E-01 |
| <i>A_32_P173122</i>  | -1,05 | 1,97E-01 | 4,61E-01 |
| <i>AK091547</i>      | 1,04  | 1,97E-01 | 4,61E-01 |
| <i>BX448200</i>      | 1,04  | 1,97E-01 | 4,61E-01 |
| <i>SELM</i>          | 1,06  | 1,97E-01 | 4,61E-01 |
| <i>U50536</i>        | 1,06  | 1,97E-01 | 4,61E-01 |
| <i>BC032091</i>      | 1,07  | 1,97E-01 | 4,61E-01 |
| <i>MYH13</i>         | 1,07  | 1,97E-01 | 4,61E-01 |
| <i>MAGEA12</i>       | -1,05 | 1,97E-01 | 4,61E-01 |
| <i>THC2406964</i>    | -1,06 | 1,97E-01 | 4,61E-01 |
| <i>DKFZp779M0652</i> | 1,10  | 1,98E-01 | 4,61E-01 |
| <i>A_24_P238616</i>  | 1,15  | 1,98E-01 | 4,61E-01 |
| <i>AK096231</i>      | -1,06 | 1,98E-01 | 4,61E-01 |
| <i>A_24_P144149</i>  | -1,06 | 1,98E-01 | 4,61E-01 |
| <i>AK123079</i>      | -1,05 | 1,98E-01 | 4,61E-01 |
| <i>FLJ20581</i>      | 1,09  | 1,98E-01 | 4,61E-01 |
| <i>ARL1</i>          | -1,05 | 1,98E-01 | 4,61E-01 |
| <i>CCDC94</i>        | 1,05  | 1,98E-01 | 4,61E-01 |
| <i>NYREN18</i>       | 1,04  | 1,98E-01 | 4,61E-01 |



|                        |       |          |          |
|------------------------|-------|----------|----------|
| <i>A_24_P204334</i>    | 1,05  | 1,98E-01 | 4,61E-01 |
| <i>ZFYVE20</i>         | -1,04 | 1,98E-01 | 4,61E-01 |
| <i>AF074994</i>        | -1,05 | 1,98E-01 | 4,61E-01 |
| <i>KRT14</i>           | 1,45  | 1,98E-01 | 4,61E-01 |
| <i>SLC19A1</i>         | -1,04 | 1,98E-01 | 4,61E-01 |
| <i>ENST00000369158</i> | 1,08  | 1,98E-01 | 4,61E-01 |
| <i>NFAT5</i>           | -1,06 | 1,98E-01 | 4,61E-01 |
| <i>RP3-402G11.5</i>    | -1,05 | 1,98E-01 | 4,61E-01 |
| <i>BC007817</i>        | -1,04 | 1,98E-01 | 4,61E-01 |
| <i>KRTAP9-2</i>        | 1,06  | 1,98E-01 | 4,61E-01 |
| <i>THC2266436</i>      | 1,08  | 1,98E-01 | 4,61E-01 |
| <i>BU160948</i>        | 1,18  | 1,98E-01 | 4,61E-01 |
| <i>LAPTM4B</i>         | -1,07 | 1,98E-01 | 4,61E-01 |
| <i>HOXD3</i>           | -1,09 | 1,98E-01 | 4,62E-01 |
| <i>A_23_P96017</i>     | 1,05  | 1,98E-01 | 4,62E-01 |
| <i>UBE2L3</i>          | 1,04  | 1,98E-01 | 4,62E-01 |
| <i>EXOSC7</i>          | -1,04 | 1,98E-01 | 4,62E-01 |
| <i>A_24_P213144</i>    | 1,06  | 1,98E-01 | 4,62E-01 |
| <i>CA307890</i>        | 1,11  | 1,98E-01 | 4,62E-01 |
| <i>A_24_P796428</i>    | 1,09  | 1,98E-01 | 4,62E-01 |
| <i>ENST00000369043</i> | -1,07 | 1,99E-01 | 4,62E-01 |
| <i>GLUL</i>            | -1,09 | 1,99E-01 | 4,62E-01 |
| <i>ZIM3</i>            | 1,03  | 1,99E-01 | 4,62E-01 |
| <i>CLUAP1</i>          | -1,06 | 1,99E-01 | 4,62E-01 |
| <i>MOSPD1</i>          | -1,08 | 1,99E-01 | 4,62E-01 |
| <i>MGC35308</i>        | 1,05  | 1,99E-01 | 4,62E-01 |
| <i>NP1165618</i>       | -1,06 | 1,99E-01 | 4,62E-01 |
| <i>CYP4F3</i>          | -1,05 | 1,99E-01 | 4,62E-01 |
| <i>LOC646663</i>       | 1,04  | 1,99E-01 | 4,62E-01 |
| <i>ANKRD33</i>         | 1,05  | 1,99E-01 | 4,62E-01 |
| <i>BI911851</i>        | -1,05 | 1,99E-01 | 4,63E-01 |
| <i>ACYP2</i>           | 1,06  | 1,99E-01 | 4,63E-01 |
| <i>SRGAP2</i>          | -1,07 | 1,99E-01 | 4,63E-01 |
| <i>DHPS</i>            | 1,06  | 1,99E-01 | 4,63E-01 |
| <i>A_23_P395321</i>    | 1,06  | 1,99E-01 | 4,63E-01 |
| <i>HNRPA1</i>          | -1,04 | 1,99E-01 | 4,63E-01 |
| <i>THC2406095</i>      | 1,05  | 2,00E-01 | 4,64E-01 |
| <i>PLA1A</i>           | -1,14 | 2,00E-01 | 4,64E-01 |
| <i>ENST00000344265</i> | 1,04  | 2,00E-01 | 4,64E-01 |
| <i>PDZRN4</i>          | -1,21 | 2,00E-01 | 4,64E-01 |
| <i>AA132288</i>        | -1,07 | 2,00E-01 | 4,64E-01 |
| <i>AX781433</i>        | -1,16 | 2,00E-01 | 4,64E-01 |
| <i>THC2303284</i>      | -1,07 | 2,00E-01 | 4,64E-01 |
| <i>CYP7B1</i>          | 1,11  | 2,00E-01 | 4,64E-01 |

|                 |       |          |          |
|-----------------|-------|----------|----------|
| CR626222        | -1,06 | 2,00E-01 | 4,64E-01 |
| COP1            | -1,07 | 2,00E-01 | 4,64E-01 |
| RNF125          | 1,10  | 2,00E-01 | 4,64E-01 |
| ENST00000372045 | -1,41 | 2,00E-01 | 4,64E-01 |
| ENST00000252482 | -1,11 | 2,00E-01 | 4,64E-01 |
| A_23_P43977     | -1,11 | 2,00E-01 | 4,64E-01 |
| TLR5            | -1,10 | 2,00E-01 | 4,64E-01 |
| BQ223486        | -1,05 | 2,00E-01 | 4,64E-01 |
| DEADC1          | -1,05 | 2,00E-01 | 4,64E-01 |
| AK123083        | -1,04 | 2,00E-01 | 4,64E-01 |
| AW028759        | 1,04  | 2,00E-01 | 4,64E-01 |
| A_23_P410456    | 1,04  | 2,00E-01 | 4,64E-01 |
| AL566332        | 1,05  | 2,00E-01 | 4,64E-01 |
| A_24_P894345    | 1,06  | 2,00E-01 | 4,64E-01 |
| LOC374920       | 1,06  | 2,00E-01 | 4,64E-01 |
| LHB             | 1,08  | 2,00E-01 | 4,64E-01 |
| MBD2            | 1,05  | 2,00E-01 | 4,64E-01 |
| PERP            | 1,30  | 2,00E-01 | 4,64E-01 |
| A_32_P15169     | -1,07 | 2,00E-01 | 4,64E-01 |
| AT_nX_5         | 1,03  | 2,00E-01 | 4,64E-01 |
| AY358772        | 1,07  | 2,00E-01 | 4,64E-01 |
| AF130083        | -1,05 | 2,00E-01 | 4,64E-01 |
| LOC400451       | -1,08 | 2,00E-01 | 4,64E-01 |
| PRKAB2          | 1,08  | 2,00E-01 | 4,64E-01 |
| TMEM162         | -1,04 | 2,00E-01 | 4,65E-01 |
| KLF15           | -1,18 | 2,00E-01 | 4,65E-01 |
| RRAGB           | -1,06 | 2,00E-01 | 4,65E-01 |
| PRO1853         | 1,03  | 2,00E-01 | 4,65E-01 |
| THC2415390      | 1,14  | 2,00E-01 | 4,65E-01 |
| ENST00000383097 | -1,12 | 2,01E-01 | 4,65E-01 |
| MCTP2           | -1,05 | 2,01E-01 | 4,65E-01 |
| DHX30           | 1,05  | 2,01E-01 | 4,65E-01 |
| AK123655        | -1,06 | 2,01E-01 | 4,65E-01 |
| A_32_P48329     | 1,03  | 2,01E-01 | 4,65E-01 |
| A_32_P9532      | -1,06 | 2,01E-01 | 4,65E-01 |
| AK000832        | -1,05 | 2,01E-01 | 4,65E-01 |
| CTAGE3          | -1,05 | 2,01E-01 | 4,65E-01 |
| TMEM126A        | 1,05  | 2,01E-01 | 4,65E-01 |
| PDPK1           | -1,05 | 2,01E-01 | 4,65E-01 |
| A_24_P926806    | -1,05 | 2,01E-01 | 4,65E-01 |
| AP3M1           | -1,04 | 2,01E-01 | 4,65E-01 |
| PRR7            | 1,07  | 2,01E-01 | 4,65E-01 |
| KCNQ1           | -1,09 | 2,01E-01 | 4,65E-01 |
| KCNJ3           | -1,28 | 2,01E-01 | 4,65E-01 |

|                        |       |          |          |
|------------------------|-------|----------|----------|
| <i>THC2280735</i>      | 1,04  | 2,01E-01 | 4,65E-01 |
| <i>GLRX2</i>           | 1,04  | 2,01E-01 | 4,66E-01 |
| <i>AK057971</i>        | 1,05  | 2,01E-01 | 4,66E-01 |
| <i>FBXL13</i>          | 1,08  | 2,01E-01 | 4,66E-01 |
| <i>TRIAP1</i>          | -1,05 | 2,01E-01 | 4,66E-01 |
| <i>RHOT1</i>           | -1,05 | 2,01E-01 | 4,66E-01 |
| <i>CR609342</i>        | -1,09 | 2,01E-01 | 4,66E-01 |
| <i>THC2339964</i>      | -1,07 | 2,01E-01 | 4,66E-01 |
| <i>A_24_P923215</i>    | -1,06 | 2,01E-01 | 4,66E-01 |
| <i>BX106126</i>        | -1,05 | 2,01E-01 | 4,66E-01 |
| <i>AK023077</i>        | -1,05 | 2,01E-01 | 4,66E-01 |
| <i>C17orf65</i>        | -1,04 | 2,01E-01 | 4,66E-01 |
| <i>A_24_P912871</i>    | 1,06  | 2,01E-01 | 4,66E-01 |
| <i>TXNRD1</i>          | 1,08  | 2,01E-01 | 4,66E-01 |
| <i>KLHDC4</i>          | -1,06 | 2,01E-01 | 4,66E-01 |
| <i>SNX6</i>            | -1,04 | 2,01E-01 | 4,66E-01 |
| <i>A_24_P916559</i>    | -1,07 | 2,01E-01 | 4,66E-01 |
| <i>SLAMF1</i>          | -1,06 | 2,01E-01 | 4,66E-01 |
| <i>RP4-662A9.2</i>     | 1,05  | 2,01E-01 | 4,66E-01 |
| <i>THC2365796</i>      | 1,08  | 2,01E-01 | 4,66E-01 |
| <i>ENST00000371367</i> | -1,06 | 2,02E-01 | 4,66E-01 |
| <i>RIT2</i>            | -1,07 | 2,02E-01 | 4,66E-01 |
| <i>S71020</i>          | 1,05  | 2,02E-01 | 4,66E-01 |
| <i>ZNF652</i>          | -1,07 | 2,02E-01 | 4,66E-01 |
| <i>FARSLB</i>          | -1,05 | 2,02E-01 | 4,66E-01 |
| <i>RP11-125A7.3</i>    | 1,05  | 2,02E-01 | 4,66E-01 |
| <i>LOC400655</i>       | 1,04  | 2,02E-01 | 4,66E-01 |
| <i>A_32_P173023</i>    | 1,05  | 2,02E-01 | 4,66E-01 |
| <i>PRP2</i>            | 1,04  | 2,02E-01 | 4,66E-01 |
| <i>VPS28</i>           | -1,04 | 2,02E-01 | 4,66E-01 |
| <i>LZTR2</i>           | 1,05  | 2,02E-01 | 4,66E-01 |
| <i>THC2280033</i>      | -1,11 | 2,02E-01 | 4,66E-01 |
| <i>THC2281475</i>      | -1,05 | 2,02E-01 | 4,66E-01 |
| <i>AK001784</i>        | -1,04 | 2,02E-01 | 4,66E-01 |
| <i>FLJ44379</i>        | -1,04 | 2,02E-01 | 4,66E-01 |
| <i>A_24_P247576</i>    | 1,14  | 2,02E-01 | 4,66E-01 |
| <i>ZNF740</i>          | -1,05 | 2,02E-01 | 4,66E-01 |
| <i>DLL3</i>            | -1,04 | 2,02E-01 | 4,66E-01 |
| <i>TSGA13</i>          | 1,05  | 2,02E-01 | 4,66E-01 |
| <i>THC2436815</i>      | 1,05  | 2,02E-01 | 4,66E-01 |
| <i>N48043</i>          | 1,12  | 2,02E-01 | 4,66E-01 |
| <i>ENST00000305423</i> | 1,29  | 2,02E-01 | 4,66E-01 |
| <i>MEA1</i>            | -1,04 | 2,02E-01 | 4,67E-01 |
| <i>BC078172</i>        | -1,04 | 2,02E-01 | 4,67E-01 |

|                        |       |          |          |
|------------------------|-------|----------|----------|
| <i>ENO2</i>            | 1,08  | 2,02E-01 | 4,67E-01 |
| <i>THC2342537</i>      | 1,10  | 2,02E-01 | 4,67E-01 |
| <i>CLCN5</i>           | -1,06 | 2,02E-01 | 4,67E-01 |
| <i>C20orf38</i>        | -1,04 | 2,02E-01 | 4,67E-01 |
| <i>IGHMBP2</i>         | -1,06 | 2,02E-01 | 4,67E-01 |
| <i>MAP4K5</i>          | -1,05 | 2,02E-01 | 4,67E-01 |
| <i>CACNA1B</i>         | 1,04  | 2,02E-01 | 4,67E-01 |
| <i>AKO22204</i>        | 1,06  | 2,02E-01 | 4,67E-01 |
| <i>DDX39</i>           | -1,05 | 2,02E-01 | 4,67E-01 |
| <i>ZNF408</i>          | -1,05 | 2,02E-01 | 4,67E-01 |
| <i>RABGAP1L</i>        | 1,05  | 2,02E-01 | 4,67E-01 |
| <i>EPB41</i>           | 1,05  | 2,03E-01 | 4,67E-01 |
| <i>COL1A1</i>          | -1,29 | 2,03E-01 | 4,67E-01 |
| <i>THC2290079</i>      | -1,06 | 2,03E-01 | 4,67E-01 |
| <i>THC2315509</i>      | -1,04 | 2,03E-01 | 4,67E-01 |
| <i>RHBDD2</i>          | 1,05  | 2,03E-01 | 4,67E-01 |
| <i>HIST1H4K</i>        | 1,09  | 2,03E-01 | 4,67E-01 |
| <i>RPL27</i>           | -1,04 | 2,03E-01 | 4,67E-01 |
| <i>ENST00000310773</i> | 1,07  | 2,03E-01 | 4,67E-01 |
| <i>ZNF556</i>          | -1,06 | 2,03E-01 | 4,67E-01 |
| <i>PCID2</i>           | -1,04 | 2,03E-01 | 4,67E-01 |
| <i>BC056662</i>        | -1,04 | 2,03E-01 | 4,68E-01 |
| <i>JPH1</i>            | -1,06 | 2,03E-01 | 4,68E-01 |
| <i>TSNAX</i>           | -1,04 | 2,03E-01 | 4,68E-01 |
| <i>AKO94167</i>        | 1,04  | 2,03E-01 | 4,68E-01 |
| <i>RPL3L</i>           | 1,04  | 2,03E-01 | 4,68E-01 |
| <i>SBEM</i>            | 1,06  | 2,03E-01 | 4,68E-01 |
| <i>ENST00000317836</i> | -1,10 | 2,03E-01 | 4,68E-01 |
| <i>KCNB2</i>           | 1,10  | 2,03E-01 | 4,68E-01 |
| <i>GNGT2</i>           | -1,05 | 2,03E-01 | 4,68E-01 |
| <i>AKAP5</i>           | -1,04 | 2,03E-01 | 4,68E-01 |
| <i>FOXP3</i>           | 1,05  | 2,03E-01 | 4,68E-01 |
| <i>MORC4</i>           | -1,06 | 2,03E-01 | 4,68E-01 |
| <i>A_24_P246963</i>    | 1,07  | 2,03E-01 | 4,68E-01 |
| <i>AF116686</i>        | 1,12  | 2,03E-01 | 4,68E-01 |
| <i>NPPC</i>            | 1,16  | 2,03E-01 | 4,68E-01 |
| <i>ZNF418</i>          | -1,06 | 2,04E-01 | 4,68E-01 |
| <i>U01925</i>          | -1,40 | 2,04E-01 | 4,69E-01 |
| <i>BRUNOL6</i>         | -1,07 | 2,04E-01 | 4,69E-01 |
| <i>PIP5KL1</i>         | -1,06 | 2,04E-01 | 4,69E-01 |
| <i>MGC45922</i>        | 1,06  | 2,04E-01 | 4,69E-01 |
| <i>ROGDI</i>           | 1,09  | 2,04E-01 | 4,69E-01 |
| <i>MRGPRF</i>          | -1,08 | 2,04E-01 | 4,69E-01 |
| <i>ACTR10</i>          | -1,04 | 2,04E-01 | 4,69E-01 |

|                     |       |          |          |
|---------------------|-------|----------|----------|
| <i>HCN2</i>         | 1,05  | 2,04E-01 | 4,69E-01 |
| <i>AL137668</i>     | -1,05 | 2,04E-01 | 4,69E-01 |
| <i>THC2389887</i>   | 1,05  | 2,04E-01 | 4,69E-01 |
| <i>ANTXR1</i>       | 1,09  | 2,04E-01 | 4,69E-01 |
| <i>A_32_P200429</i> | -1,06 | 2,04E-01 | 4,69E-01 |
| <i>AL519018</i>     | -1,05 | 2,04E-01 | 4,69E-01 |
| <i>THC2333984</i>   | -1,04 | 2,04E-01 | 4,69E-01 |
| <i>KCTD5</i>        | -1,04 | 2,04E-01 | 4,69E-01 |
| <i>C12orf45</i>     | 1,04  | 2,04E-01 | 4,69E-01 |
| <i>BG167701</i>     | 1,06  | 2,04E-01 | 4,69E-01 |
| <i>BX111152</i>     | 1,10  | 2,04E-01 | 4,69E-01 |
| <i>CCDC82</i>       | -1,07 | 2,04E-01 | 4,69E-01 |
| <i>WRN</i>          | -1,04 | 2,04E-01 | 4,70E-01 |
| <i>LARP6</i>        | 1,10  | 2,04E-01 | 4,70E-01 |
| <i>SPRY3</i>        | 1,03  | 2,04E-01 | 4,70E-01 |
| <i>A_32_P69379</i>  | 1,07  | 2,04E-01 | 4,70E-01 |
| <i>FLJ10324</i>     | 1,08  | 2,05E-01 | 4,70E-01 |
| <i>SENP1</i>        | -1,04 | 2,05E-01 | 4,70E-01 |
| <i>C1QDC1</i>       | -1,05 | 2,05E-01 | 4,70E-01 |
| <i>ADSSL1</i>       | 1,09  | 2,05E-01 | 4,70E-01 |
| <i>THC2337957</i>   | 1,04  | 2,05E-01 | 4,70E-01 |
| <i>THC2277046</i>   | -1,04 | 2,05E-01 | 4,70E-01 |
| <i>SERHL2</i>       | -1,09 | 2,05E-01 | 4,70E-01 |
| <i>KLHL3</i>        | -1,09 | 2,05E-01 | 4,70E-01 |
| <i>BX105435</i>     | -1,04 | 2,05E-01 | 4,70E-01 |
| <i>WDR70</i>        | 1,04  | 2,05E-01 | 4,70E-01 |
| <i>SSRP1</i>        | -1,03 | 2,05E-01 | 4,70E-01 |
| <i>TENC1</i>        | 1,08  | 2,05E-01 | 4,70E-01 |
| <i>AU148042</i>     | 1,06  | 2,05E-01 | 4,70E-01 |
| <i>TULP1</i>        | -1,07 | 2,05E-01 | 4,71E-01 |
| <i>C11orf17</i>     | -1,06 | 2,05E-01 | 4,71E-01 |
| <i>DRG2</i>         | -1,03 | 2,05E-01 | 4,71E-01 |
| <i>AF119849</i>     | 1,05  | 2,05E-01 | 4,71E-01 |
| <i>MGAT4B</i>       | 1,05  | 2,05E-01 | 4,71E-01 |
| <i>JAK3</i>         | -1,10 | 2,05E-01 | 4,71E-01 |
| <i>AA412217</i>     | -1,07 | 2,05E-01 | 4,71E-01 |
| <i>ADAMTSL4</i>     | -1,06 | 2,05E-01 | 4,71E-01 |
| <i>BX094773</i>     | 1,07  | 2,05E-01 | 4,71E-01 |
| <i>A_32_P144452</i> | -1,06 | 2,05E-01 | 4,71E-01 |
| <i>PDGFRA</i>       | -1,15 | 2,05E-01 | 4,71E-01 |
| <i>BHLHB3</i>       | -1,14 | 2,05E-01 | 4,71E-01 |
| <i>CBFB</i>         | -1,05 | 2,05E-01 | 4,71E-01 |
| <i>LCORL</i>        | -1,04 | 2,05E-01 | 4,71E-01 |
| <i>MGC72075</i>     | 1,06  | 2,05E-01 | 4,71E-01 |

|                        |       |          |          |
|------------------------|-------|----------|----------|
| <i>SHCBP1</i>          | -1,05 | 2,05E-01 | 4,71E-01 |
| <i>SITPEC</i>          | 1,04  | 2,05E-01 | 4,71E-01 |
| <i>SUCLG2</i>          | 1,07  | 2,06E-01 | 4,71E-01 |
| <i>THC2320431</i>      | 1,05  | 2,06E-01 | 4,71E-01 |
| <i>RAPGEF6</i>         | -1,06 | 2,06E-01 | 4,71E-01 |
| <i>SCN4A</i>           | 1,07  | 2,06E-01 | 4,71E-01 |
| <i>A_23_P208752</i>    | -1,05 | 2,06E-01 | 4,71E-01 |
| <i>NALP5</i>           | -1,05 | 2,06E-01 | 4,71E-01 |
| <i>BU678397</i>        | -1,05 | 2,06E-01 | 4,71E-01 |
| <i>GIF</i>             | 1,05  | 2,06E-01 | 4,71E-01 |
| <i>AIM2</i>            | -1,09 | 2,06E-01 | 4,72E-01 |
| <i>MED4</i>            | -1,05 | 2,06E-01 | 4,72E-01 |
| <i>C22orf25</i>        | 1,03  | 2,06E-01 | 4,72E-01 |
| <i>BM819787</i>        | -1,06 | 2,06E-01 | 4,72E-01 |
| <i>SYNGR3</i>          | 1,05  | 2,06E-01 | 4,72E-01 |
| <i>TALDO1</i>          | -1,04 | 2,06E-01 | 4,72E-01 |
| <i>KCNS2</i>           | 1,08  | 2,06E-01 | 4,72E-01 |
| <i>FAM45B</i>          | -1,07 | 2,06E-01 | 4,72E-01 |
| <i>BUD13</i>           | -1,05 | 2,06E-01 | 4,72E-01 |
| <i>RPS25</i>           | -1,04 | 2,06E-01 | 4,72E-01 |
| <i>AI906074</i>        | 1,08  | 2,06E-01 | 4,72E-01 |
| <i>SLC31A2</i>         | 1,11  | 2,06E-01 | 4,72E-01 |
| <i>ENST00000355854</i> | 1,14  | 2,06E-01 | 4,72E-01 |
| <i>ATG16L2</i>         | -1,08 | 2,06E-01 | 4,72E-01 |
| <i>TSPY2</i>           | -1,05 | 2,06E-01 | 4,72E-01 |
| <i>HECTD1</i>          | -1,05 | 2,06E-01 | 4,72E-01 |
| <i>LYPLAL1</i>         | 1,04  | 2,06E-01 | 4,72E-01 |
| <i>ENST00000334770</i> | 1,30  | 2,06E-01 | 4,72E-01 |
| <i>RING1</i>           | -1,05 | 2,06E-01 | 4,72E-01 |
| <i>ZFX4</i>            | -1,11 | 2,06E-01 | 4,72E-01 |
| <i>THC2443960</i>      | -1,04 | 2,06E-01 | 4,72E-01 |
| <i>A_24_P845631</i>    | -1,13 | 2,07E-01 | 4,72E-01 |
| <i>ENST00000334562</i> | -1,07 | 2,07E-01 | 4,72E-01 |
| <i>BC007917</i>        | -1,04 | 2,07E-01 | 4,72E-01 |
| <i>AF086790</i>        | 1,06  | 2,07E-01 | 4,72E-01 |
| <i>HHLA3</i>           | -1,06 | 2,07E-01 | 4,73E-01 |
| <i>ZNF703</i>          | 1,05  | 2,07E-01 | 4,73E-01 |
| <i>FMNL2</i>           | -1,07 | 2,07E-01 | 4,73E-01 |
| <i>THC2279734</i>      | 1,09  | 2,07E-01 | 4,73E-01 |
| <i>DNAJC16</i>         | -1,04 | 2,07E-01 | 4,73E-01 |
| <i>AA436686</i>        | -1,08 | 2,07E-01 | 4,73E-01 |
| <i>ARMC1</i>           | 1,05  | 2,07E-01 | 4,73E-01 |
| <i>TYR</i>             | 1,03  | 2,07E-01 | 4,73E-01 |
| <i>SEC24A</i>          | 1,05  | 2,07E-01 | 4,73E-01 |

|                     |       |          |          |
|---------------------|-------|----------|----------|
| <i>ECHDC3</i>       | -1,09 | 2,07E-01 | 4,73E-01 |
| <i>TRIM3</i>        | -1,04 | 2,07E-01 | 4,73E-01 |
| <i>HSPC048</i>      | 1,05  | 2,07E-01 | 4,73E-01 |
| <i>SLC37A3</i>      | -1,07 | 2,07E-01 | 4,73E-01 |
| <i>BE694329</i>     | 1,05  | 2,07E-01 | 4,73E-01 |
| <i>AK130911</i>     | -1,28 | 2,07E-01 | 4,73E-01 |
| <i>LOC283663</i>    | -1,11 | 2,07E-01 | 4,73E-01 |
| <i>MYO1F</i>        | -1,07 | 2,07E-01 | 4,73E-01 |
| <i>CHD5</i>         | 1,04  | 2,07E-01 | 4,73E-01 |
| <i>AK024372</i>     | -1,04 | 2,07E-01 | 4,74E-01 |
| <i>A_24_P843309</i> | 1,05  | 2,07E-01 | 4,74E-01 |
| <i>SHMT1</i>        | -1,09 | 2,08E-01 | 4,74E-01 |
| <i>ABHD14A</i>      | -1,06 | 2,08E-01 | 4,74E-01 |
| <i>AI830766</i>     | -1,07 | 2,08E-01 | 4,74E-01 |
| <i>RPL37A</i>       | -1,05 | 2,08E-01 | 4,74E-01 |
| <i>THC2369600</i>   | -1,06 | 2,08E-01 | 4,74E-01 |
| <i>TGM1</i>         | -1,32 | 2,08E-01 | 4,74E-01 |
| <i>PCDHB19P</i>     | -1,05 | 2,08E-01 | 4,74E-01 |
| <i>KRTAP13-2</i>    | 1,04  | 2,08E-01 | 4,74E-01 |
| <i>NPAS2</i>        | 1,07  | 2,08E-01 | 4,74E-01 |
| <i>A_32_P78164</i>  | 1,08  | 2,08E-01 | 4,74E-01 |
| <i>TNAP</i>         | -1,05 | 2,08E-01 | 4,74E-01 |
| <i>BF870807</i>     | 1,04  | 2,08E-01 | 4,74E-01 |
| <i>CPA6</i>         | 1,06  | 2,08E-01 | 4,74E-01 |
| <i>LOC338809</i>    | 1,05  | 2,08E-01 | 4,74E-01 |
| <i>FAM76A</i>       | 1,05  | 2,08E-01 | 4,75E-01 |
| <i>SLC25A26</i>     | 1,06  | 2,08E-01 | 4,75E-01 |
| <i>ADAM2</i>        | 1,04  | 2,08E-01 | 4,75E-01 |
| <i>PEX6</i>         | -1,12 | 2,08E-01 | 4,75E-01 |
| <i>PRDX3</i>        | -1,09 | 2,08E-01 | 4,75E-01 |
| <i>LOC440132</i>    | -1,05 | 2,08E-01 | 4,75E-01 |
| <i>UBE2M</i>        | 1,05  | 2,08E-01 | 4,75E-01 |
| <i>LOC645431</i>    | 1,05  | 2,08E-01 | 4,75E-01 |
| <i>CKM</i>          | 1,08  | 2,08E-01 | 4,75E-01 |
| <i>A_24_P118946</i> | 1,10  | 2,08E-01 | 4,75E-01 |
| <i>ASB5</i>         | 1,37  | 2,08E-01 | 4,75E-01 |
| <i>AK129956</i>     | -1,07 | 2,08E-01 | 4,75E-01 |
| <i>A_23_P256973</i> | -1,05 | 2,08E-01 | 4,75E-01 |
| <i>MCM3AP</i>       | -1,04 | 2,08E-01 | 4,75E-01 |
| <i>GLTP</i>         | 1,11  | 2,09E-01 | 4,75E-01 |
| <i>SLC25A22</i>     | -1,11 | 2,09E-01 | 4,75E-01 |
| <i>M62303</i>       | -1,06 | 2,09E-01 | 4,75E-01 |
| <i>AB088847</i>     | 1,04  | 2,09E-01 | 4,75E-01 |
| <i>AK094114</i>     | -1,04 | 2,09E-01 | 4,75E-01 |

|                        |       |          |          |
|------------------------|-------|----------|----------|
| <i>CB993898</i>        | 1,07  | 2,09E-01 | 4,75E-01 |
| <i>TLN2</i>            | -1,08 | 2,09E-01 | 4,75E-01 |
| <i>UPF2</i>            | 1,07  | 2,09E-01 | 4,75E-01 |
| <i>LSM1</i>            | 1,05  | 2,09E-01 | 4,75E-01 |
| <i>IL20RA</i>          | -1,18 | 2,09E-01 | 4,76E-01 |
| <i>MMP14</i>           | 1,10  | 2,09E-01 | 4,76E-01 |
| <i>PRPF3</i>           | -1,04 | 2,09E-01 | 4,76E-01 |
| <i>SLC16A12</i>        | -1,07 | 2,09E-01 | 4,76E-01 |
| <i>RTEL1</i>           | 1,05  | 2,09E-01 | 4,76E-01 |
| <i>POU6F2</i>          | -1,05 | 2,09E-01 | 4,76E-01 |
| <i>SAPS2</i>           | -1,04 | 2,09E-01 | 4,76E-01 |
| <i>AK055821</i>        | 1,09  | 2,09E-01 | 4,76E-01 |
| <i>AA714039</i>        | -1,05 | 2,09E-01 | 4,76E-01 |
| <i>RNF31</i>           | -1,04 | 2,09E-01 | 4,76E-01 |
| <i>A_24_P930677</i>    | -1,04 | 2,09E-01 | 4,76E-01 |
| <i>LOC199725</i>       | 1,05  | 2,09E-01 | 4,76E-01 |
| <i>RGS10</i>           | 1,10  | 2,09E-01 | 4,76E-01 |
| <i>NFRKB</i>           | -1,05 | 2,09E-01 | 4,76E-01 |
| <i>PTP4A1</i>          | 1,07  | 2,09E-01 | 4,76E-01 |
| <i>DCTN2</i>           | 1,04  | 2,09E-01 | 4,76E-01 |
| <i>AF086375</i>        | 1,05  | 2,09E-01 | 4,76E-01 |
| <i>AKAP1</i>           | 1,08  | 2,09E-01 | 4,76E-01 |
| <i>WDR68</i>           | -1,03 | 2,09E-01 | 4,76E-01 |
| <i>GALNTL2</i>         | 1,23  | 2,09E-01 | 4,76E-01 |
| <i>C1QC</i>            | -1,11 | 2,09E-01 | 4,76E-01 |
| <i>ENST00000315478</i> | 1,04  | 2,10E-01 | 4,76E-01 |
| <i>THC2312711</i>      | 1,05  | 2,10E-01 | 4,76E-01 |
| <i>C2orf15</i>         | -1,06 | 2,10E-01 | 4,76E-01 |
| <i>ADCK4</i>           | 1,04  | 2,10E-01 | 4,77E-01 |
| <i>ENST00000307437</i> | -1,05 | 2,10E-01 | 4,77E-01 |
| <i>FLJ40869</i>        | -1,04 | 2,10E-01 | 4,77E-01 |
| <i>APC</i>             | -1,04 | 2,10E-01 | 4,77E-01 |
| <i>NEUROG2</i>         | 1,05  | 2,10E-01 | 4,77E-01 |
| <i>RIF1</i>            | 1,05  | 2,10E-01 | 4,77E-01 |
| <i>C20orf106</i>       | 1,06  | 2,10E-01 | 4,77E-01 |
| <i>MAF1</i>            | 1,07  | 2,10E-01 | 4,77E-01 |
| <i>TMEM49</i>          | 1,15  | 2,10E-01 | 4,77E-01 |
| <i>PTPRD</i>           | 1,17  | 2,10E-01 | 4,77E-01 |
| <i>A_24_P828054</i>    | -1,06 | 2,10E-01 | 4,77E-01 |
| <i>LOC285074</i>       | 1,06  | 2,10E-01 | 4,77E-01 |
| <i>STK40</i>           | 1,08  | 2,10E-01 | 4,77E-01 |
| <i>CD164</i>           | -1,06 | 2,10E-01 | 4,77E-01 |
| <i>EMILIN1</i>         | -1,11 | 2,10E-01 | 4,77E-01 |
| <i>A_24_P916331</i>    | -1,05 | 2,10E-01 | 4,77E-01 |



|                        |       |          |          |
|------------------------|-------|----------|----------|
| <i>ENST00000338660</i> | 1,14  | 2,10E-01 | 4,77E-01 |
| <i>A_32_P46954</i>     | -1,04 | 2,10E-01 | 4,77E-01 |
| <i>THC2404646</i>      | 1,06  | 2,10E-01 | 4,77E-01 |
| <i>MFN2</i>            | 1,09  | 2,10E-01 | 4,77E-01 |
| <i>D4ST1</i>           | -1,04 | 2,10E-01 | 4,77E-01 |
| <i>BX108510</i>        | -1,04 | 2,10E-01 | 4,77E-01 |
| <i>B3GALT6</i>         | -1,05 | 2,10E-01 | 4,77E-01 |
| <i>ZNF576</i>          | -1,04 | 2,10E-01 | 4,77E-01 |
| <i>THC2281382</i>      | 1,05  | 2,10E-01 | 4,77E-01 |
| <i>SORL1</i>           | -1,13 | 2,10E-01 | 4,78E-01 |
| <i>ENST00000375590</i> | 1,03  | 2,10E-01 | 4,78E-01 |
| <i>HMGB4</i>           | 1,05  | 2,10E-01 | 4,78E-01 |
| <i>SLC5A5</i>          | 1,04  | 2,11E-01 | 4,78E-01 |
| <i>AL050206</i>        | -1,06 | 2,11E-01 | 4,78E-01 |
| <i>E2F1</i>            | -1,04 | 2,11E-01 | 4,78E-01 |
| <i>CNNM3</i>           | 1,08  | 2,11E-01 | 4,78E-01 |
| <i>LOC152573</i>       | -1,21 | 2,11E-01 | 4,78E-01 |
| <i>ANKS1A</i>          | -1,07 | 2,11E-01 | 4,78E-01 |
| <i>ZBTB5</i>           | 1,05  | 2,11E-01 | 4,78E-01 |
| <i>CXX1</i>            | -1,06 | 2,11E-01 | 4,78E-01 |
| <i>A_23_P84272</i>     | -1,05 | 2,11E-01 | 4,78E-01 |
| <i>A_32_P105865</i>    | 1,08  | 2,11E-01 | 4,78E-01 |
| <i>A_24_P473972</i>    | -1,08 | 2,11E-01 | 4,78E-01 |
| <i>BX104999</i>        | -1,07 | 2,11E-01 | 4,78E-01 |
| <i>ZFYVE19</i>         | -1,07 | 2,11E-01 | 4,78E-01 |
| <i>BC052334</i>        | -1,06 | 2,11E-01 | 4,78E-01 |
| <i>MUTYH</i>           | -1,05 | 2,11E-01 | 4,78E-01 |
| <i>THC2364821</i>      | -1,05 | 2,11E-01 | 4,78E-01 |
| <i>ZNF562</i>          | -1,04 | 2,11E-01 | 4,78E-01 |
| <i>CENPT</i>           | 1,04  | 2,11E-01 | 4,78E-01 |
| <i>BBX</i>             | 1,05  | 2,11E-01 | 4,78E-01 |
| <i>LOXL2</i>           | 1,10  | 2,11E-01 | 4,78E-01 |
| <i>FLJ90650</i>        | -1,21 | 2,11E-01 | 4,78E-01 |
| <i>PGM2</i>            | -1,08 | 2,11E-01 | 4,78E-01 |
| <i>A_24_P16353</i>     | 1,04  | 2,11E-01 | 4,78E-01 |
| <i>A_24_P76694</i>     | 1,05  | 2,11E-01 | 4,78E-01 |
| <i>THC2315244</i>      | 1,07  | 2,11E-01 | 4,78E-01 |
| <i>RBM18</i>           | 1,07  | 2,11E-01 | 4,78E-01 |
| <i>RP2</i>             | 1,07  | 2,11E-01 | 4,78E-01 |
| <i>WASF3</i>           | -1,06 | 2,11E-01 | 4,78E-01 |
| <i>A_24_P565626</i>    | -1,04 | 2,11E-01 | 4,78E-01 |
| <i>THC2374802</i>      | -1,07 | 2,11E-01 | 4,78E-01 |
| <i>LOC389791</i>       | -1,06 | 2,11E-01 | 4,78E-01 |
| <i>OR6Y1</i>           | 1,05  | 2,11E-01 | 4,78E-01 |

|                        |       |          |          |
|------------------------|-------|----------|----------|
| <i>ENST00000263956</i> | -1,05 | 2,11E-01 | 4,78E-01 |
| <i>ZNF547</i>          | -1,07 | 2,11E-01 | 4,79E-01 |
| <i>THC2304761</i>      | 1,04  | 2,11E-01 | 4,79E-01 |
| <i>A_24_P571824</i>    | 1,06  | 2,11E-01 | 4,79E-01 |
| <i>C6orf103</i>        | -1,04 | 2,12E-01 | 4,79E-01 |
| <i>SLC45A4</i>         | 1,09  | 2,12E-01 | 4,79E-01 |
| <i>THC2384784</i>      | 1,04  | 2,12E-01 | 4,79E-01 |
| <i>WFIKKN1</i>         | -1,09 | 2,12E-01 | 4,79E-01 |
| <i>FANCM</i>           | -1,05 | 2,12E-01 | 4,79E-01 |
| <i>GHRH</i>            | 1,05  | 2,12E-01 | 4,79E-01 |
| <i>CNGA3</i>           | 1,15  | 2,12E-01 | 4,79E-01 |
| <i>THC2311746</i>      | -1,10 | 2,12E-01 | 4,79E-01 |
| <i>KIAA1648</i>        | 1,05  | 2,12E-01 | 4,79E-01 |
| <i>LCN6</i>            | 1,09  | 2,12E-01 | 4,79E-01 |
| <i>TFPI2</i>           | 1,22  | 2,12E-01 | 4,79E-01 |
| <i>ENST00000383448</i> | -1,06 | 2,12E-01 | 4,79E-01 |
| <i>THC2439829</i>      | -1,07 | 2,12E-01 | 4,79E-01 |
| <i>AK092531</i>        | -1,05 | 2,12E-01 | 4,79E-01 |
| <i>A_24_P824578</i>    | -1,05 | 2,12E-01 | 4,79E-01 |
| <i>HDAC11</i>          | 1,05  | 2,12E-01 | 4,79E-01 |
| <i>THC2365651</i>      | -1,06 | 2,12E-01 | 4,79E-01 |
| <i>TLOC1</i>           | -1,05 | 2,12E-01 | 4,79E-01 |
| <i>OR1E1</i>           | 1,05  | 2,12E-01 | 4,79E-01 |
| <i>PIGZ</i>            | 1,08  | 2,12E-01 | 4,79E-01 |
| <i>CCL24</i>           | 1,10  | 2,12E-01 | 4,79E-01 |
| <i>KIAA1160</i>        | 1,04  | 2,12E-01 | 4,79E-01 |
| <i>ANXA11</i>          | 1,05  | 2,12E-01 | 4,79E-01 |
| <i>ENST00000316269</i> | -1,04 | 2,12E-01 | 4,79E-01 |
| <i>THC2282467</i>      | 1,07  | 2,12E-01 | 4,79E-01 |
| <i>THC2313201</i>      | -1,10 | 2,12E-01 | 4,80E-01 |
| <i>AF116668</i>        | 1,05  | 2,12E-01 | 4,80E-01 |
| <i>RNF130</i>          | -1,05 | 2,12E-01 | 4,80E-01 |
| <i>A_24_P517355</i>    | -1,04 | 2,12E-01 | 4,80E-01 |
| <i>CCDC97</i>          | -1,04 | 2,12E-01 | 4,80E-01 |
| <i>THC2400343</i>      | -1,04 | 2,12E-01 | 4,80E-01 |
| <i>CIP29</i>           | 1,03  | 2,13E-01 | 4,80E-01 |
| <i>AK023559</i>        | 1,06  | 2,13E-01 | 4,80E-01 |
| <i>THC2439773</i>      | -1,10 | 2,13E-01 | 4,80E-01 |
| <i>LOC440863</i>       | -1,05 | 2,13E-01 | 4,80E-01 |
| <i>APLP1</i>           | -1,05 | 2,13E-01 | 4,80E-01 |
| <i>AK026659</i>        | -1,06 | 2,13E-01 | 4,80E-01 |
| <i>VPS26B</i>          | -1,05 | 2,13E-01 | 4,80E-01 |
| <i>C6orf153</i>        | 1,04  | 2,13E-01 | 4,80E-01 |
| <i>HOXD13</i>          | -1,11 | 2,13E-01 | 4,80E-01 |

|                     |       |          |          |
|---------------------|-------|----------|----------|
| <i>GGT2</i>         | 1,04  | 2,13E-01 | 4,80E-01 |
| <i>AK098134</i>     | -1,09 | 2,13E-01 | 4,80E-01 |
| <i>DYNLL1</i>       | -1,07 | 2,13E-01 | 4,80E-01 |
| <i>TIMM23</i>       | 1,05  | 2,13E-01 | 4,80E-01 |
| <i>AF290475</i>     | -1,05 | 2,13E-01 | 4,80E-01 |
| <i>MGC22793</i>     | -1,04 | 2,13E-01 | 4,80E-01 |
| <i>BBS4</i>         | -1,04 | 2,13E-01 | 4,80E-01 |
| <i>AK000130</i>     | 1,06  | 2,13E-01 | 4,80E-01 |
| <i>BF939434</i>     | 1,06  | 2,13E-01 | 4,80E-01 |
| <i>THC2408789</i>   | 1,04  | 2,13E-01 | 4,81E-01 |
| <i>DNAH17</i>       | 1,04  | 2,13E-01 | 4,81E-01 |
| <i>A_24_P910255</i> | 1,05  | 2,13E-01 | 4,81E-01 |
| <i>TLX2</i>         | 1,05  | 2,13E-01 | 4,81E-01 |
| <i>THC2408967</i>   | -1,08 | 2,13E-01 | 4,81E-01 |
| <i>AK001503</i>     | -1,05 | 2,13E-01 | 4,81E-01 |
| <i>BRE</i>          | 1,04  | 2,13E-01 | 4,81E-01 |
| <i>BC022565</i>     | 1,05  | 2,13E-01 | 4,81E-01 |
| <i>COX7B2</i>       | -1,04 | 2,14E-01 | 4,81E-01 |
| <i>AB064667</i>     | 1,05  | 2,14E-01 | 4,81E-01 |
| <i>A_24_P914669</i> | -1,07 | 2,14E-01 | 4,81E-01 |
| <i>FLJ46266</i>     | -1,05 | 2,14E-01 | 4,81E-01 |
| <i>TNNI3K</i>       | -1,04 | 2,14E-01 | 4,81E-01 |
| <i>BX091769</i>     | 1,04  | 2,14E-01 | 4,81E-01 |
| <i>AI870240</i>     | 1,04  | 2,14E-01 | 4,82E-01 |
| <i>AK124344</i>     | -1,04 | 2,14E-01 | 4,82E-01 |
| <i>L12052</i>       | 1,03  | 2,14E-01 | 4,82E-01 |
| <i>NOTUM</i>        | 1,06  | 2,14E-01 | 4,82E-01 |
| <i>LASS5</i>        | 1,04  | 2,14E-01 | 4,82E-01 |
| <i>PRB4</i>         | 1,06  | 2,14E-01 | 4,82E-01 |
| <i>KIAA1737</i>     | -1,10 | 2,14E-01 | 4,82E-01 |
| <i>BE786351</i>     | -1,07 | 2,14E-01 | 4,82E-01 |
| <i>VAMP3</i>        | 1,04  | 2,14E-01 | 4,82E-01 |
| <i>THC2281304</i>   | 1,06  | 2,14E-01 | 4,82E-01 |
| <i>MCFP</i>         | -1,04 | 2,14E-01 | 4,82E-01 |
| <i>FGF16</i>        | 1,05  | 2,14E-01 | 4,82E-01 |
| <i>AI064892</i>     | 1,06  | 2,14E-01 | 4,82E-01 |
| <i>MRPL51</i>       | -1,04 | 2,14E-01 | 4,82E-01 |
| <i>CNOT3</i>        | -1,04 | 2,14E-01 | 4,82E-01 |
| <i>U12206</i>       | 1,04  | 2,14E-01 | 4,82E-01 |
| <i>HOXA1</i>        | 1,06  | 2,14E-01 | 4,82E-01 |
| <i>THC2429266</i>   | -1,06 | 2,14E-01 | 4,83E-01 |
| <i>CYP27A1</i>      | 1,10  | 2,14E-01 | 4,83E-01 |
| <i>MPL</i>          | -1,10 | 2,15E-01 | 4,83E-01 |
| <i>A_24_P927205</i> | -1,10 | 2,15E-01 | 4,83E-01 |

|                        |       |          |          |
|------------------------|-------|----------|----------|
| <i>PCID1</i>           | -1,04 | 2,15E-01 | 4,83E-01 |
| <i>MEF2B</i>           | 1,04  | 2,15E-01 | 4,83E-01 |
| <i>AKT1S1</i>          | 1,05  | 2,15E-01 | 4,83E-01 |
| <i>THC2314276</i>      | 1,06  | 2,15E-01 | 4,83E-01 |
| <i>SEL1L</i>           | 1,06  | 2,15E-01 | 4,83E-01 |
| <i>A_24_P409910</i>    | 1,09  | 2,15E-01 | 4,83E-01 |
| <i>HIP1R</i>           | 1,09  | 2,15E-01 | 4,83E-01 |
| <i>CD80</i>            | 1,03  | 2,15E-01 | 4,83E-01 |
| <i>ZNF266</i>          | -1,06 | 2,15E-01 | 4,83E-01 |
| <i>GALNT8</i>          | -1,05 | 2,15E-01 | 4,83E-01 |
| <i>ENST00000361461</i> | -1,03 | 2,15E-01 | 4,83E-01 |
| <i>ENST00000321792</i> | 1,04  | 2,15E-01 | 4,83E-01 |
| <i>ZNF76</i>           | 1,05  | 2,15E-01 | 4,83E-01 |
| <i>A_23_P133949</i>    | 1,05  | 2,15E-01 | 4,83E-01 |
| <i>A_24_P58597</i>     | 1,05  | 2,15E-01 | 4,83E-01 |
| <i>SKP2</i>            | 1,06  | 2,15E-01 | 4,83E-01 |
| <i>AI475779</i>        | 1,09  | 2,15E-01 | 4,83E-01 |
| <i>THC2406238</i>      | 1,04  | 2,15E-01 | 4,83E-01 |
| <i>HORMAD1</i>         | -1,05 | 2,15E-01 | 4,83E-01 |
| <i>SCP2</i>            | -1,06 | 2,15E-01 | 4,83E-01 |
| <i>A_24_P237820</i>    | 1,08  | 2,15E-01 | 4,83E-01 |
| <i>PALLD</i>           | 1,12  | 2,15E-01 | 4,83E-01 |
| <i>FLJ31659</i>        | -1,08 | 2,15E-01 | 4,83E-01 |
| <i>ENST00000312504</i> | -1,06 | 2,15E-01 | 4,83E-01 |
| <i>MGC3771</i>         | -1,05 | 2,15E-01 | 4,83E-01 |
| <i>AK097034</i>        | -1,05 | 2,15E-01 | 4,83E-01 |
| <i>NTSR2</i>           | 1,04  | 2,15E-01 | 4,83E-01 |
| <i>MEGF8</i>           | 1,06  | 2,15E-01 | 4,83E-01 |
| <i>A_24_P400616</i>    | 1,06  | 2,15E-01 | 4,83E-01 |
| <i>A_24_P585660</i>    | 1,08  | 2,15E-01 | 4,83E-01 |
| <i>THC2435579</i>      | -1,18 | 2,15E-01 | 4,83E-01 |
| <i>KRT33B</i>          | -1,07 | 2,15E-01 | 4,83E-01 |
| <i>FLJ43860</i>        | 1,03  | 2,15E-01 | 4,83E-01 |
| <i>A_32_P65530</i>     | -1,05 | 2,15E-01 | 4,83E-01 |
| <i>ENST00000332617</i> | -1,04 | 2,15E-01 | 4,83E-01 |
| <i>ARNT</i>            | 1,07  | 2,15E-01 | 4,83E-01 |
| <i>XKR3</i>            | -1,06 | 2,16E-01 | 4,83E-01 |
| <i>THC2419781</i>      | 1,06  | 2,16E-01 | 4,83E-01 |
| <i>ADORA3</i>          | -1,06 | 2,16E-01 | 4,83E-01 |
| <i>KIAA0430</i>        | -1,06 | 2,16E-01 | 4,83E-01 |
| <i>C1orf74</i>         | -1,06 | 2,16E-01 | 4,83E-01 |
| <i>DNM1DN8-2</i>       | 1,05  | 2,16E-01 | 4,83E-01 |
| <i>CR611629</i>        | 1,09  | 2,16E-01 | 4,83E-01 |
| <i>AA448469</i>        | -1,05 | 2,16E-01 | 4,83E-01 |

|                        |       |          |          |
|------------------------|-------|----------|----------|
| <i>ENST00000302091</i> | 1,04  | 2,16E-01 | 4,83E-01 |
| <i>A_24_P921167</i>    | -1,05 | 2,16E-01 | 4,84E-01 |
| <i>CFP</i>             | -1,12 | 2,16E-01 | 4,84E-01 |
| <i>HDAC9</i>           | -1,09 | 2,16E-01 | 4,84E-01 |
| <i>RBL2</i>            | -1,04 | 2,16E-01 | 4,84E-01 |
| <i>MRGPRE</i>          | 1,04  | 2,16E-01 | 4,84E-01 |
| <i>MUT</i>             | -1,04 | 2,16E-01 | 4,84E-01 |
| <i>ZCWPW1</i>          | -1,05 | 2,16E-01 | 4,84E-01 |
| <i>OR1L3</i>           | 1,05  | 2,16E-01 | 4,84E-01 |
| <i>POLL</i>            | 1,04  | 2,16E-01 | 4,84E-01 |
| <i>BC028232</i>        | 1,08  | 2,16E-01 | 4,84E-01 |
| <i>ABCC4</i>           | 1,04  | 2,16E-01 | 4,84E-01 |
| <i>BU570396</i>        | 1,04  | 2,16E-01 | 4,84E-01 |
| <i>POLR3E</i>          | -1,06 | 2,16E-01 | 4,84E-01 |
| <i>AA452590</i>        | 1,05  | 2,16E-01 | 4,84E-01 |
| <i>PFDN4</i>           | 1,04  | 2,16E-01 | 4,84E-01 |
| <i>ATOX1</i>           | 1,05  | 2,16E-01 | 4,84E-01 |
| <i>BC019044</i>        | 1,06  | 2,16E-01 | 4,84E-01 |
| <i>C10orf130</i>       | 1,10  | 2,16E-01 | 4,84E-01 |
| <i>THC2287766</i>      | -1,06 | 2,16E-01 | 4,84E-01 |
| <i>ENST00000342688</i> | 1,07  | 2,16E-01 | 4,84E-01 |
| <i>REEP2</i>           | 1,16  | 2,16E-01 | 4,84E-01 |
| <i>AY358191</i>        | 1,04  | 2,16E-01 | 4,84E-01 |
| <i>ANKRD18A</i>        | 1,08  | 2,16E-01 | 4,84E-01 |
| <i>LOC283454</i>       | -1,07 | 2,17E-01 | 4,85E-01 |
| <i>ENST00000323662</i> | 1,04  | 2,17E-01 | 4,85E-01 |
| <i>THC2318533</i>      | 1,07  | 2,17E-01 | 4,85E-01 |
| <i>ADAMTS20</i>        | 1,04  | 2,17E-01 | 4,85E-01 |
| <i>MCM5</i>            | 1,05  | 2,17E-01 | 4,85E-01 |
| <i>A_24_P246863</i>    | 1,13  | 2,17E-01 | 4,85E-01 |
| <i>ACCN2</i>           | -1,11 | 2,17E-01 | 4,85E-01 |
| <i>VAC14</i>           | -1,04 | 2,17E-01 | 4,85E-01 |
| <i>MTMR12</i>          | 1,05  | 2,17E-01 | 4,85E-01 |
| <i>AL832253</i>        | 1,13  | 2,17E-01 | 4,85E-01 |
| <i>ENST00000332359</i> | -1,08 | 2,17E-01 | 4,85E-01 |
| <i>A_24_P927451</i>    | 1,05  | 2,17E-01 | 4,85E-01 |
| <i>SLCO3A1</i>         | 1,06  | 2,17E-01 | 4,85E-01 |
| <i>SPINK2</i>          | -1,12 | 2,17E-01 | 4,85E-01 |
| <i>MAFA</i>            | 1,09  | 2,17E-01 | 4,85E-01 |
| <i>RAB6IP1</i>         | 1,05  | 2,17E-01 | 4,85E-01 |
| <i>A_23_P208582</i>    | -1,05 | 2,17E-01 | 4,86E-01 |
| <i>ENST00000358917</i> | -1,08 | 2,17E-01 | 4,86E-01 |
| <i>THC2273208</i>      | -1,04 | 2,17E-01 | 4,86E-01 |
| <i>TMED4</i>           | 1,05  | 2,17E-01 | 4,86E-01 |

|                        |       |          |          |
|------------------------|-------|----------|----------|
| <i>LGALS1</i>          | -1,10 | 2,17E-01 | 4,86E-01 |
| <i>KIAA0415</i>        | -1,04 | 2,17E-01 | 4,86E-01 |
| <i>BC027619</i>        | 1,04  | 2,17E-01 | 4,86E-01 |
| <i>HIST1H2BH</i>       | -1,05 | 2,18E-01 | 4,86E-01 |
| <i>AF040257</i>        | 1,04  | 2,18E-01 | 4,86E-01 |
| <i>PPFIA2</i>          | 1,12  | 2,18E-01 | 4,86E-01 |
| <i>LOC440292</i>       | 1,05  | 2,18E-01 | 4,86E-01 |
| <i>BI008718</i>        | 1,04  | 2,18E-01 | 4,86E-01 |
| <i>NTSR1</i>           | 1,04  | 2,18E-01 | 4,86E-01 |
| <i>CR590302</i>        | -1,06 | 2,18E-01 | 4,86E-01 |
| <i>FAM19A1</i>         | -1,04 | 2,18E-01 | 4,86E-01 |
| <i>PRMT1</i>           | 1,05  | 2,18E-01 | 4,86E-01 |
| <i>THC2380988</i>      | 1,06  | 2,18E-01 | 4,86E-01 |
| <i>FLJ22531</i>        | 1,06  | 2,18E-01 | 4,86E-01 |
| <i>RNF148</i>          | 1,12  | 2,18E-01 | 4,86E-01 |
| <i>AT_ssH_AB_5</i>     | 1,15  | 2,18E-01 | 4,86E-01 |
| <i>A_24_P922647</i>    | -1,04 | 2,18E-01 | 4,86E-01 |
| <i>AHRR</i>            | 1,14  | 2,18E-01 | 4,86E-01 |
| <i>AW771919</i>        | -1,06 | 2,18E-01 | 4,86E-01 |
| <i>RBPMS</i>           | 1,10  | 2,18E-01 | 4,86E-01 |
| <i>BAGE4</i>           | 1,07  | 2,18E-01 | 4,87E-01 |
| <i>NFX1</i>            | 1,03  | 2,18E-01 | 4,87E-01 |
| <i>ANKRD54</i>         | -1,05 | 2,18E-01 | 4,87E-01 |
| <i>THC2284935</i>      | -1,10 | 2,18E-01 | 4,87E-01 |
| <i>THC2449593</i>      | -1,05 | 2,18E-01 | 4,87E-01 |
| <i>LOC440013</i>       | 1,04  | 2,18E-01 | 4,87E-01 |
| <i>GPR88</i>           | 1,06  | 2,18E-01 | 4,87E-01 |
| <i>RAB23</i>           | 1,12  | 2,18E-01 | 4,87E-01 |
| <i>NPY</i>             | 1,64  | 2,18E-01 | 4,87E-01 |
| <i>AI868037</i>        | 1,04  | 2,18E-01 | 4,87E-01 |
| <i>BF109232</i>        | -1,04 | 2,18E-01 | 4,87E-01 |
| <i>TBX1</i>            | -1,13 | 2,19E-01 | 4,87E-01 |
| <i>TCTA</i>            | -1,06 | 2,19E-01 | 4,87E-01 |
| <i>PRDM9</i>           | -1,03 | 2,19E-01 | 4,87E-01 |
| <i>OSBPL9</i>          | 1,07  | 2,19E-01 | 4,87E-01 |
| <i>THAP10</i>          | -1,06 | 2,19E-01 | 4,87E-01 |
| <i>BC007357</i>        | -1,07 | 2,19E-01 | 4,87E-01 |
| <i>AJ002788</i>        | -1,15 | 2,19E-01 | 4,87E-01 |
| <i>ENST00000373644</i> | -1,05 | 2,19E-01 | 4,87E-01 |
| <i>SLC25A3</i>         | 1,04  | 2,19E-01 | 4,88E-01 |
| <i>LOC442511</i>       | 1,05  | 2,19E-01 | 4,88E-01 |
| <i>S100A1</i>          | 1,05  | 2,19E-01 | 4,88E-01 |
| <i>A_24_P928333</i>    | 1,04  | 2,19E-01 | 4,88E-01 |
| <i>LOC339123</i>       | 1,05  | 2,19E-01 | 4,88E-01 |

|                        |       |          |          |
|------------------------|-------|----------|----------|
| <i>T47335</i>          | -1,08 | 2,19E-01 | 4,88E-01 |
| <i>THC2281830</i>      | -1,05 | 2,19E-01 | 4,88E-01 |
| <i>AK074097</i>        | 1,06  | 2,19E-01 | 4,88E-01 |
| <i>ABCC8</i>           | -1,24 | 2,19E-01 | 4,88E-01 |
| <i>MEOX1</i>           | 1,11  | 2,19E-01 | 4,88E-01 |
| <i>ENST00000371655</i> | -1,07 | 2,19E-01 | 4,88E-01 |
| <i>LPA</i>             | -1,05 | 2,19E-01 | 4,88E-01 |
| <i>TM4SF4</i>          | 1,06  | 2,19E-01 | 4,88E-01 |
| <i>THC2407595</i>      | 1,06  | 2,19E-01 | 4,88E-01 |
| <i>THC2338825</i>      | -1,06 | 2,19E-01 | 4,88E-01 |
| <i>LOC283537</i>       | -1,06 | 2,19E-01 | 4,88E-01 |
| <i>PERQ1</i>           | -1,05 | 2,19E-01 | 4,88E-01 |
| <i>AK128048</i>        | 1,06  | 2,19E-01 | 4,88E-01 |
| <i>DKFZP434H168</i>    | 1,06  | 2,19E-01 | 4,88E-01 |
| <i>TAF10</i>           | -1,05 | 2,19E-01 | 4,88E-01 |
| <i>AA458851</i>        | -1,04 | 2,19E-01 | 4,88E-01 |
| <i>A_24_P195621</i>    | 1,06  | 2,20E-01 | 4,88E-01 |
| <i>C8orf53</i>         | -1,04 | 2,20E-01 | 4,88E-01 |
| <i>NASP</i>            | 1,05  | 2,20E-01 | 4,88E-01 |
| <i>FLJ14154</i>        | 1,05  | 2,20E-01 | 4,88E-01 |
| <i>CD608671</i>        | 1,06  | 2,20E-01 | 4,88E-01 |
| <i>EDARADD</i>         | 1,08  | 2,20E-01 | 4,89E-01 |
| <i>THC2323620</i>      | -1,07 | 2,20E-01 | 4,89E-01 |
| <i>KLK11</i>           | 1,56  | 2,20E-01 | 4,89E-01 |
| <i>AF119885</i>        | 1,04  | 2,20E-01 | 4,89E-01 |
| <i>ZNHIT4</i>          | 1,06  | 2,20E-01 | 4,89E-01 |
| <i>DKFZp686l15217</i>  | -1,05 | 2,20E-01 | 4,89E-01 |
| <i>BG203539</i>        | -1,05 | 2,20E-01 | 4,89E-01 |
| <i>THC2379403</i>      | -1,06 | 2,20E-01 | 4,89E-01 |
| <i>A_24_P921412</i>    | -1,05 | 2,20E-01 | 4,89E-01 |
| <i>ENST00000299415</i> | -1,03 | 2,20E-01 | 4,89E-01 |
| <i>DDIT4L</i>          | -1,29 | 2,20E-01 | 4,89E-01 |
| <i>AK074369</i>        | -1,05 | 2,20E-01 | 4,89E-01 |
| <i>ENST00000333731</i> | -1,05 | 2,20E-01 | 4,89E-01 |
| <i>ENST00000324656</i> | 1,04  | 2,20E-01 | 4,89E-01 |
| <i>SLC44A3</i>         | -1,07 | 2,20E-01 | 4,89E-01 |
| <i>SIGLEC1</i>         | -1,10 | 2,20E-01 | 4,89E-01 |
| <i>THC2440664</i>      | -1,05 | 2,20E-01 | 4,89E-01 |
| <i>AF074982</i>        | -1,04 | 2,20E-01 | 4,89E-01 |
| <i>C12orf51</i>        | 1,05  | 2,20E-01 | 4,89E-01 |
| <i>PPIC</i>            | 1,13  | 2,20E-01 | 4,89E-01 |
| <i>AK094873</i>        | 1,05  | 2,20E-01 | 4,89E-01 |
| <i>KIAA1199</i>        | -1,29 | 2,20E-01 | 4,89E-01 |
| <i>PTHB1</i>           | -1,04 | 2,20E-01 | 4,90E-01 |

|                     |       |          |          |
|---------------------|-------|----------|----------|
| <i>AV737563</i>     | 1,08  | 2,20E-01 | 4,90E-01 |
| <i>EDG1</i>         | 1,09  | 2,21E-01 | 4,90E-01 |
| <i>CCDC39</i>       | -1,06 | 2,21E-01 | 4,90E-01 |
| <i>NUDC</i>         | 1,05  | 2,21E-01 | 4,90E-01 |
| <i>THC2263873</i>   | -1,04 | 2,21E-01 | 4,90E-01 |
| <i>ATP9A</i>        | 1,11  | 2,21E-01 | 4,90E-01 |
| <i>AK124806</i>     | -1,08 | 2,21E-01 | 4,90E-01 |
| <i>THC2256652</i>   | 1,04  | 2,21E-01 | 4,90E-01 |
| <i>DCP_20_0</i>     | 1,15  | 2,21E-01 | 4,90E-01 |
| <i>BC031936</i>     | 1,05  | 2,21E-01 | 4,90E-01 |
| <i>RAB43</i>        | -1,04 | 2,21E-01 | 4,90E-01 |
| <i>CASP3</i>        | 1,05  | 2,21E-01 | 4,90E-01 |
| <i>CLEC12A</i>      | -1,07 | 2,21E-01 | 4,90E-01 |
| <i>HIC1</i>         | 1,09  | 2,21E-01 | 4,90E-01 |
| <i>PLXNB2</i>       | -1,06 | 2,21E-01 | 4,91E-01 |
| <i>KIAA1033</i>     | -1,05 | 2,21E-01 | 4,91E-01 |
| <i>HIST1H2BA</i>    | -1,05 | 2,21E-01 | 4,91E-01 |
| <i>A_32_P121483</i> | -1,04 | 2,21E-01 | 4,91E-01 |
| <i>RAB34</i>        | -1,05 | 2,21E-01 | 4,91E-01 |
| <i>FAM13C1</i>      | -1,13 | 2,21E-01 | 4,91E-01 |
| <i>AA731781</i>     | -1,04 | 2,21E-01 | 4,91E-01 |
| <i>OR3A3</i>        | 1,06  | 2,21E-01 | 4,91E-01 |
| <i>CTNBL1</i>       | 1,05  | 2,21E-01 | 4,91E-01 |
| <i>THC2304851</i>   | 1,04  | 2,21E-01 | 4,91E-01 |
| <i>AL109706</i>     | -1,05 | 2,22E-01 | 4,91E-01 |
| <i>A_24_P238836</i> | 1,12  | 2,22E-01 | 4,91E-01 |
| <i>BE144057</i>     | -1,07 | 2,22E-01 | 4,91E-01 |
| <i>AY358257</i>     | -1,05 | 2,22E-01 | 4,91E-01 |
| <i>PPY2</i>         | 1,05  | 2,22E-01 | 4,91E-01 |
| <i>DCP_20_1</i>     | 1,14  | 2,22E-01 | 4,91E-01 |
| <i>NCOA3</i>        | -1,05 | 2,22E-01 | 4,91E-01 |
| <i>GRB2</i>         | -1,04 | 2,22E-01 | 4,91E-01 |
| <i>DNMT2</i>        | 1,04  | 2,22E-01 | 4,91E-01 |
| <i>C14orf179</i>    | 1,04  | 2,22E-01 | 4,91E-01 |
| <i>DHX38</i>        | 1,05  | 2,22E-01 | 4,91E-01 |
| <i>OR2H1</i>        | 1,09  | 2,22E-01 | 4,91E-01 |
| <i>AR</i>           | -1,06 | 2,22E-01 | 4,91E-01 |
| <i>FKSG83</i>       | 1,04  | 2,22E-01 | 4,91E-01 |
| <i>SLC39A9</i>      | 1,04  | 2,22E-01 | 4,91E-01 |
| <i>MGC12935</i>     | 1,06  | 2,22E-01 | 4,91E-01 |
| <i>LOC339778</i>    | -1,06 | 2,22E-01 | 4,91E-01 |
| <i>THC2374442</i>   | -1,06 | 2,22E-01 | 4,92E-01 |
| <i>FLJ13231</i>     | -1,05 | 2,22E-01 | 4,92E-01 |
| <i>TIGD4</i>        | -1,04 | 2,22E-01 | 4,92E-01 |



|                        |       |          |          |
|------------------------|-------|----------|----------|
| <i>RPS14</i>           | -1,04 | 2,22E-01 | 4,92E-01 |
| <i>ADM2</i>            | 1,05  | 2,22E-01 | 4,92E-01 |
| <i>NUP153</i>          | -1,05 | 2,22E-01 | 4,92E-01 |
| <i>RIPK5</i>           | 1,04  | 2,22E-01 | 4,92E-01 |
| <i>A_24_P461664</i>    | 1,07  | 2,22E-01 | 4,92E-01 |
| <i>THC2379039</i>      | -1,05 | 2,22E-01 | 4,92E-01 |
| <i>ENST00000366932</i> | -1,06 | 2,22E-01 | 4,92E-01 |
| <i>SYTL1</i>           | -1,17 | 2,22E-01 | 4,92E-01 |
| <i>DNM3</i>            | -1,09 | 2,22E-01 | 4,92E-01 |
| <i>GPR19</i>           | -1,04 | 2,22E-01 | 4,92E-01 |
| <i>A_24_P929845</i>    | -1,05 | 2,23E-01 | 4,93E-01 |
| <i>MGC3265</i>         | -1,04 | 2,23E-01 | 4,93E-01 |
| <i>AI796784</i>        | 1,04  | 2,23E-01 | 4,93E-01 |
| <i>MYO9B</i>           | 1,06  | 2,23E-01 | 4,93E-01 |
| <i>BC069749</i>        | -1,05 | 2,23E-01 | 4,93E-01 |
| <i>THC2409336</i>      | 1,04  | 2,23E-01 | 4,93E-01 |
| <i>PGK2</i>            | 1,04  | 2,23E-01 | 4,93E-01 |
| <i>A_24_P306585</i>    | 1,06  | 2,23E-01 | 4,93E-01 |
| <i>BNIP3</i>           | -1,06 | 2,23E-01 | 4,93E-01 |
| <i>A_24_P749080</i>    | -1,05 | 2,23E-01 | 4,93E-01 |
| <i>EXOSC4</i>          | -1,06 | 2,23E-01 | 4,93E-01 |
| <i>AZGP1</i>           | -1,05 | 2,23E-01 | 4,93E-01 |
| <i>COX5A</i>           | 1,05  | 2,23E-01 | 4,93E-01 |
| <i>THC2303869</i>      | -1,08 | 2,23E-01 | 4,93E-01 |
| <i>LOC399818</i>       | -1,05 | 2,23E-01 | 4,93E-01 |
| <i>ABR</i>             | 1,07  | 2,23E-01 | 4,93E-01 |
| <i>BF675806</i>        | 1,19  | 2,23E-01 | 4,93E-01 |
| <i>RBMXL1</i>          | 1,05  | 2,23E-01 | 4,93E-01 |
| <i>ATPBD1C</i>         | -1,07 | 2,23E-01 | 4,94E-01 |
| <i>C11orf66</i>        | 1,04  | 2,23E-01 | 4,94E-01 |
| <i>EIF2A</i>           | 1,05  | 2,23E-01 | 4,94E-01 |
| <i>ZNF396</i>          | -1,03 | 2,23E-01 | 4,94E-01 |
| <i>BF983943</i>        | 1,07  | 2,23E-01 | 4,94E-01 |
| <i>TSPAN19</i>         | -1,04 | 2,24E-01 | 4,94E-01 |
| <i>BX281073</i>        | 1,07  | 2,24E-01 | 4,94E-01 |
| <i>BQ379494</i>        | 1,05  | 2,24E-01 | 4,94E-01 |
| <i>DIO2</i>            | 1,37  | 2,24E-01 | 4,94E-01 |
| <i>GLS2</i>            | -1,09 | 2,24E-01 | 4,94E-01 |
| <i>C12orf60</i>        | -1,09 | 2,24E-01 | 4,94E-01 |
| <i>PCSK4</i>           | -1,06 | 2,24E-01 | 4,94E-01 |
| <i>BP217036</i>        | -1,06 | 2,24E-01 | 4,94E-01 |
| <i>RPL12</i>           | -1,05 | 2,24E-01 | 4,94E-01 |
| <i>WVOX</i>            | -1,05 | 2,24E-01 | 4,94E-01 |
| <i>FANCB</i>           | 1,04  | 2,24E-01 | 4,94E-01 |

|                        |       |          |          |
|------------------------|-------|----------|----------|
| <i>PDE4DIP</i>         | 1,13  | 2,24E-01 | 4,94E-01 |
| <i>CR616772</i>        | 1,06  | 2,24E-01 | 4,94E-01 |
| <i>A_24_P58727</i>     | 1,06  | 2,24E-01 | 4,94E-01 |
| <i>A_32_P234543</i>    | 1,08  | 2,24E-01 | 4,94E-01 |
| <i>GNAI1</i>           | -1,11 | 2,24E-01 | 4,94E-01 |
| <i>IKBKG</i>           | 1,03  | 2,24E-01 | 4,94E-01 |
| <i>C14orf129</i>       | 1,04  | 2,24E-01 | 4,94E-01 |
| <i>NDUFB1</i>          | 1,04  | 2,24E-01 | 4,94E-01 |
| <i>PTP4A2</i>          | 1,05  | 2,24E-01 | 4,94E-01 |
| <i>POMZP3</i>          | 1,06  | 2,24E-01 | 4,94E-01 |
| <i>SMPD1</i>           | 1,06  | 2,24E-01 | 4,94E-01 |
| <i>HIST1H4I</i>        | 1,09  | 2,24E-01 | 4,94E-01 |
| <i>THC2367413</i>      | -1,06 | 2,24E-01 | 4,94E-01 |
| <i>CA772440</i>        | -1,05 | 2,24E-01 | 4,94E-01 |
| <i>FAM86A</i>          | -1,05 | 2,24E-01 | 4,94E-01 |
| <i>LIME1</i>           | 1,03  | 2,24E-01 | 4,94E-01 |
| <i>PDHA2</i>           | 1,05  | 2,24E-01 | 4,94E-01 |
| <i>MBNL1</i>           | 1,08  | 2,24E-01 | 4,94E-01 |
| <i>MGC7036</i>         | 1,10  | 2,24E-01 | 4,94E-01 |
| <i>CYP2A7</i>          | 1,16  | 2,24E-01 | 4,94E-01 |
| <i>CNN3</i>            | -1,06 | 2,24E-01 | 4,94E-01 |
| <i>A_24_P928561</i>    | 1,04  | 2,24E-01 | 4,94E-01 |
| <i>A_24_P170309</i>    | 1,11  | 2,24E-01 | 4,94E-01 |
| <i>UPK2</i>            | 1,04  | 2,24E-01 | 4,94E-01 |
| <i>A_24_P936860</i>    | 1,05  | 2,24E-01 | 4,94E-01 |
| <i>BF436529</i>        | 1,08  | 2,25E-01 | 4,95E-01 |
| <i>ZNF678</i>          | -1,08 | 2,25E-01 | 4,95E-01 |
| <i>CLEC2D</i>          | -1,04 | 2,25E-01 | 4,95E-01 |
| <i>DC2</i>             | -1,10 | 2,25E-01 | 4,95E-01 |
| <i>ENST00000355077</i> | 1,11  | 2,25E-01 | 4,95E-01 |
| <i>TRIOBP</i>          | -1,06 | 2,25E-01 | 4,95E-01 |
| <i>ASAH3</i>           | 1,05  | 2,25E-01 | 4,95E-01 |
| <i>HIST1H2BO</i>       | -1,05 | 2,25E-01 | 4,95E-01 |
| <i>BU629094</i>        | -1,05 | 2,25E-01 | 4,95E-01 |
| <i>ZNF426</i>          | 1,05  | 2,25E-01 | 4,95E-01 |
| <i>USHBP1</i>          | -1,08 | 2,25E-01 | 4,95E-01 |
| <i>E1A_r60_α20</i>     | 1,14  | 2,25E-01 | 4,95E-01 |
| <i>FUS</i>             | -1,05 | 2,25E-01 | 4,95E-01 |
| <i>CHIC1</i>           | -1,06 | 2,25E-01 | 4,95E-01 |
| <i>A_24_P106166</i>    | 1,07  | 2,25E-01 | 4,95E-01 |
| <i>BC030092</i>        | -1,05 | 2,25E-01 | 4,95E-01 |
| <i>ETNK1</i>           | -1,04 | 2,25E-01 | 4,95E-01 |
| <i>GRHPR</i>           | 1,04  | 2,25E-01 | 4,95E-01 |
| <i>KIAA1704</i>        | -1,04 | 2,25E-01 | 4,95E-01 |

|                        |       |          |          |
|------------------------|-------|----------|----------|
| <i>THC2405319</i>      | -1,07 | 2,25E-01 | 4,96E-01 |
| <i>KIAA0274</i>        | 1,04  | 2,25E-01 | 4,96E-01 |
| <i>PTPRU</i>           | -1,09 | 2,25E-01 | 4,96E-01 |
| <i>SCN2A2</i>          | -1,07 | 2,25E-01 | 4,96E-01 |
| <i>ENST00000332696</i> | -1,05 | 2,25E-01 | 4,96E-01 |
| <i>THC2455389</i>      | -1,05 | 2,25E-01 | 4,96E-01 |
| <i>ITLN2</i>           | -1,08 | 2,25E-01 | 4,96E-01 |
| <i>DECR1</i>           | -1,06 | 2,26E-01 | 4,96E-01 |
| <i>QRSL1</i>           | -1,04 | 2,25E-01 | 4,96E-01 |
| <i>C14orf119</i>       | -1,04 | 2,26E-01 | 4,96E-01 |
| <i>TMIE</i>            | 1,06  | 2,26E-01 | 4,96E-01 |
| <i>THC2343709</i>      | -1,06 | 2,26E-01 | 4,96E-01 |
| <i>SNAI3</i>           | -1,06 | 2,26E-01 | 4,96E-01 |
| <i>THC2406368</i>      | -1,05 | 2,26E-01 | 4,96E-01 |
| <i>SUCLG1</i>          | 1,04  | 2,26E-01 | 4,96E-01 |
| <i>C12orf62</i>        | 1,05  | 2,26E-01 | 4,96E-01 |
| <i>TNFRSF19L</i>       | 1,05  | 2,26E-01 | 4,96E-01 |
| <i>IRAK3</i>           | 1,05  | 2,26E-01 | 4,96E-01 |
| <i>XBP1</i>            | -1,10 | 2,26E-01 | 4,96E-01 |
| <i>A_24_P918339</i>    | 1,05  | 2,26E-01 | 4,96E-01 |
| <i>THC2440228</i>      | -1,11 | 2,26E-01 | 4,96E-01 |
| <i>LOC152217</i>       | -1,06 | 2,26E-01 | 4,96E-01 |
| <i>AL136790</i>        | -1,04 | 2,26E-01 | 4,96E-01 |
| <i>TRABD</i>           | -1,04 | 2,26E-01 | 4,96E-01 |
| <i>COQ7</i>            | 1,05  | 2,26E-01 | 4,96E-01 |
| <i>SERINC3</i>         | 1,05  | 2,26E-01 | 4,96E-01 |
| <i>BC032506</i>        | 1,05  | 2,26E-01 | 4,96E-01 |
| <i>LOC339768</i>       | -1,21 | 2,26E-01 | 4,96E-01 |
| <i>CEP110</i>          | 1,05  | 2,26E-01 | 4,96E-01 |
| <i>TRIP4</i>           | -1,03 | 2,26E-01 | 4,96E-01 |
| <i>THC2444653</i>      | 1,04  | 2,26E-01 | 4,96E-01 |
| <i>A_32_P118959</i>    | 1,04  | 2,26E-01 | 4,96E-01 |
| <i>THC2331323</i>      | -1,11 | 2,26E-01 | 4,96E-01 |
| <i>A_32_P61132</i>     | 1,04  | 2,26E-01 | 4,96E-01 |
| <i>AW952039</i>        | 1,14  | 2,26E-01 | 4,96E-01 |
| <i>ENST00000360954</i> | -1,15 | 2,26E-01 | 4,97E-01 |
| <i>FLJ10490</i>        | 1,05  | 2,26E-01 | 4,97E-01 |
| <i>FBXW8</i>           | -1,05 | 2,26E-01 | 4,97E-01 |
| <i>MGC13005</i>        | -1,04 | 2,26E-01 | 4,97E-01 |
| <i>CASQ1</i>           | 1,18  | 2,27E-01 | 4,97E-01 |
| <i>THC2275676</i>      | 1,10  | 2,27E-01 | 4,97E-01 |
| <i>SH3PX3</i>          | -1,05 | 2,27E-01 | 4,97E-01 |
| <i>THC2313140</i>      | -1,05 | 2,27E-01 | 4,97E-01 |
| <i>FAM120AOS</i>       | 1,03  | 2,27E-01 | 4,97E-01 |

|                        |       |          |          |
|------------------------|-------|----------|----------|
| <i>TTY15</i>           | 1,06  | 2,27E-01 | 4,97E-01 |
| <i>CTA-126B4.3</i>     | 1,06  | 2,27E-01 | 4,97E-01 |
| <i>CFL1</i>            | 1,07  | 2,27E-01 | 4,97E-01 |
| <i>THC2379148</i>      | -1,06 | 2,27E-01 | 4,97E-01 |
| <i>AK055428</i>        | -1,04 | 2,27E-01 | 4,97E-01 |
| <i>CROT</i>            | 1,05  | 2,27E-01 | 4,97E-01 |
| <i>THC2376418</i>      | 1,10  | 2,27E-01 | 4,97E-01 |
| <i>DCP_1_2</i>         | 1,14  | 2,27E-01 | 4,97E-01 |
| <i>FLJ12825</i>        | -1,04 | 2,27E-01 | 4,98E-01 |
| <i>ANKRD30A</i>        | 1,05  | 2,27E-01 | 4,98E-01 |
| <i>A_24_P135830</i>    | 1,05  | 2,27E-01 | 4,98E-01 |
| <i>GCM2</i>            | 1,06  | 2,27E-01 | 4,98E-01 |
| <i>LOC554201</i>       | 1,04  | 2,27E-01 | 4,98E-01 |
| <i>GALNT10</i>         | -1,07 | 2,27E-01 | 4,98E-01 |
| <i>GTF3C3</i>          | -1,04 | 2,27E-01 | 4,98E-01 |
| <i>A_24_P332595</i>    | 1,06  | 2,27E-01 | 4,98E-01 |
| <i>A_24_P638608</i>    | 1,05  | 2,27E-01 | 4,98E-01 |
| <i>AK094373</i>        | 1,07  | 2,27E-01 | 4,98E-01 |
| <i>FLJ34515</i>        | 1,21  | 2,27E-01 | 4,98E-01 |
| <i>RRAGA</i>           | -1,06 | 2,27E-01 | 4,98E-01 |
| <i>H2AFV</i>           | 1,05  | 2,27E-01 | 4,98E-01 |
| <i>OTUD7B</i>          | 1,06  | 2,27E-01 | 4,98E-01 |
| <i>HOMER3</i>          | -1,06 | 2,27E-01 | 4,98E-01 |
| <i>KCNJ13</i>          | 1,05  | 2,28E-01 | 4,98E-01 |
| <i>MGC32805</i>        | -1,05 | 2,28E-01 | 4,98E-01 |
| <i>NDUFB7</i>          | 1,05  | 2,28E-01 | 4,98E-01 |
| <i>SLC16A10</i>        | 1,05  | 2,28E-01 | 4,98E-01 |
| <i>WDR54</i>           | -1,06 | 2,28E-01 | 4,98E-01 |
| <i>AF349445</i>        | 1,08  | 2,28E-01 | 4,98E-01 |
| <i>A_24_P483213</i>    | 1,04  | 2,28E-01 | 4,98E-01 |
| <i>A_24_P272653</i>    | 1,15  | 2,28E-01 | 4,98E-01 |
| <i>THC2278262</i>      | -1,09 | 2,28E-01 | 4,98E-01 |
| <i>LOC284570</i>       | -1,17 | 2,28E-01 | 4,98E-01 |
| <i>WASF1</i>           | -1,08 | 2,28E-01 | 4,99E-01 |
| <i>SLC6A4</i>          | 1,03  | 2,28E-01 | 4,99E-01 |
| <i>AK094995</i>        | -1,06 | 2,28E-01 | 4,99E-01 |
| <i>LOC153277</i>       | -1,06 | 2,28E-01 | 4,99E-01 |
| <i>IWS1</i>            | 1,04  | 2,28E-01 | 4,99E-01 |
| <i>THC2343246</i>      | 1,05  | 2,28E-01 | 4,99E-01 |
| <i>ENST00000369303</i> | 1,09  | 2,28E-01 | 4,99E-01 |
| <i>SAP18</i>           | 1,04  | 2,28E-01 | 4,99E-01 |
| <i>WISP1</i>           | -1,10 | 2,28E-01 | 4,99E-01 |
| <i>SECISBP2</i>        | -1,05 | 2,28E-01 | 4,99E-01 |
| <i>KRT26</i>           | -1,03 | 2,28E-01 | 4,99E-01 |

|                        |       |          |          |
|------------------------|-------|----------|----------|
| <i>RCC1</i>            | 1,05  | 2,28E-01 | 4,99E-01 |
| <i>IFNA21</i>          | 1,06  | 2,28E-01 | 4,99E-01 |
| <i>ENST00000295249</i> | 1,06  | 2,28E-01 | 4,99E-01 |
| <i>SEMA3D</i>          | 1,12  | 2,28E-01 | 4,99E-01 |
| <i>AK098537</i>        | -1,06 | 2,28E-01 | 4,99E-01 |
| <i>ENST00000236199</i> | 1,10  | 2,28E-01 | 4,99E-01 |
| <i>FOLR2</i>           | -1,12 | 2,28E-01 | 4,99E-01 |
| <i>SMAF1</i>           | -1,05 | 2,28E-01 | 4,99E-01 |
| <i>SEPN1</i>           | -1,05 | 2,28E-01 | 4,99E-01 |
| <i>LOC348180</i>       | 1,03  | 2,28E-01 | 4,99E-01 |
| <i>RBM24</i>           | 1,12  | 2,28E-01 | 4,99E-01 |
| <i>GPR27</i>           | -1,04 | 2,29E-01 | 4,99E-01 |
| <i>BC035102</i>        | 1,06  | 2,29E-01 | 4,99E-01 |
| <i>C21orf67</i>        | -1,04 | 2,29E-01 | 4,99E-01 |
| <i>YEATS4</i>          | 1,04  | 2,29E-01 | 4,99E-01 |
| <i>THC2407640</i>      | -1,09 | 2,29E-01 | 4,99E-01 |
| <i>BM676597</i>        | -1,05 | 2,29E-01 | 5,00E-01 |
| <i>AY343891</i>        | -1,35 | 2,29E-01 | 5,00E-01 |
| <i>PRG1</i>            | 1,12  | 2,29E-01 | 5,00E-01 |
| <i>THC2340436</i>      | 1,08  | 2,29E-01 | 5,00E-01 |
| <i>LENG4</i>           | -1,06 | 2,29E-01 | 5,00E-01 |
| <i>ZNHIT2</i>          | -1,05 | 2,29E-01 | 5,00E-01 |
| <i>RAD9A</i>           | -1,04 | 2,29E-01 | 5,00E-01 |
| <i>AA687366</i>        | -1,04 | 2,29E-01 | 5,00E-01 |
| <i>FAM81A</i>          | -1,07 | 2,29E-01 | 5,00E-01 |
| <i>LOC644165</i>       | 1,04  | 2,29E-01 | 5,00E-01 |
| <i>RPS4Y2</i>          | 1,05  | 2,29E-01 | 5,00E-01 |
| <i>PLCD3</i>           | 1,06  | 2,29E-01 | 5,00E-01 |
| <i>EGFL11</i>          | 1,04  | 2,29E-01 | 5,00E-01 |
| <i>USP48</i>           | -1,03 | 2,29E-01 | 5,00E-01 |
| <i>ENST00000382726</i> | 1,09  | 2,29E-01 | 5,00E-01 |
| <i>CORO1A</i>          | -1,09 | 2,29E-01 | 5,00E-01 |
| <i>GPR172A</i>         | 1,05  | 2,29E-01 | 5,00E-01 |
| <i>AF508906</i>        | 1,05  | 2,29E-01 | 5,01E-01 |
| <i>KRTCAP2</i>         | -1,04 | 2,29E-01 | 5,01E-01 |
| <i>A_24_P409933</i>    | -1,05 | 2,30E-01 | 5,01E-01 |
| <i>BC003386</i>        | -1,04 | 2,30E-01 | 5,01E-01 |
| <i>NDUFV2</i>          | 1,04  | 2,30E-01 | 5,01E-01 |
| <i>OR3A2</i>           | 1,05  | 2,30E-01 | 5,01E-01 |
| <i>GFRAL</i>           | 1,05  | 2,30E-01 | 5,01E-01 |
| <i>THC2392444</i>      | -1,11 | 2,30E-01 | 5,01E-01 |
| <i>BF509481</i>        | -1,04 | 2,30E-01 | 5,01E-01 |
| <i>TAOK2</i>           | 1,04  | 2,30E-01 | 5,01E-01 |
| <i>EIF2B2</i>          | 1,04  | 2,30E-01 | 5,01E-01 |

|                        |       |          |          |
|------------------------|-------|----------|----------|
| <i>MMP26</i>           | 1,05  | 2,30E-01 | 5,01E-01 |
| <i>SLC30A7</i>         | 1,05  | 2,30E-01 | 5,01E-01 |
| <i>TTL12</i>           | -1,05 | 2,30E-01 | 5,01E-01 |
| <i>UBE4A</i>           | -1,04 | 2,30E-01 | 5,01E-01 |
| <i>ENST00000295941</i> | 1,04  | 2,30E-01 | 5,01E-01 |
| <i>THC2417255</i>      | 1,05  | 2,30E-01 | 5,01E-01 |
| <i>ENST00000344015</i> | 1,05  | 2,30E-01 | 5,01E-01 |
| <i>BSN</i>             | -1,05 | 2,30E-01 | 5,01E-01 |
| <i>X77737</i>          | 1,09  | 2,30E-01 | 5,01E-01 |
| <i>SUPT7L</i>          | -1,03 | 2,30E-01 | 5,01E-01 |
| <i>CR597807</i>        | -1,07 | 2,30E-01 | 5,01E-01 |
| <i>HNRPF</i>           | 1,05  | 2,30E-01 | 5,01E-01 |
| <i>AI354226</i>        | 1,04  | 2,30E-01 | 5,01E-01 |
| <i>OR2J2</i>           | 1,06  | 2,30E-01 | 5,01E-01 |
| <i>AK124072</i>        | -1,10 | 2,30E-01 | 5,01E-01 |
| <i>KIAA1285</i>        | -1,04 | 2,30E-01 | 5,01E-01 |
| <i>YTHDC1</i>          | -1,05 | 2,30E-01 | 5,01E-01 |
| <i>A_32_P38500</i>     | -1,05 | 2,30E-01 | 5,02E-01 |
| <i>TAL2</i>            | -1,04 | 2,30E-01 | 5,02E-01 |
| <i>MGC2408</i>         | -1,08 | 2,31E-01 | 5,02E-01 |
| <i>RPL26</i>           | -1,05 | 2,31E-01 | 5,02E-01 |
| <i>MTSS1</i>           | -1,08 | 2,31E-01 | 5,02E-01 |
| <i>MXD4</i>            | -1,05 | 2,31E-01 | 5,02E-01 |
| <i>BX648930</i>        | 1,04  | 2,31E-01 | 5,02E-01 |
| <i>PGK1</i>            | 1,04  | 2,31E-01 | 5,02E-01 |
| <i>TBL3</i>            | 1,06  | 2,31E-01 | 5,02E-01 |
| <i>LOC723809</i>       | -1,04 | 2,31E-01 | 5,02E-01 |
| <i>AK123972</i>        | -1,06 | 2,31E-01 | 5,03E-01 |
| <i>CASP12</i>          | -1,05 | 2,31E-01 | 5,03E-01 |
| <i>BX427588</i>        | 1,15  | 2,31E-01 | 5,03E-01 |
| <i>PSCDBP</i>          | 1,24  | 2,31E-01 | 5,03E-01 |
| <i>LEPROTL1</i>        | -1,05 | 2,31E-01 | 5,03E-01 |
| <i>A_24_P922726</i>    | -1,06 | 2,31E-01 | 5,03E-01 |
| <i>SULT1E1</i>         | -1,07 | 2,32E-01 | 5,03E-01 |
| <i>RBBP9</i>           | -1,04 | 2,32E-01 | 5,03E-01 |
| <i>METT11D1</i>        | -1,04 | 2,31E-01 | 5,03E-01 |
| <i>LSM2</i>            | -1,03 | 2,31E-01 | 5,03E-01 |
| <i>THC2323609</i>      | 1,04  | 2,31E-01 | 5,03E-01 |
| <i>FRMD4A</i>          | 1,07  | 2,32E-01 | 5,03E-01 |
| <i>CATSPER1</i>        | -1,06 | 2,32E-01 | 5,03E-01 |
| <i>MYEOV</i>           | 1,03  | 2,32E-01 | 5,03E-01 |
| <i>AES</i>             | -1,08 | 2,32E-01 | 5,04E-01 |
| <i>A_24_P84048</i>     | -1,04 | 2,32E-01 | 5,04E-01 |
| <i>KIR2DS1</i>         | -1,04 | 2,32E-01 | 5,04E-01 |

|                        |       |          |          |
|------------------------|-------|----------|----------|
| <i>CAMKK2</i>          | 1,04  | 2,32E-01 | 5,04E-01 |
| <i>THC2427590</i>      | 1,04  | 2,32E-01 | 5,04E-01 |
| <i>KATNB1</i>          | 1,05  | 2,32E-01 | 5,04E-01 |
| <i>C12orf48</i>        | -1,11 | 2,32E-01 | 5,04E-01 |
| <i>SLC25A16</i>        | 1,05  | 2,32E-01 | 5,04E-01 |
| <i>C6orf72</i>         | 1,04  | 2,32E-01 | 5,04E-01 |
| <i>PARVA</i>           | -1,08 | 2,32E-01 | 5,04E-01 |
| <i>THC2418195</i>      | -1,05 | 2,32E-01 | 5,04E-01 |
| <i>A_24_P127082</i>    | -1,05 | 2,32E-01 | 5,04E-01 |
| <i>THC2283618</i>      | 1,04  | 2,32E-01 | 5,04E-01 |
| <i>ENST00000371030</i> | -1,11 | 2,32E-01 | 5,04E-01 |
| <i>A_24_P560088</i>    | 1,06  | 2,32E-01 | 5,04E-01 |
| <i>C18orf26</i>        | -1,05 | 2,32E-01 | 5,04E-01 |
| <i>ASCL3</i>           | 1,04  | 2,32E-01 | 5,04E-01 |
| <i>LOC283859</i>       | -1,05 | 2,32E-01 | 5,04E-01 |
| <i>AK023104</i>        | -1,05 | 2,32E-01 | 5,04E-01 |
| <i>COL23A1</i>         | -1,09 | 2,32E-01 | 5,04E-01 |
| <i>KRT28</i>           | 1,04  | 2,32E-01 | 5,04E-01 |
| <i>SLC34A2</i>         | 1,04  | 2,32E-01 | 5,04E-01 |
| <i>LYPLA1</i>          | 1,05  | 2,32E-01 | 5,04E-01 |
| <i>AF051164</i>        | 1,05  | 2,32E-01 | 5,04E-01 |
| <i>FLJ32447</i>        | 1,05  | 2,32E-01 | 5,04E-01 |
| <i>WWC1</i>            | 1,14  | 2,32E-01 | 5,04E-01 |
| <i>LOC151878</i>       | 1,09  | 2,33E-01 | 5,04E-01 |
| <i>AF119908</i>        | -1,04 | 2,33E-01 | 5,05E-01 |
| <i>UBAP1</i>           | 1,04  | 2,33E-01 | 5,05E-01 |
| <i>APBB1</i>           | 1,05  | 2,33E-01 | 5,05E-01 |
| <i>AF116611</i>        | 1,05  | 2,33E-01 | 5,05E-01 |
| <i>BU661610</i>        | -1,10 | 2,33E-01 | 5,05E-01 |
| <i>HIST1H3I</i>        | 1,13  | 2,33E-01 | 5,05E-01 |
| <i>ENST00000379563</i> | -1,09 | 2,33E-01 | 5,05E-01 |
| <i>ADH5</i>            | -1,05 | 2,33E-01 | 5,05E-01 |
| <i>A_24_P937062</i>    | 1,04  | 2,33E-01 | 5,05E-01 |
| <i>AL547361</i>        | 1,05  | 2,33E-01 | 5,05E-01 |
| <i>ERBB4</i>           | 1,09  | 2,33E-01 | 5,05E-01 |
| <i>THC2443723</i>      | -1,05 | 2,33E-01 | 5,05E-01 |
| <i>BG007597</i>        | -1,07 | 2,33E-01 | 5,05E-01 |
| <i>AF268613</i>        | -1,05 | 2,33E-01 | 5,05E-01 |
| <i>C6orf52</i>         | -1,03 | 2,33E-01 | 5,05E-01 |
| <i>TACSTD1</i>         | -1,13 | 2,33E-01 | 5,05E-01 |
| <i>CREB3L1</i>         | -1,10 | 2,33E-01 | 5,05E-01 |
| <i>C9orf64</i>         | -1,07 | 2,33E-01 | 5,05E-01 |
| <i>C1orf145</i>        | -1,06 | 2,33E-01 | 5,05E-01 |
| <i>A_23_P13232</i>     | -1,05 | 2,33E-01 | 5,05E-01 |

|                        |       |          |          |
|------------------------|-------|----------|----------|
| <i>BC043357</i>        | -1,04 | 2,33E-01 | 5,05E-01 |
| <i>AF116720</i>        | 1,03  | 2,33E-01 | 5,05E-01 |
| <i>ZP4</i>             | 1,04  | 2,33E-01 | 5,05E-01 |
| <i>PRDX6</i>           | 1,07  | 2,33E-01 | 5,05E-01 |
| <i>AK097371</i>        | 1,07  | 2,33E-01 | 5,05E-01 |
| <i>DA234975</i>        | 1,07  | 2,33E-01 | 5,05E-01 |
| <i>CAPNS1</i>          | 1,04  | 2,33E-01 | 5,05E-01 |
| <i>ROPN1L</i>          | 1,05  | 2,33E-01 | 5,05E-01 |
| <i>PTPRT</i>           | 1,09  | 2,33E-01 | 5,05E-01 |
| <i>GDI2</i>            | -1,04 | 2,33E-01 | 5,05E-01 |
| <i>UBE2F</i>           | 1,04  | 2,33E-01 | 5,05E-01 |
| <i>A_32_P139021</i>    | 1,13  | 2,33E-01 | 5,05E-01 |
| <i>ROCK2</i>           | 1,05  | 2,33E-01 | 5,05E-01 |
| <i>AK095260</i>        | 1,05  | 2,33E-01 | 5,05E-01 |
| <i>AF116616</i>        | 1,06  | 2,33E-01 | 5,05E-01 |
| <i>RAVER2</i>          | 1,06  | 2,33E-01 | 5,05E-01 |
| <i>A_24_P700170</i>    | 1,04  | 2,34E-01 | 5,05E-01 |
| <i>SUMO2</i>           | -1,03 | 2,34E-01 | 5,05E-01 |
| <i>LOC644134</i>       | 1,04  | 2,34E-01 | 5,06E-01 |
| <i>ENST00000381050</i> | 1,04  | 2,34E-01 | 5,06E-01 |
| <i>CD177</i>           | -1,12 | 2,34E-01 | 5,06E-01 |
| <i>A_24_P714316</i>    | 1,06  | 2,34E-01 | 5,06E-01 |
| <i>PPAP2C</i>          | -1,08 | 2,34E-01 | 5,06E-01 |
| <i>TSP50</i>           | -1,07 | 2,34E-01 | 5,06E-01 |
| <i>IFITM1</i>          | -1,07 | 2,34E-01 | 5,06E-01 |
| <i>A_24_P944810</i>    | -1,05 | 2,34E-01 | 5,06E-01 |
| <i>A_24_P736617</i>    | -1,05 | 2,34E-01 | 5,06E-01 |
| <i>RAX</i>             | 1,03  | 2,34E-01 | 5,06E-01 |
| <i>FBXL17</i>          | 1,06  | 2,34E-01 | 5,06E-01 |
| <i>AW276844</i>        | 1,04  | 2,34E-01 | 5,06E-01 |
| <i>CR591289</i>        | -1,06 | 2,34E-01 | 5,06E-01 |
| <i>HTR3A</i>           | -1,03 | 2,34E-01 | 5,06E-01 |
| <i>ATPAF1</i>          | 1,04  | 2,34E-01 | 5,06E-01 |
| <i>C1orf162</i>        | -1,10 | 2,34E-01 | 5,06E-01 |
| <i>MAP3K7IP2</i>       | -1,05 | 2,34E-01 | 5,07E-01 |
| <i>FRAT1</i>           | 1,04  | 2,34E-01 | 5,07E-01 |
| <i>NID1</i>            | 1,07  | 2,35E-01 | 5,07E-01 |
| <i>A_24_P238426</i>    | -1,04 | 2,35E-01 | 5,07E-01 |
| <i>THC2275506</i>      | -1,04 | 2,35E-01 | 5,07E-01 |
| <i>LOC644424</i>       | -1,10 | 2,35E-01 | 5,07E-01 |
| <i>SMARCA3</i>         | -1,05 | 2,35E-01 | 5,07E-01 |
| <i>ZDHHC16</i>         | -1,08 | 2,35E-01 | 5,07E-01 |
| <i>EFCBP1</i>          | -1,10 | 2,35E-01 | 5,07E-01 |
| <i>A_24_P187340</i>    | 1,05  | 2,35E-01 | 5,07E-01 |



|                        |       |          |          |
|------------------------|-------|----------|----------|
| <i>METTL2A</i>         | 1,04  | 2,35E-01 | 5,07E-01 |
| <i>BC035363</i>        | 1,05  | 2,35E-01 | 5,07E-01 |
| <i>AK094981</i>        | -1,05 | 2,35E-01 | 5,07E-01 |
| <i>PRLH</i>            | 1,04  | 2,35E-01 | 5,07E-01 |
| <i>ANKRD13B</i>        | -1,05 | 2,35E-01 | 5,07E-01 |
| <i>A_24_P931713</i>    | 1,04  | 2,35E-01 | 5,07E-01 |
| <i>IL10</i>            | -1,09 | 2,35E-01 | 5,07E-01 |
| <i>THC2315764</i>      | 1,04  | 2,35E-01 | 5,07E-01 |
| <i>GRAMD1C</i>         | 1,16  | 2,35E-01 | 5,07E-01 |
| <i>BC030083</i>        | -1,11 | 2,35E-01 | 5,07E-01 |
| <i>THC2317058</i>      | -1,08 | 2,35E-01 | 5,07E-01 |
| <i>A_32_P21742</i>     | 1,04  | 2,35E-01 | 5,07E-01 |
| <i>ENST00000312037</i> | 1,06  | 2,35E-01 | 5,07E-01 |
| <i>MYOM3</i>           | 1,04  | 2,35E-01 | 5,07E-01 |
| <i>CR620185</i>        | -1,19 | 2,35E-01 | 5,07E-01 |
| <i>RGS20</i>           | -1,08 | 2,35E-01 | 5,07E-01 |
| <i>RNMTL1</i>          | -1,05 | 2,35E-01 | 5,07E-01 |
| <i>THC2400654</i>      | 1,05  | 2,35E-01 | 5,07E-01 |
| <i>KIF14</i>           | 1,05  | 2,35E-01 | 5,07E-01 |
| <i>AHCYL1</i>          | 1,06  | 2,35E-01 | 5,07E-01 |
| <i>BC034812</i>        | -1,11 | 2,35E-01 | 5,08E-01 |
| <i>TMCO1</i>           | -1,05 | 2,36E-01 | 5,08E-01 |
| <i>LOC643037</i>       | 1,05  | 2,36E-01 | 5,08E-01 |
| <i>CBR1</i>            | -1,07 | 2,36E-01 | 5,08E-01 |
| <i>SH3PXD2B</i>        | -1,07 | 2,36E-01 | 5,08E-01 |
| <i>AY358648</i>        | -1,04 | 2,36E-01 | 5,08E-01 |
| <i>FAM63A</i>          | -1,05 | 2,36E-01 | 5,08E-01 |
| <i>A_32_P221641</i>    | 1,08  | 2,36E-01 | 5,08E-01 |
| <i>ARMCX5</i>          | -1,05 | 2,36E-01 | 5,08E-01 |
| <i>AL137475</i>        | -1,05 | 2,36E-01 | 5,08E-01 |
| <i>CNP</i>             | -1,04 | 2,36E-01 | 5,08E-01 |
| <i>B4GALNT2</i>        | -1,03 | 2,36E-01 | 5,08E-01 |
| <i>BANK1</i>           | -1,09 | 2,36E-01 | 5,08E-01 |
| <i>KIAA1274</i>        | 1,07  | 2,36E-01 | 5,08E-01 |
| <i>ENST00000351050</i> | -1,05 | 2,36E-01 | 5,08E-01 |
| <i>LPO</i>             | 1,04  | 2,36E-01 | 5,08E-01 |
| <i>IDH3B</i>           | 1,04  | 2,36E-01 | 5,08E-01 |
| <i>BM683477</i>        | 1,06  | 2,36E-01 | 5,08E-01 |
| <i>THBS2</i>           | 1,14  | 2,36E-01 | 5,08E-01 |
| <i>TYROBP</i>          | -1,10 | 2,36E-01 | 5,09E-01 |
| <i>OXT</i>             | 1,08  | 2,36E-01 | 5,09E-01 |
| <i>KRTAP3-2</i>        | 1,04  | 2,36E-01 | 5,09E-01 |
| <i>OPN3</i>            | 1,08  | 2,36E-01 | 5,09E-01 |
| <i>BX110656</i>        | -1,04 | 2,36E-01 | 5,09E-01 |

|                        |       |          |          |
|------------------------|-------|----------|----------|
| <i>GSTO1</i>           | 1,04  | 2,36E-01 | 5,09E-01 |
| <i>MGC33530</i>        | 1,06  | 2,36E-01 | 5,09E-01 |
| <i>L3MBTL3</i>         | -1,08 | 2,36E-01 | 5,09E-01 |
| <i>A_24_P941185</i>    | -1,05 | 2,36E-01 | 5,09E-01 |
| <i>SNF8</i>            | 1,05  | 2,36E-01 | 5,09E-01 |
| <i>SYT7</i>            | 1,05  | 2,36E-01 | 5,09E-01 |
| <i>PRG4</i>            | 1,20  | 2,36E-01 | 5,09E-01 |
| <i>THC2274074</i>      | -1,08 | 2,37E-01 | 5,09E-01 |
| <i>HDGF2</i>           | -1,04 | 2,37E-01 | 5,09E-01 |
| <i>FAM57A</i>          | -1,10 | 2,37E-01 | 5,10E-01 |
| <i>A_24_P32646</i>     | -1,08 | 2,37E-01 | 5,10E-01 |
| <i>ENST00000356196</i> | -1,06 | 2,37E-01 | 5,10E-01 |
| <i>CRSP3</i>           | -1,05 | 2,37E-01 | 5,10E-01 |
| <i>APOBEC2</i>         | -1,05 | 2,37E-01 | 5,10E-01 |
| <i>U50537</i>          | 1,06  | 2,37E-01 | 5,10E-01 |
| <i>CYSLTR1</i>         | 1,15  | 2,37E-01 | 5,10E-01 |
| <i>C20orf82</i>        | 1,18  | 2,37E-01 | 5,10E-01 |
| <i>SLC25A11</i>        | 1,06  | 2,37E-01 | 5,10E-01 |
| <i>TXLNB</i>           | 1,15  | 2,37E-01 | 5,10E-01 |
| <i>SSX3</i>            | 1,06  | 2,37E-01 | 5,10E-01 |
| <i>SR-A1</i>           | -1,04 | 2,37E-01 | 5,10E-01 |
| <i>AA071045</i>        | 1,04  | 2,37E-01 | 5,10E-01 |
| <i>A_24_P213325</i>    | -1,05 | 2,37E-01 | 5,10E-01 |
| <i>Gcom1</i>           | -1,20 | 2,37E-01 | 5,10E-01 |
| <i>C1orf115</i>        | -1,08 | 2,37E-01 | 5,10E-01 |
| <i>AI089783</i>        | -1,07 | 2,37E-01 | 5,10E-01 |
| <i>FLJ20054</i>        | -1,06 | 2,37E-01 | 5,10E-01 |
| <i>POU6F1</i>          | -1,05 | 2,37E-01 | 5,10E-01 |
| <i>BU930695</i>        | 1,04  | 2,37E-01 | 5,10E-01 |
| <i>CMTM4</i>           | 1,05  | 2,37E-01 | 5,10E-01 |
| <i>FER</i>             | 1,05  | 2,37E-01 | 5,10E-01 |
| <i>DLX4</i>            | 1,07  | 2,37E-01 | 5,10E-01 |
| <i>AA451906</i>        | 1,09  | 2,37E-01 | 5,10E-01 |
| <i>DCP_1_1</i>         | 1,13  | 2,37E-01 | 5,10E-01 |
| <i>THC2343493</i>      | -1,05 | 2,38E-01 | 5,10E-01 |
| <i>PGM3</i>            | 1,13  | 2,38E-01 | 5,10E-01 |
| <i>BU679017</i>        | -1,04 | 2,38E-01 | 5,10E-01 |
| <i>ENST00000277647</i> | -1,04 | 2,38E-01 | 5,10E-01 |
| <i>BC016872</i>        | 1,04  | 2,38E-01 | 5,10E-01 |
| <i>LZIC</i>            | 1,04  | 2,38E-01 | 5,10E-01 |
| <i>AI523154</i>        | 1,09  | 2,38E-01 | 5,11E-01 |
| <i>AACS</i>            | -1,06 | 2,38E-01 | 5,11E-01 |
| <i>RPL31</i>           | -1,06 | 2,38E-01 | 5,11E-01 |
| <i>CARKL</i>           | -1,08 | 2,38E-01 | 5,11E-01 |

|                        |       |          |          |
|------------------------|-------|----------|----------|
| <i>C10orf65</i>        | 1,05  | 2,38E-01 | 5,11E-01 |
| <i>LOC92482</i>        | -1,06 | 2,38E-01 | 5,11E-01 |
| <i>BC023330</i>        | -1,04 | 2,38E-01 | 5,11E-01 |
| <i>MYBPH</i>           | -1,05 | 2,38E-01 | 5,11E-01 |
| <i>FLJ37396</i>        | 1,05  | 2,38E-01 | 5,11E-01 |
| <i>BC014871</i>        | -1,10 | 2,38E-01 | 5,11E-01 |
| <i>H1FO</i>            | -1,10 | 2,38E-01 | 5,11E-01 |
| <i>RIMBP2</i>          | -1,06 | 2,38E-01 | 5,11E-01 |
| <i>TOR1AIP2</i>        | 1,06  | 2,38E-01 | 5,11E-01 |
| <i>WBSCR19</i>         | -1,04 | 2,38E-01 | 5,11E-01 |
| <i>AI700316</i>        | -1,04 | 2,38E-01 | 5,11E-01 |
| <i>ANKRD16</i>         | -1,05 | 2,38E-01 | 5,11E-01 |
| <i>C20orf197</i>       | 1,04  | 2,38E-01 | 5,11E-01 |
| <i>ENST00000330370</i> | -1,05 | 2,38E-01 | 5,11E-01 |
| <i>ASH2L</i>           | -1,04 | 2,38E-01 | 5,11E-01 |
| <i>CCKAR</i>           | -1,05 | 2,39E-01 | 5,11E-01 |
| <i>FLJ20184</i>        | -1,04 | 2,39E-01 | 5,11E-01 |
| <i>METTL8</i>          | 1,05  | 2,39E-01 | 5,11E-01 |
| <i>SERPINA5</i>        | -1,09 | 2,39E-01 | 5,11E-01 |
| <i>AF086448</i>        | -1,04 | 2,39E-01 | 5,12E-01 |
| <i>BU608568</i>        | -1,05 | 2,39E-01 | 5,12E-01 |
| <i>CAPN13</i>          | 1,03  | 2,39E-01 | 5,12E-01 |
| <i>LRRC25</i>          | -1,08 | 2,39E-01 | 5,12E-01 |
| <i>AW383740</i>        | -1,07 | 2,39E-01 | 5,12E-01 |
| <i>SARM1</i>           | -1,07 | 2,39E-01 | 5,12E-01 |
| <i>ENST00000373816</i> | -1,04 | 2,39E-01 | 5,12E-01 |
| <i>CDC40</i>           | -1,03 | 2,39E-01 | 5,12E-01 |
| <i>RFFL</i>            | 1,04  | 2,39E-01 | 5,12E-01 |
| <i>THC2410251</i>      | 1,12  | 2,39E-01 | 5,12E-01 |
| <i>BC064982</i>        | -1,06 | 2,39E-01 | 5,12E-01 |
| <i>C17orf63</i>        | -1,04 | 2,39E-01 | 5,12E-01 |
| <i>ENST00000323716</i> | -1,04 | 2,39E-01 | 5,12E-01 |
| <i>FLJ10357</i>        | -1,06 | 2,39E-01 | 5,12E-01 |
| <i>AF090933</i>        | 1,04  | 2,39E-01 | 5,12E-01 |
| <i>ZNF197</i>          | -1,05 | 2,39E-01 | 5,12E-01 |
| <i>DEFB118</i>         | 1,04  | 2,39E-01 | 5,13E-01 |
| <i>TRIM9</i>           | -1,09 | 2,39E-01 | 5,13E-01 |
| <i>LOC161247</i>       | 1,04  | 2,39E-01 | 5,13E-01 |
| <i>C1orf94</i>         | -1,05 | 2,39E-01 | 5,13E-01 |
| <i>C8orf78</i>         | 1,05  | 2,39E-01 | 5,13E-01 |
| <i>CTNNA3</i>          | -1,04 | 2,40E-01 | 5,13E-01 |
| <i>PHOX2A</i>          | 1,09  | 2,40E-01 | 5,13E-01 |
| <i>TSTA3</i>           | 1,04  | 2,40E-01 | 5,13E-01 |
| <i>BC036938</i>        | 1,06  | 2,40E-01 | 5,13E-01 |

|                        |       |          |          |
|------------------------|-------|----------|----------|
| <i>THC2405170</i>      | -1,05 | 2,40E-01 | 5,13E-01 |
| <i>A_32_P132928</i>    | -1,04 | 2,40E-01 | 5,13E-01 |
| <i>ELOVL6</i>          | -1,07 | 2,40E-01 | 5,13E-01 |
| <i>AK056348</i>        | 1,04  | 2,40E-01 | 5,13E-01 |
| <i>COPS7B</i>          | -1,05 | 2,40E-01 | 5,13E-01 |
| <i>SCARF2</i>          | 1,06  | 2,40E-01 | 5,13E-01 |
| <i>PON1</i>            | -1,04 | 2,40E-01 | 5,13E-01 |
| <i>THC2423311</i>      | 1,04  | 2,40E-01 | 5,13E-01 |
| <i>PTPRM</i>           | 1,05  | 2,40E-01 | 5,13E-01 |
| <i>THTPA</i>           | -1,05 | 2,40E-01 | 5,13E-01 |
| <i>EDEM2</i>           | -1,04 | 2,40E-01 | 5,13E-01 |
| <i>C14orf161</i>       | -1,06 | 2,40E-01 | 5,14E-01 |
| <i>BTBD7</i>           | -1,03 | 2,40E-01 | 5,14E-01 |
| <i>CGREF1</i>          | -1,26 | 2,40E-01 | 5,14E-01 |
| <i>AX721098</i>        | -1,21 | 2,40E-01 | 5,14E-01 |
| <i>SMC1B</i>           | -1,05 | 2,40E-01 | 5,14E-01 |
| <i>THC2341745</i>      | -1,04 | 2,40E-01 | 5,14E-01 |
| <i>THC2345241</i>      | 1,05  | 2,40E-01 | 5,14E-01 |
| <i>G3BP</i>            | 1,07  | 2,40E-01 | 5,14E-01 |
| <i>CS</i>              | 1,04  | 2,40E-01 | 5,14E-01 |
| <i>THC2443848</i>      | 1,05  | 2,40E-01 | 5,14E-01 |
| <i>LGR4</i>            | 1,06  | 2,40E-01 | 5,14E-01 |
| <i>EFHA1</i>           | -1,05 | 2,40E-01 | 5,14E-01 |
| <i>ILDR1</i>           | -1,10 | 2,41E-01 | 5,14E-01 |
| <i>HSD17B3</i>         | -1,05 | 2,41E-01 | 5,14E-01 |
| <i>SLC17A3</i>         | -1,05 | 2,41E-01 | 5,14E-01 |
| <i>EEF1G</i>           | -1,04 | 2,41E-01 | 5,14E-01 |
| <i>A_24_P928208</i>    | 1,04  | 2,41E-01 | 5,14E-01 |
| <i>ENST00000318251</i> | 1,08  | 2,41E-01 | 5,14E-01 |
| <i>FLJ21865</i>        | -1,06 | 2,41E-01 | 5,14E-01 |
| <i>HSAJ2425</i>        | 1,05  | 2,41E-01 | 5,14E-01 |
| <i>RTN4R</i>           | -1,10 | 2,41E-01 | 5,14E-01 |
| <i>EXT2</i>            | -1,04 | 2,41E-01 | 5,14E-01 |
| <i>A_32_P117884</i>    | 1,04  | 2,41E-01 | 5,14E-01 |
| <i>CTSH</i>            | -1,14 | 2,41E-01 | 5,14E-01 |
| <i>PLA2G5</i>          | -1,14 | 2,41E-01 | 5,15E-01 |
| <i>HARS</i>            | 1,03  | 2,41E-01 | 5,15E-01 |
| <i>CR607634</i>        | 1,04  | 2,41E-01 | 5,15E-01 |
| <i>FAM44A</i>          | 1,05  | 2,41E-01 | 5,15E-01 |
| <i>TOMM20</i>          | 1,06  | 2,41E-01 | 5,15E-01 |
| <i>A_24_P384210</i>    | 1,16  | 2,41E-01 | 5,15E-01 |
| <i>37316</i>           | 1,12  | 2,41E-01 | 5,15E-01 |
| <i>AK000085</i>        | -1,05 | 2,41E-01 | 5,15E-01 |
| <i>BE767612</i>        | 1,05  | 2,41E-01 | 5,15E-01 |

|                        |       |          |          |
|------------------------|-------|----------|----------|
| <i>QSER1</i>           | 1,07  | 2,41E-01 | 5,15E-01 |
| <i>OR51G1</i>          | 1,56  | 2,41E-01 | 5,15E-01 |
| <i>LOC283767</i>       | -1,10 | 2,41E-01 | 5,15E-01 |
| <i>RPL34</i>           | -1,05 | 2,41E-01 | 5,15E-01 |
| <i>A_24_P911734</i>    | 1,04  | 2,41E-01 | 5,15E-01 |
| <i>RPS16</i>           | -1,05 | 2,41E-01 | 5,15E-01 |
| <i>PRDM7</i>           | -1,05 | 2,41E-01 | 5,15E-01 |
| <i>TMEM20</i>          | -1,05 | 2,41E-01 | 5,15E-01 |
| <i>MGC10911</i>        | -1,05 | 2,41E-01 | 5,15E-01 |
| <i>AK024930</i>        | 1,06  | 2,41E-01 | 5,15E-01 |
| <i>A_32_P101073</i>    | 1,06  | 2,41E-01 | 5,15E-01 |
| <i>USP36</i>           | 1,15  | 2,42E-01 | 5,15E-01 |
| <i>MULK</i>            | 1,04  | 2,42E-01 | 5,15E-01 |
| <i>GYG1</i>            | 1,10  | 2,42E-01 | 5,15E-01 |
| <i>BE467780</i>        | -1,05 | 2,42E-01 | 5,15E-01 |
| <i>WDR46</i>           | -1,04 | 2,42E-01 | 5,15E-01 |
| <i>SELI</i>            | -1,06 | 2,42E-01 | 5,15E-01 |
| <i>AF088007</i>        | -1,06 | 2,42E-01 | 5,15E-01 |
| <i>THC2265840</i>      | -1,07 | 2,42E-01 | 5,15E-01 |
| <i>FLJ14834</i>        | 1,17  | 2,42E-01 | 5,15E-01 |
| <i>CX62</i>            | 1,04  | 2,42E-01 | 5,15E-01 |
| <i>IRS4</i>            | -1,08 | 2,42E-01 | 5,15E-01 |
| <i>CR610759</i>        | 1,10  | 2,42E-01 | 5,15E-01 |
| <i>PKDREJ</i>          | -1,07 | 2,42E-01 | 5,15E-01 |
| <i>SUSD2</i>           | 1,18  | 2,42E-01 | 5,15E-01 |
| <i>DA292134</i>        | 1,06  | 2,42E-01 | 5,16E-01 |
| <i>AA837799</i>        | -1,24 | 2,42E-01 | 5,16E-01 |
| <i>A_32_P136427</i>    | -1,04 | 2,42E-01 | 5,16E-01 |
| <i>SNRPG</i>           | 1,06  | 2,42E-01 | 5,16E-01 |
| <i>TMC6</i>            | -1,05 | 2,42E-01 | 5,16E-01 |
| <i>MGC15875</i>        | -1,05 | 2,42E-01 | 5,16E-01 |
| <i>BU602485</i>        | 1,05  | 2,42E-01 | 5,16E-01 |
| <i>VDAC1</i>           | 1,06  | 2,42E-01 | 5,16E-01 |
| <i>C1orf93</i>         | -1,06 | 2,42E-01 | 5,16E-01 |
| <i>AT_D_M</i>          | 1,03  | 2,42E-01 | 5,16E-01 |
| <i>ENST00000330899</i> | 1,05  | 2,42E-01 | 5,16E-01 |
| <i>GALNT3</i>          | -1,07 | 2,42E-01 | 5,16E-01 |
| <i>MAOA</i>            | 1,10  | 2,42E-01 | 5,16E-01 |
| <i>AY358109</i>        | -1,04 | 2,42E-01 | 5,16E-01 |
| <i>A_24_P93184</i>     | 1,04  | 2,42E-01 | 5,16E-01 |
| <i>AI613259</i>        | 1,05  | 2,42E-01 | 5,16E-01 |
| <i>A_24_P714707</i>    | 1,07  | 2,42E-01 | 5,16E-01 |
| <i>ZNHIT3</i>          | -1,05 | 2,43E-01 | 5,16E-01 |
| <i>ST6GALNAC6</i>      | 1,07  | 2,43E-01 | 5,16E-01 |

|                        |       |          |          |
|------------------------|-------|----------|----------|
| <i>C14orf106</i>       | -1,07 | 2,43E-01 | 5,16E-01 |
| <i>A_24_P710868</i>    | -1,05 | 2,43E-01 | 5,16E-01 |
| <i>NAV3</i>            | -1,07 | 2,43E-01 | 5,16E-01 |
| <i>PHF20L1</i>         | -1,04 | 2,43E-01 | 5,16E-01 |
| <i>A_24_P934316</i>    | 1,05  | 2,43E-01 | 5,16E-01 |
| <i>GTDC1</i>           | 1,07  | 2,43E-01 | 5,16E-01 |
| <i>LOC400707</i>       | -1,07 | 2,43E-01 | 5,16E-01 |
| <i>NCKAP1L</i>         | -1,07 | 2,43E-01 | 5,16E-01 |
| <i>ENST00000253380</i> | -1,05 | 2,43E-01 | 5,16E-01 |
| <i>DCP_1_7</i>         | 1,13  | 2,43E-01 | 5,16E-01 |
| <i>TLE1</i>            | -1,09 | 2,43E-01 | 5,16E-01 |
| <i>THC2371471</i>      | 1,05  | 2,43E-01 | 5,16E-01 |
| <i>ASMT</i>            | -1,06 | 2,43E-01 | 5,16E-01 |
| <i>TRUB2</i>           | -1,04 | 2,43E-01 | 5,16E-01 |
| <i>THC2285529</i>      | -1,04 | 2,43E-01 | 5,16E-01 |
| <i>ENST00000246872</i> | -1,03 | 2,43E-01 | 5,16E-01 |
| <i>PSMA2</i>           | 1,03  | 2,43E-01 | 5,16E-01 |
| <i>CB050471</i>        | 1,05  | 2,43E-01 | 5,16E-01 |
| <i>PLEKHG4</i>         | 1,09  | 2,43E-01 | 5,16E-01 |
| <i>ZNF542</i>          | 1,07  | 2,43E-01 | 5,16E-01 |
| <i>AK097079</i>        | 1,05  | 2,43E-01 | 5,17E-01 |
| <i>GALC</i>            | -1,06 | 2,43E-01 | 5,17E-01 |
| <i>BG191465</i>        | 1,15  | 2,43E-01 | 5,17E-01 |
| <i>A_32_P109495</i>    | -1,10 | 2,43E-01 | 5,17E-01 |
| <i>NP106190</i>        | 1,04  | 2,43E-01 | 5,17E-01 |
| <i>GIPC3</i>           | 1,05  | 2,43E-01 | 5,17E-01 |
| <i>CR603184</i>        | 1,06  | 2,43E-01 | 5,17E-01 |
| <i>THC2438309</i>      | 1,09  | 2,44E-01 | 5,17E-01 |
| <i>ENST00000332361</i> | -1,04 | 2,44E-01 | 5,17E-01 |
| <i>PACS2</i>           | 1,04  | 2,44E-01 | 5,17E-01 |
| <i>CHUK</i>            | 1,04  | 2,44E-01 | 5,17E-01 |
| <i>RFC4</i>            | -1,04 | 2,44E-01 | 5,17E-01 |
| <i>LOC642707</i>       | 1,04  | 2,44E-01 | 5,17E-01 |
| <i>EIF4E2</i>          | 1,05  | 2,44E-01 | 5,17E-01 |
| <i>WNT3</i>            | -1,06 | 2,44E-01 | 5,17E-01 |
| <i>RBPSUH</i>          | -1,04 | 2,44E-01 | 5,17E-01 |
| <i>CYBRD1</i>          | -1,10 | 2,44E-01 | 5,17E-01 |
| <i>AK093340</i>        | -1,06 | 2,44E-01 | 5,17E-01 |
| <i>A_24_P889886</i>    | -1,04 | 2,44E-01 | 5,17E-01 |
| <i>STK19</i>           | 1,03  | 2,44E-01 | 5,17E-01 |
| <i>NUP62CL</i>         | -1,05 | 2,44E-01 | 5,17E-01 |
| <i>THC2352745</i>      | 1,06  | 2,44E-01 | 5,17E-01 |
| <i>ENST00000319902</i> | -1,06 | 2,44E-01 | 5,18E-01 |
| <i>USP38</i>           | 1,05  | 2,44E-01 | 5,18E-01 |

|                        |       |          |          |
|------------------------|-------|----------|----------|
| <i>ENST00000333582</i> | 1,05  | 2,44E-01 | 5,18E-01 |
| <i>SPON1</i>           | -1,17 | 2,44E-01 | 5,18E-01 |
| <i>THC2308304</i>      | -1,05 | 2,44E-01 | 5,18E-01 |
| <i>BF508144</i>        | -1,08 | 2,44E-01 | 5,18E-01 |
| <i>TIAL1</i>           | 1,04  | 2,44E-01 | 5,18E-01 |
| <i>ENST00000251375</i> | -1,07 | 2,45E-01 | 5,18E-01 |
| <i>NUPR1</i>           | -1,07 | 2,45E-01 | 5,18E-01 |
| <i>TSPAN1</i>          | 1,07  | 2,45E-01 | 5,18E-01 |
| <i>C4orf7</i>          | 1,04  | 2,45E-01 | 5,18E-01 |
| <i>PARP3</i>           | -1,06 | 2,45E-01 | 5,19E-01 |
| <i>CTDSPL2</i>         | -1,03 | 2,45E-01 | 5,19E-01 |
| <i>MTX2</i>            | -1,05 | 2,45E-01 | 5,19E-01 |
| <i>C10orf119</i>       | -1,04 | 2,45E-01 | 5,19E-01 |
| <i>DEPDC1</i>          | 1,04  | 2,45E-01 | 5,19E-01 |
| <i>EIF1AX</i>          | 1,05  | 2,45E-01 | 5,19E-01 |
| <i>TIMM8A</i>          | -1,04 | 2,45E-01 | 5,19E-01 |
| <i>BC014265</i>        | 1,05  | 2,45E-01 | 5,19E-01 |
| <i>EFCBP2</i>          | 1,05  | 2,45E-01 | 5,19E-01 |
| <i>AK024243</i>        | -1,09 | 2,45E-01 | 5,19E-01 |
| <i>THC2379964</i>      | -1,04 | 2,45E-01 | 5,19E-01 |
| <i>DDN</i>             | 1,04  | 2,45E-01 | 5,19E-01 |
| <i>ENST00000339700</i> | 1,05  | 2,45E-01 | 5,19E-01 |
| <i>THC2303846</i>      | 1,05  | 2,45E-01 | 5,19E-01 |
| <i>DHRS10</i>          | 1,08  | 2,45E-01 | 5,19E-01 |
| <i>SAGE1</i>           | -1,04 | 2,45E-01 | 5,19E-01 |
| <i>TMLHE</i>           | 1,04  | 2,45E-01 | 5,19E-01 |
| <i>PRPF38B</i>         | 1,03  | 2,45E-01 | 5,19E-01 |
| <i>APOBEC3A</i>        | 1,16  | 2,45E-01 | 5,19E-01 |
| <i>MOCS3</i>           | -1,04 | 2,45E-01 | 5,19E-01 |
| <i>BF436751</i>        | -1,05 | 2,45E-01 | 5,19E-01 |
| <i>NPM3</i>            | -1,09 | 2,45E-01 | 5,19E-01 |
| <i>SGPP1</i>           | 1,04  | 2,45E-01 | 5,19E-01 |
| <i>MLL2</i>            | 1,06  | 2,45E-01 | 5,19E-01 |
| <i>RPS15A</i>          | -1,03 | 2,46E-01 | 5,20E-01 |
| <i>IRF7</i>            | 1,10  | 2,46E-01 | 5,20E-01 |
| <i>ENST00000326831</i> | 1,04  | 2,46E-01 | 5,20E-01 |
| <i>CHAF1B</i>          | 1,04  | 2,46E-01 | 5,20E-01 |
| <i>TMEM115</i>         | 1,05  | 2,46E-01 | 5,20E-01 |
| <i>A_24_P486544</i>    | 1,06  | 2,46E-01 | 5,20E-01 |
| <i>MMP23B</i>          | 1,12  | 2,46E-01 | 5,20E-01 |
| <i>LOC51334</i>        | -1,06 | 2,46E-01 | 5,20E-01 |
| <i>ENST00000382129</i> | -1,05 | 2,46E-01 | 5,20E-01 |
| <i>SETX</i>            | -1,03 | 2,46E-01 | 5,20E-01 |
| <i>ANKRD34</i>         | 1,06  | 2,46E-01 | 5,20E-01 |

|                        |       |          |          |
|------------------------|-------|----------|----------|
| <i>C14orf72</i>        | -1,04 | 2,46E-01 | 5,20E-01 |
| <i>FMNL3</i>           | -1,03 | 2,46E-01 | 5,20E-01 |
| <i>ARHGEF17</i>        | 1,06  | 2,46E-01 | 5,20E-01 |
| <i>CRYGN</i>           | -1,06 | 2,46E-01 | 5,20E-01 |
| <i>C5orf16</i>         | 1,04  | 2,46E-01 | 5,20E-01 |
| <i>THC2340668</i>      | -1,10 | 2,46E-01 | 5,20E-01 |
| <i>HBP1</i>            | 1,07  | 2,46E-01 | 5,20E-01 |
| <i>GPR26</i>           | -1,05 | 2,46E-01 | 5,20E-01 |
| <i>CLASP1</i>          | 1,04  | 2,46E-01 | 5,20E-01 |
| <i>CHCHD7</i>          | 1,05  | 2,46E-01 | 5,20E-01 |
| <i>KIAA1543</i>        | -1,06 | 2,46E-01 | 5,20E-01 |
| <i>WDR8</i>            | -1,03 | 2,46E-01 | 5,20E-01 |
| <i>A_24_P461497</i>    | 1,14  | 2,46E-01 | 5,20E-01 |
| <i>ERAS</i>            | 1,04  | 2,46E-01 | 5,20E-01 |
| <i>A_24_P934083</i>    | -1,04 | 2,47E-01 | 5,21E-01 |
| <i>GJE1</i>            | -1,04 | 2,47E-01 | 5,21E-01 |
| <i>FXN</i>             | -1,07 | 2,47E-01 | 5,21E-01 |
| <i>A_23_P205500</i>    | 1,08  | 2,47E-01 | 5,21E-01 |
| <i>AK023895</i>        | -1,07 | 2,47E-01 | 5,21E-01 |
| <i>AF067801</i>        | -1,03 | 2,47E-01 | 5,21E-01 |
| <i>BC030122</i>        | -1,09 | 2,47E-01 | 5,21E-01 |
| <i>LOC196549</i>       | 1,05  | 2,47E-01 | 5,21E-01 |
| <i>IPO4</i>            | 1,06  | 2,47E-01 | 5,21E-01 |
| <i>THC2295607</i>      | -1,08 | 2,47E-01 | 5,21E-01 |
| <i>C10orf122</i>       | -1,05 | 2,47E-01 | 5,21E-01 |
| <i>AF361491</i>        | 1,06  | 2,47E-01 | 5,21E-01 |
| <i>C20orf186</i>       | 1,04  | 2,47E-01 | 5,21E-01 |
| <i>FLJ25680</i>        | 1,04  | 2,47E-01 | 5,21E-01 |
| <i>POLR3K</i>          | -1,06 | 2,47E-01 | 5,22E-01 |
| <i>USF2</i>            | 1,05  | 2,47E-01 | 5,22E-01 |
| <i>ANKRD25</i>         | -1,05 | 2,47E-01 | 5,22E-01 |
| <i>CNTN1</i>           | 1,10  | 2,47E-01 | 5,22E-01 |
| <i>ENST00000267857</i> | -1,13 | 2,47E-01 | 5,22E-01 |
| <i>SMCR7</i>           | -1,07 | 2,47E-01 | 5,22E-01 |
| <i>BARX1</i>           | -1,05 | 2,47E-01 | 5,22E-01 |
| <i>A_24_P143653</i>    | -1,05 | 2,47E-01 | 5,22E-01 |
| <i>A_24_P238377</i>    | -1,03 | 2,47E-01 | 5,22E-01 |
| <i>THC2269920</i>      | 1,04  | 2,47E-01 | 5,22E-01 |
| <i>BU731317</i>        | 1,05  | 2,47E-01 | 5,22E-01 |
| <i>IFIH1</i>           | 1,05  | 2,47E-01 | 5,22E-01 |
| <i>N75321</i>          | 1,06  | 2,47E-01 | 5,22E-01 |
| <i>ARHGAP28</i>        | 1,14  | 2,47E-01 | 5,22E-01 |
| <i>STIM2</i>           | 1,05  | 2,47E-01 | 5,22E-01 |
| <i>PPP4R1L</i>         | -1,05 | 2,48E-01 | 5,22E-01 |



|                        |       |          |          |
|------------------------|-------|----------|----------|
| <i>C6orf117</i>        | 1,10  | 2,48E-01 | 5,22E-01 |
| <i>TPST2</i>           | -1,06 | 2,48E-01 | 5,22E-01 |
| <i>C16orf33</i>        | -1,07 | 2,48E-01 | 5,22E-01 |
| <i>LOC650620</i>       | -1,06 | 2,48E-01 | 5,22E-01 |
| <i>DNA2L</i>           | -1,05 | 2,48E-01 | 5,22E-01 |
| <i>E1A_r60_1</i>       | 1,13  | 2,48E-01 | 5,22E-01 |
| <i>THC2345492</i>      | -1,04 | 2,48E-01 | 5,22E-01 |
| <i>C17orf53</i>        | 1,03  | 2,48E-01 | 5,22E-01 |
| <i>HTN3</i>            | 1,05  | 2,48E-01 | 5,22E-01 |
| <i>BC062780</i>        | -1,12 | 2,48E-01 | 5,22E-01 |
| <i>ENST00000304601</i> | -1,08 | 2,48E-01 | 5,22E-01 |
| <i>EMR3</i>            | 1,06  | 2,48E-01 | 5,22E-01 |
| <i>THC2282016</i>      | -1,06 | 2,48E-01 | 5,22E-01 |
| <i>THC2273298</i>      | 1,03  | 2,48E-01 | 5,22E-01 |
| <i>EPHA1</i>           | -1,07 | 2,48E-01 | 5,23E-01 |
| <i>THC2444579</i>      | -1,05 | 2,48E-01 | 5,23E-01 |
| <i>PAFAH1B2</i>        | -1,03 | 2,48E-01 | 5,23E-01 |
| <i>CR616003</i>        | 1,04  | 2,48E-01 | 5,23E-01 |
| <i>GOLGA3</i>          | -1,05 | 2,48E-01 | 5,23E-01 |
| <i>THC2278856</i>      | -1,05 | 2,48E-01 | 5,23E-01 |
| <i>BC107852</i>        | -1,10 | 2,48E-01 | 5,23E-01 |
| <i>TSGA10IP</i>        | -1,05 | 2,48E-01 | 5,23E-01 |
| <i>L24521</i>          | -1,04 | 2,48E-01 | 5,23E-01 |
| <i>BE542385</i>        | -1,05 | 2,48E-01 | 5,23E-01 |
| <i>STMN3</i>           | -1,07 | 2,48E-01 | 5,23E-01 |
| <i>A_24_P612890</i>    | -1,03 | 2,48E-01 | 5,23E-01 |
| <i>DDX56</i>           | 1,04  | 2,48E-01 | 5,23E-01 |
| <i>A_24_P11980</i>     | 1,05  | 2,48E-01 | 5,23E-01 |
| <i>DDIT3</i>           | 1,08  | 2,49E-01 | 5,23E-01 |
| <i>CR595522</i>        | 1,09  | 2,49E-01 | 5,23E-01 |
| <i>EPPK1</i>           | 1,34  | 2,49E-01 | 5,23E-01 |
| <i>A_24_P42107</i>     | 1,05  | 2,49E-01 | 5,23E-01 |
| <i>STK33</i>           | -1,13 | 2,49E-01 | 5,23E-01 |
| <i>ENST00000246024</i> | -1,07 | 2,49E-01 | 5,23E-01 |
| <i>TRPM4</i>           | 1,06  | 2,49E-01 | 5,23E-01 |
| <i>ENST00000329309</i> | -1,07 | 2,49E-01 | 5,23E-01 |
| <i>DBH</i>             | -1,12 | 2,49E-01 | 5,23E-01 |
| <i>GLI3</i>            | -1,08 | 2,49E-01 | 5,23E-01 |
| <i>XRCC1</i>           | -1,05 | 2,49E-01 | 5,23E-01 |
| <i>HSD3B1</i>          | 1,04  | 2,49E-01 | 5,23E-01 |
| <i>BX537510</i>        | 1,04  | 2,49E-01 | 5,23E-01 |
| <i>S45570</i>          | 1,05  | 2,49E-01 | 5,23E-01 |
| <i>KIRREL</i>          | 1,06  | 2,49E-01 | 5,23E-01 |
| <i>MRPL18</i>          | -1,05 | 2,49E-01 | 5,23E-01 |

|                     |       |          |          |
|---------------------|-------|----------|----------|
| <i>BC067300</i>     | -1,04 | 2,49E-01 | 5,23E-01 |
| <i>KAAG1</i>        | -1,06 | 2,49E-01 | 5,23E-01 |
| <i>WFDC2</i>        | 1,28  | 2,49E-01 | 5,23E-01 |
| <i>CXorf23</i>      | -1,04 | 2,49E-01 | 5,23E-01 |
| <i>THC2329582</i>   | 1,05  | 2,49E-01 | 5,23E-01 |
| <i>SUB1</i>         | 1,04  | 2,49E-01 | 5,23E-01 |
| <i>AK026485</i>     | -1,12 | 2,49E-01 | 5,23E-01 |
| <i>PDIA4</i>        | -1,11 | 2,49E-01 | 5,23E-01 |
| <i>IL18RAP</i>      | -1,12 | 2,49E-01 | 5,23E-01 |
| <i>M15530</i>       | -1,09 | 2,49E-01 | 5,23E-01 |
| <i>BC041926</i>     | -1,08 | 2,49E-01 | 5,23E-01 |
| <i>BG427921</i>     | -1,05 | 2,49E-01 | 5,23E-01 |
| <i>KIAA1529</i>     | 1,03  | 2,49E-01 | 5,23E-01 |
| <i>TNFSF11</i>      | 1,04  | 2,49E-01 | 5,23E-01 |
| <i>THC2277388</i>   | 1,04  | 2,49E-01 | 5,23E-01 |
| <i>COPS2</i>        | 1,05  | 2,49E-01 | 5,23E-01 |
| <i>AK097463</i>     | 1,06  | 2,49E-01 | 5,23E-01 |
| <i>WASPIP</i>       | 1,07  | 2,49E-01 | 5,23E-01 |
| <i>DCP_20_3</i>     | 1,14  | 2,49E-01 | 5,23E-01 |
| <i>A_32_P182135</i> | 1,14  | 2,49E-01 | 5,23E-01 |
| <i>GSG2</i>         | -1,04 | 2,49E-01 | 5,24E-01 |
| <i>A_24_P705701</i> | -1,04 | 2,50E-01 | 5,24E-01 |
| <i>G43356</i>       | -1,05 | 2,50E-01 | 5,24E-01 |
| <i>KCTD2</i>        | -1,04 | 2,50E-01 | 5,24E-01 |
| <i>C11orf41</i>     | -1,09 | 2,50E-01 | 5,24E-01 |
| <i>FSTL5</i>        | -1,05 | 2,50E-01 | 5,24E-01 |
| <i>CCDC6</i>        | -1,07 | 2,50E-01 | 5,24E-01 |
| <i>NAPA</i>         | 1,06  | 2,50E-01 | 5,24E-01 |
| <i>FAM3D</i>        | -1,22 | 2,50E-01 | 5,24E-01 |
| <i>ASNSD1</i>       | -1,05 | 2,50E-01 | 5,24E-01 |
| <i>A_24_P213321</i> | 1,08  | 2,50E-01 | 5,24E-01 |
| <i>CBR3</i>         | 1,06  | 2,50E-01 | 5,24E-01 |
| <i>A_24_P350126</i> | -1,04 | 2,50E-01 | 5,24E-01 |
| <i>FPR1</i>         | 1,17  | 2,50E-01 | 5,24E-01 |
| <i>MRPS14</i>       | -1,05 | 2,50E-01 | 5,24E-01 |
| <i>C11orf51</i>     | 1,09  | 2,50E-01 | 5,24E-01 |
| <i>THC2412206</i>   | -1,16 | 2,50E-01 | 5,24E-01 |
| <i>DCST2</i>        | 1,05  | 2,50E-01 | 5,24E-01 |
| <i>A_32_P132169</i> | -1,07 | 2,50E-01 | 5,24E-01 |
| <i>FLJ32575</i>     | -1,05 | 2,50E-01 | 5,24E-01 |
| <i>MRPL48</i>       | -1,04 | 2,50E-01 | 5,24E-01 |
| <i>FRMD6</i>        | -1,11 | 2,50E-01 | 5,24E-01 |
| <i>AF132973</i>     | 1,07  | 2,50E-01 | 5,24E-01 |
| <i>THC2308160</i>   | -1,13 | 2,50E-01 | 5,25E-01 |

|                        |       |          |          |
|------------------------|-------|----------|----------|
| <i>UQCR</i>            | 1,05  | 2,50E-01 | 5,25E-01 |
| <i>NCOA1</i>           | -1,04 | 2,50E-01 | 5,25E-01 |
| <i>THC2309461</i>      | 1,04  | 2,50E-01 | 5,25E-01 |
| <i>THC2311186</i>      | 1,06  | 2,51E-01 | 5,25E-01 |
| <i>RNPC3</i>           | -1,06 | 2,51E-01 | 5,25E-01 |
| <i>ZNF274</i>          | 1,04  | 2,51E-01 | 5,25E-01 |
| <i>ENST00000356170</i> | 1,05  | 2,51E-01 | 5,25E-01 |
| <i>PTPRZ1</i>          | 1,13  | 2,51E-01 | 5,25E-01 |
| <i>AP1G2</i>           | -1,04 | 2,51E-01 | 5,25E-01 |
| <i>AI885636</i>        | 1,05  | 2,51E-01 | 5,25E-01 |
| <i>AFM</i>             | 1,05  | 2,51E-01 | 5,25E-01 |
| <i>MYL2</i>            | 1,16  | 2,51E-01 | 5,25E-01 |
| <i>A_24_P33607</i>     | -1,05 | 2,51E-01 | 5,25E-01 |
| <i>MSH6</i>            | -1,04 | 2,51E-01 | 5,25E-01 |
| <i>LRRC23</i>          | 1,04  | 2,51E-01 | 5,25E-01 |
| <i>RNF138</i>          | 1,04  | 2,51E-01 | 5,25E-01 |
| <i>SPTLC2</i>          | 1,04  | 2,51E-01 | 5,25E-01 |
| <i>LOC196541</i>       | -1,03 | 2,51E-01 | 5,25E-01 |
| <i>C1RL</i>            | -1,05 | 2,51E-01 | 5,25E-01 |
| <i>ZNF546</i>          | -1,05 | 2,51E-01 | 5,25E-01 |
| <i>A_23_P105732</i>    | -1,09 | 2,51E-01 | 5,25E-01 |
| <i>THC2282002</i>      | -1,05 | 2,51E-01 | 5,25E-01 |
| <i>A_23_P89529</i>     | -1,05 | 2,51E-01 | 5,25E-01 |
| <i>AK123673</i>        | -1,21 | 2,51E-01 | 5,26E-01 |
| <i>TCL1A</i>           | -1,09 | 2,51E-01 | 5,26E-01 |
| <i>A_24_P933043</i>    | 1,04  | 2,51E-01 | 5,26E-01 |
| <i>LOC646215</i>       | 1,05  | 2,51E-01 | 5,26E-01 |
| <i>THC2281430</i>      | 1,08  | 2,51E-01 | 5,26E-01 |
| <i>BCMP11</i>          | -1,06 | 2,51E-01 | 5,26E-01 |
| <i>ENST00000331736</i> | 1,04  | 2,51E-01 | 5,26E-01 |
| <i>C14orf50</i>        | 1,06  | 2,51E-01 | 5,26E-01 |
| <i>CKAP5</i>           | -1,04 | 2,51E-01 | 5,26E-01 |
| <i>MFN1</i>            | 1,05  | 2,51E-01 | 5,26E-01 |
| <i>ENST00000325680</i> | 1,06  | 2,51E-01 | 5,26E-01 |
| <i>BC016930</i>        | -1,04 | 2,51E-01 | 5,26E-01 |
| <i>TMEM59</i>          | -1,05 | 2,52E-01 | 5,26E-01 |
| <i>AA477372</i>        | 1,04  | 2,52E-01 | 5,26E-01 |
| <i>ADSS</i>            | 1,05  | 2,52E-01 | 5,26E-01 |
| <i>GGTL4</i>           | -1,03 | 2,52E-01 | 5,26E-01 |
| <i>ZSWIM5</i>          | 1,06  | 2,52E-01 | 5,26E-01 |
| <i>FTHL17</i>          | 1,08  | 2,52E-01 | 5,26E-01 |
| <i>TJAP1</i>           | -1,04 | 2,52E-01 | 5,26E-01 |
| <i>LOC647323</i>       | 1,04  | 2,52E-01 | 5,26E-01 |
| <i>CA431053</i>        | -1,05 | 2,52E-01 | 5,26E-01 |

|                        |       |          |          |
|------------------------|-------|----------|----------|
| <i>THC2364880</i>      | 1,05  | 2,52E-01 | 5,26E-01 |
| <i>LRRN3</i>           | -1,20 | 2,52E-01 | 5,26E-01 |
| <i>A_24_P910355</i>    | 1,71  | 2,52E-01 | 5,26E-01 |
| <i>IL1RN</i>           | -1,19 | 2,52E-01 | 5,26E-01 |
| <i>AK123439</i>        | -1,07 | 2,52E-01 | 5,26E-01 |
| <i>SSFA2</i>           | 1,10  | 2,52E-01 | 5,26E-01 |
| <i>A_32_P4038</i>      | -1,06 | 2,52E-01 | 5,26E-01 |
| <i>GGCX</i>            | -1,05 | 2,52E-01 | 5,26E-01 |
| <i>ENST00000261741</i> | -1,04 | 2,52E-01 | 5,26E-01 |
| <i>ENST00000376615</i> | 1,05  | 2,52E-01 | 5,26E-01 |
| <i>PAK7</i>            | 1,06  | 2,52E-01 | 5,26E-01 |
| <i>THC2430670</i>      | 1,16  | 2,52E-01 | 5,27E-01 |
| <i>A_24_P315654</i>    | -1,04 | 2,52E-01 | 5,27E-01 |
| <i>BC030106</i>        | -1,05 | 2,52E-01 | 5,27E-01 |
| <i>RP11-218C14.6</i>   | 1,05  | 2,52E-01 | 5,27E-01 |
| <i>AK056384</i>        | -1,04 | 2,52E-01 | 5,27E-01 |
| <i>A_24_P914782</i>    | 1,05  | 2,52E-01 | 5,27E-01 |
| <i>TFPI</i>            | 1,11  | 2,52E-01 | 5,27E-01 |
| <i>AT_ssH_RR_3</i>     | 1,13  | 2,53E-01 | 5,27E-01 |
| <i>A_24_P203886</i>    | -1,34 | 2,53E-01 | 5,27E-01 |
| <i>ENST00000322831</i> | 1,04  | 2,53E-01 | 5,27E-01 |
| <i>A_24_P467871</i>    | 1,05  | 2,53E-01 | 5,27E-01 |
| <i>LOC401131</i>       | -1,11 | 2,53E-01 | 5,27E-01 |
| <i>TGFBI</i>           | 1,10  | 2,53E-01 | 5,27E-01 |
| <i>AF209507</i>        | 1,05  | 2,53E-01 | 5,27E-01 |
| <i>AK093171</i>        | 1,07  | 2,53E-01 | 5,27E-01 |
| <i>ARHGEF6</i>         | 1,06  | 2,53E-01 | 5,27E-01 |
| <i>CCND1</i>           | 1,11  | 2,53E-01 | 5,27E-01 |
| <i>CHRNA5</i>          | -1,08 | 2,53E-01 | 5,28E-01 |
| <i>CACNB3</i>          | -1,06 | 2,53E-01 | 5,28E-01 |
| <i>A_24_P59211</i>     | -1,04 | 2,53E-01 | 5,28E-01 |
| <i>THC2403706</i>      | -1,14 | 2,53E-01 | 5,28E-01 |
| <i>FAM13A10S</i>       | -1,06 | 2,53E-01 | 5,28E-01 |
| <i>CDK10</i>           | 1,05  | 2,53E-01 | 5,28E-01 |
| <i>A_32_P170814</i>    | 1,05  | 2,53E-01 | 5,28E-01 |
| <i>MXI1</i>            | 1,10  | 2,53E-01 | 5,28E-01 |
| <i>CR602569</i>        | -1,05 | 2,53E-01 | 5,28E-01 |
| <i>CR619805</i>        | 1,05  | 2,53E-01 | 5,28E-01 |
| <i>FLJ30851</i>        | 1,07  | 2,54E-01 | 5,28E-01 |
| <i>FBXO42</i>          | -1,05 | 2,54E-01 | 5,28E-01 |
| <i>MINA</i>            | 1,04  | 2,54E-01 | 5,28E-01 |
| <i>SFRS2IP</i>         | 1,05  | 2,54E-01 | 5,28E-01 |
| <i>DCP_20_5</i>        | 1,14  | 2,54E-01 | 5,28E-01 |
| <i>TNS3</i>            | -1,08 | 2,54E-01 | 5,29E-01 |

|                        |       |          |          |
|------------------------|-------|----------|----------|
| <i>UBE2I</i>           | -1,04 | 2,54E-01 | 5,29E-01 |
| <i>ZBTB22</i>          | 1,05  | 2,54E-01 | 5,29E-01 |
| <i>ANGPTL3</i>         | -1,04 | 2,54E-01 | 5,29E-01 |
| <i>BQ019626</i>        | 1,12  | 2,54E-01 | 5,29E-01 |
| <i>FTHL12</i>          | 1,06  | 2,54E-01 | 5,29E-01 |
| <i>GPR119</i>          | 1,06  | 2,54E-01 | 5,29E-01 |
| <i>ENST00000374274</i> | 1,03  | 2,54E-01 | 5,29E-01 |
| <i>ENST00000340301</i> | 1,04  | 2,54E-01 | 5,29E-01 |
| <i>AK026372</i>        | -1,14 | 2,54E-01 | 5,29E-01 |
| <i>A_24_P919931</i>    | -1,06 | 2,54E-01 | 5,29E-01 |
| <i>THC2443880</i>      | -1,03 | 2,54E-01 | 5,29E-01 |
| <i>A_24_P934434</i>    | 1,04  | 2,54E-01 | 5,29E-01 |
| <i>C14orf125</i>       | -1,06 | 2,54E-01 | 5,29E-01 |
| <i>TETRA</i>           | 1,04  | 2,54E-01 | 5,29E-01 |
| <i>BC069164</i>        | 1,05  | 2,54E-01 | 5,29E-01 |
| <i>CABP1</i>           | 1,09  | 2,54E-01 | 5,29E-01 |
| <i>ENST00000294485</i> | -1,12 | 2,54E-01 | 5,29E-01 |
| <i>LOC644656</i>       | -1,06 | 2,54E-01 | 5,29E-01 |
| <i>RP11-93B14.6</i>    | 1,05  | 2,54E-01 | 5,29E-01 |
| <i>FBXL8</i>           | 1,05  | 2,54E-01 | 5,29E-01 |
| <i>THC2284657</i>      | 1,06  | 2,54E-01 | 5,29E-01 |
| <i>TPTE2</i>           | -1,06 | 2,54E-01 | 5,29E-01 |
| <i>IFNA14</i>          | 1,05  | 2,55E-01 | 5,29E-01 |
| <i>QDPR</i>            | -1,05 | 2,55E-01 | 5,29E-01 |
| <i>ENST00000367808</i> | 1,04  | 2,55E-01 | 5,29E-01 |
| <i>ENST00000235180</i> | 1,05  | 2,55E-01 | 5,29E-01 |
| <i>TACSTD2</i>         | 1,32  | 2,55E-01 | 5,29E-01 |
| <i>A_24_P917810</i>    | -1,03 | 2,55E-01 | 5,30E-01 |
| <i>CD163</i>           | -1,12 | 2,55E-01 | 5,30E-01 |
| <i>FLJ30313</i>        | -1,10 | 2,55E-01 | 5,30E-01 |
| <i>FYB</i>             | -1,08 | 2,55E-01 | 5,30E-01 |
| <i>ABLIM3</i>          | -1,08 | 2,55E-01 | 5,30E-01 |
| <i>C18orf45</i>        | -1,05 | 2,55E-01 | 5,30E-01 |
| <i>PCDHB8</i>          | -1,05 | 2,55E-01 | 5,30E-01 |
| <i>A_24_P341546</i>    | -1,05 | 2,55E-01 | 5,30E-01 |
| <i>BQ772694</i>        | -1,04 | 2,55E-01 | 5,30E-01 |
| <i>AA065042</i>        | -1,04 | 2,55E-01 | 5,30E-01 |
| <i>AK127412</i>        | 1,04  | 2,55E-01 | 5,30E-01 |
| <i>BC026316</i>        | 1,04  | 2,55E-01 | 5,30E-01 |
| <i>ENST00000332842</i> | 1,05  | 2,55E-01 | 5,30E-01 |
| <i>AY358179</i>        | 1,05  | 2,55E-01 | 5,30E-01 |
| <i>N51961</i>          | 1,06  | 2,55E-01 | 5,30E-01 |
| <i>GPR124</i>          | 1,06  | 2,55E-01 | 5,30E-01 |
| <i>A_23_P40290</i>     | 1,07  | 2,55E-01 | 5,30E-01 |

|                        |       |          |          |
|------------------------|-------|----------|----------|
| <i>CDK2AP2</i>         | 1,07  | 2,55E-01 | 5,30E-01 |
| <i>FAM44B</i>          | -1,04 | 2,55E-01 | 5,30E-01 |
| <i>MS4A6A</i>          | -1,10 | 2,55E-01 | 5,30E-01 |
| <i>BC020539</i>        | -1,05 | 2,55E-01 | 5,30E-01 |
| <i>THC2409067</i>      | -1,04 | 2,55E-01 | 5,30E-01 |
| <i>SLC24A2</i>         | -1,04 | 2,55E-01 | 5,30E-01 |
| <i>ENST00000340621</i> | 1,04  | 2,55E-01 | 5,30E-01 |
| <i>BU566406</i>        | 1,05  | 2,55E-01 | 5,30E-01 |
| <i>KNG1</i>            | 1,03  | 2,55E-01 | 5,30E-01 |
| <i>THC2375179</i>      | -1,04 | 2,55E-01 | 5,30E-01 |
| <i>AK097703</i>        | 1,04  | 2,55E-01 | 5,30E-01 |
| <i>RNF149</i>          | 1,07  | 2,55E-01 | 5,30E-01 |
| <i>C8orf48</i>         | -1,08 | 2,56E-01 | 5,31E-01 |
| <i>BC066989</i>        | 1,04  | 2,56E-01 | 5,31E-01 |
| <i>ACSL5</i>           | -1,04 | 2,56E-01 | 5,31E-01 |
| <i>THC2403119</i>      | 1,04  | 2,56E-01 | 5,31E-01 |
| <i>CHTF18</i>          | -1,06 | 2,56E-01 | 5,31E-01 |
| <i>C5orf15</i>         | -1,06 | 2,56E-01 | 5,31E-01 |
| <i>BF433735</i>        | 1,05  | 2,56E-01 | 5,31E-01 |
| <i>SNX26</i>           | 1,06  | 2,56E-01 | 5,31E-01 |
| <i>A_24_P144134</i>    | -1,10 | 2,56E-01 | 5,31E-01 |
| <i>ENST00000332649</i> | -1,07 | 2,56E-01 | 5,31E-01 |
| <i>THC2381387</i>      | -1,05 | 2,56E-01 | 5,31E-01 |
| <i>HIRIP5</i>          | 1,04  | 2,56E-01 | 5,31E-01 |
| <i>C3orf50</i>         | 1,11  | 2,56E-01 | 5,31E-01 |
| <i>ENST00000309178</i> | 1,11  | 2,56E-01 | 5,31E-01 |
| <i>DCP_20_7</i>        | 1,15  | 2,56E-01 | 5,31E-01 |
| <i>HBS1L</i>           | 1,04  | 2,56E-01 | 5,31E-01 |
| <i>A_24_P930799</i>    | -1,05 | 2,56E-01 | 5,31E-01 |
| <i>TXNDC5</i>          | -1,11 | 2,56E-01 | 5,31E-01 |
| <i>FABP6</i>           | -1,09 | 2,56E-01 | 5,31E-01 |
| <i>GLO1</i>            | -1,06 | 2,56E-01 | 5,31E-01 |
| <i>SOHLH1</i>          | 1,04  | 2,56E-01 | 5,31E-01 |
| <i>THC2400004</i>      | 1,05  | 2,56E-01 | 5,31E-01 |
| <i>BM678897</i>        | -1,04 | 2,56E-01 | 5,31E-01 |
| <i>PITX3</i>           | 1,04  | 2,56E-01 | 5,31E-01 |
| <i>IL1RAPL1</i>        | 1,05  | 2,56E-01 | 5,31E-01 |
| <i>ENST00000374643</i> | 1,03  | 2,56E-01 | 5,31E-01 |
| <i>NSUN6</i>           | -1,05 | 2,56E-01 | 5,31E-01 |
| <i>AF088054</i>        | 1,04  | 2,56E-01 | 5,31E-01 |
| <i>AK022848</i>        | -1,04 | 2,56E-01 | 5,31E-01 |
| <i>ENST00000381325</i> | -1,05 | 2,56E-01 | 5,31E-01 |
| <i>DKFZP564B147</i>    | -1,05 | 2,56E-01 | 5,31E-01 |
| <i>U2AF2</i>           | -1,04 | 2,56E-01 | 5,31E-01 |

|                        |       |          |          |
|------------------------|-------|----------|----------|
| <i>ATP8B3</i>          | 1,07  | 2,57E-01 | 5,31E-01 |
| <i>ENST00000312275</i> | -1,12 | 2,57E-01 | 5,31E-01 |
| <i>BC044845</i>        | -1,05 | 2,57E-01 | 5,32E-01 |
| <i>ENST00000366784</i> | 1,06  | 2,57E-01 | 5,32E-01 |
| <i>C1orf90</i>         | -1,06 | 2,57E-01 | 5,32E-01 |
| <i>A_24_P691775</i>    | -1,05 | 2,57E-01 | 5,32E-01 |
| <i>KIAA1856</i>        | 1,05  | 2,57E-01 | 5,32E-01 |
| <i>XTP3TPA</i>         | -1,05 | 2,57E-01 | 5,32E-01 |
| <i>PSMC5</i>           | 1,04  | 2,57E-01 | 5,32E-01 |
| <i>DKFZp762E1312</i>   | -1,05 | 2,57E-01 | 5,32E-01 |
| <i>JTB</i>             | -1,06 | 2,57E-01 | 5,32E-01 |
| <i>DNHD3</i>           | -1,05 | 2,57E-01 | 5,32E-01 |
| <i>A_32_P153410</i>    | -1,05 | 2,57E-01 | 5,32E-01 |
| <i>BX110500</i>        | -1,05 | 2,57E-01 | 5,32E-01 |
| <i>TFDP3</i>           | 1,04  | 2,57E-01 | 5,32E-01 |
| <i>A_24_P325533</i>    | 1,05  | 2,57E-01 | 5,32E-01 |
| <i>BTN1A1</i>          | 1,05  | 2,57E-01 | 5,32E-01 |
| <i>SMTNL2</i>          | 1,11  | 2,57E-01 | 5,32E-01 |
| <i>BM973223</i>        | 1,04  | 2,57E-01 | 5,32E-01 |
| <i>ART1</i>            | 1,05  | 2,57E-01 | 5,32E-01 |
| <i>MAP1A</i>           | 1,06  | 2,57E-01 | 5,32E-01 |
| <i>CSPP1</i>           | 1,05  | 2,57E-01 | 5,32E-01 |
| <i>MGC39821</i>        | -1,05 | 2,57E-01 | 5,32E-01 |
| <i>KRT12</i>           | -1,04 | 2,57E-01 | 5,32E-01 |
| <i>SNX12</i>           | 1,03  | 2,57E-01 | 5,32E-01 |
| <i>RPS10</i>           | -1,04 | 2,57E-01 | 5,32E-01 |
| <i>ENST00000381857</i> | 1,04  | 2,57E-01 | 5,32E-01 |
| <i>TBC1D22B</i>        | 1,04  | 2,57E-01 | 5,32E-01 |
| <i>GPR123</i>          | 1,05  | 2,57E-01 | 5,32E-01 |
| <i>SLC25A27</i>        | -1,08 | 2,57E-01 | 5,32E-01 |
| <i>CHGB</i>            | -1,18 | 2,58E-01 | 5,32E-01 |
| <i>TNFRSF1B</i>        | -1,06 | 2,58E-01 | 5,32E-01 |
| <i>AI090167</i>        | -1,06 | 2,58E-01 | 5,32E-01 |
| <i>LRRC6</i>           | -1,05 | 2,58E-01 | 5,32E-01 |
| <i>BC034326</i>        | 1,04  | 2,58E-01 | 5,32E-01 |
| <i>POLR1D</i>          | 1,06  | 2,58E-01 | 5,32E-01 |
| <i>THC2403745</i>      | -1,05 | 2,58E-01 | 5,32E-01 |
| <i>USH1C</i>           | -1,04 | 2,58E-01 | 5,32E-01 |
| <i>UBXD6</i>           | -1,06 | 2,58E-01 | 5,33E-01 |
| <i>THC2281706</i>      | -1,18 | 2,58E-01 | 5,33E-01 |
| <i>AK093202</i>        | -1,08 | 2,58E-01 | 5,33E-01 |
| <i>FBP2</i>            | -1,05 | 2,58E-01 | 5,33E-01 |
| <i>LRRC18</i>          | 1,03  | 2,58E-01 | 5,33E-01 |
| <i>EEFSEC</i>          | 1,04  | 2,58E-01 | 5,33E-01 |

|              |       |          |          |
|--------------|-------|----------|----------|
| AA768015     | 1,07  | 2,58E-01 | 5,33E-01 |
| A_24_P745960 | 1,08  | 2,58E-01 | 5,33E-01 |
| DUOX1        | 1,10  | 2,58E-01 | 5,33E-01 |
| C4orf12      | -1,08 | 2,58E-01 | 5,33E-01 |
| SLC15A3      | 1,05  | 2,58E-01 | 5,33E-01 |
| THC2342129   | 1,05  | 2,58E-01 | 5,33E-01 |
| MGC34646     | -1,03 | 2,58E-01 | 5,33E-01 |
| A_24_P587882 | 1,05  | 2,58E-01 | 5,33E-01 |
| TFF3         | -1,17 | 2,58E-01 | 5,33E-01 |
| RFXANK       | -1,03 | 2,58E-01 | 5,33E-01 |
| LOC201895    | 1,06  | 2,58E-01 | 5,33E-01 |
| PTGER2       | -1,12 | 2,58E-01 | 5,33E-01 |
| CD248        | -1,08 | 2,58E-01 | 5,33E-01 |
| CES1         | 1,15  | 2,58E-01 | 5,33E-01 |
| ZFP30        | -1,04 | 2,58E-01 | 5,33E-01 |
| ZNF649       | -1,05 | 2,59E-01 | 5,33E-01 |
| BMP3         | -1,05 | 2,59E-01 | 5,33E-01 |
| CSNK2B       | -1,03 | 2,59E-01 | 5,33E-01 |
| KIAA0226     | 1,06  | 2,59E-01 | 5,33E-01 |
| CA437634     | 1,12  | 2,59E-01 | 5,33E-01 |
| TATDN2       | -1,04 | 2,59E-01 | 5,33E-01 |
| SLA2         | -1,04 | 2,59E-01 | 5,34E-01 |
| DCP_1_4      | 1,13  | 2,59E-01 | 5,34E-01 |
| GORASP2      | -1,08 | 2,59E-01 | 5,34E-01 |
| COL20A1      | -1,13 | 2,59E-01 | 5,34E-01 |
| GGA1         | -1,07 | 2,59E-01 | 5,34E-01 |
| AA524504     | -1,04 | 2,59E-01 | 5,34E-01 |
| A_24_P913190 | 1,05  | 2,59E-01 | 5,34E-01 |
| AJ295982     | 1,05  | 2,59E-01 | 5,34E-01 |
| A_24_P900721 | 1,07  | 2,59E-01 | 5,34E-01 |
| A_24_P850336 | 1,14  | 2,59E-01 | 5,34E-01 |
| CCDC116      | -1,04 | 2,59E-01 | 5,34E-01 |
| BC031973     | 1,04  | 2,59E-01 | 5,34E-01 |
| PAICS        | -1,05 | 2,59E-01 | 5,34E-01 |
| SLC26A7      | -1,04 | 2,59E-01 | 5,34E-01 |
| A_24_P267686 | -1,06 | 2,59E-01 | 5,34E-01 |
| C14orf172    | -1,05 | 2,59E-01 | 5,34E-01 |
| HSPBP1       | 1,04  | 2,59E-01 | 5,34E-01 |
| AF086335     | 1,05  | 2,59E-01 | 5,34E-01 |
| AL561405     | 1,06  | 2,59E-01 | 5,34E-01 |
| BE243347     | -1,03 | 2,59E-01 | 5,34E-01 |
| C14orf43     | 1,03  | 2,59E-01 | 5,34E-01 |
| C20orf149    | -1,06 | 2,60E-01 | 5,34E-01 |
| TDG          | 1,04  | 2,60E-01 | 5,34E-01 |



|                        |       |          |          |
|------------------------|-------|----------|----------|
| <i>A_24_P923514</i>    | 1,04  | 2,60E-01 | 5,34E-01 |
| <i>A_24_P910504</i>    | 1,06  | 2,60E-01 | 5,35E-01 |
| <i>AK126298</i>        | 1,12  | 2,60E-01 | 5,35E-01 |
| <i>THC2460283</i>      | 1,03  | 2,60E-01 | 5,35E-01 |
| <i>A_23_P377680</i>    | -1,12 | 2,60E-01 | 5,35E-01 |
| <i>AI933337</i>        | -1,05 | 2,60E-01 | 5,35E-01 |
| <i>C16orf34</i>        | -1,04 | 2,60E-01 | 5,35E-01 |
| <i>C1orf182</i>        | 1,03  | 2,60E-01 | 5,35E-01 |
| <i>ENDOG</i>           | 1,04  | 2,60E-01 | 5,35E-01 |
| <i>CA419971</i>        | -1,07 | 2,60E-01 | 5,35E-01 |
| <i>GTPBP8</i>          | 1,04  | 2,60E-01 | 5,35E-01 |
| <i>ZNF585B</i>         | -1,06 | 2,60E-01 | 5,35E-01 |
| <i>PSMD6</i>           | 1,03  | 2,60E-01 | 5,35E-01 |
| <i>NETO1</i>           | -1,06 | 2,60E-01 | 5,35E-01 |
| <i>CD511705</i>        | 1,05  | 2,60E-01 | 5,35E-01 |
| <i>UROD</i>            | -1,04 | 2,60E-01 | 5,35E-01 |
| <i>NT5DC1</i>          | 1,05  | 2,60E-01 | 5,35E-01 |
| <i>FASTKD2</i>         | 1,03  | 2,60E-01 | 5,35E-01 |
| <i>PAQR8</i>           | 1,06  | 2,60E-01 | 5,35E-01 |
| <i>EXOSC1</i>          | -1,04 | 2,60E-01 | 5,35E-01 |
| <i>PRX</i>             | -1,07 | 2,60E-01 | 5,36E-01 |
| <i>ARAF</i>            | 1,05  | 2,60E-01 | 5,36E-01 |
| <i>CCL18</i>           | 1,20  | 2,60E-01 | 5,36E-01 |
| <i>AL522024</i>        | -1,09 | 2,61E-01 | 5,36E-01 |
| <i>AK096031</i>        | -1,04 | 2,61E-01 | 5,36E-01 |
| <i>MRAS</i>            | 1,07  | 2,61E-01 | 5,36E-01 |
| <i>A_24_P868992</i>    | 1,04  | 2,61E-01 | 5,36E-01 |
| <i>LOC642491</i>       | -1,04 | 2,61E-01 | 5,36E-01 |
| <i>ENST00000372142</i> | 1,05  | 2,61E-01 | 5,36E-01 |
| <i>A_32_P199506</i>    | 1,06  | 2,61E-01 | 5,36E-01 |
| <i>THC2280867</i>      | 1,06  | 2,61E-01 | 5,36E-01 |
| <i>CR622072</i>        | -1,13 | 2,61E-01 | 5,36E-01 |
| <i>FERD3L</i>          | -1,05 | 2,61E-01 | 5,36E-01 |
| <i>CYFIP1</i>          | -1,04 | 2,61E-01 | 5,36E-01 |
| <i>CENPO</i>           | -1,04 | 2,61E-01 | 5,36E-01 |
| <i>A_23_P84974</i>     | -1,04 | 2,61E-01 | 5,36E-01 |
| <i>BX107298</i>        | -1,08 | 2,61E-01 | 5,36E-01 |
| <i>BU540282</i>        | -1,45 | 2,61E-01 | 5,36E-01 |
| <i>A_24_P916407</i>    | -1,06 | 2,61E-01 | 5,36E-01 |
| <i>A_24_P392351</i>    | -1,05 | 2,61E-01 | 5,36E-01 |
| <i>LSM7</i>            | -1,05 | 2,61E-01 | 5,36E-01 |
| <i>CFHR5</i>           | 1,04  | 2,61E-01 | 5,36E-01 |
| <i>ENST00000378644</i> | 1,06  | 2,61E-01 | 5,36E-01 |
| <i>AW411241</i>        | 1,09  | 2,61E-01 | 5,36E-01 |

|                 |       |          |          |
|-----------------|-------|----------|----------|
| A_23_P21393     | -1,09 | 2,61E-01 | 5,36E-01 |
| A_24_P928671    | -1,04 | 2,61E-01 | 5,36E-01 |
| NFYC            | -1,03 | 2,61E-01 | 5,36E-01 |
| SLC6A8          | 1,08  | 2,61E-01 | 5,36E-01 |
| GABBR1          | -1,06 | 2,61E-01 | 5,36E-01 |
| UST             | -1,10 | 2,61E-01 | 5,36E-01 |
| ENST00000294663 | 1,06  | 2,61E-01 | 5,36E-01 |
| AK096256        | -1,06 | 2,62E-01 | 5,37E-01 |
| BE176693        | 1,05  | 2,62E-01 | 5,37E-01 |
| ORMDL2          | 1,06  | 2,62E-01 | 5,37E-01 |
| ENST00000374472 | -1,05 | 2,62E-01 | 5,37E-01 |
| THC2365158      | -1,04 | 2,62E-01 | 5,37E-01 |
| DCHS2           | -1,03 | 2,62E-01 | 5,37E-01 |
| ATP6V0B         | 1,04  | 2,62E-01 | 5,37E-01 |
| EFHB            | 1,06  | 2,62E-01 | 5,37E-01 |
| FLJ30430        | 1,04  | 2,62E-01 | 5,37E-01 |
| ATAD3C          | 1,11  | 2,62E-01 | 5,37E-01 |
| PEX10           | 1,03  | 2,62E-01 | 5,37E-01 |
| PAX9            | 1,06  | 2,62E-01 | 5,37E-01 |
| DCP_1_0         | 1,12  | 2,62E-01 | 5,37E-01 |
| SCN7A           | 1,19  | 2,62E-01 | 5,37E-01 |
| PON2            | 1,05  | 2,62E-01 | 5,37E-01 |
| HSD17B4         | -1,04 | 2,62E-01 | 5,37E-01 |
| TMEM85          | -1,04 | 2,62E-01 | 5,37E-01 |
| MYO1A           | 1,04  | 2,62E-01 | 5,37E-01 |
| THC2413052      | -1,04 | 2,62E-01 | 5,38E-01 |
| CAV3            | 1,12  | 2,62E-01 | 5,38E-01 |
| LAMB4           | 1,04  | 2,62E-01 | 5,38E-01 |
| ENST00000328060 | -1,06 | 2,62E-01 | 5,38E-01 |
| CCDC84          | -1,05 | 2,62E-01 | 5,38E-01 |
| A_24_P164815    | -1,05 | 2,63E-01 | 5,38E-01 |
| SMC6            | -1,03 | 2,62E-01 | 5,38E-01 |
| ENST00000331596 | 1,04  | 2,63E-01 | 5,38E-01 |
| GRIPAP1         | 1,04  | 2,63E-01 | 5,38E-01 |
| A_23_P106814    | 1,05  | 2,62E-01 | 5,38E-01 |
| THC2339926      | -1,06 | 2,63E-01 | 5,38E-01 |
| KIAA0391        | 1,05  | 2,63E-01 | 5,38E-01 |
| ANXA5           | 1,05  | 2,63E-01 | 5,38E-01 |
| A_23_P169949    | 1,05  | 2,63E-01 | 5,38E-01 |
| TTK             | -1,05 | 2,63E-01 | 5,38E-01 |
| ETG10_236652    | 1,02  | 2,63E-01 | 5,38E-01 |
| AU146963        | -1,04 | 2,63E-01 | 5,38E-01 |
| AA714537        | 1,05  | 2,63E-01 | 5,38E-01 |
| TAS2R1          | -1,05 | 2,63E-01 | 5,38E-01 |

|                        |       |          |          |
|------------------------|-------|----------|----------|
| <i>WDR65</i>           | -1,03 | 2,63E-01 | 5,38E-01 |
| <i>AF086018</i>        | -1,04 | 2,63E-01 | 5,38E-01 |
| <i>YIPF1</i>           | -1,03 | 2,63E-01 | 5,38E-01 |
| <i>MAP2K2</i>          | 1,04  | 2,63E-01 | 5,38E-01 |
| <i>THC2392598</i>      | -1,05 | 2,63E-01 | 5,38E-01 |
| <i>BM702245</i>        | -1,04 | 2,63E-01 | 5,38E-01 |
| <i>SEC14L3</i>         | -1,04 | 2,63E-01 | 5,38E-01 |
| <i>ZSWIM2</i>          | -1,04 | 2,63E-01 | 5,38E-01 |
| <i>PPM1A</i>           | 1,05  | 2,63E-01 | 5,38E-01 |
| <i>MAGEA11</i>         | 1,04  | 2,63E-01 | 5,38E-01 |
| <i>VAV2</i>            | 1,04  | 2,63E-01 | 5,39E-01 |
| <i>LOC284861</i>       | 1,08  | 2,63E-01 | 5,39E-01 |
| <i>BF326811</i>        | 1,04  | 2,63E-01 | 5,39E-01 |
| <i>ENST00000267918</i> | -1,05 | 2,63E-01 | 5,39E-01 |
| <i>MOP-1</i>           | 1,05  | 2,63E-01 | 5,39E-01 |
| <i>C21orf58</i>        | 1,07  | 2,63E-01 | 5,39E-01 |
| <i>BC035906</i>        | 1,05  | 2,63E-01 | 5,39E-01 |
| <i>RELN</i>            | 1,11  | 2,63E-01 | 5,39E-01 |
| <i>RHOA</i>            | 1,05  | 2,64E-01 | 5,39E-01 |
| <i>AK128814</i>        | -1,08 | 2,64E-01 | 5,39E-01 |
| <i>AK093229</i>        | -1,06 | 2,64E-01 | 5,39E-01 |
| <i>ENST00000355788</i> | 1,05  | 2,64E-01 | 5,39E-01 |
| <i>ZNF444</i>          | -1,05 | 2,64E-01 | 5,39E-01 |
| <i>TP73</i>            | 1,02  | 2,64E-01 | 5,39E-01 |
| <i>RTCD1</i>           | -1,05 | 2,64E-01 | 5,39E-01 |
| <i>A_32_P113954</i>    | 1,04  | 2,64E-01 | 5,39E-01 |
| <i>COL18A1</i>         | 1,11  | 2,64E-01 | 5,39E-01 |
| <i>PIM3</i>            | 1,09  | 2,64E-01 | 5,39E-01 |
| <i>ST7L</i>            | -1,04 | 2,64E-01 | 5,39E-01 |
| <i>A_24_P307466</i>    | -1,04 | 2,64E-01 | 5,39E-01 |
| <i>BM677531</i>        | 1,06  | 2,64E-01 | 5,39E-01 |
| <i>AF118062</i>        | 1,03  | 2,64E-01 | 5,39E-01 |
| <i>AK123066</i>        | -1,05 | 2,64E-01 | 5,40E-01 |
| <i>AK123107</i>        | -1,04 | 2,64E-01 | 5,40E-01 |
| <i>KCNAB2</i>          | 1,04  | 2,64E-01 | 5,40E-01 |
| <i>THC2273386</i>      | -1,04 | 2,64E-01 | 5,40E-01 |
| <i>GNPTG</i>           | -1,04 | 2,64E-01 | 5,40E-01 |
| <i>A_32_P72887</i>     | -1,04 | 2,64E-01 | 5,40E-01 |
| <i>DGKQ</i>            | 1,04  | 2,64E-01 | 5,40E-01 |
| <i>RBPM52</i>          | -1,20 | 2,65E-01 | 5,40E-01 |
| <i>ADAM8</i>           | -1,11 | 2,65E-01 | 5,40E-01 |
| <i>THC2409409</i>      | -1,10 | 2,64E-01 | 5,40E-01 |
| <i>C21orf30</i>        | -1,06 | 2,65E-01 | 5,40E-01 |
| <i>IL11RA</i>          | -1,06 | 2,65E-01 | 5,40E-01 |

|                        |       |          |          |
|------------------------|-------|----------|----------|
| <i>ENST00000360182</i> | -1,05 | 2,65E-01 | 5,40E-01 |
| <i>AW858928</i>        | -1,04 | 2,65E-01 | 5,40E-01 |
| <i>CDY2A</i>           | -1,04 | 2,65E-01 | 5,40E-01 |
| <i>IL5</i>             | -1,04 | 2,65E-01 | 5,40E-01 |
| <i>C21orf42</i>        | 1,03  | 2,65E-01 | 5,40E-01 |
| <i>CNGB3</i>           | 1,05  | 2,65E-01 | 5,40E-01 |
| <i>A_24_P76008</i>     | 1,06  | 2,65E-01 | 5,40E-01 |
| <i>A_32_P167577</i>    | 1,06  | 2,65E-01 | 5,40E-01 |
| <i>THC2307535</i>      | 1,07  | 2,65E-01 | 5,40E-01 |
| <i>C21orf56</i>        | 1,09  | 2,65E-01 | 5,40E-01 |
| <i>PROX1</i>           | 1,11  | 2,65E-01 | 5,40E-01 |
| <i>LOC285382</i>       | 1,12  | 2,65E-01 | 5,40E-01 |
| <i>ENST00000377047</i> | 1,14  | 2,65E-01 | 5,40E-01 |
| <i>SCG5</i>            | 1,17  | 2,65E-01 | 5,40E-01 |
| <i>OR2A9P</i>          | -1,13 | 2,65E-01 | 5,40E-01 |
| <i>SCGB2A2</i>         | -1,05 | 2,65E-01 | 5,40E-01 |
| <i>AF126109</i>        | -1,05 | 2,65E-01 | 5,40E-01 |
| <i>FLJ14477</i>        | -1,05 | 2,65E-01 | 5,40E-01 |
| <i>XDH</i>             | -1,03 | 2,65E-01 | 5,40E-01 |
| <i>RPS7</i>            | -1,03 | 2,65E-01 | 5,40E-01 |
| <i>BCL2L14</i>         | 1,04  | 2,65E-01 | 5,40E-01 |
| <i>A_24_P915894</i>    | 1,04  | 2,65E-01 | 5,40E-01 |
| <i>BC031344</i>        | 1,05  | 2,65E-01 | 5,40E-01 |
| <i>PRO2852</i>         | 1,07  | 2,65E-01 | 5,40E-01 |
| <i>AF035020</i>        | -1,05 | 2,65E-01 | 5,40E-01 |
| <i>THC2408069</i>      | -1,04 | 2,65E-01 | 5,40E-01 |
| <i>THC2439349</i>      | -1,05 | 2,65E-01 | 5,40E-01 |
| <i>AL137482</i>        | 1,04  | 2,65E-01 | 5,40E-01 |
| <i>ENST00000238256</i> | -1,04 | 2,65E-01 | 5,40E-01 |
| <i>C10orf114</i>       | -1,10 | 2,65E-01 | 5,40E-01 |
| <i>TBRG4</i>           | -1,05 | 2,65E-01 | 5,40E-01 |
| <i>LOC283624</i>       | 1,05  | 2,65E-01 | 5,40E-01 |
| <i>CETP</i>            | 1,06  | 2,65E-01 | 5,40E-01 |
| <i>AF044579</i>        | -1,04 | 2,65E-01 | 5,40E-01 |
| <i>CR620293</i>        | -1,09 | 2,65E-01 | 5,40E-01 |
| <i>AF086468</i>        | 1,04  | 2,65E-01 | 5,40E-01 |
| <i>TMEM16J</i>         | 1,05  | 2,65E-01 | 5,40E-01 |
| <i>THC2407555</i>      | -1,07 | 2,65E-01 | 5,41E-01 |
| <i>IQCH</i>            | -1,03 | 2,65E-01 | 5,41E-01 |
| <i>TMEM100</i>         | -1,11 | 2,66E-01 | 5,41E-01 |
| <i>U44029</i>          | 1,04  | 2,66E-01 | 5,41E-01 |
| <i>LOC91137</i>        | 1,04  | 2,66E-01 | 5,41E-01 |
| <i>SLC22A14</i>        | 1,04  | 2,66E-01 | 5,41E-01 |
| <i>C1orf66</i>         | -1,05 | 2,66E-01 | 5,41E-01 |

|                   |       |          |          |
|-------------------|-------|----------|----------|
| <i>HD</i>         | 1,03  | 2,66E-01 | 5,41E-01 |
| <i>THC2440970</i> | -1,04 | 2,66E-01 | 5,41E-01 |
| <i>PDGFD</i>      | -1,21 | 2,66E-01 | 5,41E-01 |
| <i>PIWIL2</i>     | -1,07 | 2,66E-01 | 5,41E-01 |
| <i>PLEKHK1</i>    | -1,04 | 2,66E-01 | 5,41E-01 |
| <i>CLCA3</i>      | -1,08 | 2,66E-01 | 5,41E-01 |
| <i>AMID</i>       | 1,06  | 2,66E-01 | 5,41E-01 |
| <i>THC2364841</i> | -1,09 | 2,66E-01 | 5,41E-01 |
| <i>NONO</i>       | -1,03 | 2,66E-01 | 5,41E-01 |
| <i>MPPED1</i>     | 1,05  | 2,66E-01 | 5,41E-01 |
| <i>AI022288</i>   | 1,06  | 2,66E-01 | 5,41E-01 |
| <i>THC2376823</i> | -1,05 | 2,66E-01 | 5,41E-01 |
| <i>HSPC072</i>    | 1,04  | 2,66E-01 | 5,41E-01 |
| <i>AK022892</i>   | -1,05 | 2,66E-01 | 5,41E-01 |
| <i>MAP3K13</i>    | -1,03 | 2,66E-01 | 5,41E-01 |
| <i>PRNPIP</i>     | -1,03 | 2,66E-01 | 5,41E-01 |
| <i>AK094929</i>   | 1,25  | 2,66E-01 | 5,41E-01 |
| <i>CIB4</i>       | -1,07 | 2,66E-01 | 5,41E-01 |
| <i>RGS14</i>      | 1,05  | 2,66E-01 | 5,41E-01 |
| <i>NT5C1B</i>     | -1,03 | 2,66E-01 | 5,42E-01 |
| <i>BC030112</i>   | 1,06  | 2,66E-01 | 5,42E-01 |
| <i>BC052613</i>   | -1,04 | 2,67E-01 | 5,42E-01 |
| <i>LOC202051</i>  | 1,04  | 2,67E-01 | 5,42E-01 |
| <i>EZH1</i>       | -1,07 | 2,67E-01 | 5,42E-01 |
| <i>RTN4IP1</i>    | 1,04  | 2,67E-01 | 5,42E-01 |
| <i>GCHFR</i>      | 1,08  | 2,67E-01 | 5,42E-01 |
| <i>Tenr</i>       | 1,03  | 2,67E-01 | 5,42E-01 |
| <i>C7orf28A</i>   | 1,03  | 2,67E-01 | 5,42E-01 |
| <i>FLJ20035</i>   | -1,06 | 2,67E-01 | 5,42E-01 |
| <i>AK092577</i>   | -1,09 | 2,67E-01 | 5,42E-01 |
| <i>COLEC10</i>    | -1,04 | 2,67E-01 | 5,42E-01 |
| <i>THC2380681</i> | 1,04  | 2,67E-01 | 5,42E-01 |
| <i>NRCAM</i>      | -1,08 | 2,67E-01 | 5,42E-01 |
| <i>C9orf26</i>    | -1,08 | 2,67E-01 | 5,42E-01 |
| <i>THC2308340</i> | -1,06 | 2,67E-01 | 5,42E-01 |
| <i>LOC283514</i>  | 1,04  | 2,67E-01 | 5,42E-01 |
| <i>C1orf19</i>    | -1,06 | 2,67E-01 | 5,43E-01 |
| <i>THC2445830</i> | -1,05 | 2,67E-01 | 5,43E-01 |
| <i>STEAP3</i>     | 1,06  | 2,67E-01 | 5,43E-01 |
| <i>AF212044</i>   | 1,08  | 2,67E-01 | 5,43E-01 |
| <i>KIAA0143</i>   | -1,06 | 2,67E-01 | 5,43E-01 |
| <i>OTEX</i>       | -1,08 | 2,68E-01 | 5,43E-01 |
| <i>MYL5</i>       | 1,07  | 2,68E-01 | 5,43E-01 |
| <i>SOSTDC1</i>    | 1,26  | 2,68E-01 | 5,43E-01 |

|                        |       |          |          |
|------------------------|-------|----------|----------|
| <i>MDM2</i>            | 1,03  | 2,68E-01 | 5,43E-01 |
| <i>A_24_P50281</i>     | 1,09  | 2,68E-01 | 5,43E-01 |
| <i>THC2390661</i>      | -1,04 | 2,68E-01 | 5,43E-01 |
| <i>GPR156</i>          | 1,06  | 2,68E-01 | 5,43E-01 |
| <i>THC2314348</i>      | -1,07 | 2,68E-01 | 5,43E-01 |
| <i>AF028840</i>        | -1,04 | 2,68E-01 | 5,43E-01 |
| <i>RAP80</i>           | -1,03 | 2,68E-01 | 5,43E-01 |
| <i>ACTL6B</i>          | 1,04  | 2,68E-01 | 5,43E-01 |
| <i>ENST00000325814</i> | 1,06  | 2,68E-01 | 5,44E-01 |
| <i>GALNT5</i>          | -1,12 | 2,68E-01 | 5,44E-01 |
| <i>THC2347232</i>      | -1,06 | 2,68E-01 | 5,44E-01 |
| <i>A_32_P143793</i>    | 1,05  | 2,68E-01 | 5,44E-01 |
| <i>A_24_P471121</i>    | 1,09  | 2,68E-01 | 5,44E-01 |
| <i>LHX1</i>            | 1,05  | 2,68E-01 | 5,44E-01 |
| <i>ASAH1</i>           | -1,07 | 2,68E-01 | 5,44E-01 |
| <i>A_23_P369758</i>    | -1,04 | 2,68E-01 | 5,44E-01 |
| <i>CR610404</i>        | -1,04 | 2,68E-01 | 5,44E-01 |
| <i>JUN</i>             | 1,15  | 2,68E-01 | 5,44E-01 |
| <i>CASP1</i>           | 1,09  | 2,68E-01 | 5,44E-01 |
| <i>A_24_P930582</i>    | 1,05  | 2,68E-01 | 5,44E-01 |
| <i>ZNF598</i>          | -1,04 | 2,68E-01 | 5,44E-01 |
| <i>TMEM75</i>          | 1,05  | 2,68E-01 | 5,44E-01 |
| <i>SPOCK2</i>          | -1,06 | 2,69E-01 | 5,44E-01 |
| <i>HBBP1</i>           | 1,04  | 2,69E-01 | 5,44E-01 |
| <i>THC2340878</i>      | -1,05 | 2,69E-01 | 5,44E-01 |
| <i>THC2371272</i>      | -1,07 | 2,69E-01 | 5,45E-01 |
| <i>NSBP1</i>           | 1,04  | 2,69E-01 | 5,45E-01 |
| <i>RP11-130N24.1</i>   | -1,07 | 2,69E-01 | 5,45E-01 |
| <i>A_32_P83520</i>     | -1,06 | 2,69E-01 | 5,45E-01 |
| <i>ENST00000211092</i> | 1,05  | 2,69E-01 | 5,45E-01 |
| <i>MLF1IP</i>          | -1,10 | 2,69E-01 | 5,45E-01 |
| <i>THC2277728</i>      | -1,06 | 2,69E-01 | 5,45E-01 |
| <i>ATP5O</i>           | 1,03  | 2,69E-01 | 5,45E-01 |
| <i>RPP30</i>           | 1,04  | 2,69E-01 | 5,45E-01 |
| <i>NME3</i>            | -1,04 | 2,69E-01 | 5,45E-01 |
| <i>AIM1</i>            | -1,08 | 2,69E-01 | 5,45E-01 |
| <i>RIOK1</i>           | 1,04  | 2,69E-01 | 5,45E-01 |
| <i>CR601196</i>        | -1,13 | 2,69E-01 | 5,45E-01 |
| <i>CR627362</i>        | -1,08 | 2,69E-01 | 5,45E-01 |
| <i>LMO6</i>            | 1,04  | 2,69E-01 | 5,45E-01 |
| <i>ATP2A1</i>          | -1,06 | 2,69E-01 | 5,45E-01 |
| <i>THC2315543</i>      | 1,04  | 2,69E-01 | 5,45E-01 |
| <i>NR2F1</i>           | -1,08 | 2,69E-01 | 5,45E-01 |
| <i>THC2446542</i>      | 1,04  | 2,69E-01 | 5,45E-01 |

|                        |       |          |          |
|------------------------|-------|----------|----------|
| <i>MYL1</i>            | -1,07 | 2,69E-01 | 5,45E-01 |
| <i>KIFC3</i>           | 1,05  | 2,69E-01 | 5,45E-01 |
| <i>RP4-724E16.2</i>    | 1,04  | 2,70E-01 | 5,46E-01 |
| <i>CARD11</i>          | 1,05  | 2,70E-01 | 5,46E-01 |
| <i>ALS2CL</i>          | 1,06  | 2,70E-01 | 5,46E-01 |
| <i>BM999343</i>        | 1,08  | 2,70E-01 | 5,46E-01 |
| <i>RAMP3</i>           | 1,12  | 2,70E-01 | 5,46E-01 |
| <i>RAP2C</i>           | -1,06 | 2,70E-01 | 5,46E-01 |
| <i>CLTC</i>            | -1,05 | 2,70E-01 | 5,46E-01 |
| <i>THC2447272</i>      | -1,05 | 2,70E-01 | 5,46E-01 |
| <i>GLG1</i>            | -1,04 | 2,70E-01 | 5,46E-01 |
| <i>OTUD5</i>           | -1,04 | 2,70E-01 | 5,46E-01 |
| <i>CNOT6</i>           | -1,03 | 2,70E-01 | 5,46E-01 |
| <i>ESPN</i>            | 1,03  | 2,70E-01 | 5,46E-01 |
| <i>NIPBL</i>           | 1,04  | 2,70E-01 | 5,46E-01 |
| <i>TAS2R60</i>         | 1,04  | 2,70E-01 | 5,46E-01 |
| <i>H92965</i>          | 1,04  | 2,70E-01 | 5,46E-01 |
| <i>ZNF336</i>          | 1,05  | 2,70E-01 | 5,46E-01 |
| <i>RASA4</i>           | -1,06 | 2,70E-01 | 5,46E-01 |
| <i>BC029927</i>        | 1,04  | 2,70E-01 | 5,46E-01 |
| <i>DIXDC1</i>          | 1,08  | 2,70E-01 | 5,46E-01 |
| <i>SSB</i>             | 1,03  | 2,70E-01 | 5,46E-01 |
| <i>SLC7A4</i>          | -1,11 | 2,70E-01 | 5,46E-01 |
| <i>FBXO8</i>           | -1,05 | 2,70E-01 | 5,46E-01 |
| <i>FAM24A</i>          | -1,05 | 2,70E-01 | 5,46E-01 |
| <i>CXorf20</i>         | -1,05 | 2,70E-01 | 5,46E-01 |
| <i>ENST00000376097</i> | 1,04  | 2,70E-01 | 5,46E-01 |
| <i>HNRPA3</i>          | 1,04  | 2,70E-01 | 5,46E-01 |
| <i>COL24A1</i>         | -1,12 | 2,70E-01 | 5,46E-01 |
| <i>THC2377654</i>      | 1,04  | 2,70E-01 | 5,46E-01 |
| <i>KIAA1627</i>        | -1,04 | 2,70E-01 | 5,46E-01 |
| <i>IFITM3</i>          | -1,05 | 2,71E-01 | 5,46E-01 |
| <i>ALKBH3</i>          | 1,03  | 2,71E-01 | 5,46E-01 |
| <i>PRR6</i>            | -1,08 | 2,71E-01 | 5,46E-01 |
| <i>A_24_P98145</i>     | -1,04 | 2,71E-01 | 5,46E-01 |
| <i>AI570094</i>        | 1,05  | 2,71E-01 | 5,47E-01 |
| <i>TIE1</i>            | 1,08  | 2,71E-01 | 5,47E-01 |
| <i>THC2384815</i>      | 1,07  | 2,71E-01 | 5,47E-01 |
| <i>SULT2B1</i>         | -1,19 | 2,71E-01 | 5,47E-01 |
| <i>FLJ43692</i>        | 1,07  | 2,71E-01 | 5,47E-01 |
| <i>A_24_P916453</i>    | -1,04 | 2,71E-01 | 5,47E-01 |
| <i>CPD</i>             | 1,03  | 2,71E-01 | 5,47E-01 |
| <i>LSM14A</i>          | -1,03 | 2,71E-01 | 5,47E-01 |
| <i>BQ017268</i>        | 1,06  | 2,71E-01 | 5,47E-01 |

|                 |       |          |          |
|-----------------|-------|----------|----------|
| A_23_P113101    | -1,06 | 2,71E-01 | 5,47E-01 |
| LCE2C           | -1,05 | 2,71E-01 | 5,47E-01 |
| SLC10A2         | -1,05 | 2,71E-01 | 5,47E-01 |
| A_32_P83174     | 1,03  | 2,71E-01 | 5,47E-01 |
| CER1            | 1,04  | 2,71E-01 | 5,47E-01 |
| LOC541469       | 1,05  | 2,71E-01 | 5,47E-01 |
| RGS1            | 1,35  | 2,71E-01 | 5,47E-01 |
| SF3B5           | 1,03  | 2,71E-01 | 5,47E-01 |
| RFWD2           | -1,05 | 2,71E-01 | 5,47E-01 |
| ENST00000270238 | 1,04  | 2,71E-01 | 5,47E-01 |
| DHRS4           | 1,04  | 2,71E-01 | 5,47E-01 |
| MOS             | 1,04  | 2,71E-01 | 5,47E-01 |
| RP6-166C19.1    | 1,05  | 2,71E-01 | 5,47E-01 |
| PRL             | 1,05  | 2,71E-01 | 5,47E-01 |
| CFL2            | 1,13  | 2,71E-01 | 5,47E-01 |
| THC2319353      | -1,04 | 2,71E-01 | 5,47E-01 |
| OR4C15          | 1,05  | 2,71E-01 | 5,47E-01 |
| AK025947        | -1,04 | 2,72E-01 | 5,47E-01 |
| GPR63           | 1,05  | 2,72E-01 | 5,47E-01 |
| ENST00000353250 | -1,07 | 2,72E-01 | 5,48E-01 |
| MAGEA2B         | -1,04 | 2,72E-01 | 5,48E-01 |
| ENST00000372583 | -1,06 | 2,72E-01 | 5,48E-01 |
| CD79B           | 1,11  | 2,72E-01 | 5,48E-01 |
| ABCA13          | -1,05 | 2,72E-01 | 5,48E-01 |
| KIAA0355        | 1,04  | 2,72E-01 | 5,48E-01 |
| A_24_P409661    | -1,09 | 2,72E-01 | 5,48E-01 |
| DKFZP779L1068   | 1,04  | 2,72E-01 | 5,48E-01 |
| A_32_P177741    | 1,04  | 2,72E-01 | 5,48E-01 |
| BE531123        | 1,05  | 2,72E-01 | 5,48E-01 |
| AK098699        | -1,04 | 2,72E-01 | 5,48E-01 |
| NET1            | -1,08 | 2,72E-01 | 5,48E-01 |
| MSH2            | -1,05 | 2,72E-01 | 5,48E-01 |
| THC2446936      | 1,06  | 2,72E-01 | 5,48E-01 |
| THC2313897      | -1,05 | 2,72E-01 | 5,48E-01 |
| C6orf61         | -1,04 | 2,72E-01 | 5,48E-01 |
| MRPL40          | -1,03 | 2,72E-01 | 5,48E-01 |
| BC079833        | 1,04  | 2,72E-01 | 5,48E-01 |
| ENST00000315293 | 1,05  | 2,72E-01 | 5,48E-01 |
| CKS2            | 1,07  | 2,72E-01 | 5,48E-01 |
| ENST00000372821 | -1,06 | 2,73E-01 | 5,49E-01 |
| ABCC10          | -1,05 | 2,73E-01 | 5,49E-01 |
| NR3C1           | 1,05  | 2,73E-01 | 5,49E-01 |
| ENST00000264777 | 1,07  | 2,73E-01 | 5,49E-01 |
| A_32_P234913    | 1,06  | 2,73E-01 | 5,49E-01 |



|                        |       |          |          |
|------------------------|-------|----------|----------|
| <i>TSPAN2</i>          | 1,18  | 2,73E-01 | 5,49E-01 |
| <i>THC2449398</i>      | -1,04 | 2,73E-01 | 5,49E-01 |
| <i>ENST00000371970</i> | -1,04 | 2,73E-01 | 5,49E-01 |
| <i>FGF23</i>           | -1,03 | 2,73E-01 | 5,50E-01 |
| <i>ELF3</i>            | -1,15 | 2,73E-01 | 5,50E-01 |
| <i>THC2379144</i>      | -1,07 | 2,73E-01 | 5,50E-01 |
| <i>FLJ40243</i>        | -1,04 | 2,73E-01 | 5,50E-01 |
| <i>CCDC114</i>         | 1,04  | 2,73E-01 | 5,50E-01 |
| <i>LOC339105</i>       | 1,04  | 2,73E-01 | 5,50E-01 |
| <i>X62691</i>          | 1,05  | 2,73E-01 | 5,50E-01 |
| <i>THC2286893</i>      | 1,05  | 2,73E-01 | 5,50E-01 |
| <i>SCML1</i>           | 1,05  | 2,73E-01 | 5,50E-01 |
| <i>SLC5A7</i>          | 1,07  | 2,73E-01 | 5,50E-01 |
| <i>WDR19</i>           | -1,05 | 2,74E-01 | 5,50E-01 |
| <i>NT5C1A</i>          | 1,05  | 2,74E-01 | 5,50E-01 |
| <i>A_24_P933984</i>    | -1,04 | 2,74E-01 | 5,50E-01 |
| <i>AK123481</i>        | -1,07 | 2,74E-01 | 5,50E-01 |
| <i>PACRG</i>           | -1,06 | 2,74E-01 | 5,50E-01 |
| <i>FASN</i>            | -1,05 | 2,74E-01 | 5,50E-01 |
| <i>C11orf2</i>         | 1,06  | 2,74E-01 | 5,50E-01 |
| <i>AF111848</i>        | 1,04  | 2,74E-01 | 5,50E-01 |
| <i>THC2339590</i>      | -1,06 | 2,74E-01 | 5,50E-01 |
| <i>A_24_P332441</i>    | -1,04 | 2,74E-01 | 5,50E-01 |
| <i>PB1</i>             | 1,05  | 2,74E-01 | 5,50E-01 |
| <i>A_24_P910169</i>    | 1,06  | 2,74E-01 | 5,50E-01 |
| <i>TCP10L2</i>         | -1,04 | 2,74E-01 | 5,51E-01 |
| <i>ENST00000380769</i> | 1,03  | 2,74E-01 | 5,51E-01 |
| <i>AJAP1</i>           | -1,14 | 2,75E-01 | 5,51E-01 |
| <i>A_24_P136011</i>    | -1,05 | 2,74E-01 | 5,51E-01 |
| <i>C6orf166</i>        | 1,04  | 2,74E-01 | 5,51E-01 |
| <i>APCDD1L</i>         | -1,23 | 2,75E-01 | 5,51E-01 |
| <i>AK057167</i>        | -1,06 | 2,75E-01 | 5,51E-01 |
| <i>A_24_P915443</i>    | -1,05 | 2,75E-01 | 5,51E-01 |
| <i>FLJ30294</i>        | -1,04 | 2,75E-01 | 5,51E-01 |
| <i>XYLB</i>            | -1,03 | 2,75E-01 | 5,51E-01 |
| <i>LRP16</i>           | 1,05  | 2,75E-01 | 5,51E-01 |
| <i>SEMA3F</i>          | 1,06  | 2,75E-01 | 5,51E-01 |
| <i>THC2445784</i>      | -1,04 | 2,75E-01 | 5,51E-01 |
| <i>CN479762</i>        | 1,28  | 2,75E-01 | 5,51E-01 |
| <i>A_24_P912617</i>    | 1,04  | 2,75E-01 | 5,52E-01 |
| <i>DDX50</i>           | -1,05 | 2,75E-01 | 5,52E-01 |
| <i>OR4D2</i>           | 1,06  | 2,75E-01 | 5,52E-01 |
| <i>SERINC5</i>         | 1,06  | 2,75E-01 | 5,52E-01 |
| <i>MCM7</i>            | -1,08 | 2,75E-01 | 5,52E-01 |

|                        |       |          |          |
|------------------------|-------|----------|----------|
| <i>C1orf123</i>        | -1,06 | 2,75E-01 | 5,52E-01 |
| <i>TTC13</i>           | -1,04 | 2,75E-01 | 5,52E-01 |
| <i>EIF4EBP1</i>        | -1,06 | 2,75E-01 | 5,52E-01 |
| <i>SFXN5</i>           | -1,05 | 2,75E-01 | 5,52E-01 |
| <i>SMCX</i>            | -1,03 | 2,75E-01 | 5,52E-01 |
| <i>AK024336</i>        | 1,05  | 2,75E-01 | 5,52E-01 |
| <i>TMEM31</i>          | -1,06 | 2,75E-01 | 5,52E-01 |
| <i>RPL32</i>           | -1,04 | 2,75E-01 | 5,52E-01 |
| <i>WFDC11</i>          | 1,05  | 2,75E-01 | 5,52E-01 |
| <i>SAMD9L</i>          | -1,06 | 2,75E-01 | 5,52E-01 |
| <i>ENST00000338772</i> | 1,04  | 2,75E-01 | 5,52E-01 |
| <i>AA908257</i>        | -1,03 | 2,75E-01 | 5,52E-01 |
| <i>ITGB8</i>           | 1,13  | 2,75E-01 | 5,52E-01 |
| <i>BE044555</i>        | 1,04  | 2,76E-01 | 5,52E-01 |
| <i>DNAJC13</i>         | -1,05 | 2,76E-01 | 5,52E-01 |
| <i>LOC341604</i>       | 1,12  | 2,76E-01 | 5,52E-01 |
| <i>AK023264</i>        | -1,05 | 2,76E-01 | 5,52E-01 |
| <i>SCC-112</i>         | -1,03 | 2,76E-01 | 5,52E-01 |
| <i>MUC2</i>            | 1,04  | 2,76E-01 | 5,52E-01 |
| <i>A_24_P255324</i>    | 1,04  | 2,76E-01 | 5,52E-01 |
| <i>GALNT2</i>          | 1,05  | 2,76E-01 | 5,52E-01 |
| <i>FCRLM1</i>          | 1,04  | 2,76E-01 | 5,53E-01 |
| <i>AI203371</i>        | -1,04 | 2,76E-01 | 5,53E-01 |
| <i>MGAT2</i>           | -1,06 | 2,76E-01 | 5,53E-01 |
| <i>NOL1</i>            | -1,06 | 2,76E-01 | 5,53E-01 |
| <i>TPRKB</i>           | -1,05 | 2,76E-01 | 5,53E-01 |
| <i>GPR35</i>           | -1,06 | 2,76E-01 | 5,53E-01 |
| <i>C11orf67</i>        | -1,05 | 2,76E-01 | 5,53E-01 |
| <i>ENST00000373219</i> | -1,04 | 2,76E-01 | 5,53E-01 |
| <i>A_24_P932958</i>    | 1,04  | 2,76E-01 | 5,53E-01 |
| <i>UBB</i>             | 1,06  | 2,76E-01 | 5,53E-01 |
| <i>DNHD2</i>           | 1,10  | 2,76E-01 | 5,53E-01 |
| <i>AB011119</i>        | -1,09 | 2,76E-01 | 5,53E-01 |
| <i>REPS1</i>           | -1,06 | 2,76E-01 | 5,53E-01 |
| <i>ATP6V1A</i>         | -1,05 | 2,76E-01 | 5,53E-01 |
| <i>IRGC</i>            | 1,04  | 2,76E-01 | 5,53E-01 |
| <i>A_24_P780393</i>    | 1,05  | 2,76E-01 | 5,53E-01 |
| <i>MMRN2</i>           | 1,05  | 2,76E-01 | 5,53E-01 |
| <i>INHBB</i>           | 1,24  | 2,76E-01 | 5,53E-01 |
| <i>IRF5</i>            | -1,17 | 2,76E-01 | 5,53E-01 |
| <i>MGC102966</i>       | 1,44  | 2,76E-01 | 5,53E-01 |
| <i>THC2448178</i>      | -1,07 | 2,76E-01 | 5,53E-01 |
| <i>THC2395432</i>      | 1,05  | 2,76E-01 | 5,53E-01 |
| <i>CD81</i>            | -1,06 | 2,76E-01 | 5,53E-01 |

|                        |       |          |          |
|------------------------|-------|----------|----------|
| <i>TRIM39</i>          | -1,05 | 2,76E-01 | 5,53E-01 |
| <i>A_32_P9861</i>      | 1,04  | 2,76E-01 | 5,53E-01 |
| <i>THC2413414</i>      | 1,05  | 2,77E-01 | 5,53E-01 |
| <i>DYNLT1</i>          | 1,06  | 2,76E-01 | 5,53E-01 |
| <i>MGC39584</i>        | 1,10  | 2,76E-01 | 5,53E-01 |
| <i>GPSN2</i>           | -1,05 | 2,77E-01 | 5,53E-01 |
| <i>SYT16</i>           | -1,05 | 2,77E-01 | 5,53E-01 |
| <i>FEM1A</i>           | 1,04  | 2,77E-01 | 5,53E-01 |
| <i>CR626626</i>        | 1,04  | 2,77E-01 | 5,53E-01 |
| <i>ITSN1</i>           | 1,05  | 2,77E-01 | 5,53E-01 |
| <i>ENST00000297423</i> | -1,04 | 2,77E-01 | 5,53E-01 |
| <i>PRKG2</i>           | 1,05  | 2,77E-01 | 5,53E-01 |
| <i>THC2455149</i>      | -1,05 | 2,77E-01 | 5,53E-01 |
| <i>CTSE</i>            | 1,04  | 2,77E-01 | 5,53E-01 |
| <i>SLC6A14</i>         | -1,04 | 2,77E-01 | 5,53E-01 |
| <i>SEMA3E</i>          | 1,19  | 2,77E-01 | 5,53E-01 |
| <i>CRY2</i>            | 1,07  | 2,77E-01 | 5,54E-01 |
| <i>SUCLA2</i>          | -1,06 | 2,77E-01 | 5,54E-01 |
| <i>A_24_P238666</i>    | -1,03 | 2,77E-01 | 5,54E-01 |
| <i>MGC19604</i>        | -1,04 | 2,77E-01 | 5,54E-01 |
| <i>NTRK1</i>           | -1,06 | 2,77E-01 | 5,54E-01 |
| <i>A_32_P121226</i>    | 1,04  | 2,77E-01 | 5,54E-01 |
| <i>CK820941</i>        | -1,09 | 2,77E-01 | 5,54E-01 |
| <i>POLH</i>            | -1,04 | 2,77E-01 | 5,54E-01 |
| <i>THC2271549</i>      | 1,07  | 2,77E-01 | 5,54E-01 |
| <i>ENST00000328458</i> | -1,03 | 2,78E-01 | 5,54E-01 |
| <i>CHMP7</i>           | 1,03  | 2,78E-01 | 5,54E-01 |
| <i>GJB3</i>            | 1,05  | 2,78E-01 | 5,54E-01 |
| <i>SNRK</i>            | -1,05 | 2,78E-01 | 5,54E-01 |
| <i>AL512694</i>        | 1,04  | 2,78E-01 | 5,55E-01 |
| <i>CCL20</i>           | 1,04  | 2,78E-01 | 5,55E-01 |
| <i>ENST00000373218</i> | -1,03 | 2,78E-01 | 5,55E-01 |
| <i>A_23_P415806</i>    | 1,05  | 2,78E-01 | 5,55E-01 |
| <i>TLX3</i>            | 1,05  | 2,78E-01 | 5,55E-01 |
| <i>AGMAT</i>           | -1,04 | 2,78E-01 | 5,55E-01 |
| <i>MYOZ1</i>           | 1,18  | 2,78E-01 | 5,55E-01 |
| <i>KIF21A</i>          | -1,19 | 2,78E-01 | 5,55E-01 |
| <i>ITGA11</i>          | -1,12 | 2,78E-01 | 5,55E-01 |
| <i>LAMA1</i>           | -1,09 | 2,78E-01 | 5,55E-01 |
| <i>CR592483</i>        | 1,04  | 2,78E-01 | 5,55E-01 |
| <i>CV569217</i>        | -1,04 | 2,78E-01 | 5,55E-01 |
| <i>ENST00000315302</i> | 1,03  | 2,78E-01 | 5,55E-01 |
| <i>SFRS12</i>          | 1,04  | 2,78E-01 | 5,55E-01 |
| <i>SMAD6</i>           | 1,07  | 2,78E-01 | 5,55E-01 |

|                        |       |          |          |
|------------------------|-------|----------|----------|
| <i>A_24_P298744</i>    | -1,05 | 2,78E-01 | 5,55E-01 |
| <i>DHX34</i>           | 1,03  | 2,78E-01 | 5,55E-01 |
| <i>ENST00000368503</i> | -1,09 | 2,78E-01 | 5,55E-01 |
| <i>LACRT</i>           | 1,04  | 2,78E-01 | 5,55E-01 |
| <i>THC2287533</i>      | 1,04  | 2,78E-01 | 5,55E-01 |
| <i>THC2288632</i>      | -1,05 | 2,78E-01 | 5,55E-01 |
| <i>DNAH9</i>           | -1,03 | 2,78E-01 | 5,55E-01 |
| <i>OCA2</i>            | 1,12  | 2,79E-01 | 5,55E-01 |
| <i>LOC388817</i>       | 1,04  | 2,79E-01 | 5,56E-01 |
| <i>KIF6</i>            | -1,04 | 2,79E-01 | 5,56E-01 |
| <i>AK092090</i>        | -1,04 | 2,79E-01 | 5,56E-01 |
| <i>SLFN13</i>          | 1,04  | 2,79E-01 | 5,56E-01 |
| <i>ZBTB7A</i>          | 1,04  | 2,79E-01 | 5,56E-01 |
| <i>PHKA1</i>           | 1,05  | 2,79E-01 | 5,56E-01 |
| <i>SPTY2D1</i>         | 1,05  | 2,79E-01 | 5,56E-01 |
| <i>AK125038</i>        | 1,11  | 2,79E-01 | 5,56E-01 |
| <i>SFN</i>             | 1,17  | 2,79E-01 | 5,56E-01 |
| <i>SLFNL1</i>          | -1,03 | 2,79E-01 | 5,56E-01 |
| <i>T11922</i>          | 1,05  | 2,79E-01 | 5,56E-01 |
| <i>IL4R</i>            | 1,07  | 2,79E-01 | 5,56E-01 |
| <i>A_24_P943866</i>    | -1,08 | 2,79E-01 | 5,56E-01 |
| <i>TBC1D1</i>          | -1,12 | 2,80E-01 | 5,57E-01 |
| <i>A_24_P539226</i>    | -1,07 | 2,80E-01 | 5,57E-01 |
| <i>THC2310998</i>      | -1,06 | 2,80E-01 | 5,57E-01 |
| <i>GSDM1</i>           | -1,05 | 2,80E-01 | 5,57E-01 |
| <i>BC036626</i>        | -1,05 | 2,80E-01 | 5,57E-01 |
| <i>TAS2R48</i>         | -1,05 | 2,80E-01 | 5,57E-01 |
| <i>AL117528</i>        | -1,04 | 2,80E-01 | 5,57E-01 |
| <i>AA906057</i>        | 1,05  | 2,80E-01 | 5,57E-01 |
| <i>PHLDA3</i>          | 1,05  | 2,80E-01 | 5,57E-01 |
| <i>LOC388743</i>       | 1,05  | 2,80E-01 | 5,57E-01 |
| <i>THC2249938</i>      | 1,15  | 2,80E-01 | 5,57E-01 |
| <i>AA768919</i>        | -1,05 | 2,80E-01 | 5,57E-01 |
| <i>KCNA6</i>           | -1,04 | 2,80E-01 | 5,57E-01 |
| <i>ENST00000192788</i> | 1,04  | 2,80E-01 | 5,57E-01 |
| <i>GLMN</i>            | -1,04 | 2,80E-01 | 5,57E-01 |
| <i>ENST00000257704</i> | 1,04  | 2,80E-01 | 5,57E-01 |
| <i>RPRC1</i>           | 1,07  | 2,80E-01 | 5,57E-01 |
| <i>RCOR3</i>           | -1,05 | 2,80E-01 | 5,57E-01 |
| <i>BU618765</i>        | -1,05 | 2,80E-01 | 5,58E-01 |
| <i>RC5</i>             | 1,03  | 2,80E-01 | 5,58E-01 |
| <i>HIVEP3</i>          | 1,03  | 2,80E-01 | 5,58E-01 |
| <i>F10881</i>          | 1,04  | 2,80E-01 | 5,58E-01 |
| <i>C15orf48</i>        | -1,22 | 2,80E-01 | 5,58E-01 |

|                 |       |          |          |
|-----------------|-------|----------|----------|
| USP45           | 1,03  | 2,80E-01 | 5,58E-01 |
| AI355433        | 1,03  | 2,80E-01 | 5,58E-01 |
| FLJ32569        | 1,05  | 2,80E-01 | 5,58E-01 |
| BC013171        | 1,08  | 2,80E-01 | 5,58E-01 |
| LST1            | -1,08 | 2,80E-01 | 5,58E-01 |
| ZFHX2           | 1,08  | 2,80E-01 | 5,58E-01 |
| L31408          | 1,05  | 2,81E-01 | 5,58E-01 |
| TFEC            | -1,05 | 2,81E-01 | 5,58E-01 |
| PHKG2           | -1,03 | 2,81E-01 | 5,58E-01 |
| RPAIN           | 1,04  | 2,81E-01 | 5,58E-01 |
| BM983519        | 1,04  | 2,81E-01 | 5,58E-01 |
| ENST00000264899 | 1,05  | 2,81E-01 | 5,58E-01 |
| AQP1            | 1,05  | 2,81E-01 | 5,58E-01 |
| BC024155        | 1,06  | 2,81E-01 | 5,58E-01 |
| LOC643668       | 1,06  | 2,81E-01 | 5,58E-01 |
| DCTN1           | 1,04  | 2,81E-01 | 5,58E-01 |
| ZNF689          | 1,04  | 2,81E-01 | 5,58E-01 |
| SDS             | -1,10 | 2,81E-01 | 5,58E-01 |
| AK027225        | -1,06 | 2,81E-01 | 5,58E-01 |
| BC043255        | 1,05  | 2,81E-01 | 5,58E-01 |
| AK026466        | -1,04 | 2,81E-01 | 5,58E-01 |
| HLA-DPB2        | -1,07 | 2,81E-01 | 5,58E-01 |
| CNKSR2          | -1,05 | 2,81E-01 | 5,58E-01 |
| ENST00000302096 | 1,06  | 2,81E-01 | 5,58E-01 |
| FBXO16          | -1,20 | 2,81E-01 | 5,58E-01 |
| NYD-SP18        | 1,06  | 2,81E-01 | 5,58E-01 |
| A_24_P543779    | -1,04 | 2,81E-01 | 5,58E-01 |
| STAMBP          | -1,03 | 2,81E-01 | 5,58E-01 |
| ENST00000274361 | -1,04 | 2,81E-01 | 5,58E-01 |
| FAM117A         | 1,05  | 2,81E-01 | 5,59E-01 |
| THAP5           | 1,06  | 2,81E-01 | 5,59E-01 |
| SUGT1L1         | -1,04 | 2,82E-01 | 5,59E-01 |
| ENST00000273582 | 1,03  | 2,82E-01 | 5,59E-01 |
| DB301332        | 1,05  | 2,82E-01 | 5,59E-01 |
| A_32_P103966    | 1,12  | 2,82E-01 | 5,59E-01 |
| THC2458867      | -1,04 | 2,82E-01 | 5,59E-01 |
| GMFG            | -1,07 | 2,82E-01 | 5,59E-01 |
| ZNF694          | -1,05 | 2,82E-01 | 5,59E-01 |
| PPP1R2P9        | 1,04  | 2,82E-01 | 5,59E-01 |
| THC2281660      | -1,09 | 2,82E-01 | 5,59E-01 |
| ENST00000258775 | 1,07  | 2,82E-01 | 5,59E-01 |
| VASN            | 1,09  | 2,82E-01 | 5,59E-01 |
| FLJ38964        | -1,04 | 2,82E-01 | 5,60E-01 |
| ENST00000305608 | -1,03 | 2,82E-01 | 5,60E-01 |

|                        |       |          |          |
|------------------------|-------|----------|----------|
| <i>A_24_P701814</i>    | 1,05  | 2,82E-01 | 5,60E-01 |
| <i>RP11-217H1.1</i>    | 1,04  | 2,82E-01 | 5,60E-01 |
| <i>BC034308</i>        | 1,04  | 2,82E-01 | 5,60E-01 |
| <i>LOC155006</i>       | 1,04  | 2,82E-01 | 5,60E-01 |
| <i>MICAL3</i>          | -1,07 | 2,82E-01 | 5,60E-01 |
| <i>SLC6A2</i>          | -1,07 | 2,82E-01 | 5,60E-01 |
| <i>A_32_P51313</i>     | -1,05 | 2,82E-01 | 5,60E-01 |
| <i>LOC653256</i>       | -1,05 | 2,82E-01 | 5,60E-01 |
| <i>ENST00000266058</i> | -1,04 | 2,82E-01 | 5,60E-01 |
| <i>ESRRB</i>           | -1,04 | 2,82E-01 | 5,60E-01 |
| <i>C10orf78</i>        | 1,05  | 2,82E-01 | 5,60E-01 |
| <i>PNPLA2</i>          | 1,06  | 2,82E-01 | 5,60E-01 |
| <i>ENST00000222543</i> | 1,09  | 2,83E-01 | 5,60E-01 |
| <i>A_24_P682579</i>    | -1,05 | 2,83E-01 | 5,60E-01 |
| <i>PRR13</i>           | -1,04 | 2,83E-01 | 5,60E-01 |
| <i>PTBP2</i>           | -1,08 | 2,83E-01 | 5,60E-01 |
| <i>BU678941</i>        | 1,08  | 2,83E-01 | 5,60E-01 |
| <i>A_24_P349756</i>    | 1,07  | 2,83E-01 | 5,61E-01 |
| <i>FLJ22596</i>        | -1,29 | 2,83E-01 | 5,61E-01 |
| <i>CR611323</i>        | -1,04 | 2,83E-01 | 5,61E-01 |
| <i>PPEF2</i>           | -1,04 | 2,83E-01 | 5,61E-01 |
| <i>WISP2</i>           | -1,28 | 2,83E-01 | 5,61E-01 |
| <i>ZNF2</i>            | -1,04 | 2,83E-01 | 5,61E-01 |
| <i>BX117044</i>        | -1,05 | 2,83E-01 | 5,61E-01 |
| <i>UNQ473</i>          | -1,12 | 2,83E-01 | 5,61E-01 |
| <i>ADHFE1</i>          | -1,11 | 2,83E-01 | 5,61E-01 |
| <i>WDR23</i>           | -1,03 | 2,83E-01 | 5,61E-01 |
| <i>MTHFD2L</i>         | -1,03 | 2,83E-01 | 5,61E-01 |
| <i>AF147398</i>        | 1,04  | 2,83E-01 | 5,61E-01 |
| <i>C22orf32</i>        | -1,05 | 2,83E-01 | 5,61E-01 |
| <i>AK026387</i>        | -1,03 | 2,83E-01 | 5,61E-01 |
| <i>TCF25</i>           | 1,04  | 2,83E-01 | 5,61E-01 |
| <i>AK095895</i>        | 1,05  | 2,83E-01 | 5,61E-01 |
| <i>M69012</i>          | 1,06  | 2,83E-01 | 5,61E-01 |
| <i>CA420307</i>        | -1,08 | 2,83E-01 | 5,61E-01 |
| <i>SIAH2</i>           | -1,07 | 2,84E-01 | 5,61E-01 |
| <i>ENST00000246071</i> | -1,06 | 2,84E-01 | 5,61E-01 |
| <i>DIO1</i>            | 1,04  | 2,84E-01 | 5,61E-01 |
| <i>LOC375449</i>       | 1,05  | 2,84E-01 | 5,61E-01 |
| <i>CD320</i>           | 1,06  | 2,83E-01 | 5,61E-01 |
| <i>RC3H1</i>           | 1,05  | 2,84E-01 | 5,61E-01 |
| <i>SC65</i>            | -1,09 | 2,84E-01 | 5,61E-01 |
| <i>RPL36</i>           | -1,05 | 2,84E-01 | 5,61E-01 |
| <i>A_24_P732439</i>    | -1,04 | 2,84E-01 | 5,61E-01 |

|                        |       |          |          |
|------------------------|-------|----------|----------|
| <i>PSENN</i>           | 1,03  | 2,84E-01 | 5,61E-01 |
| <i>CDH12</i>           | 1,04  | 2,84E-01 | 5,61E-01 |
| <i>AA725389</i>        | 1,04  | 2,84E-01 | 5,61E-01 |
| <i>ELMO1</i>           | 1,05  | 2,84E-01 | 5,61E-01 |
| <i>SOX8</i>            | 1,08  | 2,84E-01 | 5,61E-01 |
| <i>ATOH8</i>           | 1,13  | 2,84E-01 | 5,61E-01 |
| <i>FSD1L</i>           | -1,04 | 2,84E-01 | 5,61E-01 |
| <i>GTPBP5</i>          | -1,04 | 2,84E-01 | 5,61E-01 |
| <i>AK057458</i>        | 1,05  | 2,84E-01 | 5,61E-01 |
| <i>AKAP10</i>          | -1,05 | 2,84E-01 | 5,62E-01 |
| <i>TNFSF13B</i>        | -1,06 | 2,84E-01 | 5,62E-01 |
| <i>AK026459</i>        | -1,06 | 2,84E-01 | 5,62E-01 |
| <i>A_24_P391853</i>    | 1,06  | 2,84E-01 | 5,62E-01 |
| <i>A_32_P38806</i>     | -1,05 | 2,84E-01 | 5,62E-01 |
| <i>A_32_P10643</i>     | 1,05  | 2,84E-01 | 5,62E-01 |
| <i>MATN2</i>           | -1,09 | 2,84E-01 | 5,62E-01 |
| <i>GBGT1</i>           | 1,05  | 2,84E-01 | 5,62E-01 |
| <i>A_32_P52153</i>     | 1,09  | 2,84E-01 | 5,62E-01 |
| <i>BC002741</i>        | 1,04  | 2,84E-01 | 5,62E-01 |
| <i>XRCC2</i>           | -1,03 | 2,84E-01 | 5,62E-01 |
| <i>NEU2</i>            | 1,04  | 2,84E-01 | 5,62E-01 |
| <i>ZNF256</i>          | 1,04  | 2,85E-01 | 5,62E-01 |
| <i>A_32_P70027</i>     | 1,04  | 2,85E-01 | 5,62E-01 |
| <i>FLJ10292</i>        | -1,07 | 2,85E-01 | 5,62E-01 |
| <i>WARS2</i>           | 1,06  | 2,85E-01 | 5,62E-01 |
| <i>MLL4</i>            | -1,04 | 2,85E-01 | 5,62E-01 |
| <i>TREH</i>            | 1,05  | 2,85E-01 | 5,62E-01 |
| <i>NEGR1</i>           | 1,09  | 2,85E-01 | 5,62E-01 |
| <i>THC2242915</i>      | -1,04 | 2,85E-01 | 5,62E-01 |
| <i>CNDP1</i>           | -1,06 | 2,85E-01 | 5,62E-01 |
| <i>RNF8</i>            | -1,04 | 2,85E-01 | 5,62E-01 |
| <i>PDPN</i>            | -1,12 | 2,85E-01 | 5,62E-01 |
| <i>AK125389</i>        | 1,05  | 2,85E-01 | 5,62E-01 |
| <i>LOC153222</i>       | 1,07  | 2,85E-01 | 5,62E-01 |
| <i>MIXL1</i>           | 1,07  | 2,85E-01 | 5,62E-01 |
| <i>MAG</i>             | -1,07 | 2,85E-01 | 5,62E-01 |
| <i>BC036236</i>        | 1,04  | 2,85E-01 | 5,62E-01 |
| <i>B4GALT6</i>         | 1,06  | 2,85E-01 | 5,62E-01 |
| <i>THC2409357</i>      | 1,10  | 2,85E-01 | 5,62E-01 |
| <i>A_24_P923789</i>    | -1,05 | 2,85E-01 | 5,63E-01 |
| <i>ENST00000329536</i> | -1,05 | 2,85E-01 | 5,63E-01 |
| <i>AP4M1</i>           | 1,05  | 2,85E-01 | 5,63E-01 |
| <i>IL27RA</i>          | -1,05 | 2,85E-01 | 5,63E-01 |
| <i>42248</i>           | -1,05 | 2,85E-01 | 5,63E-01 |

|                        |       |          |          |
|------------------------|-------|----------|----------|
| <i>BC032028</i>        | 1,05  | 2,85E-01 | 5,63E-01 |
| <i>CV323793</i>        | 1,04  | 2,85E-01 | 5,63E-01 |
| <i>COL27A1</i>         | -1,17 | 2,85E-01 | 5,63E-01 |
| <i>GBF1</i>            | -1,05 | 2,85E-01 | 5,63E-01 |
| <i>LOC474170</i>       | 1,07  | 2,85E-01 | 5,63E-01 |
| <i>ENST00000374541</i> | 1,09  | 2,85E-01 | 5,63E-01 |
| <i>WNT6</i>            | 1,05  | 2,86E-01 | 5,63E-01 |
| <i>GRIA3</i>           | 1,11  | 2,86E-01 | 5,63E-01 |
| <i>THC2280664</i>      | 1,12  | 2,86E-01 | 5,63E-01 |
| <i>FNDC1</i>           | 1,36  | 2,86E-01 | 5,63E-01 |
| <i>PCDH11Y</i>         | -1,12 | 2,86E-01 | 5,63E-01 |
| <i>A_24_P471099</i>    | 1,06  | 2,86E-01 | 5,64E-01 |
| <i>RP11-78J21.1</i>    | -1,04 | 2,86E-01 | 5,64E-01 |
| <i>TMEM48</i>          | 1,03  | 2,86E-01 | 5,64E-01 |
| <i>C18orf23</i>        | 1,04  | 2,86E-01 | 5,64E-01 |
| <i>DLX2</i>            | 1,03  | 2,86E-01 | 5,64E-01 |
| <i>LOC203427</i>       | -1,06 | 2,86E-01 | 5,64E-01 |
| <i>AK023757</i>        | -1,05 | 2,86E-01 | 5,64E-01 |
| <i>MC3R</i>            | 1,04  | 2,86E-01 | 5,64E-01 |
| <i>ENST00000380438</i> | -1,07 | 2,86E-01 | 5,64E-01 |
| <i>ZNF28</i>           | -1,05 | 2,86E-01 | 5,64E-01 |
| <i>DKFZP686A10121</i>  | -1,04 | 2,86E-01 | 5,64E-01 |
| <i>XKR6</i>            | -1,04 | 2,86E-01 | 5,64E-01 |
| <i>DBF4B</i>           | -1,03 | 2,86E-01 | 5,64E-01 |
| <i>SERPINB10</i>       | 1,05  | 2,86E-01 | 5,64E-01 |
| <i>EIF4G3</i>          | 1,05  | 2,86E-01 | 5,64E-01 |
| <i>ENST00000321566</i> | -1,03 | 2,86E-01 | 5,64E-01 |
| <i>LOC402694</i>       | -1,03 | 2,86E-01 | 5,64E-01 |
| <i>THC2449905</i>      | -1,10 | 2,86E-01 | 5,64E-01 |
| <i>ODF4</i>            | 1,04  | 2,86E-01 | 5,64E-01 |
| <i>A_24_P788373</i>    | 1,03  | 2,86E-01 | 5,64E-01 |
| <i>THC2319138</i>      | -1,06 | 2,87E-01 | 5,64E-01 |
| <i>RHBDD1</i>          | -1,05 | 2,87E-01 | 5,64E-01 |
| <i>C10orf92</i>        | -1,05 | 2,87E-01 | 5,64E-01 |
| <i>LOC401393</i>       | 1,03  | 2,87E-01 | 5,64E-01 |
| <i>CA2</i>             | 1,06  | 2,87E-01 | 5,64E-01 |
| <i>NAPE-PLD</i>        | -1,04 | 2,87E-01 | 5,64E-01 |
| <i>RHEB</i>            | 1,06  | 2,87E-01 | 5,64E-01 |
| <i>A_24_P281025</i>    | 1,07  | 2,87E-01 | 5,64E-01 |
| <i>AL571926</i>        | 1,07  | 2,87E-01 | 5,64E-01 |
| <i>XAGE3</i>           | -1,05 | 2,87E-01 | 5,64E-01 |
| <i>BACH2</i>           | -1,11 | 2,87E-01 | 5,65E-01 |
| <i>TTC8</i>            | -1,05 | 2,87E-01 | 5,65E-01 |
| <i>CV326037</i>        | 1,04  | 2,87E-01 | 5,65E-01 |



|                        |       |          |          |
|------------------------|-------|----------|----------|
| <i>C14orf132</i>       | -1,09 | 2,87E-01 | 5,65E-01 |
| <i>HS6ST3</i>          | -1,07 | 2,87E-01 | 5,65E-01 |
| <i>POMC</i>            | -1,09 | 2,87E-01 | 5,65E-01 |
| <i>LOC645294</i>       | -1,07 | 2,87E-01 | 5,65E-01 |
| <i>BQ188788</i>        | -1,06 | 2,87E-01 | 5,65E-01 |
| <i>AK022594</i>        | -1,06 | 2,87E-01 | 5,65E-01 |
| <i>AK025576</i>        | -1,05 | 2,87E-01 | 5,65E-01 |
| <i>ENST00000312528</i> | -1,04 | 2,87E-01 | 5,65E-01 |
| <i>COMMD5</i>          | -1,04 | 2,87E-01 | 5,65E-01 |
| <i>C14orf142</i>       | 1,03  | 2,87E-01 | 5,65E-01 |
| <i>LCE4A</i>           | 1,04  | 2,87E-01 | 5,65E-01 |
| <i>ENST00000312958</i> | 1,05  | 2,87E-01 | 5,65E-01 |
| <i>NP186050</i>        | 1,05  | 2,87E-01 | 5,65E-01 |
| <i>AJ297349</i>        | 1,06  | 2,87E-01 | 5,65E-01 |
| <i>ATG10</i>           | 1,04  | 2,87E-01 | 5,65E-01 |
| <i>A_32_P229447</i>    | 1,06  | 2,87E-01 | 5,65E-01 |
| <i>OR2B6</i>           | 1,04  | 2,88E-01 | 5,65E-01 |
| <i>PRKX</i>            | -1,06 | 2,88E-01 | 5,65E-01 |
| <i>BC034792</i>        | -1,03 | 2,88E-01 | 5,65E-01 |
| <i>PRH2</i>            | 1,04  | 2,88E-01 | 5,65E-01 |
| <i>A_24_P599237</i>    | -1,04 | 2,88E-01 | 5,65E-01 |
| <i>UBADC1</i>          | 1,04  | 2,88E-01 | 5,65E-01 |
| <i>GHRL</i>            | -1,04 | 2,88E-01 | 5,65E-01 |
| <i>PDCD7</i>           | -1,03 | 2,88E-01 | 5,65E-01 |
| <i>CKAP1</i>           | 1,04  | 2,88E-01 | 5,65E-01 |
| <i>THC2337372</i>      | 1,06  | 2,88E-01 | 5,65E-01 |
| <i>ENST00000304181</i> | 1,03  | 2,88E-01 | 5,65E-01 |
| <i>FGL1</i>            | 1,03  | 2,88E-01 | 5,66E-01 |
| <i>U22172</i>          | -1,04 | 2,88E-01 | 5,66E-01 |
| <i>A_32_P101653</i>    | 1,04  | 2,88E-01 | 5,66E-01 |
| <i>INPP4B</i>          | 1,09  | 2,88E-01 | 5,66E-01 |
| <i>HCN4</i>            | 1,05  | 2,88E-01 | 5,66E-01 |
| <i>MED28</i>           | 1,04  | 2,88E-01 | 5,66E-01 |
| <i>WWC2</i>            | 1,04  | 2,88E-01 | 5,66E-01 |
| <i>AK125393</i>        | -1,08 | 2,88E-01 | 5,66E-01 |
| <i>FLJ20245</i>        | -1,06 | 2,88E-01 | 5,66E-01 |
| <i>TIMM9</i>           | -1,04 | 2,88E-01 | 5,66E-01 |
| <i>CD104030</i>        | 1,10  | 2,88E-01 | 5,66E-01 |
| <i>COPG</i>            | -1,07 | 2,89E-01 | 5,66E-01 |
| <i>SGPP2</i>           | -1,06 | 2,88E-01 | 5,66E-01 |
| <i>ENST00000216468</i> | -1,06 | 2,89E-01 | 5,66E-01 |
| <i>ULBP1</i>           | -1,05 | 2,89E-01 | 5,66E-01 |
| <i>POFUT2</i>          | -1,04 | 2,89E-01 | 5,66E-01 |
| <i>A_24_P41551</i>     | -1,04 | 2,89E-01 | 5,66E-01 |

|                 |       |          |          |
|-----------------|-------|----------|----------|
| ZBTB41          | -1,03 | 2,89E-01 | 5,66E-01 |
| LOC554247       | 1,04  | 2,89E-01 | 5,66E-01 |
| AA432215        | -1,03 | 2,89E-01 | 5,66E-01 |
| PRKCA           | -1,07 | 2,89E-01 | 5,66E-01 |
| C20orf161       | -1,05 | 2,89E-01 | 5,66E-01 |
| NBR1            | -1,05 | 2,89E-01 | 5,66E-01 |
| ENST00000240349 | -1,04 | 2,89E-01 | 5,66E-01 |
| KPNA6           | 1,05  | 2,89E-01 | 5,66E-01 |
| ENST00000361624 | 1,09  | 2,89E-01 | 5,66E-01 |
| RGS17           | -1,05 | 2,89E-01 | 5,67E-01 |
| GALNTL1         | 1,11  | 2,89E-01 | 5,67E-01 |
| RSC1A1          | 1,07  | 2,89E-01 | 5,67E-01 |
| THC2377907      | -1,03 | 2,89E-01 | 5,67E-01 |
| SFRS3           | 1,05  | 2,89E-01 | 5,67E-01 |
| A_23_P145596    | 1,05  | 2,89E-01 | 5,67E-01 |
| RNF19           | 1,05  | 2,89E-01 | 5,67E-01 |
| C17orf27        | 1,04  | 2,89E-01 | 5,67E-01 |
| PSMA6           | 1,04  | 2,89E-01 | 5,67E-01 |
| A_24_P910338    | 1,03  | 2,89E-01 | 5,67E-01 |
| AJ001827        | -1,05 | 2,90E-01 | 5,67E-01 |
| THC2428320      | 1,05  | 2,90E-01 | 5,67E-01 |
| APRIN           | -1,05 | 2,90E-01 | 5,67E-01 |
| AK025430        | 1,04  | 2,90E-01 | 5,68E-01 |
| TMOD4           | -1,08 | 2,90E-01 | 5,68E-01 |
| A_32_P201785    | -1,05 | 2,90E-01 | 5,68E-01 |
| ZNF560          | -1,04 | 2,90E-01 | 5,68E-01 |
| ENST00000381391 | 1,05  | 2,90E-01 | 5,68E-01 |
| NAPSA           | -1,04 | 2,90E-01 | 5,68E-01 |
| GPR150          | 1,05  | 2,90E-01 | 5,68E-01 |
| GOLGA           | -1,03 | 2,90E-01 | 5,68E-01 |
| ALPI            | 1,03  | 2,90E-01 | 5,68E-01 |
| C3orf14         | 1,07  | 2,90E-01 | 5,68E-01 |
| SSBP4           | -1,04 | 2,90E-01 | 5,68E-01 |
| ENST00000381298 | 1,04  | 2,90E-01 | 5,68E-01 |
| AI369133        | 1,03  | 2,90E-01 | 5,68E-01 |
| BC089454        | -1,05 | 2,90E-01 | 5,68E-01 |
| LOC147975       | -1,05 | 2,90E-01 | 5,68E-01 |
| KCNA2           | 1,04  | 2,90E-01 | 5,68E-01 |
| SPINK7          | -1,10 | 2,90E-01 | 5,68E-01 |
| PCDHGB3         | -1,04 | 2,90E-01 | 5,68E-01 |
| OLAH            | 1,07  | 2,90E-01 | 5,68E-01 |
| NOSIP           | 1,03  | 2,91E-01 | 5,68E-01 |
| LOC285429       | 1,04  | 2,91E-01 | 5,68E-01 |
| GLI4            | -1,03 | 2,91E-01 | 5,68E-01 |

|                        |       |          |          |
|------------------------|-------|----------|----------|
| <i>LOC400566</i>       | -1,14 | 2,91E-01 | 5,69E-01 |
| <i>TRIM28</i>          | -1,05 | 2,91E-01 | 5,69E-01 |
| <i>A_32_P208370</i>    | 1,03  | 2,91E-01 | 5,69E-01 |
| <i>BTG4</i>            | -1,04 | 2,91E-01 | 5,69E-01 |
| <i>AF090940</i>        | -1,09 | 2,91E-01 | 5,69E-01 |
| <i>GCG</i>             | 1,03  | 2,91E-01 | 5,69E-01 |
| <i>A_24_P767699</i>    | 1,04  | 2,91E-01 | 5,69E-01 |
| <i>CR604826</i>        | 1,05  | 2,91E-01 | 5,69E-01 |
| <i>AI015723</i>        | 1,04  | 2,91E-01 | 5,69E-01 |
| <i>RUFY3</i>           | -1,03 | 2,91E-01 | 5,69E-01 |
| <i>ENST00000372922</i> | -1,09 | 2,91E-01 | 5,69E-01 |
| <i>A_24_P919605</i>    | -1,04 | 2,91E-01 | 5,69E-01 |
| <i>HCG22</i>           | -1,04 | 2,91E-01 | 5,69E-01 |
| <i>BF246504</i>        | 1,04  | 2,91E-01 | 5,69E-01 |
| <i>TECTB</i>           | 1,04  | 2,91E-01 | 5,69E-01 |
| <i>MAGEA1</i>          | 1,06  | 2,91E-01 | 5,69E-01 |
| <i>PCBP3</i>           | -1,06 | 2,91E-01 | 5,69E-01 |
| <i>CIR</i>             | -1,04 | 2,91E-01 | 5,69E-01 |
| <i>GTF2IRD1</i>        | -1,05 | 2,91E-01 | 5,69E-01 |
| <i>MNT</i>             | -1,04 | 2,91E-01 | 5,69E-01 |
| <i>MMD</i>             | 1,06  | 2,91E-01 | 5,69E-01 |
| <i>UNQ6125</i>         | -1,05 | 2,91E-01 | 5,69E-01 |
| <i>TEX13A</i>          | 1,04  | 2,91E-01 | 5,69E-01 |
| <i>HSPB9</i>           | -1,07 | 2,92E-01 | 5,69E-01 |
| <i>ENST00000371388</i> | -1,05 | 2,92E-01 | 5,69E-01 |
| <i>TMEM138</i>         | -1,04 | 2,92E-01 | 5,69E-01 |
| <i>AI682237</i>        | 1,04  | 2,92E-01 | 5,69E-01 |
| <i>T12588</i>          | 1,07  | 2,92E-01 | 5,69E-01 |
| <i>DYNC1L12</i>        | 1,04  | 2,92E-01 | 5,70E-01 |
| <i>CD688871</i>        | 1,06  | 2,92E-01 | 5,70E-01 |
| <i>A_24_P929126</i>    | 1,03  | 2,92E-01 | 5,70E-01 |
| <i>AK094799</i>        | -1,06 | 2,92E-01 | 5,70E-01 |
| <i>AK055676</i>        | -1,05 | 2,92E-01 | 5,70E-01 |
| <i>ENST00000319246</i> | -1,05 | 2,92E-01 | 5,70E-01 |
| <i>SLC23A3</i>         | -1,05 | 2,92E-01 | 5,70E-01 |
| <i>ABCC12</i>          | -1,03 | 2,92E-01 | 5,70E-01 |
| <i>A_24_P934653</i>    | 1,04  | 2,92E-01 | 5,70E-01 |
| <i>ATN1</i>            | 1,04  | 2,92E-01 | 5,70E-01 |
| <i>AIPL1</i>           | 1,04  | 2,92E-01 | 5,70E-01 |
| <i>ISGF3G</i>          | -1,04 | 2,92E-01 | 5,70E-01 |
| <i>HSPC111</i>         | 1,07  | 2,92E-01 | 5,70E-01 |
| <i>IL19</i>            | -1,06 | 2,92E-01 | 5,70E-01 |
| <i>ZNF660</i>          | -1,06 | 2,92E-01 | 5,70E-01 |
| <i>THC2279735</i>      | 1,22  | 2,92E-01 | 5,70E-01 |

|                        |       |          |          |
|------------------------|-------|----------|----------|
| <i>C1orf51</i>         | -1,14 | 2,92E-01 | 5,70E-01 |
| <i>C1orf75</i>         | -1,04 | 2,92E-01 | 5,70E-01 |
| <i>SLC30A1</i>         | 1,04  | 2,92E-01 | 5,70E-01 |
| <i>ARPP-21</i>         | 1,05  | 2,92E-01 | 5,70E-01 |
| <i>BHLHB4</i>          | 1,07  | 2,92E-01 | 5,70E-01 |
| <i>AK092791</i>        | 1,08  | 2,92E-01 | 5,70E-01 |
| <i>THC2279352</i>      | -1,07 | 2,93E-01 | 5,70E-01 |
| <i>MTMR1</i>           | -1,03 | 2,93E-01 | 5,70E-01 |
| <i>HAP1</i>            | 1,03  | 2,93E-01 | 5,70E-01 |
| <i>CRP</i>             | 1,03  | 2,92E-01 | 5,70E-01 |
| <i>ENST00000305119</i> | 1,04  | 2,93E-01 | 5,70E-01 |
| <i>A_24_P934497</i>    | 1,04  | 2,93E-01 | 5,70E-01 |
| <i>PDE4D</i>           | 1,11  | 2,93E-01 | 5,70E-01 |
| <i>LOC390760</i>       | -1,04 | 2,93E-01 | 5,70E-01 |
| <i>A_24_P547659</i>    | 1,04  | 2,93E-01 | 5,70E-01 |
| <i>LTBP2</i>           | -1,15 | 2,93E-01 | 5,70E-01 |
| <i>AL601841</i>        | -1,04 | 2,93E-01 | 5,70E-01 |
| <i>CD52</i>            | -1,11 | 2,93E-01 | 5,70E-01 |
| <i>MBL1P1</i>          | -1,10 | 2,93E-01 | 5,70E-01 |
| <i>MANEA</i>           | -1,04 | 2,93E-01 | 5,70E-01 |
| <i>C12orf38</i>        | -1,04 | 2,93E-01 | 5,70E-01 |
| <i>WBP1</i>            | -1,03 | 2,93E-01 | 5,70E-01 |
| <i>PPHLN1</i>          | 1,03  | 2,93E-01 | 5,70E-01 |
| <i>CHRNA9</i>          | 1,04  | 2,93E-01 | 5,70E-01 |
| <i>KRTAP15-1</i>       | 1,05  | 2,93E-01 | 5,70E-01 |
| <i>LOC554234</i>       | 1,06  | 2,93E-01 | 5,70E-01 |
| <i>CD276</i>           | 1,07  | 2,93E-01 | 5,70E-01 |
| <i>SLC2A4</i>          | 1,11  | 2,93E-01 | 5,70E-01 |
| <i>PPP1R1B</i>         | 1,18  | 2,93E-01 | 5,70E-01 |
| <i>THC2340367</i>      | -1,05 | 2,93E-01 | 5,71E-01 |
| <i>RABEP1</i>          | 1,04  | 2,93E-01 | 5,71E-01 |
| <i>RPS6KA5</i>         | -1,11 | 2,93E-01 | 5,71E-01 |
| <i>TEGT</i>            | -1,03 | 2,93E-01 | 5,71E-01 |
| <i>HOXC6</i>           | 1,04  | 2,93E-01 | 5,71E-01 |
| <i>FAM3C</i>           | -1,04 | 2,93E-01 | 5,71E-01 |
| <i>THC2422324</i>      | -1,09 | 2,93E-01 | 5,71E-01 |
| <i>ENST00000368918</i> | -1,06 | 2,93E-01 | 5,71E-01 |
| <i>TDP1</i>            | -1,04 | 2,93E-01 | 5,71E-01 |
| <i>ALS2CR7</i>         | -1,04 | 2,93E-01 | 5,71E-01 |
| <i>BQ932036</i>        | 1,04  | 2,93E-01 | 5,71E-01 |
| <i>MGMT</i>            | 1,05  | 2,93E-01 | 5,71E-01 |
| <i>BC034817</i>        | -1,04 | 2,93E-01 | 5,71E-01 |
| <i>HIST1H1T</i>        | -1,04 | 2,93E-01 | 5,71E-01 |
| <i>PC</i>              | -1,10 | 2,94E-01 | 5,71E-01 |

|                        |       |          |          |
|------------------------|-------|----------|----------|
| <i>A_24_P929974</i>    | -1,04 | 2,94E-01 | 5,71E-01 |
| <i>INPP5B</i>          | -1,03 | 2,94E-01 | 5,71E-01 |
| <i>A_32_P147797</i>    | -1,04 | 2,94E-01 | 5,71E-01 |
| <i>TTY13</i>           | 1,03  | 2,94E-01 | 5,71E-01 |
| <i>BF734670</i>        | -1,04 | 2,94E-01 | 5,71E-01 |
| <i>AI291464</i>        | 1,07  | 2,94E-01 | 5,71E-01 |
| <i>LLGL1</i>           | -1,03 | 2,94E-01 | 5,71E-01 |
| <i>EAF2</i>            | -1,06 | 2,94E-01 | 5,72E-01 |
| <i>C6orf201</i>        | 1,03  | 2,94E-01 | 5,72E-01 |
| <i>AW572204</i>        | 1,04  | 2,94E-01 | 5,72E-01 |
| <i>UEVLD</i>           | 1,04  | 2,94E-01 | 5,72E-01 |
| <i>HECTD2</i>          | -1,06 | 2,94E-01 | 5,72E-01 |
| <i>AK094154</i>        | 1,04  | 2,94E-01 | 5,72E-01 |
| <i>DNASE1L3</i>        | -1,13 | 2,94E-01 | 5,72E-01 |
| <i>TMCC1</i>           | -1,04 | 2,94E-01 | 5,72E-01 |
| <i>TTYH2</i>           | 1,05  | 2,94E-01 | 5,72E-01 |
| <i>ENST00000334503</i> | 1,03  | 2,94E-01 | 5,72E-01 |
| <i>AK125302</i>        | 1,07  | 2,94E-01 | 5,72E-01 |
| <i>BI029121</i>        | 1,08  | 2,94E-01 | 5,72E-01 |
| <i>DECR2</i>           | -1,06 | 2,94E-01 | 5,72E-01 |
| <i>SEZ6L</i>           | -1,04 | 2,94E-01 | 5,72E-01 |
| <i>THC2443654</i>      | -1,05 | 2,94E-01 | 5,72E-01 |
| <i>THC2349560</i>      | 1,03  | 2,94E-01 | 5,72E-01 |
| <i>HIST1H2AM</i>       | 1,06  | 2,94E-01 | 5,72E-01 |
| <i>M32220</i>          | -1,10 | 2,95E-01 | 5,72E-01 |
| <i>SPP1</i>            | 1,46  | 2,95E-01 | 5,72E-01 |
| <i>ENST00000223210</i> | 1,03  | 2,95E-01 | 5,72E-01 |
| <i>NOB1</i>            | -1,05 | 2,95E-01 | 5,72E-01 |
| <i>A_23_P414771</i>    | 1,07  | 2,95E-01 | 5,72E-01 |
| <i>AF075028</i>        | -1,04 | 2,95E-01 | 5,72E-01 |
| <i>AF334590</i>        | 1,03  | 2,95E-01 | 5,72E-01 |
| <i>KIAA0703</i>        | -1,06 | 2,95E-01 | 5,72E-01 |
| <i>KRTAP5-5</i>        | 1,03  | 2,95E-01 | 5,72E-01 |
| <i>A_24_P474188</i>    | 1,08  | 2,95E-01 | 5,72E-01 |
| <i>CYP3A43</i>         | 1,03  | 2,95E-01 | 5,72E-01 |
| <i>BF887921</i>        | 1,04  | 2,95E-01 | 5,72E-01 |
| <i>A_24_P924783</i>    | 1,04  | 2,95E-01 | 5,72E-01 |
| <i>AB016902</i>        | 1,04  | 2,95E-01 | 5,73E-01 |
| <i>GNL3L</i>           | -1,03 | 2,95E-01 | 5,73E-01 |
| <i>C20orf67</i>        | 1,03  | 2,95E-01 | 5,73E-01 |
| <i>A_24_P340886</i>    | -1,04 | 2,95E-01 | 5,73E-01 |
| <i>CCT7</i>            | -1,04 | 2,95E-01 | 5,73E-01 |
| <i>ENST00000354668</i> | 1,03  | 2,95E-01 | 5,73E-01 |
| <i>KDELR1</i>          | -1,04 | 2,95E-01 | 5,73E-01 |

|                        |       |          |          |
|------------------------|-------|----------|----------|
| <i>AF083117</i>        | -1,04 | 2,95E-01 | 5,73E-01 |
| <i>ABCC2</i>           | -1,06 | 2,95E-01 | 5,73E-01 |
| <i>RAB4A</i>           | 1,04  | 2,95E-01 | 5,73E-01 |
| <i>PTPRG</i>           | 1,06  | 2,95E-01 | 5,73E-01 |
| <i>MMP17</i>           | 1,06  | 2,95E-01 | 5,73E-01 |
| <i>A_24_P934096</i>    | -1,06 | 2,95E-01 | 5,73E-01 |
| <i>TMEM15</i>          | -1,03 | 2,95E-01 | 5,73E-01 |
| <i>C20orf23</i>        | 1,04  | 2,95E-01 | 5,73E-01 |
| <i>PLCH2</i>           | 1,05  | 2,95E-01 | 5,73E-01 |
| <i>RBM14</i>           | -1,05 | 2,96E-01 | 5,73E-01 |
| <i>LOC286467</i>       | -1,05 | 2,96E-01 | 5,73E-01 |
| <i>RAB6C</i>           | 1,04  | 2,95E-01 | 5,73E-01 |
| <i>NMT2</i>            | -1,03 | 2,96E-01 | 5,73E-01 |
| <i>AP3B2</i>           | -1,06 | 2,96E-01 | 5,73E-01 |
| <i>PRAC</i>            | -1,06 | 2,96E-01 | 5,73E-01 |
| <i>WNT1</i>            | -1,06 | 2,96E-01 | 5,73E-01 |
| <i>ENST00000237840</i> | -1,04 | 2,96E-01 | 5,73E-01 |
| <i>TNRC5</i>           | -1,03 | 2,96E-01 | 5,73E-01 |
| <i>LOC642853</i>       | -1,06 | 2,96E-01 | 5,73E-01 |
| <i>AI051572</i>        | 1,04  | 2,96E-01 | 5,73E-01 |
| <i>ABHD12</i>          | 1,06  | 2,96E-01 | 5,73E-01 |
| <i>GUCA2A</i>          | 1,04  | 2,96E-01 | 5,73E-01 |
| <i>C21orf87</i>        | 1,04  | 2,96E-01 | 5,73E-01 |
| <i>ZNF581</i>          | -1,08 | 2,96E-01 | 5,73E-01 |
| <i>A_32_P64004</i>     | -1,15 | 2,96E-01 | 5,74E-01 |
| <i>AI076273</i>        | -1,05 | 2,96E-01 | 5,74E-01 |
| <i>TTY7</i>            | -1,04 | 2,96E-01 | 5,74E-01 |
| <i>LYK5</i>            | -1,03 | 2,96E-01 | 5,74E-01 |
| <i>ENST00000377116</i> | 1,07  | 2,96E-01 | 5,74E-01 |
| <i>THC2312512</i>      | -1,04 | 2,96E-01 | 5,74E-01 |
| <i>DNAJC11</i>         | 1,03  | 2,96E-01 | 5,74E-01 |
| <i>TYSND1</i>          | -1,04 | 2,96E-01 | 5,74E-01 |
| <i>KIAA0828</i>        | -1,04 | 2,96E-01 | 5,74E-01 |
| <i>PTCH</i>            | 1,04  | 2,96E-01 | 5,74E-01 |
| <i>A_24_P923900</i>    | 1,05  | 2,97E-01 | 5,74E-01 |
| <i>CD709370</i>        | -1,18 | 2,97E-01 | 5,74E-01 |
| <i>RAB36</i>           | -1,08 | 2,97E-01 | 5,74E-01 |
| <i>AF035790</i>        | -1,19 | 2,97E-01 | 5,74E-01 |
| <i>LOC643277</i>       | 1,04  | 2,97E-01 | 5,74E-01 |
| <i>NP109438</i>        | 1,05  | 2,97E-01 | 5,74E-01 |
| <i>BU681613</i>        | -1,04 | 2,97E-01 | 5,74E-01 |
| <i>BC033829</i>        | 1,12  | 2,97E-01 | 5,74E-01 |
| <i>C11orf36</i>        | 1,04  | 2,97E-01 | 5,74E-01 |
| <i>AU185665</i>        | 1,05  | 2,97E-01 | 5,75E-01 |

|                 |       |          |          |
|-----------------|-------|----------|----------|
| AL578110        | 1,06  | 2,97E-01 | 5,75E-01 |
| FBXL22          | -1,17 | 2,97E-01 | 5,75E-01 |
| IL17RE          | 1,05  | 2,97E-01 | 5,75E-01 |
| LOC389286       | -1,07 | 2,97E-01 | 5,75E-01 |
| AK057088        | -1,04 | 2,97E-01 | 5,75E-01 |
| CASK            | 1,06  | 2,97E-01 | 5,75E-01 |
| PCCB            | 1,05  | 2,97E-01 | 5,75E-01 |
| A_24_P401521    | -1,05 | 2,97E-01 | 5,75E-01 |
| GFOD1           | 1,08  | 2,97E-01 | 5,75E-01 |
| A_32_P448975    | -1,03 | 2,97E-01 | 5,75E-01 |
| BF373880        | 1,04  | 2,97E-01 | 5,75E-01 |
| IFI44L          | -1,16 | 2,98E-01 | 5,75E-01 |
| A_24_P928920    | -1,04 | 2,97E-01 | 5,75E-01 |
| THC2243803      | -1,05 | 2,98E-01 | 5,75E-01 |
| U87229          | 1,03  | 2,98E-01 | 5,75E-01 |
| TMPRSS11D       | -1,28 | 2,98E-01 | 5,75E-01 |
| AK057318        | -1,03 | 2,98E-01 | 5,75E-01 |
| GNAS            | -1,03 | 2,98E-01 | 5,75E-01 |
| ENST00000340034 | 1,07  | 2,98E-01 | 5,75E-01 |
| THC2341034      | 1,04  | 2,98E-01 | 5,75E-01 |
| BC010635        | 1,06  | 2,98E-01 | 5,75E-01 |
| THC2280895      | -1,07 | 2,98E-01 | 5,75E-01 |
| KIAA0317        | -1,05 | 2,98E-01 | 5,75E-01 |
| MGC33584        | -1,05 | 2,98E-01 | 5,75E-01 |
| A_24_P921069    | -1,04 | 2,98E-01 | 5,75E-01 |
| CORT            | -1,03 | 2,98E-01 | 5,75E-01 |
| A_24_P724807    | 1,03  | 2,98E-01 | 5,75E-01 |
| BM998048        | 1,04  | 2,98E-01 | 5,75E-01 |
| SLIT1           | 1,04  | 2,98E-01 | 5,75E-01 |
| BF978194        | 1,05  | 2,98E-01 | 5,75E-01 |
| AF130114        | 1,05  | 2,98E-01 | 5,75E-01 |
| AQP8            | 1,05  | 2,98E-01 | 5,75E-01 |
| PHCA            | -1,09 | 2,98E-01 | 5,76E-01 |
| THC2351376      | -1,04 | 2,98E-01 | 5,76E-01 |
| THC2394706      | -1,04 | 2,98E-01 | 5,76E-01 |
| FLJ25328        | -1,04 | 2,98E-01 | 5,76E-01 |
| TAL1            | -1,04 | 2,98E-01 | 5,76E-01 |
| FLJ36166        | -1,04 | 2,98E-01 | 5,76E-01 |
| THC2337268      | -1,06 | 2,98E-01 | 5,76E-01 |
| THC2442931      | 1,03  | 2,98E-01 | 5,76E-01 |
| A_24_P264597    | 1,06  | 2,98E-01 | 5,76E-01 |
| A_32_P124521    | -1,05 | 2,98E-01 | 5,76E-01 |
| CD5             | -1,04 | 2,98E-01 | 5,76E-01 |
| THC2445319      | 1,08  | 2,98E-01 | 5,76E-01 |

|                        |       |          |          |
|------------------------|-------|----------|----------|
| <i>A_24_P341106</i>    | -1,04 | 2,98E-01 | 5,76E-01 |
| <i>A_24_P938357</i>    | -1,04 | 2,98E-01 | 5,76E-01 |
| <i>PPP1R13L</i>        | 1,09  | 2,98E-01 | 5,76E-01 |
| <i>NALP7</i>           | -1,05 | 2,99E-01 | 5,76E-01 |
| <i>PCDHAC1</i>         | -1,04 | 2,99E-01 | 5,76E-01 |
| <i>A_24_P827794</i>    | 1,04  | 2,99E-01 | 5,76E-01 |
| <i>CRISP2</i>          | -1,10 | 2,99E-01 | 5,76E-01 |
| <i>THC2337763</i>      | -1,38 | 2,99E-01 | 5,76E-01 |
| <i>AK091028</i>        | -1,07 | 2,99E-01 | 5,76E-01 |
| <i>TRIM6</i>           | -1,06 | 2,99E-01 | 5,76E-01 |
| <i>A_24_P238996</i>    | -1,05 | 2,99E-01 | 5,76E-01 |
| <i>FLJ90709</i>        | -1,04 | 2,99E-01 | 5,76E-01 |
| <i>C21orf84</i>        | -1,04 | 2,99E-01 | 5,76E-01 |
| <i>PPP2R5D</i>         | -1,03 | 2,99E-01 | 5,76E-01 |
| <i>THC2373555</i>      | 1,04  | 2,99E-01 | 5,76E-01 |
| <i>PCGF2</i>           | 1,04  | 2,99E-01 | 5,76E-01 |
| <i>LOC439951</i>       | 1,07  | 2,99E-01 | 5,76E-01 |
| <i>ATP1B2</i>          | 1,08  | 2,99E-01 | 5,76E-01 |
| <i>CCDC77</i>          | -1,05 | 2,99E-01 | 5,76E-01 |
| <i>BFAR</i>            | -1,03 | 2,99E-01 | 5,76E-01 |
| <i>SPTLC1</i>          | -1,05 | 2,99E-01 | 5,76E-01 |
| <i>SORBS3</i>          | 1,05  | 2,99E-01 | 5,77E-01 |
| <i>HOXB4</i>           | 1,05  | 2,99E-01 | 5,77E-01 |
| <i>MGC39715</i>        | 1,05  | 2,99E-01 | 5,77E-01 |
| <i>A_32_P26536</i>     | 1,07  | 2,99E-01 | 5,77E-01 |
| <i>LOC651721</i>       | -1,13 | 2,99E-01 | 5,77E-01 |
| <i>PRDM15</i>          | -1,03 | 2,99E-01 | 5,77E-01 |
| <i>FBXO39</i>          | 1,06  | 2,99E-01 | 5,77E-01 |
| <i>THC2325989</i>      | 1,05  | 2,99E-01 | 5,77E-01 |
| <i>EPS8L2</i>          | -1,06 | 2,99E-01 | 5,77E-01 |
| <i>FAM45A</i>          | -1,05 | 2,99E-01 | 5,77E-01 |
| <i>AW276186</i>        | 1,03  | 2,99E-01 | 5,77E-01 |
| <i>FAM71B</i>          | 1,03  | 3,00E-01 | 5,77E-01 |
| <i>KIAA1718</i>        | -1,10 | 3,00E-01 | 5,77E-01 |
| <i>ENST00000341591</i> | -1,07 | 3,00E-01 | 5,77E-01 |
| <i>POM121</i>          | -1,03 | 3,00E-01 | 5,77E-01 |
| <i>THC2315557</i>      | 1,05  | 3,00E-01 | 5,77E-01 |
| <i>BE379389</i>        | 1,06  | 3,00E-01 | 5,77E-01 |
| <i>FLJ14213</i>        | -1,10 | 3,00E-01 | 5,77E-01 |
| <i>DNM1</i>            | -1,07 | 3,00E-01 | 5,77E-01 |
| <i>C9orf97</i>         | -1,04 | 3,00E-01 | 5,77E-01 |
| <i>MTCH2</i>           | 1,06  | 3,00E-01 | 5,77E-01 |
| <i>LOC653801</i>       | 1,07  | 3,00E-01 | 5,77E-01 |
| <i>A_32_P46112</i>     | -1,05 | 3,00E-01 | 5,77E-01 |



|                        |       |          |          |
|------------------------|-------|----------|----------|
| <i>FLJ14668</i>        | -1,04 | 3,00E-01 | 5,77E-01 |
| <i>LRCH1</i>           | -1,05 | 3,00E-01 | 5,78E-01 |
| <i>ITGAE</i>           | -1,05 | 3,00E-01 | 5,78E-01 |
| <i>UBE2D2</i>          | 1,03  | 3,00E-01 | 5,78E-01 |
| <i>THC2373399</i>      | 1,04  | 3,00E-01 | 5,78E-01 |
| <i>ECHS1</i>           | -1,05 | 3,00E-01 | 5,78E-01 |
| <i>ASF1B</i>           | -1,05 | 3,00E-01 | 5,78E-01 |
| <i>MRPL11</i>          | 1,03  | 3,00E-01 | 5,78E-01 |
| <i>DCI</i>             | 1,04  | 3,00E-01 | 5,78E-01 |
| <i>NOG</i>             | -1,11 | 3,01E-01 | 5,78E-01 |
| <i>HIST1H1D</i>        | -1,10 | 3,01E-01 | 5,78E-01 |
| <i>Magmas</i>          | -1,06 | 3,01E-01 | 5,78E-01 |
| <i>THC2383841</i>      | -1,06 | 3,01E-01 | 5,78E-01 |
| <i>GPR132</i>          | -1,04 | 3,01E-01 | 5,78E-01 |
| <i>GIP</i>             | -1,04 | 3,01E-01 | 5,78E-01 |
| <i>NARS2</i>           | -1,03 | 3,01E-01 | 5,78E-01 |
| <i>ENST00000221462</i> | -1,03 | 3,00E-01 | 5,78E-01 |
| <i>NALP14</i>          | 1,04  | 3,01E-01 | 5,78E-01 |
| <i>C2orf27</i>         | 1,05  | 3,01E-01 | 5,78E-01 |
| <i>A1BG</i>            | 1,10  | 3,01E-01 | 5,78E-01 |
| <i>BX100088</i>        | 1,11  | 3,01E-01 | 5,78E-01 |
| <i>ENST00000341249</i> | -1,04 | 3,01E-01 | 5,78E-01 |
| <i>A_32_P160388</i>    | 1,04  | 3,01E-01 | 5,78E-01 |
| <i>LOC401098</i>       | -1,03 | 3,01E-01 | 5,78E-01 |
| <i>UTS2R</i>           | 1,05  | 3,01E-01 | 5,78E-01 |
| <i>BC012528</i>        | -1,05 | 3,01E-01 | 5,78E-01 |
| <i>C11orf63</i>        | 1,05  | 3,01E-01 | 5,78E-01 |
| <i>KIAA1345</i>        | 1,04  | 3,01E-01 | 5,78E-01 |
| <i>GALE</i>            | 1,04  | 3,01E-01 | 5,78E-01 |
| <i>A_24_P350136</i>    | 1,05  | 3,01E-01 | 5,78E-01 |
| <i>THC2319743</i>      | -1,06 | 3,01E-01 | 5,78E-01 |
| <i>EFHA2</i>           | 1,06  | 3,01E-01 | 5,78E-01 |
| <i>A_32_P32789</i>     | 1,04  | 3,01E-01 | 5,78E-01 |
| <i>A_24_P16090</i>     | 1,04  | 3,01E-01 | 5,78E-01 |
| <i>INTS10</i>          | -1,03 | 3,01E-01 | 5,78E-01 |
| <i>AY927536</i>        | 1,04  | 3,01E-01 | 5,78E-01 |
| <i>LOC136263</i>       | 1,05  | 3,01E-01 | 5,78E-01 |
| <i>AW576335</i>        | 1,04  | 3,01E-01 | 5,78E-01 |
| <i>SSH2</i>            | -1,07 | 3,01E-01 | 5,78E-01 |
| <i>CCDC32</i>          | -1,05 | 3,01E-01 | 5,78E-01 |
| <i>A_24_P916759</i>    | -1,05 | 3,01E-01 | 5,78E-01 |
| <i>ENST00000340003</i> | -1,03 | 3,01E-01 | 5,78E-01 |
| <i>ENST00000354854</i> | 1,05  | 3,01E-01 | 5,78E-01 |
| <i>GATAD2B</i>         | -1,05 | 3,01E-01 | 5,79E-01 |

|                        |       |          |          |
|------------------------|-------|----------|----------|
| <i>THC2439361</i>      | 1,08  | 3,02E-01 | 5,79E-01 |
| <i>RNGTT</i>           | -1,05 | 3,02E-01 | 5,79E-01 |
| <i>STAT6</i>           | -1,07 | 3,02E-01 | 5,79E-01 |
| <i>THC2377221</i>      | -1,05 | 3,02E-01 | 5,79E-01 |
| <i>SYCP1</i>           | 1,03  | 3,02E-01 | 5,79E-01 |
| <i>OAZ2</i>            | 1,03  | 3,02E-01 | 5,79E-01 |
| <i>THC2408099</i>      | -1,08 | 3,02E-01 | 5,79E-01 |
| <i>ENST00000322370</i> | -1,03 | 3,02E-01 | 5,79E-01 |
| <i>ACAT1</i>           | 1,04  | 3,02E-01 | 5,79E-01 |
| <i>HSPB2</i>           | 1,05  | 3,02E-01 | 5,79E-01 |
| <i>AW188034</i>        | 1,06  | 3,02E-01 | 5,79E-01 |
| <i>AK057015</i>        | -1,05 | 3,02E-01 | 5,79E-01 |
| <i>FBXL12</i>          | -1,04 | 3,02E-01 | 5,79E-01 |
| <i>RASA1</i>           | -1,03 | 3,02E-01 | 5,79E-01 |
| <i>A_24_P934740</i>    | 1,04  | 3,02E-01 | 5,79E-01 |
| <i>NAP5</i>            | 1,09  | 3,02E-01 | 5,79E-01 |
| <i>SSTR1</i>           | 1,14  | 3,02E-01 | 5,79E-01 |
| <i>AI796347</i>        | 1,04  | 3,02E-01 | 5,79E-01 |
| <i>A_24_P41250</i>     | -1,03 | 3,02E-01 | 5,79E-01 |
| <i>GABRA6</i>          | -1,03 | 3,02E-01 | 5,79E-01 |
| <i>C2orf16</i>         | 1,04  | 3,02E-01 | 5,79E-01 |
| <i>A_23_P158699</i>    | -1,06 | 3,02E-01 | 5,79E-01 |
| <i>POLE4</i>           | -1,04 | 3,02E-01 | 5,79E-01 |
| <i>KREMEN2</i>         | 1,05  | 3,02E-01 | 5,79E-01 |
| <i>A_24_P935114</i>    | -1,03 | 3,03E-01 | 5,80E-01 |
| <i>ALOX12P2</i>        | 1,03  | 3,03E-01 | 5,80E-01 |
| <i>ENST00000382817</i> | -1,03 | 3,03E-01 | 5,80E-01 |
| <i>MARK2</i>           | 1,03  | 3,03E-01 | 5,80E-01 |
| <i>THC2314224</i>      | -1,09 | 3,03E-01 | 5,80E-01 |
| <i>RPL3</i>            | -1,03 | 3,03E-01 | 5,80E-01 |
| <i>RPL26L1</i>         | 1,08  | 3,03E-01 | 5,80E-01 |
| <i>C20orf74</i>        | 1,08  | 3,03E-01 | 5,80E-01 |
| <i>OPRM1</i>           | 1,02  | 3,03E-01 | 5,80E-01 |
| <i>THC2254059</i>      | -1,04 | 3,03E-01 | 5,80E-01 |
| <i>MGC2749</i>         | 1,03  | 3,03E-01 | 5,80E-01 |
| <i>BQ292684</i>        | 1,04  | 3,03E-01 | 5,80E-01 |
| <i>ONECUT1</i>         | 1,05  | 3,03E-01 | 5,80E-01 |
| <i>PPA1</i>            | 1,05  | 3,03E-01 | 5,80E-01 |
| <i>IL23R</i>           | -1,04 | 3,03E-01 | 5,80E-01 |
| <i>A_32_P13081</i>     | 1,10  | 3,03E-01 | 5,80E-01 |
| <i>DKFZp434O0320</i>   | -1,04 | 3,03E-01 | 5,80E-01 |
| <i>MYPN</i>            | -1,03 | 3,03E-01 | 5,80E-01 |
| <i>AK126053</i>        | 1,04  | 3,03E-01 | 5,80E-01 |
| <i>BE700850</i>        | 1,04  | 3,03E-01 | 5,80E-01 |

|                        |       |          |          |
|------------------------|-------|----------|----------|
| <i>LOC90499</i>        | -1,08 | 3,03E-01 | 5,81E-01 |
| <i>XPNPEP1</i>         | -1,04 | 3,03E-01 | 5,81E-01 |
| <i>A_24_P153003</i>    | 1,05  | 3,03E-01 | 5,81E-01 |
| <i>A_24_P375340</i>    | 1,05  | 3,03E-01 | 5,81E-01 |
| <i>C17orf32</i>        | -1,03 | 3,04E-01 | 5,81E-01 |
| <i>BC030609</i>        | -1,04 | 3,04E-01 | 5,81E-01 |
| <i>ENST00000332750</i> | 1,04  | 3,04E-01 | 5,81E-01 |
| <i>PPP1R12C</i>        | 1,07  | 3,04E-01 | 5,81E-01 |
| <i>ABHD1</i>           | -1,04 | 3,04E-01 | 5,81E-01 |
| <i>A_24_P170147</i>    | -1,04 | 3,04E-01 | 5,81E-01 |
| <i>TUFM</i>            | 1,03  | 3,04E-01 | 5,81E-01 |
| <i>R96556</i>          | 1,05  | 3,04E-01 | 5,81E-01 |
| <i>AK094525</i>        | -1,06 | 3,04E-01 | 5,81E-01 |
| <i>RGN</i>             | 1,05  | 3,04E-01 | 5,81E-01 |
| <i>A_24_P408981</i>    | -1,06 | 3,04E-01 | 5,81E-01 |
| <i>LOC253264</i>       | -1,05 | 3,04E-01 | 5,81E-01 |
| <i>A_24_P930372</i>    | -1,04 | 3,04E-01 | 5,81E-01 |
| <i>ENTHD1</i>          | -1,03 | 3,04E-01 | 5,81E-01 |
| <i>AK129904</i>        | 1,04  | 3,04E-01 | 5,81E-01 |
| <i>GRIN2C</i>          | -1,07 | 3,04E-01 | 5,81E-01 |
| <i>RPL10L</i>          | -1,04 | 3,04E-01 | 5,81E-01 |
| <i>C1orf78</i>         | 1,05  | 3,04E-01 | 5,81E-01 |
| <i>LOC285733</i>       | 1,04  | 3,04E-01 | 5,82E-01 |
| <i>SLC17A8</i>         | 1,03  | 3,04E-01 | 5,82E-01 |
| <i>FHL3</i>            | -1,08 | 3,04E-01 | 5,82E-01 |
| <i>MAN1A2</i>          | 1,04  | 3,04E-01 | 5,82E-01 |
| <i>A_24_P66908</i>     | 1,07  | 3,04E-01 | 5,82E-01 |
| <i>AK023376</i>        | -1,06 | 3,05E-01 | 5,82E-01 |
| <i>CMTM3</i>           | -1,05 | 3,04E-01 | 5,82E-01 |
| <i>DNMT3A</i>          | -1,04 | 3,05E-01 | 5,82E-01 |
| <i>A_24_P945036</i>    | 1,03  | 3,04E-01 | 5,82E-01 |
| <i>C4B</i>             | 1,15  | 3,05E-01 | 5,82E-01 |
| <i>A_32_P18630</i>     | -1,06 | 3,05E-01 | 5,82E-01 |
| <i>A_32_P95502</i>     | -1,05 | 3,05E-01 | 5,82E-01 |
| <i>THC2355570</i>      | -1,06 | 3,05E-01 | 5,82E-01 |
| <i>UBE2R2</i>          | -1,05 | 3,05E-01 | 5,82E-01 |
| <i>NUCKS1</i>          | 1,03  | 3,05E-01 | 5,82E-01 |
| <i>NOL9</i>            | 1,03  | 3,05E-01 | 5,82E-01 |
| <i>MYCBP2</i>          | 1,05  | 3,05E-01 | 5,82E-01 |
| <i>BG292169</i>        | -1,06 | 3,05E-01 | 5,82E-01 |
| <i>VRK2</i>            | 1,04  | 3,05E-01 | 5,82E-01 |
| <i>ECM2</i>            | -1,07 | 3,05E-01 | 5,82E-01 |
| <i>EEF2</i>            | 1,06  | 3,05E-01 | 5,82E-01 |
| <i>IVNS1ABP</i>        | 1,06  | 3,05E-01 | 5,82E-01 |

|                     |       |          |          |
|---------------------|-------|----------|----------|
| <i>A_24_P944627</i> | 1,05  | 3,05E-01 | 5,82E-01 |
| <i>ALDH4A1</i>      | 1,07  | 3,05E-01 | 5,82E-01 |
| <i>UTS2D</i>        | 1,05  | 3,05E-01 | 5,82E-01 |
| <i>THC2302865</i>   | -1,04 | 3,05E-01 | 5,82E-01 |
| <i>INDOL1</i>       | -1,05 | 3,05E-01 | 5,83E-01 |
| <i>THC2419426</i>   | 1,05  | 3,05E-01 | 5,83E-01 |
| <i>AK096104</i>     | -1,04 | 3,05E-01 | 5,83E-01 |
| <i>TEX14</i>        | 1,04  | 3,05E-01 | 5,83E-01 |
| <i>LOC144097</i>    | -1,05 | 3,05E-01 | 5,83E-01 |
| <i>AK124402</i>     | -1,05 | 3,06E-01 | 5,83E-01 |
| <i>HNRPL</i>        | 1,04  | 3,06E-01 | 5,83E-01 |
| <i>SLC9A3R2</i>     | 1,09  | 3,06E-01 | 5,83E-01 |
| <i>CCDC89</i>       | -1,08 | 3,06E-01 | 5,83E-01 |
| <i>A_32_P205792</i> | -1,08 | 3,06E-01 | 5,83E-01 |
| <i>C8G</i>          | -1,03 | 3,06E-01 | 5,83E-01 |
| <i>AK098257</i>     | 1,04  | 3,06E-01 | 5,83E-01 |
| <i>FOXB1</i>        | 1,06  | 3,06E-01 | 5,83E-01 |
| <i>C16orf59</i>     | -1,05 | 3,06E-01 | 5,83E-01 |
| <i>A_24_P127063</i> | 1,09  | 3,06E-01 | 5,83E-01 |
| <i>WDR61</i>        | -1,05 | 3,06E-01 | 5,84E-01 |
| <i>COL9A2</i>       | 1,05  | 3,06E-01 | 5,84E-01 |
| <i>KCNJ15</i>       | 1,13  | 3,06E-01 | 5,84E-01 |
| <i>DIP2C</i>        | -1,05 | 3,06E-01 | 5,84E-01 |
| <i>CLCA4</i>        | -1,10 | 3,06E-01 | 5,84E-01 |
| <i>ZCCHC7</i>       | 1,07  | 3,06E-01 | 5,84E-01 |
| <i>AY358239</i>     | 1,04  | 3,07E-01 | 5,84E-01 |
| <i>SPATA1</i>       | -1,03 | 3,07E-01 | 5,84E-01 |
| <i>CCDC63</i>       | -1,03 | 3,07E-01 | 5,84E-01 |
| <i>LOC144438</i>    | -1,05 | 3,07E-01 | 5,84E-01 |
| <i>PPAPDC1A</i>     | -1,11 | 3,07E-01 | 5,85E-01 |
| <i>MYH1</i>         | -1,05 | 3,07E-01 | 5,85E-01 |
| <i>TUSC2</i>        | 1,04  | 3,07E-01 | 5,85E-01 |
| <i>A_24_P483096</i> | 1,05  | 3,07E-01 | 5,85E-01 |
| <i>ZNF676</i>       | -1,07 | 3,07E-01 | 5,85E-01 |
| <i>BICC1</i>        | -1,06 | 3,07E-01 | 5,85E-01 |
| <i>THC2286599</i>   | 1,06  | 3,07E-01 | 5,85E-01 |
| <i>PYCR1</i>        | -1,26 | 3,07E-01 | 5,85E-01 |
| <i>AK022357</i>     | -1,04 | 3,07E-01 | 5,85E-01 |
| <i>FLJ23588</i>     | -1,03 | 3,07E-01 | 5,85E-01 |
| <i>AK056686</i>     | 1,04  | 3,07E-01 | 5,85E-01 |
| <i>AW875618</i>     | 1,04  | 3,07E-01 | 5,85E-01 |
| <i>TWIST1</i>       | 1,08  | 3,07E-01 | 5,85E-01 |
| <i>P2RX3</i>        | 1,04  | 3,07E-01 | 5,85E-01 |
| <i>LGMN</i>         | 1,07  | 3,07E-01 | 5,85E-01 |

|                        |       |          |          |
|------------------------|-------|----------|----------|
| <i>LRRN1</i>           | -1,11 | 3,07E-01 | 5,85E-01 |
| <i>IL13RA1</i>         | 1,06  | 3,07E-01 | 5,85E-01 |
| <i>ADORA2B</i>         | 1,10  | 3,07E-01 | 5,85E-01 |
| <i>THC2316750</i>      | -1,11 | 3,07E-01 | 5,85E-01 |
| <i>DDB1</i>            | -1,04 | 3,07E-01 | 5,85E-01 |
| <i>FLJ35390</i>        | 1,12  | 3,08E-01 | 5,85E-01 |
| <i>AF038199</i>        | -1,05 | 3,08E-01 | 5,85E-01 |
| <i>BE502686</i>        | -1,04 | 3,08E-01 | 5,85E-01 |
| <i>ICAM3</i>           | -1,04 | 3,08E-01 | 5,85E-01 |
| <i>CDX1</i>            | -1,04 | 3,08E-01 | 5,85E-01 |
| <i>SF3A1</i>           | -1,03 | 3,08E-01 | 5,85E-01 |
| <i>A_24_P942312</i>    | 1,04  | 3,08E-01 | 5,85E-01 |
| <i>PCQAP</i>           | -1,03 | 3,08E-01 | 5,85E-01 |
| <i>CSAG2</i>           | -1,04 | 3,08E-01 | 5,85E-01 |
| <i>A_24_P204257</i>    | 1,04  | 3,08E-01 | 5,85E-01 |
| <i>THC2307373</i>      | -1,06 | 3,08E-01 | 5,85E-01 |
| <i>GTPBP6</i>          | 1,03  | 3,08E-01 | 5,85E-01 |
| <i>BC030102</i>        | -1,05 | 3,08E-01 | 5,85E-01 |
| <i>RC8</i>             | 1,02  | 3,08E-01 | 5,85E-01 |
| <i>EIF4E</i>           | 1,03  | 3,08E-01 | 5,85E-01 |
| <i>NGEF</i>            | -1,14 | 3,08E-01 | 5,85E-01 |
| <i>ZNF257</i>          | -1,08 | 3,08E-01 | 5,86E-01 |
| <i>MORF4L1</i>         | -1,04 | 3,08E-01 | 5,86E-01 |
| <i>MYNN</i>            | 1,04  | 3,08E-01 | 5,86E-01 |
| <i>ATP5J</i>           | 1,04  | 3,08E-01 | 5,86E-01 |
| <i>A_24_P919940</i>    | 1,04  | 3,08E-01 | 5,86E-01 |
| <i>SCEL</i>            | -1,33 | 3,08E-01 | 5,86E-01 |
| <i>PRKY</i>            | -1,07 | 3,08E-01 | 5,86E-01 |
| <i>A_24_P846738</i>    | 1,04  | 3,08E-01 | 5,86E-01 |
| <i>A_32_P131090</i>    | 1,04  | 3,08E-01 | 5,86E-01 |
| <i>TFCP2L1</i>         | -1,09 | 3,08E-01 | 5,86E-01 |
| <i>RP13-102H20.1</i>   | -1,08 | 3,08E-01 | 5,86E-01 |
| <i>AY358681</i>        | -1,06 | 3,08E-01 | 5,86E-01 |
| <i>A_32_P86365</i>     | 1,11  | 3,08E-01 | 5,86E-01 |
| <i>ENST00000273844</i> | -1,03 | 3,09E-01 | 5,86E-01 |
| <i>MRPS17</i>          | 1,04  | 3,08E-01 | 5,86E-01 |
| <i>F2RL3</i>           | 1,05  | 3,09E-01 | 5,86E-01 |
| <i>TMEM38B</i>         | 1,05  | 3,09E-01 | 5,86E-01 |
| <i>ENST00000381498</i> | -1,04 | 3,09E-01 | 5,86E-01 |
| <i>ENST00000376646</i> | -1,05 | 3,09E-01 | 5,86E-01 |
| <i>FALZ</i>            | -1,04 | 3,09E-01 | 5,86E-01 |
| <i>ICOSLG</i>          | 1,04  | 3,09E-01 | 5,86E-01 |
| <i>PARP14</i>          | 1,04  | 3,09E-01 | 5,86E-01 |
| <i>CR600419</i>        | 1,04  | 3,09E-01 | 5,86E-01 |

|                 |       |          |          |
|-----------------|-------|----------|----------|
| A_32_P121234    | 1,09  | 3,09E-01 | 5,86E-01 |
| TMEM86A         | -1,05 | 3,09E-01 | 5,86E-01 |
| A_32_P215856    | -1,04 | 3,09E-01 | 5,86E-01 |
| SIRT7           | -1,04 | 3,09E-01 | 5,86E-01 |
| ZNF41           | 1,04  | 3,09E-01 | 5,86E-01 |
| RP11-38023.2    | -1,03 | 3,09E-01 | 5,86E-01 |
| LOXL4           | -1,20 | 3,09E-01 | 5,86E-01 |
| THC2382717      | -1,05 | 3,09E-01 | 5,86E-01 |
| 15E1.2          | -1,04 | 3,09E-01 | 5,86E-01 |
| PRSS7           | -1,04 | 3,09E-01 | 5,86E-01 |
| A_24_P921862    | 1,04  | 3,09E-01 | 5,86E-01 |
| SYNPO           | 1,09  | 3,09E-01 | 5,86E-01 |
| FLJ30679        | 1,03  | 3,09E-01 | 5,87E-01 |
| CMTM5           | 1,08  | 3,09E-01 | 5,87E-01 |
| BM544548        | -1,05 | 3,09E-01 | 5,87E-01 |
| DPEP1           | -1,04 | 3,09E-01 | 5,87E-01 |
| FUT3            | -1,15 | 3,09E-01 | 5,87E-01 |
| AF130074        | 1,04  | 3,09E-01 | 5,87E-01 |
| AK057771        | 1,05  | 3,10E-01 | 5,87E-01 |
| GRN             | -1,06 | 3,10E-01 | 5,87E-01 |
| THC2408033      | -1,05 | 3,10E-01 | 5,87E-01 |
| NACAL           | -1,04 | 3,10E-01 | 5,87E-01 |
| BC034924        | -1,05 | 3,10E-01 | 5,87E-01 |
| ENPP6           | -1,11 | 3,10E-01 | 5,87E-01 |
| TEX12           | 1,04  | 3,10E-01 | 5,87E-01 |
| ZMYM3           | -1,04 | 3,10E-01 | 5,88E-01 |
| BC040064        | -1,04 | 3,10E-01 | 5,88E-01 |
| ETFDH           | 1,04  | 3,10E-01 | 5,88E-01 |
| LOC339344       | 1,06  | 3,10E-01 | 5,88E-01 |
| SH3RF2          | 1,07  | 3,10E-01 | 5,88E-01 |
| PACS1           | 1,04  | 3,10E-01 | 5,88E-01 |
| AK125361        | -1,09 | 3,10E-01 | 5,88E-01 |
| FAM106A         | -1,06 | 3,10E-01 | 5,88E-01 |
| TSPAN3          | -1,04 | 3,10E-01 | 5,88E-01 |
| LOC554203       | 1,04  | 3,10E-01 | 5,88E-01 |
| A_24_P255786    | 1,18  | 3,10E-01 | 5,88E-01 |
| AF086427        | -1,03 | 3,10E-01 | 5,88E-01 |
| ENST00000377515 | 1,03  | 3,10E-01 | 5,88E-01 |
| ENST00000312289 | -1,04 | 3,10E-01 | 5,88E-01 |
| KCNN3           | -1,15 | 3,11E-01 | 5,88E-01 |
| LOC133619       | -1,06 | 3,11E-01 | 5,88E-01 |
| A_32_P56726     | -1,04 | 3,11E-01 | 5,88E-01 |
| CP110           | -1,03 | 3,10E-01 | 5,88E-01 |
| A_32_P198601    | -1,03 | 3,10E-01 | 5,88E-01 |

|                        |       |          |          |
|------------------------|-------|----------|----------|
| <i>THC2314205</i>      | 1,07  | 3,11E-01 | 5,88E-01 |
| <i>ISL1</i>            | 1,08  | 3,10E-01 | 5,88E-01 |
| <i>PCYT1B</i>          | 1,05  | 3,11E-01 | 5,88E-01 |
| <i>PRPF31</i>          | -1,03 | 3,11E-01 | 5,88E-01 |
| <i>ENST00000303697</i> | -1,05 | 3,11E-01 | 5,88E-01 |
| <i>ENST00000376682</i> | -1,13 | 3,11E-01 | 5,88E-01 |
| <i>GP9</i>             | -1,06 | 3,11E-01 | 5,88E-01 |
| <i>STRA6</i>           | -1,07 | 3,11E-01 | 5,88E-01 |
| <i>AK074162</i>        | -1,04 | 3,11E-01 | 5,88E-01 |
| <i>A_32_P687</i>       | 1,05  | 3,11E-01 | 5,88E-01 |
| <i>KIAA0100</i>        | -1,03 | 3,11E-01 | 5,88E-01 |
| <i>WFS1</i>            | -1,07 | 3,11E-01 | 5,88E-01 |
| <i>RABAC1</i>          | -1,04 | 3,11E-01 | 5,88E-01 |
| <i>ZNF324</i>          | -1,04 | 3,11E-01 | 5,89E-01 |
| <i>A_32_P15328</i>     | 1,04  | 3,11E-01 | 5,89E-01 |
| <i>A_24_P533990</i>    | 1,07  | 3,11E-01 | 5,89E-01 |
| <i>C3orf24</i>         | 1,04  | 3,11E-01 | 5,89E-01 |
| <i>TIP39</i>           | 1,05  | 3,11E-01 | 5,89E-01 |
| <i>PDZD4</i>           | 1,07  | 3,11E-01 | 5,89E-01 |
| <i>A_24_P143785</i>    | 1,06  | 3,11E-01 | 5,89E-01 |
| <i>RPL21</i>           | -1,03 | 3,12E-01 | 5,89E-01 |
| <i>CCDC112</i>         | -1,03 | 3,12E-01 | 5,89E-01 |
| <i>AK024670</i>        | -1,05 | 3,12E-01 | 5,89E-01 |
| <i>AL080161</i>        | 1,03  | 3,12E-01 | 5,89E-01 |
| <i>LIMK2</i>           | -1,04 | 3,12E-01 | 5,89E-01 |
| <i>C9orf28</i>         | 1,03  | 3,12E-01 | 5,89E-01 |
| <i>UNQ2541</i>         | 1,03  | 3,12E-01 | 5,89E-01 |
| <i>MAFB</i>            | 1,09  | 3,12E-01 | 5,89E-01 |
| <i>ENST00000382343</i> | 1,04  | 3,12E-01 | 5,89E-01 |
| <i>TRA16</i>           | -1,04 | 3,12E-01 | 5,89E-01 |
| <i>THC2316492</i>      | 1,09  | 3,12E-01 | 5,90E-01 |
| <i>THC2361983</i>      | -1,03 | 3,12E-01 | 5,90E-01 |
| <i>AF130108</i>        | -1,04 | 3,12E-01 | 5,90E-01 |
| <i>SEZ6</i>            | 1,03  | 3,12E-01 | 5,90E-01 |
| <i>THC2432970</i>      | 1,04  | 3,12E-01 | 5,90E-01 |
| <i>THC2376423</i>      | -1,06 | 3,12E-01 | 5,90E-01 |
| <i>ENST00000371477</i> | -1,04 | 3,12E-01 | 5,90E-01 |
| <i>BF572267</i>        | 1,03  | 3,12E-01 | 5,90E-01 |
| <i>HOXC11</i>          | 1,06  | 3,12E-01 | 5,90E-01 |
| <i>ZNF552</i>          | -1,03 | 3,12E-01 | 5,90E-01 |
| <i>ZDHHC13</i>         | 1,04  | 3,12E-01 | 5,90E-01 |
| <i>SLC7A6</i>          | -1,03 | 3,12E-01 | 5,90E-01 |
| <i>DEFB125</i>         | 1,03  | 3,13E-01 | 5,90E-01 |
| <i>RGS7</i>            | 1,03  | 3,13E-01 | 5,90E-01 |

|                        |       |          |          |
|------------------------|-------|----------|----------|
| <i>CNOT1</i>           | -1,03 | 3,13E-01 | 5,90E-01 |
| <i>CDC91L1</i>         | -1,03 | 3,13E-01 | 5,90E-01 |
| <i>IL10RA</i>          | -1,08 | 3,13E-01 | 5,90E-01 |
| <i>RHAG</i>            | 1,06  | 3,13E-01 | 5,90E-01 |
| <i>CLEC3B</i>          | 1,10  | 3,13E-01 | 5,90E-01 |
| <i>FLJ11783</i>        | -1,07 | 3,13E-01 | 5,90E-01 |
| <i>ENST00000259289</i> | -1,04 | 3,13E-01 | 5,90E-01 |
| <i>SF4</i>             | -1,03 | 3,13E-01 | 5,91E-01 |
| <i>ACPT</i>            | 1,04  | 3,13E-01 | 5,91E-01 |
| <i>PTDSS1</i>          | 1,03  | 3,13E-01 | 5,91E-01 |
| <i>A_24_P802963</i>    | -1,04 | 3,13E-01 | 5,91E-01 |
| <i>ENST00000256861</i> | 1,11  | 3,13E-01 | 5,91E-01 |
| <i>BQ186660</i>        | -1,08 | 3,13E-01 | 5,91E-01 |
| <i>UBE2Q2</i>          | 1,03  | 3,13E-01 | 5,91E-01 |
| <i>MEF2D</i>           | 1,04  | 3,13E-01 | 5,91E-01 |
| <i>MAP3K15</i>         | -1,04 | 3,13E-01 | 5,91E-01 |
| <i>BX119880</i>        | -1,04 | 3,13E-01 | 5,91E-01 |
| <i>A_24_P460529</i>    | -1,03 | 3,13E-01 | 5,91E-01 |
| <i>C17orf39</i>        | 1,05  | 3,13E-01 | 5,91E-01 |
| <i>CA866957</i>        | 1,04  | 3,14E-01 | 5,91E-01 |
| <i>C9orf18</i>         | -1,35 | 3,14E-01 | 5,92E-01 |
| <i>ADAM7</i>           | -1,04 | 3,14E-01 | 5,92E-01 |
| <i>RBMY2FP</i>         | 1,04  | 3,14E-01 | 5,92E-01 |
| <i>AK125961</i>        | -1,08 | 3,14E-01 | 5,92E-01 |
| <i>FCN3</i>            | 1,05  | 3,14E-01 | 5,92E-01 |
| <i>ZNF358</i>          | 1,05  | 3,14E-01 | 5,92E-01 |
| <i>CAPN12</i>          | -1,05 | 3,14E-01 | 5,92E-01 |
| <i>CDRT15</i>          | 1,04  | 3,14E-01 | 5,92E-01 |
| <i>BC011779</i>        | -1,07 | 3,14E-01 | 5,92E-01 |
| <i>AF086527</i>        | -1,05 | 3,14E-01 | 5,92E-01 |
| <i>ENST00000373954</i> | -1,05 | 3,14E-01 | 5,92E-01 |
| <i>THC2338711</i>      | -1,05 | 3,14E-01 | 5,92E-01 |
| <i>A_24_P915433</i>    | -1,04 | 3,14E-01 | 5,92E-01 |
| <i>LOC648232</i>       | 1,04  | 3,14E-01 | 5,92E-01 |
| <i>ZNF621</i>          | 1,06  | 3,14E-01 | 5,92E-01 |
| <i>AK058169</i>        | 1,04  | 3,14E-01 | 5,92E-01 |
| <i>AL831999</i>        | -1,06 | 3,14E-01 | 5,92E-01 |
| <i>C14orf130</i>       | 1,03  | 3,14E-01 | 5,92E-01 |
| <i>AF116719</i>        | 1,04  | 3,14E-01 | 5,92E-01 |
| <i>UVRAG</i>           | 1,05  | 3,14E-01 | 5,92E-01 |
| <i>LOC120376</i>       | -1,11 | 3,14E-01 | 5,92E-01 |
| <i>HEXDC</i>           | -1,06 | 3,14E-01 | 5,92E-01 |
| <i>A_23_P5626</i>      | -1,04 | 3,14E-01 | 5,92E-01 |
| <i>BE926212</i>        | -1,09 | 3,15E-01 | 5,92E-01 |



|                        |       |          |          |
|------------------------|-------|----------|----------|
| <i>C9orf45</i>         | -1,04 | 3,14E-01 | 5,92E-01 |
| <i>PGC</i>             | 1,03  | 3,14E-01 | 5,92E-01 |
| <i>KIAA1432</i>        | -1,03 | 3,15E-01 | 5,92E-01 |
| <i>ENST00000249760</i> | -1,04 | 3,15E-01 | 5,92E-01 |
| <i>MAP2K4</i>          | -1,03 | 3,15E-01 | 5,92E-01 |
| <i>THC2450104</i>      | 1,04  | 3,15E-01 | 5,92E-01 |
| <i>CBL</i>             | 1,04  | 3,15E-01 | 5,92E-01 |
| <i>C12orf29</i>        | -1,03 | 3,15E-01 | 5,92E-01 |
| <i>WAC</i>             | 1,03  | 3,15E-01 | 5,92E-01 |
| <i>TMEM117</i>         | 1,04  | 3,15E-01 | 5,92E-01 |
| <i>PPP3R2</i>          | 1,03  | 3,15E-01 | 5,92E-01 |
| <i>KCNS3</i>           | 1,08  | 3,15E-01 | 5,92E-01 |
| <i>AL049443</i>        | -1,18 | 3,15E-01 | 5,93E-01 |
| <i>R3HDM1</i>          | -1,04 | 3,15E-01 | 5,93E-01 |
| <i>MVP</i>             | 1,04  | 3,15E-01 | 5,93E-01 |
| <i>MCF2L</i>           | 1,07  | 3,15E-01 | 5,93E-01 |
| <i>AK056283</i>        | -1,04 | 3,15E-01 | 5,93E-01 |
| <i>BC034593</i>        | 1,04  | 3,15E-01 | 5,93E-01 |
| <i>NEXN</i>            | 1,15  | 3,15E-01 | 5,93E-01 |
| <i>AK094481</i>        | -1,04 | 3,15E-01 | 5,93E-01 |
| <i>NSFL1C</i>          | 1,03  | 3,15E-01 | 5,93E-01 |
| <i>A_24_P878376</i>    | 1,04  | 3,15E-01 | 5,93E-01 |
| <i>AF116701</i>        | 1,04  | 3,15E-01 | 5,93E-01 |
| <i>MCM8</i>            | -1,04 | 3,15E-01 | 5,93E-01 |
| <i>AK090417</i>        | -1,04 | 3,15E-01 | 5,93E-01 |
| <i>CR609948</i>        | -1,06 | 3,16E-01 | 5,93E-01 |
| <i>RDX</i>             | -1,06 | 3,16E-01 | 5,93E-01 |
| <i>CAPN7</i>           | -1,04 | 3,16E-01 | 5,93E-01 |
| <i>RBM10</i>           | -1,04 | 3,16E-01 | 5,93E-01 |
| <i>AKT2</i>            | -1,03 | 3,16E-01 | 5,93E-01 |
| <i>ENST00000306565</i> | 1,04  | 3,16E-01 | 5,93E-01 |
| <i>KIFC1</i>           | -1,04 | 3,16E-01 | 5,93E-01 |
| <i>HAL</i>             | -1,04 | 3,16E-01 | 5,93E-01 |
| <i>ASB8</i>            | -1,03 | 3,16E-01 | 5,93E-01 |
| <i>C15orf15</i>        | 1,05  | 3,16E-01 | 5,93E-01 |
| <i>RARB</i>            | -1,06 | 3,16E-01 | 5,94E-01 |
| <i>A1890644</i>        | 1,04  | 3,16E-01 | 5,94E-01 |
| <i>BC014384</i>        | -1,04 | 3,16E-01 | 5,94E-01 |
| <i>A_24_P711009</i>    | -1,04 | 3,16E-01 | 5,94E-01 |
| <i>C9orf25</i>         | 1,03  | 3,16E-01 | 5,94E-01 |
| <i>LOC441066</i>       | 1,04  | 3,16E-01 | 5,94E-01 |
| <i>HNRPH3</i>          | -1,04 | 3,16E-01 | 5,94E-01 |
| <i>A_24_P316074</i>    | -1,04 | 3,16E-01 | 5,94E-01 |
| <i>ENST00000296328</i> | -1,04 | 3,16E-01 | 5,94E-01 |

|                        |       |          |          |
|------------------------|-------|----------|----------|
| <i>BAI2</i>            | -1,07 | 3,16E-01 | 5,94E-01 |
| <i>A_23_P113692</i>    | -1,04 | 3,16E-01 | 5,94E-01 |
| <i>AF130087</i>        | 1,04  | 3,16E-01 | 5,94E-01 |
| <i>AK094874</i>        | -1,05 | 3,17E-01 | 5,94E-01 |
| <i>WNT8B</i>           | 1,04  | 3,17E-01 | 5,94E-01 |
| <i>AW081991</i>        | -1,03 | 3,17E-01 | 5,95E-01 |
| <i>BU561429</i>        | 1,04  | 3,17E-01 | 5,95E-01 |
| <i>THC2339142</i>      | -1,05 | 3,17E-01 | 5,95E-01 |
| <i>ENST00000282169</i> | -1,03 | 3,17E-01 | 5,95E-01 |
| <i>TPPP</i>            | 1,11  | 3,17E-01 | 5,95E-01 |
| <i>LIF</i>             | 1,16  | 3,17E-01 | 5,95E-01 |
| <i>AK021427</i>        | -1,06 | 3,17E-01 | 5,95E-01 |
| <i>FBXL5</i>           | -1,04 | 3,17E-01 | 5,95E-01 |
| <i>FIS1</i>            | 1,03  | 3,17E-01 | 5,95E-01 |
| <i>ENST00000355436</i> | 1,05  | 3,17E-01 | 5,95E-01 |
| <i>MPP2</i>            | 1,09  | 3,17E-01 | 5,95E-01 |
| <i>MUC4</i>            | -1,06 | 3,17E-01 | 5,95E-01 |
| <i>LRIG1</i>           | -1,11 | 3,17E-01 | 5,95E-01 |
| <i>BC033539</i>        | -1,05 | 3,17E-01 | 5,95E-01 |
| <i>L2HGDH</i>          | -1,04 | 3,17E-01 | 5,95E-01 |
| <i>IBTK</i>            | -1,03 | 3,17E-01 | 5,95E-01 |
| <i>THC2441537</i>      | 1,03  | 3,17E-01 | 5,95E-01 |
| <i>NFAM1</i>           | 1,03  | 3,17E-01 | 5,95E-01 |
| <i>PSG4</i>            | -1,05 | 3,17E-01 | 5,95E-01 |
| <i>DFFA</i>            | -1,03 | 3,17E-01 | 5,95E-01 |
| <i>BCORL2</i>          | 1,05  | 3,17E-01 | 5,95E-01 |
| <i>MGC16037</i>        | 1,05  | 3,17E-01 | 5,95E-01 |
| <i>SGOL2</i>           | -1,04 | 3,18E-01 | 5,95E-01 |
| <i>PAX7</i>            | 1,03  | 3,18E-01 | 5,95E-01 |
| <i>THC2318232</i>      | -1,04 | 3,18E-01 | 5,95E-01 |
| <i>THC2440435</i>      | -1,04 | 3,18E-01 | 5,96E-01 |
| <i>MRPL4</i>           | -1,04 | 3,18E-01 | 5,96E-01 |
| <i>SLC15A2</i>         | -1,03 | 3,18E-01 | 5,96E-01 |
| <i>A_24_P917895</i>    | 1,03  | 3,18E-01 | 5,96E-01 |
| <i>A_24_P597242</i>    | 1,04  | 3,18E-01 | 5,96E-01 |
| <i>LOC120379</i>       | 1,04  | 3,18E-01 | 5,96E-01 |
| <i>AF190748</i>        | 1,05  | 3,18E-01 | 5,96E-01 |
| <i>SLC25A30</i>        | 1,05  | 3,18E-01 | 5,96E-01 |
| <i>EPR1</i>            | 1,05  | 3,18E-01 | 5,96E-01 |
| <i>BX091259</i>        | 1,06  | 3,18E-01 | 5,96E-01 |
| <i>IPPK</i>            | -1,05 | 3,18E-01 | 5,96E-01 |
| <i>JMJD1A</i>          | -1,05 | 3,18E-01 | 5,96E-01 |
| <i>AK096991</i>        | 1,03  | 3,18E-01 | 5,96E-01 |
| <i>A_24_P50157</i>     | -1,03 | 3,18E-01 | 5,96E-01 |

|                        |       |          |          |
|------------------------|-------|----------|----------|
| <i>A_24_P940244</i>    | 1,04  | 3,18E-01 | 5,96E-01 |
| <i>ENST00000377411</i> | -1,05 | 3,18E-01 | 5,96E-01 |
| <i>ZFX</i>             | 1,03  | 3,18E-01 | 5,96E-01 |
| <i>A_24_P891276</i>    | 1,04  | 3,18E-01 | 5,96E-01 |
| <i>A_32_P206208</i>    | 1,05  | 3,18E-01 | 5,96E-01 |
| <i>USH3A</i>           | 1,04  | 3,18E-01 | 5,96E-01 |
| <i>RFXDC1</i>          | -1,06 | 3,19E-01 | 5,96E-01 |
| <i>ANKS1B</i>          | -1,04 | 3,19E-01 | 5,96E-01 |
| <i>MGC34725</i>        | -1,07 | 3,19E-01 | 5,97E-01 |
| <i>ENST00000239854</i> | -1,05 | 3,19E-01 | 5,97E-01 |
| <i>D70834</i>          | 1,04  | 3,19E-01 | 5,97E-01 |
| <i>A_23_P79351</i>     | 1,04  | 3,19E-01 | 5,97E-01 |
| <i>KIAA1794</i>        | 1,04  | 3,19E-01 | 5,97E-01 |
| <i>A_24_P502660</i>    | 1,26  | 3,19E-01 | 5,97E-01 |
| <i>BC026998</i>        | -1,10 | 3,19E-01 | 5,97E-01 |
| <i>KM-HN-1</i>         | -1,07 | 3,19E-01 | 5,97E-01 |
| <i>AI500335</i>        | 1,06  | 3,19E-01 | 5,97E-01 |
| <i>A_32_P193771</i>    | 1,09  | 3,19E-01 | 5,97E-01 |
| <i>C10orf35</i>        | 1,10  | 3,19E-01 | 5,97E-01 |
| <i>SPBC25</i>          | -1,05 | 3,19E-01 | 5,97E-01 |
| <i>MAPK10</i>          | -1,05 | 3,19E-01 | 5,97E-01 |
| <i>FLJ39378</i>        | -1,04 | 3,19E-01 | 5,97E-01 |
| <i>DQ168992</i>        | -1,04 | 3,19E-01 | 5,97E-01 |
| <i>C3orf1</i>          | -1,04 | 3,19E-01 | 5,97E-01 |
| <i>A_24_P764866</i>    | 1,03  | 3,19E-01 | 5,97E-01 |
| <i>GPAA1</i>           | 1,06  | 3,19E-01 | 5,97E-01 |
| <i>AT_ssH_PC_3</i>     | -1,09 | 3,19E-01 | 5,97E-01 |
| <i>BF513091</i>        | -1,03 | 3,19E-01 | 5,97E-01 |
| <i>SESTD1</i>          | 1,05  | 3,19E-01 | 5,97E-01 |
| <i>ENST00000373575</i> | 1,05  | 3,19E-01 | 5,97E-01 |
| <i>AKR1A1</i>          | -1,05 | 3,19E-01 | 5,97E-01 |
| <i>A_24_P566027</i>    | -1,07 | 3,19E-01 | 5,97E-01 |
| <i>AF161364</i>        | 1,04  | 3,19E-01 | 5,97E-01 |
| <i>RP3-377H14.5</i>    | -1,04 | 3,19E-01 | 5,97E-01 |
| <i>RAET1K</i>          | -1,03 | 3,19E-01 | 5,97E-01 |
| <i>U2AF1L2</i>         | 1,03  | 3,19E-01 | 5,97E-01 |
| <i>TOM1</i>            | 1,06  | 3,19E-01 | 5,97E-01 |
| <i>SLC26A10</i>        | 1,08  | 3,19E-01 | 5,97E-01 |
| <i>R38716</i>          | 1,04  | 3,20E-01 | 5,97E-01 |
| <i>FLJ20254</i>        | -1,05 | 3,20E-01 | 5,97E-01 |
| <i>LOC441320</i>       | -1,05 | 3,20E-01 | 5,97E-01 |
| <i>ZNF586</i>          | -1,03 | 3,20E-01 | 5,97E-01 |
| <i>BQ772270</i>        | 1,04  | 3,20E-01 | 5,97E-01 |
| <i>METTL1</i>          | -1,09 | 3,20E-01 | 5,97E-01 |

|                        |       |          |          |
|------------------------|-------|----------|----------|
| <i>BM474343</i>        | -1,05 | 3,20E-01 | 5,97E-01 |
| <i>C9orf36</i>         | -1,04 | 3,20E-01 | 5,97E-01 |
| <i>38412</i>           | 1,03  | 3,20E-01 | 5,97E-01 |
| <i>CCPG1</i>           | 1,04  | 3,20E-01 | 5,97E-01 |
| <i>GPI</i>             | 1,05  | 3,20E-01 | 5,97E-01 |
| <i>ENST00000381318</i> | -1,04 | 3,20E-01 | 5,98E-01 |
| <i>CR613736</i>        | -1,04 | 3,20E-01 | 5,98E-01 |
| <i>A_24_P673119</i>    | -1,03 | 3,20E-01 | 5,98E-01 |
| <i>THC2376349</i>      | 1,03  | 3,20E-01 | 5,98E-01 |
| <i>KLHL11</i>          | 1,04  | 3,20E-01 | 5,98E-01 |
| <i>SCRG1</i>           | 1,18  | 3,20E-01 | 5,98E-01 |
| <i>DLST</i>            | 1,05  | 3,20E-01 | 5,98E-01 |
| <i>TIGA1</i>           | 1,58  | 3,20E-01 | 5,98E-01 |
| <i>LMX1B</i>           | -1,03 | 3,20E-01 | 5,98E-01 |
| <i>USP25</i>           | -1,05 | 3,20E-01 | 5,98E-01 |
| <i>ENST00000376573</i> | -1,04 | 3,20E-01 | 5,98E-01 |
| <i>UBE1C</i>           | -1,03 | 3,20E-01 | 5,98E-01 |
| <i>PHF11</i>           | 1,03  | 3,20E-01 | 5,98E-01 |
| <i>THC2331921</i>      | 1,03  | 3,20E-01 | 5,98E-01 |
| <i>SDHA</i>            | 1,03  | 3,20E-01 | 5,98E-01 |
| <i>VN1R2</i>           | 1,04  | 3,20E-01 | 5,98E-01 |
| <i>TRERF1</i>          | 1,07  | 3,20E-01 | 5,98E-01 |
| <i>CLEC14A</i>         | 1,08  | 3,20E-01 | 5,98E-01 |
| <i>A_24_P856273</i>    | 1,12  | 3,20E-01 | 5,98E-01 |
| <i>A_24_P930487</i>    | 1,07  | 3,21E-01 | 5,98E-01 |
| <i>THC2381151</i>      | 1,04  | 3,21E-01 | 5,98E-01 |
| <i>AI225215</i>        | 1,04  | 3,21E-01 | 5,98E-01 |
| <i>PDCD8</i>           | -1,04 | 3,21E-01 | 5,98E-01 |
| <i>AF264625</i>        | 1,04  | 3,21E-01 | 5,98E-01 |
| <i>TIMD4</i>           | -1,06 | 3,21E-01 | 5,98E-01 |
| <i>BE855644</i>        | -1,05 | 3,21E-01 | 5,98E-01 |
| <i>TXNDC9</i>          | -1,04 | 3,21E-01 | 5,98E-01 |
| <i>HLA-B</i>           | -1,04 | 3,21E-01 | 5,98E-01 |
| <i>AF116661</i>        | -1,04 | 3,21E-01 | 5,98E-01 |
| <i>AK124576</i>        | 1,04  | 3,21E-01 | 5,98E-01 |
| <i>PLEKHG2</i>         | 1,05  | 3,21E-01 | 5,98E-01 |
| <i>THC2336161</i>      | -1,04 | 3,21E-01 | 5,99E-01 |
| <i>C20orf165</i>       | 1,03  | 3,21E-01 | 5,99E-01 |
| <i>AX721087</i>        | 1,24  | 3,21E-01 | 5,99E-01 |
| <i>TMEM27</i>          | -1,05 | 3,21E-01 | 5,99E-01 |
| <i>SLC30A10</i>        | 1,06  | 3,21E-01 | 5,99E-01 |
| <i>ENST00000312847</i> | 1,09  | 3,21E-01 | 5,99E-01 |
| <i>THC2386267</i>      | -1,04 | 3,21E-01 | 5,99E-01 |
| <i>SLC12A7</i>         | 1,04  | 3,21E-01 | 5,99E-01 |

|                        |       |          |          |
|------------------------|-------|----------|----------|
| <i>ENST00000303521</i> | -1,08 | 3,21E-01 | 5,99E-01 |
| <i>RPL23</i>           | -1,05 | 3,21E-01 | 5,99E-01 |
| <i>FLJ32110</i>        | 1,03  | 3,21E-01 | 5,99E-01 |
| <i>ATP7B</i>           | 1,04  | 3,21E-01 | 5,99E-01 |
| <i>FAM83C</i>          | 1,08  | 3,21E-01 | 5,99E-01 |
| <i>ARC</i>             | 1,19  | 3,21E-01 | 5,99E-01 |
| <i>THC2442586</i>      | -1,04 | 3,21E-01 | 5,99E-01 |
| <i>MRPS35</i>          | -1,04 | 3,22E-01 | 5,99E-01 |
| <i>AF010235</i>        | -1,04 | 3,22E-01 | 5,99E-01 |
| <i>RHOT2</i>           | 1,05  | 3,22E-01 | 5,99E-01 |
| <i>POU2F3</i>          | 1,09  | 3,22E-01 | 5,99E-01 |
| <i>MRGPRX3</i>         | -1,05 | 3,22E-01 | 5,99E-01 |
| <i>AI816119</i>        | 1,06  | 3,22E-01 | 5,99E-01 |
| <i>ENST00000332289</i> | -1,03 | 3,22E-01 | 5,99E-01 |
| <i>AK092895</i>        | 1,04  | 3,22E-01 | 5,99E-01 |
| <i>AF116680</i>        | 1,04  | 3,22E-01 | 5,99E-01 |
| <i>SLFN12</i>          | -1,04 | 3,22E-01 | 5,99E-01 |
| <i>TEKT4</i>           | -1,09 | 3,22E-01 | 5,99E-01 |
| <i>AI206757</i>        | 1,04  | 3,22E-01 | 5,99E-01 |
| <i>BC031325</i>        | 1,04  | 3,22E-01 | 5,99E-01 |
| <i>A_24_P315255</i>    | 1,07  | 3,22E-01 | 5,99E-01 |
| <i>SURF1</i>           | 1,04  | 3,22E-01 | 5,99E-01 |
| <i>ENST00000358162</i> | -1,04 | 3,22E-01 | 6,00E-01 |
| <i>PRR11</i>           | -1,07 | 3,22E-01 | 6,00E-01 |
| <i>BX100565</i>        | 1,03  | 3,22E-01 | 6,00E-01 |
| <i>HES6</i>            | 1,04  | 3,22E-01 | 6,00E-01 |
| <i>ZNF367</i>          | -1,04 | 3,23E-01 | 6,00E-01 |
| <i>DB363693</i>        | 1,04  | 3,23E-01 | 6,00E-01 |
| <i>A_24_P712845</i>    | 1,04  | 3,22E-01 | 6,00E-01 |
| <i>KIF18A</i>          | 1,05  | 3,22E-01 | 6,00E-01 |
| <i>USP44</i>           | -1,06 | 3,23E-01 | 6,00E-01 |
| <i>A_24_P856176</i>    | 1,05  | 3,23E-01 | 6,00E-01 |
| <i>TDRD10</i>          | -1,05 | 3,23E-01 | 6,00E-01 |
| <i>CB243475</i>        | -1,04 | 3,23E-01 | 6,00E-01 |
| <i>AP4E1</i>           | -1,03 | 3,23E-01 | 6,00E-01 |
| <i>ENST00000344293</i> | 1,05  | 3,23E-01 | 6,00E-01 |
| <i>KLF13</i>           | 1,06  | 3,23E-01 | 6,00E-01 |
| <i>BF896527</i>        | 1,07  | 3,23E-01 | 6,00E-01 |
| <i>GALNT7</i>          | -1,05 | 3,23E-01 | 6,00E-01 |
| <i>AL137705</i>        | 1,06  | 3,23E-01 | 6,00E-01 |
| <i>CNAP1</i>           | -1,06 | 3,23E-01 | 6,00E-01 |
| <i>RHOBTB3</i>         | -1,05 | 3,23E-01 | 6,00E-01 |
| <i>AU144988</i>        | -1,05 | 3,23E-01 | 6,00E-01 |
| <i>SCO1</i>            | -1,04 | 3,23E-01 | 6,00E-01 |

|                        |       |          |          |
|------------------------|-------|----------|----------|
| <i>LOC123876</i>       | 1,03  | 3,23E-01 | 6,00E-01 |
| <i>TRIAD3</i>          | 1,04  | 3,23E-01 | 6,00E-01 |
| <i>THC2393026</i>      | 1,04  | 3,23E-01 | 6,00E-01 |
| <i>HLA-DRB1</i>        | -1,06 | 3,23E-01 | 6,00E-01 |
| <i>HSPC152</i>         | -1,04 | 3,23E-01 | 6,00E-01 |
| <i>ABCD4</i>           | -1,05 | 3,23E-01 | 6,01E-01 |
| <i>AI630435</i>        | 1,07  | 3,23E-01 | 6,01E-01 |
| <i>SUPT5H</i>          | 1,03  | 3,23E-01 | 6,01E-01 |
| <i>BF836076</i>        | 1,16  | 3,23E-01 | 6,01E-01 |
| <i>LCN8</i>            | 1,03  | 3,23E-01 | 6,01E-01 |
| <i>GPR161</i>          | -1,12 | 3,24E-01 | 6,01E-01 |
| <i>BQ881683</i>        | 1,10  | 3,24E-01 | 6,01E-01 |
| <i>THC2376529</i>      | -1,06 | 3,24E-01 | 6,01E-01 |
| <i>THC2372503</i>      | -1,05 | 3,24E-01 | 6,01E-01 |
| <i>KIAA0251</i>        | -1,04 | 3,24E-01 | 6,01E-01 |
| <i>ENST00000307214</i> | -1,04 | 3,24E-01 | 6,01E-01 |
| <i>TLK2</i>            | 1,03  | 3,24E-01 | 6,01E-01 |
| <i>C3orf37</i>         | 1,04  | 3,24E-01 | 6,01E-01 |
| <i>UQCRQ</i>           | 1,05  | 3,24E-01 | 6,01E-01 |
| <i>ALPPL2</i>          | 1,05  | 3,24E-01 | 6,01E-01 |
| <i>AK091337</i>        | 1,06  | 3,24E-01 | 6,01E-01 |
| <i>THC2369034</i>      | -1,03 | 3,24E-01 | 6,01E-01 |
| <i>A_24_P644556</i>    | -1,03 | 3,24E-01 | 6,01E-01 |
| <i>CITED2</i>          | -1,17 | 3,24E-01 | 6,01E-01 |
| <i>BE710245</i>        | 1,05  | 3,24E-01 | 6,01E-01 |
| <i>HYPE</i>            | -1,07 | 3,24E-01 | 6,01E-01 |
| <i>THC2335347</i>      | -1,04 | 3,24E-01 | 6,01E-01 |
| <i>ZNF213</i>          | -1,04 | 3,24E-01 | 6,01E-01 |
| <i>THC2307937</i>      | -1,03 | 3,24E-01 | 6,01E-01 |
| <i>KERA</i>            | -1,06 | 3,24E-01 | 6,01E-01 |
| <i>CYP2R1</i>          | -1,05 | 3,24E-01 | 6,01E-01 |
| <i>AA235942</i>        | -1,04 | 3,24E-01 | 6,01E-01 |
| <i>IFT122</i>          | -1,04 | 3,24E-01 | 6,01E-01 |
| <i>THC2378813</i>      | -1,03 | 3,24E-01 | 6,01E-01 |
| <i>FGD1</i>            | 1,03  | 3,24E-01 | 6,01E-01 |
| <i>ATPBD1B</i>         | 1,04  | 3,24E-01 | 6,01E-01 |
| <i>A_24_P247616</i>    | 1,05  | 3,24E-01 | 6,01E-01 |
| <i>BI966004</i>        | 1,05  | 3,24E-01 | 6,01E-01 |
| <i>CMPK</i>            | -1,05 | 3,24E-01 | 6,01E-01 |
| <i>AF138860</i>        | -1,03 | 3,24E-01 | 6,02E-01 |
| <i>FLJ38288</i>        | -1,05 | 3,24E-01 | 6,02E-01 |
| <i>AU145408</i>        | 1,07  | 3,24E-01 | 6,02E-01 |
| <i>A_24_P916853</i>    | 1,09  | 3,25E-01 | 6,02E-01 |
| <i>THC2341217</i>      | -1,04 | 3,25E-01 | 6,02E-01 |

|                        |       |          |          |
|------------------------|-------|----------|----------|
| <i>IL22RA1</i>         | -1,08 | 3,25E-01 | 6,02E-01 |
| <i>ENPEP</i>           | -1,08 | 3,25E-01 | 6,02E-01 |
| <i>POLK</i>            | -1,04 | 3,25E-01 | 6,02E-01 |
| <i>OR13D1</i>          | 1,04  | 3,25E-01 | 6,02E-01 |
| <i>THC2356981</i>      | 1,05  | 3,25E-01 | 6,02E-01 |
| <i>GPX5</i>            | 1,05  | 3,25E-01 | 6,02E-01 |
| <i>BC016673</i>        | 1,04  | 3,25E-01 | 6,02E-01 |
| <i>ENST00000328411</i> | 1,04  | 3,25E-01 | 6,02E-01 |
| <i>NKX2-8</i>          | 1,06  | 3,25E-01 | 6,02E-01 |
| <i>MMP9</i>            | -1,18 | 3,25E-01 | 6,02E-01 |
| <i>KLF5</i>            | -1,15 | 3,25E-01 | 6,02E-01 |
| <i>NOC4L</i>           | 1,03  | 3,25E-01 | 6,02E-01 |
| <i>PSMB4</i>           | 1,03  | 3,25E-01 | 6,02E-01 |
| <i>GSR</i>             | 1,04  | 3,25E-01 | 6,02E-01 |
| <i>OLIG2</i>           | 1,04  | 3,25E-01 | 6,02E-01 |
| <i>A_24_P358534</i>    | 1,04  | 3,25E-01 | 6,03E-01 |
| <i>BC013077</i>        | -1,05 | 3,25E-01 | 6,03E-01 |
| <i>ENST00000343571</i> | -1,03 | 3,25E-01 | 6,03E-01 |
| <i>ENST00000370774</i> | -1,03 | 3,25E-01 | 6,03E-01 |
| <i>AA005355</i>        | 1,05  | 3,26E-01 | 6,03E-01 |
| <i>MYH14</i>           | 1,05  | 3,26E-01 | 6,03E-01 |
| <i>F8</i>              | -1,04 | 3,26E-01 | 6,03E-01 |
| <i>C20orf24</i>        | 1,03  | 3,26E-01 | 6,03E-01 |
| <i>PGRMC1</i>          | 1,05  | 3,26E-01 | 6,03E-01 |
| <i>DHX35</i>           | -1,07 | 3,26E-01 | 6,03E-01 |
| <i>ENST00000359713</i> | -1,05 | 3,26E-01 | 6,03E-01 |
| <i>THC2376015</i>      | -1,03 | 3,26E-01 | 6,03E-01 |
| <i>SNX2</i>            | 1,04  | 3,26E-01 | 6,03E-01 |
| <i>ENST00000308621</i> | 1,05  | 3,26E-01 | 6,03E-01 |
| <i>AJ412029</i>        | 1,04  | 3,26E-01 | 6,03E-01 |
| <i>FAM122C</i>         | -1,04 | 3,26E-01 | 6,03E-01 |
| <i>UGT2B4</i>          | 1,03  | 3,26E-01 | 6,03E-01 |
| <i>ENST00000378266</i> | 1,06  | 3,26E-01 | 6,03E-01 |
| <i>GPR89A</i>          | -1,03 | 3,26E-01 | 6,03E-01 |
| <i>CR749652</i>        | -1,08 | 3,26E-01 | 6,04E-01 |
| <i>BI009763</i>        | 1,05  | 3,26E-01 | 6,04E-01 |
| <i>ARFGAP3</i>         | -1,05 | 3,26E-01 | 6,04E-01 |
| <i>ZNF706</i>          | 1,04  | 3,26E-01 | 6,04E-01 |
| <i>RPIP8</i>           | 1,04  | 3,26E-01 | 6,04E-01 |
| <i>LOC642378</i>       | 1,03  | 3,26E-01 | 6,04E-01 |
| <i>SLC17A1</i>         | 1,05  | 3,26E-01 | 6,04E-01 |
| <i>ENST00000341700</i> | -1,08 | 3,27E-01 | 6,04E-01 |
| <i>ENST00000308498</i> | -1,04 | 3,27E-01 | 6,04E-01 |
| <i>TGM4</i>            | 1,02  | 3,27E-01 | 6,04E-01 |

|                        |       |          |          |
|------------------------|-------|----------|----------|
| <i>A_24_P937506</i>    | 1,04  | 3,27E-01 | 6,04E-01 |
| <i>A_24_P932488</i>    | 1,03  | 3,27E-01 | 6,04E-01 |
| <i>PDE1C</i>           | 1,06  | 3,27E-01 | 6,04E-01 |
| <i>BC039524</i>        | -1,04 | 3,27E-01 | 6,04E-01 |
| <i>LCE2B</i>           | -1,03 | 3,27E-01 | 6,04E-01 |
| <i>A_32_P153916</i>    | 1,07  | 3,27E-01 | 6,04E-01 |
| <i>FAM79B</i>          | -1,14 | 3,27E-01 | 6,04E-01 |
| <i>LEPRE1</i>          | -1,11 | 3,27E-01 | 6,04E-01 |
| <i>ENST00000320662</i> | -1,05 | 3,27E-01 | 6,04E-01 |
| <i>DTX2</i>            | -1,04 | 3,27E-01 | 6,04E-01 |
| <i>SPAG4</i>           | -1,04 | 3,27E-01 | 6,04E-01 |
| <i>LOC400891</i>       | -1,04 | 3,27E-01 | 6,04E-01 |
| <i>RETN</i>            | -1,04 | 3,27E-01 | 6,04E-01 |
| <i>SDCCAG8</i>         | -1,03 | 3,27E-01 | 6,04E-01 |
| <i>MTTP</i>            | 1,04  | 3,27E-01 | 6,04E-01 |
| <i>AW450111</i>        | 1,04  | 3,27E-01 | 6,04E-01 |
| <i>CR609588</i>        | 1,05  | 3,27E-01 | 6,04E-01 |
| <i>FAM43B</i>          | 1,12  | 3,27E-01 | 6,04E-01 |
| <i>AVIL</i>            | -1,07 | 3,27E-01 | 6,04E-01 |
| <i>SUMO3</i>           | -1,04 | 3,27E-01 | 6,04E-01 |
| <i>ENST00000343989</i> | 1,04  | 3,27E-01 | 6,04E-01 |
| <i>CYC1</i>            | 1,04  | 3,27E-01 | 6,04E-01 |
| <i>BC001764</i>        | 1,05  | 3,27E-01 | 6,04E-01 |
| <i>FLJ30707</i>        | -1,05 | 3,27E-01 | 6,04E-01 |
| <i>THC2306788</i>      | 1,07  | 3,27E-01 | 6,04E-01 |
| <i>BG217059</i>        | 1,13  | 3,27E-01 | 6,04E-01 |
| <i>A_24_P913391</i>    | -1,05 | 3,27E-01 | 6,04E-01 |
| <i>AK074346</i>        | 1,03  | 3,27E-01 | 6,04E-01 |
| <i>STAT5A</i>          | 1,04  | 3,27E-01 | 6,04E-01 |
| <i>ALDH16A1</i>        | 1,04  | 3,27E-01 | 6,04E-01 |
| <i>CPVL</i>            | -1,07 | 3,27E-01 | 6,04E-01 |
| <i>ENST00000319098</i> | 1,04  | 3,27E-01 | 6,04E-01 |
| <i>A_32_P145490</i>    | 1,04  | 3,27E-01 | 6,04E-01 |
| <i>KRT25</i>           | 1,05  | 3,27E-01 | 6,04E-01 |
| <i>ENST00000302078</i> | -1,07 | 3,27E-01 | 6,04E-01 |
| <i>A_24_P410246</i>    | 1,10  | 3,28E-01 | 6,04E-01 |
| <i>AK126329</i>        | -1,06 | 3,28E-01 | 6,04E-01 |
| <i>A_24_P84808</i>     | -1,04 | 3,28E-01 | 6,04E-01 |
| <i>AK091978</i>        | 1,04  | 3,28E-01 | 6,04E-01 |
| <i>A_23_P206568</i>    | -1,06 | 3,28E-01 | 6,04E-01 |
| <i>MGC99813</i>        | -1,07 | 3,28E-01 | 6,04E-01 |
| <i>BM983822</i>        | -1,05 | 3,28E-01 | 6,04E-01 |
| <i>LYG2</i>            | -1,04 | 3,28E-01 | 6,05E-01 |
| <i>SPATA16</i>         | 1,03  | 3,28E-01 | 6,05E-01 |



|                        |       |          |          |
|------------------------|-------|----------|----------|
| <i>HMP19</i>           | -1,10 | 3,28E-01 | 6,05E-01 |
| <i>BC009905</i>        | -1,03 | 3,28E-01 | 6,05E-01 |
| <i>MCART2</i>          | 1,03  | 3,28E-01 | 6,05E-01 |
| <i>BC045781</i>        | 1,04  | 3,28E-01 | 6,05E-01 |
| <i>RAPGEFL1</i>        | -1,08 | 3,28E-01 | 6,05E-01 |
| <i>CHRNA</i>           | -1,04 | 3,28E-01 | 6,05E-01 |
| <i>PTOV1</i>           | -1,04 | 3,28E-01 | 6,05E-01 |
| <i>FLJ20712</i>        | -1,03 | 3,28E-01 | 6,05E-01 |
| <i>FLJ36116</i>        | 1,03  | 3,28E-01 | 6,05E-01 |
| <i>PRO1483</i>         | 1,04  | 3,28E-01 | 6,05E-01 |
| <i>FLJ10661</i>        | 1,04  | 3,28E-01 | 6,05E-01 |
| <i>SNAG1</i>           | 1,05  | 3,28E-01 | 6,05E-01 |
| <i>ENST00000272885</i> | 1,05  | 3,28E-01 | 6,05E-01 |
| <i>LOC148709</i>       | 1,06  | 3,28E-01 | 6,05E-01 |
| <i>UNC5C</i>           | 1,08  | 3,28E-01 | 6,05E-01 |
| <i>MAP2K7</i>          | -1,04 | 3,29E-01 | 6,05E-01 |
| <i>ABCA12</i>          | 1,04  | 3,29E-01 | 6,05E-01 |
| <i>COX6A2</i>          | 1,05  | 3,29E-01 | 6,05E-01 |
| <i>SLC25A23</i>        | 1,06  | 3,29E-01 | 6,05E-01 |
| <i>CV323908</i>        | 1,04  | 3,29E-01 | 6,05E-01 |
| <i>A_23_P165513</i>    | 1,04  | 3,29E-01 | 6,05E-01 |
| <i>ENST00000373210</i> | -1,04 | 3,29E-01 | 6,05E-01 |
| <i>CR621244</i>        | -1,04 | 3,29E-01 | 6,05E-01 |
| <i>EXOSC6</i>          | 1,03  | 3,29E-01 | 6,05E-01 |
| <i>AK022168</i>        | 1,07  | 3,29E-01 | 6,05E-01 |
| <i>A_24_P764595</i>    | 1,06  | 3,29E-01 | 6,05E-01 |
| <i>LOC644072</i>       | -1,05 | 3,29E-01 | 6,05E-01 |
| <i>BCNP1</i>           | -1,04 | 3,29E-01 | 6,05E-01 |
| <i>ZGPAT</i>           | 1,03  | 3,29E-01 | 6,05E-01 |
| <i>A_24_P919403</i>    | 1,04  | 3,29E-01 | 6,05E-01 |
| <i>RASGRF2</i>         | 1,05  | 3,29E-01 | 6,05E-01 |
| <i>NXT2</i>            | 1,07  | 3,29E-01 | 6,05E-01 |
| <i>TMEM14A</i>         | 1,04  | 3,29E-01 | 6,05E-01 |
| <i>C6orf55</i>         | -1,04 | 3,29E-01 | 6,06E-01 |
| <i>THC2337832</i>      | 1,13  | 3,29E-01 | 6,06E-01 |
| <i>CCDC98</i>          | -1,04 | 3,29E-01 | 6,06E-01 |
| <i>A_24_P161074</i>    | -1,09 | 3,29E-01 | 6,06E-01 |
| <i>TWIST2</i>          | -1,08 | 3,29E-01 | 6,06E-01 |
| <i>PDE4C</i>           | -1,09 | 3,29E-01 | 6,06E-01 |
| <i>THC2406937</i>      | -1,03 | 3,29E-01 | 6,06E-01 |
| <i>TRIM17</i>          | 1,04  | 3,30E-01 | 6,06E-01 |
| <i>PTPN20B</i>         | -1,04 | 3,30E-01 | 6,06E-01 |
| <i>WNK3</i>            | 1,02  | 3,30E-01 | 6,06E-01 |
| <i>C14orf102</i>       | -1,04 | 3,30E-01 | 6,06E-01 |

|                 |       |          |          |
|-----------------|-------|----------|----------|
| ZMYND11         | 1,05  | 3,30E-01 | 6,06E-01 |
| AV647379        | 1,05  | 3,30E-01 | 6,06E-01 |
| THC2286492      | 1,03  | 3,30E-01 | 6,07E-01 |
| TRIM55          | -1,03 | 3,30E-01 | 6,07E-01 |
| CR613267        | 1,04  | 3,30E-01 | 6,07E-01 |
| SIM1            | 1,05  | 3,30E-01 | 6,07E-01 |
| MPO             | 1,04  | 3,30E-01 | 6,07E-01 |
| CREB3L3         | 1,03  | 3,30E-01 | 6,07E-01 |
| HSD3B7          | 1,05  | 3,30E-01 | 6,07E-01 |
| EIF2AK1         | -1,04 | 3,30E-01 | 6,07E-01 |
| ARHGAP6         | -1,07 | 3,30E-01 | 6,07E-01 |
| TTYH3           | 1,05  | 3,30E-01 | 6,07E-01 |
| A_24_P375360    | 1,05  | 3,30E-01 | 6,07E-01 |
| CBX3            | 1,04  | 3,30E-01 | 6,07E-01 |
| A_32_P131998    | -1,06 | 3,30E-01 | 6,07E-01 |
| BU940040        | -1,04 | 3,30E-01 | 6,07E-01 |
| ABI2            | -1,03 | 3,30E-01 | 6,07E-01 |
| FLJ41747        | 1,07  | 3,30E-01 | 6,07E-01 |
| FLNB            | -1,05 | 3,31E-01 | 6,07E-01 |
| FLJ44048        | -1,04 | 3,31E-01 | 6,07E-01 |
| AF052115        | -1,06 | 3,31E-01 | 6,07E-01 |
| CABC1           | -1,05 | 3,31E-01 | 6,07E-01 |
| AFF1            | -1,04 | 3,31E-01 | 6,07E-01 |
| AK057355        | -1,03 | 3,31E-01 | 6,07E-01 |
| LOC645591       | -1,03 | 3,31E-01 | 6,07E-01 |
| BG190831        | 1,05  | 3,31E-01 | 6,07E-01 |
| FAM19A2         | 1,11  | 3,31E-01 | 6,07E-01 |
| AF093744        | -1,04 | 3,31E-01 | 6,07E-01 |
| ATXN7L1         | -1,04 | 3,31E-01 | 6,07E-01 |
| CES4            | -1,04 | 3,31E-01 | 6,07E-01 |
| A_24_P678034    | -1,04 | 3,31E-01 | 6,07E-01 |
| VHLL            | -1,04 | 3,31E-01 | 6,07E-01 |
| NAT11           | -1,02 | 3,31E-01 | 6,07E-01 |
| PARD6G          | 1,03  | 3,31E-01 | 6,07E-01 |
| MAPK8IP3        | 1,03  | 3,31E-01 | 6,07E-01 |
| THC2344045      | 1,05  | 3,31E-01 | 6,07E-01 |
| BTNL8           | 1,05  | 3,31E-01 | 6,07E-01 |
| CDH4            | 1,14  | 3,31E-01 | 6,07E-01 |
| HSPB1           | -1,08 | 3,31E-01 | 6,07E-01 |
| DPPA5           | -1,03 | 3,31E-01 | 6,07E-01 |
| ENST00000310218 | 1,05  | 3,31E-01 | 6,07E-01 |
| ZWINT           | -1,07 | 3,31E-01 | 6,07E-01 |
| RNF175          | 1,11  | 3,31E-01 | 6,08E-01 |
| BC022390        | 1,03  | 3,31E-01 | 6,08E-01 |

|                        |       |          |          |
|------------------------|-------|----------|----------|
| <i>GRIK5</i>           | 1,03  | 3,31E-01 | 6,08E-01 |
| <i>ENST00000343149</i> | 1,05  | 3,31E-01 | 6,08E-01 |
| <i>BC040702</i>        | -1,08 | 3,32E-01 | 6,08E-01 |
| <i>A_24_P938036</i>    | 1,03  | 3,32E-01 | 6,08E-01 |
| <i>SPBC24</i>          | 1,04  | 3,32E-01 | 6,08E-01 |
| <i>A_24_P632230</i>    | 1,12  | 3,32E-01 | 6,08E-01 |
| <i>C5orf23</i>         | -1,10 | 3,32E-01 | 6,08E-01 |
| <i>CCDC53</i>          | -1,05 | 3,32E-01 | 6,08E-01 |
| <i>AF132206</i>        | -1,04 | 3,32E-01 | 6,08E-01 |
| <i>DUX2</i>            | -1,04 | 3,32E-01 | 6,08E-01 |
| <i>AI022779</i>        | -1,03 | 3,32E-01 | 6,08E-01 |
| <i>SLC16A11</i>        | 1,03  | 3,32E-01 | 6,08E-01 |
| <i>CYP4Z2P</i>         | 1,03  | 3,32E-01 | 6,08E-01 |
| <i>CCRL1</i>           | -1,09 | 3,32E-01 | 6,08E-01 |
| <i>AK1</i>             | 1,05  | 3,32E-01 | 6,08E-01 |
| <i>CDKN3</i>           | 1,05  | 3,32E-01 | 6,08E-01 |
| <i>OSBPL10</i>         | -1,06 | 3,32E-01 | 6,08E-01 |
| <i>ENST00000371310</i> | 1,04  | 3,32E-01 | 6,08E-01 |
| <i>CRK</i>             | 1,04  | 3,32E-01 | 6,08E-01 |
| <i>A_32_P70237</i>     | 1,04  | 3,32E-01 | 6,08E-01 |
| <i>HTR3D</i>           | 1,04  | 3,32E-01 | 6,08E-01 |
| <i>FBXO18</i>          | 1,05  | 3,32E-01 | 6,08E-01 |
| <i>AQP6</i>            | 1,05  | 3,32E-01 | 6,08E-01 |
| <i>LRRC1</i>           | 1,06  | 3,32E-01 | 6,08E-01 |
| <i>TEPP</i>            | -1,06 | 3,32E-01 | 6,08E-01 |
| <i>TOMM7</i>           | -1,04 | 3,32E-01 | 6,08E-01 |
| <i>PAQR4</i>           | 1,03  | 3,32E-01 | 6,08E-01 |
| <i>MGC27016</i>        | 1,03  | 3,32E-01 | 6,08E-01 |
| <i>THC2293989</i>      | 1,05  | 3,32E-01 | 6,08E-01 |
| <i>AK074614</i>        | 1,03  | 3,32E-01 | 6,08E-01 |
| <i>AQP12A</i>          | 1,04  | 3,32E-01 | 6,08E-01 |
| <i>TLR2</i>            | -1,10 | 3,32E-01 | 6,09E-01 |
| <i>GFRA1</i>           | 1,09  | 3,32E-01 | 6,09E-01 |
| <i>SFTPG</i>           | -1,11 | 3,33E-01 | 6,09E-01 |
| <i>NSMAF</i>           | -1,03 | 3,33E-01 | 6,09E-01 |
| <i>PDE6H</i>           | -1,04 | 3,33E-01 | 6,09E-01 |
| <i>SUNC1</i>           | 1,03  | 3,33E-01 | 6,09E-01 |
| <i>LOC221814</i>       | 1,05  | 3,33E-01 | 6,09E-01 |
| <i>ENST00000325863</i> | -1,03 | 3,33E-01 | 6,09E-01 |
| <i>RARS</i>            | -1,03 | 3,33E-01 | 6,09E-01 |
| <i>MGC33657</i>        | 1,04  | 3,33E-01 | 6,09E-01 |
| <i>GALNTL5</i>         | -1,04 | 3,33E-01 | 6,09E-01 |
| <i>CNTN5</i>           | 1,05  | 3,33E-01 | 6,09E-01 |
| <i>SH3GL3</i>          | -1,08 | 3,33E-01 | 6,09E-01 |

|                     |       |          |          |
|---------------------|-------|----------|----------|
| <i>A_24_P24790</i>  | -1,04 | 3,33E-01 | 6,09E-01 |
| <i>BQ323258</i>     | 1,04  | 3,33E-01 | 6,09E-01 |
| <i>A_32_P111492</i> | 1,06  | 3,33E-01 | 6,09E-01 |
| <i>KRT27</i>        | -1,07 | 3,33E-01 | 6,09E-01 |
| <i>GCRG224</i>      | -1,09 | 3,33E-01 | 6,10E-01 |
| <i>FCRLM2</i>       | 1,06  | 3,33E-01 | 6,10E-01 |
| <i>BX114764</i>     | -1,07 | 3,33E-01 | 6,10E-01 |
| <i>CREBBP</i>       | 1,05  | 3,33E-01 | 6,10E-01 |
| <i>CMYA1</i>        | 1,05  | 3,33E-01 | 6,10E-01 |
| <i>KIAA0892</i>     | -1,04 | 3,33E-01 | 6,10E-01 |
| <i>KCNJ1</i>        | 1,03  | 3,33E-01 | 6,10E-01 |
| <i>C21orf6</i>      | -1,04 | 3,34E-01 | 6,10E-01 |
| <i>FLJ31356</i>     | 1,05  | 3,34E-01 | 6,10E-01 |
| <i>CCDC75</i>       | 1,07  | 3,34E-01 | 6,10E-01 |
| <i>PDIA5</i>        | 1,10  | 3,34E-01 | 6,10E-01 |
| <i>THC2282706</i>   | -1,09 | 3,34E-01 | 6,10E-01 |
| <i>THC2405550</i>   | -1,07 | 3,34E-01 | 6,10E-01 |
| <i>A_24_P628766</i> | 1,04  | 3,34E-01 | 6,10E-01 |
| <i>RCL1</i>         | 1,06  | 3,34E-01 | 6,10E-01 |
| <i>UNC84B</i>       | 1,08  | 3,34E-01 | 6,10E-01 |
| <i>THC2435127</i>   | -1,05 | 3,34E-01 | 6,10E-01 |
| <i>RECQL4</i>       | -1,04 | 3,34E-01 | 6,10E-01 |
| <i>A_24_P196134</i> | 1,05  | 3,34E-01 | 6,10E-01 |
| <i>PLA2G2E</i>      | 1,06  | 3,34E-01 | 6,10E-01 |
| <i>TXNDCC6</i>      | -1,03 | 3,34E-01 | 6,10E-01 |
| <i>STX4</i>         | 1,03  | 3,34E-01 | 6,10E-01 |
| <i>C1QL2</i>        | 1,04  | 3,34E-01 | 6,10E-01 |
| <i>A_23_P136296</i> | 1,05  | 3,34E-01 | 6,10E-01 |
| <i>MRPL20</i>       | 1,03  | 3,34E-01 | 6,10E-01 |
| <i>FBXO44</i>       | -1,04 | 3,34E-01 | 6,10E-01 |
| <i>BX329117</i>     | -1,04 | 3,34E-01 | 6,10E-01 |
| <i>THC2376537</i>   | 1,03  | 3,34E-01 | 6,10E-01 |
| <i>A_32_P69639</i>  | 1,03  | 3,34E-01 | 6,10E-01 |
| <i>C6orf85</i>      | -1,05 | 3,34E-01 | 6,10E-01 |
| <i>DPYSL5</i>       | 1,04  | 3,34E-01 | 6,11E-01 |
| <i>MGC34647</i>     | 1,06  | 3,35E-01 | 6,11E-01 |
| <i>IFT88</i>        | -1,04 | 3,35E-01 | 6,11E-01 |
| <i>GRM6</i>         | -1,03 | 3,35E-01 | 6,11E-01 |
| <i>ETG10_234183</i> | 1,02  | 3,35E-01 | 6,11E-01 |
| <i>BM725480</i>     | 1,04  | 3,35E-01 | 6,11E-01 |
| <i>ZCSL3</i>        | -1,05 | 3,35E-01 | 6,11E-01 |
| <i>C4orf19</i>      | -1,11 | 3,35E-01 | 6,11E-01 |
| <i>U21252</i>       | -1,10 | 3,35E-01 | 6,11E-01 |
| <i>HADHSC</i>       | -1,08 | 3,35E-01 | 6,11E-01 |

|                        |       |          |          |
|------------------------|-------|----------|----------|
| <i>KLHDC8B</i>         | -1,06 | 3,35E-01 | 6,11E-01 |
| <i>BI490920</i>        | -1,04 | 3,35E-01 | 6,11E-01 |
| <i>CGN</i>             | -1,04 | 3,35E-01 | 6,11E-01 |
| <i>AY081145</i>        | -1,03 | 3,35E-01 | 6,11E-01 |
| <i>CCDC22</i>          | 1,03  | 3,35E-01 | 6,11E-01 |
| <i>AA427821</i>        | 1,04  | 3,35E-01 | 6,11E-01 |
| <i>A_24_P927254</i>    | 1,04  | 3,35E-01 | 6,11E-01 |
| <i>ENST00000286193</i> | 1,04  | 3,35E-01 | 6,11E-01 |
| <i>C3orf58</i>         | 1,05  | 3,35E-01 | 6,11E-01 |
| <i>CR591764</i>        | 1,06  | 3,35E-01 | 6,11E-01 |
| <i>TREM2</i>           | 1,07  | 3,35E-01 | 6,11E-01 |
| <i>THC2311618</i>      | -1,03 | 3,35E-01 | 6,11E-01 |
| <i>ZNF654</i>          | 1,03  | 3,35E-01 | 6,11E-01 |
| <i>DNPEP</i>           | 1,03  | 3,35E-01 | 6,11E-01 |
| <i>SENP2</i>           | 1,04  | 3,35E-01 | 6,11E-01 |
| <i>THC2303815</i>      | -1,07 | 3,35E-01 | 6,11E-01 |
| <i>ADD1</i>            | -1,04 | 3,35E-01 | 6,11E-01 |
| <i>MYL3</i>            | -1,04 | 3,36E-01 | 6,12E-01 |
| <i>ALPK2</i>           | 1,04  | 3,36E-01 | 6,12E-01 |
| <i>TMEM5</i>           | 1,03  | 3,36E-01 | 6,12E-01 |
| <i>SLC30A3</i>         | 1,08  | 3,36E-01 | 6,12E-01 |
| <i>PUS1</i>            | -1,05 | 3,36E-01 | 6,12E-01 |
| <i>C6orf25</i>         | 1,03  | 3,36E-01 | 6,12E-01 |
| <i>COMMD6</i>          | -1,05 | 3,36E-01 | 6,12E-01 |
| <i>SLC30A9</i>         | -1,04 | 3,36E-01 | 6,12E-01 |
| <i>THC2438936</i>      | -1,04 | 3,36E-01 | 6,12E-01 |
| <i>A_24_P933410</i>    | -1,04 | 3,36E-01 | 6,12E-01 |
| <i>AA975481</i>        | -1,03 | 3,36E-01 | 6,12E-01 |
| <i>FLJ25476</i>        | -1,03 | 3,36E-01 | 6,12E-01 |
| <i>KIAA1524</i>        | -1,03 | 3,36E-01 | 6,12E-01 |
| <i>MUC17</i>           | 1,02  | 3,36E-01 | 6,12E-01 |
| <i>ZIC4</i>            | 1,02  | 3,36E-01 | 6,12E-01 |
| <i>GHITM</i>           | 1,04  | 3,36E-01 | 6,12E-01 |
| <i>U43279</i>          | 1,04  | 3,36E-01 | 6,12E-01 |
| <i>THC2348987</i>      | 1,04  | 3,36E-01 | 6,12E-01 |
| <i>A_24_P798431</i>    | 1,04  | 3,36E-01 | 6,12E-01 |
| <i>GABRG1</i>          | 1,04  | 3,36E-01 | 6,12E-01 |
| <i>A_24_P812172</i>    | 1,05  | 3,36E-01 | 6,12E-01 |
| <i>A_24_P187626</i>    | 1,07  | 3,36E-01 | 6,12E-01 |
| <i>A_24_P541482</i>    | 1,09  | 3,36E-01 | 6,12E-01 |
| <i>LOC389033</i>       | 1,10  | 3,36E-01 | 6,12E-01 |
| <i>A_24_P118541</i>    | -1,03 | 3,36E-01 | 6,12E-01 |
| <i>GE_BrightCorner</i> | 1,05  | 3,36E-01 | 6,12E-01 |
| <i>THC2282735</i>      | 1,03  | 3,36E-01 | 6,12E-01 |

|                        |       |          |          |
|------------------------|-------|----------|----------|
| <i>A_24_P669822</i>    | -1,04 | 3,36E-01 | 6,12E-01 |
| <i>A_23_P64962</i>     | -1,07 | 3,37E-01 | 6,12E-01 |
| <i>LANCL1</i>          | -1,04 | 3,37E-01 | 6,12E-01 |
| <i>C3orf20</i>         | -1,04 | 3,36E-01 | 6,12E-01 |
| <i>BC028591</i>        | -1,04 | 3,37E-01 | 6,12E-01 |
| <i>ENST00000277858</i> | -1,03 | 3,37E-01 | 6,12E-01 |
| <i>THC2306681</i>      | 1,04  | 3,37E-01 | 6,12E-01 |
| <i>KHDRBS2</i>         | 1,08  | 3,37E-01 | 6,12E-01 |
| <i>THC2439490</i>      | -1,03 | 3,37E-01 | 6,12E-01 |
| <i>THC2377365</i>      | -1,04 | 3,37E-01 | 6,13E-01 |
| <i>LOC387856</i>       | -1,04 | 3,37E-01 | 6,13E-01 |
| <i>PAPD4</i>           | -1,03 | 3,37E-01 | 6,13E-01 |
| <i>CENTA1</i>          | 1,03  | 3,37E-01 | 6,13E-01 |
| <i>BX411238</i>        | 1,05  | 3,37E-01 | 6,13E-01 |
| <i>A_24_P936736</i>    | 1,04  | 3,37E-01 | 6,13E-01 |
| <i>ESR1</i>            | -1,10 | 3,37E-01 | 6,13E-01 |
| <i>C16orf45</i>        | -1,06 | 3,37E-01 | 6,13E-01 |
| <i>AI348443</i>        | -1,05 | 3,37E-01 | 6,13E-01 |
| <i>C10orf30</i>        | -1,04 | 3,37E-01 | 6,13E-01 |
| <i>HIPK4</i>           | -1,03 | 3,37E-01 | 6,13E-01 |
| <i>CYP2A6</i>          | 1,08  | 3,37E-01 | 6,13E-01 |
| <i>LCAT</i>            | 1,04  | 3,37E-01 | 6,13E-01 |
| <i>DKFZp667F0711</i>   | -1,04 | 3,37E-01 | 6,13E-01 |
| <i>BIRC8</i>           | 1,04  | 3,37E-01 | 6,13E-01 |
| <i>TMED10</i>          | -1,06 | 3,37E-01 | 6,13E-01 |
| <i>NDUFB4</i>          | 1,03  | 3,37E-01 | 6,13E-01 |
| <i>C20orf79</i>        | 1,03  | 3,37E-01 | 6,13E-01 |
| <i>BC035260</i>        | -1,05 | 3,38E-01 | 6,13E-01 |
| <i>ENST00000357301</i> | -1,04 | 3,38E-01 | 6,13E-01 |
| <i>MGC14436</i>        | 1,03  | 3,38E-01 | 6,13E-01 |
| <i>IFITM5</i>          | 1,06  | 3,38E-01 | 6,13E-01 |
| <i>RIN2</i>            | 1,05  | 3,38E-01 | 6,13E-01 |
| <i>A_23_P335398</i>    | -1,07 | 3,38E-01 | 6,13E-01 |
| <i>ADCY6</i>           | -1,05 | 3,38E-01 | 6,13E-01 |
| <i>AK096498</i>        | -1,04 | 3,38E-01 | 6,13E-01 |
| <i>ENST00000358378</i> | 1,03  | 3,38E-01 | 6,13E-01 |
| <i>CNIH2</i>           | 1,04  | 3,38E-01 | 6,13E-01 |
| <i>PSCD2L</i>          | 1,05  | 3,38E-01 | 6,13E-01 |
| <i>AK128103</i>        | -1,11 | 3,38E-01 | 6,14E-01 |
| <i>A_24_P384220</i>    | -1,04 | 3,38E-01 | 6,14E-01 |
| <i>CDR2L</i>           | 1,04  | 3,38E-01 | 6,14E-01 |
| <i>AF401032</i>        | 1,04  | 3,38E-01 | 6,14E-01 |
| <i>KCNK7</i>           | 1,07  | 3,38E-01 | 6,14E-01 |
| <i>STARD3</i>          | 1,04  | 3,38E-01 | 6,14E-01 |

|                        |       |          |          |
|------------------------|-------|----------|----------|
| <i>OIP5</i>            | -1,05 | 3,38E-01 | 6,14E-01 |
| <i>GPX4</i>            | 1,06  | 3,38E-01 | 6,14E-01 |
| <i>DOM3Z</i>           | -1,03 | 3,38E-01 | 6,14E-01 |
| <i>THC2343350</i>      | 1,03  | 3,38E-01 | 6,14E-01 |
| <i>AK056135</i>        | -1,06 | 3,38E-01 | 6,14E-01 |
| <i>NUSAP1</i>          | -1,04 | 3,38E-01 | 6,14E-01 |
| <i>HMOX1</i>           | 1,13  | 3,38E-01 | 6,14E-01 |
| <i>CD33L3</i>          | 1,04  | 3,38E-01 | 6,14E-01 |
| <i>THC2419134</i>      | -1,06 | 3,38E-01 | 6,14E-01 |
| <i>STARD7</i>          | -1,04 | 3,38E-01 | 6,14E-01 |
| <i>AK026194</i>        | 1,05  | 3,38E-01 | 6,14E-01 |
| <i>A_24_P392099</i>    | 1,05  | 3,38E-01 | 6,14E-01 |
| <i>RLN2</i>            | -1,04 | 3,38E-01 | 6,14E-01 |
| <i>PDCD1LG2</i>        | 1,05  | 3,38E-01 | 6,14E-01 |
| <i>L30117</i>          | 1,03  | 3,39E-01 | 6,14E-01 |
| <i>PSAP</i>            | -1,06 | 3,39E-01 | 6,14E-01 |
| <i>DMRT3</i>           | -1,03 | 3,39E-01 | 6,14E-01 |
| <i>A_24_P943411</i>    | -1,04 | 3,39E-01 | 6,14E-01 |
| <i>ENST00000359236</i> | -1,07 | 3,39E-01 | 6,14E-01 |
| <i>AI690093</i>        | -1,05 | 3,39E-01 | 6,14E-01 |
| <i>LBP</i>             | 1,04  | 3,39E-01 | 6,14E-01 |
| <i>KCNF1</i>           | 1,05  | 3,39E-01 | 6,14E-01 |
| <i>CDIPT</i>           | 1,06  | 3,39E-01 | 6,14E-01 |
| <i>HLA-DQA2</i>        | -1,17 | 3,39E-01 | 6,15E-01 |
| <i>THC2432660</i>      | 1,04  | 3,39E-01 | 6,15E-01 |
| <i>THC2372435</i>      | -1,09 | 3,39E-01 | 6,15E-01 |
| <i>A_24_P685983</i>    | 1,03  | 3,39E-01 | 6,15E-01 |
| <i>MGC39372</i>        | 1,05  | 3,39E-01 | 6,15E-01 |
| <i>STOX1</i>           | 1,07  | 3,39E-01 | 6,15E-01 |
| <i>BF576096</i>        | 1,07  | 3,39E-01 | 6,15E-01 |
| <i>CUTA</i>            | -1,03 | 3,39E-01 | 6,15E-01 |
| <i>BLOC1S2</i>         | 1,04  | 3,39E-01 | 6,15E-01 |
| <i>THC2433670</i>      | -1,04 | 3,39E-01 | 6,15E-01 |
| <i>PCSK5</i>           | 1,09  | 3,39E-01 | 6,15E-01 |
| <i>ENST00000359676</i> | -1,06 | 3,39E-01 | 6,15E-01 |
| <i>AB002439</i>        | 1,04  | 3,39E-01 | 6,15E-01 |
| <i>FLJ21438</i>        | -1,07 | 3,39E-01 | 6,15E-01 |
| <i>MAP3K7IP3</i>       | 1,03  | 3,40E-01 | 6,15E-01 |
| <i>C10orf67</i>        | 1,04  | 3,40E-01 | 6,15E-01 |
| <i>NIP7</i>            | 1,04  | 3,40E-01 | 6,15E-01 |
| <i>BC033184</i>        | 1,06  | 3,40E-01 | 6,15E-01 |
| <i>MSR1</i>            | 1,07  | 3,40E-01 | 6,15E-01 |
| <i>IGSF4B</i>          | 1,13  | 3,40E-01 | 6,15E-01 |
| <i>ENST00000380683</i> | -1,13 | 3,40E-01 | 6,15E-01 |

|                        |       |          |          |
|------------------------|-------|----------|----------|
| <i>A_23_P6514</i>      | -1,09 | 3,40E-01 | 6,15E-01 |
| <i>PAX8</i>            | -1,08 | 3,40E-01 | 6,15E-01 |
| <i>ENST00000379447</i> | -1,03 | 3,40E-01 | 6,15E-01 |
| <i>RC74</i>            | -1,03 | 3,40E-01 | 6,15E-01 |
| <i>A_24_P49267</i>     | 1,03  | 3,40E-01 | 6,15E-01 |
| <i>THC2338537</i>      | 1,05  | 3,40E-01 | 6,15E-01 |
| <i>AI435603</i>        | -1,03 | 3,40E-01 | 6,16E-01 |
| <i>FAM73B</i>          | 1,03  | 3,40E-01 | 6,16E-01 |
| <i>A_24_P212715</i>    | -1,05 | 3,40E-01 | 6,16E-01 |
| <i>ZNF271</i>          | -1,05 | 3,40E-01 | 6,16E-01 |
| <i>BE005242</i>        | -1,08 | 3,40E-01 | 6,16E-01 |
| <i>CNNM1</i>           | -1,07 | 3,40E-01 | 6,16E-01 |
| <i>A_24_P76358</i>     | -1,06 | 3,40E-01 | 6,16E-01 |
| <i>AF090931</i>        | -1,03 | 3,40E-01 | 6,16E-01 |
| <i>AHCTF1</i>          | 1,03  | 3,40E-01 | 6,16E-01 |
| <i>MGC4473</i>         | 1,04  | 3,40E-01 | 6,16E-01 |
| <i>C20orf6</i>         | 1,05  | 3,40E-01 | 6,16E-01 |
| <i>PACIN2</i>          | 1,05  | 3,40E-01 | 6,16E-01 |
| <i>BCAT1</i>           | -1,09 | 3,40E-01 | 6,16E-01 |
| <i>ACTRT2</i>          | -1,05 | 3,40E-01 | 6,16E-01 |
| <i>C1QL3</i>           | 1,04  | 3,41E-01 | 6,16E-01 |
| <i>CD626016</i>        | 1,03  | 3,41E-01 | 6,16E-01 |
| <i>ENST00000297537</i> | 1,03  | 3,41E-01 | 6,16E-01 |
| <i>THC2320455</i>      | 1,04  | 3,41E-01 | 6,16E-01 |
| <i>BF895757</i>        | 1,05  | 3,41E-01 | 6,16E-01 |
| <i>LOX</i>             | 1,15  | 3,41E-01 | 6,16E-01 |
| <i>RPL29</i>           | -1,03 | 3,41E-01 | 6,16E-01 |
| <i>COQ6</i>            | -1,03 | 3,41E-01 | 6,16E-01 |
| <i>KLHL20</i>          | 1,02  | 3,41E-01 | 6,16E-01 |
| <i>A_32_P154956</i>    | -1,07 | 3,41E-01 | 6,16E-01 |
| <i>TRIM38</i>          | -1,03 | 3,41E-01 | 6,16E-01 |
| <i>CLASP2</i>          | -1,04 | 3,41E-01 | 6,16E-01 |
| <i>RNF13</i>           | 1,04  | 3,41E-01 | 6,16E-01 |
| <i>C8orf60</i>         | -1,05 | 3,41E-01 | 6,16E-01 |
| <i>THC2304581</i>      | -1,03 | 3,41E-01 | 6,16E-01 |
| <i>ENST00000330189</i> | 1,04  | 3,41E-01 | 6,16E-01 |
| <i>LOC128439</i>       | -1,03 | 3,41E-01 | 6,17E-01 |
| <i>BTN3A2</i>          | -1,17 | 3,41E-01 | 6,17E-01 |
| <i>A_24_P273033</i>    | -1,03 | 3,41E-01 | 6,17E-01 |
| <i>OR7D4</i>           | 1,04  | 3,41E-01 | 6,17E-01 |
| <i>AA449494</i>        | -1,06 | 3,42E-01 | 6,17E-01 |
| <i>A_24_P238266</i>    | -1,05 | 3,41E-01 | 6,17E-01 |
| <i>MOBKL1A</i>         | -1,04 | 3,42E-01 | 6,17E-01 |
| <i>THC2368590</i>      | 1,03  | 3,41E-01 | 6,17E-01 |



|                 |       |          |          |
|-----------------|-------|----------|----------|
| VPS4A           | 1,04  | 3,41E-01 | 6,17E-01 |
| AF130056        | 1,04  | 3,41E-01 | 6,17E-01 |
| P117            | 1,04  | 3,41E-01 | 6,17E-01 |
| AA765447        | 1,04  | 3,41E-01 | 6,17E-01 |
| PHYHIP          | -1,09 | 3,42E-01 | 6,17E-01 |
| HCFC2           | 1,04  | 3,42E-01 | 6,17E-01 |
| CR603215        | -1,08 | 3,42E-01 | 6,17E-01 |
| BG216680        | -1,05 | 3,42E-01 | 6,17E-01 |
| RNASE3          | -1,04 | 3,42E-01 | 6,17E-01 |
| TAAR5           | 1,03  | 3,42E-01 | 6,17E-01 |
| A_23_P412927    | 1,06  | 3,42E-01 | 6,17E-01 |
| A_24_P522399    | 1,04  | 3,42E-01 | 6,17E-01 |
| PRMT2           | 1,04  | 3,42E-01 | 6,17E-01 |
| ISLR2           | 1,06  | 3,42E-01 | 6,17E-01 |
| HDAC8           | 1,03  | 3,42E-01 | 6,17E-01 |
| ENST00000330227 | -1,04 | 3,42E-01 | 6,17E-01 |
| AGL             | -1,07 | 3,42E-01 | 6,17E-01 |
| THC2273822      | 1,04  | 3,42E-01 | 6,17E-01 |
| TRAF7           | -1,04 | 3,42E-01 | 6,17E-01 |
| A_24_P932710    | 1,04  | 3,42E-01 | 6,17E-01 |
| BTBD11          | 1,13  | 3,42E-01 | 6,17E-01 |
| PAPD1           | -1,04 | 3,42E-01 | 6,17E-01 |
| A_24_P912968    | 1,05  | 3,42E-01 | 6,17E-01 |
| SGCD            | 1,10  | 3,42E-01 | 6,17E-01 |
| CDC20B          | 1,02  | 3,42E-01 | 6,17E-01 |
| AXIN1           | 1,04  | 3,42E-01 | 6,18E-01 |
| GPATC4          | 1,05  | 3,42E-01 | 6,18E-01 |
| KLF16           | 1,06  | 3,42E-01 | 6,18E-01 |
| LOC137886       | -1,07 | 3,43E-01 | 6,18E-01 |
| THC2287125      | 1,04  | 3,43E-01 | 6,18E-01 |
| CR622844        | 1,06  | 3,43E-01 | 6,18E-01 |
| BEX2            | -1,09 | 3,43E-01 | 6,18E-01 |
| AL566169        | 1,03  | 3,43E-01 | 6,18E-01 |
| CD83            | 1,20  | 3,43E-01 | 6,18E-01 |
| CXorf6          | 1,04  | 3,43E-01 | 6,18E-01 |
| CTSB            | -1,08 | 3,43E-01 | 6,18E-01 |
| GPD1            | 1,03  | 3,43E-01 | 6,18E-01 |
| ASGR1           | 1,05  | 3,43E-01 | 6,18E-01 |
| SAMD11          | 1,17  | 3,43E-01 | 6,18E-01 |
| S100A2          | 1,28  | 3,43E-01 | 6,18E-01 |
| RANBP1          | -1,04 | 3,43E-01 | 6,18E-01 |
| DCDC2           | 1,03  | 3,43E-01 | 6,18E-01 |
| THC2376474      | 1,04  | 3,43E-01 | 6,18E-01 |
| A_24_P169493    | -1,03 | 3,43E-01 | 6,18E-01 |

|                        |       |          |          |
|------------------------|-------|----------|----------|
| <i>BRD9</i>            | 1,03  | 3,43E-01 | 6,19E-01 |
| <i>BC034913</i>        | 1,03  | 3,43E-01 | 6,19E-01 |
| <i>MAPKAPK3</i>        | 1,04  | 3,43E-01 | 6,19E-01 |
| <i>UGT2A3</i>          | -1,04 | 3,44E-01 | 6,19E-01 |
| <i>NPSA</i>            | 1,03  | 3,43E-01 | 6,19E-01 |
| <i>AK095102</i>        | 1,04  | 3,43E-01 | 6,19E-01 |
| <i>BFSP2</i>           | -1,04 | 3,44E-01 | 6,19E-01 |
| <i>AA669267</i>        | 1,04  | 3,44E-01 | 6,19E-01 |
| <i>AK098728</i>        | 1,06  | 3,44E-01 | 6,19E-01 |
| <i>FOXRED2</i>         | -1,04 | 3,44E-01 | 6,19E-01 |
| <i>A_24_P727215</i>    | -1,04 | 3,44E-01 | 6,19E-01 |
| <i>CACNA1A</i>         | 1,04  | 3,44E-01 | 6,19E-01 |
| <i>AF318342</i>        | 1,04  | 3,44E-01 | 6,19E-01 |
| <i>ADRA2B</i>          | -1,07 | 3,44E-01 | 6,19E-01 |
| <i>SAR1B</i>           | 1,05  | 3,44E-01 | 6,19E-01 |
| <i>ITIH5</i>           | 1,10  | 3,44E-01 | 6,19E-01 |
| <i>THC2437177</i>      | -1,08 | 3,44E-01 | 6,19E-01 |
| <i>AK001979</i>        | -1,06 | 3,44E-01 | 6,19E-01 |
| <i>A_24_P409166</i>    | -1,03 | 3,44E-01 | 6,19E-01 |
| <i>GCNT1</i>           | -1,05 | 3,44E-01 | 6,19E-01 |
| <i>STAR</i>            | -1,05 | 3,44E-01 | 6,19E-01 |
| <i>A_32_P57002</i>     | -1,05 | 3,44E-01 | 6,19E-01 |
| <i>ENST00000326876</i> | 1,03  | 3,44E-01 | 6,19E-01 |
| <i>FSCN2</i>           | 1,04  | 3,44E-01 | 6,19E-01 |
| <i>GLIS3</i>           | 1,07  | 3,44E-01 | 6,19E-01 |
| <i>FLJ40194</i>        | 1,03  | 3,44E-01 | 6,19E-01 |
| <i>SPINT1</i>          | -1,10 | 3,44E-01 | 6,19E-01 |
| <i>AW337952</i>        | -1,04 | 3,44E-01 | 6,19E-01 |
| <i>KIAA1656</i>        | -1,06 | 3,44E-01 | 6,19E-01 |
| <i>URP2</i>            | -1,05 | 3,44E-01 | 6,19E-01 |
| <i>THC2375612</i>      | -1,05 | 3,44E-01 | 6,19E-01 |
| <i>AK024190</i>        | -1,05 | 3,44E-01 | 6,19E-01 |
| <i>CR603668</i>        | -1,03 | 3,44E-01 | 6,19E-01 |
| <i>A_32_P197476</i>    | 1,03  | 3,44E-01 | 6,19E-01 |
| <i>MGAT3</i>           | 1,03  | 3,44E-01 | 6,19E-01 |
| <i>UPK3B</i>           | 1,04  | 3,44E-01 | 6,19E-01 |
| <i>ETNK2</i>           | -1,04 | 3,45E-01 | 6,19E-01 |
| <i>FLJ14803</i>        | -1,04 | 3,45E-01 | 6,19E-01 |
| <i>A_24_P144084</i>    | -1,02 | 3,45E-01 | 6,19E-01 |
| <i>AL110223</i>        | 1,04  | 3,45E-01 | 6,19E-01 |
| <i>PANK1</i>           | 1,04  | 3,45E-01 | 6,19E-01 |
| <i>ZC3H6</i>           | 1,04  | 3,44E-01 | 6,19E-01 |
| <i>USP5</i>            | 1,05  | 3,45E-01 | 6,19E-01 |
| <i>AY129015</i>        | 1,07  | 3,45E-01 | 6,19E-01 |

|                        |       |          |          |
|------------------------|-------|----------|----------|
| <i>ANXA2P1</i>         | 1,08  | 3,44E-01 | 6,19E-01 |
| <i>BIRC5</i>           | -1,11 | 3,45E-01 | 6,19E-01 |
| <i>LOC285016</i>       | -1,18 | 3,45E-01 | 6,19E-01 |
| <i>KCNRG</i>           | -1,04 | 3,45E-01 | 6,19E-01 |
| <i>SERPINF2</i>        | -1,03 | 3,45E-01 | 6,19E-01 |
| <i>ENST00000359495</i> | -1,03 | 3,45E-01 | 6,19E-01 |
| <i>CARHSP1</i>         | 1,07  | 3,45E-01 | 6,19E-01 |
| <i>TMEM119</i>         | -1,08 | 3,45E-01 | 6,19E-01 |
| <i>A_32_P75311</i>     | -1,06 | 3,45E-01 | 6,19E-01 |
| <i>LRRC56</i>          | -1,04 | 3,45E-01 | 6,19E-01 |
| <i>RILP</i>            | -1,03 | 3,45E-01 | 6,19E-01 |
| <i>AK021686</i>        | 1,03  | 3,45E-01 | 6,19E-01 |
| <i>C8orf12</i>         | 1,04  | 3,45E-01 | 6,20E-01 |
| <i>A_24_P101879</i>    | 1,04  | 3,45E-01 | 6,20E-01 |
| <i>AK027211</i>        | -1,07 | 3,45E-01 | 6,20E-01 |
| <i>A_24_P915107</i>    | -1,04 | 3,45E-01 | 6,20E-01 |
| <i>RAB9B</i>           | 1,07  | 3,45E-01 | 6,20E-01 |
| <i>A_24_P332364</i>    | 1,04  | 3,45E-01 | 6,20E-01 |
| <i>NIPSNAP3A</i>       | -1,07 | 3,45E-01 | 6,20E-01 |
| <i>C17orf56</i>        | -1,05 | 3,45E-01 | 6,20E-01 |
| <i>ZNF438</i>          | 1,03  | 3,45E-01 | 6,20E-01 |
| <i>SLU7</i>            | 1,03  | 3,45E-01 | 6,20E-01 |
| <i>GALR3</i>           | 1,05  | 3,45E-01 | 6,20E-01 |
| <i>LOC220906</i>       | -1,04 | 3,45E-01 | 6,20E-01 |
| <i>CSNK1A1L</i>        | 1,11  | 3,45E-01 | 6,20E-01 |
| <i>RP11-82K18.3</i>    | -1,03 | 3,46E-01 | 6,20E-01 |
| <i>CR606809</i>        | -1,05 | 3,46E-01 | 6,20E-01 |
| <i>AK094571</i>        | -1,03 | 3,46E-01 | 6,20E-01 |
| <i>TTC3</i>            | -1,05 | 3,46E-01 | 6,20E-01 |
| <i>THC2438492</i>      | -1,04 | 3,46E-01 | 6,20E-01 |
| <i>AURKAIP1</i>        | 1,03  | 3,46E-01 | 6,21E-01 |
| <i>FBXW10</i>          | -1,03 | 3,46E-01 | 6,21E-01 |
| <i>AY129023</i>        | -1,04 | 3,46E-01 | 6,21E-01 |
| <i>CDCA5</i>           | -1,05 | 3,46E-01 | 6,21E-01 |
| <i>BC031872</i>        | 1,03  | 3,46E-01 | 6,21E-01 |
| <i>LOC645249</i>       | 1,04  | 3,46E-01 | 6,21E-01 |
| <i>THC2409364</i>      | 1,05  | 3,46E-01 | 6,21E-01 |
| <i>LRR1Q1</i>          | -1,05 | 3,46E-01 | 6,21E-01 |
| <i>WDR1</i>            | 1,06  | 3,46E-01 | 6,21E-01 |
| <i>CAMKK1</i>          | 1,09  | 3,46E-01 | 6,21E-01 |
| <i>FAM43A</i>          | 1,06  | 3,47E-01 | 6,21E-01 |
| <i>A_24_P911411</i>    | -1,03 | 3,47E-01 | 6,21E-01 |
| <i>AK091335</i>        | -1,08 | 3,47E-01 | 6,21E-01 |
| <i>TRIM24</i>          | -1,04 | 3,47E-01 | 6,21E-01 |

|                        |       |          |          |
|------------------------|-------|----------|----------|
| <i>ENST00000361278</i> | -1,03 | 3,47E-01 | 6,21E-01 |
| <i>ANKHD1</i>          | -1,03 | 3,47E-01 | 6,21E-01 |
| <i>A_23_P47546</i>     | 1,03  | 3,47E-01 | 6,21E-01 |
| <i>AF130053</i>        | 1,04  | 3,47E-01 | 6,21E-01 |
| <i>A_24_P290114</i>    | 1,04  | 3,47E-01 | 6,21E-01 |
| <i>ADRA2A</i>          | 1,11  | 3,47E-01 | 6,21E-01 |
| <i>VPS39</i>           | 1,03  | 3,47E-01 | 6,21E-01 |
| <i>C19orf28</i>        | 1,05  | 3,47E-01 | 6,22E-01 |
| <i>CCDC13</i>          | -1,04 | 3,47E-01 | 6,22E-01 |
| <i>A_24_P928453</i>    | 1,03  | 3,47E-01 | 6,22E-01 |
| <i>IFNA4</i>           | 1,04  | 3,47E-01 | 6,22E-01 |
| <i>RNF11</i>           | 1,04  | 3,47E-01 | 6,22E-01 |
| <i>A_24_P178415</i>    | 1,04  | 3,47E-01 | 6,22E-01 |
| <i>CG018</i>           | 1,07  | 3,47E-01 | 6,22E-01 |
| <i>THC2428713</i>      | 1,12  | 3,47E-01 | 6,22E-01 |
| <i>A_24_P657695</i>    | 1,04  | 3,47E-01 | 6,22E-01 |
| <i>UPK1A</i>           | -1,13 | 3,47E-01 | 6,22E-01 |
| <i>ENST00000380946</i> | -1,08 | 3,47E-01 | 6,22E-01 |
| <i>AK024171</i>        | -1,05 | 3,47E-01 | 6,22E-01 |
| <i>THC2430394</i>      | -1,04 | 3,47E-01 | 6,22E-01 |
| <i>PTPRS</i>           | -1,04 | 3,47E-01 | 6,22E-01 |
| <i>A_24_P281730</i>    | -1,03 | 3,47E-01 | 6,22E-01 |
| <i>T71274</i>          | 1,04  | 3,47E-01 | 6,22E-01 |
| <i>NXF3</i>            | 1,05  | 3,47E-01 | 6,22E-01 |
| <i>AI954795</i>        | 1,03  | 3,47E-01 | 6,22E-01 |
| <i>AA902595</i>        | 1,03  | 3,48E-01 | 6,22E-01 |
| <i>UGCGL1</i>          | 1,06  | 3,48E-01 | 6,22E-01 |
| <i>BE004814</i>        | 1,09  | 3,47E-01 | 6,22E-01 |
| <i>NR1D1</i>           | -1,18 | 3,48E-01 | 6,22E-01 |
| <i>GAL</i>             | -1,19 | 3,48E-01 | 6,22E-01 |
| <i>L06522</i>          | -1,04 | 3,48E-01 | 6,22E-01 |
| <i>A_24_P657629</i>    | -1,03 | 3,48E-01 | 6,22E-01 |
| <i>SCG3</i>            | 1,06  | 3,48E-01 | 6,22E-01 |
| <i>SFT2D2</i>          | -1,03 | 3,48E-01 | 6,22E-01 |
| <i>RPS19BP1</i>        | -1,03 | 3,48E-01 | 6,22E-01 |
| <i>IL1F10</i>          | 1,04  | 3,48E-01 | 6,22E-01 |
| <i>BHMT</i>            | -1,03 | 3,48E-01 | 6,23E-01 |
| <i>HDGFL1</i>          | 1,03  | 3,48E-01 | 6,23E-01 |
| <i>LOC152024</i>       | -1,04 | 3,48E-01 | 6,23E-01 |
| <i>MAP3K3</i>          | 1,04  | 3,48E-01 | 6,23E-01 |
| <i>DBI</i>             | 1,07  | 3,48E-01 | 6,23E-01 |
| <i>LOC286149</i>       | -1,03 | 3,48E-01 | 6,23E-01 |
| <i>CTRB1</i>           | -1,05 | 3,48E-01 | 6,23E-01 |
| <i>LTB4DH</i>          | -1,05 | 3,48E-01 | 6,23E-01 |

|                 |       |          |          |
|-----------------|-------|----------|----------|
| SLC28A3         | -1,03 | 3,48E-01 | 6,23E-01 |
| RABL4           | 1,05  | 3,48E-01 | 6,23E-01 |
| ENST00000360934 | -1,07 | 3,48E-01 | 6,23E-01 |
| A_24_P927770    | 1,03  | 3,48E-01 | 6,23E-01 |
| OAZ1            | -1,05 | 3,49E-01 | 6,23E-01 |
| THC2345433      | -1,05 | 3,49E-01 | 6,23E-01 |
| A_32_P169915    | -1,04 | 3,49E-01 | 6,23E-01 |
| TMEM109         | -1,04 | 3,49E-01 | 6,23E-01 |
| LOC152586       | 1,04  | 3,49E-01 | 6,23E-01 |
| AK123438        | -1,03 | 3,49E-01 | 6,23E-01 |
| SFRS8           | -1,03 | 3,49E-01 | 6,23E-01 |
| NDUFB8          | 1,04  | 3,49E-01 | 6,23E-01 |
| A_23_P156609    | -1,05 | 3,49E-01 | 6,23E-01 |
| RPL35           | -1,03 | 3,49E-01 | 6,23E-01 |
| HSPB6           | -1,08 | 3,49E-01 | 6,23E-01 |
| ENST00000371847 | -1,04 | 3,49E-01 | 6,23E-01 |
| PPGB            | 1,03  | 3,49E-01 | 6,23E-01 |
| THC2285742      | 1,04  | 3,49E-01 | 6,23E-01 |
| A_24_P922613    | 1,04  | 3,49E-01 | 6,23E-01 |
| THC2432851      | -1,04 | 3,49E-01 | 6,23E-01 |
| PYDC1           | -1,04 | 3,49E-01 | 6,23E-01 |
| CALM2           | 1,06  | 3,49E-01 | 6,23E-01 |
| ABCA6           | -1,13 | 3,49E-01 | 6,24E-01 |
| A_24_P221057    | -1,03 | 3,49E-01 | 6,24E-01 |
| ENST00000316294 | 1,04  | 3,49E-01 | 6,24E-01 |
| SMPD2           | 1,04  | 3,49E-01 | 6,24E-01 |
| RNF144          | -1,07 | 3,49E-01 | 6,24E-01 |
| LOC196463       | -1,05 | 3,49E-01 | 6,24E-01 |
| THC2339285      | -1,04 | 3,49E-01 | 6,24E-01 |
| LOC285389       | -1,04 | 3,49E-01 | 6,24E-01 |
| RNF167          | -1,03 | 3,49E-01 | 6,24E-01 |
| SLC4A1AP        | -1,03 | 3,49E-01 | 6,24E-01 |
| MC2R            | 1,02  | 3,49E-01 | 6,24E-01 |
| METT10D         | 1,03  | 3,49E-01 | 6,24E-01 |
| SLC25A19        | 1,03  | 3,49E-01 | 6,24E-01 |
| LOC151300       | 1,04  | 3,49E-01 | 6,24E-01 |
| AK057935        | 1,04  | 3,49E-01 | 6,24E-01 |
| SPAG5           | -1,05 | 3,50E-01 | 6,24E-01 |
| THC2249515      | -1,03 | 3,50E-01 | 6,24E-01 |
| AL583429        | 1,04  | 3,50E-01 | 6,24E-01 |
| LOC219731       | -1,06 | 3,50E-01 | 6,24E-01 |
| ENST00000367994 | -1,10 | 3,50E-01 | 6,24E-01 |
| THC2376431      | 1,04  | 3,50E-01 | 6,24E-01 |
| ELOVL4          | 1,04  | 3,50E-01 | 6,24E-01 |

|                        |       |          |          |
|------------------------|-------|----------|----------|
| <i>SYCP3</i>           | -1,04 | 3,50E-01 | 6,24E-01 |
| <i>FGF14</i>           | 1,04  | 3,50E-01 | 6,24E-01 |
| <i>A_24_P109973</i>    | -1,03 | 3,50E-01 | 6,24E-01 |
| <i>ENST00000375587</i> | 1,05  | 3,50E-01 | 6,24E-01 |
| <i>BC007809</i>        | 1,04  | 3,50E-01 | 6,24E-01 |
| <i>BX092917</i>        | -1,05 | 3,50E-01 | 6,24E-01 |
| <i>AK098427</i>        | -1,03 | 3,50E-01 | 6,24E-01 |
| <i>ENST00000380334</i> | 1,04  | 3,50E-01 | 6,24E-01 |
| <i>MUC15</i>           | -1,09 | 3,50E-01 | 6,24E-01 |
| <i>JMJD2C</i>          | -1,05 | 3,50E-01 | 6,24E-01 |
| <i>ENST00000377163</i> | 1,03  | 3,50E-01 | 6,24E-01 |
| <i>SPSB4</i>           | 1,07  | 3,50E-01 | 6,24E-01 |
| <i>IDI1</i>            | 1,08  | 3,50E-01 | 6,24E-01 |
| <i>PSMD4</i>           | 1,03  | 3,50E-01 | 6,24E-01 |
| <i>FEZ2</i>            | 1,04  | 3,50E-01 | 6,24E-01 |
| <i>DKFZp434L192</i>    | -1,03 | 3,50E-01 | 6,24E-01 |
| <i>A_24_P654649</i>    | -1,04 | 3,51E-01 | 6,25E-01 |
| <i>C20orf43</i>        | 1,03  | 3,51E-01 | 6,25E-01 |
| <i>SLC25A14</i>        | 1,03  | 3,51E-01 | 6,25E-01 |
| <i>ENST00000303909</i> | -1,04 | 3,51E-01 | 6,25E-01 |
| <i>EPS8</i>            | 1,07  | 3,51E-01 | 6,25E-01 |
| <i>THC2440487</i>      | 1,04  | 3,51E-01 | 6,25E-01 |
| <i>A_32_P147734</i>    | -1,04 | 3,51E-01 | 6,25E-01 |
| <i>PSMB1</i>           | 1,03  | 3,51E-01 | 6,25E-01 |
| <i>PLCL1</i>           | 1,11  | 3,51E-01 | 6,25E-01 |
| <i>ACTRT1</i>          | 1,10  | 3,51E-01 | 6,25E-01 |
| <i>TRAT1</i>           | -1,05 | 3,51E-01 | 6,25E-01 |
| <i>ENST00000326140</i> | -1,04 | 3,51E-01 | 6,25E-01 |
| <i>A_24_P929678</i>    | 1,04  | 3,51E-01 | 6,25E-01 |
| <i>A_24_P93111</i>     | 1,03  | 3,51E-01 | 6,25E-01 |
| <i>PPM1J</i>           | 1,04  | 3,51E-01 | 6,25E-01 |
| <i>THC2434975</i>      | -1,08 | 3,51E-01 | 6,25E-01 |
| <i>PPIAL4</i>          | 1,04  | 3,51E-01 | 6,25E-01 |
| <i>CLEC2L</i>          | -1,04 | 3,51E-01 | 6,25E-01 |
| <i>A_24_P938254</i>    | -1,05 | 3,52E-01 | 6,26E-01 |
| <i>TEDDM1</i>          | -1,03 | 3,52E-01 | 6,26E-01 |
| <i>C15orf23</i>        | -1,07 | 3,52E-01 | 6,26E-01 |
| <i>GLRA2</i>           | 1,04  | 3,52E-01 | 6,26E-01 |
| <i>THC2392192</i>      | 1,06  | 3,52E-01 | 6,26E-01 |
| <i>FUT11</i>           | 1,04  | 3,52E-01 | 6,26E-01 |
| <i>EIF2B3</i>          | -1,04 | 3,52E-01 | 6,26E-01 |
| <i>THC2280833</i>      | -1,05 | 3,52E-01 | 6,27E-01 |
| <i>SDR-O</i>           | -1,05 | 3,52E-01 | 6,27E-01 |
| <i>PMP22CD</i>         | 1,03  | 3,52E-01 | 6,27E-01 |

|                     |       |          |          |
|---------------------|-------|----------|----------|
| <i>A_32_P149735</i> | -1,09 | 3,52E-01 | 6,27E-01 |
| <i>NEK11</i>        | -1,05 | 3,52E-01 | 6,27E-01 |
| <i>XO5126</i>       | 1,05  | 3,52E-01 | 6,27E-01 |
| <i>STEAP4</i>       | 1,14  | 3,52E-01 | 6,27E-01 |
| <i>DNASE1</i>       | -1,04 | 3,52E-01 | 6,27E-01 |
| <i>CEP70</i>        | 1,04  | 3,52E-01 | 6,27E-01 |
| <i>HIST1H3D</i>     | -1,06 | 3,52E-01 | 6,27E-01 |
| <i>GRINA</i>        | -1,06 | 3,53E-01 | 6,27E-01 |
| <i>ADC</i>          | -1,06 | 3,53E-01 | 6,27E-01 |
| <i>FCHO1</i>        | -1,05 | 3,53E-01 | 6,27E-01 |
| <i>HIST1H2BL</i>    | -1,04 | 3,53E-01 | 6,27E-01 |
| <i>AW269773</i>     | -1,04 | 3,53E-01 | 6,27E-01 |
| <i>A_24_P32207</i>  | 1,04  | 3,53E-01 | 6,27E-01 |
| <i>THC2326212</i>   | -1,03 | 3,53E-01 | 6,27E-01 |
| <i>C21orf121</i>    | 1,03  | 3,53E-01 | 6,27E-01 |
| <i>EVPL</i>         | 1,05  | 3,53E-01 | 6,27E-01 |
| <i>TGFB1</i>        | 1,04  | 3,53E-01 | 6,27E-01 |
| <i>HTF9C</i>        | -1,03 | 3,53E-01 | 6,27E-01 |
| <i>THC2345392</i>   | 1,04  | 3,53E-01 | 6,27E-01 |
| <i>A_24_P581618</i> | 1,05  | 3,53E-01 | 6,27E-01 |
| <i>STC2</i>         | 1,09  | 3,53E-01 | 6,27E-01 |
| <i>ZNF718</i>       | -1,07 | 3,53E-01 | 6,27E-01 |
| <i>THC2261358</i>   | -1,05 | 3,53E-01 | 6,27E-01 |
| <i>THC2341662</i>   | 1,04  | 3,53E-01 | 6,27E-01 |
| <i>OR10C1</i>       | -1,04 | 3,53E-01 | 6,27E-01 |
| <i>AL117652</i>     | 1,03  | 3,53E-01 | 6,27E-01 |
| <i>REXO2</i>        | -1,06 | 3,53E-01 | 6,27E-01 |
| <i>CXCL13</i>       | -1,16 | 3,53E-01 | 6,28E-01 |
| <i>AK024926</i>     | -1,06 | 3,53E-01 | 6,28E-01 |
| <i>FLJ31222</i>     | -1,03 | 3,53E-01 | 6,28E-01 |
| <i>BC008091</i>     | 1,03  | 3,53E-01 | 6,28E-01 |
| <i>C2orf4</i>       | -1,04 | 3,54E-01 | 6,28E-01 |
| <i>BCAN</i>         | 1,04  | 3,54E-01 | 6,28E-01 |
| <i>AU144005</i>     | 1,04  | 3,54E-01 | 6,28E-01 |
| <i>THC2441284</i>   | 1,04  | 3,54E-01 | 6,28E-01 |
| <i>MAP3K5</i>       | 1,09  | 3,54E-01 | 6,28E-01 |
| <i>AK123143</i>     | -1,04 | 3,54E-01 | 6,28E-01 |
| <i>POLD1</i>        | -1,03 | 3,54E-01 | 6,28E-01 |
| <i>A_32_P22989</i>  | -1,06 | 3,54E-01 | 6,28E-01 |
| <i>NUP37</i>        | -1,03 | 3,54E-01 | 6,28E-01 |
| <i>A_24_P921871</i> | -1,04 | 3,54E-01 | 6,28E-01 |
| <i>GNGT1</i>        | 1,03  | 3,54E-01 | 6,28E-01 |
| <i>MGC16597</i>     | -1,03 | 3,54E-01 | 6,28E-01 |
| <i>BC034306</i>     | 1,03  | 3,54E-01 | 6,28E-01 |

|                        |       |          |          |
|------------------------|-------|----------|----------|
| <i>LOC643774</i>       | 1,04  | 3,54E-01 | 6,28E-01 |
| <i>SLC5A3</i>          | 1,07  | 3,54E-01 | 6,29E-01 |
| <i>BC043283</i>        | 1,03  | 3,54E-01 | 6,29E-01 |
| <i>AK124256</i>        | -1,05 | 3,54E-01 | 6,29E-01 |
| <i>GPR42</i>           | 1,02  | 3,55E-01 | 6,29E-01 |
| <i>CLCC1</i>           | 1,03  | 3,55E-01 | 6,29E-01 |
| <i>DKFZp761P0212</i>   | 1,05  | 3,55E-01 | 6,29E-01 |
| <i>AK098270</i>        | -1,04 | 3,55E-01 | 6,29E-01 |
| <i>HMBS</i>            | -1,10 | 3,55E-01 | 6,29E-01 |
| <i>PNPLA7</i>          | -1,07 | 3,55E-01 | 6,29E-01 |
| <i>ERBB2IP</i>         | -1,05 | 3,55E-01 | 6,29E-01 |
| <i>CHST10</i>          | -1,04 | 3,55E-01 | 6,29E-01 |
| <i>LOC338756</i>       | -1,03 | 3,55E-01 | 6,29E-01 |
| <i>ENST00000340515</i> | 1,03  | 3,55E-01 | 6,29E-01 |
| <i>A_24_P565496</i>    | 1,04  | 3,55E-01 | 6,29E-01 |
| <i>XPO6</i>            | 1,04  | 3,55E-01 | 6,29E-01 |
| <i>FLJ33630</i>        | 1,05  | 3,55E-01 | 6,29E-01 |
| <i>A_32_P69987</i>     | 1,05  | 3,55E-01 | 6,29E-01 |
| <i>CA11</i>            | 1,09  | 3,55E-01 | 6,29E-01 |
| <i>THC2430400</i>      | 1,05  | 3,55E-01 | 6,29E-01 |
| <i>LOC151146</i>       | 1,03  | 3,55E-01 | 6,29E-01 |
| <i>THC2361461</i>      | -1,06 | 3,55E-01 | 6,29E-01 |
| <i>CEACAM8</i>         | 1,04  | 3,55E-01 | 6,29E-01 |
| <i>DBX2</i>            | 1,04  | 3,55E-01 | 6,30E-01 |
| <i>NFYB</i>            | -1,03 | 3,55E-01 | 6,30E-01 |
| <i>LOC283953</i>       | 1,04  | 3,55E-01 | 6,30E-01 |
| <i>A_24_P366546</i>    | -1,04 | 3,56E-01 | 6,30E-01 |
| <i>LOC644011</i>       | -1,04 | 3,56E-01 | 6,30E-01 |
| <i>EIF3S7</i>          | -1,03 | 3,56E-01 | 6,30E-01 |
| <i>THC2315174</i>      | 1,03  | 3,56E-01 | 6,30E-01 |
| <i>LOC647460</i>       | -1,09 | 3,56E-01 | 6,30E-01 |
| <i>FKBP4</i>           | 1,04  | 3,56E-01 | 6,30E-01 |
| <i>TOPBP1</i>          | 1,05  | 3,56E-01 | 6,30E-01 |
| <i>KIAA1797</i>        | -1,04 | 3,56E-01 | 6,30E-01 |
| <i>DIAPH3</i>          | 1,03  | 3,56E-01 | 6,30E-01 |
| <i>BC047077</i>        | -1,04 | 3,56E-01 | 6,30E-01 |
| <i>C2orf30</i>         | -1,05 | 3,56E-01 | 6,30E-01 |
| <i>BI047192</i>        | -1,04 | 3,56E-01 | 6,31E-01 |
| <i>VDAC2</i>           | 1,04  | 3,56E-01 | 6,31E-01 |
| <i>THC2397609</i>      | 1,05  | 3,56E-01 | 6,31E-01 |
| <i>A_32_P163472</i>    | -1,05 | 3,56E-01 | 6,31E-01 |
| <i>YY1</i>             | -1,03 | 3,56E-01 | 6,31E-01 |
| <i>BC043218</i>        | -1,03 | 3,56E-01 | 6,31E-01 |
| <i>RP1-32F7.2</i>      | -1,09 | 3,56E-01 | 6,31E-01 |



|                        |       |          |          |
|------------------------|-------|----------|----------|
| <i>MBD3L1</i>          | 1,05  | 3,56E-01 | 6,31E-01 |
| <i>LOC650938</i>       | -1,05 | 3,57E-01 | 6,31E-01 |
| <i>ZCCHC14</i>         | -1,03 | 3,57E-01 | 6,31E-01 |
| <i>UXT</i>             | 1,03  | 3,57E-01 | 6,31E-01 |
| <i>ALDH1L2</i>         | -1,10 | 3,57E-01 | 6,31E-01 |
| <i>ENST00000242224</i> | 1,04  | 3,57E-01 | 6,31E-01 |
| <i>TMEM102</i>         | 1,04  | 3,57E-01 | 6,31E-01 |
| <i>ENTPD8</i>          | -1,03 | 3,57E-01 | 6,31E-01 |
| <i>A_23_P27460</i>     | 1,03  | 3,57E-01 | 6,32E-01 |
| <i>A_24_P933259</i>    | 1,03  | 3,57E-01 | 6,32E-01 |
| <i>SEC23B</i>          | -1,06 | 3,57E-01 | 6,32E-01 |
| <i>CPSF3</i>           | -1,04 | 3,57E-01 | 6,32E-01 |
| <i>HLA-DOB</i>         | -1,04 | 3,57E-01 | 6,32E-01 |
| <i>AA020958</i>        | -1,04 | 3,57E-01 | 6,32E-01 |
| <i>CR603272</i>        | -1,04 | 3,57E-01 | 6,32E-01 |
| <i>THC2311764</i>      | -1,03 | 3,57E-01 | 6,32E-01 |
| <i>ANAPC10</i>         | 1,03  | 3,57E-01 | 6,32E-01 |
| <i>BC022826</i>        | 1,06  | 3,57E-01 | 6,32E-01 |
| <i>PLEKHN1</i>         | 1,07  | 3,57E-01 | 6,32E-01 |
| <i>RGS6</i>            | 1,07  | 3,57E-01 | 6,32E-01 |
| <i>PI15</i>            | 1,18  | 3,57E-01 | 6,32E-01 |
| <i>CDYL</i>            | -1,04 | 3,57E-01 | 6,32E-01 |
| <i>MTHFD1</i>          | -1,04 | 3,57E-01 | 6,32E-01 |
| <i>C17orf66</i>        | 1,03  | 3,57E-01 | 6,32E-01 |
| <i>THC2431327</i>      | 1,04  | 3,57E-01 | 6,32E-01 |
| <i>SYNJ2</i>           | 1,06  | 3,57E-01 | 6,32E-01 |
| <i>THC2307660</i>      | 1,04  | 3,58E-01 | 6,32E-01 |
| <i>THC2440991</i>      | 1,04  | 3,58E-01 | 6,32E-01 |
| <i>SLC11A2</i>         | -1,03 | 3,58E-01 | 6,32E-01 |
| <i>SBK1</i>            | 1,03  | 3,58E-01 | 6,32E-01 |
| <i>ARPC2</i>           | 1,03  | 3,58E-01 | 6,32E-01 |
| <i>BC043527</i>        | -1,04 | 3,58E-01 | 6,32E-01 |
| <i>ENST00000306716</i> | 1,05  | 3,58E-01 | 6,32E-01 |
| <i>FLJ44451</i>        | -1,03 | 3,58E-01 | 6,32E-01 |
| <i>AK021616</i>        | 1,03  | 3,58E-01 | 6,32E-01 |
| <i>CUL2</i>            | -1,06 | 3,58E-01 | 6,32E-01 |
| <i>OR1A2</i>           | -1,04 | 3,58E-01 | 6,32E-01 |
| <i>H11348</i>          | 1,05  | 3,58E-01 | 6,32E-01 |
| <i>BC000604</i>        | 1,03  | 3,58E-01 | 6,32E-01 |
| <i>POU3F4</i>          | 1,04  | 3,58E-01 | 6,32E-01 |
| <i>C1orf177</i>        | 1,04  | 3,58E-01 | 6,32E-01 |
| <i>THC2420896</i>      | 1,04  | 3,58E-01 | 6,32E-01 |
| <i>ENST00000330251</i> | 1,06  | 3,58E-01 | 6,32E-01 |
| <i>NOD9</i>            | -1,06 | 3,58E-01 | 6,32E-01 |

|                        |       |          |          |
|------------------------|-------|----------|----------|
| <i>STXBP4</i>          | -1,06 | 3,58E-01 | 6,32E-01 |
| <i>BE672559</i>        | 1,03  | 3,58E-01 | 6,32E-01 |
| <i>C7orf9</i>          | 1,03  | 3,58E-01 | 6,32E-01 |
| <i>C10orf11</i>        | 1,04  | 3,58E-01 | 6,32E-01 |
| <i>A_32_P114914</i>    | -1,04 | 3,58E-01 | 6,32E-01 |
| <i>KIFC2</i>           | 1,04  | 3,58E-01 | 6,32E-01 |
| <i>LOC643988</i>       | -1,07 | 3,58E-01 | 6,33E-01 |
| <i>TUBGCP3</i>         | 1,03  | 3,58E-01 | 6,33E-01 |
| <i>FLJ10925</i>        | 1,04  | 3,58E-01 | 6,33E-01 |
| <i>GNA15</i>           | 1,05  | 3,59E-01 | 6,33E-01 |
| <i>CDH18</i>           | 1,19  | 3,59E-01 | 6,33E-01 |
| <i>SLC16A8</i>         | 1,04  | 3,59E-01 | 6,33E-01 |
| <i>A_24_P938006</i>    | -1,06 | 3,59E-01 | 6,33E-01 |
| <i>LOC286359</i>       | -1,04 | 3,59E-01 | 6,33E-01 |
| <i>SHH</i>             | -1,03 | 3,59E-01 | 6,33E-01 |
| <i>A_24_P931905</i>    | 1,03  | 3,59E-01 | 6,33E-01 |
| <i>ENST00000358984</i> | 1,04  | 3,59E-01 | 6,33E-01 |
| <i>THC2429187</i>      | -1,03 | 3,59E-01 | 6,33E-01 |
| <i>CDC2L2</i>          | -1,05 | 3,59E-01 | 6,33E-01 |
| <i>LOC283481</i>       | 1,06  | 3,59E-01 | 6,33E-01 |
| <i>ALG10</i>           | -1,03 | 3,59E-01 | 6,33E-01 |
| <i>A_24_P170203</i>    | -1,03 | 3,59E-01 | 6,33E-01 |
| <i>ZFP28</i>           | -1,03 | 3,59E-01 | 6,33E-01 |
| <i>GYLTL1B</i>         | 1,03  | 3,59E-01 | 6,33E-01 |
| <i>IL4I1</i>           | 1,08  | 3,59E-01 | 6,34E-01 |
| <i>ENST00000379872</i> | -1,05 | 3,59E-01 | 6,34E-01 |
| <i>THC2447037</i>      | -1,10 | 3,59E-01 | 6,34E-01 |
| <i>A_24_P562692</i>    | -1,04 | 3,60E-01 | 6,34E-01 |
| <i>GATAD2A</i>         | 1,03  | 3,60E-01 | 6,34E-01 |
| <i>TEK</i>             | 1,07  | 3,60E-01 | 6,34E-01 |
| <i>LOC642299</i>       | -1,04 | 3,60E-01 | 6,34E-01 |
| <i>DPT</i>             | -1,16 | 3,60E-01 | 6,34E-01 |
| <i>ALS2CR4</i>         | -1,04 | 3,60E-01 | 6,34E-01 |
| <i>PREX1</i>           | 1,05  | 3,60E-01 | 6,34E-01 |
| <i>FGF2</i>            | 1,04  | 3,60E-01 | 6,34E-01 |
| <i>ENST00000372127</i> | -1,03 | 3,60E-01 | 6,34E-01 |
| <i>ODAM</i>            | 1,03  | 3,60E-01 | 6,34E-01 |
| <i>BC020911</i>        | -1,07 | 3,60E-01 | 6,34E-01 |
| <i>RNF128</i>          | 1,03  | 3,60E-01 | 6,34E-01 |
| <i>T33495</i>          | 1,05  | 3,60E-01 | 6,34E-01 |
| <i>IL17D</i>           | 1,10  | 3,60E-01 | 6,34E-01 |
| <i>THC2305638</i>      | -1,05 | 3,60E-01 | 6,34E-01 |
| <i>AT_W_5</i>          | 1,02  | 3,60E-01 | 6,34E-01 |
| <i>IQCF1</i>           | 1,03  | 3,60E-01 | 6,34E-01 |

|                        |       |          |          |
|------------------------|-------|----------|----------|
| <i>A_24_P931272</i>    | 1,04  | 3,60E-01 | 6,35E-01 |
| <i>A_24_P324644</i>    | -1,04 | 3,60E-01 | 6,35E-01 |
| <i>FAM69B</i>          | -1,04 | 3,60E-01 | 6,35E-01 |
| <i>LOC51145</i>        | -1,03 | 3,60E-01 | 6,35E-01 |
| <i>LOC441204</i>       | 1,04  | 3,60E-01 | 6,35E-01 |
| <i>LOC642864</i>       | 1,04  | 3,60E-01 | 6,35E-01 |
| <i>BC031974</i>        | 1,07  | 3,60E-01 | 6,35E-01 |
| <i>CYP2C19</i>         | -1,04 | 3,60E-01 | 6,35E-01 |
| <i>PRSS22</i>          | -1,07 | 3,61E-01 | 6,35E-01 |
| <i>ENST00000376974</i> | -1,03 | 3,61E-01 | 6,35E-01 |
| <i>A_32_P218131</i>    | 1,03  | 3,61E-01 | 6,35E-01 |
| <i>MADD</i>            | 1,04  | 3,61E-01 | 6,35E-01 |
| <i>MCPH1</i>           | 1,04  | 3,61E-01 | 6,35E-01 |
| <i>SLC6A1</i>          | 1,05  | 3,61E-01 | 6,35E-01 |
| <i>A_24_P917199</i>    | 1,03  | 3,61E-01 | 6,35E-01 |
| <i>PRRT1</i>           | 1,04  | 3,61E-01 | 6,35E-01 |
| <i>TSPAN18</i>         | 1,10  | 3,61E-01 | 6,35E-01 |
| <i>THC2355824</i>      | 1,03  | 3,61E-01 | 6,35E-01 |
| <i>ING3</i>            | 1,03  | 3,61E-01 | 6,35E-01 |
| <i>THC2320128</i>      | 1,05  | 3,61E-01 | 6,35E-01 |
| <i>THC2301753</i>      | 1,03  | 3,61E-01 | 6,35E-01 |
| <i>ENST00000341824</i> | 1,12  | 3,61E-01 | 6,35E-01 |
| <i>SERPINE2</i>        | 1,20  | 3,61E-01 | 6,35E-01 |
| <i>AK093872</i>        | -1,05 | 3,61E-01 | 6,36E-01 |
| <i>DSTN</i>            | 1,11  | 3,61E-01 | 6,36E-01 |
| <i>A_32_P212958</i>    | 1,04  | 3,61E-01 | 6,36E-01 |
| <i>ENST00000370660</i> | 1,06  | 3,62E-01 | 6,36E-01 |
| <i>AHCY</i>            | -1,06 | 3,62E-01 | 6,36E-01 |
| <i>C10orf107</i>       | -1,05 | 3,62E-01 | 6,36E-01 |
| <i>AY358791</i>        | 1,04  | 3,62E-01 | 6,36E-01 |
| <i>SEMA3A</i>          | -1,07 | 3,62E-01 | 6,36E-01 |
| <i>N40973</i>          | -1,03 | 3,62E-01 | 6,36E-01 |
| <i>KRT77</i>           | 1,03  | 3,62E-01 | 6,36E-01 |
| <i>THC2405645</i>      | 1,04  | 3,62E-01 | 6,36E-01 |
| <i>A_32_P212939</i>    | -1,05 | 3,62E-01 | 6,36E-01 |
| <i>LOC441245</i>       | 1,15  | 3,62E-01 | 6,36E-01 |
| <i>TRPV1</i>           | -1,06 | 3,62E-01 | 6,36E-01 |
| <i>AK054826</i>        | -1,04 | 3,62E-01 | 6,36E-01 |
| <i>TBC1D8</i>          | -1,04 | 3,62E-01 | 6,36E-01 |
| <i>SLC35A5</i>         | -1,03 | 3,62E-01 | 6,36E-01 |
| <i>ENST00000330255</i> | 1,04  | 3,62E-01 | 6,36E-01 |
| <i>ZNF33A</i>          | 1,04  | 3,62E-01 | 6,36E-01 |
| <i>ENST00000332270</i> | 1,04  | 3,62E-01 | 6,36E-01 |
| <i>ENST00000375606</i> | 1,05  | 3,62E-01 | 6,36E-01 |

|                        |       |          |          |
|------------------------|-------|----------|----------|
| <i>AF085848</i>        | -1,08 | 3,62E-01 | 6,36E-01 |
| <i>YME1L1</i>          | -1,03 | 3,62E-01 | 6,36E-01 |
| <i>AW085312</i>        | 1,04  | 3,62E-01 | 6,36E-01 |
| <i>THC2434166</i>      | -1,04 | 3,62E-01 | 6,36E-01 |
| <i>MAS1L</i>           | 1,03  | 3,62E-01 | 6,36E-01 |
| <i>IVD</i>             | -1,04 | 3,62E-01 | 6,36E-01 |
| <i>PIP5K2B</i>         | 1,03  | 3,62E-01 | 6,36E-01 |
| <i>BG167658</i>        | -1,04 | 3,62E-01 | 6,36E-01 |
| <i>PIGP</i>            | -1,05 | 3,62E-01 | 6,36E-01 |
| <i>RNF186</i>          | -1,05 | 3,62E-01 | 6,36E-01 |
| <i>AA181259</i>        | 1,03  | 3,63E-01 | 6,36E-01 |
| <i>TMPRSS12</i>        | 1,03  | 3,63E-01 | 6,36E-01 |
| <i>EIF3S1</i>          | 1,03  | 3,63E-01 | 6,36E-01 |
| <i>NFKBIL2</i>         | 1,03  | 3,63E-01 | 6,36E-01 |
| <i>TTY14</i>           | -1,07 | 3,63E-01 | 6,36E-01 |
| <i>SELS</i>            | 1,04  | 3,63E-01 | 6,37E-01 |
| <i>ENST00000358870</i> | -1,04 | 3,63E-01 | 6,37E-01 |
| <i>A_24_P178643</i>    | -1,05 | 3,63E-01 | 6,37E-01 |
| <i>PDE6B</i>           | -1,05 | 3,63E-01 | 6,37E-01 |
| <i>RPS15</i>           | -1,03 | 3,63E-01 | 6,37E-01 |
| <i>BX105638</i>        | -1,03 | 3,63E-01 | 6,37E-01 |
| <i>PPP1R11</i>         | 1,04  | 3,63E-01 | 6,37E-01 |
| <i>DLG2</i>            | -1,07 | 3,63E-01 | 6,37E-01 |
| <i>PSMA5</i>           | -1,03 | 3,63E-01 | 6,37E-01 |
| <i>ENST00000357697</i> | 1,04  | 3,63E-01 | 6,37E-01 |
| <i>MGC45491</i>        | -1,03 | 3,63E-01 | 6,37E-01 |
| <i>ZNF543</i>          | -1,04 | 3,63E-01 | 6,37E-01 |
| <i>ENST00000309884</i> | 1,03  | 3,63E-01 | 6,37E-01 |
| <i>A_24_P7565</i>      | 1,04  | 3,63E-01 | 6,37E-01 |
| <i>RBM7</i>            | 1,05  | 3,63E-01 | 6,37E-01 |
| <i>BC016384</i>        | 1,08  | 3,63E-01 | 6,37E-01 |
| <i>MYO18A</i>          | 1,03  | 3,64E-01 | 6,37E-01 |
| <i>A_24_P921980</i>    | 1,03  | 3,63E-01 | 6,37E-01 |
| <i>GAS2L2</i>          | 1,04  | 3,64E-01 | 6,37E-01 |
| <i>A_24_P913405</i>    | 1,05  | 3,64E-01 | 6,37E-01 |
| <i>ABI3</i>            | 1,05  | 3,64E-01 | 6,37E-01 |
| <i>A_24_P315405</i>    | 1,07  | 3,64E-01 | 6,37E-01 |
| <i>TIAM2</i>           | -1,10 | 3,64E-01 | 6,37E-01 |
| <i>THC2306791</i>      | -1,03 | 3,64E-01 | 6,38E-01 |
| <i>FAM70B</i>          | 1,05  | 3,64E-01 | 6,38E-01 |
| <i>HSD17B7P2</i>       | -1,16 | 3,64E-01 | 6,38E-01 |
| <i>AY358705</i>        | 1,05  | 3,64E-01 | 6,38E-01 |
| <i>THC2435192</i>      | -1,03 | 3,64E-01 | 6,38E-01 |
| <i>BG989860</i>        | -1,05 | 3,64E-01 | 6,38E-01 |

|                        |       |          |          |
|------------------------|-------|----------|----------|
| <i>A_24_P920247</i>    | -1,04 | 3,64E-01 | 6,38E-01 |
| <i>STUB1</i>           | 1,03  | 3,64E-01 | 6,38E-01 |
| <i>AY358690</i>        | 1,06  | 3,64E-01 | 6,38E-01 |
| <i>PNMA6A</i>          | -1,06 | 3,64E-01 | 6,38E-01 |
| <i>LOC285636</i>       | -1,04 | 3,64E-01 | 6,38E-01 |
| <i>DKFZP434K028</i>    | -1,04 | 3,64E-01 | 6,38E-01 |
| <i>ENST00000311630</i> | -1,03 | 3,64E-01 | 6,38E-01 |
| <i>ENST00000375268</i> | -1,03 | 3,64E-01 | 6,38E-01 |
| <i>A_24_P464476</i>    | 1,03  | 3,64E-01 | 6,38E-01 |
| <i>FFAR1</i>           | 1,03  | 3,64E-01 | 6,38E-01 |
| <i>IGSF21</i>          | 1,16  | 3,64E-01 | 6,38E-01 |
| <i>THC2313451</i>      | 1,04  | 3,64E-01 | 6,38E-01 |
| <i>LOC645733</i>       | 1,05  | 3,64E-01 | 6,38E-01 |
| <i>SH3GL1</i>          | -1,03 | 3,64E-01 | 6,38E-01 |
| <i>SOCS6</i>           | 1,03  | 3,65E-01 | 6,38E-01 |
| <i>AK001118</i>        | -1,05 | 3,65E-01 | 6,38E-01 |
| <i>PRNT</i>            | -1,03 | 3,65E-01 | 6,38E-01 |
| <i>BCKDK</i>           | 1,02  | 3,65E-01 | 6,39E-01 |
| <i>CR594711</i>        | 1,04  | 3,65E-01 | 6,39E-01 |
| <i>AI828007</i>        | 1,04  | 3,65E-01 | 6,39E-01 |
| <i>C21orf62</i>        | 1,09  | 3,65E-01 | 6,39E-01 |
| <i>STAMBPL1</i>        | -1,04 | 3,65E-01 | 6,39E-01 |
| <i>ANXA4</i>           | 1,05  | 3,65E-01 | 6,39E-01 |
| <i>CSNK2A1</i>         | 1,03  | 3,65E-01 | 6,39E-01 |
| <i>BC016338</i>        | -1,03 | 3,65E-01 | 6,39E-01 |
| <i>LAMC1</i>           | 1,04  | 3,65E-01 | 6,39E-01 |
| <i>NOLA1</i>           | -1,04 | 3,65E-01 | 6,39E-01 |
| <i>TK1</i>             | 1,14  | 3,65E-01 | 6,39E-01 |
| <i>CHODL</i>           | 1,20  | 3,65E-01 | 6,39E-01 |
| <i>ATP6V1G2</i>        | 1,05  | 3,65E-01 | 6,39E-01 |
| <i>FUK</i>             | -1,03 | 3,65E-01 | 6,39E-01 |
| <i>PAPOLA</i>          | 1,03  | 3,65E-01 | 6,39E-01 |
| <i>ENST00000324445</i> | 1,04  | 3,65E-01 | 6,39E-01 |
| <i>CD619445</i>        | 1,06  | 3,66E-01 | 6,39E-01 |
| <i>THC2344834</i>      | -1,04 | 3,66E-01 | 6,39E-01 |
| <i>FLJ11021</i>        | 1,03  | 3,66E-01 | 6,39E-01 |
| <i>EMX1</i>            | 1,06  | 3,66E-01 | 6,39E-01 |
| <i>THC2308031</i>      | -1,08 | 3,66E-01 | 6,39E-01 |
| <i>THC2408845</i>      | 1,03  | 3,66E-01 | 6,39E-01 |
| <i>DDX47</i>           | -1,02 | 3,66E-01 | 6,39E-01 |
| <i>ENST00000252134</i> | 1,06  | 3,66E-01 | 6,39E-01 |
| <i>A_32_P149072</i>    | -1,05 | 3,66E-01 | 6,39E-01 |
| <i>SPRYD3</i>          | 1,05  | 3,66E-01 | 6,39E-01 |
| <i>MID1</i>            | -1,05 | 3,66E-01 | 6,39E-01 |

|                        |       |          |          |
|------------------------|-------|----------|----------|
| <i>A_24_P572522</i>    | -1,03 | 3,66E-01 | 6,39E-01 |
| <i>PRSS8</i>           | 1,04  | 3,66E-01 | 6,39E-01 |
| <i>HIRIP3</i>          | -1,04 | 3,66E-01 | 6,40E-01 |
| <i>A_24_P158193</i>    | 1,04  | 3,66E-01 | 6,40E-01 |
| <i>CASP6</i>           | -1,04 | 3,66E-01 | 6,40E-01 |
| <i>HLA-DQA1</i>        | -1,14 | 3,66E-01 | 6,40E-01 |
| <i>ZNF263</i>          | -1,04 | 3,66E-01 | 6,40E-01 |
| <i>BCKDHA</i>          | 1,03  | 3,66E-01 | 6,40E-01 |
| <i>ENST00000380897</i> | 1,04  | 3,66E-01 | 6,40E-01 |
| <i>PCTK3</i>           | 1,05  | 3,66E-01 | 6,40E-01 |
| <i>LMNB1</i>           | 1,06  | 3,66E-01 | 6,40E-01 |
| <i>DHX33</i>           | -1,03 | 3,66E-01 | 6,40E-01 |
| <i>RNF157</i>          | -1,03 | 3,66E-01 | 6,40E-01 |
| <i>ZNF533</i>          | -1,08 | 3,66E-01 | 6,40E-01 |
| <i>C15orf28</i>        | -1,05 | 3,66E-01 | 6,40E-01 |
| <i>SSBP1</i>           | 1,02  | 3,66E-01 | 6,40E-01 |
| <i>A_24_P571984</i>    | 1,04  | 3,66E-01 | 6,40E-01 |
| <i>AA610484</i>        | 1,05  | 3,66E-01 | 6,40E-01 |
| <i>A_24_P910060</i>    | -1,04 | 3,66E-01 | 6,40E-01 |
| <i>A_32_P57247</i>     | -1,03 | 3,67E-01 | 6,40E-01 |
| <i>SPFH2</i>           | -1,03 | 3,66E-01 | 6,40E-01 |
| <i>TSPAN10</i>         | 1,09  | 3,66E-01 | 6,40E-01 |
| <i>ZNF295</i>          | 1,45  | 3,66E-01 | 6,40E-01 |
| <i>MYCN</i>            | -1,08 | 3,67E-01 | 6,40E-01 |
| <i>SLC35E2</i>         | -1,07 | 3,67E-01 | 6,40E-01 |
| <i>FZD8</i>            | -1,07 | 3,67E-01 | 6,40E-01 |
| <i>GSTA4</i>           | -1,05 | 3,67E-01 | 6,40E-01 |
| <i>THEM4</i>           | -1,05 | 3,67E-01 | 6,40E-01 |
| <i>A_32_P192586</i>    | 1,03  | 3,67E-01 | 6,40E-01 |
| <i>TEX15</i>           | 1,03  | 3,67E-01 | 6,40E-01 |
| <i>CLYBL</i>           | 1,04  | 3,67E-01 | 6,40E-01 |
| <i>THC2271508</i>      | 1,07  | 3,67E-01 | 6,40E-01 |
| <i>LOC440354</i>       | 1,05  | 3,67E-01 | 6,40E-01 |
| <i>WBSCR17</i>         | -1,11 | 3,67E-01 | 6,40E-01 |
| <i>BF760214</i>        | -1,07 | 3,67E-01 | 6,40E-01 |
| <i>AK021840</i>        | -1,06 | 3,67E-01 | 6,40E-01 |
| <i>DPY19L1</i>         | -1,04 | 3,67E-01 | 6,40E-01 |
| <i>A_24_P921285</i>    | -1,04 | 3,67E-01 | 6,40E-01 |
| <i>SHQ1</i>            | -1,03 | 3,67E-01 | 6,40E-01 |
| <i>THC2441925</i>      | -1,03 | 3,67E-01 | 6,40E-01 |
| <i>A_24_P333077</i>    | 1,03  | 3,67E-01 | 6,40E-01 |
| <i>CCDC58</i>          | -1,05 | 3,67E-01 | 6,40E-01 |
| <i>HCAP-G</i>          | -1,08 | 3,67E-01 | 6,40E-01 |
| <i>ABHD6</i>           | 1,05  | 3,67E-01 | 6,40E-01 |

|                        |       |          |          |
|------------------------|-------|----------|----------|
| <i>FLJ36748</i>        | -1,06 | 3,67E-01 | 6,40E-01 |
| <i>ARF3</i>            | -1,02 | 3,67E-01 | 6,40E-01 |
| <i>RNU12</i>           | 1,06  | 3,67E-01 | 6,40E-01 |
| <i>A_24_P932719</i>    | -1,04 | 3,67E-01 | 6,40E-01 |
| <i>BE695822</i>        | 1,05  | 3,67E-01 | 6,40E-01 |
| <i>ARMET</i>           | -1,05 | 3,68E-01 | 6,41E-01 |
| <i>AK054756</i>        | -1,10 | 3,68E-01 | 6,41E-01 |
| <i>CXorf12</i>         | -1,04 | 3,68E-01 | 6,41E-01 |
| <i>FRG1</i>            | -1,03 | 3,68E-01 | 6,41E-01 |
| <i>TMEM87A</i>         | 1,03  | 3,68E-01 | 6,41E-01 |
| <i>A_24_P622375</i>    | 1,04  | 3,68E-01 | 6,41E-01 |
| <i>RDS</i>             | -1,08 | 3,68E-01 | 6,41E-01 |
| <i>THC2449800</i>      | -1,07 | 3,68E-01 | 6,41E-01 |
| <i>IL1RL1</i>          | -1,05 | 3,68E-01 | 6,41E-01 |
| <i>LUZP2</i>           | 1,13  | 3,68E-01 | 6,41E-01 |
| <i>GOLGA5</i>          | -1,04 | 3,68E-01 | 6,41E-01 |
| <i>A_24_P936373</i>    | -1,03 | 3,68E-01 | 6,41E-01 |
| <i>ACOXL</i>           | 1,03  | 3,68E-01 | 6,41E-01 |
| <i>SLC2A10</i>         | -1,06 | 3,68E-01 | 6,41E-01 |
| <i>BG009439</i>        | -1,03 | 3,68E-01 | 6,41E-01 |
| <i>NMNAT2</i>          | 1,10  | 3,68E-01 | 6,41E-01 |
| <i>FLJ21127</i>        | -1,05 | 3,68E-01 | 6,42E-01 |
| <i>AF086329</i>        | 1,05  | 3,68E-01 | 6,42E-01 |
| <i>SFRS16</i>          | -1,03 | 3,68E-01 | 6,42E-01 |
| <i>MGC33302</i>        | 1,03  | 3,68E-01 | 6,42E-01 |
| <i>HOXD11</i>          | 1,06  | 3,69E-01 | 6,42E-01 |
| <i>PRKACA</i>          | 1,03  | 3,69E-01 | 6,42E-01 |
| <i>AK054806</i>        | -1,05 | 3,69E-01 | 6,42E-01 |
| <i>FZR1</i>            | 1,03  | 3,69E-01 | 6,42E-01 |
| <i>HM13</i>            | -1,05 | 3,69E-01 | 6,42E-01 |
| <i>ENST00000316772</i> | -1,04 | 3,69E-01 | 6,42E-01 |
| <i>AK125261</i>        | 1,05  | 3,69E-01 | 6,42E-01 |
| <i>BX092137</i>        | 1,04  | 3,69E-01 | 6,42E-01 |
| <i>TRBV3-1</i>         | 1,04  | 3,69E-01 | 6,42E-01 |
| <i>SLITRK5</i>         | -1,13 | 3,69E-01 | 6,43E-01 |
| <i>EIF4G2</i>          | -1,04 | 3,69E-01 | 6,43E-01 |
| <i>AI446524</i>        | 1,03  | 3,69E-01 | 6,43E-01 |
| <i>C6orf149</i>        | 1,03  | 3,69E-01 | 6,43E-01 |
| <i>VPS13B</i>          | -1,04 | 3,69E-01 | 6,43E-01 |
| <i>AK097571</i>        | 1,03  | 3,69E-01 | 6,43E-01 |
| <i>WNT9B</i>           | 1,03  | 3,69E-01 | 6,43E-01 |
| <i>AK024860</i>        | 1,04  | 3,69E-01 | 6,43E-01 |
| <i>HMGA1</i>           | 1,06  | 3,69E-01 | 6,43E-01 |
| <i>BC013935</i>        | -1,04 | 3,69E-01 | 6,43E-01 |

|                        |       |          |          |
|------------------------|-------|----------|----------|
| <i>HOXA6</i>           | 1,05  | 3,69E-01 | 6,43E-01 |
| <i>ACPL2</i>           | 1,04  | 3,69E-01 | 6,43E-01 |
| <i>A_24_P16273</i>     | 1,04  | 3,70E-01 | 6,43E-01 |
| <i>RPS12</i>           | -1,05 | 3,70E-01 | 6,43E-01 |
| <i>TCF7</i>            | -1,05 | 3,70E-01 | 6,43E-01 |
| <i>THC2407483</i>      | -1,03 | 3,70E-01 | 6,43E-01 |
| <i>ENST00000367895</i> | -1,20 | 3,70E-01 | 6,43E-01 |
| <i>AGXT</i>            | 1,02  | 3,70E-01 | 6,43E-01 |
| <i>A_24_P169976</i>    | 1,08  | 3,70E-01 | 6,43E-01 |
| <i>THC2444791</i>      | -1,04 | 3,70E-01 | 6,43E-01 |
| <i>CHRM4</i>           | 1,04  | 3,70E-01 | 6,43E-01 |
| <i>MAP2K5</i>          | 1,03  | 3,70E-01 | 6,43E-01 |
| <i>BCO71797</i>        | -1,10 | 3,70E-01 | 6,43E-01 |
| <i>A_24_P418189</i>    | -1,05 | 3,70E-01 | 6,43E-01 |
| <i>LSG1</i>            | -1,03 | 3,70E-01 | 6,43E-01 |
| <i>DSCR8</i>           | 1,05  | 3,70E-01 | 6,43E-01 |
| <i>LASS2</i>           | 1,05  | 3,70E-01 | 6,43E-01 |
| <i>LOC387761</i>       | 1,04  | 3,70E-01 | 6,43E-01 |
| <i>AT_T_M</i>          | 1,02  | 3,70E-01 | 6,43E-01 |
| <i>A_32_P134679</i>    | -1,07 | 3,70E-01 | 6,44E-01 |
| <i>MAPRE3</i>          | -1,04 | 3,71E-01 | 6,44E-01 |
| <i>SLC35B2</i>         | -1,03 | 3,70E-01 | 6,44E-01 |
| <i>AK023796</i>        | 1,03  | 3,71E-01 | 6,44E-01 |
| <i>GNB2</i>            | 1,03  | 3,71E-01 | 6,44E-01 |
| <i>C14orf2</i>         | 1,04  | 3,70E-01 | 6,44E-01 |
| <i>NPBWR2</i>          | 1,04  | 3,71E-01 | 6,44E-01 |
| <i>ATAD2</i>           | 1,04  | 3,71E-01 | 6,44E-01 |
| <i>PCDHGB1</i>         | 1,04  | 3,71E-01 | 6,44E-01 |
| <i>TXNL1</i>           | -1,03 | 3,71E-01 | 6,44E-01 |
| <i>A_24_P341626</i>    | 1,03  | 3,71E-01 | 6,44E-01 |
| <i>THC2308359</i>      | 1,06  | 3,71E-01 | 6,44E-01 |
| <i>N34682</i>          | -1,04 | 3,71E-01 | 6,44E-01 |
| <i>PP8961</i>          | 1,02  | 3,71E-01 | 6,44E-01 |
| <i>LOC284600</i>       | 1,03  | 3,71E-01 | 6,44E-01 |
| <i>FAM62A</i>          | 1,04  | 3,71E-01 | 6,44E-01 |
| <i>GDEP</i>            | -1,04 | 3,71E-01 | 6,44E-01 |
| <i>ELK1</i>            | 1,03  | 3,71E-01 | 6,44E-01 |
| <i>AI922845</i>        | 1,04  | 3,71E-01 | 6,44E-01 |
| <i>FCGR2B</i>          | 1,10  | 3,71E-01 | 6,44E-01 |
| <i>DCUN1D1</i>         | 1,03  | 3,71E-01 | 6,44E-01 |
| <i>THC2445942</i>      | 1,03  | 3,71E-01 | 6,44E-01 |
| <i>BE537483</i>        | -1,05 | 3,71E-01 | 6,45E-01 |
| <i>GNRHR2</i>          | -1,05 | 3,71E-01 | 6,45E-01 |
| <i>ANKRD13C</i>        | -1,03 | 3,71E-01 | 6,45E-01 |



|                     |       |          |          |
|---------------------|-------|----------|----------|
| <i>BU537617</i>     | -1,04 | 3,72E-01 | 6,45E-01 |
| <i>AA428090</i>     | -1,07 | 3,72E-01 | 6,45E-01 |
| <i>CLK3</i>         | 1,04  | 3,72E-01 | 6,45E-01 |
| <i>C8orf70</i>      | -1,05 | 3,72E-01 | 6,45E-01 |
| <i>A_23_P59967</i>  | -1,03 | 3,72E-01 | 6,45E-01 |
| <i>THC2334619</i>   | -1,06 | 3,72E-01 | 6,45E-01 |
| <i>C1D</i>          | 1,03  | 3,72E-01 | 6,45E-01 |
| <i>TTPA</i>         | 1,04  | 3,72E-01 | 6,45E-01 |
| <i>THC2427250</i>   | -1,04 | 3,72E-01 | 6,45E-01 |
| <i>PROO478</i>      | -1,06 | 3,72E-01 | 6,45E-01 |
| <i>C20orf172</i>    | -1,03 | 3,72E-01 | 6,45E-01 |
| <i>SDHB</i>         | 1,03  | 3,72E-01 | 6,45E-01 |
| <i>AK126814</i>     | 1,03  | 3,72E-01 | 6,45E-01 |
| <i>CHMP4A</i>       | 1,03  | 3,72E-01 | 6,45E-01 |
| <i>ZAP70</i>        | -1,35 | 3,72E-01 | 6,45E-01 |
| <i>ALDH2</i>        | -1,07 | 3,72E-01 | 6,45E-01 |
| <i>A_24_P298834</i> | -1,04 | 3,72E-01 | 6,45E-01 |
| <i>A_32_P194383</i> | -1,04 | 3,72E-01 | 6,45E-01 |
| <i>THC2441546</i>   | -1,04 | 3,72E-01 | 6,45E-01 |
| <i>THC2408793</i>   | -1,03 | 3,72E-01 | 6,45E-01 |
| <i>A_24_P937931</i> | 1,03  | 3,72E-01 | 6,45E-01 |
| <i>A_23_P170713</i> | 1,07  | 3,72E-01 | 6,45E-01 |
| <i>CAND1</i>        | -1,04 | 3,72E-01 | 6,45E-01 |
| <i>THC2438980</i>   | 1,03  | 3,72E-01 | 6,45E-01 |
| <i>CCL28</i>        | -1,08 | 3,72E-01 | 6,45E-01 |
| <i>A_24_P152983</i> | -1,04 | 3,72E-01 | 6,45E-01 |
| <i>C11orf75</i>     | -1,05 | 3,73E-01 | 6,45E-01 |
| <i>A_24_P915664</i> | 1,04  | 3,73E-01 | 6,45E-01 |
| <i>ASH1L</i>        | 1,05  | 3,73E-01 | 6,45E-01 |
| <i>ACAD10</i>       | 1,03  | 3,73E-01 | 6,46E-01 |
| <i>A_24_P853366</i> | 1,04  | 3,73E-01 | 6,46E-01 |
| <i>DUSP23</i>       | 1,05  | 3,73E-01 | 6,46E-01 |
| <i>NACA</i>         | -1,04 | 3,73E-01 | 6,46E-01 |
| <i>XAGE5</i>        | -1,03 | 3,73E-01 | 6,46E-01 |
| <i>ST7</i>          | 1,04  | 3,73E-01 | 6,46E-01 |
| <i>AI652176</i>     | 1,04  | 3,73E-01 | 6,46E-01 |
| <i>SNORA70</i>      | 1,04  | 3,73E-01 | 6,46E-01 |
| <i>EFCAB2</i>       | 1,05  | 3,73E-01 | 6,46E-01 |
| <i>C20orf112</i>    | -1,03 | 3,73E-01 | 6,46E-01 |
| <i>KO3192</i>       | 1,04  | 3,73E-01 | 6,46E-01 |
| <i>CDC25C</i>       | -1,03 | 3,73E-01 | 6,46E-01 |
| <i>WDR21C</i>       | 1,03  | 3,73E-01 | 6,47E-01 |
| <i>BC045756</i>     | 1,08  | 3,73E-01 | 6,47E-01 |
| <i>TSC22D2</i>      | 1,41  | 3,74E-01 | 6,47E-01 |

|                        |       |          |          |
|------------------------|-------|----------|----------|
| <i>DKFZp667G2110</i>   | 1,04  | 3,74E-01 | 6,47E-01 |
| <i>DTX1</i>            | -1,04 | 3,74E-01 | 6,47E-01 |
| <i>NFE2</i>            | -1,12 | 3,74E-01 | 6,47E-01 |
| <i>CPXCR1</i>          | -1,03 | 3,74E-01 | 6,47E-01 |
| <i>ASCIZ</i>           | -1,02 | 3,74E-01 | 6,47E-01 |
| <i>BU686376</i>        | 1,04  | 3,74E-01 | 6,47E-01 |
| <i>WHSC1</i>           | 1,03  | 3,74E-01 | 6,47E-01 |
| <i>BQ880155</i>        | 1,03  | 3,74E-01 | 6,47E-01 |
| <i>DSCR6</i>           | 1,05  | 3,74E-01 | 6,47E-01 |
| <i>CA314451</i>        | -1,11 | 3,74E-01 | 6,47E-01 |
| <i>SMU1</i>            | 1,02  | 3,74E-01 | 6,47E-01 |
| <i>ARL6IP6</i>         | -1,06 | 3,74E-01 | 6,47E-01 |
| <i>ANKIB1</i>          | 1,03  | 3,74E-01 | 6,47E-01 |
| <i>X15675</i>          | 1,03  | 3,74E-01 | 6,47E-01 |
| <i>CHM</i>             | 1,04  | 3,74E-01 | 6,47E-01 |
| <i>THC2446883</i>      | 1,05  | 3,74E-01 | 6,47E-01 |
| <i>TSPAN13</i>         | -1,07 | 3,74E-01 | 6,48E-01 |
| <i>THC2292168</i>      | 1,04  | 3,75E-01 | 6,48E-01 |
| <i>FLJ44087</i>        | 1,05  | 3,75E-01 | 6,48E-01 |
| <i>ENST00000381848</i> | 1,03  | 3,75E-01 | 6,48E-01 |
| <i>MTAP</i>            | -1,04 | 3,75E-01 | 6,48E-01 |
| <i>NUP98</i>           | -1,03 | 3,75E-01 | 6,48E-01 |
| <i>A_24_P915467</i>    | 1,03  | 3,75E-01 | 6,48E-01 |
| <i>NIT2</i>            | -1,03 | 3,75E-01 | 6,48E-01 |
| <i>RPS6KC1</i>         | 1,03  | 3,75E-01 | 6,48E-01 |
| <i>ENST00000324961</i> | 1,03  | 3,75E-01 | 6,48E-01 |
| <i>AI808973</i>        | 1,06  | 3,75E-01 | 6,48E-01 |
| <i>A_32_P194171</i>    | 1,03  | 3,75E-01 | 6,48E-01 |
| <i>ENST00000339367</i> | 1,03  | 3,75E-01 | 6,48E-01 |
| <i>ROPN1</i>           | 1,03  | 3,75E-01 | 6,48E-01 |
| <i>A_24_P486462</i>    | -1,03 | 3,75E-01 | 6,48E-01 |
| <i>OR4F4</i>           | -1,03 | 3,75E-01 | 6,48E-01 |
| <i>SLC9A7</i>          | -1,03 | 3,75E-01 | 6,48E-01 |
| <i>ENST00000310391</i> | -1,04 | 3,75E-01 | 6,48E-01 |
| <i>THC2340539</i>      | 1,04  | 3,76E-01 | 6,49E-01 |
| <i>A_24_P50390</i>     | 1,04  | 3,76E-01 | 6,49E-01 |
| <i>DTWD1</i>           | -1,04 | 3,76E-01 | 6,49E-01 |
| <i>LRTM2</i>           | -1,03 | 3,76E-01 | 6,49E-01 |
| <i>A_24_P928235</i>    | 1,03  | 3,76E-01 | 6,49E-01 |
| <i>DNAJC5G</i>         | -1,04 | 3,76E-01 | 6,49E-01 |
| <i>SIX6</i>            | 1,03  | 3,76E-01 | 6,49E-01 |
| <i>THC2306884</i>      | 1,04  | 3,76E-01 | 6,49E-01 |
| <i>TSR2</i>            | 1,03  | 3,76E-01 | 6,49E-01 |
| <i>A_24_P384069</i>    | 1,04  | 3,76E-01 | 6,49E-01 |

|                     |       |          |          |
|---------------------|-------|----------|----------|
| <i>MAD2L1BP</i>     | -1,03 | 3,76E-01 | 6,49E-01 |
| <i>CDC16</i>        | -1,03 | 3,76E-01 | 6,49E-01 |
| <i>BX111514</i>     | 1,03  | 3,76E-01 | 6,49E-01 |
| <i>BC027465</i>     | 1,04  | 3,76E-01 | 6,49E-01 |
| <i>SLC9A11</i>      | 1,05  | 3,76E-01 | 6,49E-01 |
| <i>C3orf33</i>      | 1,04  | 3,76E-01 | 6,49E-01 |
| <i>S65761</i>       | -1,03 | 3,76E-01 | 6,50E-01 |
| <i>THC2404479</i>   | -1,05 | 3,76E-01 | 6,50E-01 |
| <i>FLJ37078</i>     | -1,07 | 3,76E-01 | 6,50E-01 |
| <i>CXorf34</i>      | -1,04 | 3,76E-01 | 6,50E-01 |
| <i>A_24_P272713</i> | -1,03 | 3,76E-01 | 6,50E-01 |
| <i>FNDC4</i>        | 1,05  | 3,77E-01 | 6,50E-01 |
| <i>BC012026</i>     | -1,03 | 3,77E-01 | 6,50E-01 |
| <i>AF147440</i>     | 1,03  | 3,77E-01 | 6,50E-01 |
| <i>LOC81691</i>     | -1,04 | 3,77E-01 | 6,50E-01 |
| <i>KCNJ16</i>       | -1,03 | 3,77E-01 | 6,50E-01 |
| <i>A_24_P934306</i> | 1,04  | 3,77E-01 | 6,50E-01 |
| <i>GUSBL1</i>       | -1,09 | 3,77E-01 | 6,50E-01 |
| <i>MCOLN2</i>       | -1,07 | 3,77E-01 | 6,50E-01 |
| <i>SH3GLB2</i>      | 1,03  | 3,77E-01 | 6,50E-01 |
| <i>A_24_P916182</i> | 1,03  | 3,77E-01 | 6,50E-01 |
| <i>THC2314434</i>   | 1,10  | 3,77E-01 | 6,50E-01 |
| <i>A_24_P683734</i> | -1,04 | 3,77E-01 | 6,50E-01 |
| <i>EML4</i>         | -1,03 | 3,77E-01 | 6,50E-01 |
| <i>MINK1</i>        | 1,03  | 3,77E-01 | 6,50E-01 |
| <i>THC2340965</i>   | 1,04  | 3,77E-01 | 6,50E-01 |
| <i>RBM17</i>        | -1,02 | 3,77E-01 | 6,50E-01 |
| <i>LENG9</i>        | 1,04  | 3,77E-01 | 6,50E-01 |
| <i>RANGNRF</i>      | -1,03 | 3,77E-01 | 6,50E-01 |
| <i>USP42</i>        | 1,03  | 3,77E-01 | 6,50E-01 |
| <i>A_24_P676216</i> | 1,11  | 3,77E-01 | 6,50E-01 |
| <i>NADK</i>         | 1,04  | 3,77E-01 | 6,51E-01 |
| <i>THC2359588</i>   | -1,04 | 3,78E-01 | 6,51E-01 |
| <i>AF312387</i>     | 1,03  | 3,78E-01 | 6,51E-01 |
| <i>FXR2</i>         | 1,04  | 3,78E-01 | 6,51E-01 |
| <i>C6orf155</i>     | 1,04  | 3,78E-01 | 6,51E-01 |
| <i>THC2406865</i>   | 1,04  | 3,78E-01 | 6,51E-01 |
| <i>IHPK1</i>        | -1,04 | 3,78E-01 | 6,51E-01 |
| <i>C7orf34</i>      | 1,03  | 3,78E-01 | 6,51E-01 |
| <i>A_24_P917344</i> | -1,03 | 3,78E-01 | 6,51E-01 |
| <i>LOC200420</i>    | -1,04 | 3,78E-01 | 6,51E-01 |
| <i>THC2312346</i>   | 1,03  | 3,78E-01 | 6,51E-01 |
| <i>SLC39A14</i>     | 1,06  | 3,78E-01 | 6,51E-01 |
| <i>CA12</i>         | -1,14 | 3,78E-01 | 6,51E-01 |

|                        |       |          |          |
|------------------------|-------|----------|----------|
| <i>C6orf66</i>         | 1,04  | 3,78E-01 | 6,51E-01 |
| <i>THC2342912</i>      | 1,04  | 3,78E-01 | 6,51E-01 |
| <i>ENST00000273794</i> | 1,03  | 3,78E-01 | 6,51E-01 |
| <i>GDPD1</i>           | -1,04 | 3,78E-01 | 6,51E-01 |
| <i>C9orf27</i>         | -1,03 | 3,78E-01 | 6,51E-01 |
| <i>THC2277684</i>      | -1,04 | 3,78E-01 | 6,51E-01 |
| <i>PCDH21</i>          | 1,03  | 3,78E-01 | 6,51E-01 |
| <i>LOC348761</i>       | 1,04  | 3,78E-01 | 6,51E-01 |
| <i>DB326574</i>        | 1,04  | 3,79E-01 | 6,52E-01 |
| <i>SGSH</i>            | -1,03 | 3,79E-01 | 6,52E-01 |
| <i>ENST00000374929</i> | -1,05 | 3,79E-01 | 6,52E-01 |
| <i>TRMT1</i>           | -1,03 | 3,79E-01 | 6,52E-01 |
| <i>ENST00000262961</i> | -1,05 | 3,79E-01 | 6,52E-01 |
| <i>BI828796</i>        | 1,04  | 3,79E-01 | 6,52E-01 |
| <i>A_24_P486924</i>    | -1,03 | 3,79E-01 | 6,52E-01 |
| <i>A_32_P145515</i>    | 1,05  | 3,79E-01 | 6,52E-01 |
| <i>AT_L_5</i>          | 1,02  | 3,79E-01 | 6,52E-01 |
| <i>C9orf72</i>         | 1,04  | 3,79E-01 | 6,52E-01 |
| <i>C21orf109</i>       | 1,05  | 3,79E-01 | 6,52E-01 |
| <i>NDUFA7</i>          | 1,04  | 3,79E-01 | 6,52E-01 |
| <i>TRIM29</i>          | 1,13  | 3,79E-01 | 6,53E-01 |
| <i>CACNG2</i>          | -1,03 | 3,79E-01 | 6,53E-01 |
| <i>AK098562</i>        | 1,02  | 3,79E-01 | 6,53E-01 |
| <i>QKI</i>             | 1,03  | 3,79E-01 | 6,53E-01 |
| <i>SYCE1</i>           | 1,05  | 3,79E-01 | 6,53E-01 |
| <i>BC047230</i>        | 1,07  | 3,79E-01 | 6,53E-01 |
| <i>CA848728</i>        | 1,04  | 3,80E-01 | 6,53E-01 |
| <i>C3orf49</i>         | 1,03  | 3,80E-01 | 6,53E-01 |
| <i>LOC402716</i>       | -1,03 | 3,80E-01 | 6,53E-01 |
| <i>LOC646197</i>       | 1,04  | 3,80E-01 | 6,53E-01 |
| <i>FLJ23436</i>        | 1,05  | 3,80E-01 | 6,53E-01 |
| <i>AA702627</i>        | -1,04 | 3,80E-01 | 6,53E-01 |
| <i>A_24_P831034</i>    | -1,03 | 3,80E-01 | 6,53E-01 |
| <i>WNT16</i>           | -1,24 | 3,80E-01 | 6,53E-01 |
| <i>ALDH6A1</i>         | -1,06 | 3,80E-01 | 6,53E-01 |
| <i>ICK</i>             | 1,06  | 3,80E-01 | 6,53E-01 |
| <i>AK123765</i>        | -1,04 | 3,80E-01 | 6,53E-01 |
| <i>ENST00000355675</i> | 1,03  | 3,80E-01 | 6,53E-01 |
| <i>IKIP</i>            | -1,05 | 3,80E-01 | 6,53E-01 |
| <i>ENST00000373965</i> | -1,03 | 3,80E-01 | 6,53E-01 |
| <i>A_24_P192017</i>    | 1,03  | 3,80E-01 | 6,53E-01 |
| <i>BAPX1</i>           | -1,13 | 3,80E-01 | 6,54E-01 |
| <i>THC2433069</i>      | 1,03  | 3,80E-01 | 6,54E-01 |
| <i>ATP5G2</i>          | -1,03 | 3,80E-01 | 6,54E-01 |

|                        |       |          |          |
|------------------------|-------|----------|----------|
| <i>RAET1E</i>          | -1,09 | 3,81E-01 | 6,54E-01 |
| <i>C20orf96</i>        | -1,06 | 3,81E-01 | 6,54E-01 |
| <i>C14orf159</i>       | -1,06 | 3,81E-01 | 6,54E-01 |
| <i>SLC25A12</i>        | 1,05  | 3,81E-01 | 6,54E-01 |
| <i>PLSCR1</i>          | -1,07 | 3,81E-01 | 6,54E-01 |
| <i>SLC24A4</i>         | 1,05  | 3,81E-01 | 6,54E-01 |
| <i>A_24_P922449</i>    | 1,04  | 3,81E-01 | 6,54E-01 |
| <i>ARF5</i>            | 1,03  | 3,81E-01 | 6,54E-01 |
| <i>THC2322041</i>      | 1,05  | 3,81E-01 | 6,54E-01 |
| <i>KRTAP13-1</i>       | -1,04 | 3,81E-01 | 6,54E-01 |
| <i>EEF1D</i>           | 1,03  | 3,81E-01 | 6,54E-01 |
| <i>CXXC1</i>           | 1,04  | 3,81E-01 | 6,54E-01 |
| <i>YPEL1</i>           | 1,07  | 3,81E-01 | 6,54E-01 |
| <i>A_24_P24453</i>     | 1,04  | 3,81E-01 | 6,54E-01 |
| <i>A_23_P395705</i>    | -1,08 | 3,81E-01 | 6,54E-01 |
| <i>DKKL1</i>           | -1,04 | 3,81E-01 | 6,54E-01 |
| <i>RSBN1</i>           | -1,04 | 3,81E-01 | 6,54E-01 |
| <i>A_24_P859124</i>    | -1,03 | 3,81E-01 | 6,54E-01 |
| <i>ENST00000362792</i> | 1,03  | 3,81E-01 | 6,55E-01 |
| <i>A_24_P32766</i>     | 1,02  | 3,81E-01 | 6,55E-01 |
| <i>A_24_P926478</i>    | -1,03 | 3,82E-01 | 6,55E-01 |
| <i>AK097908</i>        | -1,05 | 3,82E-01 | 6,55E-01 |
| <i>A_32_P91156</i>     | -1,05 | 3,82E-01 | 6,55E-01 |
| <i>ISL2</i>            | 1,04  | 3,82E-01 | 6,55E-01 |
| <i>A_24_P221960</i>    | 1,04  | 3,82E-01 | 6,55E-01 |
| <i>ZCCHC2</i>          | 1,03  | 3,82E-01 | 6,55E-01 |
| <i>STX10</i>           | -1,04 | 3,82E-01 | 6,55E-01 |
| <i>CMTM1</i>           | -1,03 | 3,82E-01 | 6,55E-01 |
| <i>CR607939</i>        | 1,11  | 3,82E-01 | 6,55E-01 |
| <i>ENST00000360040</i> | -1,04 | 3,82E-01 | 6,55E-01 |
| <i>FLJ40448</i>        | -1,03 | 3,82E-01 | 6,55E-01 |
| <i>TMEM126B</i>        | -1,03 | 3,82E-01 | 6,55E-01 |
| <i>THC2402993</i>      | -1,04 | 3,82E-01 | 6,55E-01 |
| <i>AW192569</i>        | -1,03 | 3,82E-01 | 6,55E-01 |
| <i>ADAMTS19</i>        | -1,20 | 3,82E-01 | 6,55E-01 |
| <i>MDH1</i>            | 1,06  | 3,82E-01 | 6,56E-01 |
| <i>BC034623</i>        | -1,04 | 3,82E-01 | 6,56E-01 |
| <i>GPR45</i>           | 1,04  | 3,82E-01 | 6,56E-01 |
| <i>AK123450</i>        | 1,04  | 3,82E-01 | 6,56E-01 |
| <i>RGS9BP</i>          | 1,05  | 3,82E-01 | 6,56E-01 |
| <i>CASC2</i>           | 1,03  | 3,82E-01 | 6,56E-01 |
| <i>FRMD1</i>           | 1,03  | 3,83E-01 | 6,56E-01 |
| <i>BU622073</i>        | 1,04  | 3,83E-01 | 6,56E-01 |
| <i>BQ130147</i>        | -1,15 | 3,83E-01 | 6,56E-01 |

|                        |       |          |          |
|------------------------|-------|----------|----------|
| <i>HIST1H2AE</i>       | 1,05  | 3,83E-01 | 6,56E-01 |
| <i>SCG2</i>            | -1,18 | 3,83E-01 | 6,56E-01 |
| <i>POLDIP2</i>         | 1,03  | 3,83E-01 | 6,56E-01 |
| <i>A_24_P940079</i>    | 1,04  | 3,83E-01 | 6,56E-01 |
| <i>TP73L</i>           | 1,22  | 3,83E-01 | 6,56E-01 |
| <i>DDX46</i>           | -1,03 | 3,83E-01 | 6,56E-01 |
| <i>LOC51035</i>        | 1,04  | 3,83E-01 | 6,56E-01 |
| <i>THC2297943</i>      | 1,08  | 3,83E-01 | 6,56E-01 |
| <i>LOC642394</i>       | 1,04  | 3,83E-01 | 6,56E-01 |
| <i>BC004962</i>        | 1,04  | 3,83E-01 | 6,56E-01 |
| <i>ADCK5</i>           | -1,03 | 3,83E-01 | 6,56E-01 |
| <i>GCK</i>             | -1,04 | 3,83E-01 | 6,56E-01 |
| <i>S100G</i>           | 1,05  | 3,83E-01 | 6,56E-01 |
| <i>AK095544</i>        | 1,03  | 3,83E-01 | 6,57E-01 |
| <i>ASB2</i>            | -1,15 | 3,83E-01 | 6,57E-01 |
| <i>ATXN2</i>           | -1,03 | 3,83E-01 | 6,57E-01 |
| <i>ZNF483</i>          | 1,05  | 3,83E-01 | 6,57E-01 |
| <i>ADM</i>             | -1,10 | 3,84E-01 | 6,57E-01 |
| <i>THC2312887</i>      | -1,03 | 3,84E-01 | 6,57E-01 |
| <i>ENST00000327475</i> | -1,03 | 3,84E-01 | 6,57E-01 |
| <i>C4orf6</i>          | 1,04  | 3,84E-01 | 6,57E-01 |
| <i>PDHB</i>            | 1,04  | 3,84E-01 | 6,57E-01 |
| <i>LOC643650</i>       | 1,04  | 3,84E-01 | 6,57E-01 |
| <i>THC2407796</i>      | 1,03  | 3,84E-01 | 6,57E-01 |
| <i>TMEM12</i>          | -1,04 | 3,84E-01 | 6,57E-01 |
| <i>MGC17330</i>        | 1,07  | 3,84E-01 | 6,57E-01 |
| <i>AI492422</i>        | -1,03 | 3,84E-01 | 6,57E-01 |
| <i>NDUFS8</i>          | 1,04  | 3,84E-01 | 6,57E-01 |
| <i>ENST00000240820</i> | 1,03  | 3,84E-01 | 6,57E-01 |
| <i>A_23_P39277</i>     | 1,05  | 3,84E-01 | 6,57E-01 |
| <i>LOC554175</i>       | -1,05 | 3,84E-01 | 6,57E-01 |
| <i>FLJ38984</i>        | -1,04 | 3,84E-01 | 6,57E-01 |
| <i>HIST1H2AB</i>       | 1,04  | 3,84E-01 | 6,57E-01 |
| <i>BC031359</i>        | -1,05 | 3,84E-01 | 6,58E-01 |
| <i>CAPNS2</i>          | 1,10  | 3,84E-01 | 6,58E-01 |
| <i>AK123627</i>        | -1,05 | 3,84E-01 | 6,58E-01 |
| <i>CPA2</i>            | 1,03  | 3,85E-01 | 6,58E-01 |
| <i>KCND2</i>           | -1,12 | 3,85E-01 | 6,58E-01 |
| <i>THC2339617</i>      | -1,07 | 3,85E-01 | 6,58E-01 |
| <i>LOC439911</i>       | 1,06  | 3,85E-01 | 6,58E-01 |
| <i>ENST00000335534</i> | -1,05 | 3,85E-01 | 6,58E-01 |
| <i>PROSC</i>           | -1,04 | 3,85E-01 | 6,58E-01 |
| <i>BF725672</i>        | 1,03  | 3,85E-01 | 6,58E-01 |
| <i>THC2364953</i>      | 1,03  | 3,85E-01 | 6,58E-01 |

|                        |       |          |          |
|------------------------|-------|----------|----------|
| <i>AK021561</i>        | 1,04  | 3,85E-01 | 6,58E-01 |
| <i>BC020376</i>        | 1,04  | 3,85E-01 | 6,58E-01 |
| <i>FKBP1B</i>          | 1,05  | 3,85E-01 | 6,58E-01 |
| <i>THC2338942</i>      | 1,06  | 3,85E-01 | 6,58E-01 |
| <i>POPDC2</i>          | 1,16  | 3,85E-01 | 6,58E-01 |
| <i>MED11</i>           | -1,03 | 3,85E-01 | 6,58E-01 |
| <i>SEMA4A</i>          | 1,03  | 3,85E-01 | 6,58E-01 |
| <i>ENST00000296794</i> | 1,05  | 3,85E-01 | 6,58E-01 |
| <i>IRF3</i>            | 1,04  | 3,85E-01 | 6,58E-01 |
| <i>ENST00000360669</i> | -1,08 | 3,85E-01 | 6,58E-01 |
| <i>AK096196</i>        | 1,03  | 3,85E-01 | 6,58E-01 |
| <i>A_24_P844100</i>    | 1,04  | 3,85E-01 | 6,58E-01 |
| <i>C14orf105</i>       | -1,03 | 3,85E-01 | 6,58E-01 |
| <i>MND1</i>            | 1,05  | 3,85E-01 | 6,58E-01 |
| <i>CARD9</i>           | 1,06  | 3,85E-01 | 6,58E-01 |
| <i>ENST00000359094</i> | -1,05 | 3,85E-01 | 6,58E-01 |
| <i>AK095213</i>        | -1,07 | 3,85E-01 | 6,58E-01 |
| <i>THC2409571</i>      | -1,04 | 3,85E-01 | 6,59E-01 |
| <i>AK124558</i>        | 1,04  | 3,86E-01 | 6,59E-01 |
| <i>LOC90113</i>        | 1,08  | 3,86E-01 | 6,59E-01 |
| <i>AF132203</i>        | -1,12 | 3,86E-01 | 6,59E-01 |
| <i>BC063426</i>        | -1,04 | 3,86E-01 | 6,59E-01 |
| <i>ENST00000380021</i> | -1,04 | 3,86E-01 | 6,59E-01 |
| <i>NPCDR1</i>          | -1,03 | 3,86E-01 | 6,59E-01 |
| <i>MC4R</i>            | -1,03 | 3,86E-01 | 6,59E-01 |
| <i>SHBG</i>            | -1,03 | 3,86E-01 | 6,59E-01 |
| <i>ENST00000284414</i> | -1,03 | 3,86E-01 | 6,59E-01 |
| <i>LOC643783</i>       | 1,04  | 3,86E-01 | 6,59E-01 |
| <i>ATBF1</i>           | 1,07  | 3,86E-01 | 6,59E-01 |
| <i>AF462446</i>        | 1,08  | 3,86E-01 | 6,59E-01 |
| <i>FGFBP1</i>          | 1,44  | 3,86E-01 | 6,59E-01 |
| <i>AF116706</i>        | 1,03  | 3,86E-01 | 6,59E-01 |
| <i>A_24_P213256</i>    | 1,05  | 3,86E-01 | 6,59E-01 |
| <i>CHMP4C</i>          | 1,07  | 3,86E-01 | 6,59E-01 |
| <i>BM667833</i>        | 1,02  | 3,86E-01 | 6,59E-01 |
| <i>AF038184</i>        | -1,03 | 3,86E-01 | 6,59E-01 |
| <i>OR52A1</i>          | -1,04 | 3,86E-01 | 6,59E-01 |
| <i>A_23_P128897</i>    | -1,03 | 3,86E-01 | 6,59E-01 |
| <i>A_24_P101812</i>    | 1,04  | 3,86E-01 | 6,59E-01 |
| <i>AK021551</i>        | -1,05 | 3,86E-01 | 6,59E-01 |
| <i>NKX6-3</i>          | 1,03  | 3,86E-01 | 6,59E-01 |
| <i>AK055915</i>        | -1,11 | 3,86E-01 | 6,59E-01 |
| <i>CNTN6</i>           | 1,03  | 3,86E-01 | 6,59E-01 |
| <i>LETM2</i>           | 1,03  | 3,87E-01 | 6,59E-01 |

|                        |       |          |          |
|------------------------|-------|----------|----------|
| <i>GBP4</i>            | -1,07 | 3,87E-01 | 6,60E-01 |
| <i>A_24_P929533</i>    | -1,03 | 3,87E-01 | 6,60E-01 |
| <i>C1orf57</i>         | -1,04 | 3,87E-01 | 6,60E-01 |
| <i>ABT1</i>            | 1,03  | 3,87E-01 | 6,60E-01 |
| <i>C6orf81</i>         | -1,03 | 3,87E-01 | 6,60E-01 |
| <i>MGC20983</i>        | 1,06  | 3,87E-01 | 6,60E-01 |
| <i>CDK9</i>            | 1,04  | 3,87E-01 | 6,60E-01 |
| <i>THC2267829</i>      | 1,04  | 3,87E-01 | 6,60E-01 |
| <i>ZNFN1A4</i>         | 1,06  | 3,87E-01 | 6,60E-01 |
| <i>PLA2G4B</i>         | -1,04 | 3,87E-01 | 6,60E-01 |
| <i>FLJ39501</i>        | -1,09 | 3,87E-01 | 6,60E-01 |
| <i>C9orf125</i>        | -1,06 | 3,87E-01 | 6,60E-01 |
| <i>ABCD3</i>           | -1,03 | 3,87E-01 | 6,60E-01 |
| <i>A_24_P921174</i>    | -1,03 | 3,88E-01 | 6,60E-01 |
| <i>C14orf21</i>        | -1,03 | 3,87E-01 | 6,60E-01 |
| <i>A_24_P930506</i>    | 1,03  | 3,87E-01 | 6,60E-01 |
| <i>AF319957</i>        | 1,03  | 3,87E-01 | 6,60E-01 |
| <i>APOL1</i>           | 1,04  | 3,88E-01 | 6,60E-01 |
| <i>ENST00000371158</i> | 1,04  | 3,88E-01 | 6,60E-01 |
| <i>GLIPR1</i>          | 1,05  | 3,87E-01 | 6,60E-01 |
| <i>ZSCAN5</i>          | 1,05  | 3,87E-01 | 6,60E-01 |
| <i>CYB561D1</i>        | 1,05  | 3,87E-01 | 6,60E-01 |
| <i>CALU</i>            | 1,08  | 3,87E-01 | 6,60E-01 |
| <i>MYH11</i>           | 1,18  | 3,87E-01 | 6,60E-01 |
| <i>PROK1</i>           | 1,24  | 3,87E-01 | 6,60E-01 |
| <i>FGD2</i>            | 1,03  | 3,88E-01 | 6,60E-01 |
| <i>THC2408798</i>      | -1,03 | 3,88E-01 | 6,60E-01 |
| <i>ALG10B</i>          | -1,03 | 3,88E-01 | 6,60E-01 |
| <i>J03651</i>          | 1,04  | 3,88E-01 | 6,60E-01 |
| <i>AA653580</i>        | 1,08  | 3,88E-01 | 6,60E-01 |
| <i>SPSB3</i>           | -1,04 | 3,88E-01 | 6,60E-01 |
| <i>KIF3C</i>           | -1,04 | 3,88E-01 | 6,60E-01 |
| <i>LOC136242</i>       | -1,03 | 3,88E-01 | 6,60E-01 |
| <i>PEX5</i>            | 1,03  | 3,88E-01 | 6,60E-01 |
| <i>LHX2</i>            | 1,03  | 3,88E-01 | 6,60E-01 |
| <i>RP11-35N6.1</i>     | 1,05  | 3,88E-01 | 6,60E-01 |
| <i>FAM92B</i>          | -1,04 | 3,88E-01 | 6,60E-01 |
| <i>ZNF446</i>          | -1,03 | 3,88E-01 | 6,60E-01 |
| <i>A_24_P375573</i>    | 1,11  | 3,88E-01 | 6,60E-01 |
| <i>ZNF468</i>          | -1,05 | 3,88E-01 | 6,60E-01 |
| <i>DKFZp547C195</i>    | -1,04 | 3,88E-01 | 6,60E-01 |
| <i>A_23_P253168</i>    | 1,02  | 3,88E-01 | 6,61E-01 |
| <i>FLJ22655</i>        | -1,15 | 3,88E-01 | 6,61E-01 |
| <i>LOC255809</i>       | 1,05  | 3,88E-01 | 6,61E-01 |



|                        |       |          |          |
|------------------------|-------|----------|----------|
| <i>ENST00000359901</i> | -1,05 | 3,88E-01 | 6,61E-01 |
| <i>ZNF688</i>          | -1,03 | 3,88E-01 | 6,61E-01 |
| <i>ENST00000354346</i> | 1,03  | 3,88E-01 | 6,61E-01 |
| <i>KIAA0103</i>        | 1,03  | 3,88E-01 | 6,61E-01 |
| <i>THC2385786</i>      | 1,03  | 3,88E-01 | 6,61E-01 |
| <i>DCST1</i>           | 1,03  | 3,88E-01 | 6,61E-01 |
| <i>SLC41A3</i>         | 1,04  | 3,88E-01 | 6,61E-01 |
| <i>TRNT1</i>           | -1,04 | 3,88E-01 | 6,61E-01 |
| <i>A_24_P695669</i>    | -1,07 | 3,89E-01 | 6,61E-01 |
| <i>SPAST</i>           | -1,03 | 3,89E-01 | 6,61E-01 |
| <i>BC034818</i>        | -1,03 | 3,89E-01 | 6,61E-01 |
| <i>A_24_P383940</i>    | -1,04 | 3,89E-01 | 6,61E-01 |
| <i>POLG</i>            | -1,03 | 3,89E-01 | 6,61E-01 |
| <i>PAPD5</i>           | 1,04  | 3,89E-01 | 6,61E-01 |
| <i>UMOD</i>            | 1,03  | 3,89E-01 | 6,61E-01 |
| <i>AK001109</i>        | -1,06 | 3,89E-01 | 6,61E-01 |
| <i>GABRG3</i>          | 1,03  | 3,89E-01 | 6,61E-01 |
| <i>THC2432349</i>      | -1,03 | 3,89E-01 | 6,61E-01 |
| <i>MLLT3</i>           | -1,05 | 3,89E-01 | 6,61E-01 |
| <i>RAB30</i>           | -1,05 | 3,89E-01 | 6,61E-01 |
| <i>C1orf111</i>        | 1,02  | 3,89E-01 | 6,61E-01 |
| <i>MC5R</i>            | 1,03  | 3,89E-01 | 6,61E-01 |
| <i>AY295762</i>        | 1,04  | 3,89E-01 | 6,61E-01 |
| <i>WFDC3</i>           | 1,07  | 3,89E-01 | 6,61E-01 |
| <i>SCN5A</i>           | -1,03 | 3,89E-01 | 6,62E-01 |
| <i>A_32_P91228</i>     | -1,04 | 3,89E-01 | 6,62E-01 |
| <i>A_24_P786713</i>    | 1,07  | 3,89E-01 | 6,62E-01 |
| <i>BE935032</i>        | -1,03 | 3,89E-01 | 6,62E-01 |
| <i>THC2283258</i>      | -1,05 | 3,90E-01 | 6,62E-01 |
| <i>TM9SF1</i>          | -1,04 | 3,90E-01 | 6,62E-01 |
| <i>A_24_P926242</i>    | 1,03  | 3,90E-01 | 6,62E-01 |
| <i>LOC338579</i>       | -1,04 | 3,90E-01 | 6,62E-01 |
| <i>SIRT2</i>           | -1,02 | 3,90E-01 | 6,62E-01 |
| <i>AK098126</i>        | 1,04  | 3,90E-01 | 6,62E-01 |
| <i>LGP1</i>            | -1,05 | 3,90E-01 | 6,62E-01 |
| <i>THC2334570</i>      | -1,04 | 3,90E-01 | 6,62E-01 |
| <i>A_32_P176902</i>    | 1,04  | 3,90E-01 | 6,62E-01 |
| <i>A_32_P206917</i>    | -1,04 | 3,90E-01 | 6,62E-01 |
| <i>OR10J1</i>          | -1,03 | 3,90E-01 | 6,62E-01 |
| <i>IPF1</i>            | 1,02  | 3,90E-01 | 6,62E-01 |
| <i>PZP</i>             | 1,13  | 3,90E-01 | 6,62E-01 |
| <i>FKBPL</i>           | 1,04  | 3,90E-01 | 6,62E-01 |
| <i>U82313</i>          | 1,04  | 3,90E-01 | 6,62E-01 |
| <i>PRKRA</i>           | 1,03  | 3,90E-01 | 6,62E-01 |

|                        |       |          |          |
|------------------------|-------|----------|----------|
| <i>LOC89944</i>        | -1,07 | 3,90E-01 | 6,62E-01 |
| <i>DNAJB2</i>          | -1,05 | 3,90E-01 | 6,62E-01 |
| <i>THC2301481</i>      | 1,07  | 3,90E-01 | 6,62E-01 |
| <i>TPK1</i>            | 1,04  | 3,90E-01 | 6,62E-01 |
| <i>ENST00000373361</i> | 1,03  | 3,91E-01 | 6,63E-01 |
| <i>ITGAD</i>           | 1,03  | 3,91E-01 | 6,63E-01 |
| <i>DENND2D</i>         | -1,09 | 3,91E-01 | 6,63E-01 |
| <i>THC2427841</i>      | -1,03 | 3,91E-01 | 6,63E-01 |
| <i>AK124936</i>        | 1,06  | 3,91E-01 | 6,63E-01 |
| <i>GUF1</i>            | 1,04  | 3,91E-01 | 6,63E-01 |
| <i>FCER2</i>           | -1,04 | 3,91E-01 | 6,63E-01 |
| <i>A_24_P921636</i>    | -1,03 | 3,91E-01 | 6,63E-01 |
| <i>ZNF282</i>          | 1,03  | 3,91E-01 | 6,63E-01 |
| <i>THC2442304</i>      | 1,08  | 3,91E-01 | 6,63E-01 |
| <i>BQ354462</i>        | -1,06 | 3,91E-01 | 6,63E-01 |
| <i>WARS</i>            | 1,05  | 3,91E-01 | 6,63E-01 |
| <i>STAB2</i>           | -1,11 | 3,91E-01 | 6,63E-01 |
| <i>CKAP4</i>           | -1,10 | 3,91E-01 | 6,63E-01 |
| <i>BQ441611</i>        | -1,04 | 3,91E-01 | 6,63E-01 |
| <i>A_24_P575336</i>    | -1,04 | 3,91E-01 | 6,63E-01 |
| <i>GK2</i>             | -1,03 | 3,91E-01 | 6,63E-01 |
| <i>ZNF630</i>          | -1,03 | 3,91E-01 | 6,63E-01 |
| <i>AT_ssH_GD_5</i>     | 1,02  | 3,91E-01 | 6,63E-01 |
| <i>LOC643504</i>       | 1,02  | 3,91E-01 | 6,63E-01 |
| <i>ENST00000296343</i> | 1,07  | 3,91E-01 | 6,63E-01 |
| <i>ABLIM1</i>          | 1,08  | 3,91E-01 | 6,63E-01 |
| <i>ENST00000372288</i> | 1,10  | 3,91E-01 | 6,63E-01 |
| <i>MTDH</i>            | 1,03  | 3,91E-01 | 6,63E-01 |
| <i>PHKB</i>            | 1,03  | 3,92E-01 | 6,64E-01 |
| <i>PPIG</i>            | 1,04  | 3,92E-01 | 6,64E-01 |
| <i>PLAC1</i>           | -1,04 | 3,92E-01 | 6,64E-01 |
| <i>A_24_P915245</i>    | 1,03  | 3,92E-01 | 6,64E-01 |
| <i>OR5I1</i>           | 1,04  | 3,92E-01 | 6,64E-01 |
| <i>CD9</i>             | 1,07  | 3,92E-01 | 6,64E-01 |
| <i>TNR</i>             | -1,04 | 3,92E-01 | 6,64E-01 |
| <i>SNAP91</i>          | -1,03 | 3,92E-01 | 6,64E-01 |
| <i>RBBP8</i>           | 1,05  | 3,92E-01 | 6,64E-01 |
| <i>A_24_P926993</i>    | -1,06 | 3,92E-01 | 6,64E-01 |
| <i>LOC644907</i>       | -1,05 | 3,92E-01 | 6,64E-01 |
| <i>TGIF2LY</i>         | -1,03 | 3,92E-01 | 6,64E-01 |
| <i>THC2293382</i>      | 1,04  | 3,92E-01 | 6,64E-01 |
| <i>TNK1</i>            | 1,04  | 3,92E-01 | 6,64E-01 |
| <i>BC019667</i>        | 1,04  | 3,92E-01 | 6,64E-01 |
| <i>ASTN2</i>           | 1,07  | 3,92E-01 | 6,64E-01 |

|                        |       |          |          |
|------------------------|-------|----------|----------|
| <i>OSTalpha</i>        | -1,03 | 3,92E-01 | 6,64E-01 |
| <i>FLJ35946</i>        | 1,02  | 3,92E-01 | 6,64E-01 |
| <i>KCNH3</i>           | 1,04  | 3,92E-01 | 6,64E-01 |
| <i>CALML4</i>          | -1,09 | 3,92E-01 | 6,64E-01 |
| <i>BCL9L</i>           | -1,04 | 3,92E-01 | 6,64E-01 |
| <i>THC2338854</i>      | 1,03  | 3,92E-01 | 6,64E-01 |
| <i>A_24_P306814</i>    | 1,04  | 3,93E-01 | 6,65E-01 |
| <i>THC2385593</i>      | 1,05  | 3,93E-01 | 6,65E-01 |
| <i>KIAA0090</i>        | -1,03 | 3,93E-01 | 6,65E-01 |
| <i>SRXN1</i>           | 1,04  | 3,93E-01 | 6,65E-01 |
| <i>THC2267145</i>      | 1,06  | 3,93E-01 | 6,65E-01 |
| <i>CWF19L2</i>         | -1,04 | 3,93E-01 | 6,65E-01 |
| <i>ARHGAP26</i>        | 1,05  | 3,93E-01 | 6,65E-01 |
| <i>ENST00000317596</i> | -1,03 | 3,93E-01 | 6,65E-01 |
| <i>GPATC2</i>          | 1,05  | 3,93E-01 | 6,65E-01 |
| <i>RBM13</i>           | 1,03  | 3,93E-01 | 6,65E-01 |
| <i>C1orf42</i>         | -1,31 | 3,93E-01 | 6,65E-01 |
| <i>CB959193</i>        | -1,04 | 3,93E-01 | 6,65E-01 |
| <i>A_24_P737675</i>    | 1,03  | 3,93E-01 | 6,65E-01 |
| <i>BC035377</i>        | -1,04 | 3,93E-01 | 6,65E-01 |
| <i>A_24_P633686</i>    | -1,04 | 3,93E-01 | 6,65E-01 |
| <i>C7orf16</i>         | -1,04 | 3,93E-01 | 6,65E-01 |
| <i>ENST00000314811</i> | 1,03  | 3,93E-01 | 6,65E-01 |
| <i>CDKL1</i>           | -1,07 | 3,94E-01 | 6,66E-01 |
| <i>SLC17A6</i>         | -1,06 | 3,93E-01 | 6,66E-01 |
| <i>BC019824</i>        | -1,04 | 3,94E-01 | 6,66E-01 |
| <i>AF289591</i>        | -1,03 | 3,94E-01 | 6,66E-01 |
| <i>C11orf57</i>        | -1,03 | 3,94E-01 | 6,66E-01 |
| <i>TFAP4</i>           | 1,03  | 3,94E-01 | 6,66E-01 |
| <i>ZIC5</i>            | 1,03  | 3,94E-01 | 6,66E-01 |
| <i>CYR61</i>           | 1,23  | 3,94E-01 | 6,66E-01 |
| <i>GPR113</i>          | 1,02  | 3,94E-01 | 6,66E-01 |
| <i>IL22RA2</i>         | 1,03  | 3,94E-01 | 6,66E-01 |
| <i>AK095853</i>        | -1,04 | 3,94E-01 | 6,66E-01 |
| <i>A_32_P10100</i>     | 1,03  | 3,94E-01 | 6,66E-01 |
| <i>CR607811</i>        | 1,04  | 3,94E-01 | 6,66E-01 |
| <i>A_24_P264004</i>    | 1,05  | 3,94E-01 | 6,66E-01 |
| <i>ENST00000370306</i> | -1,21 | 3,94E-01 | 6,66E-01 |
| <i>CR592225</i>        | -1,06 | 3,94E-01 | 6,66E-01 |
| <i>CDX4</i>            | 1,03  | 3,94E-01 | 6,66E-01 |
| <i>FLJ10159</i>        | 1,07  | 3,94E-01 | 6,66E-01 |
| <i>AF086115</i>        | -1,03 | 3,94E-01 | 6,66E-01 |
| <i>GPR101</i>          | 1,03  | 3,94E-01 | 6,66E-01 |
| <i>THC2314858</i>      | 1,04  | 3,94E-01 | 6,66E-01 |

|                        |       |          |          |
|------------------------|-------|----------|----------|
| <i>THC2266397</i>      | -1,04 | 3,94E-01 | 6,66E-01 |
| <i>AA513183</i>        | -1,04 | 3,94E-01 | 6,66E-01 |
| <i>BC067767</i>        | 1,04  | 3,94E-01 | 6,66E-01 |
| <i>THC2309204</i>      | -1,03 | 3,94E-01 | 6,66E-01 |
| <i>RAB11FIP3</i>       | 1,04  | 3,94E-01 | 6,66E-01 |
| <i>AF086125</i>        | -1,06 | 3,95E-01 | 6,66E-01 |
| <i>BF509482</i>        | -1,04 | 3,94E-01 | 6,66E-01 |
| <i>TAS2R41</i>         | -1,04 | 3,95E-01 | 6,66E-01 |
| <i>SMAD5</i>           | -1,04 | 3,94E-01 | 6,66E-01 |
| <i>SUPV3L1</i>         | -1,03 | 3,95E-01 | 6,66E-01 |
| <i>AI086384</i>        | 1,03  | 3,94E-01 | 6,66E-01 |
| <i>LOC57228</i>        | -1,05 | 3,95E-01 | 6,66E-01 |
| <i>GPR17</i>           | 1,03  | 3,95E-01 | 6,66E-01 |
| <i>IFI30</i>           | -1,07 | 3,95E-01 | 6,66E-01 |
| <i>NAT8</i>            | -1,04 | 3,95E-01 | 6,66E-01 |
| <i>CTAGEP</i>          | -1,03 | 3,95E-01 | 6,66E-01 |
| <i>ENST00000320415</i> | 1,05  | 3,95E-01 | 6,66E-01 |
| <i>ALK</i>             | 1,04  | 3,95E-01 | 6,66E-01 |
| <i>BQ334425</i>        | -1,03 | 3,95E-01 | 6,66E-01 |
| <i>IMPG2</i>           | -1,04 | 3,95E-01 | 6,67E-01 |
| <i>GTPBP4</i>          | 1,04  | 3,95E-01 | 6,67E-01 |
| <i>FKSG30</i>          | 1,06  | 3,95E-01 | 6,67E-01 |
| <i>AK097214</i>        | -1,03 | 3,95E-01 | 6,67E-01 |
| <i>MGC46496</i>        | 1,03  | 3,95E-01 | 6,67E-01 |
| <i>THC2412696</i>      | 1,07  | 3,95E-01 | 6,67E-01 |
| <i>ZMPSTE24</i>        | -1,04 | 3,95E-01 | 6,67E-01 |
| <i>A_24_P50489</i>     | -1,03 | 3,95E-01 | 6,67E-01 |
| <i>A_24_P935407</i>    | 1,03  | 3,95E-01 | 6,67E-01 |
| <i>AK027257</i>        | -1,08 | 3,95E-01 | 6,67E-01 |
| <i>C1orf121</i>        | -1,03 | 3,95E-01 | 6,67E-01 |
| <i>BF827150</i>        | -1,04 | 3,95E-01 | 6,67E-01 |
| <i>AF116619</i>        | -1,04 | 3,96E-01 | 6,67E-01 |
| <i>LOC645478</i>       | -1,04 | 3,96E-01 | 6,67E-01 |
| <i>GABRA5</i>          | 1,04  | 3,96E-01 | 6,67E-01 |
| <i>GRHL1</i>           | 1,06  | 3,96E-01 | 6,67E-01 |
| <i>AI378923</i>        | -1,04 | 3,96E-01 | 6,67E-01 |
| <i>FAM116A</i>         | 1,04  | 3,96E-01 | 6,67E-01 |
| <i>BG181407</i>        | 1,03  | 3,96E-01 | 6,67E-01 |
| <i>UBE2Z</i>           | 1,02  | 3,96E-01 | 6,67E-01 |
| <i>C9orf142</i>        | -1,04 | 3,96E-01 | 6,67E-01 |
| <i>CR624390</i>        | -1,04 | 3,96E-01 | 6,67E-01 |
| <i>AK021693</i>        | -1,04 | 3,96E-01 | 6,67E-01 |
| <i>A_24_P366535</i>    | 1,04  | 3,96E-01 | 6,67E-01 |
| <i>THC2411655</i>      | -1,04 | 3,96E-01 | 6,67E-01 |

|                        |       |          |          |
|------------------------|-------|----------|----------|
| <i>A_24_P920712</i>    | -1,03 | 3,96E-01 | 6,67E-01 |
| <i>A_24_P921426</i>    | 1,03  | 3,96E-01 | 6,67E-01 |
| <i>DAD1</i>            | -1,03 | 3,96E-01 | 6,67E-01 |
| <i>CPLX2</i>           | 1,03  | 3,96E-01 | 6,67E-01 |
| <i>LRRC43</i>          | 1,04  | 3,96E-01 | 6,67E-01 |
| <i>A_32_P171348</i>    | 1,07  | 3,96E-01 | 6,67E-01 |
| <i>FBXO3</i>           | 1,03  | 3,96E-01 | 6,68E-01 |
| <i>S81294</i>          | 1,03  | 3,96E-01 | 6,68E-01 |
| <i>HOP</i>             | -1,10 | 3,96E-01 | 6,68E-01 |
| <i>AF070564</i>        | 1,03  | 3,96E-01 | 6,68E-01 |
| <i>AK098835</i>        | -1,06 | 3,96E-01 | 6,68E-01 |
| <i>A_24_P212726</i>    | -1,04 | 3,96E-01 | 6,68E-01 |
| <i>NKAP</i>            | 1,03  | 3,96E-01 | 6,68E-01 |
| <i>LOC441294</i>       | -1,02 | 3,97E-01 | 6,68E-01 |
| <i>C11orf77</i>        | -1,03 | 3,97E-01 | 6,68E-01 |
| <i>COMMD10</i>         | -1,03 | 3,97E-01 | 6,68E-01 |
| <i>HTRA3</i>           | 1,10  | 3,97E-01 | 6,68E-01 |
| <i>PAQR3</i>           | 1,06  | 3,97E-01 | 6,68E-01 |
| <i>A_24_P578445</i>    | 1,07  | 3,97E-01 | 6,68E-01 |
| <i>CTNNBIP1</i>        | -1,03 | 3,97E-01 | 6,68E-01 |
| <i>ENST00000380069</i> | 1,04  | 3,97E-01 | 6,68E-01 |
| <i>PLA2G3</i>          | 1,09  | 3,97E-01 | 6,68E-01 |
| <i>LMBRD1</i>          | -1,05 | 3,97E-01 | 6,68E-01 |
| <i>AL049447</i>        | -1,04 | 3,97E-01 | 6,68E-01 |
| <i>C10orf77</i>        | -1,03 | 3,97E-01 | 6,68E-01 |
| <i>A_24_P50294</i>     | -1,03 | 3,97E-01 | 6,68E-01 |
| <i>A_24_P298179</i>    | 1,04  | 3,97E-01 | 6,68E-01 |
| <i>AX721195</i>        | -1,08 | 3,97E-01 | 6,68E-01 |
| <i>BC014971</i>        | -1,06 | 3,97E-01 | 6,68E-01 |
| <i>PRDX1</i>           | -1,03 | 3,97E-01 | 6,68E-01 |
| <i>BI771744</i>        | -1,03 | 3,97E-01 | 6,68E-01 |
| <i>THC2451055</i>      | 1,03  | 3,97E-01 | 6,68E-01 |
| <i>GSTO2</i>           | 1,06  | 3,97E-01 | 6,68E-01 |
| <i>BTBD3</i>           | 1,07  | 3,97E-01 | 6,68E-01 |
| <i>ACE2</i>            | -1,04 | 3,97E-01 | 6,68E-01 |
| <i>A_23_P207233</i>    | 1,04  | 3,97E-01 | 6,68E-01 |
| <i>A_32_P85711</i>     | 1,06  | 3,97E-01 | 6,69E-01 |
| <i>BC045718</i>        | -1,03 | 3,98E-01 | 6,69E-01 |
| <i>MAGEB5</i>          | -1,04 | 3,98E-01 | 6,69E-01 |
| <i>RACGAP1P</i>        | 1,02  | 3,98E-01 | 6,69E-01 |
| <i>AK094523</i>        | 1,04  | 3,98E-01 | 6,69E-01 |
| <i>A_24_P273245</i>    | 1,05  | 3,98E-01 | 6,69E-01 |
| <i>GPA33</i>           | -1,02 | 3,98E-01 | 6,69E-01 |
| <i>BC030100</i>        | -1,12 | 3,98E-01 | 6,69E-01 |

|                        |       |          |          |
|------------------------|-------|----------|----------|
| <i>CST9</i>            | 1,03  | 3,98E-01 | 6,69E-01 |
| <i>A_24_P698376</i>    | -1,03 | 3,98E-01 | 6,69E-01 |
| <i>AY358688</i>        | -1,03 | 3,98E-01 | 6,69E-01 |
| <i>SLC22A3</i>         | 1,12  | 3,98E-01 | 6,69E-01 |
| <i>PCDH7</i>           | -1,14 | 3,98E-01 | 6,69E-01 |
| <i>THC2370432</i>      | -1,06 | 3,98E-01 | 6,69E-01 |
| <i>THC2442833</i>      | 1,03  | 3,98E-01 | 6,69E-01 |
| <i>CCDC95</i>          | -1,03 | 3,98E-01 | 6,69E-01 |
| <i>AF143324</i>        | 1,04  | 3,98E-01 | 6,69E-01 |
| <i>THC2265088</i>      | 1,04  | 3,98E-01 | 6,69E-01 |
| <i>THC2336549</i>      | 1,05  | 3,98E-01 | 6,69E-01 |
| <i>A_24_P724106</i>    | -1,03 | 3,98E-01 | 6,69E-01 |
| <i>RNH1</i>            | -1,03 | 3,98E-01 | 6,69E-01 |
| <i>BU622581</i>        | -1,03 | 3,98E-01 | 6,69E-01 |
| <i>LOC554202</i>       | -1,03 | 3,98E-01 | 6,69E-01 |
| <i>UBXD4</i>           | 1,03  | 3,98E-01 | 6,69E-01 |
| <i>AK095300</i>        | 1,04  | 3,98E-01 | 6,69E-01 |
| <i>FLJ42342</i>        | -1,05 | 3,99E-01 | 6,69E-01 |
| <i>ENST00000373014</i> | -1,05 | 3,99E-01 | 6,69E-01 |
| <i>FN3KRP</i>          | -1,05 | 3,99E-01 | 6,69E-01 |
| <i>A_24_P920148</i>    | -1,03 | 3,99E-01 | 6,69E-01 |
| <i>C20orf72</i>        | -1,03 | 3,99E-01 | 6,69E-01 |
| <i>EEF1B2</i>          | -1,03 | 3,99E-01 | 6,69E-01 |
| <i>A_24_P926709</i>    | 1,03  | 3,99E-01 | 6,69E-01 |
| <i>AF090903</i>        | 1,03  | 3,99E-01 | 6,69E-01 |
| <i>GAS5</i>            | -1,07 | 3,99E-01 | 6,69E-01 |
| <i>TMEM23</i>          | -1,04 | 3,99E-01 | 6,70E-01 |
| <i>METTL7B</i>         | 1,03  | 3,99E-01 | 6,70E-01 |
| <i>A_24_P568645</i>    | 1,05  | 3,99E-01 | 6,70E-01 |
| <i>BX110856</i>        | -1,19 | 3,99E-01 | 6,70E-01 |
| <i>RP11-298P3.3</i>    | -1,05 | 3,99E-01 | 6,70E-01 |
| <i>FASTKD1</i>         | -1,05 | 3,99E-01 | 6,70E-01 |
| <i>A_24_P340771</i>    | 1,02  | 3,99E-01 | 6,70E-01 |
| <i>ENST00000306024</i> | 1,03  | 3,99E-01 | 6,70E-01 |
| <i>HTRA1</i>           | 1,06  | 3,99E-01 | 6,70E-01 |
| <i>MYO1D</i>           | 1,07  | 3,99E-01 | 6,70E-01 |
| <i>CIDEA</i>           | -1,06 | 3,99E-01 | 6,70E-01 |
| <i>STK35</i>           | 1,05  | 3,99E-01 | 6,70E-01 |
| <i>C11orf45</i>        | -1,04 | 3,99E-01 | 6,70E-01 |
| <i>BG944924</i>        | 1,03  | 3,99E-01 | 6,70E-01 |
| <i>PVRL1</i>           | 1,07  | 3,99E-01 | 6,70E-01 |
| <i>PDZD3</i>           | -1,03 | 3,99E-01 | 6,70E-01 |
| <i>BC032332</i>        | -1,04 | 4,00E-01 | 6,70E-01 |
| <i>MGC10981</i>        | 1,04  | 4,00E-01 | 6,70E-01 |

|                        |       |          |          |
|------------------------|-------|----------|----------|
| <i>A_24_P16291</i>     | 1,05  | 4,00E-01 | 6,70E-01 |
| <i>BX115897</i>        | -1,05 | 4,00E-01 | 6,70E-01 |
| <i>NDUFA3</i>          | -1,04 | 4,00E-01 | 6,70E-01 |
| <i>PRPF40B</i>         | -1,03 | 4,00E-01 | 6,70E-01 |
| <i>A_24_P230130</i>    | 1,03  | 4,00E-01 | 6,70E-01 |
| <i>ZWINTAS</i>         | 1,03  | 4,00E-01 | 6,70E-01 |
| <i>KIAA1688</i>        | 1,04  | 4,00E-01 | 6,70E-01 |
| <i>TLE4</i>            | 1,04  | 4,00E-01 | 6,70E-01 |
| <i>ECEL1P2</i>         | -1,03 | 4,00E-01 | 6,70E-01 |
| <i>AF131782</i>        | -1,05 | 4,00E-01 | 6,70E-01 |
| <i>AY358491</i>        | -1,02 | 4,00E-01 | 6,70E-01 |
| <i>TRY1</i>            | -1,03 | 4,00E-01 | 6,70E-01 |
| <i>AK026351</i>        | 1,03  | 4,00E-01 | 6,70E-01 |
| <i>CT45-1</i>          | -1,03 | 4,00E-01 | 6,70E-01 |
| <i>A_24_P922096</i>    | 1,03  | 4,00E-01 | 6,71E-01 |
| <i>MAN2A2</i>          | 1,03  | 4,00E-01 | 6,71E-01 |
| <i>ASB4</i>            | 1,09  | 4,00E-01 | 6,71E-01 |
| <i>MEST</i>            | -1,08 | 4,00E-01 | 6,71E-01 |
| <i>ENST00000327579</i> | 1,06  | 4,00E-01 | 6,71E-01 |
| <i>MAGEB18</i>         | 1,03  | 4,00E-01 | 6,71E-01 |
| <i>BC070363</i>        | -1,06 | 4,00E-01 | 6,71E-01 |
| <i>CRYBA2</i>          | 1,03  | 4,00E-01 | 6,71E-01 |
| <i>ENST00000375419</i> | 1,05  | 4,00E-01 | 6,71E-01 |
| <i>AI805367</i>        | 1,03  | 4,00E-01 | 6,71E-01 |
| <i>FLJ11506</i>        | 1,04  | 4,01E-01 | 6,71E-01 |
| <i>A_24_P264413</i>    | 1,06  | 4,01E-01 | 6,71E-01 |
| <i>BC045562</i>        | -1,05 | 4,01E-01 | 6,71E-01 |
| <i>ADRBK2</i>          | -1,04 | 4,01E-01 | 6,71E-01 |
| <i>C19orf18</i>        | -1,03 | 4,01E-01 | 6,71E-01 |
| <i>A_24_P306968</i>    | -1,03 | 4,01E-01 | 6,71E-01 |
| <i>CYorf15B</i>        | -1,03 | 4,01E-01 | 6,71E-01 |
| <i>SIVA</i>            | 1,03  | 4,01E-01 | 6,71E-01 |
| <i>BM455859</i>        | 1,03  | 4,01E-01 | 6,71E-01 |
| <i>INTS5</i>           | 1,03  | 4,01E-01 | 6,71E-01 |
| <i>CR619250</i>        | 1,04  | 4,01E-01 | 6,71E-01 |
| <i>NFE2L2</i>          | 1,05  | 4,01E-01 | 6,71E-01 |
| <i>DNAJB9</i>          | -1,05 | 4,01E-01 | 6,71E-01 |
| <i>C9orf156</i>        | 1,03  | 4,01E-01 | 6,71E-01 |
| <i>AK023391</i>        | 1,15  | 4,01E-01 | 6,71E-01 |
| <i>BET1L</i>           | -1,04 | 4,01E-01 | 6,71E-01 |
| <i>HIST1H4C</i>        | -1,03 | 4,01E-01 | 6,71E-01 |
| <i>DUSP9</i>           | 1,03  | 4,01E-01 | 6,71E-01 |
| <i>ZNF229</i>          | -1,05 | 4,01E-01 | 6,72E-01 |
| <i>NOL5A</i>           | -1,02 | 4,01E-01 | 6,72E-01 |

|                        |       |          |          |
|------------------------|-------|----------|----------|
| <i>TOM1L2</i>          | 1,04  | 4,02E-01 | 6,72E-01 |
| <i>ENST00000343959</i> | -1,33 | 4,02E-01 | 6,72E-01 |
| <i>ASB1</i>            | -1,04 | 4,02E-01 | 6,72E-01 |
| <i>KCNIP4</i>          | -1,08 | 4,02E-01 | 6,72E-01 |
| <i>A_24_P101231</i>    | -1,04 | 4,02E-01 | 6,72E-01 |
| <i>FAM51A1</i>         | -1,03 | 4,02E-01 | 6,72E-01 |
| <i>BM309910</i>        | -1,03 | 4,02E-01 | 6,72E-01 |
| <i>LOC391257</i>       | 1,03  | 4,02E-01 | 6,72E-01 |
| <i>THC2317900</i>      | 1,06  | 4,02E-01 | 6,72E-01 |
| <i>WNK1</i>            | 1,03  | 4,02E-01 | 6,72E-01 |
| <i>THC2340231</i>      | 1,03  | 4,02E-01 | 6,72E-01 |
| <i>HEMK1</i>           | -1,03 | 4,02E-01 | 6,72E-01 |
| <i>THC2281176</i>      | 1,07  | 4,02E-01 | 6,72E-01 |
| <i>AA344632</i>        | -1,05 | 4,02E-01 | 6,73E-01 |
| <i>ENST00000367073</i> | -1,04 | 4,02E-01 | 6,73E-01 |
| <i>C5orf3</i>          | -1,04 | 4,02E-01 | 6,73E-01 |
| <i>C3orf53</i>         | -1,03 | 4,02E-01 | 6,73E-01 |
| <i>SLC22A8</i>         | 1,04  | 4,02E-01 | 6,73E-01 |
| <i>GGT1</i>            | -1,03 | 4,02E-01 | 6,73E-01 |
| <i>HACL1</i>           | 1,03  | 4,02E-01 | 6,73E-01 |
| <i>RFC1</i>            | 1,03  | 4,02E-01 | 6,73E-01 |
| <i>A_23_P74471</i>     | -1,03 | 4,03E-01 | 6,73E-01 |
| <i>CDC2</i>            | 1,05  | 4,03E-01 | 6,73E-01 |
| <i>AYTL1</i>           | -1,08 | 4,03E-01 | 6,73E-01 |
| <i>LOC441964</i>       | -1,04 | 4,03E-01 | 6,73E-01 |
| <i>NAT10</i>           | -1,03 | 4,03E-01 | 6,73E-01 |
| <i>AF119844</i>        | -1,03 | 4,03E-01 | 6,73E-01 |
| <i>ENST00000309140</i> | -1,03 | 4,03E-01 | 6,73E-01 |
| <i>A_24_P916211</i>    | 1,03  | 4,03E-01 | 6,73E-01 |
| <i>A_24_P934295</i>    | 1,03  | 4,03E-01 | 6,73E-01 |
| <i>FLJ14100</i>        | 1,03  | 4,03E-01 | 6,73E-01 |
| <i>RPA3</i>            | -1,03 | 4,03E-01 | 6,73E-01 |
| <i>CNOT7</i>           | -1,03 | 4,03E-01 | 6,73E-01 |
| <i>NDUFB2</i>          | 1,05  | 4,03E-01 | 6,73E-01 |
| <i>STX17</i>           | 1,03  | 4,03E-01 | 6,73E-01 |
| <i>LOC349408</i>       | 1,03  | 4,03E-01 | 6,73E-01 |
| <i>AL038125</i>        | 1,04  | 4,03E-01 | 6,73E-01 |
| <i>FSTL1</i>           | 1,06  | 4,03E-01 | 6,73E-01 |
| <i>AK090830</i>        | -1,03 | 4,03E-01 | 6,73E-01 |
| <i>A_24_P916116</i>    | -1,05 | 4,03E-01 | 6,73E-01 |
| <i>THC2408938</i>      | 1,03  | 4,03E-01 | 6,73E-01 |
| <i>THC2380106</i>      | 1,04  | 4,03E-01 | 6,73E-01 |
| <i>MLH1</i>            | -1,05 | 4,03E-01 | 6,73E-01 |
| <i>C19orf46</i>        | -1,04 | 4,03E-01 | 6,73E-01 |



|                        |       |          |          |
|------------------------|-------|----------|----------|
| <i>PCYT2</i>           | -1,03 | 4,03E-01 | 6,73E-01 |
| <i>UBE2U</i>           | 1,02  | 4,03E-01 | 6,73E-01 |
| <i>POU4F3</i>          | 1,03  | 4,03E-01 | 6,73E-01 |
| <i>PDE6G</i>           | 1,03  | 4,03E-01 | 6,73E-01 |
| <i>KHK</i>             | 1,05  | 4,03E-01 | 6,73E-01 |
| <i>MST150</i>          | 1,06  | 4,03E-01 | 6,73E-01 |
| <i>HERC6</i>           | -1,04 | 4,04E-01 | 6,73E-01 |
| <i>CATSPER3</i>        | -1,04 | 4,04E-01 | 6,73E-01 |
| <i>BX108395</i>        | -1,03 | 4,04E-01 | 6,74E-01 |
| <i>LRRC29</i>          | 1,03  | 4,04E-01 | 6,74E-01 |
| <i>RBAK</i>            | -1,04 | 4,04E-01 | 6,74E-01 |
| <i>EPPB9</i>           | -1,06 | 4,04E-01 | 6,74E-01 |
| <i>BC032041</i>        | -1,04 | 4,04E-01 | 6,74E-01 |
| <i>THC2358128</i>      | 1,04  | 4,04E-01 | 6,74E-01 |
| <i>TLX1</i>            | 1,04  | 4,04E-01 | 6,74E-01 |
| <i>FOXE1</i>           | 1,07  | 4,04E-01 | 6,74E-01 |
| <i>ZXDA</i>            | 1,03  | 4,04E-01 | 6,74E-01 |
| <i>PCSK9</i>           | -1,13 | 4,04E-01 | 6,74E-01 |
| <i>GBA3</i>            | -1,03 | 4,04E-01 | 6,74E-01 |
| <i>ENST00000381528</i> | 1,04  | 4,04E-01 | 6,74E-01 |
| <i>TRAPPC2L</i>        | 1,03  | 4,04E-01 | 6,74E-01 |
| <i>THC2442419</i>      | -1,04 | 4,04E-01 | 6,74E-01 |
| <i>AF090942</i>        | -1,03 | 4,04E-01 | 6,74E-01 |
| <i>MAPK8IP2</i>        | -1,03 | 4,04E-01 | 6,74E-01 |
| <i>PLTP</i>            | 1,09  | 4,04E-01 | 6,74E-01 |
| <i>PSKH1</i>           | -1,04 | 4,05E-01 | 6,74E-01 |
| <i>A_32_P148636</i>    | -1,03 | 4,05E-01 | 6,74E-01 |
| <i>LARP7</i>           | 1,03  | 4,05E-01 | 6,74E-01 |
| <i>EDG8</i>            | 1,03  | 4,05E-01 | 6,74E-01 |
| <i>AF113008</i>        | 1,04  | 4,05E-01 | 6,74E-01 |
| <i>AT_nB_5</i>         | 1,03  | 4,05E-01 | 6,74E-01 |
| <i>MRPS27</i>          | -1,03 | 4,05E-01 | 6,74E-01 |
| <i>THC2280907</i>      | 1,04  | 4,05E-01 | 6,74E-01 |
| <i>A_24_P287526</i>    | 1,04  | 4,05E-01 | 6,75E-01 |
| <i>A_23_P17152</i>     | -1,07 | 4,05E-01 | 6,75E-01 |
| <i>SDF2L1</i>          | -1,06 | 4,05E-01 | 6,75E-01 |
| <i>THC2385978</i>      | 1,03  | 4,05E-01 | 6,75E-01 |
| <i>AOC3</i>            | 1,10  | 4,05E-01 | 6,75E-01 |
| <i>AW901755</i>        | -1,06 | 4,05E-01 | 6,75E-01 |
| <i>KCNJ8</i>           | 1,08  | 4,05E-01 | 6,75E-01 |
| <i>AK091409</i>        | -1,04 | 4,05E-01 | 6,75E-01 |
| <i>BC004387</i>        | -1,04 | 4,05E-01 | 6,75E-01 |
| <i>BU618279</i>        | 1,04  | 4,05E-01 | 6,75E-01 |
| <i>A_24_P384239</i>    | 1,12  | 4,05E-01 | 6,75E-01 |

|                        |       |          |          |
|------------------------|-------|----------|----------|
| <i>SNX10</i>           | -1,05 | 4,05E-01 | 6,75E-01 |
| <i>AF116716</i>        | -1,04 | 4,05E-01 | 6,75E-01 |
| <i>TEX264</i>          | 1,03  | 4,05E-01 | 6,75E-01 |
| <i>ENST00000382878</i> | 1,09  | 4,05E-01 | 6,75E-01 |
| <i>R60067</i>          | 1,04  | 4,05E-01 | 6,75E-01 |
| <i>CYB5R4</i>          | 1,04  | 4,05E-01 | 6,75E-01 |
| <i>FTH1</i>            | 1,04  | 4,05E-01 | 6,75E-01 |
| <i>LCE2A</i>           | -1,06 | 4,06E-01 | 6,75E-01 |
| <i>RC6</i>             | 1,02  | 4,06E-01 | 6,75E-01 |
| <i>GNL1</i>            | 1,03  | 4,06E-01 | 6,75E-01 |
| <i>ZNF548</i>          | 1,02  | 4,06E-01 | 6,75E-01 |
| <i>CDH15</i>           | -1,06 | 4,06E-01 | 6,75E-01 |
| <i>DTX3</i>            | -1,04 | 4,06E-01 | 6,75E-01 |
| <i>CENTD2</i>          | -1,04 | 4,06E-01 | 6,75E-01 |
| <i>SFT2D1</i>          | -1,03 | 4,06E-01 | 6,75E-01 |
| <i>AA155810</i>        | -1,03 | 4,06E-01 | 6,75E-01 |
| <i>CR749856</i>        | 1,05  | 4,06E-01 | 6,75E-01 |
| <i>PYGB</i>            | 1,08  | 4,06E-01 | 6,75E-01 |
| <i>P4HA2</i>           | 1,12  | 4,06E-01 | 6,75E-01 |
| <i>ENST00000326474</i> | -1,04 | 4,06E-01 | 6,75E-01 |
| <i>FLJ22675</i>        | -1,03 | 4,06E-01 | 6,75E-01 |
| <i>THC2410279</i>      | 1,09  | 4,06E-01 | 6,75E-01 |
| <i>THC2441719</i>      | -1,05 | 4,06E-01 | 6,76E-01 |
| <i>AL832942</i>        | -1,04 | 4,06E-01 | 6,76E-01 |
| <i>LOC284361</i>       | -1,03 | 4,06E-01 | 6,76E-01 |
| <i>ENST00000312498</i> | 1,03  | 4,06E-01 | 6,76E-01 |
| <i>MAST1</i>           | -1,03 | 4,06E-01 | 6,76E-01 |
| <i>AA593970</i>        | -1,06 | 4,06E-01 | 6,76E-01 |
| <i>EEA1</i>            | -1,04 | 4,06E-01 | 6,76E-01 |
| <i>A_24_P913835</i>    | -1,04 | 4,06E-01 | 6,76E-01 |
| <i>NHP2L1</i>          | 1,03  | 4,06E-01 | 6,76E-01 |
| <i>TSPO</i>            | 1,04  | 4,06E-01 | 6,76E-01 |
| <i>LOC158345</i>       | -1,03 | 4,06E-01 | 6,76E-01 |
| <i>SH3BGRL</i>         | -1,06 | 4,06E-01 | 6,76E-01 |
| <i>GHRHR</i>           | 1,03  | 4,06E-01 | 6,76E-01 |
| <i>FOXG1B</i>          | 1,02  | 4,07E-01 | 6,76E-01 |
| <i>LOC285827</i>       | 1,04  | 4,07E-01 | 6,76E-01 |
| <i>ZNF568</i>          | -1,03 | 4,07E-01 | 6,76E-01 |
| <i>A_24_P324606</i>    | 1,04  | 4,07E-01 | 6,76E-01 |
| <i>CETN2</i>           | -1,05 | 4,07E-01 | 6,76E-01 |
| <i>CXorf43</i>         | 1,03  | 4,07E-01 | 6,76E-01 |
| <i>RPL36AL</i>         | -1,04 | 4,07E-01 | 6,76E-01 |
| <i>A_24_P562369</i>    | 1,05  | 4,07E-01 | 6,77E-01 |
| <i>NPFFR1</i>          | 1,03  | 4,07E-01 | 6,77E-01 |

|                        |       |          |          |
|------------------------|-------|----------|----------|
| <i>A_24_P926044</i>    | 1,04  | 4,07E-01 | 6,77E-01 |
| <i>AA573434</i>        | 1,04  | 4,07E-01 | 6,77E-01 |
| <i>C1orf91</i>         | 1,02  | 4,07E-01 | 6,77E-01 |
| <i>THC2386609</i>      | -1,03 | 4,07E-01 | 6,77E-01 |
| <i>TNNI3</i>           | 1,02  | 4,07E-01 | 6,77E-01 |
| <i>PWP1</i>            | 1,02  | 4,07E-01 | 6,77E-01 |
| <i>BG163514</i>        | 1,08  | 4,07E-01 | 6,77E-01 |
| <i>MLNR</i>            | -1,07 | 4,08E-01 | 6,77E-01 |
| <i>ENST00000341948</i> | -1,03 | 4,08E-01 | 6,77E-01 |
| <i>PSMD9</i>           | 1,03  | 4,08E-01 | 6,77E-01 |
| <i>BC033566</i>        | 1,03  | 4,08E-01 | 6,77E-01 |
| <i>LAMA4</i>           | 1,04  | 4,08E-01 | 6,77E-01 |
| <i>ZDHHC14</i>         | 1,06  | 4,08E-01 | 6,77E-01 |
| <i>RSL1D1</i>          | -1,03 | 4,08E-01 | 6,77E-01 |
| <i>C19orf2</i>         | 1,04  | 4,08E-01 | 6,77E-01 |
| <i>C16orf71</i>        | -1,03 | 4,08E-01 | 6,77E-01 |
| <i>NYX</i>             | 1,04  | 4,08E-01 | 6,77E-01 |
| <i>AK026784</i>        | 1,07  | 4,08E-01 | 6,77E-01 |
| <i>SFPQ</i>            | 1,04  | 4,08E-01 | 6,77E-01 |
| <i>ITGA4</i>           | -1,06 | 4,08E-01 | 6,77E-01 |
| <i>THC2305027</i>      | -1,06 | 4,08E-01 | 6,77E-01 |
| <i>BE008305</i>        | -1,04 | 4,08E-01 | 6,77E-01 |
| <i>TOP1P2</i>          | -1,03 | 4,08E-01 | 6,77E-01 |
| <i>A_24_P944502</i>    | 1,03  | 4,08E-01 | 6,77E-01 |
| <i>OR5T2</i>           | 1,03  | 4,08E-01 | 6,77E-01 |
| <i>ENST00000305922</i> | 1,03  | 4,08E-01 | 6,77E-01 |
| <i>MRPS10</i>          | -1,03 | 4,08E-01 | 6,78E-01 |
| <i>A_24_P195145</i>    | -1,03 | 4,08E-01 | 6,78E-01 |
| <i>ENST00000356126</i> | -1,05 | 4,09E-01 | 6,78E-01 |
| <i>G3BP2</i>           | -1,02 | 4,09E-01 | 6,78E-01 |
| <i>A_24_P924125</i>    | -1,04 | 4,09E-01 | 6,78E-01 |
| <i>KIAA0556</i>        | -1,03 | 4,09E-01 | 6,78E-01 |
| <i>THC2269190</i>      | -1,04 | 4,09E-01 | 6,78E-01 |
| <i>RHCE</i>            | -1,04 | 4,09E-01 | 6,78E-01 |
| <i>THC2375957</i>      | 1,03  | 4,09E-01 | 6,78E-01 |
| <i>PPP1CC</i>          | -1,02 | 4,09E-01 | 6,78E-01 |
| <i>A_32_P128952</i>    | 1,03  | 4,09E-01 | 6,78E-01 |
| <i>ELF4</i>            | 1,04  | 4,09E-01 | 6,78E-01 |
| <i>CREBL2</i>          | 1,03  | 4,09E-01 | 6,79E-01 |
| <i>ATP6V1G1</i>        | -1,04 | 4,09E-01 | 6,79E-01 |
| <i>AL598801</i>        | 1,04  | 4,09E-01 | 6,79E-01 |
| <i>LOC440456</i>       | 1,03  | 4,10E-01 | 6,79E-01 |
| <i>XG</i>              | 1,13  | 4,10E-01 | 6,79E-01 |
| <i>FAM83E</i>          | 1,03  | 4,10E-01 | 6,79E-01 |

|                        |       |          |          |
|------------------------|-------|----------|----------|
| <i>LMAN1</i>           | 1,06  | 4,10E-01 | 6,79E-01 |
| <i>THRAP5</i>          | -1,03 | 4,10E-01 | 6,79E-01 |
| <i>A_24_P126691</i>    | -1,03 | 4,10E-01 | 6,79E-01 |
| <i>THC2241620</i>      | 1,03  | 4,10E-01 | 6,79E-01 |
| <i>CEACAM5</i>         | -1,06 | 4,10E-01 | 6,79E-01 |
| <i>TRPT1</i>           | 1,02  | 4,10E-01 | 6,79E-01 |
| <i>AF210649</i>        | 1,04  | 4,10E-01 | 6,79E-01 |
| <i>A_24_P918911</i>    | -1,03 | 4,10E-01 | 6,79E-01 |
| <i>FIBCD1</i>          | 1,03  | 4,10E-01 | 6,80E-01 |
| <i>AK056182</i>        | -1,03 | 4,10E-01 | 6,80E-01 |
| <i>AP1G1</i>           | -1,02 | 4,10E-01 | 6,80E-01 |
| <i>A_24_P920227</i>    | 1,03  | 4,10E-01 | 6,80E-01 |
| <i>C6orf189</i>        | -1,05 | 4,10E-01 | 6,80E-01 |
| <i>HMGCL</i>           | -1,03 | 4,10E-01 | 6,80E-01 |
| <i>PRPS1</i>           | 1,02  | 4,10E-01 | 6,80E-01 |
| <i>LOC389599</i>       | -1,03 | 4,10E-01 | 6,80E-01 |
| <i>PROCR</i>           | -1,05 | 4,11E-01 | 6,80E-01 |
| <i>SMNDC1</i>          | -1,04 | 4,11E-01 | 6,80E-01 |
| <i>ZNF650</i>          | -1,04 | 4,11E-01 | 6,80E-01 |
| <i>THC2343707</i>      | -1,03 | 4,11E-01 | 6,80E-01 |
| <i>A_32_P220567</i>    | 1,04  | 4,11E-01 | 6,80E-01 |
| <i>ENST00000317720</i> | -1,03 | 4,11E-01 | 6,80E-01 |
| <i>RAB40A</i>          | 1,02  | 4,11E-01 | 6,80E-01 |
| <i>TMEM133</i>         | -1,04 | 4,11E-01 | 6,80E-01 |
| <i>PAPSS1</i>          | -1,03 | 4,11E-01 | 6,80E-01 |
| <i>TUSC5</i>           | -1,02 | 4,11E-01 | 6,80E-01 |
| <i>A_24_P153234</i>    | 1,06  | 4,11E-01 | 6,80E-01 |
| <i>PTPN12</i>          | 1,05  | 4,11E-01 | 6,80E-01 |
| <i>THRSP</i>           | -1,06 | 4,11E-01 | 6,80E-01 |
| <i>A_24_P383751</i>    | 1,04  | 4,11E-01 | 6,80E-01 |
| <i>CALML6</i>          | 1,03  | 4,11E-01 | 6,80E-01 |
| <i>AK022059</i>        | -1,04 | 4,11E-01 | 6,80E-01 |
| <i>TAP2</i>            | 1,02  | 4,11E-01 | 6,80E-01 |
| <i>THC2437252</i>      | 1,02  | 4,11E-01 | 6,80E-01 |
| <i>C19orf40</i>        | -1,03 | 4,11E-01 | 6,81E-01 |
| <i>UBE2N</i>           | 1,04  | 4,11E-01 | 6,81E-01 |
| <i>THC2440217</i>      | -1,05 | 4,11E-01 | 6,81E-01 |
| <i>A_24_P917668</i>    | -1,20 | 4,11E-01 | 6,81E-01 |
| <i>KRT4</i>            | -1,45 | 4,12E-01 | 6,81E-01 |
| <i>CRHBP</i>           | -1,08 | 4,12E-01 | 6,81E-01 |
| <i>BE749146</i>        | -1,04 | 4,12E-01 | 6,81E-01 |
| <i>CHCHD4</i>          | -1,03 | 4,12E-01 | 6,81E-01 |
| <i>UBE2E3</i>          | 1,05  | 4,12E-01 | 6,81E-01 |
| <i>AK024870</i>        | -1,06 | 4,12E-01 | 6,81E-01 |

|                        |       |          |          |
|------------------------|-------|----------|----------|
| <i>TCEAL7</i>          | 1,04  | 4,12E-01 | 6,81E-01 |
| <i>A_24_P654368</i>    | -1,03 | 4,12E-01 | 6,82E-01 |
| <i>C9orf66</i>         | -1,04 | 4,12E-01 | 6,82E-01 |
| <i>TAF9B</i>           | -1,02 | 4,12E-01 | 6,82E-01 |
| <i>AI056689</i>        | -1,02 | 4,12E-01 | 6,82E-01 |
| <i>KCNQ4</i>           | 1,03  | 4,12E-01 | 6,82E-01 |
| <i>LOC56902</i>        | 1,04  | 4,12E-01 | 6,82E-01 |
| <i>NKD2</i>            | 1,07  | 4,12E-01 | 6,82E-01 |
| <i>AL565181</i>        | 1,04  | 4,12E-01 | 6,82E-01 |
| <i>TAS2R44</i>         | -1,04 | 4,13E-01 | 6,82E-01 |
| <i>MYO6</i>            | 1,05  | 4,13E-01 | 6,82E-01 |
| <i>AK022893</i>        | 1,03  | 4,13E-01 | 6,82E-01 |
| <i>C6orf148</i>        | -1,06 | 4,13E-01 | 6,82E-01 |
| <i>PPIL2</i>           | -1,03 | 4,13E-01 | 6,82E-01 |
| <i>BC015434</i>        | 1,05  | 4,13E-01 | 6,82E-01 |
| <i>KLHDC8A</i>         | -1,12 | 4,13E-01 | 6,82E-01 |
| <i>AK000336</i>        | -1,04 | 4,13E-01 | 6,82E-01 |
| <i>ZNF10</i>           | -1,03 | 4,13E-01 | 6,82E-01 |
| <i>APIP</i>            | -1,03 | 4,13E-01 | 6,82E-01 |
| <i>CYBASC3</i>         | -1,03 | 4,13E-01 | 6,82E-01 |
| <i>A_24_P324224</i>    | -1,03 | 4,13E-01 | 6,82E-01 |
| <i>AK023072</i>        | 1,03  | 4,13E-01 | 6,82E-01 |
| <i>INPP5F</i>          | 1,04  | 4,13E-01 | 6,82E-01 |
| <i>CCDC108</i>         | 1,05  | 4,13E-01 | 6,82E-01 |
| <i>HAS1</i>            | 1,12  | 4,13E-01 | 6,82E-01 |
| <i>A_23_P140454</i>    | 1,14  | 4,13E-01 | 6,82E-01 |
| <i>ENST00000311208</i> | 1,20  | 4,13E-01 | 6,82E-01 |
| <i>DKFZp761H2121</i>   | -1,04 | 4,13E-01 | 6,82E-01 |
| <i>AK092715</i>        | -1,09 | 4,13E-01 | 6,83E-01 |
| <i>AI823874</i>        | -1,03 | 4,13E-01 | 6,83E-01 |
| <i>OR6A2</i>           | -1,03 | 4,13E-01 | 6,83E-01 |
| <i>CR12</i>            | 1,03  | 4,13E-01 | 6,83E-01 |
| <i>ENST00000355104</i> | 1,03  | 4,13E-01 | 6,83E-01 |
| <i>PLAC2</i>           | 1,04  | 4,13E-01 | 6,83E-01 |
| <i>THC2406366</i>      | 1,04  | 4,13E-01 | 6,83E-01 |
| <i>LOC400027</i>       | -1,04 | 4,14E-01 | 6,83E-01 |
| <i>TRPV3</i>           | 1,02  | 4,14E-01 | 6,83E-01 |
| <i>PRDX2</i>           | -1,04 | 4,14E-01 | 6,83E-01 |
| <i>NANP</i>            | 1,02  | 4,14E-01 | 6,83E-01 |
| <i>UNC5B</i>           | 1,07  | 4,14E-01 | 6,83E-01 |
| <i>A_24_P923415</i>    | -1,03 | 4,14E-01 | 6,83E-01 |
| <i>ZNF462</i>          | -1,04 | 4,14E-01 | 6,83E-01 |
| <i>A_24_P936637</i>    | -1,03 | 4,14E-01 | 6,83E-01 |
| <i>IL28A</i>           | -1,03 | 4,14E-01 | 6,83E-01 |

|                        |       |          |          |
|------------------------|-------|----------|----------|
| <i>AF274942</i>        | 1,03  | 4,14E-01 | 6,83E-01 |
| <i>MCEMP1</i>          | 1,07  | 4,14E-01 | 6,83E-01 |
| <i>A_32_P198552</i>    | 1,03  | 4,14E-01 | 6,83E-01 |
| <i>SULF2</i>           | -1,12 | 4,14E-01 | 6,83E-01 |
| <i>THC2339102</i>      | -1,04 | 4,14E-01 | 6,83E-01 |
| <i>THC2440509</i>      | -1,03 | 4,14E-01 | 6,83E-01 |
| <i>CDKN2C</i>          | 1,06  | 4,14E-01 | 6,83E-01 |
| <i>ZNF238</i>          | 1,03  | 4,14E-01 | 6,83E-01 |
| <i>AK074562</i>        | 1,05  | 4,14E-01 | 6,83E-01 |
| <i>SRRM1</i>           | 1,03  | 4,14E-01 | 6,83E-01 |
| <i>A_32_P159289</i>    | 1,08  | 4,14E-01 | 6,83E-01 |
| <i>GPR137</i>          | 1,04  | 4,14E-01 | 6,83E-01 |
| <i>ENST00000376881</i> | 1,04  | 4,14E-01 | 6,83E-01 |
| <i>A_24_P135515</i>    | 1,03  | 4,15E-01 | 6,84E-01 |
| <i>ZNF254</i>          | -1,04 | 4,15E-01 | 6,84E-01 |
| <i>AF086288</i>        | -1,03 | 4,15E-01 | 6,84E-01 |
| <i>DULLARD</i>         | -1,03 | 4,15E-01 | 6,84E-01 |
| <i>ARL10</i>           | -1,04 | 4,15E-01 | 6,84E-01 |
| <i>ENST00000334591</i> | -1,03 | 4,15E-01 | 6,84E-01 |
| <i>POU3F3</i>          | 1,06  | 4,15E-01 | 6,84E-01 |
| <i>A_24_P572303</i>    | 1,04  | 4,15E-01 | 6,84E-01 |
| <i>AK124568</i>        | -1,09 | 4,15E-01 | 6,84E-01 |
| <i>BRP44L</i>          | 1,04  | 4,15E-01 | 6,84E-01 |
| <i>S66917</i>          | 1,03  | 4,15E-01 | 6,84E-01 |
| <i>BCL2A1</i>          | -1,06 | 4,15E-01 | 6,84E-01 |
| <i>BI710972</i>        | -1,04 | 4,15E-01 | 6,84E-01 |
| <i>A_24_P928467</i>    | 1,03  | 4,15E-01 | 6,84E-01 |
| <i>NPHP1</i>           | 1,03  | 4,15E-01 | 6,84E-01 |
| <i>RTP1</i>            | 1,03  | 4,15E-01 | 6,84E-01 |
| <i>C6orf165</i>        | 1,04  | 4,15E-01 | 6,84E-01 |
| <i>PIP5K1C</i>         | 1,06  | 4,15E-01 | 6,84E-01 |
| <i>HES2</i>            | -1,13 | 4,15E-01 | 6,84E-01 |
| <i>ABCA8</i>           | -1,09 | 4,15E-01 | 6,84E-01 |
| <i>AK026697</i>        | -1,07 | 4,16E-01 | 6,84E-01 |
| <i>LGP2</i>            | -1,04 | 4,15E-01 | 6,84E-01 |
| <i>PNLDC1</i>          | -1,04 | 4,16E-01 | 6,84E-01 |
| <i>Z99394</i>          | -1,03 | 4,16E-01 | 6,84E-01 |
| <i>FLJ33590</i>        | -1,03 | 4,16E-01 | 6,84E-01 |
| <i>GLRX5</i>           | -1,03 | 4,15E-01 | 6,84E-01 |
| <i>SNURF</i>           | 1,03  | 4,15E-01 | 6,84E-01 |
| <i>THC2318441</i>      | 1,03  | 4,15E-01 | 6,84E-01 |
| <i>REEP5</i>           | 1,03  | 4,15E-01 | 6,84E-01 |
| <i>AK128413</i>        | 1,03  | 4,15E-01 | 6,84E-01 |
| <i>BC047032</i>        | 1,04  | 4,15E-01 | 6,84E-01 |

|                        |       |          |          |
|------------------------|-------|----------|----------|
| <i>SCO2</i>            | 1,05  | 4,16E-01 | 6,84E-01 |
| <i>ALDH3A1</i>         | 1,07  | 4,16E-01 | 6,84E-01 |
| <i>TMEM88</i>          | 1,08  | 4,16E-01 | 6,84E-01 |
| <i>MYL9</i>            | 1,12  | 4,16E-01 | 6,84E-01 |
| <i>SRBD1</i>           | -1,04 | 4,16E-01 | 6,84E-01 |
| <i>RASSF5</i>          | -1,04 | 4,16E-01 | 6,84E-01 |
| <i>A_24_P398370</i>    | 1,12  | 4,16E-01 | 6,84E-01 |
| <i>SOCS7</i>           | 1,02  | 4,16E-01 | 6,84E-01 |
| <i>CCNF</i>            | 1,02  | 4,16E-01 | 6,84E-01 |
| <i>ACO2</i>            | 1,04  | 4,16E-01 | 6,84E-01 |
| <i>OR5V1</i>           | 1,04  | 4,16E-01 | 6,84E-01 |
| <i>TMEM104</i>         | -1,04 | 4,16E-01 | 6,85E-01 |
| <i>MED12L</i>          | -1,04 | 4,16E-01 | 6,85E-01 |
| <i>AK025762</i>        | -1,03 | 4,16E-01 | 6,85E-01 |
| <i>STK4</i>            | -1,02 | 4,16E-01 | 6,85E-01 |
| <i>C21orf86</i>        | 1,03  | 4,16E-01 | 6,85E-01 |
| <i>MOBKL2C</i>         | 1,03  | 4,16E-01 | 6,85E-01 |
| <i>ENST00000295989</i> | 1,04  | 4,16E-01 | 6,85E-01 |
| <i>THC2381848</i>      | 1,07  | 4,16E-01 | 6,85E-01 |
| <i>C14orf58</i>        | -1,04 | 4,16E-01 | 6,85E-01 |
| <i>PLA2G4D</i>         | -1,03 | 4,16E-01 | 6,85E-01 |
| <i>PTCHD2</i>          | -1,03 | 4,16E-01 | 6,85E-01 |
| <i>TRIM74</i>          | -1,03 | 4,16E-01 | 6,85E-01 |
| <i>TMEM132D</i>        | -1,03 | 4,16E-01 | 6,85E-01 |
| <i>AF113012</i>        | -1,03 | 4,16E-01 | 6,85E-01 |
| <i>A_32_P125549</i>    | -1,02 | 4,16E-01 | 6,85E-01 |
| <i>THC2342752</i>      | -1,02 | 4,17E-01 | 6,85E-01 |
| <i>A_32_P12122</i>     | 1,03  | 4,16E-01 | 6,85E-01 |
| <i>CHST7</i>           | 1,08  | 4,16E-01 | 6,85E-01 |
| <i>PLXNB1</i>          | 1,06  | 4,17E-01 | 6,85E-01 |
| <i>SMAD4</i>           | 1,03  | 4,17E-01 | 6,85E-01 |
| <i>MRFAP1L1</i>        | -1,03 | 4,17E-01 | 6,85E-01 |
| <i>ABCC13</i>          | -1,02 | 4,17E-01 | 6,85E-01 |
| <i>TSC22D1</i>         | 1,08  | 4,17E-01 | 6,85E-01 |
| <i>THC2438327</i>      | 1,04  | 4,17E-01 | 6,85E-01 |
| <i>THC2444634</i>      | 1,06  | 4,17E-01 | 6,85E-01 |
| <i>A_24_P793228</i>    | -1,03 | 4,17E-01 | 6,85E-01 |
| <i>THC2285869</i>      | -1,03 | 4,17E-01 | 6,85E-01 |
| <i>IDH2</i>            | 1,11  | 4,17E-01 | 6,85E-01 |
| <i>AF146694</i>        | -1,04 | 4,17E-01 | 6,85E-01 |
| <i>AK092138</i>        | -1,03 | 4,17E-01 | 6,85E-01 |
| <i>A_24_P585004</i>    | -1,03 | 4,17E-01 | 6,85E-01 |
| <i>PRSS27</i>          | -1,09 | 4,17E-01 | 6,85E-01 |
| <i>THC2404671</i>      | -1,03 | 4,17E-01 | 6,85E-01 |

|                        |       |          |          |
|------------------------|-------|----------|----------|
| <i>BX100997</i>        | 1,02  | 4,17E-01 | 6,85E-01 |
| <i>TRAF6</i>           | 1,03  | 4,17E-01 | 6,85E-01 |
| <i>PRAMEF10</i>        | 1,03  | 4,17E-01 | 6,85E-01 |
| <i>C11orf64</i>        | -1,02 | 4,17E-01 | 6,85E-01 |
| <i>DMPK</i>            | 1,09  | 4,17E-01 | 6,85E-01 |
| <i>CR625109</i>        | -1,04 | 4,17E-01 | 6,85E-01 |
| <i>COPS3</i>           | 1,03  | 4,17E-01 | 6,85E-01 |
| <i>C3orf15</i>         | -1,04 | 4,17E-01 | 6,85E-01 |
| <i>ZNF432</i>          | -1,03 | 4,17E-01 | 6,85E-01 |
| <i>A_23_P121234</i>    | -1,09 | 4,18E-01 | 6,85E-01 |
| <i>RAB38</i>           | -1,08 | 4,18E-01 | 6,86E-01 |
| <i>THC2375712</i>      | -1,04 | 4,18E-01 | 6,86E-01 |
| <i>BSCL2</i>           | -1,02 | 4,18E-01 | 6,86E-01 |
| <i>NOL7</i>            | 1,03  | 4,18E-01 | 6,86E-01 |
| <i>AK095554</i>        | 1,02  | 4,18E-01 | 6,86E-01 |
| <i>BX115137</i>        | 1,03  | 4,18E-01 | 6,86E-01 |
| <i>RG9MTD2</i>         | -1,04 | 4,18E-01 | 6,86E-01 |
| <i>FAT4</i>            | -1,05 | 4,18E-01 | 6,86E-01 |
| <i>BC008624</i>        | -1,04 | 4,18E-01 | 6,86E-01 |
| <i>A_32_P166152</i>    | 1,03  | 4,18E-01 | 6,86E-01 |
| <i>FAM104A</i>         | -1,02 | 4,18E-01 | 6,86E-01 |
| <i>CYP2J2</i>          | -1,08 | 4,18E-01 | 6,86E-01 |
| <i>A_32_P40375</i>     | -1,05 | 4,18E-01 | 6,86E-01 |
| <i>THC2406658</i>      | -1,04 | 4,18E-01 | 6,86E-01 |
| <i>SCYL1</i>           | -1,03 | 4,18E-01 | 6,86E-01 |
| <i>ASCC2</i>           | -1,03 | 4,18E-01 | 6,86E-01 |
| <i>ENST00000328474</i> | -1,05 | 4,18E-01 | 6,86E-01 |
| <i>ANAPC7</i>          | -1,04 | 4,18E-01 | 6,86E-01 |
| <i>BM978707</i>        | -1,04 | 4,18E-01 | 6,86E-01 |
| <i>MGC21830</i>        | -1,03 | 4,18E-01 | 6,86E-01 |
| <i>A_32_P226338</i>    | -1,03 | 4,18E-01 | 6,86E-01 |
| <i>THC2392297</i>      | -1,03 | 4,18E-01 | 6,86E-01 |
| <i>AY116216</i>        | 1,03  | 4,18E-01 | 6,86E-01 |
| <i>HRH2</i>            | 1,02  | 4,18E-01 | 6,86E-01 |
| <i>AW291149</i>        | -1,08 | 4,18E-01 | 6,86E-01 |
| <i>SALL4</i>           | 1,03  | 4,18E-01 | 6,86E-01 |
| <i>A_23_P206135</i>    | 1,03  | 4,19E-01 | 6,86E-01 |
| <i>KRTAP4-4</i>        | -1,05 | 4,19E-01 | 6,86E-01 |
| <i>A_24_P358606</i>    | 1,04  | 4,19E-01 | 6,86E-01 |
| <i>NOS2A</i>           | -1,04 | 4,19E-01 | 6,86E-01 |
| <i>LOC116349</i>       | -1,04 | 4,19E-01 | 6,86E-01 |
| <i>A_24_P931711</i>    | 1,03  | 4,19E-01 | 6,86E-01 |
| <i>LOC138652</i>       | 1,03  | 4,19E-01 | 6,86E-01 |
| <i>AK095453</i>        | 1,05  | 4,19E-01 | 6,86E-01 |



|                        |       |          |          |
|------------------------|-------|----------|----------|
| <i>OSBPL7</i>          | -1,03 | 4,19E-01 | 6,87E-01 |
| <i>AF060168</i>        | -1,03 | 4,19E-01 | 6,87E-01 |
| <i>IRAK2</i>           | 1,04  | 4,19E-01 | 6,87E-01 |
| <i>TAS2R49</i>         | -1,05 | 4,19E-01 | 6,87E-01 |
| <i>A_24_P837085</i>    | 1,03  | 4,19E-01 | 6,87E-01 |
| <i>ENST00000366539</i> | 1,06  | 4,19E-01 | 6,87E-01 |
| <i>TAS1R1</i>          | 1,03  | 4,19E-01 | 6,87E-01 |
| <i>FGF4</i>            | 1,03  | 4,19E-01 | 6,87E-01 |
| <i>THC2279505</i>      | -1,08 | 4,19E-01 | 6,87E-01 |
| <i>MAGEC1</i>          | 1,03  | 4,19E-01 | 6,87E-01 |
| <i>THC2391112</i>      | 1,03  | 4,19E-01 | 6,87E-01 |
| <i>A_24_P75708</i>     | 1,06  | 4,19E-01 | 6,87E-01 |
| <i>NCOA6IP</i>         | -1,03 | 4,20E-01 | 6,87E-01 |
| <i>AK026647</i>        | 1,02  | 4,20E-01 | 6,87E-01 |
| <i>PCDHAC2</i>         | -1,03 | 4,20E-01 | 6,87E-01 |
| <i>ENST00000355828</i> | -1,03 | 4,20E-01 | 6,87E-01 |
| <i>SNAPC5</i>          | 1,04  | 4,20E-01 | 6,87E-01 |
| <i>BC053363</i>        | 1,04  | 4,20E-01 | 6,87E-01 |
| <i>AP1S3</i>           | 1,04  | 4,20E-01 | 6,87E-01 |
| <i>THC2426677</i>      | -1,04 | 4,20E-01 | 6,87E-01 |
| <i>BC063381</i>        | -1,03 | 4,20E-01 | 6,87E-01 |
| <i>LOC654152</i>       | -1,03 | 4,20E-01 | 6,87E-01 |
| <i>NDUFS4</i>          | 1,02  | 4,20E-01 | 6,87E-01 |
| <i>SOST</i>            | 1,21  | 4,20E-01 | 6,87E-01 |
| <i>C11orf30</i>        | -1,03 | 4,20E-01 | 6,87E-01 |
| <i>AK024092</i>        | 1,04  | 4,20E-01 | 6,87E-01 |
| <i>CD633154</i>        | -1,07 | 4,20E-01 | 6,87E-01 |
| <i>MS4A6E</i>          | -1,04 | 4,20E-01 | 6,87E-01 |
| <i>SMYD2</i>           | 1,04  | 4,20E-01 | 6,87E-01 |
| <i>CTSL</i>            | 1,05  | 4,20E-01 | 6,87E-01 |
| <i>AF007192</i>        | 1,07  | 4,20E-01 | 6,87E-01 |
| <i>U2AF1</i>           | -1,03 | 4,20E-01 | 6,88E-01 |
| <i>ATP5D</i>           | 1,03  | 4,20E-01 | 6,88E-01 |
| <i>A_24_P670147</i>    | 1,04  | 4,20E-01 | 6,88E-01 |
| <i>C20orf10</i>        | -1,03 | 4,20E-01 | 6,88E-01 |
| <i>TRIP6</i>           | -1,03 | 4,20E-01 | 6,88E-01 |
| <i>SNRPD1</i>          | 1,03  | 4,20E-01 | 6,88E-01 |
| <i>OIT3</i>            | 1,03  | 4,21E-01 | 6,88E-01 |
| <i>FAM82A</i>          | -1,05 | 4,21E-01 | 6,88E-01 |
| <i>AK091677</i>        | -1,05 | 4,21E-01 | 6,88E-01 |
| <i>AY358211</i>        | -1,04 | 4,21E-01 | 6,88E-01 |
| <i>AK023954</i>        | -1,03 | 4,21E-01 | 6,88E-01 |
| <i>APBB3</i>           | -1,04 | 4,21E-01 | 6,88E-01 |
| <i>C18orf56</i>        | -1,04 | 4,21E-01 | 6,88E-01 |

|                        |       |          |          |
|------------------------|-------|----------|----------|
| <i>SOD3</i>            | 1,05  | 4,21E-01 | 6,88E-01 |
| <i>KRT2</i>            | -1,24 | 4,21E-01 | 6,88E-01 |
| <i>THC2440851</i>      | -1,09 | 4,21E-01 | 6,88E-01 |
| <i>A_24_P557890</i>    | -1,04 | 4,21E-01 | 6,88E-01 |
| <i>AKO25353</i>        | -1,03 | 4,21E-01 | 6,88E-01 |
| <i>A_24_P178475</i>    | -1,03 | 4,21E-01 | 6,88E-01 |
| <i>A_24_P863363</i>    | -1,02 | 4,21E-01 | 6,88E-01 |
| <i>THC2282190</i>      | 1,03  | 4,21E-01 | 6,88E-01 |
| <i>ADAMTSL2</i>        | 1,07  | 4,21E-01 | 6,88E-01 |
| <i>PSPH</i>            | -1,10 | 4,21E-01 | 6,88E-01 |
| <i>C1orf101</i>        | -1,03 | 4,21E-01 | 6,88E-01 |
| <i>A_24_P901084</i>    | 1,03  | 4,21E-01 | 6,88E-01 |
| <i>ZNF582</i>          | -1,03 | 4,21E-01 | 6,88E-01 |
| <i>SPAG1</i>           | 1,02  | 4,21E-01 | 6,88E-01 |
| <i>THC2418246</i>      | 1,03  | 4,21E-01 | 6,88E-01 |
| <i>A_24_P315256</i>    | 1,11  | 4,21E-01 | 6,88E-01 |
| <i>THC2304800</i>      | -1,03 | 4,21E-01 | 6,88E-01 |
| <i>P2RXL1</i>          | -1,04 | 4,21E-01 | 6,88E-01 |
| <i>THC2320660</i>      | -1,02 | 4,21E-01 | 6,88E-01 |
| <i>KIAA0895</i>        | -1,03 | 4,22E-01 | 6,88E-01 |
| <i>SLC35E1</i>         | -1,02 | 4,22E-01 | 6,88E-01 |
| <i>THC2275450</i>      | -1,03 | 4,22E-01 | 6,89E-01 |
| <i>LOC283152</i>       | -1,03 | 4,22E-01 | 6,89E-01 |
| <i>THC2390306</i>      | 1,04  | 4,22E-01 | 6,89E-01 |
| <i>DCP_20_9</i>        | 1,04  | 4,22E-01 | 6,89E-01 |
| <i>RPP25</i>           | 1,07  | 4,22E-01 | 6,89E-01 |
| <i>A_24_P289043</i>    | -1,03 | 4,22E-01 | 6,89E-01 |
| <i>A_24_P75469</i>     | -1,02 | 4,22E-01 | 6,89E-01 |
| <i>AP3S1</i>           | -1,04 | 4,22E-01 | 6,89E-01 |
| <i>ENST00000360738</i> | -1,03 | 4,22E-01 | 6,89E-01 |
| <i>CCDC7</i>           | -1,03 | 4,22E-01 | 6,89E-01 |
| <i>U69195</i>          | -1,03 | 4,22E-01 | 6,89E-01 |
| <i>CR605719</i>        | -1,03 | 4,22E-01 | 6,89E-01 |
| <i>ENST00000300458</i> | 1,02  | 4,22E-01 | 6,89E-01 |
| <i>EDG5</i>            | 1,02  | 4,22E-01 | 6,89E-01 |
| <i>AY660577</i>        | 1,03  | 4,22E-01 | 6,89E-01 |
| <i>PCAF</i>            | 1,03  | 4,22E-01 | 6,89E-01 |
| <i>SESN2</i>           | 1,04  | 4,22E-01 | 6,89E-01 |
| <i>MBTPS2</i>          | 1,04  | 4,22E-01 | 6,89E-01 |
| <i>KIAA1522</i>        | 1,05  | 4,22E-01 | 6,89E-01 |
| <i>THC2351531</i>      | 1,08  | 4,22E-01 | 6,89E-01 |
| <i>BX118153</i>        | 1,03  | 4,22E-01 | 6,89E-01 |
| <i>SOCS2</i>           | -1,06 | 4,22E-01 | 6,89E-01 |
| <i>HLA-DRB5</i>        | -1,05 | 4,22E-01 | 6,89E-01 |

|                      |       |          |          |
|----------------------|-------|----------|----------|
| <i>C1orf179</i>      | -1,03 | 4,22E-01 | 6,89E-01 |
| <i>A_32_P66025</i>   | -1,03 | 4,22E-01 | 6,89E-01 |
| <i>ANGPTL2</i>       | 1,06  | 4,22E-01 | 6,89E-01 |
| <i>A_24_P50601</i>   | 1,04  | 4,22E-01 | 6,89E-01 |
| <i>ATP12A</i>        | 1,03  | 4,22E-01 | 6,89E-01 |
| <i>DKFZp76112123</i> | -1,02 | 4,23E-01 | 6,89E-01 |
| <i>RIMS2</i>         | 1,07  | 4,23E-01 | 6,89E-01 |
| <i>A1076343</i>      | 1,03  | 4,23E-01 | 6,89E-01 |
| <i>AW449150</i>      | 1,04  | 4,23E-01 | 6,89E-01 |
| <i>KIAA0367</i>      | -1,17 | 4,23E-01 | 6,89E-01 |
| <i>A_32_P170436</i>  | -1,04 | 4,23E-01 | 6,89E-01 |
| <i>ZFR</i>           | -1,03 | 4,23E-01 | 6,89E-01 |
| <i>THC2233630</i>    | 1,03  | 4,23E-01 | 6,89E-01 |
| <i>MRGPRD</i>        | 1,03  | 4,23E-01 | 6,89E-01 |
| <i>BC011942</i>      | 1,03  | 4,23E-01 | 6,89E-01 |
| <i>PGLYRP2</i>       | -1,11 | 4,23E-01 | 6,90E-01 |
| <i>CBFA2T3</i>       | -1,06 | 4,23E-01 | 6,90E-01 |
| <i>FLJ32790</i>      | -1,04 | 4,23E-01 | 6,90E-01 |
| <i>AF116632</i>      | -1,03 | 4,23E-01 | 6,90E-01 |
| <i>A_24_P375586</i>  | -1,03 | 4,23E-01 | 6,90E-01 |
| <i>SGK2</i>          | -1,03 | 4,23E-01 | 6,90E-01 |
| <i>WDR34</i>         | -1,03 | 4,23E-01 | 6,90E-01 |
| <i>C15orf38</i>      | 1,02  | 4,23E-01 | 6,90E-01 |
| <i>A_24_P315594</i>  | 1,03  | 4,23E-01 | 6,90E-01 |
| <i>AK025037</i>      | 1,03  | 4,23E-01 | 6,90E-01 |
| <i>LOC474358</i>     | -1,03 | 4,23E-01 | 6,90E-01 |
| <i>UCK1</i>          | 1,03  | 4,23E-01 | 6,90E-01 |
| <i>CR744880</i>      | 1,03  | 4,23E-01 | 6,90E-01 |
| <i>BC011648</i>      | -1,03 | 4,24E-01 | 6,90E-01 |
| <i>AK125603</i>      | 1,03  | 4,24E-01 | 6,90E-01 |
| <i>CLDN4</i>         | 1,12  | 4,24E-01 | 6,90E-01 |
| <i>MGC26356</i>      | 1,03  | 4,24E-01 | 6,90E-01 |
| <i>SNAP29</i>        | -1,03 | 4,24E-01 | 6,90E-01 |
| <i>OLFM4</i>         | 1,12  | 4,24E-01 | 6,90E-01 |
| <i>DDO</i>           | -1,04 | 4,24E-01 | 6,90E-01 |
| <i>IL9R</i>          | 1,02  | 4,24E-01 | 6,90E-01 |
| <i>A_24_P230313</i>  | 1,03  | 4,24E-01 | 6,90E-01 |
| <i>CA423842</i>      | -1,04 | 4,24E-01 | 6,90E-01 |
| <i>GRIN2B</i>        | 1,03  | 4,24E-01 | 6,90E-01 |
| <i>THC2316420</i>    | 1,03  | 4,24E-01 | 6,90E-01 |
| <i>NINJ1</i>         | 1,05  | 4,24E-01 | 6,90E-01 |
| <i>A_24_P144625</i>  | 1,03  | 4,24E-01 | 6,91E-01 |
| <i>A_32_P112546</i>  | -1,04 | 4,24E-01 | 6,91E-01 |
| <i>RPL38</i>         | -1,04 | 4,24E-01 | 6,91E-01 |

|                        |       |          |          |
|------------------------|-------|----------|----------|
| <i>BE388027</i>        | -1,03 | 4,25E-01 | 6,91E-01 |
| <i>A_32_P222612</i>    | -1,05 | 4,25E-01 | 6,91E-01 |
| <i>AK094115</i>        | -1,05 | 4,25E-01 | 6,91E-01 |
| <i>KIAA1509</i>        | 1,04  | 4,25E-01 | 6,91E-01 |
| <i>BX104354</i>        | -1,03 | 4,25E-01 | 6,91E-01 |
| <i>AF086044</i>        | 1,05  | 4,25E-01 | 6,91E-01 |
| <i>ENST00000270642</i> | 1,06  | 4,25E-01 | 6,91E-01 |
| <i>FKBP5</i>           | -1,08 | 4,25E-01 | 6,91E-01 |
| <i>ENST00000360041</i> | -1,04 | 4,25E-01 | 6,91E-01 |
| <i>A_24_P940952</i>    | -1,04 | 4,25E-01 | 6,91E-01 |
| <i>DMBX1</i>           | -1,03 | 4,25E-01 | 6,91E-01 |
| <i>LOC645397</i>       | -1,03 | 4,25E-01 | 6,91E-01 |
| <i>MORN3</i>           | -1,03 | 4,25E-01 | 6,91E-01 |
| <i>IRAK4</i>           | 1,03  | 4,25E-01 | 6,91E-01 |
| <i>LDHC</i>            | 1,03  | 4,25E-01 | 6,91E-01 |
| <i>AY358202</i>        | 1,04  | 4,25E-01 | 6,91E-01 |
| <i>FAM47A</i>          | 1,05  | 4,25E-01 | 6,91E-01 |
| <i>MUC1</i>            | 1,10  | 4,25E-01 | 6,91E-01 |
| <i>CRLF3</i>           | -1,02 | 4,25E-01 | 6,91E-01 |
| <i>URG4</i>            | 1,02  | 4,25E-01 | 6,91E-01 |
| <i>A_32_P109165</i>    | 1,03  | 4,25E-01 | 6,91E-01 |
| <i>THC2278819</i>      | -1,03 | 4,25E-01 | 6,91E-01 |
| <i>LOC645238</i>       | 1,04  | 4,25E-01 | 6,91E-01 |
| <i>ZNF382</i>          | 1,04  | 4,25E-01 | 6,91E-01 |
| <i>40422</i>           | 1,03  | 4,26E-01 | 6,92E-01 |
| <i>AK095841</i>        | -1,07 | 4,26E-01 | 6,92E-01 |
| <i>BC048213</i>        | -1,04 | 4,26E-01 | 6,92E-01 |
| <i>A_24_P917759</i>    | -1,03 | 4,26E-01 | 6,92E-01 |
| <i>DUS2L</i>           | -1,03 | 4,26E-01 | 6,92E-01 |
| <i>COL2A1</i>          | 1,03  | 4,26E-01 | 6,92E-01 |
| <i>MRPL14</i>          | 1,03  | 4,26E-01 | 6,92E-01 |
| <i>AK095225</i>        | 1,02  | 4,26E-01 | 6,92E-01 |
| <i>EFNA1</i>           | -1,06 | 4,26E-01 | 6,92E-01 |
| <i>ENST00000379841</i> | -1,04 | 4,26E-01 | 6,92E-01 |
| <i>AA854957</i>        | -1,04 | 4,26E-01 | 6,92E-01 |
| <i>C6orf50</i>         | -1,03 | 4,26E-01 | 6,92E-01 |
| <i>INTS3</i>           | -1,03 | 4,26E-01 | 6,92E-01 |
| <i>AL137472</i>        | -1,03 | 4,26E-01 | 6,92E-01 |
| <i>ZNF313</i>          | -1,02 | 4,26E-01 | 6,92E-01 |
| <i>THC2438818</i>      | 1,03  | 4,26E-01 | 6,92E-01 |
| <i>RASGRP3</i>         | 1,05  | 4,26E-01 | 6,92E-01 |
| <i>MFRP</i>            | 1,06  | 4,26E-01 | 6,92E-01 |
| <i>S100P</i>           | 1,14  | 4,26E-01 | 6,92E-01 |
| <i>ABCC3</i>           | -1,13 | 4,26E-01 | 6,92E-01 |

|                        |       |          |          |
|------------------------|-------|----------|----------|
| <i>THC2370681</i>      | -1,04 | 4,26E-01 | 6,92E-01 |
| <i>LOC401176</i>       | 1,03  | 4,26E-01 | 6,92E-01 |
| <i>A_24_P827738</i>    | -1,04 | 4,26E-01 | 6,92E-01 |
| <i>RC4</i>             | 1,02  | 4,26E-01 | 6,92E-01 |
| <i>CEP68</i>           | -1,04 | 4,26E-01 | 6,92E-01 |
| <i>ITGB1BP1</i>        | 1,05  | 4,26E-01 | 6,92E-01 |
| <i>THC2304714</i>      | -1,06 | 4,27E-01 | 6,92E-01 |
| <i>NEUROG3</i>         | 1,08  | 4,27E-01 | 6,92E-01 |
| <i>AK024824</i>        | -1,04 | 4,27E-01 | 6,92E-01 |
| <i>AI676130</i>        | -1,03 | 4,27E-01 | 6,92E-01 |
| <i>ENST00000319043</i> | 1,03  | 4,27E-01 | 6,92E-01 |
| <i>ENO1B</i>           | 1,10  | 4,27E-01 | 6,92E-01 |
| <i>COL5A2</i>          | -1,12 | 4,27E-01 | 6,92E-01 |
| <i>THC2283716</i>      | -1,02 | 4,27E-01 | 6,92E-01 |
| <i>C11orf71</i>        | 1,03  | 4,27E-01 | 6,92E-01 |
| <i>BM874185</i>        | 1,04  | 4,27E-01 | 6,92E-01 |
| <i>MAS1</i>            | 1,04  | 4,27E-01 | 6,92E-01 |
| <i>A_23_P399579</i>    | -1,05 | 4,27E-01 | 6,92E-01 |
| <i>C11orf46</i>        | -1,03 | 4,27E-01 | 6,92E-01 |
| <i>AI803364</i>        | -1,04 | 4,27E-01 | 6,92E-01 |
| <i>BAG4</i>            | 1,02  | 4,27E-01 | 6,92E-01 |
| <i>RBM25</i>           | 1,03  | 4,27E-01 | 6,92E-01 |
| <i>AK000815</i>        | 1,04  | 4,27E-01 | 6,93E-01 |
| <i>MERTK</i>           | -1,06 | 4,27E-01 | 6,93E-01 |
| <i>C16orf52</i>        | -1,03 | 4,27E-01 | 6,93E-01 |
| <i>DPY19L2</i>         | -1,05 | 4,27E-01 | 6,93E-01 |
| <i>CA7</i>             | 1,03  | 4,27E-01 | 6,93E-01 |
| <i>AK091338</i>        | 1,12  | 4,27E-01 | 6,93E-01 |
| <i>KRT10</i>           | 1,13  | 4,27E-01 | 6,93E-01 |
| <i>LOC645737</i>       | -1,03 | 4,27E-01 | 6,93E-01 |
| <i>AK074776</i>        | -1,07 | 4,28E-01 | 6,93E-01 |
| <i>ACD</i>             | 1,03  | 4,28E-01 | 6,93E-01 |
| <i>RAB11FIP2</i>       | -1,04 | 4,28E-01 | 6,93E-01 |
| <i>A_24_P911306</i>    | -1,03 | 4,28E-01 | 6,93E-01 |
| <i>RDH16</i>           | -1,03 | 4,28E-01 | 6,93E-01 |
| <i>ZBTB40</i>          | -1,02 | 4,28E-01 | 6,93E-01 |
| <i>PIP</i>             | 1,12  | 4,28E-01 | 6,93E-01 |
| <i>A_24_P349636</i>    | -1,03 | 4,28E-01 | 6,93E-01 |
| <i>AGBL3</i>           | 1,02  | 4,28E-01 | 6,93E-01 |
| <i>SURF2</i>           | 1,02  | 4,28E-01 | 6,93E-01 |
| <i>A_24_P17437</i>     | 1,02  | 4,28E-01 | 6,93E-01 |
| <i>ENST00000382544</i> | 1,02  | 4,28E-01 | 6,93E-01 |
| <i>W92806</i>          | -1,03 | 4,28E-01 | 6,93E-01 |
| <i>THC2442023</i>      | 1,04  | 4,28E-01 | 6,93E-01 |

|                        |       |          |          |
|------------------------|-------|----------|----------|
| <i>THC2296439</i>      | 1,04  | 4,28E-01 | 6,94E-01 |
| <i>A_24_P919388</i>    | 1,03  | 4,28E-01 | 6,94E-01 |
| <i>A_32_P11425</i>     | 1,07  | 4,28E-01 | 6,94E-01 |
| <i>FLJ12151</i>        | -1,02 | 4,28E-01 | 6,94E-01 |
| <i>THC2414226</i>      | 1,03  | 4,28E-01 | 6,94E-01 |
| <i>PBX3</i>            | 1,04  | 4,28E-01 | 6,94E-01 |
| <i>FMOD</i>            | 1,06  | 4,28E-01 | 6,94E-01 |
| <i>C3orf41</i>         | -1,08 | 4,29E-01 | 6,94E-01 |
| <i>THC2339297</i>      | -1,05 | 4,29E-01 | 6,94E-01 |
| <i>DDAH1</i>           | -1,06 | 4,29E-01 | 6,94E-01 |
| <i>ENST00000381876</i> | -1,11 | 4,29E-01 | 6,94E-01 |
| <i>FHL2</i>            | -1,11 | 4,29E-01 | 6,94E-01 |
| <i>A_24_P126246</i>    | -1,04 | 4,29E-01 | 6,94E-01 |
| <i>KCNT1</i>           | -1,03 | 4,29E-01 | 6,94E-01 |
| <i>NAGA</i>            | -1,03 | 4,29E-01 | 6,94E-01 |
| <i>U82303</i>          | 1,03  | 4,29E-01 | 6,94E-01 |
| <i>C18orf20</i>        | 1,03  | 4,29E-01 | 6,94E-01 |
| <i>RDBP</i>            | 1,03  | 4,29E-01 | 6,94E-01 |
| <i>C9orf71</i>         | 1,03  | 4,29E-01 | 6,94E-01 |
| <i>A_24_P486427</i>    | 1,03  | 4,29E-01 | 6,94E-01 |
| <i>KIAA1660</i>        | 1,03  | 4,29E-01 | 6,94E-01 |
| <i>BM982777</i>        | 1,03  | 4,29E-01 | 6,94E-01 |
| <i>A_23_P41824</i>     | 1,04  | 4,29E-01 | 6,94E-01 |
| <i>A_24_P929926</i>    | 1,03  | 4,29E-01 | 6,94E-01 |
| <i>CARF</i>            | -1,04 | 4,29E-01 | 6,94E-01 |
| <i>AIP</i>             | 1,03  | 4,29E-01 | 6,94E-01 |
| <i>A_24_P761705</i>    | 1,03  | 4,29E-01 | 6,94E-01 |
| <i>K6IRS2</i>          | -1,03 | 4,29E-01 | 6,94E-01 |
| <i>MTUS1</i>           | 1,05  | 4,29E-01 | 6,94E-01 |
| <i>THAP4</i>           | -1,03 | 4,29E-01 | 6,94E-01 |
| <i>LPAL2</i>           | 1,02  | 4,29E-01 | 6,94E-01 |
| <i>RAB10</i>           | -1,03 | 4,29E-01 | 6,94E-01 |
| <i>ADCYAP1</i>         | -1,10 | 4,29E-01 | 6,94E-01 |
| <i>A_24_P477516</i>    | -1,04 | 4,30E-01 | 6,94E-01 |
| <i>C20orf75</i>        | -1,03 | 4,29E-01 | 6,94E-01 |
| <i>MANSC1</i>          | 1,03  | 4,29E-01 | 6,94E-01 |
| <i>AK092418</i>        | 1,05  | 4,29E-01 | 6,94E-01 |
| <i>MFAP5</i>           | 1,12  | 4,29E-01 | 6,94E-01 |
| <i>SAS10</i>           | 1,02  | 4,30E-01 | 6,95E-01 |
| <i>CCT3</i>            | 1,03  | 4,30E-01 | 6,95E-01 |
| <i>A_23_P119407</i>    | -1,05 | 4,30E-01 | 6,95E-01 |
| <i>FLJ34047</i>        | -1,03 | 4,30E-01 | 6,95E-01 |
| <i>DC-Ubp</i>          | 1,03  | 4,30E-01 | 6,95E-01 |
| <i>A_24_P212834</i>    | -1,04 | 4,30E-01 | 6,95E-01 |

|                        |       |          |          |
|------------------------|-------|----------|----------|
| <i>A_24_P418498</i>    | -1,03 | 4,30E-01 | 6,95E-01 |
| <i>ADAM11</i>          | -1,04 | 4,30E-01 | 6,95E-01 |
| <i>UGP2</i>            | 1,03  | 4,30E-01 | 6,95E-01 |
| <i>A_24_P920677</i>    | 1,03  | 4,30E-01 | 6,95E-01 |
| <i>BX409884</i>        | 1,03  | 4,30E-01 | 6,95E-01 |
| <i>KRT8</i>            | -1,03 | 4,30E-01 | 6,95E-01 |
| <i>STK25</i>           | 1,02  | 4,30E-01 | 6,95E-01 |
| <i>ARHGEF12</i>        | 1,03  | 4,30E-01 | 6,95E-01 |
| <i>SPACA1</i>          | 1,04  | 4,30E-01 | 6,95E-01 |
| <i>AA631975</i>        | 1,04  | 4,30E-01 | 6,95E-01 |
| <i>C20orf19</i>        | 1,06  | 4,30E-01 | 6,95E-01 |
| <i>THC2383409</i>      | -1,03 | 4,30E-01 | 6,95E-01 |
| <i>AK027069</i>        | -1,04 | 4,30E-01 | 6,95E-01 |
| <i>AF075112</i>        | -1,04 | 4,30E-01 | 6,95E-01 |
| <i>AA843546</i>        | 1,03  | 4,30E-01 | 6,95E-01 |
| <i>GP2</i>             | 1,03  | 4,30E-01 | 6,95E-01 |
| <i>BQ706262</i>        | -1,11 | 4,31E-01 | 6,95E-01 |
| <i>IRS1</i>            | -1,06 | 4,31E-01 | 6,95E-01 |
| <i>COMTD1</i>          | -1,04 | 4,31E-01 | 6,95E-01 |
| <i>ZMYND17</i>         | -1,04 | 4,31E-01 | 6,95E-01 |
| <i>FBF1</i>            | -1,04 | 4,31E-01 | 6,95E-01 |
| <i>BC019703</i>        | 1,04  | 4,31E-01 | 6,95E-01 |
| <i>AK026195</i>        | 1,04  | 4,31E-01 | 6,95E-01 |
| <i>THC2408570</i>      | 1,04  | 4,31E-01 | 6,95E-01 |
| <i>SERPINA1</i>        | -1,07 | 4,31E-01 | 6,95E-01 |
| <i>BX457728</i>        | -1,05 | 4,31E-01 | 6,95E-01 |
| <i>AF147727</i>        | -1,04 | 4,31E-01 | 6,95E-01 |
| <i>A_32_P148780</i>    | 1,03  | 4,31E-01 | 6,95E-01 |
| <i>FAM49B</i>          | -1,05 | 4,31E-01 | 6,95E-01 |
| <i>IFT80</i>           | -1,02 | 4,31E-01 | 6,95E-01 |
| <i>DLSTP</i>           | 1,03  | 4,31E-01 | 6,95E-01 |
| <i>A_32_P210744</i>    | 1,03  | 4,31E-01 | 6,95E-01 |
| <i>BC034285</i>        | -1,21 | 4,31E-01 | 6,95E-01 |
| <i>A_24_P169645</i>    | -1,05 | 4,31E-01 | 6,95E-01 |
| <i>NUDT2</i>           | -1,04 | 4,31E-01 | 6,95E-01 |
| <i>THC2280188</i>      | -1,04 | 4,31E-01 | 6,95E-01 |
| <i>C3orf35</i>         | 1,02  | 4,31E-01 | 6,95E-01 |
| <i>THC2384148</i>      | 1,03  | 4,31E-01 | 6,95E-01 |
| <i>BF210146</i>        | -1,03 | 4,31E-01 | 6,96E-01 |
| <i>F7</i>              | -1,05 | 4,31E-01 | 6,96E-01 |
| <i>PLL P</i>           | 1,05  | 4,31E-01 | 6,96E-01 |
| <i>ENST00000367058</i> | 1,05  | 4,31E-01 | 6,96E-01 |
| <i>KIR3DL2</i>         | -1,03 | 4,31E-01 | 6,96E-01 |
| <i>THC2369147</i>      | 1,03  | 4,31E-01 | 6,96E-01 |

|                        |       |          |          |
|------------------------|-------|----------|----------|
| <i>ARG1</i>            | -1,04 | 4,31E-01 | 6,96E-01 |
| <i>BQ016822</i>        | 1,03  | 4,32E-01 | 6,96E-01 |
| <i>PPP1R14C</i>        | 1,07  | 4,32E-01 | 6,96E-01 |
| <i>ZNF704</i>          | -1,06 | 4,32E-01 | 6,96E-01 |
| <i>A_32_P96727</i>     | -1,03 | 4,32E-01 | 6,96E-01 |
| <i>PHB</i>             | -1,03 | 4,32E-01 | 6,96E-01 |
| <i>AK074960</i>        | 1,03  | 4,32E-01 | 6,96E-01 |
| <i>VCY</i>             | 1,04  | 4,32E-01 | 6,96E-01 |
| <i>A_24_P910246</i>    | 1,03  | 4,32E-01 | 6,96E-01 |
| <i>SUV420H1</i>        | -1,02 | 4,32E-01 | 6,96E-01 |
| <i>MRPS7</i>           | 1,03  | 4,32E-01 | 6,96E-01 |
| <i>SIDT1</i>           | 1,06  | 4,32E-01 | 6,96E-01 |
| <i>ZNF530</i>          | -1,03 | 4,32E-01 | 6,96E-01 |
| <i>THC2252536</i>      | -1,03 | 4,32E-01 | 6,96E-01 |
| <i>HIPK2</i>           | -1,04 | 4,32E-01 | 6,96E-01 |
| <i>ZMAT4</i>           | -1,05 | 4,32E-01 | 6,96E-01 |
| <i>ZNF417</i>          | -1,04 | 4,32E-01 | 6,96E-01 |
| <i>BC035417</i>        | -1,04 | 4,32E-01 | 6,96E-01 |
| <i>MRPL13</i>          | 1,02  | 4,32E-01 | 6,96E-01 |
| <i>LHFPL5</i>          | 1,02  | 4,32E-01 | 6,96E-01 |
| <i>DDX49</i>           | 1,02  | 4,32E-01 | 6,96E-01 |
| <i>FBXL19</i>          | 1,04  | 4,32E-01 | 6,96E-01 |
| <i>RPL7L1</i>          | -1,02 | 4,32E-01 | 6,96E-01 |
| <i>NEIL3</i>           | 1,02  | 4,32E-01 | 6,96E-01 |
| <i>THC2342908</i>      | 1,04  | 4,32E-01 | 6,96E-01 |
| <i>MGC44505</i>        | 1,02  | 4,33E-01 | 6,96E-01 |
| <i>AF123320</i>        | -1,03 | 4,33E-01 | 6,96E-01 |
| <i>TRIM41</i>          | -1,02 | 4,33E-01 | 6,96E-01 |
| <i>THC2337980</i>      | 1,03  | 4,33E-01 | 6,96E-01 |
| <i>RHD</i>             | 1,04  | 4,33E-01 | 6,96E-01 |
| <i>PPM1K</i>           | 1,07  | 4,33E-01 | 6,96E-01 |
| <i>AF116673</i>        | -1,03 | 4,33E-01 | 6,97E-01 |
| <i>C10orf27</i>        | 1,03  | 4,33E-01 | 6,97E-01 |
| <i>SERPINB5</i>        | 1,14  | 4,33E-01 | 6,97E-01 |
| <i>PALM</i>            | -1,05 | 4,33E-01 | 6,97E-01 |
| <i>AK025116</i>        | 1,03  | 4,33E-01 | 6,97E-01 |
| <i>SOX30</i>           | 1,03  | 4,33E-01 | 6,97E-01 |
| <i>BX381332</i>        | 1,03  | 4,33E-01 | 6,97E-01 |
| <i>ENST00000376752</i> | 1,07  | 4,33E-01 | 6,97E-01 |
| <i>PPARBP</i>          | -1,03 | 4,33E-01 | 6,97E-01 |
| <i>SLC38A3</i>         | -1,03 | 4,33E-01 | 6,97E-01 |
| <i>RBBP5</i>           | 1,02  | 4,33E-01 | 6,97E-01 |
| <i>GOLGB1</i>          | 1,02  | 4,33E-01 | 6,97E-01 |
| <i>C8orf13</i>         | -1,03 | 4,33E-01 | 6,97E-01 |



|                        |       |          |          |
|------------------------|-------|----------|----------|
| <i>C21orf117</i>       | 1,03  | 4,33E-01 | 6,97E-01 |
| <i>THC2316980</i>      | 1,05  | 4,33E-01 | 6,97E-01 |
| <i>A_24_P812155</i>    | -1,03 | 4,33E-01 | 6,97E-01 |
| <i>CD300LG</i>         | -1,06 | 4,34E-01 | 6,97E-01 |
| <i>BX091362</i>        | 1,03  | 4,34E-01 | 6,97E-01 |
| <i>BC055421</i>        | -1,03 | 4,34E-01 | 6,97E-01 |
| <i>A_32_P45087</i>     | -1,03 | 4,34E-01 | 6,98E-01 |
| <i>PARN</i>            | 1,02  | 4,34E-01 | 6,98E-01 |
| <i>THC2345289</i>      | 1,03  | 4,34E-01 | 6,98E-01 |
| <i>PKNOX2</i>          | -1,08 | 4,34E-01 | 6,98E-01 |
| <i>UBA52</i>           | -1,03 | 4,34E-01 | 6,98E-01 |
| <i>UNC5CL</i>          | -1,03 | 4,34E-01 | 6,98E-01 |
| <i>A_32_P104995</i>    | -1,02 | 4,34E-01 | 6,98E-01 |
| <i>ENST00000335142</i> | 1,02  | 4,34E-01 | 6,98E-01 |
| <i>LOC340073</i>       | 1,03  | 4,34E-01 | 6,98E-01 |
| <i>WIBG</i>            | 1,03  | 4,34E-01 | 6,98E-01 |
| <i>TACR2</i>           | -1,12 | 4,34E-01 | 6,98E-01 |
| <i>TMEM125</i>         | -1,06 | 4,34E-01 | 6,98E-01 |
| <i>ENST00000340534</i> | 1,04  | 4,34E-01 | 6,98E-01 |
| <i>NOL8</i>            | -1,03 | 4,34E-01 | 6,98E-01 |
| <i>MATN3</i>           | -1,04 | 4,34E-01 | 6,98E-01 |
| <i>FAM109B</i>         | -1,05 | 4,34E-01 | 6,98E-01 |
| <i>TARSL2</i>          | -1,03 | 4,34E-01 | 6,98E-01 |
| <i>THC2411358</i>      | -1,02 | 4,34E-01 | 6,98E-01 |
| <i>LOC401022</i>       | 1,03  | 4,34E-01 | 6,98E-01 |
| <i>THC2443474</i>      | 1,03  | 4,34E-01 | 6,98E-01 |
| <i>EIF1AY</i>          | 1,05  | 4,34E-01 | 6,98E-01 |
| <i>FGF7</i>            | 1,06  | 4,34E-01 | 6,98E-01 |
| <i>A_32_P160793</i>    | 1,08  | 4,34E-01 | 6,98E-01 |
| <i>A_24_P110239</i>    | -1,03 | 4,34E-01 | 6,98E-01 |
| <i>APOH</i>            | 1,03  | 4,35E-01 | 6,98E-01 |
| <i>C20orf142</i>       | -1,03 | 4,35E-01 | 6,98E-01 |
| <i>MAN2C1</i>          | 1,04  | 4,35E-01 | 6,98E-01 |
| <i>A_32_P10968</i>     | 1,03  | 4,35E-01 | 6,98E-01 |
| <i>THC2381595</i>      | 1,04  | 4,35E-01 | 6,98E-01 |
| <i>THC2397666</i>      | -1,04 | 4,35E-01 | 6,98E-01 |
| <i>THC2340189</i>      | -1,03 | 4,35E-01 | 6,98E-01 |
| <i>AAMP</i>            | -1,03 | 4,35E-01 | 6,98E-01 |
| <i>THC2340924</i>      | -1,02 | 4,35E-01 | 6,98E-01 |
| <i>ATXN7L4</i>         | 1,03  | 4,35E-01 | 6,98E-01 |
| <i>TACR3</i>           | 1,03  | 4,35E-01 | 6,98E-01 |
| <i>PARP1</i>           | 1,04  | 4,35E-01 | 6,98E-01 |
| <i>CR625615</i>        | 1,04  | 4,35E-01 | 6,98E-01 |
| <i>A_24_P565503</i>    | 1,04  | 4,35E-01 | 6,98E-01 |

|                        |       |          |          |
|------------------------|-------|----------|----------|
| <i>RASSF6</i>          | -1,04 | 4,35E-01 | 6,98E-01 |
| <i>A_24_P931554</i>    | -1,03 | 4,35E-01 | 6,98E-01 |
| <i>BM503308</i>        | 1,03  | 4,35E-01 | 6,98E-01 |
| <i>A_24_P837537</i>    | 1,05  | 4,35E-01 | 6,98E-01 |
| <i>SGOL1</i>           | 1,02  | 4,35E-01 | 6,99E-01 |
| <i>THC2288214</i>      | -1,07 | 4,36E-01 | 6,99E-01 |
| <i>ENST00000323556</i> | -1,05 | 4,36E-01 | 6,99E-01 |
| <i>TMEM22</i>          | -1,04 | 4,36E-01 | 6,99E-01 |
| <i>AF086179</i>        | -1,04 | 4,36E-01 | 6,99E-01 |
| <i>A_24_P418590</i>    | -1,03 | 4,36E-01 | 6,99E-01 |
| <i>GLB1</i>            | -1,02 | 4,36E-01 | 6,99E-01 |
| <i>ENST00000297912</i> | -1,02 | 4,36E-01 | 6,99E-01 |
| <i>GTF2A1</i>          | 1,03  | 4,36E-01 | 6,99E-01 |
| <i>SERPINI2</i>        | 1,03  | 4,36E-01 | 6,99E-01 |
| <i>IMPA2</i>           | 1,09  | 4,36E-01 | 6,99E-01 |
| <i>ENST00000368598</i> | 1,03  | 4,36E-01 | 6,99E-01 |
| <i>A_32_P233769</i>    | -1,04 | 4,36E-01 | 6,99E-01 |
| <i>FLJ36032</i>        | -1,11 | 4,36E-01 | 6,99E-01 |
| <i>FLJ34521</i>        | 1,03  | 4,36E-01 | 6,99E-01 |
| <i>FRZB</i>            | 1,14  | 4,36E-01 | 6,99E-01 |
| <i>AK126431</i>        | -1,13 | 4,36E-01 | 6,99E-01 |
| <i>A_24_P33115</i>     | -1,04 | 4,36E-01 | 6,99E-01 |
| <i>A_24_P794892</i>    | -1,04 | 4,36E-01 | 6,99E-01 |
| <i>LRRC47</i>          | -1,03 | 4,36E-01 | 6,99E-01 |
| <i>THC2288194</i>      | -1,03 | 4,36E-01 | 6,99E-01 |
| <i>C1orf64</i>         | -1,02 | 4,36E-01 | 6,99E-01 |
| <i>IL12RB1</i>         | -1,02 | 4,36E-01 | 6,99E-01 |
| <i>OSRF</i>            | 1,03  | 4,36E-01 | 6,99E-01 |
| <i>PET112L</i>         | 1,03  | 4,36E-01 | 6,99E-01 |
| <i>EBNA1BP2</i>        | 1,03  | 4,36E-01 | 6,99E-01 |
| <i>THC2457293</i>      | 1,03  | 4,36E-01 | 6,99E-01 |
| <i>FAM19A4</i>         | 1,04  | 4,36E-01 | 6,99E-01 |
| <i>THC2262518</i>      | 1,04  | 4,36E-01 | 6,99E-01 |
| <i>BC044863</i>        | 1,06  | 4,36E-01 | 6,99E-01 |
| <i>VEGFC</i>           | 1,08  | 4,36E-01 | 6,99E-01 |
| <i>THC2358447</i>      | -1,04 | 4,37E-01 | 6,99E-01 |
| <i>RFPL1</i>           | -1,03 | 4,37E-01 | 6,99E-01 |
| <i>THC2284082</i>      | 1,03  | 4,36E-01 | 6,99E-01 |
| <i>BE049564</i>        | 1,03  | 4,37E-01 | 6,99E-01 |
| <i>ENST00000310006</i> | 1,03  | 4,37E-01 | 6,99E-01 |
| <i>NFKBIL1</i>         | 1,04  | 4,37E-01 | 6,99E-01 |
| <i>HPD</i>             | 1,06  | 4,37E-01 | 6,99E-01 |
| <i>BX104825</i>        | 1,03  | 4,37E-01 | 6,99E-01 |
| <i>AW235815</i>        | -1,03 | 4,37E-01 | 6,99E-01 |

|                 |       |          |          |
|-----------------|-------|----------|----------|
| DGCR14          | -1,03 | 4,37E-01 | 6,99E-01 |
| A_24_P383834    | -1,03 | 4,37E-01 | 6,99E-01 |
| AK094659        | -1,03 | 4,37E-01 | 6,99E-01 |
| BM547933        | -1,02 | 4,37E-01 | 6,99E-01 |
| AF274944        | 1,03  | 4,37E-01 | 7,00E-01 |
| THC2377413      | -1,03 | 4,37E-01 | 7,00E-01 |
| BQ377696        | -1,03 | 4,37E-01 | 7,00E-01 |
| PCDHB13         | 1,03  | 4,37E-01 | 7,00E-01 |
| ENST00000378260 | 1,03  | 4,37E-01 | 7,00E-01 |
| RUTBC3          | -1,02 | 4,37E-01 | 7,00E-01 |
| DEFB119         | 1,02  | 4,37E-01 | 7,00E-01 |
| DCDC1           | 1,03  | 4,37E-01 | 7,00E-01 |
| LOC441212       | 1,04  | 4,37E-01 | 7,00E-01 |
| PDE9A           | 1,07  | 4,37E-01 | 7,00E-01 |
| AW804491        | -1,04 | 4,37E-01 | 7,00E-01 |
| A_24_P911442    | -1,03 | 4,37E-01 | 7,00E-01 |
| A_32_P100719    | 1,03  | 4,37E-01 | 7,00E-01 |
| THC2304438      | 1,03  | 4,37E-01 | 7,00E-01 |
| RPE             | 1,03  | 4,37E-01 | 7,00E-01 |
| NKX2-3          | 1,04  | 4,37E-01 | 7,00E-01 |
| ASS             | 1,04  | 4,37E-01 | 7,00E-01 |
| PLEKHG3         | -1,09 | 4,37E-01 | 7,00E-01 |
| ENST00000377918 | -1,05 | 4,37E-01 | 7,00E-01 |
| CTSF            | -1,08 | 4,38E-01 | 7,00E-01 |
| ZBTB20          | -1,03 | 4,38E-01 | 7,00E-01 |
| A_23_P88554     | 1,03  | 4,38E-01 | 7,00E-01 |
| SESN3           | 1,03  | 4,38E-01 | 7,00E-01 |
| TROAP           | 1,03  | 4,38E-01 | 7,00E-01 |
| FLJ10154        | 1,06  | 4,38E-01 | 7,00E-01 |
| TBC1D4          | -1,05 | 4,38E-01 | 7,00E-01 |
| SET             | 1,07  | 4,38E-01 | 7,00E-01 |
| ENST00000336283 | 1,03  | 4,38E-01 | 7,00E-01 |
| LOC642698       | 1,03  | 4,38E-01 | 7,00E-01 |
| TRIP12          | 1,02  | 4,38E-01 | 7,00E-01 |
| USP29           | 1,02  | 4,38E-01 | 7,00E-01 |
| SST             | 1,04  | 4,38E-01 | 7,00E-01 |
| ICMT            | 1,05  | 4,38E-01 | 7,00E-01 |
| ANKRD45         | 1,05  | 4,38E-01 | 7,00E-01 |
| GCLC            | -1,04 | 4,38E-01 | 7,00E-01 |
| BC036361        | -1,03 | 4,38E-01 | 7,00E-01 |
| AGTRAP          | 1,03  | 4,38E-01 | 7,00E-01 |
| CA313037        | -1,06 | 4,38E-01 | 7,00E-01 |
| MGC33926        | -1,06 | 4,38E-01 | 7,00E-01 |
| STAG3           | -1,03 | 4,38E-01 | 7,00E-01 |

|                        |       |          |          |
|------------------------|-------|----------|----------|
| <i>TCL6</i>            | 1,02  | 4,38E-01 | 7,00E-01 |
| <i>BM091498</i>        | 1,03  | 4,38E-01 | 7,00E-01 |
| <i>U2AF1L4</i>         | 1,03  | 4,38E-01 | 7,00E-01 |
| <i>FLJ10213</i>        | -1,04 | 4,38E-01 | 7,00E-01 |
| <i>AK131325</i>        | -1,03 | 4,38E-01 | 7,00E-01 |
| <i>DOCK10</i>          | -1,12 | 4,38E-01 | 7,00E-01 |
| <i>WDR64</i>           | -1,04 | 4,39E-01 | 7,00E-01 |
| <i>DNM2</i>            | 1,03  | 4,39E-01 | 7,00E-01 |
| <i>THC2375353</i>      | -1,10 | 4,39E-01 | 7,00E-01 |
| <i>KLRA1</i>           | -1,04 | 4,39E-01 | 7,00E-01 |
| <i>TBC1D5</i>          | -1,03 | 4,39E-01 | 7,00E-01 |
| <i>A_24_P289973</i>    | 1,03  | 4,39E-01 | 7,00E-01 |
| <i>BC007968</i>        | 1,03  | 4,39E-01 | 7,00E-01 |
| <i>RPP14</i>           | -1,03 | 4,39E-01 | 7,01E-01 |
| <i>FES</i>             | 1,04  | 4,39E-01 | 7,01E-01 |
| <i>AF074987</i>        | -1,04 | 4,39E-01 | 7,01E-01 |
| <i>AL357193</i>        | -1,03 | 4,39E-01 | 7,01E-01 |
| <i>CALN1</i>           | 1,15  | 4,39E-01 | 7,01E-01 |
| <i>DALRD3</i>          | -1,03 | 4,39E-01 | 7,01E-01 |
| <i>GALT</i>            | -1,04 | 4,39E-01 | 7,01E-01 |
| <i>ENST00000309260</i> | -1,03 | 4,39E-01 | 7,01E-01 |
| <i>AL359654</i>        | 1,03  | 4,39E-01 | 7,01E-01 |
| <i>LOC284998</i>       | 1,03  | 4,39E-01 | 7,01E-01 |
| <i>AA495894</i>        | 1,05  | 4,39E-01 | 7,01E-01 |
| <i>ENTPD6</i>          | -1,03 | 4,40E-01 | 7,01E-01 |
| <i>A_24_P84698</i>     | 1,03  | 4,40E-01 | 7,01E-01 |
| <i>FLJ43934</i>        | 1,03  | 4,39E-01 | 7,01E-01 |
| <i>SYT8</i>            | 1,03  | 4,40E-01 | 7,01E-01 |
| <i>C6orf146</i>        | -1,03 | 4,40E-01 | 7,01E-01 |
| <i>KTI12</i>           | -1,03 | 4,40E-01 | 7,01E-01 |
| <i>A_24_P93397</i>     | -1,04 | 4,40E-01 | 7,01E-01 |
| <i>THC2336812</i>      | -1,03 | 4,40E-01 | 7,02E-01 |
| <i>A_32_P142160</i>    | 1,08  | 4,40E-01 | 7,02E-01 |
| <i>A_32_P83795</i>     | 1,03  | 4,40E-01 | 7,02E-01 |
| <i>BC031827</i>        | 1,03  | 4,40E-01 | 7,02E-01 |
| <i>GRIN2D</i>          | 1,06  | 4,40E-01 | 7,02E-01 |
| <i>HLXB9</i>           | 1,02  | 4,40E-01 | 7,02E-01 |
| <i>THC2382063</i>      | -1,03 | 4,40E-01 | 7,02E-01 |
| <i>IFNA8</i>           | 1,03  | 4,40E-01 | 7,02E-01 |
| <i>COG5</i>            | -1,04 | 4,40E-01 | 7,02E-01 |
| <i>BRDT</i>            | 1,03  | 4,40E-01 | 7,02E-01 |
| <i>ENST00000312710</i> | 1,05  | 4,40E-01 | 7,02E-01 |
| <i>PAX2</i>            | 1,02  | 4,41E-01 | 7,02E-01 |
| <i>BNIPL</i>           | -1,07 | 4,41E-01 | 7,02E-01 |

|                     |       |          |          |
|---------------------|-------|----------|----------|
| <i>CEP55</i>        | -1,05 | 4,41E-01 | 7,02E-01 |
| <i>AF257098</i>     | -1,08 | 4,41E-01 | 7,02E-01 |
| <i>AK124390</i>     | 1,08  | 4,41E-01 | 7,02E-01 |
| <i>ZDHHC6</i>       | -1,02 | 4,41E-01 | 7,02E-01 |
| <i>AA042935</i>     | 1,02  | 4,41E-01 | 7,02E-01 |
| <i>HIST1H2BN</i>    | -1,04 | 4,41E-01 | 7,02E-01 |
| <i>AW872828</i>     | -1,03 | 4,41E-01 | 7,02E-01 |
| <i>SPACA3</i>       | 1,02  | 4,41E-01 | 7,03E-01 |
| <i>TSSK3</i>        | -1,03 | 4,41E-01 | 7,03E-01 |
| <i>AK001062</i>     | -1,04 | 4,41E-01 | 7,03E-01 |
| <i>AK098597</i>     | -1,03 | 4,41E-01 | 7,03E-01 |
| <i>A_24_P460887</i> | 1,03  | 4,41E-01 | 7,03E-01 |
| <i>THC2404842</i>   | -1,03 | 4,41E-01 | 7,03E-01 |
| <i>LOC541467</i>    | -1,03 | 4,41E-01 | 7,03E-01 |
| <i>SNX11</i>        | -1,03 | 4,41E-01 | 7,03E-01 |
| <i>TAF2</i>         | -1,03 | 4,41E-01 | 7,03E-01 |
| <i>THC2297841</i>   | 1,03  | 4,41E-01 | 7,03E-01 |
| <i>VPS13A</i>       | 1,04  | 4,41E-01 | 7,03E-01 |
| <i>A_32_P5514</i>   | -1,03 | 4,41E-01 | 7,03E-01 |
| <i>THC2440027</i>   | 1,03  | 4,42E-01 | 7,03E-01 |
| <i>A_24_P941012</i> | 1,03  | 4,42E-01 | 7,03E-01 |
| <i>ALDH1L1</i>      | -1,04 | 4,42E-01 | 7,03E-01 |
| <i>POFUT1</i>       | -1,03 | 4,42E-01 | 7,03E-01 |
| <i>A_24_P173895</i> | -1,03 | 4,42E-01 | 7,03E-01 |
| <i>A_24_P203984</i> | -1,03 | 4,42E-01 | 7,03E-01 |
| <i>HIST1H1B</i>     | -1,05 | 4,42E-01 | 7,04E-01 |
| <i>IRX1</i>         | -1,03 | 4,42E-01 | 7,04E-01 |
| <i>ABCC6</i>        | 1,07  | 4,42E-01 | 7,04E-01 |
| <i>A_24_P585198</i> | -1,03 | 4,42E-01 | 7,04E-01 |
| <i>STYK1</i>        | -1,06 | 4,42E-01 | 7,04E-01 |
| <i>YLPM1</i>        | 1,02  | 4,42E-01 | 7,04E-01 |
| <i>CNGB1</i>        | 1,02  | 4,42E-01 | 7,04E-01 |
| <i>SMG6</i>         | -1,03 | 4,42E-01 | 7,04E-01 |
| <i>THC2314861</i>   | 1,04  | 4,43E-01 | 7,04E-01 |
| <i>KLHL21</i>       | -1,06 | 4,43E-01 | 7,04E-01 |
| <i>NSUN7</i>        | -1,06 | 4,43E-01 | 7,05E-01 |
| <i>L1TD1</i>        | -1,12 | 4,43E-01 | 7,05E-01 |
| <i>ZNF690</i>       | -1,06 | 4,43E-01 | 7,05E-01 |
| <i>A_24_P861685</i> | -1,04 | 4,43E-01 | 7,05E-01 |
| <i>A_24_P581311</i> | -1,03 | 4,43E-01 | 7,05E-01 |
| <i>COMMD4</i>       | 1,02  | 4,43E-01 | 7,05E-01 |
| <i>LOC51255</i>     | 1,02  | 4,43E-01 | 7,05E-01 |
| <i>OR8J1</i>        | 1,02  | 4,43E-01 | 7,05E-01 |
| <i>A_24_P229756</i> | 1,02  | 4,43E-01 | 7,05E-01 |

|                     |       |          |          |
|---------------------|-------|----------|----------|
| <i>UNQ5830</i>      | 1,03  | 4,43E-01 | 7,05E-01 |
| <i>THC2381333</i>   | 1,03  | 4,43E-01 | 7,05E-01 |
| <i>BM680083</i>     | 1,03  | 4,43E-01 | 7,05E-01 |
| <i>A_24_P767725</i> | 1,04  | 4,43E-01 | 7,05E-01 |
| <i>A_24_P916515</i> | 1,05  | 4,43E-01 | 7,05E-01 |
| <i>ZDHHC11</i>      | 1,09  | 4,43E-01 | 7,05E-01 |
| <i>TULP3</i>        | -1,04 | 4,43E-01 | 7,05E-01 |
| <i>TNPO2</i>        | -1,03 | 4,43E-01 | 7,05E-01 |
| <i>MOV10</i>        | -1,02 | 4,43E-01 | 7,05E-01 |
| <i>RASSF1</i>       | 1,03  | 4,43E-01 | 7,05E-01 |
| <i>BC092424</i>     | 1,05  | 4,43E-01 | 7,05E-01 |
| <i>NOM1</i>         | 1,03  | 4,43E-01 | 7,05E-01 |
| <i>PLA2G1B</i>      | 1,03  | 4,44E-01 | 7,05E-01 |
| <i>C2orf25</i>      | 1,03  | 4,44E-01 | 7,05E-01 |
| <i>NP238262</i>     | 1,03  | 4,44E-01 | 7,05E-01 |
| <i>A_32_P146597</i> | 1,04  | 4,44E-01 | 7,05E-01 |
| <i>KIAA0133</i>     | -1,04 | 4,44E-01 | 7,05E-01 |
| <i>BC031979</i>     | -1,02 | 4,44E-01 | 7,05E-01 |
| <i>A_24_P912279</i> | 1,02  | 4,44E-01 | 7,05E-01 |
| <i>A_32_P232437</i> | -1,03 | 4,44E-01 | 7,05E-01 |
| <i>C20orf173</i>    | 1,02  | 4,44E-01 | 7,05E-01 |
| <i>BCL9</i>         | 1,04  | 4,44E-01 | 7,05E-01 |
| <i>A_24_P944490</i> | 1,03  | 4,44E-01 | 7,05E-01 |
| <i>IDH3A</i>        | -1,04 | 4,44E-01 | 7,06E-01 |
| <i>MGC35440</i>     | 1,03  | 4,44E-01 | 7,06E-01 |
| <i>ANKFN1</i>       | -1,12 | 4,44E-01 | 7,06E-01 |
| <i>A_32_P152696</i> | -1,05 | 4,44E-01 | 7,06E-01 |
| <i>PKMYT1</i>       | -1,03 | 4,44E-01 | 7,06E-01 |
| <i>ZSCAN4</i>       | 1,03  | 4,44E-01 | 7,06E-01 |
| <i>PDCL3</i>        | 1,03  | 4,44E-01 | 7,06E-01 |
| <i>RPS6KA2</i>      | 1,05  | 4,44E-01 | 7,06E-01 |
| <i>CSNK1G2</i>      | 1,02  | 4,45E-01 | 7,06E-01 |
| <i>APPL</i>         | -1,04 | 4,45E-01 | 7,06E-01 |
| <i>AK091511</i>     | 1,03  | 4,45E-01 | 7,06E-01 |
| <i>OPA1</i>         | 1,03  | 4,45E-01 | 7,06E-01 |
| <i>S100B</i>        | 1,09  | 4,45E-01 | 7,06E-01 |
| <i>IMP5</i>         | -1,05 | 4,45E-01 | 7,06E-01 |
| <i>ZNF192</i>       | -1,04 | 4,45E-01 | 7,06E-01 |
| <i>A_24_P281285</i> | 1,03  | 4,45E-01 | 7,06E-01 |
| <i>C16orf48</i>     | 1,03  | 4,45E-01 | 7,06E-01 |
| <i>A_24_P673209</i> | 1,03  | 4,45E-01 | 7,06E-01 |
| <i>CR625561</i>     | 1,07  | 4,45E-01 | 7,06E-01 |
| <i>GYPB</i>         | -1,03 | 4,45E-01 | 7,06E-01 |
| <i>ARHGEF1</i>      | -1,02 | 4,45E-01 | 7,07E-01 |

|                     |       |          |          |
|---------------------|-------|----------|----------|
| <i>EPN3</i>         | -1,05 | 4,45E-01 | 7,07E-01 |
| <i>ABCB9</i>        | -1,02 | 4,45E-01 | 7,07E-01 |
| <i>VRK1</i>         | 1,03  | 4,45E-01 | 7,07E-01 |
| <i>A_24_P126902</i> | -1,06 | 4,45E-01 | 7,07E-01 |
| <i>C2orf185</i>     | 1,04  | 4,46E-01 | 7,07E-01 |
| <i>GMPR</i>         | 1,06  | 4,46E-01 | 7,07E-01 |
| <i>MAMDC2</i>       | 1,08  | 4,46E-01 | 7,07E-01 |
| <i>RGR</i>          | -1,03 | 4,46E-01 | 7,07E-01 |
| <i>ERP29</i>        | -1,03 | 4,46E-01 | 7,07E-01 |
| <i>C16orf65</i>     | 1,03  | 4,46E-01 | 7,07E-01 |
| <i>D00022</i>       | 1,03  | 4,46E-01 | 7,07E-01 |
| <i>A_24_P676566</i> | -1,04 | 4,46E-01 | 7,07E-01 |
| <i>BRCA1</i>        | -1,03 | 4,46E-01 | 7,07E-01 |
| <i>LOC202459</i>    | -1,06 | 4,46E-01 | 7,07E-01 |
| <i>THC2440839</i>   | -1,04 | 4,46E-01 | 7,07E-01 |
| <i>LOC286170</i>    | 1,03  | 4,46E-01 | 7,07E-01 |
| <i>FSD1</i>         | -1,05 | 4,46E-01 | 7,08E-01 |
| <i>SLC6A9</i>       | -1,04 | 4,46E-01 | 7,08E-01 |
| <i>AS3MT</i>        | -1,05 | 4,47E-01 | 7,08E-01 |
| <i>MGC16824</i>     | 1,03  | 4,47E-01 | 7,08E-01 |
| <i>MGC23909</i>     | 1,05  | 4,47E-01 | 7,08E-01 |
| <i>CR616528</i>     | -1,06 | 4,47E-01 | 7,08E-01 |
| <i>KIF20A</i>       | -1,03 | 4,47E-01 | 7,08E-01 |
| <i>HLCS</i>         | -1,03 | 4,47E-01 | 7,08E-01 |
| <i>OAS2</i>         | 1,06  | 4,47E-01 | 7,08E-01 |
| <i>A_24_P321184</i> | 1,04  | 4,47E-01 | 7,08E-01 |
| <i>OR10A4</i>       | 1,03  | 4,47E-01 | 7,08E-01 |
| <i>KISS1R</i>       | 1,06  | 4,47E-01 | 7,08E-01 |
| <i>CHRM2</i>        | 1,03  | 4,47E-01 | 7,08E-01 |
| <i>A_24_P917228</i> | -1,04 | 4,47E-01 | 7,08E-01 |
| <i>A_24_P332292</i> | -1,03 | 4,47E-01 | 7,08E-01 |
| <i>KIAA0280</i>     | -1,03 | 4,47E-01 | 7,08E-01 |
| <i>AK096102</i>     | 1,03  | 4,47E-01 | 7,08E-01 |
| <i>FLNA</i>         | 1,11  | 4,47E-01 | 7,09E-01 |
| <i>THC2378575</i>   | 1,03  | 4,47E-01 | 7,09E-01 |
| <i>LOC57400</i>     | -1,03 | 4,47E-01 | 7,09E-01 |
| <i>AK055529</i>     | 1,04  | 4,47E-01 | 7,09E-01 |
| <i>BC037918</i>     | -1,03 | 4,48E-01 | 7,09E-01 |
| <i>UBTF</i>         | -1,03 | 4,48E-01 | 7,09E-01 |
| <i>ARTS-1</i>       | -1,04 | 4,48E-01 | 7,09E-01 |
| <i>YSK4</i>         | -1,03 | 4,48E-01 | 7,09E-01 |
| <i>THC2333719</i>   | 1,02  | 4,48E-01 | 7,09E-01 |
| <i>THC2385894</i>   | 1,03  | 4,48E-01 | 7,09E-01 |
| <i>THC2288993</i>   | 1,03  | 4,48E-01 | 7,09E-01 |

|                        |       |          |          |
|------------------------|-------|----------|----------|
| <i>THC2378079</i>      | 1,04  | 4,48E-01 | 7,09E-01 |
| <i>U72516</i>          | 1,05  | 4,48E-01 | 7,09E-01 |
| <i>ENST00000382170</i> | -1,04 | 4,48E-01 | 7,09E-01 |
| <i>A_32_P124655</i>    | -1,03 | 4,48E-01 | 7,09E-01 |
| <i>THC2443434</i>      | -1,03 | 4,48E-01 | 7,09E-01 |
| <i>SLIT3</i>           | -1,05 | 4,48E-01 | 7,09E-01 |
| <i>NY-REN-7</i>        | -1,06 | 4,48E-01 | 7,09E-01 |
| <i>ENST00000366862</i> | -1,03 | 4,48E-01 | 7,09E-01 |
| <i>ENST00000310074</i> | -1,03 | 4,48E-01 | 7,09E-01 |
| <i>ATRNL1</i>          | 1,05  | 4,48E-01 | 7,09E-01 |
| <i>ACLY</i>            | -1,04 | 4,48E-01 | 7,09E-01 |
| <i>ENST00000271847</i> | 1,03  | 4,48E-01 | 7,09E-01 |
| <i>A_32_P30187</i>     | 1,06  | 4,48E-01 | 7,09E-01 |
| <i>SRP68</i>           | 1,02  | 4,48E-01 | 7,09E-01 |
| <i>BM926140</i>        | -1,05 | 4,49E-01 | 7,10E-01 |
| <i>TAT</i>             | -1,04 | 4,49E-01 | 7,10E-01 |
| <i>ENST00000341569</i> | 1,03  | 4,49E-01 | 7,10E-01 |
| <i>HCFC1R1</i>         | 1,04  | 4,49E-01 | 7,10E-01 |
| <i>THC2410568</i>      | 1,03  | 4,49E-01 | 7,10E-01 |
| <i>LOC400642</i>       | -1,05 | 4,49E-01 | 7,10E-01 |
| <i>AF132201</i>        | -1,03 | 4,49E-01 | 7,10E-01 |
| <i>OR3A1</i>           | -1,03 | 4,49E-01 | 7,10E-01 |
| <i>WDR25</i>           | -1,02 | 4,49E-01 | 7,10E-01 |
| <i>C20orf45</i>        | 1,03  | 4,49E-01 | 7,10E-01 |
| <i>RGSL2</i>           | 1,03  | 4,49E-01 | 7,10E-01 |
| <i>AW178774</i>        | 1,04  | 4,49E-01 | 7,10E-01 |
| <i>CRELD1</i>          | 1,07  | 4,49E-01 | 7,10E-01 |
| <i>A_24_P84408</i>     | -1,03 | 4,49E-01 | 7,10E-01 |
| <i>NAPB</i>            | -1,04 | 4,49E-01 | 7,10E-01 |
| <i>PPYR1</i>           | -1,03 | 4,49E-01 | 7,10E-01 |
| <i>CTNNB1</i>          | 1,03  | 4,49E-01 | 7,10E-01 |
| <i>RP11-327P2.4</i>    | 1,04  | 4,49E-01 | 7,10E-01 |
| <i>TGFBR3</i>          | -1,05 | 4,49E-01 | 7,10E-01 |
| <i>S100A7</i>          | 1,47  | 4,49E-01 | 7,10E-01 |
| <i>LRRC40</i>          | -1,03 | 4,49E-01 | 7,10E-01 |
| <i>C3orf28</i>         | 1,03  | 4,49E-01 | 7,10E-01 |
| <i>AF336795</i>        | -1,04 | 4,49E-01 | 7,10E-01 |
| <i>THC2283545</i>      | -1,03 | 4,49E-01 | 7,10E-01 |
| <i>LRRC51</i>          | 1,02  | 4,49E-01 | 7,10E-01 |
| <i>CDC20</i>           | 1,02  | 4,49E-01 | 7,10E-01 |
| <i>AA608624</i>        | 1,03  | 4,49E-01 | 7,10E-01 |
| <i>COMMD7</i>          | 1,03  | 4,49E-01 | 7,10E-01 |
| <i>A_24_P101742</i>    | 1,03  | 4,49E-01 | 7,10E-01 |
| <i>SUV39H1</i>         | -1,03 | 4,50E-01 | 7,10E-01 |



|                        |       |          |          |
|------------------------|-------|----------|----------|
| <i>NOLA3</i>           | 1,03  | 4,50E-01 | 7,10E-01 |
| <i>GNL2</i>            | 1,04  | 4,50E-01 | 7,10E-01 |
| <i>A_24_P945345</i>    | -1,03 | 4,50E-01 | 7,10E-01 |
| <i>ENST00000309004</i> | -1,03 | 4,50E-01 | 7,10E-01 |
| <i>HIST1H3F</i>        | -1,05 | 4,50E-01 | 7,10E-01 |
| <i>ANAPC1</i>          | -1,03 | 4,50E-01 | 7,11E-01 |
| <i>ENST00000289135</i> | -1,04 | 4,50E-01 | 7,11E-01 |
| <i>THC2361738</i>      | -1,03 | 4,50E-01 | 7,11E-01 |
| <i>THC2301132</i>      | 1,03  | 4,50E-01 | 7,11E-01 |
| <i>LRRC37B</i>         | -1,02 | 4,50E-01 | 7,11E-01 |
| <i>AF159093</i>        | -1,03 | 4,50E-01 | 7,11E-01 |
| <i>INPPL1</i>          | -1,04 | 4,50E-01 | 7,11E-01 |
| <i>BCO05092</i>        | -1,03 | 4,50E-01 | 7,11E-01 |
| <i>LOC402377</i>       | -1,03 | 4,50E-01 | 7,11E-01 |
| <i>C14orf100</i>       | -1,03 | 4,50E-01 | 7,11E-01 |
| <i>IL2</i>             | 1,02  | 4,50E-01 | 7,11E-01 |
| <i>AI818976</i>        | 1,02  | 4,50E-01 | 7,11E-01 |
| <i>BF184174</i>        | 1,02  | 4,50E-01 | 7,11E-01 |
| <i>AI277022</i>        | 1,03  | 4,50E-01 | 7,11E-01 |
| <i>CHRNA7</i>          | 1,06  | 4,50E-01 | 7,11E-01 |
| <i>A_32_P68479</i>     | -1,03 | 4,50E-01 | 7,11E-01 |
| <i>ARHGAP23</i>        | -1,03 | 4,50E-01 | 7,11E-01 |
| <i>A_24_P541213</i>    | -1,03 | 4,50E-01 | 7,11E-01 |
| <i>A_32_P119018</i>    | -1,02 | 4,50E-01 | 7,11E-01 |
| <i>AK023542</i>        | 1,05  | 4,50E-01 | 7,11E-01 |
| <i>A_24_P929957</i>    | -1,03 | 4,51E-01 | 7,11E-01 |
| <i>COL9A1</i>          | 1,04  | 4,51E-01 | 7,11E-01 |
| <i>CAPZB</i>           | 1,03  | 4,51E-01 | 7,11E-01 |
| <i>RNASE4</i>          | -1,06 | 4,51E-01 | 7,11E-01 |
| <i>TSNAXIP1</i>        | -1,03 | 4,51E-01 | 7,11E-01 |
| <i>A_32_P9737</i>      | -1,07 | 4,51E-01 | 7,11E-01 |
| <i>SCFD2</i>           | -1,05 | 4,51E-01 | 7,11E-01 |
| <i>ABCB8</i>           | -1,04 | 4,51E-01 | 7,11E-01 |
| <i>A_24_P941723</i>    | -1,03 | 4,51E-01 | 7,11E-01 |
| <i>PRKCSH</i>          | -1,03 | 4,51E-01 | 7,11E-01 |
| <i>KIF15</i>           | -1,05 | 4,51E-01 | 7,11E-01 |
| <i>THC2316929</i>      | -1,03 | 4,51E-01 | 7,11E-01 |
| <i>AK023515</i>        | -1,03 | 4,51E-01 | 7,11E-01 |
| <i>MKNK1</i>           | -1,04 | 4,51E-01 | 7,11E-01 |
| <i>MLLT7</i>           | 1,05  | 4,51E-01 | 7,11E-01 |
| <i>AF086054</i>        | -1,03 | 4,51E-01 | 7,11E-01 |
| <i>KIAA2010</i>        | -1,02 | 4,51E-01 | 7,11E-01 |
| <i>RFC3</i>            | -1,02 | 4,51E-01 | 7,11E-01 |
| <i>BM310182</i>        | 1,03  | 4,51E-01 | 7,11E-01 |

|                 |       |          |          |
|-----------------|-------|----------|----------|
| ZNF608          | -1,05 | 4,51E-01 | 7,11E-01 |
| A_32_P190334    | 1,05  | 4,51E-01 | 7,11E-01 |
| YTHDF2          | -1,02 | 4,51E-01 | 7,12E-01 |
| NAP1L5          | 1,04  | 4,52E-01 | 7,12E-01 |
| WNT3A           | 1,06  | 4,52E-01 | 7,12E-01 |
| ENST00000305046 | -1,10 | 4,52E-01 | 7,12E-01 |
| LHX5            | -1,03 | 4,52E-01 | 7,12E-01 |
| GPBP1           | -1,02 | 4,52E-01 | 7,12E-01 |
| C4orf28         | -1,02 | 4,52E-01 | 7,12E-01 |
| SEMG1           | 1,03  | 4,52E-01 | 7,12E-01 |
| C15orf27        | -1,06 | 4,52E-01 | 7,12E-01 |
| ENST00000367545 | 1,05  | 4,52E-01 | 7,12E-01 |
| LOC196394       | -1,04 | 4,52E-01 | 7,12E-01 |
| TBC1D17         | 1,04  | 4,52E-01 | 7,12E-01 |
| A_24_P392900    | -1,07 | 4,52E-01 | 7,12E-01 |
| THC2349220      | -1,03 | 4,52E-01 | 7,12E-01 |
| BE893137        | 1,09  | 4,52E-01 | 7,12E-01 |
| SH2B1           | -1,02 | 4,52E-01 | 7,12E-01 |
| BC041979        | 1,04  | 4,52E-01 | 7,12E-01 |
| LOC338328       | 1,09  | 4,52E-01 | 7,12E-01 |
| AF007193        | 1,03  | 4,52E-01 | 7,12E-01 |
| AL133564        | 1,03  | 4,52E-01 | 7,12E-01 |
| MAP3K12         | 1,03  | 4,53E-01 | 7,13E-01 |
| D15Wsu75e       | 1,04  | 4,53E-01 | 7,13E-01 |
| A_24_P930237    | 1,04  | 4,53E-01 | 7,13E-01 |
| BX537432        | 1,03  | 4,53E-01 | 7,13E-01 |
| DB153264        | 1,03  | 4,53E-01 | 7,13E-01 |
| BX112970        | 1,03  | 4,53E-01 | 7,13E-01 |
| DNAJC6          | 1,03  | 4,53E-01 | 7,13E-01 |
| ZNF436          | -1,05 | 4,53E-01 | 7,13E-01 |
| H2AFB2          | 1,03  | 4,53E-01 | 7,13E-01 |
| CCDC113         | 1,03  | 4,53E-01 | 7,13E-01 |
| OR2S2           | 1,06  | 4,53E-01 | 7,13E-01 |
| BQ008507        | 1,03  | 4,53E-01 | 7,13E-01 |
| DB534761        | 1,12  | 4,53E-01 | 7,14E-01 |
| LOC389888       | 1,03  | 4,54E-01 | 7,14E-01 |
| MDH1B           | -1,04 | 4,54E-01 | 7,14E-01 |
| SLC44A2         | 1,03  | 4,54E-01 | 7,14E-01 |
| FLJ40125        | 1,03  | 4,54E-01 | 7,14E-01 |
| CCNDBP1         | 1,04  | 4,54E-01 | 7,14E-01 |
| CDK2AP1         | -1,05 | 4,54E-01 | 7,14E-01 |
| AA865794        | -1,03 | 4,54E-01 | 7,14E-01 |
| AL137284        | 1,02  | 4,54E-01 | 7,14E-01 |
| MMP16           | 1,03  | 4,54E-01 | 7,14E-01 |

|                        |       |          |          |
|------------------------|-------|----------|----------|
| <i>KENAE</i>           | 1,03  | 4,54E-01 | 7,14E-01 |
| <i>ENST00000262971</i> | -1,07 | 4,54E-01 | 7,14E-01 |
| <i>BX421789</i>        | 1,03  | 4,54E-01 | 7,14E-01 |
| <i>ASB17</i>           | 1,03  | 4,54E-01 | 7,14E-01 |
| <i>A_32_P6274</i>      | 1,03  | 4,54E-01 | 7,14E-01 |
| <i>HNRPA2B1</i>        | -1,04 | 4,54E-01 | 7,14E-01 |
| <i>FAM46C</i>          | -1,09 | 4,54E-01 | 7,14E-01 |
| <i>ORC4L</i>           | -1,03 | 4,54E-01 | 7,14E-01 |
| <i>A_24_P84220</i>     | -1,05 | 4,54E-01 | 7,14E-01 |
| <i>ENST00000360099</i> | -1,03 | 4,54E-01 | 7,14E-01 |
| <i>AK057720</i>        | -1,03 | 4,54E-01 | 7,14E-01 |
| <i>ENST00000366822</i> | -1,05 | 4,55E-01 | 7,14E-01 |
| <i>E2F3</i>            | -1,04 | 4,54E-01 | 7,14E-01 |
| <i>MBD3</i>            | 1,03  | 4,54E-01 | 7,14E-01 |
| <i>SBF1</i>            | 1,03  | 4,54E-01 | 7,14E-01 |
| <i>BM670548</i>        | 1,04  | 4,55E-01 | 7,14E-01 |
| <i>LOC144501</i>       | -1,09 | 4,55E-01 | 7,14E-01 |
| <i>AK023571</i>        | -1,03 | 4,55E-01 | 7,14E-01 |
| <i>KIAA1706</i>        | -1,05 | 4,55E-01 | 7,14E-01 |
| <i>SEC23A</i>          | -1,04 | 4,55E-01 | 7,14E-01 |
| <i>A_24_P910842</i>    | -1,04 | 4,55E-01 | 7,14E-01 |
| <i>BC029456</i>        | -1,03 | 4,55E-01 | 7,14E-01 |
| <i>THC2408544</i>      | 1,04  | 4,55E-01 | 7,14E-01 |
| <i>DCX</i>             | 1,07  | 4,55E-01 | 7,14E-01 |
| <i>A_32_P207151</i>    | 1,04  | 4,55E-01 | 7,14E-01 |
| <i>SEC13L1</i>         | -1,05 | 4,55E-01 | 7,15E-01 |
| <i>PSG3</i>            | 1,03  | 4,55E-01 | 7,15E-01 |
| <i>CLCN7</i>           | 1,03  | 4,55E-01 | 7,15E-01 |
| <i>RUNX3</i>           | 1,08  | 4,55E-01 | 7,15E-01 |
| <i>THC2342762</i>      | 1,06  | 4,55E-01 | 7,15E-01 |
| <i>A_24_P524164</i>    | 1,03  | 4,55E-01 | 7,15E-01 |
| <i>THC2449273</i>      | -1,03 | 4,55E-01 | 7,15E-01 |
| <i>A_24_P923331</i>    | -1,02 | 4,55E-01 | 7,15E-01 |
| <i>PSMD14</i>          | 1,04  | 4,55E-01 | 7,15E-01 |
| <i>C21orf69</i>        | 1,02  | 4,56E-01 | 7,15E-01 |
| <i>LOC285708</i>       | 1,02  | 4,56E-01 | 7,15E-01 |
| <i>AK023690</i>        | 1,03  | 4,56E-01 | 7,15E-01 |
| <i>AK027610</i>        | -1,04 | 4,56E-01 | 7,15E-01 |
| <i>A_24_P101146</i>    | -1,04 | 4,56E-01 | 7,15E-01 |
| <i>AF116688</i>        | -1,05 | 4,56E-01 | 7,15E-01 |
| <i>LOC644029</i>       | -1,03 | 4,56E-01 | 7,15E-01 |
| <i>MAGEB6</i>          | -1,02 | 4,56E-01 | 7,15E-01 |
| <i>SERPINA7</i>        | 1,03  | 4,56E-01 | 7,15E-01 |
| <i>ENST00000381577</i> | 1,07  | 4,56E-01 | 7,15E-01 |

|                        |       |          |          |
|------------------------|-------|----------|----------|
| <i>ISG15</i>           | 1,07  | 4,56E-01 | 7,15E-01 |
| <i>HGD</i>             | 1,03  | 4,56E-01 | 7,16E-01 |
| <i>PDCD10</i>          | 1,03  | 4,56E-01 | 7,16E-01 |
| <i>FBP1</i>            | -1,04 | 4,56E-01 | 7,16E-01 |
| <i>CUBN</i>            | -1,03 | 4,56E-01 | 7,16E-01 |
| <i>HINT1</i>           | 1,02  | 4,56E-01 | 7,16E-01 |
| <i>KIAA1466</i>        | 1,03  | 4,56E-01 | 7,16E-01 |
| <i>LRRK1</i>           | -1,03 | 4,56E-01 | 7,16E-01 |
| <i>ENST00000255667</i> | -1,03 | 4,56E-01 | 7,16E-01 |
| <i>A_32_P233569</i>    | -1,03 | 4,56E-01 | 7,16E-01 |
| <i>DENND2C</i>         | -1,03 | 4,56E-01 | 7,16E-01 |
| <i>THC2406680</i>      | -1,03 | 4,56E-01 | 7,16E-01 |
| <i>KIF1B</i>           | 1,04  | 4,56E-01 | 7,16E-01 |
| <i>A_23_P211603</i>    | -1,05 | 4,56E-01 | 7,16E-01 |
| <i>POLM</i>            | 1,06  | 4,56E-01 | 7,16E-01 |
| <i>GPHA2</i>           | -1,02 | 4,56E-01 | 7,16E-01 |
| <i>MYOHD1</i>          | -1,04 | 4,57E-01 | 7,16E-01 |
| <i>GTPBP1</i>          | 1,02  | 4,57E-01 | 7,16E-01 |
| <i>SELL</i>            | -1,04 | 4,57E-01 | 7,16E-01 |
| <i>A_24_P927996</i>    | 1,03  | 4,57E-01 | 7,16E-01 |
| <i>A_24_P478940</i>    | 1,07  | 4,57E-01 | 7,16E-01 |
| <i>THC2311599</i>      | 1,05  | 4,57E-01 | 7,16E-01 |
| <i>FZD5</i>            | -1,16 | 4,57E-01 | 7,17E-01 |
| <i>THC2415954</i>      | -1,04 | 4,57E-01 | 7,17E-01 |
| <i>A_24_P160920</i>    | -1,04 | 4,57E-01 | 7,17E-01 |
| <i>ACADSB</i>          | -1,03 | 4,57E-01 | 7,17E-01 |
| <i>A_24_P606835</i>    | -1,03 | 4,57E-01 | 7,17E-01 |
| <i>PHF8</i>            | -1,02 | 4,57E-01 | 7,17E-01 |
| <i>FLJ14768</i>        | 1,03  | 4,57E-01 | 7,17E-01 |
| <i>AK092271</i>        | 1,05  | 4,57E-01 | 7,17E-01 |
| <i>HIST2H2BE</i>       | -1,03 | 4,57E-01 | 7,17E-01 |
| <i>DP58</i>            | 1,03  | 4,57E-01 | 7,17E-01 |
| <i>NP1214952</i>       | 1,02  | 4,57E-01 | 7,17E-01 |
| <i>GLYAT</i>           | 1,03  | 4,57E-01 | 7,17E-01 |
| <i>RTKN</i>            | 1,03  | 4,57E-01 | 7,17E-01 |
| <i>RSU1</i>            | 1,03  | 4,57E-01 | 7,17E-01 |
| <i>A_24_P930815</i>    | 1,03  | 4,58E-01 | 7,17E-01 |
| <i>CGA</i>             | 1,02  | 4,58E-01 | 7,17E-01 |
| <i>AF086077</i>        | -1,10 | 4,58E-01 | 7,17E-01 |
| <i>THC2304500</i>      | 1,03  | 4,58E-01 | 7,17E-01 |
| <i>AY037144</i>        | 1,03  | 4,58E-01 | 7,17E-01 |
| <i>ENST00000358897</i> | -1,03 | 4,58E-01 | 7,17E-01 |
| <i>A_24_P366465</i>    | 1,05  | 4,58E-01 | 7,17E-01 |
| <i>CR617018</i>        | -1,04 | 4,58E-01 | 7,17E-01 |

|                        |       |          |          |
|------------------------|-------|----------|----------|
| <i>HNRPK</i>           | -1,02 | 4,58E-01 | 7,17E-01 |
| <i>A_32_P209489</i>    | 1,03  | 4,58E-01 | 7,17E-01 |
| <i>A_24_P229911</i>    | 1,03  | 4,58E-01 | 7,17E-01 |
| <i>AA550817</i>        | -1,03 | 4,58E-01 | 7,17E-01 |
| <i>ASRGL1</i>          | -1,04 | 4,58E-01 | 7,17E-01 |
| <i>BM547196</i>        | 1,05  | 4,58E-01 | 7,17E-01 |
| <i>SATB2</i>           | -1,05 | 4,58E-01 | 7,17E-01 |
| <i>A_24_P752853</i>    | 1,03  | 4,58E-01 | 7,17E-01 |
| <i>C9orf58</i>         | 1,08  | 4,58E-01 | 7,17E-01 |
| <i>TMPRSS5</i>         | 1,08  | 4,58E-01 | 7,17E-01 |
| <i>CDKL5</i>           | -1,04 | 4,58E-01 | 7,17E-01 |
| <i>IL1F7</i>           | -1,03 | 4,59E-01 | 7,18E-01 |
| <i>TMEM140</i>         | -1,03 | 4,59E-01 | 7,18E-01 |
| <i>BX346853</i>        | 1,02  | 4,59E-01 | 7,18E-01 |
| <i>AJ711693</i>        | 1,03  | 4,59E-01 | 7,18E-01 |
| <i>THC2426166</i>      | 1,03  | 4,59E-01 | 7,18E-01 |
| <i>ENST00000337025</i> | -1,03 | 4,59E-01 | 7,18E-01 |
| <i>ADARB1</i>          | -1,07 | 4,59E-01 | 7,18E-01 |
| <i>SPATA20</i>         | -1,04 | 4,59E-01 | 7,18E-01 |
| <i>SRP54</i>           | -1,03 | 4,59E-01 | 7,18E-01 |
| <i>AK127569</i>        | -1,03 | 4,59E-01 | 7,18E-01 |
| <i>ENST00000376068</i> | -1,03 | 4,59E-01 | 7,18E-01 |
| <i>ENST00000377028</i> | -1,02 | 4,59E-01 | 7,18E-01 |
| <i>CR615261</i>        | 1,03  | 4,59E-01 | 7,18E-01 |
| <i>TRAP1</i>           | 1,03  | 4,59E-01 | 7,18E-01 |
| <i>ENST00000237763</i> | -1,03 | 4,59E-01 | 7,18E-01 |
| <i>OR8K3</i>           | 1,03  | 4,59E-01 | 7,18E-01 |
| <i>ZYG11BL</i>         | 1,03  | 4,59E-01 | 7,18E-01 |
| <i>BC038355</i>        | 1,04  | 4,59E-01 | 7,18E-01 |
| <i>ANP32C</i>          | 1,05  | 4,59E-01 | 7,18E-01 |
| <i>DEFA3</i>           | 1,15  | 4,59E-01 | 7,18E-01 |
| <i>A_24_P918694</i>    | 1,03  | 4,59E-01 | 7,18E-01 |
| <i>TSGA14</i>          | -1,04 | 4,59E-01 | 7,18E-01 |
| <i>THC2316352</i>      | -1,03 | 4,59E-01 | 7,18E-01 |
| <i>KIAA0082</i>        | -1,02 | 4,59E-01 | 7,18E-01 |
| <i>ENST00000379864</i> | 1,05  | 4,59E-01 | 7,18E-01 |
| <i>ENST00000270201</i> | -1,04 | 4,59E-01 | 7,18E-01 |
| <i>CD174733</i>        | -1,03 | 4,59E-01 | 7,18E-01 |
| <i>FOXM1</i>           | -1,03 | 4,59E-01 | 7,18E-01 |
| <i>CXCL9</i>           | -1,22 | 4,60E-01 | 7,18E-01 |
| <i>HIF1AN</i>          | -1,03 | 4,60E-01 | 7,18E-01 |
| <i>THC2362085</i>      | -1,06 | 4,60E-01 | 7,18E-01 |
| <i>CD74</i>            | -1,05 | 4,60E-01 | 7,18E-01 |
| <i>ZNF134</i>          | -1,03 | 4,60E-01 | 7,18E-01 |

|                        |       |          |          |
|------------------------|-------|----------|----------|
| <i>A_24_P114463</i>    | -1,03 | 4,60E-01 | 7,18E-01 |
| <i>EPN1</i>            | 1,03  | 4,60E-01 | 7,18E-01 |
| <i>POLR3D</i>          | -1,04 | 4,60E-01 | 7,18E-01 |
| <i>TNPO1</i>           | -1,03 | 4,60E-01 | 7,18E-01 |
| <i>ENST00000326320</i> | -1,02 | 4,60E-01 | 7,18E-01 |
| <i>ERCC3</i>           | -1,02 | 4,60E-01 | 7,18E-01 |
| <i>THC2443466</i>      | 1,03  | 4,60E-01 | 7,18E-01 |
| <i>ZFYVE1</i>          | -1,02 | 4,60E-01 | 7,18E-01 |
| <i>GPR39</i>           | -1,03 | 4,60E-01 | 7,18E-01 |
| <i>LOC642711</i>       | -1,03 | 4,60E-01 | 7,18E-01 |
| <i>NLE1</i>            | -1,03 | 4,60E-01 | 7,19E-01 |
| <i>CD7</i>             | 1,02  | 4,60E-01 | 7,19E-01 |
| <i>SLC18A3</i>         | -1,03 | 4,60E-01 | 7,19E-01 |
| <i>PLEKHM1</i>         | -1,03 | 4,60E-01 | 7,19E-01 |
| <i>LOC158435</i>       | -1,03 | 4,60E-01 | 7,19E-01 |
| <i>LOC647219</i>       | 1,03  | 4,60E-01 | 7,19E-01 |
| <i>AI094165</i>        | -1,08 | 4,61E-01 | 7,19E-01 |
| <i>ZBED4</i>           | -1,04 | 4,61E-01 | 7,19E-01 |
| <i>THC2416528</i>      | 1,02  | 4,61E-01 | 7,19E-01 |
| <i>LPPR2</i>           | 1,03  | 4,61E-01 | 7,19E-01 |
| <i>HIRA</i>            | 1,03  | 4,61E-01 | 7,19E-01 |
| <i>THC2274885</i>      | 1,03  | 4,61E-01 | 7,19E-01 |
| <i>SLC26A2</i>         | 1,03  | 4,61E-01 | 7,19E-01 |
| <i>A_24_P417757</i>    | 1,04  | 4,61E-01 | 7,19E-01 |
| <i>CHD7</i>            | 1,04  | 4,61E-01 | 7,19E-01 |
| <i>CYP39A1</i>         | 1,05  | 4,61E-01 | 7,19E-01 |
| <i>PDGFRB</i>          | 1,05  | 4,61E-01 | 7,19E-01 |
| <i>AL109704</i>        | 1,11  | 4,61E-01 | 7,19E-01 |
| <i>ENST00000244221</i> | -1,06 | 4,61E-01 | 7,19E-01 |
| <i>ENST00000324050</i> | 1,06  | 4,61E-01 | 7,19E-01 |
| <i>ENST00000255741</i> | 1,04  | 4,61E-01 | 7,19E-01 |
| <i>NFIX</i>            | -1,04 | 4,61E-01 | 7,19E-01 |
| <i>LAMP3</i>           | -1,10 | 4,61E-01 | 7,19E-01 |
| <i>MAPK13</i>          | -1,06 | 4,61E-01 | 7,19E-01 |
| <i>THC2273766</i>      | 1,03  | 4,61E-01 | 7,19E-01 |
| <i>C12orf39</i>        | -1,03 | 4,61E-01 | 7,19E-01 |
| <i>FUSIP1</i>          | -1,03 | 4,61E-01 | 7,19E-01 |
| <i>LYZL6</i>           | -1,03 | 4,61E-01 | 7,19E-01 |
| <i>THC2381194</i>      | -1,02 | 4,61E-01 | 7,19E-01 |
| <i>OTOR</i>            | 1,03  | 4,61E-01 | 7,19E-01 |
| <i>A_24_P187459</i>    | 1,03  | 4,61E-01 | 7,19E-01 |
| <i>PCDH9</i>           | 1,08  | 4,61E-01 | 7,19E-01 |
| <i>TIMM13</i>          | -1,03 | 4,61E-01 | 7,19E-01 |
| <i>AX775899</i>        | 1,03  | 4,61E-01 | 7,19E-01 |

|                        |       |          |          |
|------------------------|-------|----------|----------|
| <i>ENST00000372072</i> | -1,02 | 4,62E-01 | 7,20E-01 |
| <i>FRRS1</i>           | 1,04  | 4,62E-01 | 7,20E-01 |
| <i>ENST00000253728</i> | 1,07  | 4,62E-01 | 7,20E-01 |
| <i>AX721299</i>        | 1,03  | 4,62E-01 | 7,20E-01 |
| <i>THC2375981</i>      | -1,04 | 4,62E-01 | 7,20E-01 |
| <i>TAF7L</i>           | 1,04  | 4,62E-01 | 7,20E-01 |
| <i>AK001101</i>        | -1,03 | 4,62E-01 | 7,20E-01 |
| <i>BC041440</i>        | -1,03 | 4,62E-01 | 7,20E-01 |
| <i>TCHP</i>            | -1,03 | 4,62E-01 | 7,20E-01 |
| <i>AK125540</i>        | 1,07  | 4,62E-01 | 7,20E-01 |
| <i>LILRA5</i>          | 1,02  | 4,62E-01 | 7,20E-01 |
| <i>MUC16</i>           | 1,03  | 4,62E-01 | 7,20E-01 |
| <i>ERCC8</i>           | -1,03 | 4,62E-01 | 7,20E-01 |
| <i>THC2404308</i>      | -1,09 | 4,62E-01 | 7,20E-01 |
| <i>TAF1</i>            | 1,03  | 4,62E-01 | 7,20E-01 |
| <i>A_24_P418780</i>    | -1,06 | 4,63E-01 | 7,20E-01 |
| <i>HOXD9</i>           | -1,06 | 4,62E-01 | 7,20E-01 |
| <i>ENST00000376333</i> | -1,05 | 4,63E-01 | 7,20E-01 |
| <i>A_24_P903628</i>    | -1,03 | 4,63E-01 | 7,20E-01 |
| <i>A_24_P933249</i>    | 1,02  | 4,63E-01 | 7,20E-01 |
| <i>A_24_P525029</i>    | 1,03  | 4,63E-01 | 7,20E-01 |
| <i>C10orf49</i>        | 1,03  | 4,63E-01 | 7,20E-01 |
| <i>THC2343919</i>      | 1,03  | 4,63E-01 | 7,20E-01 |
| <i>AL565007</i>        | 1,03  | 4,63E-01 | 7,20E-01 |
| <i>FLJ35934</i>        | 1,05  | 4,63E-01 | 7,20E-01 |
| <i>ENST00000301038</i> | 1,06  | 4,63E-01 | 7,20E-01 |
| <i>TSNARE1</i>         | 1,03  | 4,63E-01 | 7,21E-01 |
| <i>MGC9712</i>         | -1,05 | 4,63E-01 | 7,21E-01 |
| <i>BX116720</i>        | -1,04 | 4,63E-01 | 7,21E-01 |
| <i>PDPR</i>            | -1,03 | 4,63E-01 | 7,21E-01 |
| <i>FAM116B</i>         | -1,03 | 4,63E-01 | 7,21E-01 |
| <i>KIAA1166</i>        | 1,03  | 4,63E-01 | 7,21E-01 |
| <i>THC2380963</i>      | 1,04  | 4,63E-01 | 7,21E-01 |
| <i>IMMT</i>            | 1,03  | 4,63E-01 | 7,21E-01 |
| <i>THC2282944</i>      | -1,04 | 4,63E-01 | 7,21E-01 |
| <i>RERE</i>            | -1,04 | 4,63E-01 | 7,21E-01 |
| <i>HSDL2</i>           | -1,03 | 4,63E-01 | 7,21E-01 |
| <i>THC2274391</i>      | 1,03  | 4,63E-01 | 7,21E-01 |
| <i>FOXK2</i>           | 1,03  | 4,63E-01 | 7,21E-01 |
| <i>ENST00000284293</i> | -1,03 | 4,64E-01 | 7,21E-01 |
| <i>ENST00000370708</i> | 1,03  | 4,64E-01 | 7,21E-01 |
| <i>AW275823</i>        | 1,03  | 4,64E-01 | 7,21E-01 |
| <i>ENST00000308862</i> | -1,04 | 4,64E-01 | 7,21E-01 |
| <i>HIST3H2A</i>        | 1,05  | 4,64E-01 | 7,21E-01 |

|                        |       |          |          |
|------------------------|-------|----------|----------|
| <i>LOC387601</i>       | -1,04 | 4,64E-01 | 7,21E-01 |
| <i>ENST00000222390</i> | 1,05  | 4,64E-01 | 7,21E-01 |
| <i>PCSK6</i>           | 1,03  | 4,64E-01 | 7,22E-01 |
| <i>A_24_P41483</i>     | 1,03  | 4,64E-01 | 7,22E-01 |
| <i>LOC643594</i>       | -1,11 | 4,64E-01 | 7,22E-01 |
| <i>ENST00000309900</i> | -1,03 | 4,64E-01 | 7,22E-01 |
| <i>ISOC2</i>           | 1,05  | 4,64E-01 | 7,22E-01 |
| <i>THC2378103</i>      | 1,03  | 4,64E-01 | 7,22E-01 |
| <i>ENST00000377125</i> | 1,04  | 4,64E-01 | 7,22E-01 |
| <i>THC2412999</i>      | 1,03  | 4,64E-01 | 7,22E-01 |
| <i>AK131396</i>        | -1,09 | 4,64E-01 | 7,22E-01 |
| <i>RAB35</i>           | 1,02  | 4,64E-01 | 7,22E-01 |
| <i>SEMA6A</i>          | 1,06  | 4,64E-01 | 7,22E-01 |
| <i>A_24_P101480</i>    | 1,03  | 4,64E-01 | 7,22E-01 |
| <i>A_24_P919488</i>    | 1,04  | 4,64E-01 | 7,22E-01 |
| <i>GPR37L1</i>         | -1,03 | 4,65E-01 | 7,22E-01 |
| <i>A_23_P204225</i>    | 1,03  | 4,65E-01 | 7,22E-01 |
| <i>AK023629</i>        | -1,04 | 4,65E-01 | 7,22E-01 |
| <i>CHCHD8</i>          | -1,02 | 4,65E-01 | 7,22E-01 |
| <i>A_24_P350008</i>    | -1,03 | 4,65E-01 | 7,22E-01 |
| <i>GJB1</i>            | -1,02 | 4,65E-01 | 7,23E-01 |
| <i>A_24_P717824</i>    | 1,03  | 4,65E-01 | 7,23E-01 |
| <i>FUT5</i>            | -1,07 | 4,65E-01 | 7,23E-01 |
| <i>ENST00000324303</i> | 1,03  | 4,65E-01 | 7,23E-01 |
| <i>GNL3</i>            | -1,04 | 4,65E-01 | 7,23E-01 |
| <i>BC006419</i>        | 1,03  | 4,65E-01 | 7,23E-01 |
| <i>STK11IP</i>         | 1,03  | 4,65E-01 | 7,23E-01 |
| <i>NUT</i>             | 1,03  | 4,65E-01 | 7,23E-01 |
| <i>CLPS</i>            | 1,03  | 4,65E-01 | 7,23E-01 |
| <i>C20orf39</i>        | 1,14  | 4,65E-01 | 7,23E-01 |
| <i>THC2364223</i>      | 1,02  | 4,65E-01 | 7,23E-01 |
| <i>DKFZP761H1710</i>   | 1,02  | 4,65E-01 | 7,23E-01 |
| <i>AF275804</i>        | 1,04  | 4,66E-01 | 7,23E-01 |
| <i>FLJ11996</i>        | -1,04 | 4,66E-01 | 7,23E-01 |
| <i>C16orf68</i>        | -1,03 | 4,66E-01 | 7,23E-01 |
| <i>PRPF4</i>           | 1,02  | 4,66E-01 | 7,23E-01 |
| <i>UIP1</i>            | 1,03  | 4,66E-01 | 7,23E-01 |
| <i>FOXO3A</i>          | 1,04  | 4,66E-01 | 7,23E-01 |
| <i>ANKRD50</i>         | 1,04  | 4,66E-01 | 7,23E-01 |
| <i>MGP</i>             | -1,09 | 4,66E-01 | 7,23E-01 |
| <i>PPA2</i>            | -1,04 | 4,66E-01 | 7,23E-01 |
| <i>C6orf111</i>        | -1,03 | 4,66E-01 | 7,23E-01 |
| <i>A_24_P931568</i>    | -1,03 | 4,66E-01 | 7,23E-01 |
| <i>AY358510</i>        | 1,02  | 4,66E-01 | 7,23E-01 |



|                        |       |          |          |
|------------------------|-------|----------|----------|
| <i>A_24_P341426</i>    | 1,04  | 4,66E-01 | 7,23E-01 |
| <i>BF370042</i>        | 1,04  | 4,66E-01 | 7,23E-01 |
| <i>THC2250454</i>      | 1,09  | 4,66E-01 | 7,23E-01 |
| <i>MPHOSPH6</i>        | 1,03  | 4,66E-01 | 7,23E-01 |
| <i>A_32_P36767</i>     | -1,03 | 4,66E-01 | 7,23E-01 |
| <i>GOLGA2</i>          | -1,03 | 4,66E-01 | 7,23E-01 |
| <i>ENST00000301719</i> | 1,03  | 4,66E-01 | 7,23E-01 |
| <i>A_24_P264416</i>    | 1,08  | 4,66E-01 | 7,23E-01 |
| <i>SFTPA2</i>          | -1,03 | 4,66E-01 | 7,23E-01 |
| <i>TSPYL5</i>          | -1,04 | 4,66E-01 | 7,23E-01 |
| <i>NR3C2</i>           | -1,04 | 4,66E-01 | 7,23E-01 |
| <i>MGC50722</i>        | -1,03 | 4,66E-01 | 7,23E-01 |
| <i>LGALS9</i>          | -1,05 | 4,66E-01 | 7,24E-01 |
| <i>KIR2DL4</i>         | 1,02  | 4,67E-01 | 7,24E-01 |
| <i>ENST00000292728</i> | 1,03  | 4,67E-01 | 7,24E-01 |
| <i>PF4V1</i>           | -1,04 | 4,67E-01 | 7,24E-01 |
| <i>TTC16</i>           | -1,03 | 4,67E-01 | 7,24E-01 |
| <i>ENST00000321464</i> | 1,05  | 4,67E-01 | 7,24E-01 |
| <i>CD163L1</i>         | -1,08 | 4,67E-01 | 7,24E-01 |
| <i>AL109783</i>        | -1,03 | 4,67E-01 | 7,24E-01 |
| <i>AY358798</i>        | -1,03 | 4,67E-01 | 7,24E-01 |
| <i>LOC493869</i>       | -1,06 | 4,67E-01 | 7,24E-01 |
| <i>FAM5B</i>           | -1,03 | 4,67E-01 | 7,24E-01 |
| <i>RIG</i>             | 1,02  | 4,67E-01 | 7,24E-01 |
| <i>LOC152719</i>       | -1,04 | 4,67E-01 | 7,24E-01 |
| <i>PRKCI</i>           | 1,04  | 4,67E-01 | 7,24E-01 |
| <i>CST9L</i>           | -1,04 | 4,67E-01 | 7,24E-01 |
| <i>THC2277511</i>      | 1,02  | 4,67E-01 | 7,24E-01 |
| <i>ENST00000310055</i> | -1,03 | 4,67E-01 | 7,24E-01 |
| <i>39873</i>           | -1,02 | 4,67E-01 | 7,24E-01 |
| <i>ENST00000370203</i> | 1,03  | 4,67E-01 | 7,24E-01 |
| <i>AI114607</i>        | 1,03  | 4,67E-01 | 7,24E-01 |
| <i>THC2277556</i>      | 1,04  | 4,67E-01 | 7,24E-01 |
| <i>TUBB1</i>           | 1,04  | 4,67E-01 | 7,24E-01 |
| <i>CR621698</i>        | -1,06 | 4,68E-01 | 7,24E-01 |
| <i>PAGE2</i>           | -1,03 | 4,68E-01 | 7,24E-01 |
| <i>ENST00000320216</i> | -1,02 | 4,68E-01 | 7,24E-01 |
| <i>A_24_P938243</i>    | -1,02 | 4,68E-01 | 7,24E-01 |
| <i>ZNF428</i>          | 1,02  | 4,68E-01 | 7,24E-01 |
| <i>AA230176</i>        | 1,03  | 4,68E-01 | 7,24E-01 |
| <i>A_24_P255314</i>    | 1,06  | 4,68E-01 | 7,24E-01 |
| <i>FLJ11292</i>        | -1,08 | 4,68E-01 | 7,24E-01 |
| <i>A_23_P72434</i>     | -1,03 | 4,68E-01 | 7,24E-01 |
| <i>A_32_P139842</i>    | -1,03 | 4,68E-01 | 7,24E-01 |

|                        |       |          |          |
|------------------------|-------|----------|----------|
| <i>ENST00000317633</i> | 1,05  | 4,68E-01 | 7,24E-01 |
| <i>LRRC7</i>           | 1,07  | 4,68E-01 | 7,24E-01 |
| <i>ACOX1</i>           | -1,03 | 4,68E-01 | 7,24E-01 |
| <i>CDC42BPB</i>        | 1,03  | 4,68E-01 | 7,24E-01 |
| <i>A_32_P183519</i>    | 1,08  | 4,68E-01 | 7,25E-01 |
| <i>TRAF3</i>           | -1,04 | 4,68E-01 | 7,25E-01 |
| <i>COG4</i>            | 1,02  | 4,68E-01 | 7,25E-01 |
| <i>BG912760</i>        | 1,04  | 4,68E-01 | 7,25E-01 |
| <i>FGF8</i>            | 1,03  | 4,68E-01 | 7,25E-01 |
| <i>THC2302027</i>      | -1,03 | 4,68E-01 | 7,25E-01 |
| <i>ANKRD5</i>          | 1,02  | 4,68E-01 | 7,25E-01 |
| <i>A_24_P912404</i>    | -1,04 | 4,68E-01 | 7,25E-01 |
| <i>SULT1B1</i>         | -1,02 | 4,68E-01 | 7,25E-01 |
| <i>HMCN1</i>           | 1,09  | 4,69E-01 | 7,25E-01 |
| <i>HIST2H2AC</i>       | 1,04  | 4,69E-01 | 7,25E-01 |
| <i>A_24_P221778</i>    | -1,02 | 4,69E-01 | 7,25E-01 |
| <i>SIAH1</i>           | 1,03  | 4,69E-01 | 7,25E-01 |
| <i>LOC388610</i>       | -1,05 | 4,69E-01 | 7,25E-01 |
| <i>BRDG1</i>           | -1,03 | 4,69E-01 | 7,25E-01 |
| <i>SPESP1</i>          | 1,04  | 4,69E-01 | 7,25E-01 |
| <i>KIAA1875</i>        | -1,04 | 4,69E-01 | 7,25E-01 |
| <i>ENST00000375377</i> | -1,05 | 4,69E-01 | 7,25E-01 |
| <i>AF318327</i>        | -1,03 | 4,69E-01 | 7,25E-01 |
| <i>THC2397713</i>      | 1,03  | 4,69E-01 | 7,25E-01 |
| <i>KLHL25</i>          | 1,06  | 4,69E-01 | 7,25E-01 |
| <i>WIZ</i>             | -1,03 | 4,69E-01 | 7,25E-01 |
| <i>A_24_P118719</i>    | 1,04  | 4,69E-01 | 7,26E-01 |
| <i>PDZD11</i>          | -1,03 | 4,69E-01 | 7,26E-01 |
| <i>THAP9</i>           | -1,03 | 4,69E-01 | 7,26E-01 |
| <i>NALP12</i>          | 1,03  | 4,69E-01 | 7,26E-01 |
| <i>AL137495</i>        | -1,03 | 4,69E-01 | 7,26E-01 |
| <i>A_24_P934622</i>    | 1,03  | 4,69E-01 | 7,26E-01 |
| <i>AA876351</i>        | 1,04  | 4,70E-01 | 7,26E-01 |
| <i>H68939</i>          | 1,03  | 4,70E-01 | 7,26E-01 |
| <i>AF339787</i>        | 1,03  | 4,70E-01 | 7,26E-01 |
| <i>BF478043</i>        | 1,03  | 4,70E-01 | 7,26E-01 |
| <i>A_24_P943630</i>    | 1,03  | 4,70E-01 | 7,26E-01 |
| <i>AQP7P2</i>          | 1,05  | 4,70E-01 | 7,26E-01 |
| <i>PRDX5</i>           | -1,03 | 4,70E-01 | 7,26E-01 |
| <i>IFNB1</i>           | 1,03  | 4,70E-01 | 7,26E-01 |
| <i>CLUL1</i>           | -1,04 | 4,70E-01 | 7,26E-01 |
| <i>CACNB1</i>          | -1,03 | 4,70E-01 | 7,26E-01 |
| <i>MGC35154</i>        | -1,03 | 4,70E-01 | 7,26E-01 |
| <i>PRAME</i>           | 1,02  | 4,70E-01 | 7,26E-01 |

|                        |       |          |          |
|------------------------|-------|----------|----------|
| <i>THC2405168</i>      | 1,03  | 4,70E-01 | 7,26E-01 |
| <i>C10orf125</i>       | 1,04  | 4,70E-01 | 7,26E-01 |
| <i>AF086529</i>        | 1,04  | 4,70E-01 | 7,26E-01 |
| <i>A_24_P374973</i>    | 1,05  | 4,70E-01 | 7,26E-01 |
| <i>L26953</i>          | -1,03 | 4,70E-01 | 7,26E-01 |
| <i>LRRC2</i>           | 1,32  | 4,70E-01 | 7,26E-01 |
| <i>ABCD1</i>           | -1,06 | 4,70E-01 | 7,26E-01 |
| <i>AA019203</i>        | -1,03 | 4,70E-01 | 7,26E-01 |
| <i>METTL4</i>          | -1,03 | 4,70E-01 | 7,26E-01 |
| <i>T62549</i>          | 1,02  | 4,70E-01 | 7,26E-01 |
| <i>USP33</i>           | 1,03  | 4,70E-01 | 7,26E-01 |
| <i>A_24_P96857</i>     | -1,06 | 4,70E-01 | 7,26E-01 |
| <i>TCEAL3</i>          | -1,04 | 4,70E-01 | 7,26E-01 |
| <i>EFHD1</i>           | 1,07  | 4,70E-01 | 7,26E-01 |
| <i>TRIM46</i>          | 1,02  | 4,71E-01 | 7,27E-01 |
| <i>A_32_P149461</i>    | -1,05 | 4,71E-01 | 7,27E-01 |
| <i>SYF2</i>            | 1,04  | 4,71E-01 | 7,27E-01 |
| <i>ENST00000201023</i> | -1,03 | 4,71E-01 | 7,27E-01 |
| <i>ACSM2</i>           | -1,04 | 4,71E-01 | 7,27E-01 |
| <i>C6orf47</i>         | -1,03 | 4,71E-01 | 7,27E-01 |
| <i>PRKCE</i>           | 1,03  | 4,71E-01 | 7,27E-01 |
| <i>MKI67</i>           | 1,03  | 4,71E-01 | 7,27E-01 |
| <i>KIAA0515</i>        | 1,03  | 4,71E-01 | 7,27E-01 |
| <i>FLJ38379</i>        | -1,03 | 4,71E-01 | 7,27E-01 |
| <i>A_24_P695691</i>    | -1,02 | 4,71E-01 | 7,27E-01 |
| <i>TH1L</i>            | -1,02 | 4,71E-01 | 7,27E-01 |
| <i>ENST00000293502</i> | -1,08 | 4,71E-01 | 7,27E-01 |
| <i>FLJ25416</i>        | -1,03 | 4,71E-01 | 7,27E-01 |
| <i>LRRC49</i>          | -1,03 | 4,71E-01 | 7,27E-01 |
| <i>FBXO38</i>          | -1,03 | 4,71E-01 | 7,27E-01 |
| <i>HOXC8</i>           | -1,02 | 4,71E-01 | 7,27E-01 |
| <i>A_24_P921421</i>    | -1,02 | 4,71E-01 | 7,27E-01 |
| <i>LILRB3</i>          | 1,10  | 4,72E-01 | 7,27E-01 |
| <i>RPL41</i>           | -1,04 | 4,72E-01 | 7,28E-01 |
| <i>A_24_P143257</i>    | -1,03 | 4,72E-01 | 7,28E-01 |
| <i>UNQ501</i>          | -1,03 | 4,72E-01 | 7,28E-01 |
| <i>ADAMTSL5</i>        | 1,06  | 4,72E-01 | 7,28E-01 |
| <i>SQLE</i>            | -1,08 | 4,72E-01 | 7,28E-01 |
| <i>ASIP</i>            | -1,03 | 4,72E-01 | 7,28E-01 |
| <i>THC2393168</i>      | -1,04 | 4,72E-01 | 7,28E-01 |
| <i>A_24_P375132</i>    | 1,06  | 4,72E-01 | 7,28E-01 |
| <i>KIAA0649</i>        | -1,03 | 4,72E-01 | 7,28E-01 |
| <i>LDOC1L</i>          | -1,03 | 4,72E-01 | 7,28E-01 |
| <i>CNTD1</i>           | -1,06 | 4,72E-01 | 7,28E-01 |

|                        |       |          |          |
|------------------------|-------|----------|----------|
| <i>FLJ32867</i>        | -1,05 | 4,72E-01 | 7,28E-01 |
| <i>KCNE2</i>           | 1,03  | 4,72E-01 | 7,28E-01 |
| <i>A_24_P230195</i>    | 1,07  | 4,72E-01 | 7,28E-01 |
| <i>ADAMDEC1</i>        | -1,04 | 4,72E-01 | 7,28E-01 |
| <i>ACP2</i>            | 1,03  | 4,72E-01 | 7,28E-01 |
| <i>THC2414484</i>      | -1,03 | 4,73E-01 | 7,28E-01 |
| <i>A_24_P67308</i>     | -1,03 | 4,73E-01 | 7,28E-01 |
| <i>C7orf30</i>         | 1,02  | 4,73E-01 | 7,28E-01 |
| <i>A_32_P144381</i>    | 1,03  | 4,73E-01 | 7,28E-01 |
| <i>THC2283706</i>      | -1,09 | 4,73E-01 | 7,28E-01 |
| <i>LOC654340</i>       | -1,03 | 4,73E-01 | 7,28E-01 |
| <i>DMBT1</i>           | -1,03 | 4,73E-01 | 7,28E-01 |
| <i>ATG4D</i>           | -1,02 | 4,73E-01 | 7,28E-01 |
| <i>A_24_P290087</i>    | 1,33  | 4,73E-01 | 7,28E-01 |
| <i>A_23_P200955</i>    | -1,06 | 4,73E-01 | 7,29E-01 |
| <i>POLB</i>            | -1,03 | 4,73E-01 | 7,29E-01 |
| <i>PRRT2</i>           | -1,08 | 4,73E-01 | 7,29E-01 |
| <i>SLC18A2</i>         | 1,18  | 4,73E-01 | 7,29E-01 |
| <i>CR615016</i>        | -1,07 | 4,73E-01 | 7,29E-01 |
| <i>A_32_P227400</i>    | -1,03 | 4,73E-01 | 7,29E-01 |
| <i>BX099457</i>        | 1,04  | 4,73E-01 | 7,29E-01 |
| <i>GNAZ</i>            | 1,11  | 4,73E-01 | 7,29E-01 |
| <i>AK025173</i>        | -1,03 | 4,73E-01 | 7,29E-01 |
| <i>KIRREL3</i>         | 1,03  | 4,73E-01 | 7,29E-01 |
| <i>BC035669</i>        | 1,03  | 4,73E-01 | 7,29E-01 |
| <i>VPS29</i>           | 1,03  | 4,73E-01 | 7,29E-01 |
| <i>NDOR1</i>           | 1,04  | 4,73E-01 | 7,29E-01 |
| <i>OR51D1</i>          | 1,02  | 4,73E-01 | 7,29E-01 |
| <i>ENST00000288911</i> | -1,05 | 4,73E-01 | 7,29E-01 |
| <i>ENST00000370659</i> | -1,04 | 4,73E-01 | 7,29E-01 |
| <i>AL566369</i>        | 1,04  | 4,73E-01 | 7,29E-01 |
| <i>A_24_P409440</i>    | -1,04 | 4,74E-01 | 7,29E-01 |
| <i>THC2364015</i>      | -1,02 | 4,74E-01 | 7,29E-01 |
| <i>INPP5A</i>          | 1,05  | 4,74E-01 | 7,29E-01 |
| <i>A_24_P910230</i>    | -1,03 | 4,74E-01 | 7,29E-01 |
| <i>KIAA0999</i>        | 1,03  | 4,74E-01 | 7,29E-01 |
| <i>MAGEA9</i>          | 1,03  | 4,74E-01 | 7,29E-01 |
| <i>ENST00000334647</i> | 1,05  | 4,74E-01 | 7,29E-01 |
| <i>ATG9A</i>           | 1,02  | 4,74E-01 | 7,29E-01 |
| <i>A_32_P105893</i>    | -1,04 | 4,74E-01 | 7,29E-01 |
| <i>76P</i>             | -1,02 | 4,74E-01 | 7,29E-01 |
| <i>PA2G4</i>           | 1,02  | 4,74E-01 | 7,29E-01 |
| <i>ENST00000272845</i> | -1,03 | 4,74E-01 | 7,29E-01 |
| <i>M6PR</i>            | -1,02 | 4,74E-01 | 7,29E-01 |

|                 |       |          |          |
|-----------------|-------|----------|----------|
| AK024304        | 1,03  | 4,74E-01 | 7,29E-01 |
| UTY             | 1,02  | 4,74E-01 | 7,29E-01 |
| AI078143        | -1,04 | 4,74E-01 | 7,29E-01 |
| PTPLA           | 1,09  | 4,74E-01 | 7,29E-01 |
| A_32_P40348     | -1,03 | 4,74E-01 | 7,29E-01 |
| PLDN            | 1,02  | 4,74E-01 | 7,29E-01 |
| LOC283970       | 1,03  | 4,74E-01 | 7,29E-01 |
| CAGE1           | 1,03  | 4,74E-01 | 7,29E-01 |
| ENST00000379287 | 1,04  | 4,74E-01 | 7,30E-01 |
| A_32_P210691    | -1,04 | 4,74E-01 | 7,30E-01 |
| THC2435239      | -1,04 | 4,74E-01 | 7,30E-01 |
| AF143888        | 1,04  | 4,74E-01 | 7,30E-01 |
| C12orf43        | -1,02 | 4,75E-01 | 7,30E-01 |
| A_32_P7193      | 1,04  | 4,75E-01 | 7,30E-01 |
| FBXO15          | -1,04 | 4,75E-01 | 7,30E-01 |
| LRP5            | 1,03  | 4,75E-01 | 7,30E-01 |
| AK054684        | 1,04  | 4,75E-01 | 7,30E-01 |
| C9orf131        | 1,02  | 4,75E-01 | 7,30E-01 |
| LOC130951       | -1,02 | 4,75E-01 | 7,30E-01 |
| RP11-564C4.1    | -1,02 | 4,75E-01 | 7,30E-01 |
| A_24_P681563    | 1,08  | 4,75E-01 | 7,30E-01 |
| THC2314457      | -1,03 | 4,75E-01 | 7,30E-01 |
| BCL7C           | 1,02  | 4,75E-01 | 7,31E-01 |
| AA278755        | 1,02  | 4,75E-01 | 7,31E-01 |
| ENST00000381961 | 1,03  | 4,75E-01 | 7,31E-01 |
| A_24_P221335    | 1,02  | 4,75E-01 | 7,31E-01 |
| API5            | -1,03 | 4,76E-01 | 7,31E-01 |
| KCNK13          | -1,03 | 4,76E-01 | 7,31E-01 |
| ASB12           | -1,03 | 4,76E-01 | 7,31E-01 |
| THC2324000      | 1,02  | 4,76E-01 | 7,31E-01 |
| A_24_P255874    | 1,02  | 4,76E-01 | 7,31E-01 |
| SERHL           | -1,03 | 4,76E-01 | 7,31E-01 |
| LOC146517       | 1,03  | 4,76E-01 | 7,31E-01 |
| USP6            | -1,03 | 4,76E-01 | 7,31E-01 |
| AK001089        | 1,02  | 4,76E-01 | 7,31E-01 |
| A_24_P24890     | 1,06  | 4,76E-01 | 7,31E-01 |
| ENST00000383748 | -1,05 | 4,76E-01 | 7,31E-01 |
| NDST3           | -1,07 | 4,76E-01 | 7,31E-01 |
| ACIN1           | 1,03  | 4,76E-01 | 7,31E-01 |
| NELL2           | 1,13  | 4,76E-01 | 7,31E-01 |
| MRGPRX1         | 1,06  | 4,76E-01 | 7,31E-01 |
| A_24_P135391    | -1,03 | 4,76E-01 | 7,31E-01 |
| DHX37           | -1,02 | 4,76E-01 | 7,31E-01 |
| NEK9            | 1,04  | 4,76E-01 | 7,31E-01 |

|                        |       |          |          |
|------------------------|-------|----------|----------|
| <i>HLA-A</i>           | -1,03 | 4,76E-01 | 7,31E-01 |
| <i>BQ374929</i>        | 1,05  | 4,76E-01 | 7,31E-01 |
| <i>OR7C2</i>           | 1,03  | 4,76E-01 | 7,31E-01 |
| <i>RPL24</i>           | -1,02 | 4,76E-01 | 7,31E-01 |
| <i>ITM2A</i>           | -1,07 | 4,76E-01 | 7,31E-01 |
| <i>A_24_P772921</i>    | -1,04 | 4,77E-01 | 7,31E-01 |
| <i>RPL23AP7</i>        | -1,03 | 4,77E-01 | 7,31E-01 |
| <i>ABCE1</i>           | -1,03 | 4,77E-01 | 7,31E-01 |
| <i>HIBADH</i>          | -1,03 | 4,77E-01 | 7,31E-01 |
| <i>A_24_P144314</i>    | 1,03  | 4,77E-01 | 7,32E-01 |
| <i>AF075008</i>        | 1,03  | 4,77E-01 | 7,32E-01 |
| <i>F12</i>             | 1,08  | 4,77E-01 | 7,32E-01 |
| <i>PCDHB6</i>          | -1,04 | 4,77E-01 | 7,32E-01 |
| <i>AK130118</i>        | -1,07 | 4,77E-01 | 7,32E-01 |
| <i>CLOCK</i>           | -1,04 | 4,77E-01 | 7,32E-01 |
| <i>PROC</i>            | -1,03 | 4,77E-01 | 7,32E-01 |
| <i>GALK1</i>           | -1,03 | 4,77E-01 | 7,32E-01 |
| <i>A_32_P231114</i>    | -1,02 | 4,77E-01 | 7,32E-01 |
| <i>A_24_P290263</i>    | -1,02 | 4,77E-01 | 7,32E-01 |
| <i>BC020341</i>        | 1,05  | 4,77E-01 | 7,32E-01 |
| <i>THC2282958</i>      | 1,05  | 4,77E-01 | 7,32E-01 |
| <i>USF1</i>            | 1,05  | 4,77E-01 | 7,32E-01 |
| <i>A_24_P820201</i>    | 1,03  | 4,77E-01 | 7,32E-01 |
| <i>CDH7</i>            | 1,03  | 4,77E-01 | 7,32E-01 |
| <i>ENST00000371461</i> | -1,04 | 4,78E-01 | 7,32E-01 |
| <i>ATP6V0A4</i>        | -1,04 | 4,77E-01 | 7,32E-01 |
| <i>SORD</i>            | -1,04 | 4,78E-01 | 7,32E-01 |
| <i>FOX11</i>           | -1,03 | 4,78E-01 | 7,32E-01 |
| <i>THC2409299</i>      | -1,03 | 4,78E-01 | 7,32E-01 |
| <i>A_24_P375683</i>    | -1,03 | 4,78E-01 | 7,32E-01 |
| <i>APEX2</i>           | -1,03 | 4,78E-01 | 7,32E-01 |
| <i>ENST00000359491</i> | -1,03 | 4,78E-01 | 7,32E-01 |
| <i>THC2413163</i>      | 1,02  | 4,78E-01 | 7,32E-01 |
| <i>DMC1</i>            | 1,02  | 4,78E-01 | 7,32E-01 |
| <i>MAGOH</i>           | 1,03  | 4,78E-01 | 7,32E-01 |
| <i>ATAD3B</i>          | 1,03  | 4,78E-01 | 7,32E-01 |
| <i>A_24_P917332</i>    | 1,03  | 4,78E-01 | 7,32E-01 |
| <i>SLC26A6</i>         | 1,03  | 4,78E-01 | 7,32E-01 |
| <i>C21orf70</i>        | 1,04  | 4,78E-01 | 7,32E-01 |
| <i>ADAM23</i>          | 1,06  | 4,78E-01 | 7,32E-01 |
| <i>A_24_P942661</i>    | -1,03 | 4,78E-01 | 7,32E-01 |
| <i>GABRA4</i>          | -1,02 | 4,78E-01 | 7,32E-01 |
| <i>BTBD10</i>          | -1,03 | 4,78E-01 | 7,32E-01 |
| <i>FAIM3</i>           | 1,03  | 4,78E-01 | 7,32E-01 |

|                        |       |          |          |
|------------------------|-------|----------|----------|
| <i>BC031304</i>        | 1,03  | 4,78E-01 | 7,32E-01 |
| <i>CCDC101</i>         | -1,04 | 4,78E-01 | 7,32E-01 |
| <i>THC2304374</i>      | -1,03 | 4,78E-01 | 7,32E-01 |
| <i>CCR6</i>            | 1,03  | 4,78E-01 | 7,33E-01 |
| <i>THC2378275</i>      | -1,03 | 4,78E-01 | 7,33E-01 |
| <i>SLIC1</i>           | -1,03 | 4,78E-01 | 7,33E-01 |
| <i>TMEM53</i>          | 1,03  | 4,79E-01 | 7,33E-01 |
| <i>CDH22</i>           | 1,05  | 4,79E-01 | 7,33E-01 |
| <i>EPHA10</i>          | 1,02  | 4,79E-01 | 7,33E-01 |
| <i>ENST00000273075</i> | 1,02  | 4,79E-01 | 7,33E-01 |
| <i>MAZ</i>             | -1,02 | 4,79E-01 | 7,33E-01 |
| <i>ZNF583</i>          | -1,03 | 4,79E-01 | 7,33E-01 |
| <i>WHSC2</i>           | -1,03 | 4,79E-01 | 7,33E-01 |
| <i>HIST1H3A</i>        | 1,02  | 4,79E-01 | 7,33E-01 |
| <i>NRD1</i>            | 1,02  | 4,79E-01 | 7,33E-01 |
| <i>UBXD1</i>           | 1,02  | 4,79E-01 | 7,33E-01 |
| <i>TXNL4A</i>          | 1,04  | 4,79E-01 | 7,33E-01 |
| <i>IFI27</i>           | 1,05  | 4,79E-01 | 7,33E-01 |
| <i>CALD1</i>           | 1,06  | 4,79E-01 | 7,33E-01 |
| <i>ENST00000374314</i> | -1,06 | 4,79E-01 | 7,33E-01 |
| <i>AL521247</i>        | -1,05 | 4,79E-01 | 7,33E-01 |
| <i>CTH</i>             | -1,04 | 4,79E-01 | 7,33E-01 |
| <i>USP22</i>           | -1,02 | 4,79E-01 | 7,33E-01 |
| <i>SRPK2</i>           | -1,02 | 4,79E-01 | 7,33E-01 |
| <i>TNRC6B</i>          | -1,02 | 4,79E-01 | 7,33E-01 |
| <i>MGC46336</i>        | 1,04  | 4,79E-01 | 7,33E-01 |
| <i>C1orf122</i>        | 1,05  | 4,79E-01 | 7,33E-01 |
| <i>THC2281107</i>      | 1,03  | 4,79E-01 | 7,33E-01 |
| <i>LOC142937</i>       | -1,04 | 4,80E-01 | 7,34E-01 |
| <i>B3GNT8</i>          | -1,05 | 4,80E-01 | 7,34E-01 |
| <i>AA969677</i>        | -1,03 | 4,80E-01 | 7,34E-01 |
| <i>BC040870</i>        | 1,03  | 4,80E-01 | 7,34E-01 |
| <i>SRP46</i>           | -1,04 | 4,80E-01 | 7,34E-01 |
| <i>BC010615</i>        | -1,03 | 4,80E-01 | 7,34E-01 |
| <i>CSG1cA-T</i>        | -1,04 | 4,80E-01 | 7,34E-01 |
| <i>DNAJB6</i>          | 1,02  | 4,80E-01 | 7,34E-01 |
| <i>ENST00000319822</i> | 1,04  | 4,80E-01 | 7,34E-01 |
| <i>A_24_P340916</i>    | -1,02 | 4,80E-01 | 7,34E-01 |
| <i>AK026826</i>        | 1,08  | 4,80E-01 | 7,34E-01 |
| <i>CR595483</i>        | 1,03  | 4,80E-01 | 7,34E-01 |
| <i>CDC26</i>           | 1,03  | 4,80E-01 | 7,34E-01 |
| <i>KLF17</i>           | 1,05  | 4,80E-01 | 7,34E-01 |
| <i>C8orf1</i>          | 1,08  | 4,80E-01 | 7,34E-01 |
| <i>THC2442829</i>      | 1,02  | 4,80E-01 | 7,34E-01 |

|                        |       |          |          |
|------------------------|-------|----------|----------|
| <i>A_24_P246748</i>    | -1,02 | 4,80E-01 | 7,34E-01 |
| <i>SULT1C2</i>         | 1,05  | 4,80E-01 | 7,34E-01 |
| <i>A_24_P75748</i>     | 1,08  | 4,80E-01 | 7,34E-01 |
| <i>OVGP1</i>           | -1,04 | 4,80E-01 | 7,34E-01 |
| <i>DNAH7</i>           | -1,03 | 4,80E-01 | 7,34E-01 |
| <i>CLCA1</i>           | -1,03 | 4,80E-01 | 7,34E-01 |
| <i>KIAA0586</i>        | -1,02 | 4,80E-01 | 7,34E-01 |
| <i>ENST00000293695</i> | -1,03 | 4,81E-01 | 7,35E-01 |
| <i>A_32_P218436</i>    | -1,03 | 4,81E-01 | 7,35E-01 |
| <i>A_23_P207143</i>    | -1,03 | 4,81E-01 | 7,35E-01 |
| <i>A_24_P272886</i>    | 1,03  | 4,81E-01 | 7,35E-01 |
| <i>EMP3</i>            | 1,04  | 4,81E-01 | 7,35E-01 |
| <i>CA1</i>             | 1,05  | 4,81E-01 | 7,35E-01 |
| <i>THC2330271</i>      | 1,03  | 4,81E-01 | 7,35E-01 |
| <i>A_24_P921832</i>    | 1,03  | 4,81E-01 | 7,35E-01 |
| <i>BC008667</i>        | 1,04  | 4,81E-01 | 7,35E-01 |
| <i>BG115931</i>        | -1,05 | 4,81E-01 | 7,35E-01 |
| <i>ZNF435</i>          | -1,03 | 4,81E-01 | 7,35E-01 |
| <i>AK000246</i>        | -1,03 | 4,81E-01 | 7,35E-01 |
| <i>A_24_P565540</i>    | 1,03  | 4,81E-01 | 7,35E-01 |
| <i>C1orf149</i>        | 1,03  | 4,81E-01 | 7,35E-01 |
| <i>A_23_P147970</i>    | 1,03  | 4,81E-01 | 7,35E-01 |
| <i>HEMGN</i>           | 1,09  | 4,81E-01 | 7,35E-01 |
| <i>UTP11L</i>          | 1,05  | 4,81E-01 | 7,35E-01 |
| <i>CCND3</i>           | 1,03  | 4,81E-01 | 7,35E-01 |
| <i>AK093416</i>        | -1,05 | 4,82E-01 | 7,35E-01 |
| <i>C4orf22</i>         | -1,04 | 4,82E-01 | 7,35E-01 |
| <i>SMUG1</i>           | 1,02  | 4,82E-01 | 7,35E-01 |
| <i>THC2314320</i>      | 1,03  | 4,82E-01 | 7,35E-01 |
| <i>AK093639</i>        | -1,02 | 4,82E-01 | 7,35E-01 |
| <i>TRPM3</i>           | -1,03 | 4,82E-01 | 7,35E-01 |
| <i>C12orf59</i>        | 1,03  | 4,82E-01 | 7,35E-01 |
| <i>A_24_P929429</i>    | 1,03  | 4,82E-01 | 7,35E-01 |
| <i>A_24_P740022</i>    | -1,04 | 4,82E-01 | 7,35E-01 |
| <i>MGST1</i>           | -1,07 | 4,82E-01 | 7,35E-01 |
| <i>ENST00000369746</i> | -1,03 | 4,82E-01 | 7,35E-01 |
| <i>OTUD3</i>           | -1,02 | 4,82E-01 | 7,35E-01 |
| <i>BC015334</i>        | -1,02 | 4,82E-01 | 7,35E-01 |
| <i>TIAM1</i>           | -1,04 | 4,82E-01 | 7,35E-01 |
| <i>OCRL</i>            | -1,03 | 4,82E-01 | 7,35E-01 |
| <i>SNX24</i>           | -1,04 | 4,82E-01 | 7,35E-01 |
| <i>FAM100A</i>         | -1,03 | 4,82E-01 | 7,35E-01 |
| <i>NDUFA5</i>          | 1,03  | 4,82E-01 | 7,35E-01 |
| <i>A_32_P57844</i>     | 1,04  | 4,82E-01 | 7,35E-01 |



|                        |       |          |          |
|------------------------|-------|----------|----------|
| <i>C21orf129</i>       | -1,03 | 4,82E-01 | 7,36E-01 |
| <i>REG1A</i>           | -1,03 | 4,82E-01 | 7,36E-01 |
| <i>A_24_P457226</i>    | -1,03 | 4,82E-01 | 7,36E-01 |
| <i>C9orf74</i>         | -1,02 | 4,82E-01 | 7,36E-01 |
| <i>SLC8A2</i>          | -1,08 | 4,82E-01 | 7,36E-01 |
| <i>FAM98A</i>          | -1,04 | 4,83E-01 | 7,36E-01 |
| <i>A_24_P944185</i>    | 1,04  | 4,83E-01 | 7,36E-01 |
| <i>C1orf116</i>        | -1,08 | 4,83E-01 | 7,36E-01 |
| <i>THC2292525</i>      | -1,03 | 4,83E-01 | 7,36E-01 |
| <i>B4GALNT3</i>        | -1,02 | 4,83E-01 | 7,36E-01 |
| <i>BX281397</i>        | 1,03  | 4,83E-01 | 7,36E-01 |
| <i>THC2317029</i>      | -1,05 | 4,83E-01 | 7,36E-01 |
| <i>TTY12</i>           | 1,07  | 4,83E-01 | 7,36E-01 |
| <i>MRPS11</i>          | -1,02 | 4,83E-01 | 7,36E-01 |
| <i>IGSF8</i>           | 1,04  | 4,83E-01 | 7,36E-01 |
| <i>LILRA4</i>          | -1,04 | 4,83E-01 | 7,36E-01 |
| <i>A_24_P919553</i>    | -1,03 | 4,83E-01 | 7,36E-01 |
| <i>CESK1</i>           | 1,03  | 4,83E-01 | 7,36E-01 |
| <i>CCM2</i>            | 1,02  | 4,83E-01 | 7,36E-01 |
| <i>SEC24C</i>          | 1,03  | 4,83E-01 | 7,36E-01 |
| <i>TPP2</i>            | -1,02 | 4,83E-01 | 7,37E-01 |
| <i>LOC388242</i>       | -1,06 | 4,83E-01 | 7,37E-01 |
| <i>C20orf121</i>       | -1,03 | 4,83E-01 | 7,37E-01 |
| <i>A_24_P897062</i>    | -1,04 | 4,84E-01 | 7,37E-01 |
| <i>SERINC1</i>         | -1,03 | 4,84E-01 | 7,37E-01 |
| <i>AK098629</i>        | 1,05  | 4,84E-01 | 7,37E-01 |
| <i>ENST00000379734</i> | -1,03 | 4,84E-01 | 7,37E-01 |
| <i>SCRT2</i>           | 1,07  | 4,84E-01 | 7,37E-01 |
| <i>PPT1</i>            | -1,03 | 4,84E-01 | 7,37E-01 |
| <i>LRTM1</i>           | 1,03  | 4,84E-01 | 7,37E-01 |
| <i>GCDH</i>            | -1,03 | 4,84E-01 | 7,37E-01 |
| <i>PUM2</i>            | -1,03 | 4,84E-01 | 7,37E-01 |
| <i>CGI-115</i>         | 1,03  | 4,84E-01 | 7,37E-01 |
| <i>ASTN</i>            | -1,08 | 4,84E-01 | 7,37E-01 |
| <i>DDI2</i>            | -1,04 | 4,84E-01 | 7,37E-01 |
| <i>THC2343426</i>      | -1,03 | 4,84E-01 | 7,37E-01 |
| <i>PGLS</i>            | -1,03 | 4,84E-01 | 7,37E-01 |
| <i>NDUFA12</i>         | 1,02  | 4,84E-01 | 7,37E-01 |
| <i>THC2314817</i>      | 1,03  | 4,84E-01 | 7,37E-01 |
| <i>FOXA1</i>           | 1,04  | 4,84E-01 | 7,37E-01 |
| <i>AA885134</i>        | -1,02 | 4,84E-01 | 7,37E-01 |
| <i>PMCHL1</i>          | 1,03  | 4,84E-01 | 7,37E-01 |
| <i>CRX</i>             | 1,03  | 4,84E-01 | 7,37E-01 |
| <i>DDI1</i>            | 1,03  | 4,84E-01 | 7,37E-01 |

|                        |       |          |          |
|------------------------|-------|----------|----------|
| <i>TMBIM4</i>          | -1,03 | 4,84E-01 | 7,37E-01 |
| <i>A_24_P929289</i>    | -1,03 | 4,84E-01 | 7,37E-01 |
| <i>SIX4</i>            | -1,04 | 4,84E-01 | 7,37E-01 |
| <i>L26969</i>          | -1,04 | 4,84E-01 | 7,37E-01 |
| <i>AY672103</i>        | -1,03 | 4,84E-01 | 7,37E-01 |
| <i>CR740913</i>        | -1,03 | 4,85E-01 | 7,37E-01 |
| <i>AK093532</i>        | -1,02 | 4,85E-01 | 7,38E-01 |
| <i>A_24_P401663</i>    | 1,07  | 4,85E-01 | 7,38E-01 |
| <i>CTDSPL</i>          | -1,03 | 4,85E-01 | 7,38E-01 |
| <i>A_24_P924143</i>    | 1,03  | 4,85E-01 | 7,38E-01 |
| <i>LOC645904</i>       | -1,05 | 4,85E-01 | 7,38E-01 |
| <i>DEFB103A</i>        | 1,11  | 4,85E-01 | 7,38E-01 |
| <i>AK056119</i>        | -1,04 | 4,85E-01 | 7,38E-01 |
| <i>A_32_P111507</i>    | -1,03 | 4,85E-01 | 7,38E-01 |
| <i>A_32_P138933</i>    | -1,03 | 4,85E-01 | 7,38E-01 |
| <i>GPBP1L1</i>         | -1,02 | 4,85E-01 | 7,38E-01 |
| <i>NUDT21</i>          | 1,02  | 4,85E-01 | 7,38E-01 |
| <i>C17orf74</i>        | -1,03 | 4,85E-01 | 7,38E-01 |
| <i>THC2333977</i>      | -1,03 | 4,85E-01 | 7,38E-01 |
| <i>A_24_P811954</i>    | 1,04  | 4,85E-01 | 7,38E-01 |
| <i>LOC283130</i>       | 1,02  | 4,85E-01 | 7,38E-01 |
| <i>ENST00000252773</i> | -1,03 | 4,86E-01 | 7,38E-01 |
| <i>ENST00000371408</i> | -1,03 | 4,86E-01 | 7,38E-01 |
| <i>ZNF281</i>          | -1,03 | 4,86E-01 | 7,38E-01 |
| <i>DIP2B</i>           | 1,02  | 4,86E-01 | 7,38E-01 |
| <i>AD7C-NTP</i>        | 1,03  | 4,86E-01 | 7,38E-01 |
| <i>LOC253012</i>       | 1,03  | 4,86E-01 | 7,38E-01 |
| <i>KPNA3</i>           | 1,04  | 4,86E-01 | 7,38E-01 |
| <i>A_24_P654314</i>    | -1,02 | 4,86E-01 | 7,38E-01 |
| <i>CEP164</i>          | -1,02 | 4,86E-01 | 7,38E-01 |
| <i>LOC441632</i>       | -1,04 | 4,86E-01 | 7,38E-01 |
| <i>DGCR5</i>           | 1,03  | 4,86E-01 | 7,38E-01 |
| <i>LRAP</i>            | -1,14 | 4,86E-01 | 7,38E-01 |
| <i>PVRL4</i>           | -1,05 | 4,86E-01 | 7,38E-01 |
| <i>SLC35A2</i>         | -1,04 | 4,86E-01 | 7,38E-01 |
| <i>ZNF433</i>          | -1,03 | 4,86E-01 | 7,38E-01 |
| <i>GRK1</i>            | 1,03  | 4,86E-01 | 7,38E-01 |
| <i>THC2296649</i>      | -1,04 | 4,86E-01 | 7,38E-01 |
| <i>A_32_P306001</i>    | 1,03  | 4,86E-01 | 7,38E-01 |
| <i>A_24_P75399</i>     | -1,04 | 4,86E-01 | 7,38E-01 |
| <i>GLYCAM1</i>         | 1,03  | 4,86E-01 | 7,38E-01 |
| <i>THC2442158</i>      | 1,03  | 4,86E-01 | 7,38E-01 |
| <i>AW081766</i>        | 1,03  | 4,86E-01 | 7,39E-01 |
| <i>THC2452631</i>      | 1,02  | 4,86E-01 | 7,39E-01 |

|                     |       |          |          |
|---------------------|-------|----------|----------|
| <i>TTY4C</i>        | 1,04  | 4,86E-01 | 7,39E-01 |
| <i>OPLAH</i>        | -1,05 | 4,86E-01 | 7,39E-01 |
| <i>RSHL2</i>        | 1,03  | 4,86E-01 | 7,39E-01 |
| <i>PPBP</i>         | 1,14  | 4,86E-01 | 7,39E-01 |
| <i>BE644757</i>     | -1,07 | 4,86E-01 | 7,39E-01 |
| <i>AK096402</i>     | 1,02  | 4,86E-01 | 7,39E-01 |
| <i>MAL</i>          | -1,13 | 4,87E-01 | 7,39E-01 |
| <i>BC014395</i>     | -1,03 | 4,87E-01 | 7,39E-01 |
| <i>A_24_P887805</i> | 1,02  | 4,87E-01 | 7,39E-01 |
| <i>BG620990</i>     | 1,05  | 4,87E-01 | 7,39E-01 |
| <i>THC2339952</i>   | -1,04 | 4,87E-01 | 7,39E-01 |
| <i>THC2404145</i>   | -1,03 | 4,87E-01 | 7,39E-01 |
| <i>THC2412623</i>   | -1,03 | 4,87E-01 | 7,39E-01 |
| <i>MRPS33</i>       | -1,02 | 4,87E-01 | 7,39E-01 |
| <i>LRRN6D</i>       | 1,03  | 4,87E-01 | 7,39E-01 |
| <i>OVOS2</i>        | 1,08  | 4,87E-01 | 7,39E-01 |
| <i>THC2446669</i>   | -1,09 | 4,87E-01 | 7,39E-01 |
| <i>TLL2</i>         | -1,06 | 4,87E-01 | 7,39E-01 |
| <i>A_24_P552131</i> | -1,04 | 4,87E-01 | 7,39E-01 |
| <i>TAOK3</i>        | -1,04 | 4,87E-01 | 7,39E-01 |
| <i>C18orf43</i>     | -1,03 | 4,87E-01 | 7,39E-01 |
| <i>CCT6A</i>        | 1,02  | 4,87E-01 | 7,39E-01 |
| <i>THC2400705</i>   | 1,03  | 4,87E-01 | 7,39E-01 |
| <i>NODAL</i>        | 1,03  | 4,87E-01 | 7,39E-01 |
| <i>LHFPL2</i>       | 1,05  | 4,87E-01 | 7,39E-01 |
| <i>BVES</i>         | 1,06  | 4,87E-01 | 7,39E-01 |
| <i>NOMO1</i>        | 1,03  | 4,87E-01 | 7,39E-01 |
| <i>ASPM</i>         | -1,04 | 4,87E-01 | 7,39E-01 |
| <i>CCDC48</i>       | -1,07 | 4,87E-01 | 7,39E-01 |
| <i>RPGRIP1</i>      | -1,03 | 4,87E-01 | 7,39E-01 |
| <i>A_32_P167212</i> | 1,08  | 4,87E-01 | 7,39E-01 |
| <i>A_32_P133926</i> | -1,05 | 4,87E-01 | 7,39E-01 |
| <i>FYCO1</i>        | 1,03  | 4,87E-01 | 7,39E-01 |
| <i>RASL11B</i>      | 1,06  | 4,87E-01 | 7,39E-01 |
| <i>ARL6IP4</i>      | 1,02  | 4,88E-01 | 7,39E-01 |
| <i>LOC284296</i>    | -1,02 | 4,88E-01 | 7,39E-01 |
| <i>THC2346747</i>   | 1,03  | 4,88E-01 | 7,39E-01 |
| <i>FLJ10986</i>     | 1,04  | 4,88E-01 | 7,39E-01 |
| <i>A_24_P708363</i> | 1,04  | 4,88E-01 | 7,39E-01 |
| <i>TARSL1</i>       | -1,02 | 4,88E-01 | 7,40E-01 |
| <i>HSPA12B</i>      | 1,03  | 4,88E-01 | 7,40E-01 |
| <i>THC2317998</i>   | 1,03  | 4,88E-01 | 7,40E-01 |
| <i>THC2344622</i>   | 1,03  | 4,88E-01 | 7,40E-01 |
| <i>ART3</i>         | 1,09  | 4,88E-01 | 7,40E-01 |

|                        |       |          |          |
|------------------------|-------|----------|----------|
| <i>C9orf57</i>         | 1,03  | 4,88E-01 | 7,40E-01 |
| <i>A_24_P307368</i>    | -1,02 | 4,88E-01 | 7,40E-01 |
| <i>CPNE9</i>           | 1,03  | 4,88E-01 | 7,40E-01 |
| <i>FLII</i>            | 1,02  | 4,88E-01 | 7,40E-01 |
| <i>THC2381707</i>      | -1,05 | 4,89E-01 | 7,40E-01 |
| <i>REXO4</i>           | -1,04 | 4,88E-01 | 7,40E-01 |
| <i>AK127904</i>        | -1,03 | 4,89E-01 | 7,40E-01 |
| <i>A_32_P217271</i>    | -1,03 | 4,88E-01 | 7,40E-01 |
| <i>A_32_P200357</i>    | -1,03 | 4,89E-01 | 7,40E-01 |
| <i>MS4A5</i>           | -1,02 | 4,89E-01 | 7,40E-01 |
| <i>A_24_P15973</i>     | 1,02  | 4,89E-01 | 7,40E-01 |
| <i>THC2450147</i>      | -1,03 | 4,89E-01 | 7,40E-01 |
| <i>KIAA1009</i>        | -1,02 | 4,89E-01 | 7,40E-01 |
| <i>ZC3H7B</i>          | -1,03 | 4,89E-01 | 7,40E-01 |
| <i>C14orf79</i>        | -1,03 | 4,89E-01 | 7,40E-01 |
| <i>DEFB127</i>         | 1,04  | 4,89E-01 | 7,40E-01 |
| <i>THC2384147</i>      | 1,02  | 4,89E-01 | 7,40E-01 |
| <i>GTA</i>             | 1,03  | 4,89E-01 | 7,40E-01 |
| <i>FLJ39534</i>        | -1,03 | 4,89E-01 | 7,40E-01 |
| <i>ENST00000304758</i> | -1,03 | 4,89E-01 | 7,40E-01 |
| <i>A_24_P281447</i>    | -1,02 | 4,89E-01 | 7,40E-01 |
| <i>MSL3L1</i>          | -1,02 | 4,89E-01 | 7,40E-01 |
| <i>ENST00000375256</i> | 1,02  | 4,89E-01 | 7,40E-01 |
| <i>AP2S1</i>           | 1,03  | 4,89E-01 | 7,40E-01 |
| <i>BC047717</i>        | 1,04  | 4,89E-01 | 7,40E-01 |
| <i>AK125648</i>        | 1,04  | 4,89E-01 | 7,40E-01 |
| <i>PSMA8</i>           | 1,03  | 4,89E-01 | 7,40E-01 |
| <i>ILVBL</i>           | -1,03 | 4,89E-01 | 7,40E-01 |
| <i>A_24_P204454</i>    | -1,03 | 4,89E-01 | 7,40E-01 |
| <i>RP3-510O8.5</i>     | 1,03  | 4,89E-01 | 7,41E-01 |
| <i>ACTL8</i>           | 1,14  | 4,90E-01 | 7,41E-01 |
| <i>DPEP2</i>           | 1,05  | 4,90E-01 | 7,41E-01 |
| <i>ENST00000308894</i> | -1,05 | 4,90E-01 | 7,41E-01 |
| <i>AW975013</i>        | -1,04 | 4,90E-01 | 7,41E-01 |
| <i>RPS2</i>            | -1,04 | 4,90E-01 | 7,41E-01 |
| <i>CD630738</i>        | 1,03  | 4,90E-01 | 7,41E-01 |
| <i>THC2333386</i>      | 1,04  | 4,90E-01 | 7,41E-01 |
| <i>ENST00000310560</i> | 1,03  | 4,90E-01 | 7,41E-01 |
| <i>RPL7</i>            | -1,03 | 4,90E-01 | 7,41E-01 |
| <i>SNX14</i>           | -1,02 | 4,90E-01 | 7,41E-01 |
| <i>AW973470</i>        | 1,03  | 4,90E-01 | 7,41E-01 |
| <i>ATP6V1G3</i>        | -1,03 | 4,90E-01 | 7,41E-01 |
| <i>KRTAP4-12</i>       | 1,02  | 4,90E-01 | 7,41E-01 |
| <i>OXER1</i>           | 1,02  | 4,90E-01 | 7,41E-01 |

|                 |       |          |          |
|-----------------|-------|----------|----------|
| NMNAT3          | 1,05  | 4,90E-01 | 7,41E-01 |
| AF308290        | -1,03 | 4,90E-01 | 7,41E-01 |
| THC2339959      | -1,02 | 4,90E-01 | 7,41E-01 |
| THC2371039      | 1,04  | 4,90E-01 | 7,41E-01 |
| NUDT9P1         | -1,04 | 4,90E-01 | 7,41E-01 |
| AF119879        | 1,03  | 4,90E-01 | 7,41E-01 |
| PSD2            | -1,04 | 4,91E-01 | 7,42E-01 |
| CTNNA2          | 1,02  | 4,91E-01 | 7,42E-01 |
| BQ447335        | 1,04  | 4,91E-01 | 7,42E-01 |
| ENST00000367960 | 1,06  | 4,91E-01 | 7,42E-01 |
| C1orf80         | -1,03 | 4,91E-01 | 7,42E-01 |
| VMD2L3          | -1,02 | 4,91E-01 | 7,42E-01 |
| TTY6            | 1,03  | 4,91E-01 | 7,42E-01 |
| OR2L13          | 1,03  | 4,91E-01 | 7,42E-01 |
| OSBPL11         | -1,04 | 4,91E-01 | 7,42E-01 |
| NRBF2           | 1,03  | 4,91E-01 | 7,42E-01 |
| CR622110        | -1,06 | 4,91E-01 | 7,42E-01 |
| C1orf106        | -1,05 | 4,91E-01 | 7,42E-01 |
| FHAD1           | -1,03 | 4,91E-01 | 7,42E-01 |
| PXT1            | -1,03 | 4,91E-01 | 7,42E-01 |
| OR4K17          | -1,03 | 4,92E-01 | 7,42E-01 |
| AF113009        | -1,02 | 4,91E-01 | 7,42E-01 |
| THC2408010      | 1,02  | 4,91E-01 | 7,42E-01 |
| LOC440173       | 1,03  | 4,91E-01 | 7,42E-01 |
| ENST00000367696 | 1,03  | 4,91E-01 | 7,42E-01 |
| LOC284648       | 1,03  | 4,91E-01 | 7,42E-01 |
| NPAL3           | 1,04  | 4,92E-01 | 7,42E-01 |
| CR598849        | 1,04  | 4,91E-01 | 7,42E-01 |
| N75427          | 1,05  | 4,91E-01 | 7,42E-01 |
| A_24_P25040     | 1,08  | 4,91E-01 | 7,42E-01 |
| CTNND2          | 1,09  | 4,91E-01 | 7,42E-01 |
| TNIK            | 1,04  | 4,92E-01 | 7,42E-01 |
| YIF1B           | -1,05 | 4,92E-01 | 7,42E-01 |
| COQ2            | -1,02 | 4,92E-01 | 7,42E-01 |
| KCNK17          | -1,11 | 4,92E-01 | 7,42E-01 |
| NKX2-2          | 1,02  | 4,92E-01 | 7,42E-01 |
| BC068045        | 1,03  | 4,92E-01 | 7,42E-01 |
| CYGB            | -1,05 | 4,92E-01 | 7,42E-01 |
| KIAA1191        | 1,02  | 4,92E-01 | 7,42E-01 |
| C18orf34        | -1,09 | 4,92E-01 | 7,43E-01 |
| AJ412041        | 1,03  | 4,92E-01 | 7,43E-01 |
| C8orf32         | 1,03  | 4,92E-01 | 7,43E-01 |
| AI820956        | -1,03 | 4,92E-01 | 7,43E-01 |
| A_24_P932822    | 1,02  | 4,92E-01 | 7,43E-01 |

|                 |       |          |          |
|-----------------|-------|----------|----------|
| OR51E2          | 1,06  | 4,92E-01 | 7,43E-01 |
| ADRA2C          | 1,12  | 4,92E-01 | 7,43E-01 |
| DB378326        | 1,03  | 4,92E-01 | 7,43E-01 |
| SLC6A11         | 1,03  | 4,92E-01 | 7,43E-01 |
| THC2279299      | -1,04 | 4,93E-01 | 7,43E-01 |
| RASL12          | 1,06  | 4,93E-01 | 7,43E-01 |
| TXNL5           | 1,04  | 4,93E-01 | 7,43E-01 |
| A_24_P170103    | 1,08  | 4,93E-01 | 7,43E-01 |
| ARL5A           | 1,02  | 4,93E-01 | 7,43E-01 |
| HYPK            | 1,02  | 4,93E-01 | 7,43E-01 |
| CYP4F2          | 1,06  | 4,93E-01 | 7,43E-01 |
| MTMR7           | 1,03  | 4,93E-01 | 7,43E-01 |
| AF086092        | 1,03  | 4,93E-01 | 7,43E-01 |
| SPRY2           | 1,06  | 4,93E-01 | 7,43E-01 |
| THC2282518      | 1,04  | 4,93E-01 | 7,43E-01 |
| A_24_P127462    | -1,05 | 4,93E-01 | 7,44E-01 |
| THC2445273      | 1,03  | 4,93E-01 | 7,44E-01 |
| A_24_P835388    | 1,05  | 4,93E-01 | 7,44E-01 |
| LRRRC59         | 1,06  | 4,93E-01 | 7,44E-01 |
| BCL6            | 1,07  | 4,93E-01 | 7,44E-01 |
| TGFB3           | 1,06  | 4,93E-01 | 7,44E-01 |
| CNN1            | 1,20  | 4,93E-01 | 7,44E-01 |
| GSTM4           | -1,08 | 4,93E-01 | 7,44E-01 |
| ARMCX4          | -1,03 | 4,93E-01 | 7,44E-01 |
| APOBEC3D        | -1,02 | 4,93E-01 | 7,44E-01 |
| CA771684        | -1,02 | 4,93E-01 | 7,44E-01 |
| SH2D2A          | 1,03  | 4,93E-01 | 7,44E-01 |
| BC030772        | -1,03 | 4,94E-01 | 7,44E-01 |
| LOC93349        | 1,02  | 4,94E-01 | 7,44E-01 |
| CD109           | 1,05  | 4,94E-01 | 7,44E-01 |
| C6orf68         | 1,02  | 4,94E-01 | 7,44E-01 |
| AK131023        | 1,02  | 4,94E-01 | 7,44E-01 |
| A_24_P712193    | 1,03  | 4,94E-01 | 7,44E-01 |
| ENST00000373310 | 1,02  | 4,94E-01 | 7,44E-01 |
| MRPL43          | -1,03 | 4,94E-01 | 7,44E-01 |
| A_24_P324084    | 1,06  | 4,94E-01 | 7,44E-01 |
| TBC1D21         | -1,04 | 4,94E-01 | 7,44E-01 |
| PPIA            | 1,03  | 4,94E-01 | 7,44E-01 |
| SEMA4D          | -1,04 | 4,94E-01 | 7,44E-01 |
| THC2441492      | 1,02  | 4,94E-01 | 7,44E-01 |
| SLC2A6          | -1,03 | 4,94E-01 | 7,44E-01 |
| A_24_P600087    | 1,02  | 4,94E-01 | 7,44E-01 |
| OR10T2          | -1,03 | 4,94E-01 | 7,45E-01 |
| AK094424        | -1,02 | 4,94E-01 | 7,45E-01 |

|                        |       |          |          |
|------------------------|-------|----------|----------|
| <i>THC2344033</i>      | 1,14  | 4,94E-01 | 7,45E-01 |
| <i>ELOVL1</i>          | 1,03  | 4,95E-01 | 7,45E-01 |
| <i>OMP</i>             | 1,02  | 4,95E-01 | 7,45E-01 |
| <i>SRI</i>             | 1,02  | 4,95E-01 | 7,45E-01 |
| <i>A_32_P191717</i>    | 1,02  | 4,95E-01 | 7,45E-01 |
| <i>KRTAP9-4</i>        | 1,03  | 4,95E-01 | 7,45E-01 |
| <i>CR601458</i>        | 1,07  | 4,95E-01 | 7,45E-01 |
| <i>BC019241</i>        | 1,02  | 4,95E-01 | 7,45E-01 |
| <i>SCRN2</i>           | -1,04 | 4,95E-01 | 7,45E-01 |
| <i>AF085995</i>        | 1,02  | 4,95E-01 | 7,45E-01 |
| <i>ENST00000309024</i> | 1,03  | 4,95E-01 | 7,45E-01 |
| <i>GC</i>              | 1,03  | 4,95E-01 | 7,45E-01 |
| <i>AF272377</i>        | 1,03  | 4,95E-01 | 7,45E-01 |
| <i>KRTAP9-5</i>        | -1,03 | 4,95E-01 | 7,45E-01 |
| <i>IZUMO1</i>          | -1,03 | 4,95E-01 | 7,45E-01 |
| <i>SH2D3C</i>          | 1,05  | 4,95E-01 | 7,45E-01 |
| <i>A_24_P928862</i>    | 1,03  | 4,95E-01 | 7,45E-01 |
| <i>PRSS2</i>           | -1,09 | 4,95E-01 | 7,45E-01 |
| <i>SMYD1</i>           | -1,02 | 4,95E-01 | 7,45E-01 |
| <i>A_24_P632835</i>    | 1,03  | 4,95E-01 | 7,45E-01 |
| <i>CYB5R2</i>          | -1,06 | 4,95E-01 | 7,45E-01 |
| <i>ECE2</i>            | -1,03 | 4,95E-01 | 7,45E-01 |
| <i>FAHD2A</i>          | -1,02 | 4,95E-01 | 7,45E-01 |
| <i>SYK</i>             | -1,05 | 4,96E-01 | 7,45E-01 |
| <i>PRNP</i>            | 1,04  | 4,96E-01 | 7,45E-01 |
| <i>NUP54</i>           | -1,03 | 4,96E-01 | 7,45E-01 |
| <i>PJA2</i>            | -1,04 | 4,96E-01 | 7,45E-01 |
| <i>YPEL3</i>           | 1,07  | 4,96E-01 | 7,45E-01 |
| <i>C10orf95</i>        | -1,03 | 4,96E-01 | 7,45E-01 |
| <i>THC2313214</i>      | 1,04  | 4,96E-01 | 7,45E-01 |
| <i>ENST00000367620</i> | -1,03 | 4,96E-01 | 7,45E-01 |
| <i>C14orf173</i>       | 1,06  | 4,96E-01 | 7,45E-01 |
| <i>AA903587</i>        | 1,03  | 4,96E-01 | 7,45E-01 |
| <i>AF116666</i>        | -1,03 | 4,96E-01 | 7,46E-01 |
| <i>LOC199899</i>       | -1,05 | 4,96E-01 | 7,46E-01 |
| <i>CRTAC1</i>          | 1,12  | 4,96E-01 | 7,46E-01 |
| <i>THC2411070</i>      | 1,03  | 4,96E-01 | 7,46E-01 |
| <i>THC2360930</i>      | -1,02 | 4,97E-01 | 7,46E-01 |
| <i>DCP_22_9</i>        | 1,07  | 4,96E-01 | 7,46E-01 |
| <i>MXRA7</i>           | 1,03  | 4,97E-01 | 7,46E-01 |
| <i>WDR76</i>           | 1,02  | 4,97E-01 | 7,46E-01 |
| <i>ICT1</i>            | -1,03 | 4,97E-01 | 7,46E-01 |
| <i>DDX51</i>           | -1,02 | 4,97E-01 | 7,46E-01 |
| <i>C21orf34</i>        | 1,04  | 4,97E-01 | 7,46E-01 |

|                        |       |          |          |
|------------------------|-------|----------|----------|
| <i>KRT31</i>           | -1,15 | 4,97E-01 | 7,46E-01 |
| <i>THC2376245</i>      | -1,02 | 4,97E-01 | 7,46E-01 |
| <i>C2orf18</i>         | 1,03  | 4,97E-01 | 7,46E-01 |
| <i>DLGAP1</i>          | 1,03  | 4,97E-01 | 7,46E-01 |
| <i>A_24_P930905</i>    | 1,03  | 4,97E-01 | 7,46E-01 |
| <i>DLD</i>             | 1,04  | 4,97E-01 | 7,46E-01 |
| <i>EGF</i>             | 1,10  | 4,97E-01 | 7,46E-01 |
| <i>A_24_P298320</i>    | -1,02 | 4,97E-01 | 7,46E-01 |
| <i>LA16c-360B4.1</i>   | 1,03  | 4,97E-01 | 7,46E-01 |
| <i>AK128714</i>        | 1,05  | 4,97E-01 | 7,46E-01 |
| <i>BM989484</i>        | -1,03 | 4,97E-01 | 7,46E-01 |
| <i>EVI5</i>            | 1,02  | 4,97E-01 | 7,47E-01 |
| <i>C1orf167</i>        | 1,03  | 4,97E-01 | 7,47E-01 |
| <i>BE535679</i>        | 1,05  | 4,97E-01 | 7,47E-01 |
| <i>ENST00000355710</i> | -1,05 | 4,97E-01 | 7,47E-01 |
| <i>THC2448349</i>      | 1,05  | 4,97E-01 | 7,47E-01 |
| <i>CDH11</i>           | -1,04 | 4,97E-01 | 7,47E-01 |
| <i>THC2437517</i>      | -1,03 | 4,98E-01 | 7,47E-01 |
| <i>F13A1</i>           | -1,10 | 4,98E-01 | 7,47E-01 |
| <i>PLA2G4F</i>         | -1,04 | 4,98E-01 | 7,47E-01 |
| <i>CSAD</i>            | -1,03 | 4,98E-01 | 7,47E-01 |
| <i>THC2343241</i>      | -1,03 | 4,98E-01 | 7,47E-01 |
| <i>ENST00000303934</i> | 1,02  | 4,98E-01 | 7,47E-01 |
| <i>SNX16</i>           | 1,03  | 4,98E-01 | 7,47E-01 |
| <i>BE671182</i>        | -1,02 | 4,98E-01 | 7,47E-01 |
| <i>PKD1</i>            | 1,05  | 4,98E-01 | 7,47E-01 |
| <i>AK093036</i>        | -1,05 | 4,98E-01 | 7,47E-01 |
| <i>A_24_P916223</i>    | 1,02  | 4,98E-01 | 7,47E-01 |
| <i>HTR1A</i>           | 1,03  | 4,98E-01 | 7,47E-01 |
| <i>E1A_r60_n11</i>     | 1,15  | 4,98E-01 | 7,47E-01 |
| <i>THC2279364</i>      | -1,03 | 4,98E-01 | 7,47E-01 |
| <i>CR597822</i>        | -1,03 | 4,98E-01 | 7,47E-01 |
| <i>TRPV5</i>           | -1,03 | 4,98E-01 | 7,47E-01 |
| <i>MORG1</i>           | -1,02 | 4,98E-01 | 7,47E-01 |
| <i>THC2366161</i>      | -1,02 | 4,98E-01 | 7,47E-01 |
| <i>KLK2</i>            | -1,02 | 4,98E-01 | 7,47E-01 |
| <i>BE709763</i>        | 1,03  | 4,98E-01 | 7,47E-01 |
| <i>ENST00000357986</i> | 1,03  | 4,98E-01 | 7,47E-01 |
| <i>AW007825</i>        | 1,03  | 4,98E-01 | 7,47E-01 |
| <i>PDIA3</i>           | 1,04  | 4,98E-01 | 7,47E-01 |
| <i>NCF4</i>            | 1,05  | 4,98E-01 | 7,47E-01 |
| <i>DOK5</i>            | 1,05  | 4,98E-01 | 7,47E-01 |
| <i>NGFRAP1L1</i>       | 1,07  | 4,98E-01 | 7,47E-01 |
| <i>LOC283551</i>       | -1,03 | 4,98E-01 | 7,47E-01 |



|                        |       |          |          |
|------------------------|-------|----------|----------|
| <i>ENST00000372234</i> | 1,04  | 4,99E-01 | 7,47E-01 |
| <i>NR1D2</i>           | -1,09 | 4,99E-01 | 7,48E-01 |
| <i>LRRC39</i>          | 1,03  | 4,99E-01 | 7,48E-01 |
| <i>SLC38A5</i>         | 1,07  | 4,99E-01 | 7,48E-01 |
| <i>PRSS33</i>          | -1,02 | 4,99E-01 | 7,48E-01 |
| <i>METAP2</i>          | 1,02  | 4,99E-01 | 7,48E-01 |
| <i>RP5-875H10.1</i>    | -1,05 | 4,99E-01 | 7,48E-01 |
| <i>REG1B</i>           | 1,02  | 4,99E-01 | 7,48E-01 |
| <i>THC2437404</i>      | 1,02  | 4,99E-01 | 7,48E-01 |
| <i>ITIH2</i>           | 1,03  | 4,99E-01 | 7,48E-01 |
| <i>KIAA0087</i>        | 1,02  | 4,99E-01 | 7,48E-01 |
| <i>A_24_P350252</i>    | 1,05  | 4,99E-01 | 7,48E-01 |
| <i>STAP2</i>           | 1,05  | 4,99E-01 | 7,48E-01 |
| <i>THC2416213</i>      | -1,04 | 4,99E-01 | 7,48E-01 |
| <i>ZFYVE16</i>         | 1,03  | 4,99E-01 | 7,48E-01 |
| <i>HDAC7A</i>          | -1,03 | 4,99E-01 | 7,48E-01 |
| <i>C1R</i>             | -1,05 | 4,99E-01 | 7,48E-01 |
| <i>A_24_P932507</i>    | -1,05 | 4,99E-01 | 7,48E-01 |
| <i>CD4</i>             | 1,04  | 4,99E-01 | 7,48E-01 |
| <i>A_24_P913620</i>    | 1,06  | 4,99E-01 | 7,48E-01 |
| <i>TMPRSS9</i>         | -1,03 | 4,99E-01 | 7,48E-01 |
| <i>BC033057</i>        | -1,02 | 4,99E-01 | 7,48E-01 |
| <i>ENST00000379187</i> | 1,03  | 4,99E-01 | 7,48E-01 |
| <i>PTX3</i>            | -1,08 | 4,99E-01 | 7,48E-01 |
| <i>MYLK</i>            | -1,14 | 5,00E-01 | 7,48E-01 |
| <i>THC2411421</i>      | -1,04 | 5,00E-01 | 7,48E-01 |
| <i>AK124192</i>        | 1,04  | 5,00E-01 | 7,48E-01 |
| <i>EDN3</i>            | -1,12 | 5,00E-01 | 7,48E-01 |
| <i>BE814519</i>        | -1,03 | 5,00E-01 | 7,48E-01 |
| <i>PIGO</i>            | 1,02  | 5,00E-01 | 7,48E-01 |
| <i>A_24_P525144</i>    | 1,02  | 5,00E-01 | 7,48E-01 |
| <i>CCR8</i>            | 1,02  | 5,00E-01 | 7,48E-01 |
| <i>BX648958</i>        | 1,03  | 5,00E-01 | 7,48E-01 |
| <i>ENST00000301171</i> | -1,04 | 5,00E-01 | 7,48E-01 |
| <i>THC2447296</i>      | -1,03 | 5,00E-01 | 7,48E-01 |
| <i>IGFBP6</i>          | -1,06 | 5,00E-01 | 7,49E-01 |
| <i>CR611712</i>        | -1,04 | 5,00E-01 | 7,49E-01 |
| <i>L23852</i>          | 1,03  | 5,00E-01 | 7,49E-01 |
| <i>SAR1A</i>           | 1,03  | 5,00E-01 | 7,49E-01 |
| <i>CA14</i>            | 1,09  | 5,00E-01 | 7,49E-01 |
| <i>A_24_P204484</i>    | -1,03 | 5,00E-01 | 7,49E-01 |
| <i>PTDSS2</i>          | -1,04 | 5,00E-01 | 7,49E-01 |
| <i>BQ775944</i>        | 1,03  | 5,01E-01 | 7,49E-01 |
| <i>A_24_P58607</i>     | -1,05 | 5,01E-01 | 7,49E-01 |

|                 |       |          |          |
|-----------------|-------|----------|----------|
| AK092921        | -1,04 | 5,01E-01 | 7,49E-01 |
| NOD27           | -1,02 | 5,01E-01 | 7,49E-01 |
| MARCO           | -1,13 | 5,01E-01 | 7,49E-01 |
| A_32_P10187     | -1,03 | 5,01E-01 | 7,49E-01 |
| SPIRE2          | -1,03 | 5,01E-01 | 7,49E-01 |
| AL137325        | -1,03 | 5,01E-01 | 7,49E-01 |
| FEV             | 1,02  | 5,01E-01 | 7,49E-01 |
| AI751518        | 1,03  | 5,01E-01 | 7,49E-01 |
| THC2396619      | -1,03 | 5,01E-01 | 7,49E-01 |
| THC2405509      | 1,02  | 5,01E-01 | 7,49E-01 |
| WAPAL           | -1,02 | 5,01E-01 | 7,49E-01 |
| ATPAF2          | 1,03  | 5,01E-01 | 7,49E-01 |
| FAM89A          | -1,06 | 5,01E-01 | 7,50E-01 |
| LOC283143       | -1,04 | 5,01E-01 | 7,50E-01 |
| SPATA2          | -1,03 | 5,01E-01 | 7,50E-01 |
| ITPA            | -1,02 | 5,01E-01 | 7,50E-01 |
| DVL1            | 1,03  | 5,01E-01 | 7,50E-01 |
| BC019830        | 1,03  | 5,02E-01 | 7,50E-01 |
| AK027179        | 1,02  | 5,02E-01 | 7,50E-01 |
| FNBP1           | -1,07 | 5,02E-01 | 7,50E-01 |
| AF290544        | -1,03 | 5,02E-01 | 7,50E-01 |
| AK091555        | -1,03 | 5,02E-01 | 7,50E-01 |
| FBXO5           | 1,04  | 5,02E-01 | 7,50E-01 |
| DCBLD1          | 1,04  | 5,02E-01 | 7,50E-01 |
| HIST2H2AB       | 1,04  | 5,02E-01 | 7,50E-01 |
| BG777521        | 1,04  | 5,02E-01 | 7,50E-01 |
| LHFPL1          | -1,03 | 5,02E-01 | 7,50E-01 |
| ENST00000332168 | -1,02 | 5,02E-01 | 7,50E-01 |
| LOC149478       | 1,02  | 5,02E-01 | 7,50E-01 |
| THC2340114      | 1,02  | 5,02E-01 | 7,51E-01 |
| MIA             | 1,09  | 5,02E-01 | 7,51E-01 |
| THC2396592      | -1,03 | 5,03E-01 | 7,51E-01 |
| KIAA1913        | -1,06 | 5,03E-01 | 7,51E-01 |
| ENST00000262042 | -1,06 | 5,03E-01 | 7,51E-01 |
| LOC402562       | -1,05 | 5,03E-01 | 7,51E-01 |
| THC2281915      | -1,03 | 5,03E-01 | 7,51E-01 |
| MAPK8IP1        | 1,06  | 5,03E-01 | 7,51E-01 |
| THC2365212      | -1,05 | 5,03E-01 | 7,51E-01 |
| A_24_P384422    | -1,05 | 5,03E-01 | 7,51E-01 |
| PLP2            | 1,03  | 5,03E-01 | 7,51E-01 |
| THC2287438      | -1,03 | 5,03E-01 | 7,51E-01 |
| CCT4            | -1,03 | 5,03E-01 | 7,51E-01 |
| S53162          | -1,04 | 5,03E-01 | 7,51E-01 |
| ASGR2           | -1,04 | 5,03E-01 | 7,51E-01 |

|                        |       |          |          |
|------------------------|-------|----------|----------|
| <i>THC2316995</i>      | 1,02  | 5,03E-01 | 7,51E-01 |
| <i>BF364571</i>        | 1,03  | 5,03E-01 | 7,51E-01 |
| <i>EIF1B</i>           | 1,04  | 5,03E-01 | 7,51E-01 |
| <i>AF118066</i>        | -1,03 | 5,03E-01 | 7,51E-01 |
| <i>THC2286259</i>      | -1,05 | 5,03E-01 | 7,51E-01 |
| <i>SOX15</i>           | -1,03 | 5,04E-01 | 7,51E-01 |
| <i>A_24_P472655</i>    | 1,02  | 5,04E-01 | 7,51E-01 |
| <i>SDPR</i>            | 1,06  | 5,04E-01 | 7,51E-01 |
| <i>BAG2</i>            | 1,08  | 5,03E-01 | 7,51E-01 |
| <i>PLN</i>             | 1,11  | 5,04E-01 | 7,51E-01 |
| <i>MGC2848</i>         | 1,03  | 5,04E-01 | 7,52E-01 |
| <i>WDR71</i>           | -1,04 | 5,04E-01 | 7,52E-01 |
| <i>LOC441136</i>       | -1,03 | 5,04E-01 | 7,52E-01 |
| <i>BQ448507</i>        | 1,03  | 5,04E-01 | 7,52E-01 |
| <i>MASK-BP3</i>        | 1,03  | 5,04E-01 | 7,52E-01 |
| <i>BOLA3</i>           | 1,04  | 5,04E-01 | 7,52E-01 |
| <i>A_24_P187298</i>    | -1,02 | 5,04E-01 | 7,52E-01 |
| <i>TAC1</i>            | -1,05 | 5,04E-01 | 7,52E-01 |
| <i>CRTC2</i>           | -1,03 | 5,04E-01 | 7,52E-01 |
| <i>THC2440577</i>      | 1,03  | 5,04E-01 | 7,52E-01 |
| <i>NUP35</i>           | -1,03 | 5,04E-01 | 7,52E-01 |
| <i>CLCN4</i>           | 1,03  | 5,04E-01 | 7,52E-01 |
| <i>POF1B</i>           | -1,07 | 5,04E-01 | 7,52E-01 |
| <i>HYI</i>             | -1,03 | 5,04E-01 | 7,52E-01 |
| <i>ABO51438</i>        | 1,03  | 5,04E-01 | 7,52E-01 |
| <i>A_24_P410117</i>    | -1,08 | 5,04E-01 | 7,52E-01 |
| <i>A_24_P927583</i>    | 1,02  | 5,04E-01 | 7,52E-01 |
| <i>SIKE</i>            | 1,02  | 5,04E-01 | 7,52E-01 |
| <i>A_24_P828125</i>    | 1,05  | 5,04E-01 | 7,52E-01 |
| <i>A_24_P924968</i>    | -1,02 | 5,05E-01 | 7,52E-01 |
| <i>SLC29A2</i>         | 1,02  | 5,05E-01 | 7,52E-01 |
| <i>THC2314249</i>      | 1,03  | 5,05E-01 | 7,52E-01 |
| <i>A_23_P2180</i>      | 1,03  | 5,05E-01 | 7,52E-01 |
| <i>ENST00000227451</i> | -1,03 | 5,05E-01 | 7,52E-01 |
| <i>CST8</i>            | 1,03  | 5,05E-01 | 7,52E-01 |
| <i>NSUN3</i>           | -1,03 | 5,05E-01 | 7,52E-01 |
| <i>AT_P_5</i>          | 1,01  | 5,05E-01 | 7,52E-01 |
| <i>C8orf8</i>          | 1,02  | 5,05E-01 | 7,52E-01 |
| <i>PHF19</i>           | 1,03  | 5,05E-01 | 7,52E-01 |
| <i>A_24_P671842</i>    | 1,05  | 5,05E-01 | 7,52E-01 |
| <i>BRWD1</i>           | 1,03  | 5,05E-01 | 7,52E-01 |
| <i>MIG7</i>            | 1,04  | 5,05E-01 | 7,52E-01 |
| <i>ZNF35</i>           | 1,04  | 5,05E-01 | 7,52E-01 |
| <i>ENST00000371611</i> | -1,04 | 5,05E-01 | 7,52E-01 |

|                     |       |          |          |
|---------------------|-------|----------|----------|
| <i>A_24_P783656</i> | -1,04 | 5,05E-01 | 7,52E-01 |
| <i>C6orf58</i>      | -1,02 | 5,05E-01 | 7,52E-01 |
| <i>AK093002</i>     | 1,03  | 5,05E-01 | 7,52E-01 |
| <i>G36946</i>       | 1,03  | 5,05E-01 | 7,52E-01 |
| <i>SDHC</i>         | -1,03 | 5,05E-01 | 7,52E-01 |
| <i>BX112397</i>     | -1,03 | 5,05E-01 | 7,52E-01 |
| <i>HDDC2</i>        | -1,03 | 5,05E-01 | 7,52E-01 |
| <i>CYB5R3</i>       | 1,03  | 5,05E-01 | 7,52E-01 |
| <i>C8orf39</i>      | -1,03 | 5,05E-01 | 7,52E-01 |
| <i>THC2368209</i>   | 1,03  | 5,05E-01 | 7,52E-01 |
| <i>C1orf14</i>      | -1,03 | 5,05E-01 | 7,52E-01 |
| <i>A_24_P944945</i> | -1,03 | 5,05E-01 | 7,52E-01 |
| <i>THC2339675</i>   | 1,03  | 5,06E-01 | 7,53E-01 |
| <i>C12orf50</i>     | 1,03  | 5,06E-01 | 7,53E-01 |
| <i>GPHB5</i>        | 1,03  | 5,06E-01 | 7,53E-01 |
| <i>POU1F1</i>       | 1,03  | 5,06E-01 | 7,53E-01 |
| <i>UNC45A</i>       | 1,03  | 5,06E-01 | 7,53E-01 |
| <i>LSR</i>          | 1,03  | 5,06E-01 | 7,53E-01 |
| <i>FLJ40288</i>     | -1,02 | 5,06E-01 | 7,53E-01 |
| <i>BC064349</i>     | -1,03 | 5,06E-01 | 7,53E-01 |
| <i>CD82</i>         | 1,07  | 5,06E-01 | 7,53E-01 |
| <i>AK123157</i>     | -1,10 | 5,06E-01 | 7,53E-01 |
| <i>KIAA0310</i>     | -1,02 | 5,06E-01 | 7,53E-01 |
| <i>LSM4</i>         | -1,03 | 5,06E-01 | 7,53E-01 |
| <i>A_23_P4341</i>   | 1,03  | 5,06E-01 | 7,53E-01 |
| <i>A_24_P565898</i> | 1,05  | 5,06E-01 | 7,53E-01 |
| <i>A_24_P943507</i> | -1,03 | 5,06E-01 | 7,53E-01 |
| <i>THC2347643</i>   | 1,02  | 5,06E-01 | 7,53E-01 |
| <i>GPR175</i>       | 1,02  | 5,06E-01 | 7,53E-01 |
| <i>FRAG1</i>        | -1,02 | 5,06E-01 | 7,53E-01 |
| <i>AK057116</i>     | -1,03 | 5,06E-01 | 7,53E-01 |
| <i>AK000992</i>     | 1,04  | 5,06E-01 | 7,53E-01 |
| <i>AK002210</i>     | 1,02  | 5,07E-01 | 7,54E-01 |
| <i>CRHR1</i>        | -1,03 | 5,07E-01 | 7,54E-01 |
| <i>AA468898</i>     | -1,02 | 5,07E-01 | 7,54E-01 |
| <i>FCRL2</i>        | -1,02 | 5,07E-01 | 7,54E-01 |
| <i>HIF3A</i>        | -1,07 | 5,07E-01 | 7,54E-01 |
| <i>LAMC3</i>        | -1,07 | 5,07E-01 | 7,54E-01 |
| <i>PPP3CA</i>       | 1,04  | 5,07E-01 | 7,54E-01 |
| <i>FLJ23191</i>     | -1,07 | 5,07E-01 | 7,54E-01 |
| <i>AA417913</i>     | 1,05  | 5,07E-01 | 7,54E-01 |
| <i>THC2348599</i>   | -1,03 | 5,07E-01 | 7,54E-01 |
| <i>AF090907</i>     | -1,02 | 5,07E-01 | 7,54E-01 |
| <i>FLJ46111</i>     | 1,02  | 5,07E-01 | 7,54E-01 |

|                        |       |          |          |
|------------------------|-------|----------|----------|
| <i>BC029452</i>        | 1,02  | 5,07E-01 | 7,54E-01 |
| <i>GP1BB</i>           | 1,07  | 5,07E-01 | 7,54E-01 |
| <i>KLK9</i>            | 1,02  | 5,07E-01 | 7,54E-01 |
| <i>EDG4</i>            | -1,03 | 5,07E-01 | 7,54E-01 |
| <i>A_24_P919265</i>    | -1,03 | 5,07E-01 | 7,54E-01 |
| <i>HIST1H1C</i>        | 1,06  | 5,08E-01 | 7,54E-01 |
| <i>OR5P2</i>           | -1,03 | 5,08E-01 | 7,54E-01 |
| <i>TBCD</i>            | -1,02 | 5,08E-01 | 7,54E-01 |
| <i>ACBD4</i>           | 1,03  | 5,08E-01 | 7,54E-01 |
| <i>MGC10955</i>        | 1,03  | 5,08E-01 | 7,54E-01 |
| <i>ENST00000361200</i> | 1,09  | 5,08E-01 | 7,54E-01 |
| <i>A_24_P878366</i>    | -1,03 | 5,08E-01 | 7,54E-01 |
| <i>CORO2A</i>          | -1,05 | 5,08E-01 | 7,55E-01 |
| <i>THC2357654</i>      | 1,03  | 5,08E-01 | 7,55E-01 |
| <i>A_24_P928830</i>    | -1,03 | 5,08E-01 | 7,55E-01 |
| <i>CILP2</i>           | 1,02  | 5,08E-01 | 7,55E-01 |
| <i>MUSK</i>            | 1,02  | 5,08E-01 | 7,55E-01 |
| <i>MAPK6</i>           | 1,03  | 5,08E-01 | 7,55E-01 |
| <i>BC030605</i>        | 1,10  | 5,08E-01 | 7,55E-01 |
| <i>A_24_P195510</i>    | -1,06 | 5,08E-01 | 7,55E-01 |
| <i>AL541613</i>        | -1,03 | 5,08E-01 | 7,55E-01 |
| <i>DB360728</i>        | 1,03  | 5,08E-01 | 7,55E-01 |
| <i>DKFZp761B107</i>    | -1,02 | 5,09E-01 | 7,55E-01 |
| <i>CBLL1</i>           | -1,03 | 5,09E-01 | 7,55E-01 |
| <i>ENST00000378954</i> | -1,04 | 5,09E-01 | 7,55E-01 |
| <i>TMEM77</i>          | -1,04 | 5,09E-01 | 7,55E-01 |
| <i>ENST00000380487</i> | -1,03 | 5,09E-01 | 7,55E-01 |
| <i>GPR55</i>           | -1,03 | 5,09E-01 | 7,55E-01 |
| <i>IFNW1</i>           | -1,02 | 5,09E-01 | 7,55E-01 |
| <i>THC2400593</i>      | 1,03  | 5,09E-01 | 7,55E-01 |
| <i>KIAA1586</i>        | 1,03  | 5,09E-01 | 7,55E-01 |
| <i>EIF2AK4</i>         | 1,03  | 5,09E-01 | 7,55E-01 |
| <i>A_24_P324284</i>    | 1,06  | 5,09E-01 | 7,55E-01 |
| <i>LOC647322</i>       | 1,08  | 5,09E-01 | 7,55E-01 |
| <i>A_24_P913855</i>    | 1,05  | 5,09E-01 | 7,55E-01 |
| <i>DEPDC4</i>          | -1,05 | 5,09E-01 | 7,55E-01 |
| <i>THC2342936</i>      | -1,03 | 5,09E-01 | 7,55E-01 |
| <i>A_24_P857932</i>    | -1,03 | 5,09E-01 | 7,55E-01 |
| <i>FLJ32011</i>        | 1,02  | 5,09E-01 | 7,55E-01 |
| <i>AK092445</i>        | 1,04  | 5,09E-01 | 7,55E-01 |
| <i>ANKRD53</i>         | 1,02  | 5,09E-01 | 7,55E-01 |
| <i>DKK1</i>            | 1,26  | 5,09E-01 | 7,56E-01 |
| <i>FLJ39005</i>        | -1,02 | 5,09E-01 | 7,56E-01 |
| <i>A_32_P212903</i>    | -1,02 | 5,09E-01 | 7,56E-01 |

|                        |       |          |          |
|------------------------|-------|----------|----------|
| <i>THC2336404</i>      | -1,03 | 5,09E-01 | 7,56E-01 |
| <i>ZNF251</i>          | -1,03 | 5,10E-01 | 7,56E-01 |
| <i>ZNF638</i>          | 1,02  | 5,10E-01 | 7,56E-01 |
| <i>INTS2</i>           | -1,03 | 5,10E-01 | 7,56E-01 |
| <i>GPR146</i>          | -1,05 | 5,10E-01 | 7,56E-01 |
| <i>C9orf138</i>        | 1,03  | 5,10E-01 | 7,56E-01 |
| <i>BE830535</i>        | 1,03  | 5,10E-01 | 7,56E-01 |
| <i>GMNN</i>            | 1,04  | 5,10E-01 | 7,56E-01 |
| <i>HTR4</i>            | 1,05  | 5,10E-01 | 7,56E-01 |
| <i>PRSS3</i>           | -1,07 | 5,10E-01 | 7,56E-01 |
| <i>LOC401152</i>       | -1,03 | 5,10E-01 | 7,56E-01 |
| <i>THC2243055</i>      | -1,02 | 5,10E-01 | 7,56E-01 |
| <i>LOC388381</i>       | -1,02 | 5,10E-01 | 7,56E-01 |
| <i>X58747</i>          | 1,02  | 5,10E-01 | 7,56E-01 |
| <i>THC2380758</i>      | 1,03  | 5,10E-01 | 7,56E-01 |
| <i>GTF2F2</i>          | 1,03  | 5,10E-01 | 7,56E-01 |
| <i>M-RIP</i>           | 1,04  | 5,10E-01 | 7,56E-01 |
| <i>ENST00000287899</i> | 1,03  | 5,10E-01 | 7,56E-01 |
| <i>AF085846</i>        | -1,03 | 5,10E-01 | 7,56E-01 |
| <i>TSC22D3</i>         | 1,07  | 5,10E-01 | 7,56E-01 |
| <i>C19orf9</i>         | -1,04 | 5,10E-01 | 7,56E-01 |
| <i>SUSD1</i>           | -1,05 | 5,10E-01 | 7,56E-01 |
| <i>GDA</i>             | 1,03  | 5,10E-01 | 7,56E-01 |
| <i>R07642</i>          | 1,02  | 5,11E-01 | 7,57E-01 |
| <i>CADPS2</i>          | -1,12 | 5,11E-01 | 7,57E-01 |
| <i>THC2265157</i>      | 1,02  | 5,11E-01 | 7,57E-01 |
| <i>AF320070</i>        | -1,03 | 5,11E-01 | 7,57E-01 |
| <i>AI458424</i>        | -1,03 | 5,11E-01 | 7,57E-01 |
| <i>IL26</i>            | 1,03  | 5,11E-01 | 7,57E-01 |
| <i>MVD</i>             | 1,03  | 5,11E-01 | 7,57E-01 |
| <i>ENST00000366848</i> | 1,04  | 5,11E-01 | 7,57E-01 |
| <i>ENST00000313350</i> | -1,03 | 5,11E-01 | 7,57E-01 |
| <i>A_32_P41203</i>     | 1,03  | 5,11E-01 | 7,57E-01 |
| <i>TIMM10</i>          | 1,04  | 5,11E-01 | 7,57E-01 |
| <i>ENST00000310176</i> | 1,03  | 5,11E-01 | 7,57E-01 |
| <i>IFIT3</i>           | 1,06  | 5,11E-01 | 7,57E-01 |
| <i>MGC88374</i>        | 1,02  | 5,11E-01 | 7,57E-01 |
| <i>A_32_P88605</i>     | 1,05  | 5,11E-01 | 7,57E-01 |
| <i>USP31</i>           | 1,06  | 5,11E-01 | 7,57E-01 |
| <i>DKFZp434N035</i>    | 1,04  | 5,11E-01 | 7,57E-01 |
| <i>DISC1</i>           | -1,04 | 5,12E-01 | 7,58E-01 |
| <i>Z28739</i>          | 1,03  | 5,12E-01 | 7,58E-01 |
| <i>A_23_P28514</i>     | -1,02 | 5,12E-01 | 7,58E-01 |
| <i>PORCN</i>           | -1,02 | 5,12E-01 | 7,58E-01 |

|                     |       |          |          |
|---------------------|-------|----------|----------|
| <i>A_24_P238316</i> | -1,02 | 5,12E-01 | 7,58E-01 |
| <i>THC2339839</i>   | 1,02  | 5,12E-01 | 7,58E-01 |
| <i>FLJ23834</i>     | -1,04 | 5,12E-01 | 7,58E-01 |
| <i>AKAP3</i>        | -1,03 | 5,12E-01 | 7,58E-01 |
| <i>PCDHB1</i>       | 1,02  | 5,12E-01 | 7,58E-01 |
| <i>LOC647254</i>    | 1,06  | 5,12E-01 | 7,58E-01 |
| <i>A_24_P7021</i>   | -1,03 | 5,12E-01 | 7,58E-01 |
| <i>DNAJB11</i>      | 1,04  | 5,12E-01 | 7,58E-01 |
| <i>C9orf5</i>       | -1,04 | 5,12E-01 | 7,58E-01 |
| <i>BI496440</i>     | 1,02  | 5,12E-01 | 7,58E-01 |
| <i>NEURL2</i>       | -1,04 | 5,12E-01 | 7,58E-01 |
| <i>CD14</i>         | -1,06 | 5,12E-01 | 7,58E-01 |
| <i>THC2442939</i>   | 1,03  | 5,12E-01 | 7,58E-01 |
| <i>A_24_P913249</i> | 1,03  | 5,12E-01 | 7,58E-01 |
| <i>PHF10</i>        | 1,04  | 5,12E-01 | 7,58E-01 |
| <i>AF334588</i>     | -1,05 | 5,13E-01 | 7,58E-01 |
| <i>NCKAP1</i>       | -1,03 | 5,13E-01 | 7,58E-01 |
| <i>NLN</i>          | -1,03 | 5,13E-01 | 7,58E-01 |
| <i>WDR20</i>        | -1,02 | 5,13E-01 | 7,58E-01 |
| <i>BC007399</i>     | 1,02  | 5,13E-01 | 7,58E-01 |
| <i>FBS1</i>         | 1,02  | 5,13E-01 | 7,58E-01 |
| <i>PTPRA</i>        | 1,02  | 5,13E-01 | 7,58E-01 |
| <i>GAL3ST3</i>      | 1,04  | 5,13E-01 | 7,58E-01 |
| <i>CCDC109A</i>     | 1,02  | 5,13E-01 | 7,58E-01 |
| <i>TPM2</i>         | 1,12  | 5,13E-01 | 7,59E-01 |
| <i>RBM15</i>        | -1,04 | 5,13E-01 | 7,59E-01 |
| <i>MTNR1B</i>       | 1,02  | 5,13E-01 | 7,59E-01 |
| <i>A_32_P208533</i> | -1,04 | 5,13E-01 | 7,59E-01 |
| <i>MFSD4</i>        | 1,03  | 5,13E-01 | 7,59E-01 |
| <i>AA293788</i>     | 1,02  | 5,14E-01 | 7,59E-01 |
| <i>GLOXD1</i>       | -1,04 | 5,14E-01 | 7,59E-01 |
| <i>AF119893</i>     | -1,03 | 5,14E-01 | 7,59E-01 |
| <i>ZSCAN2</i>       | -1,02 | 5,14E-01 | 7,59E-01 |
| <i>C16orf73</i>     | 1,04  | 5,14E-01 | 7,59E-01 |
| <i>A_24_P417751</i> | 1,03  | 5,14E-01 | 7,59E-01 |
| <i>CUEDC1</i>       | 1,04  | 5,14E-01 | 7,60E-01 |
| <i>AL039916</i>     | -1,02 | 5,14E-01 | 7,60E-01 |
| <i>NPC1</i>         | 1,03  | 5,14E-01 | 7,60E-01 |
| <i>BX394228</i>     | 1,03  | 5,14E-01 | 7,60E-01 |
| <i>LOC646917</i>    | 1,03  | 5,14E-01 | 7,60E-01 |
| <i>BTBD2</i>        | -1,02 | 5,14E-01 | 7,60E-01 |
| <i>ANKRD7</i>       | 1,02  | 5,14E-01 | 7,60E-01 |
| <i>THC2305303</i>   | -1,07 | 5,14E-01 | 7,60E-01 |
| <i>GALNT14</i>      | -1,06 | 5,14E-01 | 7,60E-01 |

|                        |       |          |          |
|------------------------|-------|----------|----------|
| <i>OGFOD1</i>          | -1,04 | 5,14E-01 | 7,60E-01 |
| <i>C11orf47</i>        | -1,02 | 5,14E-01 | 7,60E-01 |
| <i>BF195775</i>        | -1,02 | 5,14E-01 | 7,60E-01 |
| <i>LOC492303</i>       | -1,02 | 5,14E-01 | 7,60E-01 |
| <i>BPY2B</i>           | 1,02  | 5,14E-01 | 7,60E-01 |
| <i>CAMLG</i>           | 1,04  | 5,14E-01 | 7,60E-01 |
| <i>CALML3</i>          | 1,05  | 5,14E-01 | 7,60E-01 |
| <i>ENST00000343756</i> | 1,05  | 5,14E-01 | 7,60E-01 |
| <i>CYP26B1</i>         | -1,16 | 5,15E-01 | 7,60E-01 |
| <i>AF074986</i>        | -1,05 | 5,15E-01 | 7,60E-01 |
| <i>BX449754</i>        | -1,04 | 5,15E-01 | 7,60E-01 |
| <i>DNAJC5B</i>         | -1,02 | 5,15E-01 | 7,60E-01 |
| <i>ITFG1</i>           | 1,02  | 5,15E-01 | 7,60E-01 |
| <i>A_24_P187154</i>    | 1,04  | 5,15E-01 | 7,60E-01 |
| <i>ATAD4</i>           | -1,04 | 5,15E-01 | 7,60E-01 |
| <i>CD99L2</i>          | -1,03 | 5,15E-01 | 7,60E-01 |
| <i>CHAF1A</i>          | -1,03 | 5,15E-01 | 7,60E-01 |
| <i>ILKAP</i>           | 1,02  | 5,15E-01 | 7,60E-01 |
| <i>LYZL4</i>           | 1,02  | 5,15E-01 | 7,60E-01 |
| <i>BC018589</i>        | 1,03  | 5,15E-01 | 7,60E-01 |
| <i>CENPL</i>           | 1,02  | 5,15E-01 | 7,60E-01 |
| <i>ACPP</i>            | -1,07 | 5,15E-01 | 7,60E-01 |
| <i>SHE</i>             | -1,04 | 5,15E-01 | 7,60E-01 |
| <i>LOC130074</i>       | -1,03 | 5,15E-01 | 7,60E-01 |
| <i>A_32_P139420</i>    | -1,03 | 5,15E-01 | 7,60E-01 |
| <i>AI049913</i>        | 1,02  | 5,15E-01 | 7,60E-01 |
| <i>APOB48R</i>         | -1,05 | 5,15E-01 | 7,60E-01 |
| <i>BE702235</i>        | -1,02 | 5,15E-01 | 7,60E-01 |
| <i>ENST00000272643</i> | 1,04  | 5,15E-01 | 7,60E-01 |
| <i>BF112104</i>        | -1,03 | 5,15E-01 | 7,60E-01 |
| <i>CRNN</i>            | -1,39 | 5,15E-01 | 7,60E-01 |
| <i>SFRS2</i>           | -1,03 | 5,15E-01 | 7,60E-01 |
| <i>A_24_P806076</i>    | 1,03  | 5,15E-01 | 7,60E-01 |
| <i>A_32_P96085</i>     | 1,03  | 5,16E-01 | 7,60E-01 |
| <i>AK023472</i>        | 1,03  | 5,15E-01 | 7,60E-01 |
| <i>A_24_P937936</i>    | 1,03  | 5,16E-01 | 7,60E-01 |
| <i>C16orf24</i>        | 1,03  | 5,15E-01 | 7,60E-01 |
| <i>AI264747</i>        | 1,03  | 5,16E-01 | 7,60E-01 |
| <i>BC030992</i>        | 1,05  | 5,15E-01 | 7,60E-01 |
| <i>THC2318474</i>      | 1,10  | 5,15E-01 | 7,60E-01 |
| <i>CR604908</i>        | -1,03 | 5,16E-01 | 7,60E-01 |
| <i>RAXLX</i>           | 1,03  | 5,16E-01 | 7,60E-01 |
| <i>NEO1</i>            | -1,05 | 5,16E-01 | 7,61E-01 |
| <i>THC2364893</i>      | 1,04  | 5,16E-01 | 7,61E-01 |



|                        |       |          |          |
|------------------------|-------|----------|----------|
| <i>NUDT3</i>           | -1,03 | 5,16E-01 | 7,61E-01 |
| <i>GLI2</i>            | -1,04 | 5,16E-01 | 7,61E-01 |
| <i>AK002187</i>        | -1,03 | 5,16E-01 | 7,61E-01 |
| <i>NP110187</i>        | 1,02  | 5,16E-01 | 7,61E-01 |
| <i>POLR2H</i>          | 1,02  | 5,16E-01 | 7,61E-01 |
| <i>LELP1</i>           | 1,02  | 5,16E-01 | 7,61E-01 |
| <i>BIN1</i>            | 1,03  | 5,16E-01 | 7,61E-01 |
| <i>A_24_P714984</i>    | -1,03 | 5,16E-01 | 7,61E-01 |
| <i>VPS52</i>           | -1,03 | 5,16E-01 | 7,61E-01 |
| <i>A_24_P767901</i>    | 1,04  | 5,16E-01 | 7,61E-01 |
| <i>TDRD5</i>           | 1,02  | 5,17E-01 | 7,61E-01 |
| <i>FLJ90231</i>        | -1,07 | 5,17E-01 | 7,61E-01 |
| <i>ENST00000331306</i> | -1,04 | 5,17E-01 | 7,61E-01 |
| <i>RDM1</i>            | -1,05 | 5,17E-01 | 7,61E-01 |
| <i>ENST00000379108</i> | -1,03 | 5,17E-01 | 7,61E-01 |
| <i>THC2437757</i>      | -1,06 | 5,17E-01 | 7,61E-01 |
| <i>THC2275057</i>      | -1,04 | 5,17E-01 | 7,62E-01 |
| <i>KIAA1909</i>        | -1,03 | 5,17E-01 | 7,62E-01 |
| <i>C14orf37</i>        | -1,03 | 5,17E-01 | 7,62E-01 |
| <i>THC2282028</i>      | -1,02 | 5,17E-01 | 7,62E-01 |
| <i>FGF11</i>           | 1,02  | 5,17E-01 | 7,62E-01 |
| <i>SAA3P</i>           | 1,03  | 5,17E-01 | 7,62E-01 |
| <i>AK124684</i>        | 1,02  | 5,17E-01 | 7,62E-01 |
| <i>RRAGD</i>           | 1,04  | 5,17E-01 | 7,62E-01 |
| <i>HSD17B8</i>         | 1,04  | 5,17E-01 | 7,62E-01 |
| <i>AGPAT7</i>          | -1,04 | 5,17E-01 | 7,62E-01 |
| <i>HSD17B12</i>        | 1,02  | 5,17E-01 | 7,62E-01 |
| <i>KRT3</i>            | -1,04 | 5,17E-01 | 7,62E-01 |
| <i>IL1RAPL2</i>        | 1,02  | 5,17E-01 | 7,62E-01 |
| <i>A_24_P238769</i>    | 1,04  | 5,17E-01 | 7,62E-01 |
| <i>RFX2</i>            | 1,08  | 5,17E-01 | 7,62E-01 |
| <i>LOC285401</i>       | -1,03 | 5,18E-01 | 7,62E-01 |
| <i>BQ014459</i>        | -1,04 | 5,18E-01 | 7,62E-01 |
| <i>THC2449829</i>      | -1,04 | 5,18E-01 | 7,62E-01 |
| <i>THC2288392</i>      | 1,04  | 5,18E-01 | 7,62E-01 |
| <i>THC2373524</i>      | 1,16  | 5,18E-01 | 7,62E-01 |
| <i>AGPAT2</i>          | 1,03  | 5,18E-01 | 7,62E-01 |
| <i>IPO13</i>           | -1,04 | 5,18E-01 | 7,62E-01 |
| <i>A_24_P357933</i>    | -1,04 | 5,18E-01 | 7,62E-01 |
| <i>LCMT2</i>           | -1,04 | 5,18E-01 | 7,62E-01 |
| <i>CXorf42</i>         | 1,03  | 5,18E-01 | 7,62E-01 |
| <i>BASP1</i>           | 1,08  | 5,18E-01 | 7,62E-01 |
| <i>C15orf50</i>        | -1,02 | 5,18E-01 | 7,62E-01 |
| <i>ENST00000262969</i> | 1,02  | 5,18E-01 | 7,62E-01 |

|                        |       |          |          |
|------------------------|-------|----------|----------|
| <i>ENST00000339867</i> | -1,03 | 5,18E-01 | 7,62E-01 |
| <i>AL133089</i>        | -1,02 | 5,18E-01 | 7,62E-01 |
| <i>A_23_P360114</i>    | 1,02  | 5,18E-01 | 7,62E-01 |
| <i>TMEM122</i>         | 1,03  | 5,18E-01 | 7,62E-01 |
| <i>LOC256021</i>       | 1,03  | 5,18E-01 | 7,62E-01 |
| <i>BC069815</i>        | 1,03  | 5,19E-01 | 7,63E-01 |
| <i>NPBWR1</i>          | 1,06  | 5,19E-01 | 7,63E-01 |
| <i>ANKRD19</i>         | -1,02 | 5,19E-01 | 7,63E-01 |
| <i>KIAA1853</i>        | -1,03 | 5,19E-01 | 7,63E-01 |
| <i>LRRC31</i>          | -1,02 | 5,19E-01 | 7,63E-01 |
| <i>CUTL2</i>           | -1,02 | 5,19E-01 | 7,63E-01 |
| <i>THC2253738</i>      | 1,02  | 5,19E-01 | 7,63E-01 |
| <i>THC2361883</i>      | 1,03  | 5,19E-01 | 7,63E-01 |
| <i>BC035518</i>        | 1,03  | 5,19E-01 | 7,63E-01 |
| <i>JMJD4</i>           | 1,03  | 5,19E-01 | 7,63E-01 |
| <i>OR4X2</i>           | 1,03  | 5,19E-01 | 7,63E-01 |
| <i>A_24_P170186</i>    | -1,08 | 5,19E-01 | 7,63E-01 |
| <i>NALP10</i>          | -1,04 | 5,19E-01 | 7,63E-01 |
| <i>MKNK2</i>           | -1,03 | 5,19E-01 | 7,63E-01 |
| <i>MBOAT4</i>          | -1,03 | 5,19E-01 | 7,63E-01 |
| <i>LOC554235</i>       | -1,03 | 5,19E-01 | 7,63E-01 |
| <i>A_24_P247014</i>    | 1,02  | 5,19E-01 | 7,63E-01 |
| <i>U1SNRNPBP</i>       | 1,02  | 5,19E-01 | 7,63E-01 |
| <i>ENST00000221315</i> | 1,03  | 5,19E-01 | 7,63E-01 |
| <i>ABCG5</i>           | 1,03  | 5,19E-01 | 7,63E-01 |
| <i>KBTBD8</i>          | 1,03  | 5,19E-01 | 7,63E-01 |
| <i>CILP</i>            | 1,10  | 5,19E-01 | 7,63E-01 |
| <i>EHF</i>             | -1,13 | 5,19E-01 | 7,63E-01 |
| <i>AA527731</i>        | 1,02  | 5,20E-01 | 7,63E-01 |
| <i>SEMA6C</i>          | 1,04  | 5,20E-01 | 7,63E-01 |
| <i>ENST00000370871</i> | 1,04  | 5,20E-01 | 7,63E-01 |
| <i>ENST00000307499</i> | 1,03  | 5,20E-01 | 7,63E-01 |
| <i>SSX4</i>            | 1,06  | 5,20E-01 | 7,63E-01 |
| <i>HRH4</i>            | 1,03  | 5,20E-01 | 7,64E-01 |
| <i>FER1L4</i>          | 1,04  | 5,20E-01 | 7,64E-01 |
| <i>XRN2</i>            | 1,03  | 5,20E-01 | 7,64E-01 |
| <i>THC2427266</i>      | -1,05 | 5,20E-01 | 7,64E-01 |
| <i>LOC284112</i>       | -1,04 | 5,20E-01 | 7,64E-01 |
| <i>ENST00000277860</i> | -1,03 | 5,20E-01 | 7,64E-01 |
| <i>SLC27A5</i>         | 1,03  | 5,20E-01 | 7,64E-01 |
| <i>C6orf112</i>        | -1,04 | 5,20E-01 | 7,64E-01 |
| <i>THC2305108</i>      | -1,04 | 5,20E-01 | 7,64E-01 |
| <i>THC2328951</i>      | -1,03 | 5,20E-01 | 7,64E-01 |
| <i>A_32_P47166</i>     | 1,19  | 5,20E-01 | 7,64E-01 |

|                 |       |          |          |
|-----------------|-------|----------|----------|
| THC2267890      | -1,04 | 5,20E-01 | 7,64E-01 |
| THC2277195      | -1,03 | 5,20E-01 | 7,64E-01 |
| IKBKE           | -1,02 | 5,20E-01 | 7,64E-01 |
| BC031977        | -1,02 | 5,20E-01 | 7,64E-01 |
| THC2318443      | -1,03 | 5,21E-01 | 7,64E-01 |
| CEBPA           | 1,06  | 5,21E-01 | 7,64E-01 |
| CHAD            | 1,03  | 5,21E-01 | 7,64E-01 |
| WBP2NL          | -1,03 | 5,21E-01 | 7,64E-01 |
| JMJD2A          | -1,02 | 5,21E-01 | 7,64E-01 |
| LOC644701       | 1,04  | 5,21E-01 | 7,64E-01 |
| SCAMP2          | 1,02  | 5,21E-01 | 7,64E-01 |
| WDR36           | -1,02 | 5,21E-01 | 7,65E-01 |
| BMP15           | 1,02  | 5,21E-01 | 7,65E-01 |
| AK000422        | 1,02  | 5,21E-01 | 7,65E-01 |
| AK058115        | 1,03  | 5,21E-01 | 7,65E-01 |
| AI537201        | 1,07  | 5,21E-01 | 7,65E-01 |
| A_24_P930070    | -1,02 | 5,21E-01 | 7,65E-01 |
| CYP2F1          | -1,02 | 5,21E-01 | 7,65E-01 |
| LQK1            | -1,06 | 5,22E-01 | 7,65E-01 |
| HCG4            | -1,03 | 5,22E-01 | 7,65E-01 |
| A_24_P917530    | -1,02 | 5,22E-01 | 7,65E-01 |
| SLC22A11        | -1,02 | 5,22E-01 | 7,65E-01 |
| ULBP3           | 1,03  | 5,22E-01 | 7,65E-01 |
| PPP2R3B         | 1,03  | 5,22E-01 | 7,65E-01 |
| A_24_P341731    | 1,03  | 5,22E-01 | 7,65E-01 |
| TXNL2           | 1,03  | 5,22E-01 | 7,65E-01 |
| PRKCH           | 1,04  | 5,22E-01 | 7,65E-01 |
| ERCC2           | 1,02  | 5,22E-01 | 7,66E-01 |
| WDR63           | 1,05  | 5,22E-01 | 7,66E-01 |
| TNNC2           | 1,05  | 5,22E-01 | 7,66E-01 |
| ENST00000372871 | -1,02 | 5,22E-01 | 7,66E-01 |
| TPD52L1         | -1,04 | 5,22E-01 | 7,66E-01 |
| AK024238        | 1,04  | 5,22E-01 | 7,66E-01 |
| AA807824        | 1,04  | 5,22E-01 | 7,66E-01 |
| A_24_P289865    | 1,04  | 5,22E-01 | 7,66E-01 |
| AI873271        | -1,03 | 5,23E-01 | 7,66E-01 |
| PRM2            | 1,02  | 5,23E-01 | 7,66E-01 |
| VWCE            | 1,09  | 5,23E-01 | 7,66E-01 |
| THC2363378      | 1,04  | 5,23E-01 | 7,66E-01 |
| FMO3            | 1,05  | 5,23E-01 | 7,66E-01 |
| A_32_P186382    | 1,02  | 5,23E-01 | 7,66E-01 |
| REGL            | 1,02  | 5,23E-01 | 7,66E-01 |
| ELAVL2          | 1,03  | 5,23E-01 | 7,66E-01 |
| TP53TG3         | -1,03 | 5,23E-01 | 7,66E-01 |

|                        |       |          |          |
|------------------------|-------|----------|----------|
| <i>F10112</i>          | -1,03 | 5,23E-01 | 7,66E-01 |
| <i>ABHD11</i>          | -1,02 | 5,23E-01 | 7,66E-01 |
| <i>CYP8B1</i>          | -1,02 | 5,23E-01 | 7,66E-01 |
| <i>AK000901</i>        | 1,04  | 5,23E-01 | 7,66E-01 |
| <i>ZDHHC18</i>         | 1,02  | 5,23E-01 | 7,66E-01 |
| <i>LOC440396</i>       | -1,08 | 5,23E-01 | 7,67E-01 |
| <i>FAM96B</i>          | 1,02  | 5,23E-01 | 7,67E-01 |
| <i>IGF2BP2</i>         | 1,04  | 5,23E-01 | 7,67E-01 |
| <i>WDR43</i>           | -1,03 | 5,23E-01 | 7,67E-01 |
| <i>A_24_P204015</i>    | -1,03 | 5,23E-01 | 7,67E-01 |
| <i>POLR2A</i>          | 1,02  | 5,23E-01 | 7,67E-01 |
| <i>BC028842</i>        | 1,02  | 5,24E-01 | 7,67E-01 |
| <i>A_32_P54260</i>     | 1,02  | 5,24E-01 | 7,67E-01 |
| <i>A_24_P925455</i>    | 1,03  | 5,24E-01 | 7,67E-01 |
| <i>CBX6</i>            | 1,06  | 5,24E-01 | 7,67E-01 |
| <i>AK094938</i>        | 1,02  | 5,24E-01 | 7,67E-01 |
| <i>BX647792</i>        | 1,04  | 5,24E-01 | 7,67E-01 |
| <i>A_24_P921771</i>    | -1,03 | 5,24E-01 | 7,67E-01 |
| <i>A_23_P118195</i>    | 1,02  | 5,24E-01 | 7,67E-01 |
| <i>AK001164</i>        | 1,03  | 5,24E-01 | 7,67E-01 |
| <i>HBM</i>             | 1,09  | 5,24E-01 | 7,67E-01 |
| <i>THC2424993</i>      | -1,03 | 5,24E-01 | 7,67E-01 |
| <i>CLNS1A</i>          | -1,02 | 5,24E-01 | 7,67E-01 |
| <i>ENST00000342324</i> | 1,06  | 5,24E-01 | 7,67E-01 |
| <i>FLJ11710</i>        | -1,04 | 5,24E-01 | 7,67E-01 |
| <i>STRC</i>            | -1,03 | 5,24E-01 | 7,67E-01 |
| <i>FDFT1</i>           | -1,03 | 5,24E-01 | 7,67E-01 |
| <i>DMWD</i>            | 1,03  | 5,24E-01 | 7,67E-01 |
| <i>AW874684</i>        | 1,03  | 5,24E-01 | 7,67E-01 |
| <i>AK126019</i>        | -1,05 | 5,24E-01 | 7,67E-01 |
| <i>THC2351769</i>      | -1,02 | 5,24E-01 | 7,67E-01 |
| <i>PRG3</i>            | 1,03  | 5,24E-01 | 7,67E-01 |
| <i>ENST00000269336</i> | -1,05 | 5,24E-01 | 7,67E-01 |
| <i>FXVD1</i>           | -1,04 | 5,24E-01 | 7,67E-01 |
| <i>LOC153328</i>       | -1,03 | 5,24E-01 | 7,67E-01 |
| <i>LOC642032</i>       | -1,02 | 5,25E-01 | 7,67E-01 |
| <i>CDC14A</i>          | -1,02 | 5,25E-01 | 7,67E-01 |
| <i>MAGEA10</i>         | 1,02  | 5,25E-01 | 7,67E-01 |
| <i>A_24_P931804</i>    | -1,03 | 5,25E-01 | 7,67E-01 |
| <i>RC11</i>            | 1,02  | 5,25E-01 | 7,67E-01 |
| <i>ECD</i>             | 1,02  | 5,25E-01 | 7,67E-01 |
| <i>BG030371</i>        | 1,03  | 5,25E-01 | 7,67E-01 |
| <i>AA703432</i>        | -1,02 | 5,25E-01 | 7,67E-01 |
| <i>AA420988</i>        | -1,03 | 5,25E-01 | 7,67E-01 |

|                        |       |          |          |
|------------------------|-------|----------|----------|
| <i>BX113895</i>        | -1,03 | 5,25E-01 | 7,67E-01 |
| <i>ZNF517</i>          | -1,03 | 5,25E-01 | 7,67E-01 |
| <i>FGFR2</i>           | -1,07 | 5,25E-01 | 7,67E-01 |
| <i>AK091904</i>        | -1,03 | 5,25E-01 | 7,67E-01 |
| <i>A_32_P93894</i>     | 1,03  | 5,25E-01 | 7,67E-01 |
| <i>FOXF2</i>           | 1,16  | 5,25E-01 | 7,67E-01 |
| <i>OR4N4</i>           | 1,02  | 5,25E-01 | 7,68E-01 |
| <i>FLJ36749</i>        | 1,02  | 5,25E-01 | 7,68E-01 |
| <i>A_24_P912994</i>    | 1,02  | 5,25E-01 | 7,68E-01 |
| <i>ZP1</i>             | 1,05  | 5,25E-01 | 7,68E-01 |
| <i>KIAA0372</i>        | -1,03 | 5,25E-01 | 7,68E-01 |
| <i>BQ359867</i>        | 1,02  | 5,25E-01 | 7,68E-01 |
| <i>FLJ25037</i>        | -1,03 | 5,25E-01 | 7,68E-01 |
| <i>KIAA1212</i>        | 1,03  | 5,25E-01 | 7,68E-01 |
| <i>A_32_P190864</i>    | -1,04 | 5,25E-01 | 7,68E-01 |
| <i>DA199974</i>        | -1,02 | 5,25E-01 | 7,68E-01 |
| <i>UNC13D</i>          | 1,02  | 5,25E-01 | 7,68E-01 |
| <i>A_24_P409410</i>    | 1,06  | 5,25E-01 | 7,68E-01 |
| <i>SPIB</i>            | -1,02 | 5,26E-01 | 7,68E-01 |
| <i>A_24_P324506</i>    | 1,04  | 5,26E-01 | 7,68E-01 |
| <i>SH2B3</i>           | 1,03  | 5,26E-01 | 7,68E-01 |
| <i>TRSPAP1</i>         | -1,02 | 5,26E-01 | 7,68E-01 |
| <i>ANKRD40</i>         | 1,02  | 5,26E-01 | 7,68E-01 |
| <i>ENST00000370238</i> | 1,04  | 5,26E-01 | 7,68E-01 |
| <i>A_24_P635355</i>    | 1,05  | 5,26E-01 | 7,68E-01 |
| <i>C16orf46</i>        | -1,02 | 5,26E-01 | 7,68E-01 |
| <i>TNFRSF13B</i>       | -1,03 | 5,26E-01 | 7,68E-01 |
| <i>ATP6V1B1</i>        | -1,02 | 5,26E-01 | 7,68E-01 |
| <i>THC2276639</i>      | -1,02 | 5,26E-01 | 7,68E-01 |
| <i>STXBP1</i>          | 1,03  | 5,26E-01 | 7,68E-01 |
| <i>VANGL1</i>          | 1,03  | 5,26E-01 | 7,68E-01 |
| <i>LL22NC01-81G9.2</i> | 1,04  | 5,26E-01 | 7,68E-01 |
| <i>SMR3A</i>           | -1,03 | 5,26E-01 | 7,68E-01 |
| <i>CYP2D6</i>          | -1,03 | 5,26E-01 | 7,68E-01 |
| <i>A_32_P163046</i>    | -1,03 | 5,26E-01 | 7,68E-01 |
| <i>NHN1</i>            | 1,02  | 5,26E-01 | 7,68E-01 |
| <i>SNTG1</i>           | 1,03  | 5,26E-01 | 7,68E-01 |
| <i>LYPLA2</i>          | 1,03  | 5,26E-01 | 7,68E-01 |
| <i>BP75</i>            | 1,03  | 5,26E-01 | 7,68E-01 |
| <i>BM982932</i>        | 1,03  | 5,26E-01 | 7,68E-01 |
| <i>AK057962</i>        | 1,03  | 5,26E-01 | 7,68E-01 |
| <i>AA586832</i>        | 1,03  | 5,26E-01 | 7,68E-01 |
| <i>MRPL24</i>          | -1,03 | 5,26E-01 | 7,68E-01 |
| <i>THC2373624</i>      | 1,02  | 5,26E-01 | 7,68E-01 |

|                        |       |          |          |
|------------------------|-------|----------|----------|
| <i>SPERT</i>           | 1,04  | 5,26E-01 | 7,68E-01 |
| <i>ADAM21</i>          | -1,03 | 5,26E-01 | 7,68E-01 |
| <i>W31297</i>          | -1,06 | 5,27E-01 | 7,68E-01 |
| <i>PEX14</i>           | -1,05 | 5,27E-01 | 7,68E-01 |
| <i>TMCO5</i>           | -1,03 | 5,27E-01 | 7,68E-01 |
| <i>ELF1</i>            | 1,03  | 5,27E-01 | 7,68E-01 |
| <i>SNRPE</i>           | -1,02 | 5,27E-01 | 7,68E-01 |
| <i>CTPS</i>            | -1,09 | 5,27E-01 | 7,68E-01 |
| <i>DB141416</i>        | -1,04 | 5,27E-01 | 7,68E-01 |
| <i>LOC440104</i>       | -1,03 | 5,27E-01 | 7,68E-01 |
| <i>ENST00000299563</i> | -1,03 | 5,27E-01 | 7,68E-01 |
| <i>PDE6C</i>           | -1,02 | 5,27E-01 | 7,68E-01 |
| <i>NOC2L</i>           | 1,02  | 5,27E-01 | 7,68E-01 |
| <i>DNTTIP1</i>         | 1,02  | 5,27E-01 | 7,68E-01 |
| <i>MYF5</i>            | 1,03  | 5,27E-01 | 7,68E-01 |
| <i>C21orf13</i>        | 1,05  | 5,27E-01 | 7,68E-01 |
| <i>AKAP14</i>          | -1,02 | 5,27E-01 | 7,68E-01 |
| <i>TULP2</i>           | 1,03  | 5,27E-01 | 7,68E-01 |
| <i>C9orf65</i>         | -1,10 | 5,27E-01 | 7,68E-01 |
| <i>AGBL4</i>           | -1,02 | 5,27E-01 | 7,69E-01 |
| <i>FAM108A1</i>        | 1,02  | 5,27E-01 | 7,69E-01 |
| <i>CCL3L3</i>          | -1,07 | 5,28E-01 | 7,69E-01 |
| <i>ENST00000264554</i> | -1,05 | 5,28E-01 | 7,69E-01 |
| <i>ENST00000322426</i> | -1,03 | 5,28E-01 | 7,69E-01 |
| <i>THC2289132</i>      | -1,03 | 5,28E-01 | 7,69E-01 |
| <i>C14orf93</i>        | -1,03 | 5,28E-01 | 7,69E-01 |
| <i>PARP6</i>           | -1,02 | 5,28E-01 | 7,69E-01 |
| <i>AF222857</i>        | 1,02  | 5,28E-01 | 7,69E-01 |
| <i>THC2346388</i>      | 1,03  | 5,28E-01 | 7,69E-01 |
| <i>SLC11A1</i>         | 1,03  | 5,28E-01 | 7,69E-01 |
| <i>HARS2</i>           | 1,03  | 5,28E-01 | 7,69E-01 |
| <i>A_24_P927782</i>    | 1,03  | 5,28E-01 | 7,69E-01 |
| <i>A_23_P58072</i>     | 1,03  | 5,28E-01 | 7,69E-01 |
| <i>SLC22A13</i>        | 1,04  | 5,28E-01 | 7,69E-01 |
| <i>A_24_P221974</i>    | 1,04  | 5,28E-01 | 7,69E-01 |
| <i>A_32_P4882</i>      | 1,15  | 5,28E-01 | 7,69E-01 |
| <i>FAM121B</i>         | -1,04 | 5,28E-01 | 7,69E-01 |
| <i>THC2444922</i>      | -1,03 | 5,28E-01 | 7,69E-01 |
| <i>THC2382759</i>      | -1,03 | 5,28E-01 | 7,69E-01 |
| <i>A_24_P237631</i>    | -1,02 | 5,28E-01 | 7,69E-01 |
| <i>GIPC2</i>           | -1,02 | 5,28E-01 | 7,69E-01 |
| <i>SPACA4</i>          | -1,02 | 5,28E-01 | 7,69E-01 |
| <i>LOC145837</i>       | 1,03  | 5,28E-01 | 7,69E-01 |
| <i>CASP7</i>           | -1,04 | 5,29E-01 | 7,70E-01 |

|                        |       |          |          |
|------------------------|-------|----------|----------|
| <i>BC047110</i>        | -1,04 | 5,29E-01 | 7,70E-01 |
| <i>IL10RB</i>          | -1,02 | 5,29E-01 | 7,70E-01 |
| <i>EIF2B4</i>          | -1,02 | 5,29E-01 | 7,70E-01 |
| <i>TMEM43</i>          | 1,03  | 5,29E-01 | 7,70E-01 |
| <i>NPAS4</i>           | 1,03  | 5,29E-01 | 7,70E-01 |
| <i>UBE2E2</i>          | -1,03 | 5,29E-01 | 7,70E-01 |
| <i>DSCR3</i>           | -1,02 | 5,29E-01 | 7,70E-01 |
| <i>PRO2900</i>         | 1,03  | 5,29E-01 | 7,70E-01 |
| <i>FSHB</i>            | 1,03  | 5,29E-01 | 7,70E-01 |
| <i>CABP5</i>           | 1,02  | 5,29E-01 | 7,70E-01 |
| <i>THC2442464</i>      | 1,04  | 5,29E-01 | 7,70E-01 |
| <i>THC2286878</i>      | 1,02  | 5,29E-01 | 7,70E-01 |
| <i>FIP1L1</i>          | 1,02  | 5,29E-01 | 7,70E-01 |
| <i>ACAT2</i>           | -1,04 | 5,29E-01 | 7,70E-01 |
| <i>ARMC2</i>           | 1,02  | 5,29E-01 | 7,70E-01 |
| <i>SRF</i>             | 1,06  | 5,29E-01 | 7,70E-01 |
| <i>THEG</i>            | -1,02 | 5,29E-01 | 7,70E-01 |
| <i>MASP2</i>           | 1,02  | 5,29E-01 | 7,70E-01 |
| <i>KIF2C</i>           | -1,03 | 5,29E-01 | 7,70E-01 |
| <i>C3orf45</i>         | -1,04 | 5,29E-01 | 7,70E-01 |
| <i>BM978504</i>        | 1,03  | 5,29E-01 | 7,70E-01 |
| <i>INSR</i>            | 1,05  | 5,29E-01 | 7,70E-01 |
| <i>LRCH2</i>           | -1,04 | 5,30E-01 | 7,70E-01 |
| <i>KIAA1893</i>        | -1,04 | 5,30E-01 | 7,70E-01 |
| <i>SPANXD</i>          | -1,03 | 5,30E-01 | 7,70E-01 |
| <i>AA628674</i>        | -1,02 | 5,30E-01 | 7,70E-01 |
| <i>ENST00000265659</i> | 1,02  | 5,30E-01 | 7,70E-01 |
| <i>IQSEC1</i>          | 1,03  | 5,30E-01 | 7,70E-01 |
| <i>CD5L</i>            | -1,03 | 5,30E-01 | 7,70E-01 |
| <i>HSPC142</i>         | -1,02 | 5,30E-01 | 7,70E-01 |
| <i>A_24_P221485</i>    | 1,04  | 5,30E-01 | 7,70E-01 |
| <i>THC2249577</i>      | 1,02  | 5,30E-01 | 7,71E-01 |
| <i>BC043229</i>        | 1,02  | 5,30E-01 | 7,71E-01 |
| <i>RUNDC2A</i>         | 1,03  | 5,30E-01 | 7,71E-01 |
| <i>RHBDL1</i>          | 1,05  | 5,30E-01 | 7,71E-01 |
| <i>CDA</i>             | -1,04 | 5,30E-01 | 7,71E-01 |
| <i>AF085960</i>        | -1,03 | 5,30E-01 | 7,71E-01 |
| <i>HIST1H1E</i>        | 1,05  | 5,30E-01 | 7,71E-01 |
| <i>THC2278193</i>      | -1,06 | 5,30E-01 | 7,71E-01 |
| <i>ARHGAP22</i>        | -1,05 | 5,30E-01 | 7,71E-01 |
| <i>RP11-493K23.2</i>   | -1,03 | 5,30E-01 | 7,71E-01 |
| <i>PROZ</i>            | -1,02 | 5,30E-01 | 7,71E-01 |
| <i>OR2C1</i>           | -1,02 | 5,30E-01 | 7,71E-01 |
| <i>NSF</i>             | -1,02 | 5,30E-01 | 7,71E-01 |

|                        |       |          |          |
|------------------------|-------|----------|----------|
| <i>PRDM4</i>           | -1,02 | 5,30E-01 | 7,71E-01 |
| <i>C10orf51</i>        | 1,02  | 5,30E-01 | 7,71E-01 |
| <i>A_32_P22245</i>     | 1,03  | 5,30E-01 | 7,71E-01 |
| <i>GNA11</i>           | 1,03  | 5,30E-01 | 7,71E-01 |
| <i>RPL39L</i>          | 1,02  | 5,30E-01 | 7,71E-01 |
| <i>AK056734</i>        | -1,03 | 5,31E-01 | 7,71E-01 |
| <i>A_24_P178723</i>    | -1,04 | 5,31E-01 | 7,71E-01 |
| <i>DSPG3</i>           | -1,03 | 5,31E-01 | 7,71E-01 |
| <i>A_24_P307306</i>    | 1,07  | 5,31E-01 | 7,71E-01 |
| <i>STX3</i>            | -1,03 | 5,31E-01 | 7,71E-01 |
| <i>C11orf10</i>        | -1,03 | 5,31E-01 | 7,71E-01 |
| <i>HTR7</i>            | 1,03  | 5,31E-01 | 7,71E-01 |
| <i>TSSK2</i>           | 1,02  | 5,31E-01 | 7,71E-01 |
| <i>LOC646960</i>       | 1,05  | 5,31E-01 | 7,71E-01 |
| <i>WNT7A</i>           | -1,02 | 5,31E-01 | 7,71E-01 |
| <i>AK001966</i>        | -1,02 | 5,31E-01 | 7,71E-01 |
| <i>MARK4</i>           | 1,02  | 5,31E-01 | 7,71E-01 |
| <i>NALP6</i>           | 1,04  | 5,31E-01 | 7,71E-01 |
| <i>NKX6-2</i>          | 1,02  | 5,31E-01 | 7,71E-01 |
| <i>ENST00000231198</i> | -1,02 | 5,31E-01 | 7,71E-01 |
| <i>NAP1L1</i>          | 1,03  | 5,31E-01 | 7,71E-01 |
| <i>FGF13</i>           | 1,05  | 5,31E-01 | 7,71E-01 |
| <i>POLR2F</i>          | -1,02 | 5,31E-01 | 7,71E-01 |
| <i>ART4</i>            | -1,05 | 5,31E-01 | 7,71E-01 |
| <i>LOC401357</i>       | -1,03 | 5,32E-01 | 7,71E-01 |
| <i>LOC389124</i>       | 1,03  | 5,32E-01 | 7,71E-01 |
| <i>C9orf44</i>         | 1,04  | 5,32E-01 | 7,71E-01 |
| <i>TRIM48</i>          | 1,02  | 5,32E-01 | 7,71E-01 |
| <i>FLJ36004</i>        | -1,02 | 5,32E-01 | 7,72E-01 |
| <i>A_24_P556503</i>    | 1,03  | 5,32E-01 | 7,72E-01 |
| <i>PPP1R1C</i>         | 1,05  | 5,32E-01 | 7,72E-01 |
| <i>THC2439327</i>      | -1,02 | 5,32E-01 | 7,72E-01 |
| <i>RPN2</i>            | 1,03  | 5,32E-01 | 7,72E-01 |
| <i>DB345776</i>        | -1,02 | 5,32E-01 | 7,72E-01 |
| <i>UNQ1887</i>         | -1,02 | 5,32E-01 | 7,72E-01 |
| <i>A_24_P272523</i>    | 1,02  | 5,32E-01 | 7,72E-01 |
| <i>BCL2L10</i>         | 1,04  | 5,32E-01 | 7,72E-01 |
| <i>OAF</i>             | -1,05 | 5,32E-01 | 7,72E-01 |
| <i>SERPINB9</i>        | -1,04 | 5,32E-01 | 7,72E-01 |
| <i>TMEM54</i>          | -1,04 | 5,32E-01 | 7,72E-01 |
| <i>INCENP</i>          | -1,03 | 5,32E-01 | 7,72E-01 |
| <i>AV686050</i>        | -1,02 | 5,32E-01 | 7,72E-01 |
| <i>THC2406749</i>      | -1,02 | 5,32E-01 | 7,72E-01 |
| <i>NBL1</i>            | -1,06 | 5,32E-01 | 7,72E-01 |



|                        |       |          |          |
|------------------------|-------|----------|----------|
| <i>RG9MTD3</i>         | -1,02 | 5,32E-01 | 7,72E-01 |
| <i>A_24_P350027</i>    | -1,02 | 5,32E-01 | 7,72E-01 |
| <i>FTSJ1</i>           | 1,02  | 5,32E-01 | 7,72E-01 |
| <i>HOXC12</i>          | 1,02  | 5,32E-01 | 7,72E-01 |
| <i>AF264622</i>        | -1,07 | 5,32E-01 | 7,72E-01 |
| <i>NUCB1</i>           | 1,03  | 5,32E-01 | 7,72E-01 |
| <i>AF086013</i>        | 1,02  | 5,33E-01 | 7,72E-01 |
| <i>LOC346887</i>       | 1,03  | 5,33E-01 | 7,72E-01 |
| <i>THC2259511</i>      | -1,03 | 5,33E-01 | 7,72E-01 |
| <i>LRFN4</i>           | 1,03  | 5,33E-01 | 7,72E-01 |
| <i>A_32_P17416</i>     | 1,04  | 5,33E-01 | 7,72E-01 |
| <i>AL581048</i>        | 1,04  | 5,33E-01 | 7,72E-01 |
| <i>BY798288</i>        | 1,04  | 5,33E-01 | 7,72E-01 |
| <i>ENST00000359244</i> | -1,03 | 5,33E-01 | 7,72E-01 |
| <i>BC007784</i>        | -1,02 | 5,33E-01 | 7,72E-01 |
| <i>ENST00000332342</i> | 1,02  | 5,33E-01 | 7,72E-01 |
| <i>MAP7</i>            | 1,03  | 5,33E-01 | 7,72E-01 |
| <i>A_24_P934718</i>    | 1,03  | 5,33E-01 | 7,72E-01 |
| <i>CACHD1</i>          | -1,03 | 5,33E-01 | 7,73E-01 |
| <i>LOC124491</i>       | -1,03 | 5,33E-01 | 7,73E-01 |
| <i>A_32_P61708</i>     | 1,03  | 5,33E-01 | 7,73E-01 |
| <i>A_23_P61191</i>     | -1,03 | 5,33E-01 | 7,73E-01 |
| <i>AY358806</i>        | -1,03 | 5,34E-01 | 7,73E-01 |
| <i>LOC253970</i>       | -1,03 | 5,34E-01 | 7,73E-01 |
| <i>CHPF</i>            | -1,04 | 5,34E-01 | 7,73E-01 |
| <i>GABRE</i>           | 1,08  | 5,34E-01 | 7,73E-01 |
| <i>CCL21</i>           | -1,08 | 5,34E-01 | 7,73E-01 |
| <i>ENST00000353551</i> | -1,06 | 5,34E-01 | 7,73E-01 |
| <i>GSC</i>             | -1,05 | 5,34E-01 | 7,73E-01 |
| <i>PSIP1</i>           | -1,03 | 5,34E-01 | 7,73E-01 |
| <i>UNQ6411</i>         | -1,03 | 5,34E-01 | 7,73E-01 |
| <i>AK098185</i>        | -1,03 | 5,34E-01 | 7,73E-01 |
| <i>A_24_P273004</i>    | -1,03 | 5,34E-01 | 7,73E-01 |
| <i>RNU3IP2</i>         | -1,03 | 5,34E-01 | 7,73E-01 |
| <i>COPA</i>            | -1,02 | 5,34E-01 | 7,73E-01 |
| <i>UBR1</i>            | 1,02  | 5,34E-01 | 7,73E-01 |
| <i>SLC9A8</i>          | 1,02  | 5,34E-01 | 7,73E-01 |
| <i>CYP11B2</i>         | 1,02  | 5,34E-01 | 7,73E-01 |
| <i>TRPV4</i>           | 1,03  | 5,34E-01 | 7,73E-01 |
| <i>CCT2</i>            | 1,03  | 5,34E-01 | 7,73E-01 |
| <i>C12orf12</i>        | 1,03  | 5,34E-01 | 7,73E-01 |
| <i>THC2269516</i>      | 1,03  | 5,34E-01 | 7,73E-01 |
| <i>TIMM8B</i>          | 1,03  | 5,34E-01 | 7,73E-01 |
| <i>A_24_P67063</i>     | 1,03  | 5,34E-01 | 7,73E-01 |

|                        |       |          |          |
|------------------------|-------|----------|----------|
| <i>LOC388323</i>       | 1,03  | 5,34E-01 | 7,73E-01 |
| <i>A_24_P921597</i>    | 1,05  | 5,34E-01 | 7,73E-01 |
| <i>SLC4A8</i>          | 1,05  | 5,34E-01 | 7,73E-01 |
| <i>ENST00000376155</i> | 1,06  | 5,34E-01 | 7,73E-01 |
| <i>CNN2</i>            | -1,04 | 5,34E-01 | 7,73E-01 |
| <i>HMX2</i>            | -1,03 | 5,34E-01 | 7,73E-01 |
| <i>AK092681</i>        | -1,03 | 5,34E-01 | 7,73E-01 |
| <i>MEIS3</i>           | -1,03 | 5,35E-01 | 7,73E-01 |
| <i>RBMX</i>            | -1,02 | 5,34E-01 | 7,73E-01 |
| <i>TNFRSF19</i>        | 1,04  | 5,35E-01 | 7,73E-01 |
| <i>OTUD1</i>           | -1,04 | 5,35E-01 | 7,73E-01 |
| <i>THC2280739</i>      | -1,04 | 5,35E-01 | 7,73E-01 |
| <i>SEC22A</i>          | 1,02  | 5,35E-01 | 7,73E-01 |
| <i>THC2279671</i>      | 1,02  | 5,35E-01 | 7,73E-01 |
| <i>C14orf149</i>       | -1,03 | 5,35E-01 | 7,73E-01 |
| <i>FAM101B</i>         | 1,06  | 5,35E-01 | 7,73E-01 |
| <i>C16orf3</i>         | 1,06  | 5,35E-01 | 7,73E-01 |
| <i>JAK2</i>            | 1,03  | 5,35E-01 | 7,74E-01 |
| <i>AW009873</i>        | 1,03  | 5,35E-01 | 7,74E-01 |
| <i>AK092083</i>        | -1,06 | 5,35E-01 | 7,74E-01 |
| <i>C2orf17</i>         | -1,04 | 5,35E-01 | 7,74E-01 |
| <i>ERAL1</i>           | -1,02 | 5,35E-01 | 7,74E-01 |
| <i>KIAA1614</i>        | 1,02  | 5,35E-01 | 7,74E-01 |
| <i>A_32_P136130</i>    | 1,03  | 5,35E-01 | 7,74E-01 |
| <i>TAF1B</i>           | 1,03  | 5,35E-01 | 7,74E-01 |
| <i>LOC283666</i>       | 1,04  | 5,35E-01 | 7,74E-01 |
| <i>POU2F1</i>          | -1,02 | 5,35E-01 | 7,74E-01 |
| <i>AK097700</i>        | 1,03  | 5,35E-01 | 7,74E-01 |
| <i>SSX6</i>            | -1,03 | 5,36E-01 | 7,74E-01 |
| <i>CCDC104</i>         | 1,03  | 5,36E-01 | 7,74E-01 |
| <i>THC2437143</i>      | -1,05 | 5,36E-01 | 7,74E-01 |
| <i>MTERF</i>           | -1,24 | 5,36E-01 | 7,74E-01 |
| <i>BG998430</i>        | -1,07 | 5,36E-01 | 7,74E-01 |
| <i>THC2386010</i>      | -1,03 | 5,36E-01 | 7,74E-01 |
| <i>A_24_P928705</i>    | -1,03 | 5,36E-01 | 7,74E-01 |
| <i>RPL14</i>           | -1,02 | 5,36E-01 | 7,74E-01 |
| <i>AY204747</i>        | -1,02 | 5,36E-01 | 7,74E-01 |
| <i>USH2A</i>           | -1,02 | 5,36E-01 | 7,74E-01 |
| <i>PGPEP1</i>          | 1,03  | 5,36E-01 | 7,74E-01 |
| <i>ENST00000313294</i> | 1,04  | 5,36E-01 | 7,74E-01 |
| <i>TES</i>             | 1,12  | 5,36E-01 | 7,74E-01 |
| <i>A_24_P341489</i>    | -1,02 | 5,36E-01 | 7,74E-01 |
| <i>AF186017</i>        | -1,02 | 5,36E-01 | 7,74E-01 |
| <i>LOC646519</i>       | 1,02  | 5,36E-01 | 7,74E-01 |

|                     |       |          |          |
|---------------------|-------|----------|----------|
| <i>OR4S1</i>        | 1,03  | 5,36E-01 | 7,74E-01 |
| <i>KLK3</i>         | 1,05  | 5,36E-01 | 7,74E-01 |
| <i>TUBGCP2</i>      | -1,02 | 5,36E-01 | 7,74E-01 |
| <i>A_24_P502752</i> | -1,03 | 5,36E-01 | 7,74E-01 |
| <i>A_32_P187160</i> | -1,04 | 5,36E-01 | 7,74E-01 |
| <i>THC2286382</i>   | 1,03  | 5,36E-01 | 7,74E-01 |
| <i>A_24_P496034</i> | -1,02 | 5,36E-01 | 7,75E-01 |
| <i>SLC26A11</i>     | -1,03 | 5,37E-01 | 7,75E-01 |
| <i>INHBC</i>        | -1,03 | 5,37E-01 | 7,75E-01 |
| <i>BX088949</i>     | 1,02  | 5,37E-01 | 7,75E-01 |
| <i>C11orf44</i>     | 1,02  | 5,37E-01 | 7,75E-01 |
| <i>A_24_P918364</i> | 1,03  | 5,37E-01 | 7,75E-01 |
| <i>FLJ16478</i>     | -1,02 | 5,37E-01 | 7,75E-01 |
| <i>CALR3</i>        | -1,02 | 5,37E-01 | 7,75E-01 |
| <i>LOC283079</i>    | 1,02  | 5,37E-01 | 7,75E-01 |
| <i>PUS7</i>         | -1,03 | 5,37E-01 | 7,75E-01 |
| <i>BC022417</i>     | -1,03 | 5,37E-01 | 7,75E-01 |
| <i>ESCO2</i>        | -1,03 | 5,37E-01 | 7,75E-01 |
| <i>BOLL</i>         | -1,02 | 5,37E-01 | 7,75E-01 |
| <i>TNRC15</i>       | 1,02  | 5,37E-01 | 7,75E-01 |
| <i>PTPRR</i>        | 1,06  | 5,37E-01 | 7,75E-01 |
| <i>CHRNE</i>        | 1,04  | 5,37E-01 | 7,75E-01 |
| <i>A_32_P148683</i> | -1,02 | 5,37E-01 | 7,75E-01 |
| <i>A_32_P121537</i> | -1,05 | 5,37E-01 | 7,75E-01 |
| <i>ACACB</i>        | 1,03  | 5,37E-01 | 7,75E-01 |
| <i>AK026422</i>     | -1,02 | 5,37E-01 | 7,75E-01 |
| <i>THC2431799</i>   | -1,03 | 5,38E-01 | 7,75E-01 |
| <i>C9orf123</i>     | -1,02 | 5,38E-01 | 7,75E-01 |
| <i>THC2437445</i>   | 1,02  | 5,38E-01 | 7,75E-01 |
| <i>AA516102</i>     | 1,02  | 5,38E-01 | 7,75E-01 |
| <i>THC2317192</i>   | 1,02  | 5,38E-01 | 7,76E-01 |
| <i>THC2302971</i>   | -1,02 | 5,38E-01 | 7,76E-01 |
| <i>RABGGTB</i>      | 1,02  | 5,38E-01 | 7,76E-01 |
| <i>AF119870</i>     | 1,02  | 5,38E-01 | 7,76E-01 |
| <i>ANKRD12</i>      | 1,02  | 5,38E-01 | 7,76E-01 |
| <i>AL138396</i>     | 1,02  | 5,38E-01 | 7,76E-01 |
| <i>BC010426</i>     | 1,03  | 5,38E-01 | 7,76E-01 |
| <i>COLQ</i>         | 1,03  | 5,38E-01 | 7,76E-01 |
| <i>A_24_P920463</i> | 1,02  | 5,38E-01 | 7,76E-01 |
| <i>A_24_P324538</i> | -1,04 | 5,38E-01 | 7,76E-01 |
| <i>ZNF461</i>       | -1,02 | 5,38E-01 | 7,76E-01 |
| <i>AF116662</i>     | 1,02  | 5,38E-01 | 7,76E-01 |
| <i>PFKL</i>         | 1,05  | 5,38E-01 | 7,76E-01 |
| <i>A_24_P502724</i> | -1,03 | 5,38E-01 | 7,76E-01 |

|                        |       |          |          |
|------------------------|-------|----------|----------|
| <i>TM2D3</i>           | -1,03 | 5,38E-01 | 7,76E-01 |
| <i>CR627448</i>        | 1,05  | 5,38E-01 | 7,76E-01 |
| <i>LOC197322</i>       | 1,02  | 5,39E-01 | 7,76E-01 |
| <i>TOMM40</i>          | 1,02  | 5,39E-01 | 7,76E-01 |
| <i>A_24_P480206</i>    | 1,04  | 5,39E-01 | 7,76E-01 |
| <i>DMRT1</i>           | 1,19  | 5,39E-01 | 7,76E-01 |
| <i>HIST1H2BC</i>       | -1,02 | 5,39E-01 | 7,76E-01 |
| <i>ACTL7B</i>          | -1,02 | 5,39E-01 | 7,76E-01 |
| <i>NBEAL2</i>          | 1,03  | 5,39E-01 | 7,76E-01 |
| <i>CRISPLD1</i>        | -1,04 | 5,39E-01 | 7,76E-01 |
| <i>CPEB1</i>           | 1,04  | 5,39E-01 | 7,76E-01 |
| <i>LYNX1</i>           | -1,03 | 5,39E-01 | 7,76E-01 |
| <i>BAZ1A</i>           | 1,03  | 5,39E-01 | 7,76E-01 |
| <i>C11orf74</i>        | 1,02  | 5,39E-01 | 7,77E-01 |
| <i>LECT2</i>           | 1,02  | 5,39E-01 | 7,77E-01 |
| <i>ODF2</i>            | -1,02 | 5,39E-01 | 7,77E-01 |
| <i>PKD2L1</i>          | 1,06  | 5,39E-01 | 7,77E-01 |
| <i>KCNE1</i>           | 1,02  | 5,39E-01 | 7,77E-01 |
| <i>TMEM161A</i>        | -1,02 | 5,39E-01 | 7,77E-01 |
| <i>HHIP</i>            | -1,04 | 5,40E-01 | 7,77E-01 |
| <i>RNASE7</i>          | -1,04 | 5,40E-01 | 7,77E-01 |
| <i>DMXL2</i>           | -1,03 | 5,40E-01 | 7,77E-01 |
| <i>SERF1B</i>          | 1,03  | 5,40E-01 | 7,77E-01 |
| <i>GATA3</i>           | 1,07  | 5,40E-01 | 7,77E-01 |
| <i>KIAA1622</i>        | 1,11  | 5,40E-01 | 7,77E-01 |
| <i>A_32_P64832</i>     | -1,03 | 5,40E-01 | 7,77E-01 |
| <i>THC2377635</i>      | 1,03  | 5,40E-01 | 7,77E-01 |
| <i>CYP1A1</i>          | 1,09  | 5,40E-01 | 7,77E-01 |
| <i>BOK</i>             | -1,06 | 5,40E-01 | 7,77E-01 |
| <i>THC2250386</i>      | -1,03 | 5,40E-01 | 7,77E-01 |
| <i>T12590</i>          | -1,02 | 5,40E-01 | 7,77E-01 |
| <i>C6orf21</i>         | 1,02  | 5,40E-01 | 7,77E-01 |
| <i>A_24_P920610</i>    | 1,03  | 5,40E-01 | 7,77E-01 |
| <i>LOC648498</i>       | -1,03 | 5,40E-01 | 7,77E-01 |
| <i>THC2454812</i>      | 1,05  | 5,40E-01 | 7,77E-01 |
| <i>HUNK</i>            | 1,02  | 5,40E-01 | 7,78E-01 |
| <i>U50277</i>          | 1,03  | 5,40E-01 | 7,78E-01 |
| <i>A_24_P290188</i>    | -1,05 | 5,41E-01 | 7,78E-01 |
| <i>H2AFY</i>           | 1,02  | 5,41E-01 | 7,78E-01 |
| <i>CR624187</i>        | 1,02  | 5,41E-01 | 7,78E-01 |
| <i>ABCA2</i>           | 1,02  | 5,41E-01 | 7,78E-01 |
| <i>AK001116</i>        | -1,08 | 5,41E-01 | 7,78E-01 |
| <i>RPH3A</i>           | 1,02  | 5,41E-01 | 7,78E-01 |
| <i>ENST00000074056</i> | 1,02  | 5,41E-01 | 7,78E-01 |

|                        |       |          |          |
|------------------------|-------|----------|----------|
| <i>E2F8</i>            | -1,03 | 5,41E-01 | 7,78E-01 |
| <i>SNX1</i>            | -1,02 | 5,41E-01 | 7,78E-01 |
| <i>CARD6</i>           | 1,05  | 5,41E-01 | 7,78E-01 |
| <i>SHANK1</i>          | 1,02  | 5,41E-01 | 7,78E-01 |
| <i>PTCHD1</i>          | -1,14 | 5,41E-01 | 7,78E-01 |
| <i>BRWD3</i>           | 1,02  | 5,41E-01 | 7,78E-01 |
| <i>DDX58</i>           | 1,05  | 5,41E-01 | 7,78E-01 |
| <i>THC2428103</i>      | -1,02 | 5,42E-01 | 7,78E-01 |
| <i>DDX42</i>           | -1,02 | 5,41E-01 | 7,78E-01 |
| <i>THC2460496</i>      | -1,02 | 5,42E-01 | 7,78E-01 |
| <i>A_32_P138939</i>    | 1,02  | 5,42E-01 | 7,78E-01 |
| <i>CN271748</i>        | 1,03  | 5,42E-01 | 7,78E-01 |
| <i>A_24_P383680</i>    | -1,03 | 5,42E-01 | 7,79E-01 |
| <i>CUL1</i>            | 1,02  | 5,42E-01 | 7,79E-01 |
| <i>NPHP4</i>           | -1,02 | 5,42E-01 | 7,79E-01 |
| <i>RPL18A</i>          | -1,02 | 5,42E-01 | 7,79E-01 |
| <i>FAM26A</i>          | 1,02  | 5,42E-01 | 7,79E-01 |
| <i>PTK9</i>            | 1,02  | 5,42E-01 | 7,79E-01 |
| <i>ENST00000339489</i> | 1,03  | 5,42E-01 | 7,79E-01 |
| <i>TFF2</i>            | -1,03 | 5,42E-01 | 7,79E-01 |
| <i>AL137571</i>        | -1,02 | 5,42E-01 | 7,79E-01 |
| <i>MGC11082</i>        | 1,03  | 5,42E-01 | 7,79E-01 |
| <i>LCE3D</i>           | -1,23 | 5,42E-01 | 7,79E-01 |
| <i>C9orf103</i>        | 1,02  | 5,42E-01 | 7,79E-01 |
| <i>LPP</i>             | 1,07  | 5,42E-01 | 7,79E-01 |
| <i>CHAC1</i>           | -1,11 | 5,42E-01 | 7,79E-01 |
| <i>A_24_P7040</i>      | -1,03 | 5,42E-01 | 7,79E-01 |
| <i>SLC25A28</i>        | 1,02  | 5,42E-01 | 7,79E-01 |
| <i>A_32_P73991</i>     | 1,03  | 5,42E-01 | 7,79E-01 |
| <i>A_24_P928804</i>    | 1,04  | 5,42E-01 | 7,79E-01 |
| <i>LOC133308</i>       | 1,03  | 5,42E-01 | 7,79E-01 |
| <i>SLC5A11</i>         | -1,03 | 5,42E-01 | 7,79E-01 |
| <i>PIK3C2B</i>         | 1,03  | 5,42E-01 | 7,79E-01 |
| <i>GABRR1</i>          | 1,02  | 5,43E-01 | 7,79E-01 |
| <i>ENST00000297487</i> | -1,02 | 5,43E-01 | 7,79E-01 |
| <i>COL8A2</i>          | -1,04 | 5,43E-01 | 7,79E-01 |
| <i>THC2343997</i>      | -1,02 | 5,43E-01 | 7,79E-01 |
| <i>BF436068</i>        | 1,03  | 5,43E-01 | 7,79E-01 |
| <i>ATP6V1C2</i>        | -1,03 | 5,43E-01 | 7,80E-01 |
| <i>X58739</i>          | -1,03 | 5,43E-01 | 7,80E-01 |
| <i>POU3F2</i>          | -1,02 | 5,43E-01 | 7,80E-01 |
| <i>TM9SF4</i>          | -1,02 | 5,43E-01 | 7,80E-01 |
| <i>THC2383838</i>      | -1,04 | 5,43E-01 | 7,80E-01 |
| <i>AK095986</i>        | -1,04 | 5,43E-01 | 7,80E-01 |

|                        |       |          |          |
|------------------------|-------|----------|----------|
| <i>PHC3</i>            | 1,02  | 5,43E-01 | 7,80E-01 |
| <i>A_24_P144303</i>    | -1,03 | 5,44E-01 | 7,80E-01 |
| <i>PPP1CB</i>          | 1,05  | 5,43E-01 | 7,80E-01 |
| <i>CR624291</i>        | -1,02 | 5,44E-01 | 7,80E-01 |
| <i>ANKRD44</i>         | -1,04 | 5,44E-01 | 7,80E-01 |
| <i>OR4A15</i>          | 1,02  | 5,44E-01 | 7,80E-01 |
| <i>ZNF521</i>          | 1,04  | 5,44E-01 | 7,80E-01 |
| <i>LOC388503</i>       | 1,02  | 5,44E-01 | 7,80E-01 |
| <i>ENST00000356931</i> | 1,03  | 5,44E-01 | 7,80E-01 |
| <i>C3orf64</i>         | 1,05  | 5,44E-01 | 7,80E-01 |
| <i>ADAMTSL3</i>        | 1,07  | 5,44E-01 | 7,80E-01 |
| <i>THC2297522</i>      | -1,02 | 5,44E-01 | 7,81E-01 |
| <i>TRIM44</i>          | -1,02 | 5,44E-01 | 7,81E-01 |
| <i>EIF3S5</i>          | -1,02 | 5,44E-01 | 7,81E-01 |
| <i>THC2441863</i>      | 1,03  | 5,45E-01 | 7,81E-01 |
| <i>MYH9</i>            | 1,02  | 5,45E-01 | 7,81E-01 |
| <i>AV740906</i>        | 1,02  | 5,45E-01 | 7,81E-01 |
| <i>RCN1</i>            | 1,04  | 5,45E-01 | 7,81E-01 |
| <i>FRMD3</i>           | -1,03 | 5,45E-01 | 7,81E-01 |
| <i>TMEM144</i>         | 1,02  | 5,45E-01 | 7,81E-01 |
| <i>EXDL2</i>           | -1,02 | 5,45E-01 | 7,81E-01 |
| <i>AI263083</i>        | 1,02  | 5,45E-01 | 7,81E-01 |
| <i>PGS1</i>            | 1,02  | 5,45E-01 | 7,81E-01 |
| <i>VMO1</i>            | 1,05  | 5,45E-01 | 7,81E-01 |
| <i>CCNK</i>            | 1,02  | 5,45E-01 | 7,81E-01 |
| <i>PRTN3</i>           | 1,02  | 5,45E-01 | 7,81E-01 |
| <i>C12orf53</i>        | 1,05  | 5,45E-01 | 7,81E-01 |
| <i>A_24_P657117</i>    | -1,02 | 5,45E-01 | 7,81E-01 |
| <i>OPN1LW</i>          | 1,03  | 5,45E-01 | 7,81E-01 |
| <i>THC2373975</i>      | -1,03 | 5,45E-01 | 7,81E-01 |
| <i>A_24_P306754</i>    | 1,05  | 5,45E-01 | 7,82E-01 |
| <i>NMRAL1</i>          | -1,02 | 5,45E-01 | 7,82E-01 |
| <i>PGBD3</i>           | 1,02  | 5,45E-01 | 7,82E-01 |
| <i>THC2418191</i>      | 1,03  | 5,45E-01 | 7,82E-01 |
| <i>KLK6</i>            | -1,04 | 5,45E-01 | 7,82E-01 |
| <i>BE816002</i>        | 1,05  | 5,46E-01 | 7,82E-01 |
| <i>DPAGT1</i>          | -1,02 | 5,46E-01 | 7,82E-01 |
| <i>THC2278244</i>      | -1,02 | 5,46E-01 | 7,82E-01 |
| <i>A_24_P923303</i>    | -1,03 | 5,46E-01 | 7,82E-01 |
| <i>DPYS</i>            | 1,01  | 5,46E-01 | 7,82E-01 |
| <i>FLJ37060</i>        | -1,02 | 5,46E-01 | 7,82E-01 |
| <i>CEP250</i>          | -1,03 | 5,46E-01 | 7,82E-01 |
| <i>AI433842</i>        | -1,02 | 5,46E-01 | 7,82E-01 |
| <i>C8B</i>             | 1,03  | 5,46E-01 | 7,82E-01 |

|                        |       |          |          |
|------------------------|-------|----------|----------|
| <i>KRT6IRS</i>         | -1,03 | 5,46E-01 | 7,82E-01 |
| <i>PSMB9</i>           | -1,03 | 5,46E-01 | 7,82E-01 |
| <i>FKBP3</i>           | -1,02 | 5,46E-01 | 7,82E-01 |
| <i>A_32_P225328</i>    | -1,32 | 5,46E-01 | 7,82E-01 |
| <i>LILRA6</i>          | -1,04 | 5,47E-01 | 7,82E-01 |
| <i>GALNS</i>           | -1,03 | 5,46E-01 | 7,82E-01 |
| <i>AF289552</i>        | -1,03 | 5,47E-01 | 7,82E-01 |
| <i>A_32_P32905</i>     | -1,03 | 5,47E-01 | 7,82E-01 |
| <i>KRTAP13-3</i>       | -1,02 | 5,46E-01 | 7,82E-01 |
| <i>KIAA0195</i>        | -1,02 | 5,46E-01 | 7,82E-01 |
| <i>GADD45GIP1</i>      | -1,02 | 5,46E-01 | 7,82E-01 |
| <i>BU161495</i>        | 1,02  | 5,46E-01 | 7,82E-01 |
| <i>IRAK1BP1</i>        | 1,02  | 5,47E-01 | 7,82E-01 |
| <i>TBPL1</i>           | 1,03  | 5,47E-01 | 7,82E-01 |
| <i>THC2274876</i>      | 1,03  | 5,47E-01 | 7,82E-01 |
| <i>STEAP1</i>          | 1,06  | 5,46E-01 | 7,82E-01 |
| <i>C20orf160</i>       | -1,03 | 5,47E-01 | 7,82E-01 |
| <i>CTF1</i>            | -1,02 | 5,47E-01 | 7,82E-01 |
| <i>ENST00000370623</i> | 1,02  | 5,47E-01 | 7,82E-01 |
| <i>ARSJ</i>            | 1,06  | 5,47E-01 | 7,83E-01 |
| <i>MAMDC4</i>          | 1,03  | 5,47E-01 | 7,83E-01 |
| <i>MGC33846</i>        | -1,05 | 5,47E-01 | 7,83E-01 |
| <i>ENST00000321130</i> | -1,02 | 5,47E-01 | 7,83E-01 |
| <i>A_24_P195454</i>    | -1,02 | 5,47E-01 | 7,83E-01 |
| <i>PSG9</i>            | 1,02  | 5,47E-01 | 7,83E-01 |
| <i>YWHAB</i>           | 1,02  | 5,47E-01 | 7,83E-01 |
| <i>SULT1C1</i>         | 1,05  | 5,47E-01 | 7,83E-01 |
| <i>A_32_P167111</i>    | 1,04  | 5,47E-01 | 7,83E-01 |
| <i>A_32_P51688</i>     | -1,02 | 5,47E-01 | 7,83E-01 |
| <i>SKP1A</i>           | 1,02  | 5,47E-01 | 7,83E-01 |
| <i>TTY20</i>           | 1,02  | 5,48E-01 | 7,83E-01 |
| <i>A_24_P930596</i>    | 1,02  | 5,48E-01 | 7,83E-01 |
| <i>KRTAP4-9</i>        | -1,03 | 5,48E-01 | 7,83E-01 |
| <i>OR6M1</i>           | 1,02  | 5,48E-01 | 7,83E-01 |
| <i>TNFRSF18</i>        | -1,02 | 5,48E-01 | 7,83E-01 |
| <i>MYST2</i>           | -1,03 | 5,48E-01 | 7,83E-01 |
| <i>MRPS12</i>          | -1,02 | 5,48E-01 | 7,83E-01 |
| <i>A_24_P312594</i>    | 1,02  | 5,48E-01 | 7,83E-01 |
| <i>RSPO1</i>           | 1,11  | 5,48E-01 | 7,84E-01 |
| <i>THC2386192</i>      | -1,05 | 5,48E-01 | 7,84E-01 |
| <i>A_24_P942870</i>    | 1,02  | 5,48E-01 | 7,84E-01 |
| <i>NUAK1</i>           | 1,04  | 5,48E-01 | 7,84E-01 |
| <i>CELSR1</i>          | 1,05  | 5,48E-01 | 7,84E-01 |
| <i>THC2378839</i>      | -1,02 | 5,48E-01 | 7,84E-01 |

|                        |       |          |          |
|------------------------|-------|----------|----------|
| <i>SIRT6</i>           | 1,02  | 5,48E-01 | 7,84E-01 |
| <i>THC2394411</i>      | -1,02 | 5,48E-01 | 7,84E-01 |
| <i>A_23_P9707</i>      | 1,03  | 5,48E-01 | 7,84E-01 |
| <i>LOC286002</i>       | -1,04 | 5,49E-01 | 7,84E-01 |
| <i>THC2339658</i>      | -1,03 | 5,48E-01 | 7,84E-01 |
| <i>THC2310223</i>      | -1,03 | 5,48E-01 | 7,84E-01 |
| <i>MRPL53</i>          | 1,02  | 5,49E-01 | 7,84E-01 |
| <i>A_24_P101661</i>    | -1,06 | 5,49E-01 | 7,84E-01 |
| <i>PRTG</i>            | -1,03 | 5,49E-01 | 7,84E-01 |
| <i>SCGB1C1</i>         | -1,02 | 5,49E-01 | 7,84E-01 |
| <i>MAN2B2</i>          | 1,02  | 5,49E-01 | 7,84E-01 |
| <i>UNC5D</i>           | 1,03  | 5,49E-01 | 7,84E-01 |
| <i>THC2415124</i>      | 1,03  | 5,49E-01 | 7,84E-01 |
| <i>PSD3</i>            | 1,05  | 5,49E-01 | 7,84E-01 |
| <i>UGCGL2</i>          | 1,02  | 5,49E-01 | 7,84E-01 |
| <i>THC2357608</i>      | 1,05  | 5,49E-01 | 7,84E-01 |
| <i>CASC4</i>           | 1,02  | 5,49E-01 | 7,84E-01 |
| <i>ENST00000359653</i> | -1,03 | 5,49E-01 | 7,84E-01 |
| <i>ENST00000332074</i> | 1,02  | 5,49E-01 | 7,84E-01 |
| <i>LOC254848</i>       | 1,02  | 5,49E-01 | 7,84E-01 |
| <i>SYT2</i>            | -1,02 | 5,49E-01 | 7,85E-01 |
| <i>LOC90342</i>        | -1,02 | 5,49E-01 | 7,85E-01 |
| <i>PSPN</i>            | 1,02  | 5,50E-01 | 7,85E-01 |
| <i>AK124978</i>        | 1,02  | 5,50E-01 | 7,85E-01 |
| <i>WBSCR16</i>         | -1,02 | 5,50E-01 | 7,85E-01 |
| <i>RPP21</i>           | -1,02 | 5,50E-01 | 7,85E-01 |
| <i>HAAO</i>            | -1,03 | 5,50E-01 | 7,85E-01 |
| <i>GTF2H5</i>          | -1,02 | 5,50E-01 | 7,85E-01 |
| <i>THC2447552</i>      | 1,03  | 5,50E-01 | 7,85E-01 |
| <i>TRIB3</i>           | -1,05 | 5,50E-01 | 7,85E-01 |
| <i>A_32_P154139</i>    | 1,02  | 5,50E-01 | 7,85E-01 |
| <i>AL109707</i>        | -1,02 | 5,50E-01 | 7,85E-01 |
| <i>AW138500</i>        | -1,02 | 5,50E-01 | 7,85E-01 |
| <i>AI801879</i>        | -1,02 | 5,50E-01 | 7,85E-01 |
| <i>ENST00000248076</i> | -1,02 | 5,50E-01 | 7,85E-01 |
| <i>MAP4K3</i>          | 1,02  | 5,50E-01 | 7,85E-01 |
| <i>ENST00000342888</i> | 1,03  | 5,50E-01 | 7,85E-01 |
| <i>FLJ25371</i>        | 1,04  | 5,50E-01 | 7,85E-01 |
| <i>LOC286434</i>       | -1,02 | 5,50E-01 | 7,85E-01 |
| <i>AK001405</i>        | -1,03 | 5,50E-01 | 7,85E-01 |
| <i>C9orf11</i>         | -1,04 | 5,51E-01 | 7,85E-01 |
| <i>BM997687</i>        | -1,03 | 5,50E-01 | 7,85E-01 |
| <i>THC2279497</i>      | -1,03 | 5,50E-01 | 7,85E-01 |
| <i>ENST00000339692</i> | -1,03 | 5,50E-01 | 7,85E-01 |



|                        |       |          |          |
|------------------------|-------|----------|----------|
| <i>THC2451747</i>      | -1,03 | 5,50E-01 | 7,85E-01 |
| <i>PERLD1</i>          | -1,02 | 5,50E-01 | 7,85E-01 |
| <i>D21S2056E</i>       | -1,02 | 5,51E-01 | 7,85E-01 |
| <i>OTP</i>             | -1,02 | 5,50E-01 | 7,85E-01 |
| <i>A_24_P919044</i>    | 1,02  | 5,50E-01 | 7,85E-01 |
| <i>CD2AP</i>           | 1,02  | 5,50E-01 | 7,85E-01 |
| <i>OLIG1</i>           | 1,02  | 5,51E-01 | 7,85E-01 |
| <i>THC2322184</i>      | 1,02  | 5,50E-01 | 7,85E-01 |
| <i>AF279782</i>        | 1,03  | 5,50E-01 | 7,85E-01 |
| <i>A_24_P332721</i>    | 1,03  | 5,51E-01 | 7,85E-01 |
| <i>PPP1R3A</i>         | 1,03  | 5,50E-01 | 7,85E-01 |
| <i>RPL22L1</i>         | 1,03  | 5,50E-01 | 7,85E-01 |
| <i>TTC7A</i>           | 1,03  | 5,51E-01 | 7,85E-01 |
| <i>A_24_P23454</i>     | 1,03  | 5,51E-01 | 7,85E-01 |
| <i>AF283771</i>        | 1,04  | 5,50E-01 | 7,85E-01 |
| <i>A_32_P152046</i>    | 1,04  | 5,50E-01 | 7,85E-01 |
| <i>PHPT1</i>           | 1,04  | 5,50E-01 | 7,85E-01 |
| <i>PPP2R4</i>          | -1,04 | 5,51E-01 | 7,85E-01 |
| <i>GJA3</i>            | -1,02 | 5,51E-01 | 7,85E-01 |
| <i>TAS2R7</i>          | 1,02  | 5,51E-01 | 7,85E-01 |
| <i>BC033989</i>        | 1,03  | 5,51E-01 | 7,85E-01 |
| <i>MARS</i>            | 1,03  | 5,51E-01 | 7,85E-01 |
| <i>RIMS4</i>           | -1,09 | 5,51E-01 | 7,85E-01 |
| <i>AK024455</i>        | 1,02  | 5,51E-01 | 7,85E-01 |
| <i>GABRR2</i>          | -1,02 | 5,51E-01 | 7,85E-01 |
| <i>OSAP</i>            | -1,09 | 5,51E-01 | 7,85E-01 |
| <i>CLEC1A</i>          | -1,03 | 5,51E-01 | 7,85E-01 |
| <i>ENST00000360741</i> | -1,03 | 5,51E-01 | 7,85E-01 |
| <i>ENST00000294915</i> | -1,02 | 5,51E-01 | 7,85E-01 |
| <i>KCNQ2</i>           | 1,02  | 5,51E-01 | 7,85E-01 |
| <i>FLJ40536</i>        | -1,03 | 5,51E-01 | 7,86E-01 |
| <i>ASXL1</i>           | 1,02  | 5,52E-01 | 7,86E-01 |
| <i>AOC2</i>            | 1,02  | 5,52E-01 | 7,86E-01 |
| <i>TTLL2</i>           | -1,02 | 5,52E-01 | 7,86E-01 |
| <i>AK095046</i>        | 1,03  | 5,52E-01 | 7,86E-01 |
| <i>FRK</i>             | 1,05  | 5,52E-01 | 7,86E-01 |
| <i>BC038719</i>        | -1,03 | 5,52E-01 | 7,86E-01 |
| <i>AL133018</i>        | 1,02  | 5,52E-01 | 7,86E-01 |
| <i>RPRM</i>            | -1,08 | 5,52E-01 | 7,86E-01 |
| <i>EXOSC5</i>          | 1,02  | 5,52E-01 | 7,86E-01 |
| <i>RRH</i>             | 1,03  | 5,52E-01 | 7,86E-01 |
| <i>THC2368205</i>      | -1,02 | 5,52E-01 | 7,86E-01 |
| <i>C1orf126</i>        | 1,02  | 5,52E-01 | 7,86E-01 |
| <i>A_32_P164637</i>    | 1,02  | 5,52E-01 | 7,86E-01 |

|                        |       |          |          |
|------------------------|-------|----------|----------|
| <i>ENST00000344339</i> | 1,03  | 5,52E-01 | 7,86E-01 |
| <i>ERBB2</i>           | 1,03  | 5,52E-01 | 7,86E-01 |
| <i>MASP1</i>           | 1,08  | 5,52E-01 | 7,86E-01 |
| <i>ETV1</i>            | -1,03 | 5,52E-01 | 7,86E-01 |
| <i>A_24_P384539</i>    | -1,03 | 5,52E-01 | 7,86E-01 |
| <i>LILRA3</i>          | -1,02 | 5,52E-01 | 7,86E-01 |
| <i>BM054818</i>        | 1,02  | 5,52E-01 | 7,86E-01 |
| <i>MTFMT</i>           | 1,02  | 5,52E-01 | 7,86E-01 |
| <i>C1orf187</i>        | 1,02  | 5,52E-01 | 7,86E-01 |
| <i>THC2369735</i>      | 1,08  | 5,52E-01 | 7,86E-01 |
| <i>AF130047</i>        | -1,02 | 5,52E-01 | 7,86E-01 |
| <i>CASP14</i>          | 1,02  | 5,53E-01 | 7,86E-01 |
| <i>ENST00000342951</i> | 1,03  | 5,53E-01 | 7,86E-01 |
| <i>PAEP</i>            | -1,02 | 5,53E-01 | 7,86E-01 |
| <i>TNK2</i>            | 1,02  | 5,53E-01 | 7,86E-01 |
| <i>OCM</i>             | 1,02  | 5,53E-01 | 7,86E-01 |
| <i>ENST00000382691</i> | 1,02  | 5,53E-01 | 7,86E-01 |
| <i>TPCN2</i>           | -1,03 | 5,53E-01 | 7,87E-01 |
| <i>A_24_P204135</i>    | -1,02 | 5,53E-01 | 7,87E-01 |
| <i>CEACAM20</i>        | 1,05  | 5,53E-01 | 7,87E-01 |
| <i>THC2447457</i>      | -1,04 | 5,53E-01 | 7,87E-01 |
| <i>A_32_P19616</i>     | -1,03 | 5,53E-01 | 7,87E-01 |
| <i>ZFAND1</i>          | -1,03 | 5,53E-01 | 7,87E-01 |
| <i>ZUBR1</i>           | -1,02 | 5,53E-01 | 7,87E-01 |
| <i>GABARAPL2</i>       | 1,02  | 5,53E-01 | 7,87E-01 |
| <i>A_24_P588578</i>    | 1,02  | 5,53E-01 | 7,87E-01 |
| <i>DTWD2</i>           | 1,03  | 5,53E-01 | 7,87E-01 |
| <i>CPB2</i>            | 1,03  | 5,53E-01 | 7,87E-01 |
| <i>NP164774</i>        | 1,03  | 5,53E-01 | 7,87E-01 |
| <i>THC2280475</i>      | 1,03  | 5,53E-01 | 7,87E-01 |
| <i>A_24_P230388</i>    | 1,06  | 5,53E-01 | 7,87E-01 |
| <i>A_24_P915105</i>    | 1,02  | 5,54E-01 | 7,87E-01 |
| <i>RGAG4</i>           | -1,04 | 5,54E-01 | 7,87E-01 |
| <i>LIPA</i>            | -1,03 | 5,54E-01 | 7,87E-01 |
| <i>LOC162427</i>       | -1,02 | 5,54E-01 | 7,87E-01 |
| <i>AY358732</i>        | 1,03  | 5,54E-01 | 7,87E-01 |
| <i>BCAS1</i>           | -1,13 | 5,54E-01 | 7,87E-01 |
| <i>HLA-DRB3</i>        | -1,04 | 5,54E-01 | 7,87E-01 |
| <i>BC030770</i>        | 1,03  | 5,54E-01 | 7,87E-01 |
| <i>SPRED1</i>          | 1,03  | 5,54E-01 | 7,87E-01 |
| <i>AT_ssH_GD_3</i>     | 1,06  | 5,54E-01 | 7,87E-01 |
| <i>C15orf34</i>        | -1,02 | 5,54E-01 | 7,87E-01 |
| <i>TTY11</i>           | 1,02  | 5,54E-01 | 7,87E-01 |
| <i>THC2405114</i>      | -1,02 | 5,54E-01 | 7,87E-01 |

|                        |       |          |          |
|------------------------|-------|----------|----------|
| <i>GOLPH3</i>          | -1,02 | 5,54E-01 | 7,88E-01 |
| <i>BMP2K</i>           | 1,02  | 5,54E-01 | 7,88E-01 |
| <i>TCEAL6</i>          | -1,03 | 5,54E-01 | 7,88E-01 |
| <i>COL11A2</i>         | 1,02  | 5,54E-01 | 7,88E-01 |
| <i>BC016947</i>        | 1,02  | 5,54E-01 | 7,88E-01 |
| <i>C9</i>              | 1,02  | 5,54E-01 | 7,88E-01 |
| <i>A_32_P30339</i>     | 1,04  | 5,55E-01 | 7,88E-01 |
| <i>A_24_P118591</i>    | -1,02 | 5,55E-01 | 7,88E-01 |
| <i>LOC646040</i>       | -1,03 | 5,55E-01 | 7,88E-01 |
| <i>SCUBE1</i>          | 1,03  | 5,55E-01 | 7,88E-01 |
| <i>A_32_P139400</i>    | 1,03  | 5,55E-01 | 7,88E-01 |
| <i>FAM54B</i>          | -1,03 | 5,55E-01 | 7,88E-01 |
| <i>PPP2R2A</i>         | -1,02 | 5,55E-01 | 7,88E-01 |
| <i>THC2342810</i>      | -1,04 | 5,55E-01 | 7,88E-01 |
| <i>LEPROT</i>          | -1,03 | 5,55E-01 | 7,88E-01 |
| <i>SF3B14</i>          | -1,02 | 5,55E-01 | 7,88E-01 |
| <i>DDX10</i>           | -1,02 | 5,55E-01 | 7,88E-01 |
| <i>EXO1</i>            | -1,01 | 5,55E-01 | 7,88E-01 |
| <i>ITGB4BP</i>         | 1,02  | 5,55E-01 | 7,88E-01 |
| <i>AY358802</i>        | 1,05  | 5,55E-01 | 7,88E-01 |
| <i>BC024198</i>        | 1,06  | 5,55E-01 | 7,88E-01 |
| <i>SERPINH1</i>        | 1,08  | 5,55E-01 | 7,88E-01 |
| <i>FLJ35834</i>        | -1,06 | 5,55E-01 | 7,88E-01 |
| <i>CR606271</i>        | -1,02 | 5,55E-01 | 7,88E-01 |
| <i>A_32_P149625</i>    | -1,02 | 5,55E-01 | 7,88E-01 |
| <i>ENTPD5</i>          | 1,01  | 5,55E-01 | 7,88E-01 |
| <i>FLJ36644</i>        | 1,02  | 5,55E-01 | 7,88E-01 |
| <i>A_32_P143530</i>    | 1,04  | 5,55E-01 | 7,88E-01 |
| <i>ANGPTL7</i>         | 1,13  | 5,55E-01 | 7,88E-01 |
| <i>FOXRED1</i>         | -1,02 | 5,56E-01 | 7,88E-01 |
| <i>NTAN1</i>           | -1,03 | 5,56E-01 | 7,88E-01 |
| <i>SNX25</i>           | -1,03 | 5,56E-01 | 7,88E-01 |
| <i>A_24_P882309</i>    | 1,03  | 5,56E-01 | 7,88E-01 |
| <i>ALAS2</i>           | 1,14  | 5,56E-01 | 7,88E-01 |
| <i>PSORS1C2</i>        | 1,05  | 5,56E-01 | 7,88E-01 |
| <i>ASPHD1</i>          | -1,09 | 5,56E-01 | 7,89E-01 |
| <i>A_24_P167059</i>    | -1,04 | 5,56E-01 | 7,89E-01 |
| <i>LRP4</i>            | -1,04 | 5,56E-01 | 7,89E-01 |
| <i>BX350430</i>        | 1,02  | 5,56E-01 | 7,89E-01 |
| <i>A_24_P255473</i>    | -1,02 | 5,56E-01 | 7,89E-01 |
| <i>THC2280741</i>      | -1,03 | 5,56E-01 | 7,89E-01 |
| <i>ENST00000333984</i> | -1,03 | 5,56E-01 | 7,89E-01 |
| <i>A_24_P496089</i>    | -1,03 | 5,56E-01 | 7,89E-01 |
| <i>RG9MTD1</i>         | -1,02 | 5,56E-01 | 7,89E-01 |

|                        |       |          |          |
|------------------------|-------|----------|----------|
| <i>AK021546</i>        | 1,03  | 5,56E-01 | 7,89E-01 |
| <i>TMEM51</i>          | -1,04 | 5,56E-01 | 7,89E-01 |
| <i>AW451975</i>        | -1,03 | 5,56E-01 | 7,89E-01 |
| <i>U22680</i>          | -1,02 | 5,56E-01 | 7,89E-01 |
| <i>MMP2</i>            | -1,07 | 5,57E-01 | 7,89E-01 |
| <i>CSF2RA</i>          | -1,04 | 5,57E-01 | 7,89E-01 |
| <i>CYB561D2</i>        | -1,03 | 5,57E-01 | 7,89E-01 |
| <i>SLC9A10</i>         | -1,02 | 5,57E-01 | 7,89E-01 |
| <i>CCDC27</i>          | 1,02  | 5,57E-01 | 7,89E-01 |
| <i>CXorf48</i>         | 1,02  | 5,57E-01 | 7,89E-01 |
| <i>THC2377863</i>      | 1,03  | 5,57E-01 | 7,89E-01 |
| <i>AF271256</i>        | 1,03  | 5,57E-01 | 7,89E-01 |
| <i>CENTB5</i>          | 1,04  | 5,57E-01 | 7,89E-01 |
| <i>ENST00000331807</i> | 1,03  | 5,57E-01 | 7,89E-01 |
| <i>A_24_P127425</i>    | -1,03 | 5,57E-01 | 7,89E-01 |
| <i>A_24_P212596</i>    | -1,03 | 5,57E-01 | 7,89E-01 |
| <i>THC2407032</i>      | -1,02 | 5,57E-01 | 7,89E-01 |
| <i>THC2340363</i>      | -1,02 | 5,57E-01 | 7,89E-01 |
| <i>AW138098</i>        | -1,02 | 5,57E-01 | 7,89E-01 |
| <i>OR1D2</i>           | 1,02  | 5,57E-01 | 7,89E-01 |
| <i>TNKS2</i>           | 1,02  | 5,57E-01 | 7,89E-01 |
| <i>DPPA3</i>           | 1,02  | 5,57E-01 | 7,89E-01 |
| <i>FLJ32252</i>        | 1,03  | 5,57E-01 | 7,89E-01 |
| <i>CK570365</i>        | 1,03  | 5,57E-01 | 7,89E-01 |
| <i>IDI2</i>            | 1,03  | 5,57E-01 | 7,89E-01 |
| <i>TRIP10</i>          | 1,03  | 5,57E-01 | 7,89E-01 |
| <i>REC8L1</i>          | 1,05  | 5,57E-01 | 7,89E-01 |
| <i>DLL1</i>            | 1,07  | 5,57E-01 | 7,89E-01 |
| <i>C17orf54</i>        | 1,02  | 5,57E-01 | 7,89E-01 |
| <i>THC2337493</i>      | 1,04  | 5,57E-01 | 7,89E-01 |
| <i>BQ050540</i>        | -1,02 | 5,57E-01 | 7,89E-01 |
| <i>APOL6</i>           | 1,03  | 5,57E-01 | 7,89E-01 |
| <i>DAPP1</i>           | -1,03 | 5,58E-01 | 7,89E-01 |
| <i>THC2390294</i>      | -1,02 | 5,58E-01 | 7,89E-01 |
| <i>BC066984</i>        | -1,02 | 5,58E-01 | 7,89E-01 |
| <i>RAC1</i>            | -1,02 | 5,58E-01 | 7,89E-01 |
| <i>AF233648</i>        | 1,02  | 5,58E-01 | 7,89E-01 |
| <i>PIWIL3</i>          | 1,02  | 5,58E-01 | 7,89E-01 |
| <i>A_24_P934289</i>    | 1,02  | 5,58E-01 | 7,89E-01 |
| <i>AU148207</i>        | 1,02  | 5,58E-01 | 7,89E-01 |
| <i>OXGR1</i>           | 1,03  | 5,58E-01 | 7,89E-01 |
| <i>OLFM2</i>           | -1,04 | 5,58E-01 | 7,89E-01 |
| <i>DMKN</i>            | -1,17 | 5,58E-01 | 7,89E-01 |
| <i>DIRAS1</i>          | -1,06 | 5,58E-01 | 7,89E-01 |

|                        |       |          |          |
|------------------------|-------|----------|----------|
| <i>GCGR</i>            | -1,03 | 5,58E-01 | 7,89E-01 |
| <i>STXBP2</i>          | -1,02 | 5,58E-01 | 7,89E-01 |
| <i>ZFAND6</i>          | 1,02  | 5,58E-01 | 7,89E-01 |
| <i>CMYA3</i>           | 1,01  | 5,58E-01 | 7,90E-01 |
| <i>THC2381210</i>      | -1,02 | 5,58E-01 | 7,90E-01 |
| <i>THC2284171</i>      | 1,02  | 5,58E-01 | 7,90E-01 |
| <i>TEKT2</i>           | 1,05  | 5,58E-01 | 7,90E-01 |
| <i>ZNF165</i>          | -1,03 | 5,58E-01 | 7,90E-01 |
| <i>KRTAP13-4</i>       | -1,02 | 5,58E-01 | 7,90E-01 |
| <i>AF119892</i>        | 1,02  | 5,58E-01 | 7,90E-01 |
| <i>KRTAP5-9</i>        | 1,03  | 5,58E-01 | 7,90E-01 |
| <i>SCARF1</i>          | 1,04  | 5,58E-01 | 7,90E-01 |
| <i>ENST00000372066</i> | 1,04  | 5,58E-01 | 7,90E-01 |
| <i>A_23_P21804</i>     | 1,03  | 5,58E-01 | 7,90E-01 |
| <i>A_24_P341593</i>    | -1,02 | 5,58E-01 | 7,90E-01 |
| <i>BM928667</i>        | -1,03 | 5,59E-01 | 7,90E-01 |
| <i>GNA12</i>           | -1,03 | 5,59E-01 | 7,90E-01 |
| <i>PTGES</i>           | 1,04  | 5,59E-01 | 7,90E-01 |
| <i>HADH2</i>           | -1,03 | 5,59E-01 | 7,90E-01 |
| <i>THC2334567</i>      | -1,04 | 5,59E-01 | 7,90E-01 |
| <i>BE243669</i>        | 1,02  | 5,59E-01 | 7,90E-01 |
| <i>ANXA2P3</i>         | 1,09  | 5,59E-01 | 7,90E-01 |
| <i>AP2A2</i>           | -1,02 | 5,59E-01 | 7,90E-01 |
| <i>MANBAL</i>          | 1,02  | 5,59E-01 | 7,90E-01 |
| <i>A_24_P943379</i>    | 1,02  | 5,59E-01 | 7,90E-01 |
| <i>LOC221711</i>       | -1,02 | 5,59E-01 | 7,90E-01 |
| <i>KRTAP4-10</i>       | 1,06  | 5,59E-01 | 7,90E-01 |
| <i>THC2273614</i>      | -1,03 | 5,59E-01 | 7,90E-01 |
| <i>SLC35C2</i>         | 1,02  | 5,59E-01 | 7,90E-01 |
| <i>A_24_P937402</i>    | 1,02  | 5,59E-01 | 7,90E-01 |
| <i>CA428801</i>        | -1,02 | 5,59E-01 | 7,90E-01 |
| <i>A_24_P169574</i>    | 1,03  | 5,59E-01 | 7,90E-01 |
| <i>LOC286260</i>       | 1,02  | 5,59E-01 | 7,91E-01 |
| <i>LOC401233</i>       | -1,09 | 5,59E-01 | 7,91E-01 |
| <i>A_24_P16361</i>     | -1,06 | 5,60E-01 | 7,91E-01 |
| <i>C15orf49</i>        | -1,02 | 5,60E-01 | 7,91E-01 |
| <i>AA151106</i>        | 1,02  | 5,60E-01 | 7,91E-01 |
| <i>DSCR2</i>           | 1,02  | 5,60E-01 | 7,91E-01 |
| <i>SLC44A5</i>         | 1,02  | 5,60E-01 | 7,91E-01 |
| <i>A_24_P118472</i>    | 1,03  | 5,60E-01 | 7,91E-01 |
| <i>A_32_P218079</i>    | -1,04 | 5,60E-01 | 7,91E-01 |
| <i>A_23_P40225</i>     | -1,03 | 5,60E-01 | 7,91E-01 |
| <i>THC2346010</i>      | -1,02 | 5,60E-01 | 7,91E-01 |
| <i>THC2282130</i>      | 1,02  | 5,60E-01 | 7,91E-01 |

|                        |       |          |          |
|------------------------|-------|----------|----------|
| <i>MGC43122</i>        | -1,08 | 5,60E-01 | 7,91E-01 |
| <i>FAM3A</i>           | 1,02  | 5,60E-01 | 7,91E-01 |
| <i>ENST00000374851</i> | -1,05 | 5,60E-01 | 7,91E-01 |
| <i>TMEM41B</i>         | -1,02 | 5,60E-01 | 7,91E-01 |
| <i>A_32_P223616</i>    | 1,02  | 5,60E-01 | 7,91E-01 |
| <i>AK124708</i>        | 1,02  | 5,60E-01 | 7,91E-01 |
| <i>ENST00000312008</i> | 1,02  | 5,60E-01 | 7,91E-01 |
| <i>A_32_P100452</i>    | 1,02  | 5,60E-01 | 7,91E-01 |
| <i>A_32_P34201</i>     | -1,04 | 5,61E-01 | 7,91E-01 |
| <i>THC2329863</i>      | 1,12  | 5,61E-01 | 7,91E-01 |
| <i>LEREPO4</i>         | -1,02 | 5,61E-01 | 7,91E-01 |
| <i>THC2344984</i>      | -1,02 | 5,61E-01 | 7,91E-01 |
| <i>GPD1L</i>           | -1,05 | 5,61E-01 | 7,92E-01 |
| <i>KIAA1654</i>        | -1,03 | 5,61E-01 | 7,92E-01 |
| <i>C3orf60</i>         | -1,02 | 5,61E-01 | 7,92E-01 |
| <i>HCG9</i>            | 1,02  | 5,61E-01 | 7,92E-01 |
| <i>PIP3-E</i>          | 1,02  | 5,61E-01 | 7,92E-01 |
| <i>THC2429853</i>      | -1,03 | 5,61E-01 | 7,92E-01 |
| <i>THC2397010</i>      | -1,04 | 5,61E-01 | 7,92E-01 |
| <i>RBM35A</i>          | 1,04  | 5,61E-01 | 7,92E-01 |
| <i>LIPG</i>            | 1,03  | 5,61E-01 | 7,92E-01 |
| <i>SLC7A8</i>          | 1,05  | 5,61E-01 | 7,92E-01 |
| <i>P2RX4</i>           | 1,02  | 5,61E-01 | 7,92E-01 |
| <i>NPPA</i>            | -1,03 | 5,61E-01 | 7,92E-01 |
| <i>NIBP</i>            | -1,03 | 5,61E-01 | 7,92E-01 |
| <i>AF251047</i>        | -1,02 | 5,61E-01 | 7,92E-01 |
| <i>PTPMT1</i>          | -1,02 | 5,61E-01 | 7,92E-01 |
| <i>S72604</i>          | 1,02  | 5,61E-01 | 7,92E-01 |
| <i>BC036431</i>        | 1,02  | 5,61E-01 | 7,92E-01 |
| <i>LOC650236</i>       | 1,02  | 5,61E-01 | 7,92E-01 |
| <i>THC2280109</i>      | 1,04  | 5,61E-01 | 7,92E-01 |
| <i>CLDN7</i>           | -1,03 | 5,62E-01 | 7,92E-01 |
| <i>ZNF20</i>           | -1,02 | 5,62E-01 | 7,92E-01 |
| <i>A_24_P922173</i>    | 1,02  | 5,62E-01 | 7,92E-01 |
| <i>C15orf26</i>        | 1,02  | 5,62E-01 | 7,92E-01 |
| <i>AY358245</i>        | 1,03  | 5,62E-01 | 7,92E-01 |
| <i>CHMP6</i>           | 1,02  | 5,62E-01 | 7,92E-01 |
| <i>A_24_P542489</i>    | 1,03  | 5,62E-01 | 7,92E-01 |
| <i>GFOD2</i>           | 1,03  | 5,62E-01 | 7,92E-01 |
| <i>KRT15</i>           | 1,19  | 5,62E-01 | 7,92E-01 |
| <i>ENST00000249480</i> | 1,02  | 5,62E-01 | 7,92E-01 |
| <i>FLOT2</i>           | 1,03  | 5,62E-01 | 7,92E-01 |
| <i>DEFB106A</i>        | 1,02  | 5,62E-01 | 7,93E-01 |
| <i>A_24_P538328</i>    | -1,03 | 5,63E-01 | 7,93E-01 |

|                        |       |          |          |
|------------------------|-------|----------|----------|
| <i>OR11H12</i>         | -1,03 | 5,63E-01 | 7,93E-01 |
| <i>A_24_P477475</i>    | -1,02 | 5,63E-01 | 7,93E-01 |
| <i>SCYE1</i>           | -1,01 | 5,62E-01 | 7,93E-01 |
| <i>ENST00000244062</i> | 1,02  | 5,63E-01 | 7,93E-01 |
| <i>SERPINA11</i>       | 1,02  | 5,62E-01 | 7,93E-01 |
| <i>KIAA0494</i>        | 1,02  | 5,63E-01 | 7,93E-01 |
| <i>CA431756</i>        | 1,02  | 5,63E-01 | 7,93E-01 |
| <i>EVI5L</i>           | 1,02  | 5,62E-01 | 7,93E-01 |
| <i>ENST00000309901</i> | 1,03  | 5,62E-01 | 7,93E-01 |
| <i>THC2312585</i>      | 1,04  | 5,62E-01 | 7,93E-01 |
| <i>MT4</i>             | 1,04  | 5,63E-01 | 7,93E-01 |
| <i>THC2446900</i>      | 1,06  | 5,62E-01 | 7,93E-01 |
| <i>ENST00000370290</i> | 1,06  | 5,63E-01 | 7,93E-01 |
| <i>APCDD1</i>          | 1,08  | 5,63E-01 | 7,93E-01 |
| <i>AA307830</i>        | -1,05 | 5,63E-01 | 7,93E-01 |
| <i>NRBP2</i>           | -1,02 | 5,63E-01 | 7,93E-01 |
| <i>FBXO17</i>          | -1,03 | 5,63E-01 | 7,93E-01 |
| <i>RAPGEF3</i>         | 1,03  | 5,63E-01 | 7,93E-01 |
| <i>ORC6L</i>           | -1,04 | 5,63E-01 | 7,93E-01 |
| <i>SLC9A5</i>          | -1,02 | 5,63E-01 | 7,93E-01 |
| <i>CIC</i>             | -1,02 | 5,63E-01 | 7,93E-01 |
| <i>KIAA1754L</i>       | 1,03  | 5,63E-01 | 7,93E-01 |
| <i>MTM1</i>            | 1,03  | 5,63E-01 | 7,93E-01 |
| <i>SPAG4L</i>          | 1,02  | 5,63E-01 | 7,93E-01 |
| <i>FLJ40722</i>        | -1,03 | 5,63E-01 | 7,93E-01 |
| <i>OTUD6B</i>          | 1,02  | 5,63E-01 | 7,93E-01 |
| <i>C3orf18</i>         | -1,04 | 5,63E-01 | 7,93E-01 |
| <i>SLC16A14</i>        | -1,04 | 5,63E-01 | 7,93E-01 |
| <i>TM7SF3</i>          | -1,03 | 5,63E-01 | 7,93E-01 |
| <i>LSM5</i>            | -1,02 | 5,63E-01 | 7,93E-01 |
| <i>AF038194</i>        | 1,02  | 5,63E-01 | 7,93E-01 |
| <i>CR605438</i>        | -1,02 | 5,64E-01 | 7,93E-01 |
| <i>FLJ46154</i>        | 1,02  | 5,64E-01 | 7,93E-01 |
| <i>LAPTM5</i>          | -1,04 | 5,64E-01 | 7,93E-01 |
| <i>PCDHGA9</i>         | -1,02 | 5,64E-01 | 7,93E-01 |
| <i>A_32_P146326</i>    | 1,03  | 5,64E-01 | 7,93E-01 |
| <i>THC2307560</i>      | 1,04  | 5,64E-01 | 7,93E-01 |
| <i>CCDC78</i>          | -1,05 | 5,64E-01 | 7,93E-01 |
| <i>IDH3G</i>           | 1,02  | 5,64E-01 | 7,93E-01 |
| <i>AF035291</i>        | 1,02  | 5,64E-01 | 7,93E-01 |
| <i>A_24_P323974</i>    | -1,06 | 5,64E-01 | 7,93E-01 |
| <i>DUSP13</i>          | -1,03 | 5,64E-01 | 7,93E-01 |
| <i>KIAA1600</i>        | 1,02  | 5,64E-01 | 7,93E-01 |
| <i>LOC283887</i>       | -1,02 | 5,64E-01 | 7,94E-01 |

|                        |       |          |          |
|------------------------|-------|----------|----------|
| <i>POLD3</i>           | -1,02 | 5,64E-01 | 7,94E-01 |
| <i>TM7SF2</i>          | -1,06 | 5,64E-01 | 7,94E-01 |
| <i>AK097954</i>        | -1,03 | 5,64E-01 | 7,94E-01 |
| <i>RPLPOP2</i>         | -1,02 | 5,64E-01 | 7,94E-01 |
| <i>A_24_P16086</i>     | 1,02  | 5,64E-01 | 7,94E-01 |
| <i>RMND5A</i>          | -1,02 | 5,64E-01 | 7,94E-01 |
| <i>HN1</i>             | -1,03 | 5,65E-01 | 7,94E-01 |
| <i>A_24_P935082</i>    | -1,03 | 5,65E-01 | 7,94E-01 |
| <i>PLA2G10</i>         | -1,02 | 5,65E-01 | 7,94E-01 |
| <i>PLSCR2</i>          | -1,02 | 5,65E-01 | 7,94E-01 |
| <i>TMEM135</i>         | 1,02  | 5,65E-01 | 7,94E-01 |
| <i>AU156529</i>        | 1,03  | 5,65E-01 | 7,94E-01 |
| <i>LOC653773</i>       | -1,03 | 5,65E-01 | 7,94E-01 |
| <i>THC2308689</i>      | 1,02  | 5,65E-01 | 7,94E-01 |
| <i>C1orf124</i>        | 1,04  | 5,65E-01 | 7,94E-01 |
| <i>C1orf110</i>        | 1,04  | 5,65E-01 | 7,94E-01 |
| <i>LTBP3</i>           | 1,04  | 5,65E-01 | 7,94E-01 |
| <i>CASC1</i>           | -1,03 | 5,65E-01 | 7,94E-01 |
| <i>AY239294</i>        | 1,03  | 5,65E-01 | 7,94E-01 |
| <i>AB034694</i>        | -1,02 | 5,65E-01 | 7,94E-01 |
| <i>ENST00000343158</i> | 1,02  | 5,65E-01 | 7,94E-01 |
| <i>CA946373</i>        | -1,06 | 5,65E-01 | 7,94E-01 |
| <i>C2orf19</i>         | -1,03 | 5,65E-01 | 7,94E-01 |
| <i>A_24_P187355</i>    | -1,02 | 5,65E-01 | 7,94E-01 |
| <i>MZF1</i>            | -1,02 | 5,65E-01 | 7,94E-01 |
| <i>CD300C</i>          | -1,02 | 5,65E-01 | 7,94E-01 |
| <i>DST</i>             | 1,04  | 5,65E-01 | 7,94E-01 |
| <i>BI062366</i>        | -1,03 | 5,65E-01 | 7,94E-01 |
| <i>LOC440356</i>       | -1,02 | 5,65E-01 | 7,94E-01 |
| <i>AY203961</i>        | -1,03 | 5,65E-01 | 7,94E-01 |
| <i>KIAA1598</i>        | -1,05 | 5,66E-01 | 7,95E-01 |
| <i>LOC339047</i>       | -1,02 | 5,66E-01 | 7,95E-01 |
| <i>CLDN17</i>          | -1,04 | 5,66E-01 | 7,95E-01 |
| <i>FLJ90579</i>        | 1,03  | 5,66E-01 | 7,95E-01 |
| <i>A_24_P914895</i>    | -1,03 | 5,66E-01 | 7,95E-01 |
| <i>SLC22A6</i>         | 1,03  | 5,66E-01 | 7,95E-01 |
| <i>TMEM141</i>         | -1,03 | 5,66E-01 | 7,95E-01 |
| <i>LOC440983</i>       | -1,02 | 5,66E-01 | 7,95E-01 |
| <i>ENST00000318934</i> | 1,03  | 5,66E-01 | 7,95E-01 |
| <i>TRIM35</i>          | 1,04  | 5,66E-01 | 7,95E-01 |
| <i>FLJ14816</i>        | -1,03 | 5,66E-01 | 7,95E-01 |
| <i>A_24_P817186</i>    | 1,02  | 5,66E-01 | 7,95E-01 |
| <i>NEDD4L</i>          | -1,04 | 5,66E-01 | 7,95E-01 |
| <i>PCNP</i>            | -1,03 | 5,66E-01 | 7,95E-01 |



|                        |       |          |          |
|------------------------|-------|----------|----------|
| <i>A_24_P466439</i>    | 1,02  | 5,66E-01 | 7,95E-01 |
| <i>K-ALPHA-1</i>       | 1,05  | 5,66E-01 | 7,95E-01 |
| <i>ENST00000369326</i> | -1,03 | 5,66E-01 | 7,95E-01 |
| <i>LOC646241</i>       | 1,03  | 5,67E-01 | 7,95E-01 |
| <i>MYST3</i>           | -1,02 | 5,67E-01 | 7,95E-01 |
| <i>UBE2L6</i>          | -1,03 | 5,67E-01 | 7,95E-01 |
| <i>HMGA2</i>           | 1,02  | 5,67E-01 | 7,95E-01 |
| <i>ENST00000333066</i> | 1,05  | 5,67E-01 | 7,95E-01 |
| <i>SMYD5</i>           | -1,04 | 5,67E-01 | 7,95E-01 |
| <i>DLG4</i>            | -1,02 | 5,67E-01 | 7,95E-01 |
| <i>PCMTD1</i>          | 1,03  | 5,67E-01 | 7,95E-01 |
| <i>ENST00000381827</i> | -1,08 | 5,67E-01 | 7,95E-01 |
| <i>CHMP5</i>           | -1,03 | 5,67E-01 | 7,96E-01 |
| <i>MED31</i>           | 1,02  | 5,67E-01 | 7,96E-01 |
| <i>LOC339760</i>       | 1,02  | 5,67E-01 | 7,96E-01 |
| <i>C10orf96</i>        | 1,02  | 5,67E-01 | 7,96E-01 |
| <i>KIAA0406</i>        | 1,02  | 5,67E-01 | 7,96E-01 |
| <i>AJ230821</i>        | -1,02 | 5,67E-01 | 7,96E-01 |
| <i>THC2411168</i>      | -1,02 | 5,67E-01 | 7,96E-01 |
| <i>K6HF</i>            | -1,09 | 5,67E-01 | 7,96E-01 |
| <i>ENST00000382378</i> | -1,02 | 5,67E-01 | 7,96E-01 |
| <i>RNF7</i>            | -1,02 | 5,67E-01 | 7,96E-01 |
| <i>BC056907</i>        | 1,01  | 5,67E-01 | 7,96E-01 |
| <i>LOC644005</i>       | 1,02  | 5,67E-01 | 7,96E-01 |
| <i>TRIP11</i>          | 1,02  | 5,67E-01 | 7,96E-01 |
| <i>GUCY2D</i>          | 1,02  | 5,67E-01 | 7,96E-01 |
| <i>C11orf73</i>        | 1,02  | 5,67E-01 | 7,96E-01 |
| <i>NM_173524</i>       | 1,02  | 5,68E-01 | 7,96E-01 |
| <i>C14orf152</i>       | 1,02  | 5,68E-01 | 7,96E-01 |
| <i>BM504117</i>        | 1,02  | 5,67E-01 | 7,96E-01 |
| <i>FLJ22671</i>        | -1,08 | 5,68E-01 | 7,96E-01 |
| <i>NXF5</i>            | 1,02  | 5,68E-01 | 7,96E-01 |
| <i>BX100523</i>        | 1,03  | 5,68E-01 | 7,96E-01 |
| <i>A_24_P365349</i>    | 1,03  | 5,68E-01 | 7,96E-01 |
| <i>CALR</i>            | -1,03 | 5,68E-01 | 7,96E-01 |
| <i>NUDT16P</i>         | -1,02 | 5,68E-01 | 7,96E-01 |
| <i>CASD1</i>           | -1,02 | 5,68E-01 | 7,96E-01 |
| <i>A_24_P922532</i>    | 1,02  | 5,68E-01 | 7,96E-01 |
| <i>THC2338813</i>      | -1,11 | 5,68E-01 | 7,96E-01 |
| <i>RP13-36C9.6</i>     | 1,02  | 5,68E-01 | 7,96E-01 |
| <i>RHBDF1</i>          | 1,04  | 5,68E-01 | 7,96E-01 |
| <i>BC019356</i>        | -1,02 | 5,68E-01 | 7,96E-01 |
| <i>INE1</i>            | -1,06 | 5,68E-01 | 7,96E-01 |
| <i>IL15RA</i>          | -1,04 | 5,68E-01 | 7,96E-01 |

|                        |       |          |          |
|------------------------|-------|----------|----------|
| <i>THC2298931</i>      | -1,03 | 5,68E-01 | 7,96E-01 |
| <i>SEC22B</i>          | -1,03 | 5,68E-01 | 7,96E-01 |
| <i>BE328135</i>        | -1,03 | 5,68E-01 | 7,96E-01 |
| <i>THC2438039</i>      | -1,03 | 5,68E-01 | 7,96E-01 |
| <i>SPTBN4</i>          | -1,02 | 5,68E-01 | 7,96E-01 |
| <i>VN1R4</i>           | -1,02 | 5,68E-01 | 7,96E-01 |
| <i>VDAC3</i>           | -1,02 | 5,68E-01 | 7,96E-01 |
| <i>ZNF335</i>          | -1,02 | 5,68E-01 | 7,96E-01 |
| <i>THC2234278</i>      | 1,02  | 5,68E-01 | 7,96E-01 |
| <i>APOA4</i>           | 1,02  | 5,69E-01 | 7,96E-01 |
| <i>PIK3C2G</i>         | 1,02  | 5,68E-01 | 7,96E-01 |
| <i>ASAH2</i>           | 1,02  | 5,68E-01 | 7,96E-01 |
| <i>FAM111B</i>         | 1,03  | 5,68E-01 | 7,96E-01 |
| <i>MAGI2</i>           | 1,05  | 5,68E-01 | 7,96E-01 |
| <i>LOC283174</i>       | 1,07  | 5,68E-01 | 7,96E-01 |
| <i>A_23_P421323</i>    | 1,08  | 5,68E-01 | 7,96E-01 |
| <i>CYP2C8</i>          | -1,02 | 5,69E-01 | 7,96E-01 |
| <i>TANC1</i>           | 1,03  | 5,69E-01 | 7,96E-01 |
| <i>A_24_P928819</i>    | 1,08  | 5,69E-01 | 7,96E-01 |
| <i>A_24_P911746</i>    | -1,02 | 5,69E-01 | 7,96E-01 |
| <i>ENST00000327781</i> | 1,02  | 5,69E-01 | 7,96E-01 |
| <i>CHGA</i>            | 1,02  | 5,69E-01 | 7,96E-01 |
| <i>WDR45L</i>          | -1,02 | 5,69E-01 | 7,96E-01 |
| <i>BM924037</i>        | -1,02 | 5,69E-01 | 7,96E-01 |
| <i>HOXD12</i>          | 1,02  | 5,69E-01 | 7,96E-01 |
| <i>A_32_P162443</i>    | 1,02  | 5,69E-01 | 7,97E-01 |
| <i>AKO26517</i>        | -1,18 | 5,69E-01 | 7,97E-01 |
| <i>IQSEC2</i>          | 1,03  | 5,69E-01 | 7,97E-01 |
| <i>A_24_P212997</i>    | -1,03 | 5,69E-01 | 7,97E-01 |
| <i>WDR18</i>           | 1,02  | 5,69E-01 | 7,97E-01 |
| <i>A_32_P76122</i>     | -1,03 | 5,69E-01 | 7,97E-01 |
| <i>WHDC1L1</i>         | -1,02 | 5,69E-01 | 7,97E-01 |
| <i>LGALS2</i>          | -1,10 | 5,70E-01 | 7,97E-01 |
| <i>THC2343043</i>      | -1,03 | 5,69E-01 | 7,97E-01 |
| <i>TBCE</i>            | -1,02 | 5,70E-01 | 7,97E-01 |
| <i>ZP2</i>             | -1,02 | 5,70E-01 | 7,97E-01 |
| <i>A_24_P920468</i>    | 1,02  | 5,70E-01 | 7,97E-01 |
| <i>A_32_P164061</i>    | 1,02  | 5,70E-01 | 7,97E-01 |
| <i>BU733098</i>        | 1,02  | 5,70E-01 | 7,97E-01 |
| <i>THC2306968</i>      | 1,03  | 5,70E-01 | 7,97E-01 |
| <i>KRTAP2-4</i>        | 1,04  | 5,70E-01 | 7,97E-01 |
| <i>TNXB</i>            | 1,04  | 5,70E-01 | 7,97E-01 |
| <i>TLR4</i>            | 1,03  | 5,70E-01 | 7,97E-01 |
| <i>ZMYM6</i>           | -1,03 | 5,70E-01 | 7,97E-01 |

|                 |       |          |          |
|-----------------|-------|----------|----------|
| THC2284956      | 1,02  | 5,70E-01 | 7,97E-01 |
| GLT25D2         | 1,08  | 5,70E-01 | 7,97E-01 |
| ENST00000361241 | -1,02 | 5,70E-01 | 7,97E-01 |
| THC2341790      | -1,02 | 5,70E-01 | 7,97E-01 |
| INADL           | 1,02  | 5,70E-01 | 7,97E-01 |
| AJ295984        | 1,03  | 5,70E-01 | 7,97E-01 |
| MTHFD2          | 1,04  | 5,70E-01 | 7,97E-01 |
| ZNF569          | -1,03 | 5,70E-01 | 7,97E-01 |
| C19orf48        | -1,02 | 5,70E-01 | 7,97E-01 |
| AW663344        | -1,02 | 5,71E-01 | 7,97E-01 |
| ZC3HAV1         | 1,02  | 5,71E-01 | 7,97E-01 |
| A_24_P917306    | 1,03  | 5,71E-01 | 7,98E-01 |
| THC2337994      | 1,03  | 5,71E-01 | 7,98E-01 |
| LRRC50          | -1,02 | 5,71E-01 | 7,98E-01 |
| CPO             | 1,02  | 5,71E-01 | 7,98E-01 |
| ANKMY1          | -1,02 | 5,71E-01 | 7,98E-01 |
| GNA13           | 1,02  | 5,71E-01 | 7,98E-01 |
| HBG1            | 1,17  | 5,71E-01 | 7,98E-01 |
| ADARB2          | -1,04 | 5,71E-01 | 7,98E-01 |
| A_24_P298835    | -1,03 | 5,71E-01 | 7,98E-01 |
| ENST00000303598 | -1,02 | 5,71E-01 | 7,98E-01 |
| BC106900        | -1,02 | 5,71E-01 | 7,98E-01 |
| FLJ25530        | 1,02  | 5,71E-01 | 7,98E-01 |
| LOC348021       | -1,03 | 5,71E-01 | 7,98E-01 |
| C1QDC2          | -1,03 | 5,72E-01 | 7,98E-01 |
| ENST00000368025 | -1,06 | 5,72E-01 | 7,98E-01 |
| ENST00000332432 | 1,02  | 5,72E-01 | 7,98E-01 |
| THC2432288      | -1,04 | 5,72E-01 | 7,99E-01 |
| EPN2            | -1,03 | 5,72E-01 | 7,99E-01 |
| NT5C3           | -1,03 | 5,72E-01 | 7,99E-01 |
| ENST00000382355 | -1,03 | 5,72E-01 | 7,99E-01 |
| THC2301043      | -1,02 | 5,72E-01 | 7,99E-01 |
| ASCC1           | -1,02 | 5,72E-01 | 7,99E-01 |
| AY047582        | -1,02 | 5,72E-01 | 7,99E-01 |
| ITGB6           | -1,02 | 5,72E-01 | 7,99E-01 |
| A_24_P818378    | 1,02  | 5,72E-01 | 7,99E-01 |
| FLJ20489        | 1,02  | 5,72E-01 | 7,99E-01 |
| RAB6B           | 1,03  | 5,72E-01 | 7,99E-01 |
| HMGCS1          | 1,04  | 5,72E-01 | 7,99E-01 |
| PAPPA           | 1,04  | 5,72E-01 | 7,99E-01 |
| LOC652408       | 1,09  | 5,72E-01 | 7,99E-01 |
| PDIA6           | -1,03 | 5,72E-01 | 7,99E-01 |
| DEPDC7          | -1,04 | 5,72E-01 | 7,99E-01 |
| CYBA            | -1,03 | 5,72E-01 | 7,99E-01 |

|                        |       |          |          |
|------------------------|-------|----------|----------|
| <i>THC2386372</i>      | -1,02 | 5,72E-01 | 7,99E-01 |
| <i>E1A_r60_a107</i>    | 1,15  | 5,72E-01 | 7,99E-01 |
| <i>PLCL2</i>           | 1,03  | 5,72E-01 | 7,99E-01 |
| <i>PI3</i>             | -1,19 | 5,73E-01 | 7,99E-01 |
| <i>ENST00000330490</i> | -1,05 | 5,73E-01 | 7,99E-01 |
| <i>CACNA1C</i>         | -1,04 | 5,73E-01 | 7,99E-01 |
| <i>TMEM154</i>         | -1,04 | 5,73E-01 | 7,99E-01 |
| <i>ENST00000311201</i> | -1,02 | 5,73E-01 | 7,99E-01 |
| <i>AK090481</i>        | -1,02 | 5,73E-01 | 7,99E-01 |
| <i>ALS2CR11</i>        | -1,02 | 5,73E-01 | 7,99E-01 |
| <i>AY007124</i>        | -1,02 | 5,72E-01 | 7,99E-01 |
| <i>OSIL</i>            | -1,02 | 5,72E-01 | 7,99E-01 |
| <i>THC2446439</i>      | -1,02 | 5,73E-01 | 7,99E-01 |
| <i>PHC2</i>            | 1,02  | 5,72E-01 | 7,99E-01 |
| <i>THC2285086</i>      | 1,02  | 5,73E-01 | 7,99E-01 |
| <i>USH1G</i>           | 1,02  | 5,73E-01 | 7,99E-01 |
| <i>FLJ34690</i>        | 1,02  | 5,73E-01 | 7,99E-01 |
| <i>A_24_P366644</i>    | 1,02  | 5,73E-01 | 7,99E-01 |
| <i>AK092594</i>        | 1,02  | 5,73E-01 | 7,99E-01 |
| <i>THC2345075</i>      | 1,02  | 5,73E-01 | 7,99E-01 |
| <i>PGLYRP1</i>         | 1,02  | 5,73E-01 | 7,99E-01 |
| <i>RASA2</i>           | 1,02  | 5,73E-01 | 7,99E-01 |
| <i>MTMR2</i>           | 1,03  | 5,73E-01 | 7,99E-01 |
| <i>THC2438245</i>      | 1,03  | 5,73E-01 | 7,99E-01 |
| <i>AP1M2</i>           | 1,03  | 5,73E-01 | 7,99E-01 |
| <i>PTBP1</i>           | 1,03  | 5,73E-01 | 7,99E-01 |
| <i>ABCB1</i>           | 1,05  | 5,73E-01 | 7,99E-01 |
| <i>KRT5</i>            | 1,27  | 5,73E-01 | 7,99E-01 |
| <i>FAM86B1</i>         | -1,03 | 5,73E-01 | 7,99E-01 |
| <i>A_24_P118422</i>    | -1,03 | 5,73E-01 | 7,99E-01 |
| <i>TTC27</i>           | -1,02 | 5,73E-01 | 7,99E-01 |
| <i>AK026367</i>        | 1,03  | 5,73E-01 | 7,99E-01 |
| <i>AF251048</i>        | -1,03 | 5,73E-01 | 7,99E-01 |
| <i>A_24_P789842</i>    | -1,03 | 5,73E-01 | 7,99E-01 |
| <i>AA291137</i>        | -1,03 | 5,73E-01 | 7,99E-01 |
| <i>ELA3B</i>           | -1,03 | 5,73E-01 | 7,99E-01 |
| <i>SLC35C1</i>         | -1,02 | 5,74E-01 | 7,99E-01 |
| <i>RAG1</i>            | -1,02 | 5,74E-01 | 7,99E-01 |
| <i>MMAB</i>            | -1,03 | 5,74E-01 | 7,99E-01 |
| <i>BCAP31</i>          | 1,02  | 5,74E-01 | 7,99E-01 |
| <i>AK024938</i>        | -1,03 | 5,74E-01 | 7,99E-01 |
| <i>LOC349196</i>       | -1,02 | 5,74E-01 | 7,99E-01 |
| <i>PJCG6</i>           | -1,02 | 5,74E-01 | 7,99E-01 |
| <i>C1orf172</i>        | -1,07 | 5,74E-01 | 8,00E-01 |

|                        |       |          |          |
|------------------------|-------|----------|----------|
| <i>BC042737</i>        | 1,02  | 5,74E-01 | 8,00E-01 |
| <i>AI857589</i>        | 1,02  | 5,74E-01 | 8,00E-01 |
| <i>H12329</i>          | 1,05  | 5,74E-01 | 8,00E-01 |
| <i>BF813638</i>        | -1,02 | 5,74E-01 | 8,00E-01 |
| <i>DEFB126</i>         | -1,02 | 5,74E-01 | 8,00E-01 |
| <i>LOC93343</i>        | 1,02  | 5,74E-01 | 8,00E-01 |
| <i>THC2308977</i>      | 1,02  | 5,74E-01 | 8,00E-01 |
| <i>CAMKV</i>           | 1,02  | 5,74E-01 | 8,00E-01 |
| <i>NAP1L4</i>          | 1,02  | 5,74E-01 | 8,00E-01 |
| <i>SNX5</i>            | -1,02 | 5,75E-01 | 8,00E-01 |
| <i>SEMA6D</i>          | -1,04 | 5,75E-01 | 8,00E-01 |
| <i>CACNA1D</i>         | -1,02 | 5,75E-01 | 8,00E-01 |
| <i>BC029602</i>        | -1,02 | 5,75E-01 | 8,00E-01 |
| <i>IQSEC3</i>          | 1,02  | 5,75E-01 | 8,00E-01 |
| <i>A_24_P92661</i>     | -1,04 | 5,75E-01 | 8,00E-01 |
| <i>DLX1</i>            | 1,03  | 5,75E-01 | 8,00E-01 |
| <i>A_24_P144337</i>    | 1,04  | 5,75E-01 | 8,00E-01 |
| <i>BX538248</i>        | 1,03  | 5,75E-01 | 8,00E-01 |
| <i>ENST00000379053</i> | -1,03 | 5,75E-01 | 8,00E-01 |
| <i>AIM1L</i>           | -1,09 | 5,75E-01 | 8,00E-01 |
| <i>LOC389207</i>       | -1,02 | 5,75E-01 | 8,00E-01 |
| <i>ANKDD1A</i>         | -1,03 | 5,75E-01 | 8,00E-01 |
| <i>L09234</i>          | 1,02  | 5,75E-01 | 8,01E-01 |
| <i>SETD7</i>           | -1,02 | 5,75E-01 | 8,01E-01 |
| <i>A_24_P931932</i>    | -1,03 | 5,76E-01 | 8,01E-01 |
| <i>A_24_P109711</i>    | 1,02  | 5,75E-01 | 8,01E-01 |
| <i>FFAR2</i>           | 1,02  | 5,76E-01 | 8,01E-01 |
| <i>RAB33A</i>          | 1,04  | 5,76E-01 | 8,01E-01 |
| <i>A_24_P298946</i>    | 1,06  | 5,76E-01 | 8,01E-01 |
| <i>KLK13</i>           | -1,10 | 5,76E-01 | 8,01E-01 |
| <i>CYP1A2</i>          | -1,04 | 5,76E-01 | 8,01E-01 |
| <i>C18orf4</i>         | -1,03 | 5,76E-01 | 8,01E-01 |
| <i>THC2377679</i>      | -1,03 | 5,76E-01 | 8,01E-01 |
| <i>A_24_P926115</i>    | -1,03 | 5,76E-01 | 8,01E-01 |
| <i>APOE</i>            | 1,14  | 5,76E-01 | 8,01E-01 |
| <i>AK092807</i>        | -1,03 | 5,76E-01 | 8,01E-01 |
| <i>ENST00000355503</i> | -1,03 | 5,76E-01 | 8,01E-01 |
| <i>KIAA1919</i>        | -1,02 | 5,76E-01 | 8,01E-01 |
| <i>KIAA0404</i>        | 1,02  | 5,76E-01 | 8,01E-01 |
| <i>LOC342900</i>       | 1,04  | 5,76E-01 | 8,01E-01 |
| <i>C19orf44</i>        | 1,03  | 5,76E-01 | 8,01E-01 |
| <i>LOC388114</i>       | 1,04  | 5,76E-01 | 8,01E-01 |
| <i>A_24_P922401</i>    | -1,02 | 5,76E-01 | 8,01E-01 |
| <i>RBL1</i>            | 1,02  | 5,76E-01 | 8,01E-01 |

|                        |       |          |          |
|------------------------|-------|----------|----------|
| <i>AOF1</i>            | -1,02 | 5,76E-01 | 8,01E-01 |
| <i>CENTD1</i>          | -1,04 | 5,76E-01 | 8,01E-01 |
| <i>GLIPR1L2</i>        | -1,04 | 5,77E-01 | 8,01E-01 |
| <i>AK092349</i>        | -1,03 | 5,77E-01 | 8,01E-01 |
| <i>BX096418</i>        | -1,02 | 5,77E-01 | 8,01E-01 |
| <i>A_24_P349648</i>    | 1,02  | 5,77E-01 | 8,01E-01 |
| <i>OR5AP2</i>          | 1,03  | 5,77E-01 | 8,01E-01 |
| <i>LCE1A</i>           | 1,04  | 5,77E-01 | 8,01E-01 |
| <i>PGD</i>             | 1,04  | 5,77E-01 | 8,01E-01 |
| <i>AK023380</i>        | -1,02 | 5,77E-01 | 8,01E-01 |
| <i>KCNMB2</i>          | -1,07 | 5,77E-01 | 8,02E-01 |
| <i>PLEKHA2</i>         | -1,03 | 5,77E-01 | 8,02E-01 |
| <i>WWP1</i>            | 1,02  | 5,77E-01 | 8,02E-01 |
| <i>DDX48</i>           | 1,03  | 5,77E-01 | 8,02E-01 |
| <i>NEUROG1</i>         | 1,07  | 5,77E-01 | 8,02E-01 |
| <i>PALM2</i>           | 1,02  | 5,77E-01 | 8,02E-01 |
| <i>HDAC3</i>           | -1,02 | 5,77E-01 | 8,02E-01 |
| <i>PTGER4</i>          | -1,06 | 5,77E-01 | 8,02E-01 |
| <i>RC1</i>             | 1,01  | 5,77E-01 | 8,02E-01 |
| <i>ENST00000369722</i> | 1,03  | 5,77E-01 | 8,02E-01 |
| <i>CRB1</i>            | -1,03 | 5,77E-01 | 8,02E-01 |
| <i>OR51B4</i>          | -1,02 | 5,77E-01 | 8,02E-01 |
| <i>LOC286071</i>       | -1,02 | 5,77E-01 | 8,02E-01 |
| <i>BF433885</i>        | 1,03  | 5,78E-01 | 8,02E-01 |
| <i>PRKD1</i>           | 1,04  | 5,78E-01 | 8,02E-01 |
| <i>AA928090</i>        | 1,02  | 5,78E-01 | 8,02E-01 |
| <i>SRD5A2L</i>         | 1,03  | 5,78E-01 | 8,02E-01 |
| <i>ENST00000323013</i> | -1,03 | 5,78E-01 | 8,02E-01 |
| <i>TCEB2</i>           | 1,02  | 5,78E-01 | 8,02E-01 |
| <i>AMAC1</i>           | 1,02  | 5,78E-01 | 8,02E-01 |
| <i>THC2314039</i>      | 1,03  | 5,78E-01 | 8,02E-01 |
| <i>Y10152</i>          | 1,07  | 5,78E-01 | 8,02E-01 |
| <i>DR1</i>             | 1,01  | 5,78E-01 | 8,02E-01 |
| <i>LCE3E</i>           | 1,03  | 5,78E-01 | 8,02E-01 |
| <i>TMSB10</i>          | 1,04  | 5,78E-01 | 8,03E-01 |
| <i>TSPAN7</i>          | 1,04  | 5,78E-01 | 8,03E-01 |
| <i>ADPRHL2</i>         | -1,02 | 5,78E-01 | 8,03E-01 |
| <i>CHD6</i>            | -1,02 | 5,78E-01 | 8,03E-01 |
| <i>PAPSS2</i>          | -1,07 | 5,79E-01 | 8,03E-01 |
| <i>SCARB1</i>          | -1,04 | 5,79E-01 | 8,03E-01 |
| <i>ENST00000298249</i> | -1,03 | 5,79E-01 | 8,03E-01 |
| <i>AMELY</i>           | -1,02 | 5,79E-01 | 8,03E-01 |
| <i>GUK1</i>            | 1,03  | 5,79E-01 | 8,03E-01 |
| <i>UGDH</i>            | 1,03  | 5,79E-01 | 8,03E-01 |

|                        |       |          |          |
|------------------------|-------|----------|----------|
| <i>HBQ1</i>            | 1,11  | 5,79E-01 | 8,03E-01 |
| <i>OR7A17</i>          | 1,03  | 5,79E-01 | 8,03E-01 |
| <i>A_24_P607195</i>    | -1,02 | 5,79E-01 | 8,03E-01 |
| <i>A_32_P22578</i>     | 1,02  | 5,79E-01 | 8,03E-01 |
| <i>ENST00000334165</i> | 1,02  | 5,79E-01 | 8,03E-01 |
| <i>CSF3R</i>           | -1,04 | 5,79E-01 | 8,03E-01 |
| <i>AK127374</i>        | -1,02 | 5,79E-01 | 8,03E-01 |
| <i>LOC57149</i>        | -1,03 | 5,79E-01 | 8,03E-01 |
| <i>MGC34800</i>        | 1,06  | 5,79E-01 | 8,03E-01 |
| <i>LOC645208</i>       | 1,02  | 5,79E-01 | 8,03E-01 |
| <i>FLJ21408</i>        | -1,02 | 5,79E-01 | 8,03E-01 |
| <i>A_32_P183451</i>    | -1,02 | 5,79E-01 | 8,03E-01 |
| <i>PPP1R14B</i>        | 1,04  | 5,79E-01 | 8,03E-01 |
| <i>PRSS21</i>          | 1,02  | 5,79E-01 | 8,03E-01 |
| <i>PRAF2</i>           | -1,04 | 5,79E-01 | 8,03E-01 |
| <i>ENST00000377361</i> | -1,03 | 5,80E-01 | 8,03E-01 |
| <i>AI650707</i>        | 1,03  | 5,79E-01 | 8,03E-01 |
| <i>A_24_P871726</i>    | 1,03  | 5,80E-01 | 8,04E-01 |
| <i>THC2263272</i>      | -1,02 | 5,80E-01 | 8,04E-01 |
| <i>AT_L_3</i>          | 1,01  | 5,80E-01 | 8,04E-01 |
| <i>SLC35B4</i>         | 1,02  | 5,80E-01 | 8,04E-01 |
| <i>ENST00000379192</i> | -1,03 | 5,80E-01 | 8,04E-01 |
| <i>EFNA3</i>           | -1,03 | 5,80E-01 | 8,04E-01 |
| <i>BC010870</i>        | -1,03 | 5,80E-01 | 8,04E-01 |
| <i>AI079353</i>        | -1,03 | 5,80E-01 | 8,04E-01 |
| <i>GRWD1</i>           | -1,02 | 5,80E-01 | 8,04E-01 |
| <i>AK127156</i>        | 1,02  | 5,80E-01 | 8,04E-01 |
| <i>ARID4A</i>          | 1,02  | 5,80E-01 | 8,04E-01 |
| <i>THC2428014</i>      | 1,02  | 5,80E-01 | 8,04E-01 |
| <i>UBE4B</i>           | 1,02  | 5,80E-01 | 8,04E-01 |
| <i>A_32_P154112</i>    | 1,03  | 5,80E-01 | 8,04E-01 |
| <i>THC2369621</i>      | -1,03 | 5,80E-01 | 8,04E-01 |
| <i>D90075</i>          | 1,02  | 5,80E-01 | 8,04E-01 |
| <i>ENST00000382832</i> | -1,02 | 5,80E-01 | 8,04E-01 |
| <i>THC2413455</i>      | -1,02 | 5,80E-01 | 8,04E-01 |
| <i>CACNG3</i>          | 1,01  | 5,80E-01 | 8,04E-01 |
| <i>AI803208</i>        | 1,02  | 5,80E-01 | 8,04E-01 |
| <i>AL110189</i>        | 1,02  | 5,80E-01 | 8,04E-01 |
| <i>FLJ36000</i>        | -1,02 | 5,80E-01 | 8,04E-01 |
| <i>AW751256</i>        | 1,03  | 5,80E-01 | 8,04E-01 |
| <i>PEX11G</i>          | 1,02  | 5,80E-01 | 8,04E-01 |
| <i>AA490192</i>        | 1,03  | 5,80E-01 | 8,04E-01 |
| <i>THC2315389</i>      | -1,03 | 5,81E-01 | 8,04E-01 |
| <i>UBE2O</i>           | -1,02 | 5,81E-01 | 8,04E-01 |

|                 |       |          |          |
|-----------------|-------|----------|----------|
| AK127626        | 1,03  | 5,81E-01 | 8,04E-01 |
| CR601835        | 1,03  | 5,81E-01 | 8,04E-01 |
| NDUFB6          | 1,02  | 5,81E-01 | 8,04E-01 |
| A_24_P930705    | 1,03  | 5,81E-01 | 8,04E-01 |
| BCAR4           | -1,03 | 5,81E-01 | 8,04E-01 |
| PCBD1           | -1,02 | 5,81E-01 | 8,04E-01 |
| PXMP4           | -1,02 | 5,81E-01 | 8,04E-01 |
| A_23_P5512      | -1,03 | 5,81E-01 | 8,04E-01 |
| AYTL2           | 1,02  | 5,81E-01 | 8,04E-01 |
| C1orf159        | 1,02  | 5,81E-01 | 8,04E-01 |
| SOX2            | 1,09  | 5,81E-01 | 8,04E-01 |
| GOLGA4          | 1,02  | 5,81E-01 | 8,05E-01 |
| ENST00000369216 | -1,02 | 5,81E-01 | 8,05E-01 |
| MGST2           | 1,03  | 5,81E-01 | 8,05E-01 |
| IL17RD          | -1,04 | 5,82E-01 | 8,05E-01 |
| PRDM13          | -1,03 | 5,82E-01 | 8,05E-01 |
| LOC400084       | -1,02 | 5,82E-01 | 8,05E-01 |
| KCNG2           | 1,02  | 5,82E-01 | 8,05E-01 |
| NGB             | -1,02 | 5,82E-01 | 8,05E-01 |
| LOC284801       | 1,02  | 5,82E-01 | 8,05E-01 |
| LRRC3B          | -1,05 | 5,82E-01 | 8,05E-01 |
| BG547557        | -1,04 | 5,82E-01 | 8,05E-01 |
| GRIK3           | 1,03  | 5,82E-01 | 8,05E-01 |
| MID1IP1         | 1,03  | 5,82E-01 | 8,05E-01 |
| EN2             | 1,04  | 5,82E-01 | 8,05E-01 |
| CLDN10          | 1,05  | 5,82E-01 | 8,05E-01 |
| CACNG1          | 1,02  | 5,82E-01 | 8,05E-01 |
| ENST00000257897 | -1,03 | 5,82E-01 | 8,05E-01 |
| PRKAG1          | 1,02  | 5,82E-01 | 8,05E-01 |
| ENST00000297544 | 1,05  | 5,82E-01 | 8,05E-01 |
| LDHB            | -1,02 | 5,82E-01 | 8,05E-01 |
| AF305820        | 1,02  | 5,82E-01 | 8,05E-01 |
| A_24_P7541      | -1,02 | 5,83E-01 | 8,05E-01 |
| TTY5            | -1,02 | 5,83E-01 | 8,06E-01 |
| RMND5B          | -1,02 | 5,83E-01 | 8,06E-01 |
| GP1BA           | -1,02 | 5,83E-01 | 8,06E-01 |
| THC2279570      | -1,03 | 5,83E-01 | 8,06E-01 |
| CTA-216E10.6    | 1,02  | 5,83E-01 | 8,06E-01 |
| BC035064        | -1,02 | 5,83E-01 | 8,06E-01 |
| THC2317817      | 1,02  | 5,83E-01 | 8,06E-01 |
| A_24_P923056    | 1,02  | 5,83E-01 | 8,06E-01 |
| HAGHL           | 1,03  | 5,83E-01 | 8,06E-01 |
| RP11-151A6.2    | 1,03  | 5,83E-01 | 8,06E-01 |
| CR602867        | 1,03  | 5,83E-01 | 8,06E-01 |



|                        |       |          |          |
|------------------------|-------|----------|----------|
| <i>BG942819</i>        | 1,02  | 5,83E-01 | 8,06E-01 |
| <i>BMPER</i>           | -1,07 | 5,83E-01 | 8,06E-01 |
| <i>ENST00000346061</i> | -1,05 | 5,83E-01 | 8,06E-01 |
| <i>AF083121</i>        | -1,03 | 5,83E-01 | 8,06E-01 |
| <i>THC2281992</i>      | 1,02  | 5,83E-01 | 8,06E-01 |
| <i>NEDD4</i>           | 1,02  | 5,83E-01 | 8,06E-01 |
| <i>THC2442021</i>      | 1,04  | 5,83E-01 | 8,06E-01 |
| <i>TIMP1</i>           | 1,04  | 5,83E-01 | 8,06E-01 |
| <i>MYBPC2</i>          | 1,02  | 5,84E-01 | 8,06E-01 |
| <i>TMEM25</i>          | -1,04 | 5,84E-01 | 8,06E-01 |
| <i>THC2377542</i>      | -1,02 | 5,84E-01 | 8,06E-01 |
| <i>ZDHHC21</i>         | -1,02 | 5,84E-01 | 8,06E-01 |
| <i>THC2393135</i>      | -1,02 | 5,84E-01 | 8,06E-01 |
| <i>A_23_P331087</i>    | 1,02  | 5,84E-01 | 8,06E-01 |
| <i>OR1Q1</i>           | 1,02  | 5,84E-01 | 8,06E-01 |
| <i>CA311732</i>        | 1,02  | 5,84E-01 | 8,06E-01 |
| <i>A_24_P492919</i>    | 1,02  | 5,84E-01 | 8,06E-01 |
| <i>AL533377</i>        | 1,02  | 5,84E-01 | 8,06E-01 |
| <i>NKIRAS1</i>         | -1,02 | 5,84E-01 | 8,06E-01 |
| <i>TLR7</i>            | -1,05 | 5,84E-01 | 8,07E-01 |
| <i>MT3</i>             | -1,03 | 5,84E-01 | 8,07E-01 |
| <i>C22orf26</i>        | -1,03 | 5,84E-01 | 8,07E-01 |
| <i>GBA2</i>            | -1,02 | 5,84E-01 | 8,07E-01 |
| <i>GTF3C5</i>          | -1,02 | 5,84E-01 | 8,07E-01 |
| <i>CIB1</i>            | 1,01  | 5,84E-01 | 8,07E-01 |
| <i>VPS33A</i>          | 1,02  | 5,84E-01 | 8,07E-01 |
| <i>TTC15</i>           | 1,02  | 5,84E-01 | 8,07E-01 |
| <i>A_24_P931175</i>    | 1,02  | 5,84E-01 | 8,07E-01 |
| <i>SLC12A5</i>         | 1,02  | 5,84E-01 | 8,07E-01 |
| <i>LIMK1</i>           | 1,04  | 5,84E-01 | 8,07E-01 |
| <i>AF159055</i>        | 1,05  | 5,84E-01 | 8,07E-01 |
| <i>AK123431</i>        | -1,02 | 5,85E-01 | 8,07E-01 |
| <i>LOC646200</i>       | 1,02  | 5,85E-01 | 8,07E-01 |
| <i>CENTG3</i>          | -1,03 | 5,85E-01 | 8,07E-01 |
| <i>C20orf152</i>       | -1,02 | 5,85E-01 | 8,07E-01 |
| <i>AK090546</i>        | 1,01  | 5,85E-01 | 8,07E-01 |
| <i>KCNQ1DN</i>         | 1,02  | 5,85E-01 | 8,07E-01 |
| <i>GPR135</i>          | 1,03  | 5,85E-01 | 8,07E-01 |
| <i>A_24_P846755</i>    | 1,03  | 5,85E-01 | 8,07E-01 |
| <i>MFNG</i>            | -1,03 | 5,85E-01 | 8,07E-01 |
| <i>AA330464</i>        | 1,11  | 5,85E-01 | 8,07E-01 |
| <i>37865</i>           | 1,01  | 5,85E-01 | 8,07E-01 |
| <i>THC2448998</i>      | 1,02  | 5,85E-01 | 8,07E-01 |
| <i>UFD1L</i>           | 1,02  | 5,85E-01 | 8,07E-01 |

|                        |       |          |          |
|------------------------|-------|----------|----------|
| <i>BG115911</i>        | 1,05  | 5,85E-01 | 8,07E-01 |
| <i>C8orf55</i>         | -1,02 | 5,85E-01 | 8,07E-01 |
| <i>A_32_P124773</i>    | -1,03 | 5,85E-01 | 8,07E-01 |
| <i>MTCP1</i>           | -1,02 | 5,85E-01 | 8,07E-01 |
| <i>THC2456230</i>      | -1,02 | 5,85E-01 | 8,07E-01 |
| <i>LOC344741</i>       | 1,02  | 5,85E-01 | 8,07E-01 |
| <i>AI762428</i>        | 1,03  | 5,85E-01 | 8,07E-01 |
| <i>THC2342423</i>      | 1,09  | 5,85E-01 | 8,07E-01 |
| <i>TRIM36</i>          | -1,04 | 5,85E-01 | 8,07E-01 |
| <i>THC2436240</i>      | -1,03 | 5,85E-01 | 8,07E-01 |
| <i>FKSG43</i>          | -1,02 | 5,85E-01 | 8,07E-01 |
| <i>LMX1A</i>           | 1,02  | 5,85E-01 | 8,07E-01 |
| <i>C3orf30</i>         | 1,02  | 5,85E-01 | 8,07E-01 |
| <i>A_24_P936947</i>    | 1,02  | 5,85E-01 | 8,07E-01 |
| <i>A_24_P913292</i>    | 1,02  | 5,86E-01 | 8,07E-01 |
| <i>ENST00000357776</i> | -1,04 | 5,86E-01 | 8,07E-01 |
| <i>BF355106</i>        | 1,02  | 5,86E-01 | 8,07E-01 |
| <i>AF086041</i>        | -1,04 | 5,86E-01 | 8,07E-01 |
| <i>THC2276723</i>      | 1,03  | 5,86E-01 | 8,07E-01 |
| <i>THC2398929</i>      | -1,04 | 5,86E-01 | 8,08E-01 |
| <i>GNRHR</i>           | 1,02  | 5,86E-01 | 8,08E-01 |
| <i>NOL12</i>           | 1,02  | 5,86E-01 | 8,08E-01 |
| <i>AF130044</i>        | -1,02 | 5,86E-01 | 8,08E-01 |
| <i>BF989562</i>        | -1,03 | 5,86E-01 | 8,08E-01 |
| <i>MAP1LC3C</i>        | -1,02 | 5,86E-01 | 8,08E-01 |
| <i>AF086511</i>        | -1,02 | 5,86E-01 | 8,08E-01 |
| <i>GRK4</i>            | -1,02 | 5,86E-01 | 8,08E-01 |
| <i>C18orf24</i>        | -1,01 | 5,86E-01 | 8,08E-01 |
| <i>ZNF544</i>          | 1,02  | 5,86E-01 | 8,08E-01 |
| <i>LOC439913</i>       | 1,02  | 5,86E-01 | 8,08E-01 |
| <i>TNIP3</i>           | 1,02  | 5,86E-01 | 8,08E-01 |
| <i>LOC388152</i>       | -1,02 | 5,87E-01 | 8,08E-01 |
| <i>COPS4</i>           | -1,01 | 5,87E-01 | 8,08E-01 |
| <i>A_32_P188127</i>    | -1,03 | 5,87E-01 | 8,08E-01 |
| <i>OLFML1</i>          | -1,03 | 5,87E-01 | 8,08E-01 |
| <i>AL117599</i>        | -1,02 | 5,87E-01 | 8,08E-01 |
| <i>SP100</i>           | -1,02 | 5,87E-01 | 8,08E-01 |
| <i>A_24_P375932</i>    | -1,03 | 5,87E-01 | 8,08E-01 |
| <i>CDH17</i>           | 1,02  | 5,87E-01 | 8,08E-01 |
| <i>PPM1H</i>           | 1,02  | 5,87E-01 | 8,08E-01 |
| <i>ENST00000224034</i> | 1,02  | 5,87E-01 | 8,08E-01 |
| <i>BX393727</i>        | -1,02 | 5,87E-01 | 8,08E-01 |
| <i>LOC200810</i>       | -1,02 | 5,87E-01 | 8,08E-01 |
| <i>HILS1</i>           | -1,02 | 5,87E-01 | 8,08E-01 |

|                        |       |          |          |
|------------------------|-------|----------|----------|
| <i>PHGDHL1</i>         | 1,02  | 5,87E-01 | 8,08E-01 |
| <i>AK123461</i>        | 1,02  | 5,87E-01 | 8,08E-01 |
| <i>AI287491</i>        | 1,02  | 5,87E-01 | 8,08E-01 |
| <i>ZNF205</i>          | 1,03  | 5,87E-01 | 8,09E-01 |
| <i>PCMT1</i>           | -1,02 | 5,88E-01 | 8,09E-01 |
| <i>LRBA</i>            | -1,02 | 5,88E-01 | 8,09E-01 |
| <i>KCTD13</i>          | -1,02 | 5,88E-01 | 8,09E-01 |
| <i>IL28B</i>           | -1,02 | 5,88E-01 | 8,09E-01 |
| <i>DOCK1</i>           | -1,02 | 5,88E-01 | 8,09E-01 |
| <i>A_24_P636130</i>    | 1,02  | 5,88E-01 | 8,09E-01 |
| <i>BET3L</i>           | -1,02 | 5,88E-01 | 8,09E-01 |
| <i>RPL39</i>           | -1,02 | 5,88E-01 | 8,09E-01 |
| <i>KIF1A</i>           | 1,01  | 5,88E-01 | 8,09E-01 |
| <i>A_32_P139012</i>    | 1,02  | 5,88E-01 | 8,09E-01 |
| <i>AK058000</i>        | -1,02 | 5,88E-01 | 8,09E-01 |
| <i>ATPBD3</i>          | -1,02 | 5,88E-01 | 8,09E-01 |
| <i>NMBR</i>            | 1,02  | 5,88E-01 | 8,09E-01 |
| <i>ENST00000369945</i> | 1,04  | 5,88E-01 | 8,09E-01 |
| <i>MECR</i>            | 1,02  | 5,88E-01 | 8,09E-01 |
| <i>NEDD8</i>           | -1,02 | 5,89E-01 | 8,10E-01 |
| <i>RPN1</i>            | -1,03 | 5,89E-01 | 8,10E-01 |
| <i>AK021618</i>        | 1,02  | 5,89E-01 | 8,10E-01 |
| <i>GPR160</i>          | -1,03 | 5,89E-01 | 8,10E-01 |
| <i>LOC497190</i>       | 1,04  | 5,89E-01 | 8,10E-01 |
| <i>AW169007</i>        | -1,02 | 5,89E-01 | 8,10E-01 |
| <i>ENST00000376572</i> | -1,02 | 5,89E-01 | 8,10E-01 |
| <i>DYM</i>             | 1,02  | 5,89E-01 | 8,10E-01 |
| <i>IREB2</i>           | 1,03  | 5,89E-01 | 8,10E-01 |
| <i>HDHD3</i>           | -1,03 | 5,89E-01 | 8,10E-01 |
| <i>SYCP2</i>           | -1,02 | 5,89E-01 | 8,10E-01 |
| <i>AK098534</i>        | 1,02  | 5,89E-01 | 8,10E-01 |
| <i>BG502322</i>        | 1,07  | 5,90E-01 | 8,11E-01 |
| <i>CCDC28B</i>         | -1,03 | 5,90E-01 | 8,11E-01 |
| <i>C18orf17</i>        | -1,03 | 5,90E-01 | 8,11E-01 |
| <i>EDG7</i>            | -1,02 | 5,90E-01 | 8,11E-01 |
| <i>WDR24</i>           | -1,02 | 5,90E-01 | 8,11E-01 |
| <i>AK095631</i>        | -1,02 | 5,90E-01 | 8,11E-01 |
| <i>GDF9</i>            | -1,02 | 5,90E-01 | 8,11E-01 |
| <i>THC2281182</i>      | 1,02  | 5,90E-01 | 8,11E-01 |
| <i>FBXW9</i>           | -1,02 | 5,90E-01 | 8,11E-01 |
| <i>FAU</i>             | -1,02 | 5,90E-01 | 8,11E-01 |
| <i>THC2445487</i>      | -1,02 | 5,90E-01 | 8,11E-01 |
| <i>ENST00000327423</i> | -1,02 | 5,90E-01 | 8,11E-01 |
| <i>PSMC2</i>           | -1,02 | 5,90E-01 | 8,11E-01 |

|                      |       |          |          |
|----------------------|-------|----------|----------|
| <i>WDR26</i>         | -1,02 | 5,90E-01 | 8,11E-01 |
| <i>FLJ45055</i>      | -1,02 | 5,90E-01 | 8,11E-01 |
| <i>BC033058</i>      | -1,03 | 5,90E-01 | 8,11E-01 |
| <i>PRELP</i>         | -1,04 | 5,91E-01 | 8,11E-01 |
| <i>C16orf28</i>      | -1,03 | 5,91E-01 | 8,11E-01 |
| <i>TAZ</i>           | 1,02  | 5,91E-01 | 8,11E-01 |
| <i>RP11-529110.4</i> | 1,02  | 5,91E-01 | 8,11E-01 |
| <i>AA687964</i>      | 1,03  | 5,91E-01 | 8,11E-01 |
| <i>FLT4</i>          | 1,03  | 5,91E-01 | 8,11E-01 |
| <i>A_24_P451992</i>  | 1,03  | 5,91E-01 | 8,11E-01 |
| <i>BC022083</i>      | 1,08  | 5,91E-01 | 8,11E-01 |
| <i>BX097190</i>      | -1,06 | 5,91E-01 | 8,11E-01 |
| <i>AY010113</i>      | 1,02  | 5,91E-01 | 8,11E-01 |
| <i>PEX19</i>         | 1,02  | 5,91E-01 | 8,11E-01 |
| <i>STARD10</i>       | 1,03  | 5,91E-01 | 8,11E-01 |
| <i>BC063022</i>      | -1,07 | 5,91E-01 | 8,11E-01 |
| <i>ITPR1</i>         | -1,06 | 5,91E-01 | 8,11E-01 |
| <i>MED18</i>         | -1,03 | 5,91E-01 | 8,11E-01 |
| <i>LOC340947</i>     | -1,03 | 5,91E-01 | 8,11E-01 |
| <i>ATP6V0A2</i>      | -1,03 | 5,91E-01 | 8,11E-01 |
| <i>SERPINA13</i>     | -1,03 | 5,91E-01 | 8,11E-01 |
| <i>AI244113</i>      | -1,02 | 5,91E-01 | 8,11E-01 |
| <i>THC2377418</i>    | -1,02 | 5,91E-01 | 8,11E-01 |
| <i>GNE</i>           | 1,02  | 5,91E-01 | 8,11E-01 |
| <i>LOC130576</i>     | 1,02  | 5,91E-01 | 8,11E-01 |
| <i>AI016021</i>      | 1,02  | 5,91E-01 | 8,11E-01 |
| <i>AFMID</i>         | 1,02  | 5,91E-01 | 8,11E-01 |
| <i>PAQR5</i>         | 1,02  | 5,91E-01 | 8,11E-01 |
| <i>PGAP1</i>         | 1,02  | 5,91E-01 | 8,11E-01 |
| <i>C9orf163</i>      | 1,03  | 5,91E-01 | 8,11E-01 |
| <i>PLEKHH3</i>       | 1,03  | 5,91E-01 | 8,11E-01 |
| <i>BX110223</i>      | 1,04  | 5,91E-01 | 8,11E-01 |
| <i>LOC388002</i>     | 1,04  | 5,91E-01 | 8,11E-01 |
| <i>SPINK6</i>        | 1,04  | 5,91E-01 | 8,11E-01 |
| <i>LMO7</i>          | 1,04  | 5,91E-01 | 8,11E-01 |
| <i>SGCE</i>          | -1,03 | 5,91E-01 | 8,11E-01 |
| <i>AHSA1</i>         | -1,02 | 5,91E-01 | 8,11E-01 |
| <i>A_24_P418106</i>  | 1,05  | 5,91E-01 | 8,11E-01 |
| <i>CREG1</i>         | -1,02 | 5,92E-01 | 8,12E-01 |
| <i>ICF45</i>         | 1,02  | 5,92E-01 | 8,12E-01 |
| <i>NNAT</i>          | -1,09 | 5,92E-01 | 8,12E-01 |
| <i>A_24_P917001</i>  | -1,02 | 5,92E-01 | 8,12E-01 |
| <i>C17orf58</i>      | -1,08 | 5,92E-01 | 8,12E-01 |
| <i>TXNDC</i>         | -1,02 | 5,92E-01 | 8,12E-01 |

|                        |       |          |          |
|------------------------|-------|----------|----------|
| <i>AI335947</i>        | 1,02  | 5,92E-01 | 8,12E-01 |
| <i>A_24_P153063</i>    | -1,02 | 5,92E-01 | 8,12E-01 |
| <i>DKFZp7790175</i>    | 1,02  | 5,92E-01 | 8,12E-01 |
| <i>SART2</i>           | -1,02 | 5,92E-01 | 8,12E-01 |
| <i>ENST00000329730</i> | -1,02 | 5,92E-01 | 8,12E-01 |
| <i>ENST00000371189</i> | 1,04  | 5,92E-01 | 8,12E-01 |
| <i>AL117636</i>        | 1,12  | 5,92E-01 | 8,12E-01 |
| <i>VPS26A</i>          | -1,02 | 5,92E-01 | 8,12E-01 |
| <i>DOCK11</i>          | 1,02  | 5,92E-01 | 8,12E-01 |
| <i>CR590183</i>        | -1,02 | 5,92E-01 | 8,12E-01 |
| <i>THC2432929</i>      | -1,03 | 5,92E-01 | 8,12E-01 |
| <i>PGLYRP4</i>         | -1,04 | 5,93E-01 | 8,12E-01 |
| <i>MAN2B1</i>          | -1,03 | 5,93E-01 | 8,12E-01 |
| <i>ATPBD4</i>          | 1,02  | 5,93E-01 | 8,12E-01 |
| <i>CD99</i>            | -1,02 | 5,93E-01 | 8,12E-01 |
| <i>DHH</i>             | 1,03  | 5,93E-01 | 8,12E-01 |
| <i>KRT35</i>           | -1,03 | 5,93E-01 | 8,12E-01 |
| <i>EXOC8</i>           | -1,02 | 5,93E-01 | 8,12E-01 |
| <i>LOC389118</i>       | -1,02 | 5,93E-01 | 8,12E-01 |
| <i>SCNN1D</i>          | 1,02  | 5,93E-01 | 8,12E-01 |
| <i>A_23_P124977</i>    | 1,02  | 5,93E-01 | 8,12E-01 |
| <i>THC2322259</i>      | 1,02  | 5,93E-01 | 8,12E-01 |
| <i>A_24_P944872</i>    | 1,03  | 5,93E-01 | 8,12E-01 |
| <i>C18orf54</i>        | -1,02 | 5,93E-01 | 8,12E-01 |
| <i>C6orf1</i>          | -1,02 | 5,93E-01 | 8,12E-01 |
| <i>BM973227</i>        | 1,04  | 5,93E-01 | 8,13E-01 |
| <i>ENST00000313594</i> | -1,05 | 5,93E-01 | 8,13E-01 |
| <i>LOC646262</i>       | 1,02  | 5,93E-01 | 8,13E-01 |
| <i>GAS8</i>            | 1,02  | 5,93E-01 | 8,13E-01 |
| <i>SLC37A1</i>         | 1,02  | 5,93E-01 | 8,13E-01 |
| <i>AF116657</i>        | 1,03  | 5,93E-01 | 8,13E-01 |
| <i>THC2440782</i>      | -1,03 | 5,93E-01 | 8,13E-01 |
| <i>A_32_P220897</i>    | 1,03  | 5,93E-01 | 8,13E-01 |
| <i>MCF2L2</i>          | 1,02  | 5,93E-01 | 8,13E-01 |
| <i>A_24_P587803</i>    | -1,02 | 5,94E-01 | 8,13E-01 |
| <i>THC2291061</i>      | -1,02 | 5,94E-01 | 8,13E-01 |
| <i>KBTBD10</i>         | -1,06 | 5,94E-01 | 8,13E-01 |
| <i>CPNE2</i>           | -1,02 | 5,94E-01 | 8,13E-01 |
| <i>THC2313044</i>      | 1,03  | 5,94E-01 | 8,13E-01 |
| <i>SLC16A6</i>         | -1,03 | 5,94E-01 | 8,13E-01 |
| <i>DEFB105A</i>        | 1,02  | 5,94E-01 | 8,13E-01 |
| <i>G6PC3</i>           | -1,02 | 5,94E-01 | 8,13E-01 |
| <i>KIAA0376</i>        | 1,02  | 5,94E-01 | 8,13E-01 |
| <i>CSRP3</i>           | 1,02  | 5,94E-01 | 8,13E-01 |

|                     |       |          |          |
|---------------------|-------|----------|----------|
| <i>CMIP</i>         | 1,05  | 5,94E-01 | 8,13E-01 |
| <i>KIAA0284</i>     | 1,03  | 5,94E-01 | 8,13E-01 |
| <i>BX111592</i>     | -1,03 | 5,94E-01 | 8,13E-01 |
| <i>BC034627</i>     | -1,02 | 5,94E-01 | 8,13E-01 |
| <i>FLJ22222</i>     | -1,03 | 5,94E-01 | 8,13E-01 |
| <i>MEPE</i>         | -1,03 | 5,94E-01 | 8,13E-01 |
| <i>NCSTN</i>        | -1,02 | 5,94E-01 | 8,13E-01 |
| <i>SF1</i>          | -1,01 | 5,94E-01 | 8,13E-01 |
| <i>PIAS1</i>        | -1,02 | 5,94E-01 | 8,13E-01 |
| <i>THC2329321</i>   | 1,02  | 5,95E-01 | 8,13E-01 |
| <i>PCM1</i>         | 1,01  | 5,95E-01 | 8,13E-01 |
| <i>THC2303500</i>   | 1,02  | 5,95E-01 | 8,13E-01 |
| <i>A_24_P255865</i> | 1,03  | 5,95E-01 | 8,13E-01 |
| <i>CCDC86</i>       | 1,02  | 5,95E-01 | 8,14E-01 |
| <i>THC2339084</i>   | -1,02 | 5,95E-01 | 8,14E-01 |
| <i>A_32_P142195</i> | -1,02 | 5,95E-01 | 8,14E-01 |
| <i>IFNE1</i>        | -1,02 | 5,95E-01 | 8,14E-01 |
| <i>LDHAL6A</i>      | -1,02 | 5,95E-01 | 8,14E-01 |
| <i>TXNDC4</i>       | -1,02 | 5,95E-01 | 8,14E-01 |
| <i>TLN1</i>         | 1,04  | 5,95E-01 | 8,14E-01 |
| <i>THC2283371</i>   | 1,02  | 5,95E-01 | 8,14E-01 |
| <i>PLEKHA7</i>      | -1,03 | 5,95E-01 | 8,14E-01 |
| <i>S100A11</i>      | -1,04 | 5,95E-01 | 8,14E-01 |
| <i>KCTD7</i>        | 1,02  | 5,95E-01 | 8,14E-01 |
| <i>BX455755</i>     | -1,02 | 5,95E-01 | 8,14E-01 |
| <i>A_24_P944402</i> | -1,02 | 5,95E-01 | 8,14E-01 |
| <i>LOC200726</i>    | 1,02  | 5,95E-01 | 8,14E-01 |
| <i>AA004321</i>     | 1,02  | 5,96E-01 | 8,14E-01 |
| <i>DISP2</i>        | -1,07 | 5,96E-01 | 8,14E-01 |
| <i>AK094885</i>     | -1,02 | 5,96E-01 | 8,14E-01 |
| <i>A_24_P919142</i> | -1,02 | 5,96E-01 | 8,14E-01 |
| <i>C18orf58</i>     | 1,02  | 5,96E-01 | 8,14E-01 |
| <i>APC2</i>         | 1,02  | 5,96E-01 | 8,14E-01 |
| <i>BRD2</i>         | 1,03  | 5,96E-01 | 8,14E-01 |
| <i>PPFIBP2</i>      | -1,03 | 5,96E-01 | 8,14E-01 |
| <i>FLJ20021</i>     | 1,03  | 5,96E-01 | 8,14E-01 |
| <i>WDR60</i>        | -1,03 | 5,96E-01 | 8,14E-01 |
| <i>GJB4</i>         | 1,03  | 5,96E-01 | 8,15E-01 |
| <i>LUC7L</i>        | 1,03  | 5,96E-01 | 8,15E-01 |
| <i>LHFP</i>         | -1,03 | 5,96E-01 | 8,15E-01 |
| <i>EDF1</i>         | 1,01  | 5,96E-01 | 8,15E-01 |
| <i>AA861995</i>     | -1,02 | 5,96E-01 | 8,15E-01 |
| <i>THC2318968</i>   | -1,03 | 5,97E-01 | 8,15E-01 |
| <i>NP389850</i>     | -1,02 | 5,97E-01 | 8,15E-01 |

|                        |       |          |          |
|------------------------|-------|----------|----------|
| <i>PPCDC</i>           | -1,01 | 5,97E-01 | 8,15E-01 |
| <i>SFRP2</i>           | -1,14 | 5,97E-01 | 8,15E-01 |
| <i>A_24_P940738</i>    | 1,02  | 5,97E-01 | 8,15E-01 |
| <i>UPK3A</i>           | -1,02 | 5,97E-01 | 8,15E-01 |
| <i>APXL</i>            | -1,03 | 5,97E-01 | 8,15E-01 |
| <i>LOC440607</i>       | -1,06 | 5,97E-01 | 8,15E-01 |
| <i>A_24_P418786</i>    | -1,02 | 5,97E-01 | 8,15E-01 |
| <i>MS4A8B</i>          | -1,02 | 5,97E-01 | 8,15E-01 |
| <i>PYGO1</i>           | -1,02 | 5,97E-01 | 8,15E-01 |
| <i>GML</i>             | -1,02 | 5,97E-01 | 8,15E-01 |
| <i>NCOR1</i>           | 1,02  | 5,97E-01 | 8,15E-01 |
| <i>HMGB1</i>           | 1,02  | 5,97E-01 | 8,15E-01 |
| <i>UNQ3072</i>         | -1,03 | 5,97E-01 | 8,16E-01 |
| <i>LTA4H</i>           | -1,03 | 5,97E-01 | 8,16E-01 |
| <i>A_24_P375435</i>    | -1,02 | 5,98E-01 | 8,16E-01 |
| <i>THYN1</i>           | -1,02 | 5,98E-01 | 8,16E-01 |
| <i>TRIM26</i>          | 1,01  | 5,98E-01 | 8,16E-01 |
| <i>DPYSL4</i>          | -1,10 | 5,98E-01 | 8,16E-01 |
| <i>FLJ14959</i>        | 1,02  | 5,98E-01 | 8,16E-01 |
| <i>TNFRSF11A</i>       | -1,06 | 5,98E-01 | 8,16E-01 |
| <i>CBX7</i>            | 1,04  | 5,98E-01 | 8,16E-01 |
| <i>NAGLU</i>           | -1,02 | 5,98E-01 | 8,16E-01 |
| <i>DDHD2</i>           | -1,02 | 5,98E-01 | 8,16E-01 |
| <i>A_24_P931598</i>    | -1,02 | 5,98E-01 | 8,16E-01 |
| <i>BUB3</i>            | 1,01  | 5,98E-01 | 8,16E-01 |
| <i>A_24_P531720</i>    | 1,02  | 5,98E-01 | 8,16E-01 |
| <i>FAM120B</i>         | 1,02  | 5,98E-01 | 8,16E-01 |
| <i>AI002264</i>        | 1,02  | 5,98E-01 | 8,16E-01 |
| <i>IFNK</i>            | 1,02  | 5,98E-01 | 8,16E-01 |
| <i>PRPF6</i>           | 1,02  | 5,98E-01 | 8,16E-01 |
| <i>GPR97</i>           | 1,02  | 5,98E-01 | 8,16E-01 |
| <i>PFDN5</i>           | 1,03  | 5,98E-01 | 8,16E-01 |
| <i>PRKCD</i>           | 1,03  | 5,98E-01 | 8,16E-01 |
| <i>BI752712</i>        | 1,03  | 5,98E-01 | 8,16E-01 |
| <i>DKFZp564N2472</i>   | 1,02  | 5,98E-01 | 8,16E-01 |
| <i>THC2403806</i>      | -1,02 | 5,98E-01 | 8,16E-01 |
| <i>B3GNT3</i>          | -1,07 | 5,99E-01 | 8,16E-01 |
| <i>SLC22A9</i>         | 1,02  | 5,99E-01 | 8,16E-01 |
| <i>ABI1</i>            | 1,02  | 5,99E-01 | 8,16E-01 |
| <i>ENST00000341893</i> | 1,02  | 5,99E-01 | 8,16E-01 |
| <i>DOK6</i>            | 1,03  | 5,99E-01 | 8,16E-01 |
| <i>FAAH</i>            | -1,02 | 5,99E-01 | 8,16E-01 |
| <i>TXNDC14</i>         | 1,02  | 5,99E-01 | 8,16E-01 |
| <i>A_24_P918782</i>    | 1,02  | 5,99E-01 | 8,16E-01 |

|                        |       |          |          |
|------------------------|-------|----------|----------|
| <i>FLJ10769</i>        | -1,02 | 5,99E-01 | 8,16E-01 |
| <i>FLJ32063</i>        | -1,02 | 5,99E-01 | 8,16E-01 |
| <i>TSPAN33</i>         | 1,03  | 5,99E-01 | 8,16E-01 |
| <i>ENST00000262637</i> | -1,02 | 5,99E-01 | 8,16E-01 |
| <i>THC2346689</i>      | 1,02  | 5,99E-01 | 8,16E-01 |
| <i>THC2380471</i>      | 1,02  | 5,99E-01 | 8,16E-01 |
| <i>CHD1L</i>           | -1,04 | 5,99E-01 | 8,16E-01 |
| <i>AGPAT5</i>          | -1,04 | 5,99E-01 | 8,16E-01 |
| <i>FLJ22795</i>        | -1,04 | 5,99E-01 | 8,16E-01 |
| <i>THC2299592</i>      | -1,02 | 5,99E-01 | 8,16E-01 |
| <i>A_32_P48066</i>     | 1,02  | 5,99E-01 | 8,16E-01 |
| <i>AA453603</i>        | 1,02  | 5,99E-01 | 8,16E-01 |
| <i>BC034791</i>        | 1,03  | 5,99E-01 | 8,16E-01 |
| <i>AK094342</i>        | -1,04 | 5,99E-01 | 8,17E-01 |
| <i>AY116214</i>        | -1,02 | 5,99E-01 | 8,17E-01 |
| <i>ELOF1</i>           | -1,02 | 5,99E-01 | 8,17E-01 |
| <i>HPS1</i>            | 1,01  | 5,99E-01 | 8,17E-01 |
| <i>CPB1</i>            | -1,02 | 6,00E-01 | 8,17E-01 |
| <i>A_32_P196411</i>    | 1,02  | 6,00E-01 | 8,17E-01 |
| <i>TNPO3</i>           | 1,03  | 6,00E-01 | 8,17E-01 |
| <i>AK025096</i>        | 1,02  | 6,00E-01 | 8,17E-01 |
| <i>ENST00000375099</i> | 1,04  | 6,00E-01 | 8,17E-01 |
| <i>OR5A1</i>           | 1,02  | 6,00E-01 | 8,17E-01 |
| <i>A_24_P936172</i>    | -1,02 | 6,00E-01 | 8,17E-01 |
| <i>ANKRD35</i>         | -1,04 | 6,00E-01 | 8,17E-01 |
| <i>AK091348</i>        | -1,04 | 6,00E-01 | 8,17E-01 |
| <i>THC2371808</i>      | -1,02 | 6,00E-01 | 8,17E-01 |
| <i>THC2283875</i>      | -1,02 | 6,00E-01 | 8,17E-01 |
| <i>SYN3</i>            | -1,02 | 6,00E-01 | 8,17E-01 |
| <i>HSP90B1</i>         | -1,03 | 6,00E-01 | 8,17E-01 |
| <i>ENST00000309829</i> | -1,02 | 6,00E-01 | 8,17E-01 |
| <i>CSNK1G1</i>         | 1,02  | 6,00E-01 | 8,17E-01 |
| <i>A_24_P935199</i>    | 1,02  | 6,00E-01 | 8,17E-01 |
| <i>TCF1</i>            | 1,02  | 6,00E-01 | 8,17E-01 |
| <i>THC2348959</i>      | 1,04  | 6,00E-01 | 8,17E-01 |
| <i>MUC7</i>            | 1,02  | 6,00E-01 | 8,17E-01 |
| <i>A_24_P927917</i>    | -1,01 | 6,01E-01 | 8,17E-01 |
| <i>KIAA1804</i>        | 1,02  | 6,01E-01 | 8,17E-01 |
| <i>DNAJC1</i>          | 1,02  | 6,01E-01 | 8,17E-01 |
| <i>FLJ10781</i>        | 1,07  | 6,01E-01 | 8,17E-01 |
| <i>HS3ST5</i>          | -1,03 | 6,01E-01 | 8,17E-01 |
| <i>LOC439936</i>       | -1,06 | 6,01E-01 | 8,18E-01 |
| <i>AI167420</i>        | 1,03  | 6,01E-01 | 8,18E-01 |
| <i>AW014022</i>        | -1,02 | 6,01E-01 | 8,18E-01 |



|                 |       |          |          |
|-----------------|-------|----------|----------|
| CA440162        | 1,02  | 6,01E-01 | 8,18E-01 |
| AI471828        | -1,05 | 6,01E-01 | 8,18E-01 |
| TRIM58          | -1,04 | 6,01E-01 | 8,18E-01 |
| LSM3            | 1,01  | 6,01E-01 | 8,18E-01 |
| ENST00000258873 | 1,02  | 6,01E-01 | 8,18E-01 |
| BF512474        | 1,02  | 6,01E-01 | 8,18E-01 |
| THC2405684      | 1,02  | 6,01E-01 | 8,18E-01 |
| RPS6KB1         | -1,01 | 6,01E-01 | 8,18E-01 |
| HOXD4           | -1,02 | 6,02E-01 | 8,18E-01 |
| MLXIP           | 1,03  | 6,02E-01 | 8,18E-01 |
| BC032569        | 1,03  | 6,02E-01 | 8,18E-01 |
| A_24_P460195    | 1,04  | 6,02E-01 | 8,18E-01 |
| BC015383        | 1,08  | 6,02E-01 | 8,18E-01 |
| IQCE            | -1,02 | 6,02E-01 | 8,18E-01 |
| E2F7            | 1,03  | 6,02E-01 | 8,18E-01 |
| THC2440913      | 1,05  | 6,02E-01 | 8,18E-01 |
| OBP2B           | 1,01  | 6,02E-01 | 8,18E-01 |
| ATP5L           | 1,02  | 6,02E-01 | 8,18E-01 |
| BTNL3           | 1,02  | 6,02E-01 | 8,18E-01 |
| ACTL7A          | -1,03 | 6,02E-01 | 8,18E-01 |
| AK125850        | 1,04  | 6,02E-01 | 8,18E-01 |
| E1A_r60_3       | 1,14  | 6,02E-01 | 8,19E-01 |
| BC013933        | -1,02 | 6,02E-01 | 8,19E-01 |
| AK130099        | -1,04 | 6,02E-01 | 8,19E-01 |
| RAB17           | 1,04  | 6,02E-01 | 8,19E-01 |
| PRKAR2B         | 1,03  | 6,02E-01 | 8,19E-01 |
| MUC3A           | 1,02  | 6,03E-01 | 8,19E-01 |
| VSIG4           | -1,04 | 6,03E-01 | 8,19E-01 |
| LOC114227       | -1,04 | 6,03E-01 | 8,19E-01 |
| THC2340864      | -1,02 | 6,03E-01 | 8,19E-01 |
| CEACAM4         | -1,02 | 6,03E-01 | 8,19E-01 |
| PFN1            | 1,04  | 6,03E-01 | 8,19E-01 |
| A_24_P15906     | 1,05  | 6,03E-01 | 8,19E-01 |
| LOC642680       | -1,03 | 6,03E-01 | 8,19E-01 |
| TEF             | -1,06 | 6,03E-01 | 8,19E-01 |
| BX115064        | -1,02 | 6,03E-01 | 8,19E-01 |
| KRT33A          | 1,11  | 6,03E-01 | 8,19E-01 |
| MMP27           | -1,05 | 6,03E-01 | 8,19E-01 |
| AA458660        | -1,02 | 6,03E-01 | 8,19E-01 |
| E1A_r60_a135    | 1,14  | 6,03E-01 | 8,19E-01 |
| GDPD4           | 1,02  | 6,03E-01 | 8,19E-01 |
| A_24_P59147     | 1,02  | 6,03E-01 | 8,19E-01 |
| NUDCD1          | 1,02  | 6,03E-01 | 8,19E-01 |
| THC2434278      | -1,02 | 6,03E-01 | 8,19E-01 |

|                        |       |          |          |
|------------------------|-------|----------|----------|
| <i>A_24_P938597</i>    | 1,02  | 6,03E-01 | 8,19E-01 |
| <i>AF130065</i>        | -1,02 | 6,03E-01 | 8,19E-01 |
| <i>THC2283862</i>      | -1,07 | 6,04E-01 | 8,19E-01 |
| <i>DEFB4</i>           | -1,06 | 6,03E-01 | 8,19E-01 |
| <i>A_24_P561165</i>    | -1,04 | 6,04E-01 | 8,19E-01 |
| <i>AK091722</i>        | -1,02 | 6,04E-01 | 8,19E-01 |
| <i>BF931515</i>        | -1,02 | 6,04E-01 | 8,19E-01 |
| <i>THC2437122</i>      | -1,02 | 6,04E-01 | 8,19E-01 |
| <i>AF090944</i>        | -1,02 | 6,04E-01 | 8,19E-01 |
| <i>ASCC3L1</i>         | -1,02 | 6,04E-01 | 8,19E-01 |
| <i>AW316654</i>        | -1,02 | 6,04E-01 | 8,19E-01 |
| <i>C8orf34</i>         | 1,02  | 6,04E-01 | 8,19E-01 |
| <i>KPNA4</i>           | 1,03  | 6,04E-01 | 8,19E-01 |
| <i>ITK</i>             | 1,04  | 6,04E-01 | 8,19E-01 |
| <i>KRTAP1-1</i>        | 1,06  | 6,04E-01 | 8,19E-01 |
| <i>AK021715</i>        | -1,05 | 6,04E-01 | 8,19E-01 |
| <i>FH</i>              | 1,03  | 6,04E-01 | 8,19E-01 |
| <i>GLRA3</i>           | 1,02  | 6,04E-01 | 8,19E-01 |
| <i>ENST00000273083</i> | 1,03  | 6,04E-01 | 8,20E-01 |
| <i>A_23_P93247</i>     | -1,02 | 6,04E-01 | 8,20E-01 |
| <i>A_32_P74771</i>     | -1,03 | 6,04E-01 | 8,20E-01 |
| <i>HSBP1</i>           | 1,02  | 6,04E-01 | 8,20E-01 |
| <i>A_24_P24806</i>     | 1,02  | 6,04E-01 | 8,20E-01 |
| <i>AW514263</i>        | 1,02  | 6,04E-01 | 8,20E-01 |
| <i>CCDC109B</i>        | 1,03  | 6,04E-01 | 8,20E-01 |
| <i>CXCL11</i>          | -1,07 | 6,04E-01 | 8,20E-01 |
| <i>THC2268405</i>      | 1,03  | 6,04E-01 | 8,20E-01 |
| <i>ENST00000348904</i> | 1,02  | 6,05E-01 | 8,20E-01 |
| <i>BC042026</i>        | 1,08  | 6,05E-01 | 8,20E-01 |
| <i>THC2281079</i>      | -1,02 | 6,05E-01 | 8,20E-01 |
| <i>IL25</i>            | -1,02 | 6,05E-01 | 8,20E-01 |
| <i>TMEPAI</i>          | -1,04 | 6,05E-01 | 8,20E-01 |
| <i>THC2390265</i>      | -1,02 | 6,05E-01 | 8,20E-01 |
| <i>THC2444422</i>      | -1,02 | 6,05E-01 | 8,20E-01 |
| <i>CPNE4</i>           | 1,17  | 6,05E-01 | 8,20E-01 |
| <i>X61177</i>          | -1,03 | 6,05E-01 | 8,20E-01 |
| <i>C2orf32</i>         | 1,02  | 6,05E-01 | 8,20E-01 |
| <i>ENST00000312401</i> | -1,03 | 6,05E-01 | 8,20E-01 |
| <i>A_32_P222106</i>    | 1,02  | 6,05E-01 | 8,21E-01 |
| <i>CATSPER4</i>        | -1,02 | 6,05E-01 | 8,21E-01 |
| <i>N68297</i>          | 1,02  | 6,05E-01 | 8,21E-01 |
| <i>AI434681</i>        | 1,02  | 6,05E-01 | 8,21E-01 |
| <i>NXPH3</i>           | 1,06  | 6,05E-01 | 8,21E-01 |
| <i>C1orf92</i>         | -1,02 | 6,05E-01 | 8,21E-01 |

|                        |       |          |          |
|------------------------|-------|----------|----------|
| <i>TIMM17A</i>         | 1,02  | 6,06E-01 | 8,21E-01 |
| <i>HOXC4</i>           | 1,02  | 6,06E-01 | 8,21E-01 |
| <i>TAGAP</i>           | 1,06  | 6,06E-01 | 8,21E-01 |
| <i>SPG21</i>           | -1,02 | 6,06E-01 | 8,21E-01 |
| <i>PABPC3</i>          | 1,06  | 6,06E-01 | 8,21E-01 |
| <i>ENST00000335459</i> | 1,02  | 6,06E-01 | 8,21E-01 |
| <i>A_24_P927015</i>    | 1,02  | 6,06E-01 | 8,21E-01 |
| <i>SPINK5</i>          | -1,28 | 6,06E-01 | 8,21E-01 |
| <i>DEFB1</i>           | -1,12 | 6,06E-01 | 8,21E-01 |
| <i>AKR1C4</i>          | 1,02  | 6,06E-01 | 8,21E-01 |
| <i>C8orf75</i>         | -1,02 | 6,06E-01 | 8,21E-01 |
| <i>BRF1</i>            | -1,01 | 6,06E-01 | 8,21E-01 |
| <i>SHARPIN</i>         | 1,01  | 6,06E-01 | 8,21E-01 |
| <i>LOC442421</i>       | 1,03  | 6,06E-01 | 8,21E-01 |
| <i>PLCD4</i>           | 1,04  | 6,06E-01 | 8,21E-01 |
| <i>SPATA7</i>          | -1,03 | 6,06E-01 | 8,22E-01 |
| <i>MPDU1</i>           | 1,04  | 6,07E-01 | 8,22E-01 |
| <i>COL25A1</i>         | 1,03  | 6,07E-01 | 8,22E-01 |
| <i>ROPN1B</i>          | 1,03  | 6,07E-01 | 8,22E-01 |
| <i>LY6D</i>            | 1,22  | 6,07E-01 | 8,22E-01 |
| <i>AK025225</i>        | 1,02  | 6,07E-01 | 8,22E-01 |
| <i>HEBP1</i>           | -1,03 | 6,07E-01 | 8,22E-01 |
| <i>TH</i>              | -1,02 | 6,07E-01 | 8,22E-01 |
| <i>AF034187</i>        | 1,02  | 6,07E-01 | 8,22E-01 |
| <i>LOC286126</i>       | 1,02  | 6,07E-01 | 8,22E-01 |
| <i>F2RL2</i>           | 1,04  | 6,07E-01 | 8,22E-01 |
| <i>THC2300064</i>      | -1,03 | 6,07E-01 | 8,22E-01 |
| <i>AK001038</i>        | -1,03 | 6,07E-01 | 8,22E-01 |
| <i>THC2408016</i>      | -1,02 | 6,07E-01 | 8,22E-01 |
| <i>TTY2</i>            | -1,02 | 6,07E-01 | 8,22E-01 |
| <i>NR_003090</i>       | -1,02 | 6,07E-01 | 8,22E-01 |
| <i>A_32_P213469</i>    | -1,02 | 6,07E-01 | 8,22E-01 |
| <i>C21orf77</i>        | -1,02 | 6,07E-01 | 8,22E-01 |
| <i>THC2456735</i>      | -1,02 | 6,07E-01 | 8,22E-01 |
| <i>AI216457</i>        | 1,02  | 6,07E-01 | 8,22E-01 |
| <i>A_24_P99005</i>     | 1,04  | 6,07E-01 | 8,22E-01 |
| <i>A_23_P21587</i>     | 1,04  | 6,07E-01 | 8,22E-01 |
| <i>PMAIP1</i>          | 1,04  | 6,07E-01 | 8,22E-01 |
| <i>FAM83B</i>          | 1,05  | 6,08E-01 | 8,22E-01 |
| <i>ACTA2</i>           | -1,09 | 6,08E-01 | 8,22E-01 |
| <i>IGFBP3</i>          | -1,06 | 6,08E-01 | 8,22E-01 |
| <i>INTS12</i>          | 1,02  | 6,08E-01 | 8,22E-01 |
| <i>ANKRD42</i>         | 1,02  | 6,08E-01 | 8,22E-01 |
| <i>A_23_P124177</i>    | 1,02  | 6,08E-01 | 8,22E-01 |

|                 |       |          |          |
|-----------------|-------|----------|----------|
| ZNF207          | -1,02 | 6,08E-01 | 8,22E-01 |
| NENF            | 1,02  | 6,08E-01 | 8,22E-01 |
| FLJ44186        | -1,03 | 6,08E-01 | 8,22E-01 |
| ENST00000292543 | 1,02  | 6,08E-01 | 8,22E-01 |
| AI128607        | 1,02  | 6,08E-01 | 8,22E-01 |
| CCDC5           | -1,02 | 6,08E-01 | 8,23E-01 |
| STAC3           | -1,02 | 6,08E-01 | 8,23E-01 |
| DYRK1A          | -1,01 | 6,08E-01 | 8,23E-01 |
| BX115853        | 1,05  | 6,08E-01 | 8,23E-01 |
| A_24_P145787    | -1,02 | 6,08E-01 | 8,23E-01 |
| BRIP1           | 1,02  | 6,08E-01 | 8,23E-01 |
| MTA2            | -1,02 | 6,09E-01 | 8,23E-01 |
| AK024082        | -1,08 | 6,09E-01 | 8,23E-01 |
| A_24_P620521    | 1,03  | 6,09E-01 | 8,23E-01 |
| CFD             | 1,06  | 6,09E-01 | 8,23E-01 |
| PNMT            | -1,06 | 6,09E-01 | 8,23E-01 |
| CRABP1          | -1,04 | 6,09E-01 | 8,23E-01 |
| A_23_P7719      | -1,02 | 6,09E-01 | 8,23E-01 |
| FAM83F          | 1,04  | 6,09E-01 | 8,23E-01 |
| SUMF2           | -1,02 | 6,09E-01 | 8,23E-01 |
| YIPF2           | -1,03 | 6,09E-01 | 8,23E-01 |
| ENAM            | 1,03  | 6,09E-01 | 8,23E-01 |
| HERPUD2         | -1,02 | 6,09E-01 | 8,23E-01 |
| MRPS22          | 1,02  | 6,09E-01 | 8,23E-01 |
| SPATA17         | -1,02 | 6,09E-01 | 8,23E-01 |
| PNMA1           | -1,05 | 6,09E-01 | 8,23E-01 |
| AI961429        | -1,01 | 6,09E-01 | 8,23E-01 |
| RP4-692D3.1     | 1,02  | 6,09E-01 | 8,23E-01 |
| KCNG4           | -1,01 | 6,09E-01 | 8,23E-01 |
| RPS6KA4         | 1,03  | 6,09E-01 | 8,23E-01 |
| SLC7A11         | -1,01 | 6,09E-01 | 8,23E-01 |
| DMRTC2          | 1,02  | 6,09E-01 | 8,23E-01 |
| THC2376526      | 1,02  | 6,09E-01 | 8,23E-01 |
| A_24_P811014    | 1,03  | 6,09E-01 | 8,23E-01 |
| MYRIP           | 1,04  | 6,09E-01 | 8,23E-01 |
| BE693409        | -1,02 | 6,09E-01 | 8,23E-01 |
| OTOP3           | 1,02  | 6,10E-01 | 8,23E-01 |
| A_32_P95973     | 1,03  | 6,10E-01 | 8,23E-01 |
| AF339799        | -1,06 | 6,10E-01 | 8,23E-01 |
| FLJ37538        | -1,03 | 6,10E-01 | 8,23E-01 |
| MGC16275        | -1,01 | 6,10E-01 | 8,23E-01 |
| AK098354        | 1,02  | 6,10E-01 | 8,23E-01 |
| CXCL6           | -1,04 | 6,10E-01 | 8,24E-01 |
| NDUFA8          | -1,03 | 6,10E-01 | 8,24E-01 |

|                        |       |          |          |
|------------------------|-------|----------|----------|
| <i>BM970287</i>        | -1,02 | 6,10E-01 | 8,24E-01 |
| <i>AY358234</i>        | 1,01  | 6,10E-01 | 8,24E-01 |
| <i>A_32_P63266</i>     | 1,02  | 6,10E-01 | 8,24E-01 |
| <i>THC2395899</i>      | 1,03  | 6,10E-01 | 8,24E-01 |
| <i>A_24_P67378</i>     | 1,03  | 6,10E-01 | 8,24E-01 |
| <i>THC2279742</i>      | 1,06  | 6,10E-01 | 8,24E-01 |
| <i>OTOF</i>            | -1,03 | 6,10E-01 | 8,24E-01 |
| <i>A_24_P916228</i>    | -1,02 | 6,10E-01 | 8,24E-01 |
| <i>PAMCI</i>           | 1,03  | 6,10E-01 | 8,24E-01 |
| <i>MRVI1</i>           | 1,06  | 6,10E-01 | 8,24E-01 |
| <i>HPR</i>             | 1,02  | 6,11E-01 | 8,24E-01 |
| <i>ENST00000345111</i> | -1,02 | 6,11E-01 | 8,24E-01 |
| <i>C3orf48</i>         | -1,01 | 6,11E-01 | 8,24E-01 |
| <i>LRRC34</i>          | -1,10 | 6,11E-01 | 8,24E-01 |
| <i>AF131813</i>        | -1,02 | 6,11E-01 | 8,24E-01 |
| <i>LOC401504</i>       | -1,02 | 6,11E-01 | 8,24E-01 |
| <i>R79977</i>          | -1,02 | 6,11E-01 | 8,24E-01 |
| <i>MEGF6</i>           | 1,04  | 6,11E-01 | 8,24E-01 |
| <i>AY358619</i>        | 1,03  | 6,11E-01 | 8,24E-01 |
| <i>GRPR</i>            | 1,02  | 6,11E-01 | 8,24E-01 |
| <i>C20orf179</i>       | -1,02 | 6,11E-01 | 8,25E-01 |
| <i>KRTAP12-2</i>       | -1,02 | 6,11E-01 | 8,25E-01 |
| <i>C14orf140</i>       | 1,02  | 6,11E-01 | 8,25E-01 |
| <i>ECAT8</i>           | 1,06  | 6,11E-01 | 8,25E-01 |
| <i>RP6-213H19.2</i>    | -1,03 | 6,11E-01 | 8,25E-01 |
| <i>LOC148137</i>       | 1,02  | 6,11E-01 | 8,25E-01 |
| <i>A_24_P862524</i>    | -1,02 | 6,11E-01 | 8,25E-01 |
| <i>FAM19A3</i>         | 1,02  | 6,11E-01 | 8,25E-01 |
| <i>GCNT2</i>           | 1,02  | 6,11E-01 | 8,25E-01 |
| <i>DDOST</i>           | -1,03 | 6,12E-01 | 8,25E-01 |
| <i>HOXC5</i>           | -1,02 | 6,12E-01 | 8,25E-01 |
| <i>GLTSCR1</i>         | -1,04 | 6,12E-01 | 8,25E-01 |
| <i>A_23_P125109</i>    | -1,03 | 6,12E-01 | 8,25E-01 |
| <i>MED25</i>           | -1,02 | 6,12E-01 | 8,25E-01 |
| <i>C17orf68</i>        | 1,02  | 6,12E-01 | 8,25E-01 |
| <i>SNRPA1</i>          | 1,03  | 6,12E-01 | 8,25E-01 |
| <i>HIST1H2BF</i>       | -1,02 | 6,12E-01 | 8,25E-01 |
| <i>SH2D4A</i>          | -1,03 | 6,12E-01 | 8,25E-01 |
| <i>RS1</i>             | -1,01 | 6,12E-01 | 8,25E-01 |
| <i>A_24_P534243</i>    | 1,02  | 6,12E-01 | 8,25E-01 |
| <i>AK075484</i>        | -1,04 | 6,12E-01 | 8,25E-01 |
| <i>BC071734</i>        | -1,03 | 6,12E-01 | 8,25E-01 |
| <i>BG980953</i>        | -1,03 | 6,13E-01 | 8,25E-01 |
| <i>AL359605</i>        | 1,02  | 6,13E-01 | 8,25E-01 |

|                        |       |          |          |
|------------------------|-------|----------|----------|
| <i>ABHD13</i>          | 1,02  | 6,12E-01 | 8,25E-01 |
| <i>ENST00000378179</i> | 1,02  | 6,12E-01 | 8,25E-01 |
| <i>LOC441178</i>       | -1,03 | 6,13E-01 | 8,26E-01 |
| <i>PQBP1</i>           | 1,01  | 6,13E-01 | 8,26E-01 |
| <i>TRIM8</i>           | 1,03  | 6,13E-01 | 8,26E-01 |
| <i>THC2387551</i>      | 1,02  | 6,13E-01 | 8,26E-01 |
| <i>SPINK4</i>          | -1,02 | 6,13E-01 | 8,26E-01 |
| <i>PIGW</i>            | -1,02 | 6,13E-01 | 8,26E-01 |
| <i>CSTA</i>            | -1,25 | 6,13E-01 | 8,26E-01 |
| <i>A_24_P178167</i>    | -1,03 | 6,13E-01 | 8,26E-01 |
| <i>A_24_P7181</i>      | -1,03 | 6,13E-01 | 8,26E-01 |
| <i>ENST00000259447</i> | 1,02  | 6,13E-01 | 8,26E-01 |
| <i>ENST00000380231</i> | 1,03  | 6,13E-01 | 8,26E-01 |
| <i>BC005109</i>        | 1,03  | 6,13E-01 | 8,26E-01 |
| <i>THC2455353</i>      | 1,03  | 6,13E-01 | 8,26E-01 |
| <i>THC2387910</i>      | -1,03 | 6,13E-01 | 8,26E-01 |
| <i>B4GALT3</i>         | 1,02  | 6,13E-01 | 8,26E-01 |
| <i>C5orf5</i>          | -1,03 | 6,13E-01 | 8,26E-01 |
| <i>BQ018742</i>        | -1,02 | 6,13E-01 | 8,26E-01 |
| <i>ZNF557</i>          | 1,02  | 6,13E-01 | 8,26E-01 |
| <i>KCTD11</i>          | 1,02  | 6,13E-01 | 8,26E-01 |
| <i>THC2286682</i>      | -1,02 | 6,13E-01 | 8,26E-01 |
| <i>C11orf48</i>        | -1,02 | 6,13E-01 | 8,26E-01 |
| <i>PLD5</i>            | -1,04 | 6,14E-01 | 8,26E-01 |
| <i>PMF1</i>            | -1,02 | 6,14E-01 | 8,26E-01 |
| <i>AL049270</i>        | -1,02 | 6,14E-01 | 8,26E-01 |
| <i>PSEN1</i>           | -1,01 | 6,14E-01 | 8,26E-01 |
| <i>OBFC2B</i>          | -1,02 | 6,14E-01 | 8,26E-01 |
| <i>A_23_P15226</i>     | -1,06 | 6,14E-01 | 8,26E-01 |
| <i>A_24_P229438</i>    | 1,02  | 6,14E-01 | 8,26E-01 |
| <i>ENST00000339993</i> | -1,02 | 6,14E-01 | 8,26E-01 |
| <i>AI143116</i>        | -1,02 | 6,14E-01 | 8,26E-01 |
| <i>THC2269145</i>      | -1,03 | 6,14E-01 | 8,26E-01 |
| <i>KRT85</i>           | -1,03 | 6,14E-01 | 8,27E-01 |
| <i>BC013799</i>        | 1,02  | 6,14E-01 | 8,27E-01 |
| <i>A_24_P808838</i>    | -1,02 | 6,14E-01 | 8,27E-01 |
| <i>AF090920</i>        | -1,02 | 6,14E-01 | 8,27E-01 |
| <i>PDP2</i>            | -1,02 | 6,14E-01 | 8,27E-01 |
| <i>FLJ39822</i>        | -1,09 | 6,14E-01 | 8,27E-01 |
| <i>FLJ37673</i>        | -1,02 | 6,14E-01 | 8,27E-01 |
| <i>A_24_P921519</i>    | -1,02 | 6,15E-01 | 8,27E-01 |
| <i>A_24_P135933</i>    | 1,04  | 6,15E-01 | 8,27E-01 |
| <i>MLLT11</i>          | -1,08 | 6,15E-01 | 8,27E-01 |
| <i>PLCG2</i>           | -1,02 | 6,15E-01 | 8,27E-01 |

|                        |       |          |          |
|------------------------|-------|----------|----------|
| <i>TESSP2</i>          | 1,02  | 6,15E-01 | 8,27E-01 |
| <i>CIRH1A</i>          | 1,02  | 6,15E-01 | 8,27E-01 |
| <i>AK023557</i>        | 1,03  | 6,15E-01 | 8,27E-01 |
| <i>C19orf33</i>        | 1,10  | 6,15E-01 | 8,27E-01 |
| <i>A_24_P33105</i>     | -1,02 | 6,15E-01 | 8,27E-01 |
| <i>CR616314</i>        | 1,02  | 6,15E-01 | 8,27E-01 |
| <i>NPTXR</i>           | 1,02  | 6,15E-01 | 8,27E-01 |
| <i>LOC401127</i>       | -1,02 | 6,15E-01 | 8,27E-01 |
| <i>NP373359</i>        | 1,02  | 6,15E-01 | 8,27E-01 |
| <i>TATDN1</i>          | 1,02  | 6,15E-01 | 8,27E-01 |
| <i>TMEM66</i>          | 1,02  | 6,15E-01 | 8,27E-01 |
| <i>ENST00000382914</i> | 1,02  | 6,15E-01 | 8,27E-01 |
| <i>DNAI2</i>           | 1,02  | 6,15E-01 | 8,27E-01 |
| <i>UBN1</i>            | 1,02  | 6,15E-01 | 8,27E-01 |
| <i>THC2443387</i>      | 1,02  | 6,15E-01 | 8,27E-01 |
| <i>LOC393078</i>       | 1,06  | 6,15E-01 | 8,27E-01 |
| <i>N52008</i>          | 1,02  | 6,15E-01 | 8,27E-01 |
| <i>PCDH20</i>          | 1,07  | 6,15E-01 | 8,27E-01 |
| <i>AQP3</i>            | -1,12 | 6,16E-01 | 8,27E-01 |
| <i>FTSJ3</i>           | -1,02 | 6,15E-01 | 8,27E-01 |
| <i>PQWD</i>            | -1,02 | 6,15E-01 | 8,27E-01 |
| <i>SERP1</i>           | -1,02 | 6,16E-01 | 8,27E-01 |
| <i>MTPN</i>            | 1,01  | 6,16E-01 | 8,27E-01 |
| <i>CD641036</i>        | 1,02  | 6,16E-01 | 8,27E-01 |
| <i>A_24_P922314</i>    | 1,02  | 6,16E-01 | 8,27E-01 |
| <i>SNRPD2</i>          | -1,02 | 6,16E-01 | 8,27E-01 |
| <i>LENEP</i>           | -1,02 | 6,16E-01 | 8,27E-01 |
| <i>AJ710595</i>        | 1,02  | 6,16E-01 | 8,27E-01 |
| <i>A_24_P679984</i>    | -1,02 | 6,16E-01 | 8,27E-01 |
| <i>A_24_P127098</i>    | -1,02 | 6,16E-01 | 8,27E-01 |
| <i>AGTR2</i>           | -1,11 | 6,16E-01 | 8,28E-01 |
| <i>PGBD5</i>           | -1,08 | 6,16E-01 | 8,28E-01 |
| <i>CLDN15</i>          | -1,02 | 6,16E-01 | 8,28E-01 |
| <i>ALG6</i>            | -1,02 | 6,16E-01 | 8,28E-01 |
| <i>THC2455481</i>      | -1,02 | 6,16E-01 | 8,28E-01 |
| <i>TMEM147</i>         | -1,01 | 6,16E-01 | 8,28E-01 |
| <i>HSA251708</i>       | -1,01 | 6,16E-01 | 8,28E-01 |
| <i>WBSCR28</i>         | 1,02  | 6,16E-01 | 8,28E-01 |
| <i>CTCFI</i>           | 1,02  | 6,16E-01 | 8,28E-01 |
| <i>A_32_P188841</i>    | 1,02  | 6,16E-01 | 8,28E-01 |
| <i>ENST00000374458</i> | 1,02  | 6,16E-01 | 8,28E-01 |
| <i>LRR55</i>           | 1,02  | 6,16E-01 | 8,28E-01 |
| <i>THC2319152</i>      | 1,02  | 6,16E-01 | 8,28E-01 |
| <i>A_24_P930327</i>    | 1,02  | 6,16E-01 | 8,28E-01 |

|                        |       |          |          |
|------------------------|-------|----------|----------|
| <i>LOC153346</i>       | 1,06  | 6,16E-01 | 8,28E-01 |
| <i>FLJ32549</i>        | -1,04 | 6,16E-01 | 8,28E-01 |
| <i>CCDC105</i>         | -1,02 | 6,17E-01 | 8,28E-01 |
| <i>DTX3L</i>           | 1,02  | 6,17E-01 | 8,28E-01 |
| <i>C16orf55</i>        | 1,02  | 6,17E-01 | 8,28E-01 |
| <i>AB074268</i>        | 1,03  | 6,17E-01 | 8,28E-01 |
| <i>THC2337363</i>      | 1,02  | 6,17E-01 | 8,28E-01 |
| <i>ENST00000371528</i> | -1,02 | 6,17E-01 | 8,28E-01 |
| <i>THC2411536</i>      | -1,05 | 6,17E-01 | 8,28E-01 |
| <i>AF090909</i>        | -1,02 | 6,17E-01 | 8,28E-01 |
| <i>LOC642480</i>       | 1,05  | 6,17E-01 | 8,28E-01 |
| <i>TRPM7</i>           | -1,02 | 6,17E-01 | 8,28E-01 |
| <i>OTX2</i>            | 1,02  | 6,17E-01 | 8,28E-01 |
| <i>FAM70A</i>          | 1,06  | 6,17E-01 | 8,28E-01 |
| <i>PROK2</i>           | 1,08  | 6,17E-01 | 8,28E-01 |
| <i>A_24_P101352</i>    | -1,02 | 6,17E-01 | 8,28E-01 |
| <i>SLC25A35</i>        | -1,02 | 6,17E-01 | 8,28E-01 |
| <i>AT_nX_3</i>         | -1,01 | 6,17E-01 | 8,28E-01 |
| <i>AGPAT3</i>          | 1,01  | 6,17E-01 | 8,28E-01 |
| <i>AK094796</i>        | 1,03  | 6,17E-01 | 8,28E-01 |
| <i>BE019257</i>        | 1,01  | 6,17E-01 | 8,28E-01 |
| <i>ENST00000376611</i> | 1,02  | 6,17E-01 | 8,28E-01 |
| <i>KLK7</i>            | -1,09 | 6,18E-01 | 8,28E-01 |
| <i>AT_nD_5</i>         | -1,01 | 6,18E-01 | 8,28E-01 |
| <i>KNS2</i>            | 1,02  | 6,18E-01 | 8,28E-01 |
| <i>W88467</i>          | 1,03  | 6,18E-01 | 8,28E-01 |
| <i>MFSD2</i>           | 1,03  | 6,18E-01 | 8,28E-01 |
| <i>GPR32</i>           | 1,03  | 6,18E-01 | 8,28E-01 |
| <i>CITED4</i>          | -1,04 | 6,18E-01 | 8,28E-01 |
| <i>CENPF</i>           | -1,03 | 6,18E-01 | 8,28E-01 |
| <i>A_24_P58477</i>     | -1,02 | 6,18E-01 | 8,28E-01 |
| <i>A_24_P24912</i>     | 1,04  | 6,18E-01 | 8,28E-01 |
| <i>DSG1</i>            | 1,09  | 6,18E-01 | 8,28E-01 |
| <i>BG214826</i>        | -1,02 | 6,18E-01 | 8,28E-01 |
| <i>A_24_P918810</i>    | -1,02 | 6,18E-01 | 8,28E-01 |
| <i>GAGE3</i>           | -1,02 | 6,18E-01 | 8,28E-01 |
| <i>PSTPIP1</i>         | -1,03 | 6,18E-01 | 8,28E-01 |
| <i>PCNXL2</i>          | -1,02 | 6,18E-01 | 8,28E-01 |
| <i>FADS6</i>           | 1,02  | 6,18E-01 | 8,28E-01 |
| <i>A_24_P92973</i>     | 1,04  | 6,18E-01 | 8,28E-01 |
| <i>DDX11</i>           | -1,04 | 6,18E-01 | 8,28E-01 |
| <i>A_24_P358337</i>    | -1,07 | 6,18E-01 | 8,29E-01 |
| <i>MGC10433</i>        | 1,02  | 6,18E-01 | 8,29E-01 |
| <i>IGSF1</i>           | -1,05 | 6,18E-01 | 8,29E-01 |



|                        |       |          |          |
|------------------------|-------|----------|----------|
| <i>C8orf14</i>         | -1,02 | 6,18E-01 | 8,29E-01 |
| <i>GDF2</i>            | -1,02 | 6,18E-01 | 8,29E-01 |
| <i>A_24_P922624</i>    | 1,02  | 6,18E-01 | 8,29E-01 |
| <i>CDC25A</i>          | -1,06 | 6,18E-01 | 8,29E-01 |
| <i>RYR3</i>            | 1,03  | 6,19E-01 | 8,29E-01 |
| <i>A_24_P918007</i>    | 1,02  | 6,19E-01 | 8,29E-01 |
| <i>TYW1</i>            | -1,04 | 6,19E-01 | 8,29E-01 |
| <i>AY358242</i>        | -1,02 | 6,19E-01 | 8,29E-01 |
| <i>PAX3</i>            | 1,02  | 6,19E-01 | 8,29E-01 |
| <i>A_32_P404896</i>    | -1,04 | 6,19E-01 | 8,29E-01 |
| <i>N28017</i>          | -1,03 | 6,19E-01 | 8,29E-01 |
| <i>GOS2</i>            | 1,08  | 6,19E-01 | 8,29E-01 |
| <i>MKKS</i>            | -1,01 | 6,19E-01 | 8,29E-01 |
| <i>AA916168</i>        | -1,02 | 6,19E-01 | 8,29E-01 |
| <i>ZNF131</i>          | 1,02  | 6,19E-01 | 8,29E-01 |
| <i>KIAA0974</i>        | 1,02  | 6,19E-01 | 8,29E-01 |
| <i>CLDN22</i>          | 1,02  | 6,20E-01 | 8,30E-01 |
| <i>BUB1</i>            | -1,03 | 6,20E-01 | 8,30E-01 |
| <i>A_32_P99744</i>     | 1,02  | 6,20E-01 | 8,30E-01 |
| <i>TJP2</i>            | 1,03  | 6,20E-01 | 8,30E-01 |
| <i>BC037323</i>        | -1,05 | 6,20E-01 | 8,30E-01 |
| <i>RABL5</i>           | -1,02 | 6,20E-01 | 8,30E-01 |
| <i>ENST00000330935</i> | 1,02  | 6,20E-01 | 8,30E-01 |
| <i>SPANX-N3</i>        | 1,04  | 6,20E-01 | 8,30E-01 |
| <i>ALG5</i>            | -1,02 | 6,20E-01 | 8,30E-01 |
| <i>FAM9C</i>           | -1,02 | 6,20E-01 | 8,30E-01 |
| <i>A_24_P828818</i>    | 1,02  | 6,20E-01 | 8,30E-01 |
| <i>ZBED2</i>           | -1,06 | 6,20E-01 | 8,30E-01 |
| <i>A_24_P452326</i>    | -1,02 | 6,20E-01 | 8,30E-01 |
| <i>AK057152</i>        | -1,02 | 6,20E-01 | 8,30E-01 |
| <i>THC2307382</i>      | -1,02 | 6,21E-01 | 8,30E-01 |
| <i>E1A_r60_a97</i>     | 1,12  | 6,21E-01 | 8,30E-01 |
| <i>AL049254</i>        | 1,02  | 6,21E-01 | 8,31E-01 |
| <i>C5orf13</i>         | 1,04  | 6,21E-01 | 8,31E-01 |
| <i>RRAGC</i>           | -1,04 | 6,21E-01 | 8,31E-01 |
| <i>TNFRSF14</i>        | -1,03 | 6,21E-01 | 8,31E-01 |
| <i>FAM12A</i>          | -1,02 | 6,21E-01 | 8,31E-01 |
| <i>RTF1</i>            | -1,02 | 6,21E-01 | 8,31E-01 |
| <i>SRrp35</i>          | 1,03  | 6,21E-01 | 8,31E-01 |
| <i>DNAJC7</i>          | 1,01  | 6,21E-01 | 8,31E-01 |
| <i>NUDT22</i>          | 1,02  | 6,21E-01 | 8,31E-01 |
| <i>A_24_P914208</i>    | 1,04  | 6,21E-01 | 8,31E-01 |
| <i>ICOS</i>            | 1,06  | 6,21E-01 | 8,31E-01 |
| <i>ARHGEF10</i>        | -1,02 | 6,21E-01 | 8,31E-01 |

|                        |       |          |          |
|------------------------|-------|----------|----------|
| <i>THC2310788</i>      | 1,02  | 6,21E-01 | 8,31E-01 |
| <i>THC2267317</i>      | -1,02 | 6,21E-01 | 8,31E-01 |
| <i>SEC61A1</i>         | -1,05 | 6,21E-01 | 8,31E-01 |
| <i>GFPT2</i>           | -1,04 | 6,21E-01 | 8,31E-01 |
| <i>BC030211</i>        | -1,03 | 6,21E-01 | 8,31E-01 |
| <i>ZDHHC15</i>         | -1,02 | 6,21E-01 | 8,31E-01 |
| <i>SDF4</i>            | -1,02 | 6,21E-01 | 8,31E-01 |
| <i>RNF190</i>          | -1,02 | 6,21E-01 | 8,31E-01 |
| <i>BE696323</i>        | 1,01  | 6,21E-01 | 8,31E-01 |
| <i>A_24_P110172</i>    | 1,02  | 6,21E-01 | 8,31E-01 |
| <i>THC2407002</i>      | 1,02  | 6,21E-01 | 8,31E-01 |
| <i>GGTLA1</i>          | -1,04 | 6,22E-01 | 8,31E-01 |
| <i>CEACAM19</i>        | 1,02  | 6,22E-01 | 8,31E-01 |
| <i>C20orf107</i>       | -1,02 | 6,22E-01 | 8,31E-01 |
| <i>IMMP1L</i>          | -1,02 | 6,22E-01 | 8,31E-01 |
| <i>ENST00000238638</i> | 1,02  | 6,22E-01 | 8,31E-01 |
| <i>A_32_P63630</i>     | -1,02 | 6,22E-01 | 8,31E-01 |
| <i>VCX</i>             | -1,02 | 6,22E-01 | 8,31E-01 |
| <i>RPS6KA1</i>         | -1,02 | 6,22E-01 | 8,31E-01 |
| <i>C22orf15</i>        | 1,02  | 6,22E-01 | 8,31E-01 |
| <i>SLC18A1</i>         | -1,02 | 6,22E-01 | 8,31E-01 |
| <i>BG951379</i>        | -1,02 | 6,22E-01 | 8,31E-01 |
| <i>A_32_P31206</i>     | -1,03 | 6,22E-01 | 8,32E-01 |
| <i>B3GALT4</i>         | 1,02  | 6,22E-01 | 8,32E-01 |
| <i>A_23_P207049</i>    | 1,02  | 6,22E-01 | 8,32E-01 |
| <i>THC2371798</i>      | -1,07 | 6,22E-01 | 8,32E-01 |
| <i>MICAL2</i>          | -1,05 | 6,23E-01 | 8,32E-01 |
| <i>ENST00000217537</i> | -1,02 | 6,23E-01 | 8,32E-01 |
| <i>BU627449</i>        | -1,02 | 6,23E-01 | 8,32E-01 |
| <i>FLJ40235</i>        | -1,02 | 6,23E-01 | 8,32E-01 |
| <i>INSL3</i>           | -1,02 | 6,23E-01 | 8,32E-01 |
| <i>C1orf128</i>        | -1,02 | 6,23E-01 | 8,32E-01 |
| <i>YIPF6</i>           | -1,02 | 6,23E-01 | 8,32E-01 |
| <i>HNRPH1</i>          | -1,02 | 6,23E-01 | 8,32E-01 |
| <i>MRPL49</i>          | -1,02 | 6,22E-01 | 8,32E-01 |
| <i>BC030768</i>        | -1,02 | 6,23E-01 | 8,32E-01 |
| <i>GABARAP</i>         | -1,02 | 6,23E-01 | 8,32E-01 |
| <i>SERPINC1</i>        | -1,01 | 6,23E-01 | 8,32E-01 |
| <i>AF130075</i>        | -1,01 | 6,23E-01 | 8,32E-01 |
| <i>STOML2</i>          | 1,02  | 6,23E-01 | 8,32E-01 |
| <i>ENST00000329044</i> | 1,02  | 6,23E-01 | 8,32E-01 |
| <i>CCNI</i>            | 1,02  | 6,23E-01 | 8,32E-01 |
| <i>RYR1</i>            | 1,02  | 6,23E-01 | 8,32E-01 |
| <i>BC014370</i>        | 1,03  | 6,23E-01 | 8,32E-01 |

|                        |       |          |          |
|------------------------|-------|----------|----------|
| <i>CD34</i>            | 1,03  | 6,23E-01 | 8,32E-01 |
| <i>TMC5</i>            | 1,03  | 6,22E-01 | 8,32E-01 |
| <i>CRH</i>             | 1,03  | 6,23E-01 | 8,32E-01 |
| <i>BC033052</i>        | 1,03  | 6,23E-01 | 8,32E-01 |
| <i>COPS7A</i>          | -1,02 | 6,23E-01 | 8,32E-01 |
| <i>AL390150</i>        | 1,02  | 6,23E-01 | 8,32E-01 |
| <i>KIAA0523</i>        | 1,03  | 6,23E-01 | 8,32E-01 |
| <i>THC2304641</i>      | -1,03 | 6,23E-01 | 8,32E-01 |
| <i>BC036261</i>        | -1,02 | 6,23E-01 | 8,32E-01 |
| <i>TGOLN2</i>          | 1,01  | 6,23E-01 | 8,32E-01 |
| <i>ENST00000361500</i> | 1,02  | 6,23E-01 | 8,32E-01 |
| <i>NRIP2</i>           | 1,03  | 6,23E-01 | 8,32E-01 |
| <i>NRF1</i>            | -1,02 | 6,23E-01 | 8,32E-01 |
| <i>LOC644063</i>       | -1,01 | 6,23E-01 | 8,32E-01 |
| <i>SCGB1A1</i>         | 1,02  | 6,23E-01 | 8,32E-01 |
| <i>ATP2B3</i>          | -1,02 | 6,23E-01 | 8,32E-01 |
| <i>LOC388938</i>       | 1,02  | 6,23E-01 | 8,32E-01 |
| <i>FAM77D</i>          | -1,05 | 6,24E-01 | 8,32E-01 |
| <i>A_23_P254384</i>    | -1,03 | 6,24E-01 | 8,32E-01 |
| <i>C14orf29</i>        | -1,02 | 6,24E-01 | 8,32E-01 |
| <i>THC2409935</i>      | -1,02 | 6,24E-01 | 8,32E-01 |
| <i>C16orf7</i>         | -1,02 | 6,24E-01 | 8,32E-01 |
| <i>PRAMEF3</i>         | -1,02 | 6,24E-01 | 8,32E-01 |
| <i>SPINLW1</i>         | -1,01 | 6,24E-01 | 8,32E-01 |
| <i>CLPP</i>            | -1,01 | 6,24E-01 | 8,32E-01 |
| <i>PGLYRP3</i>         | -1,01 | 6,24E-01 | 8,32E-01 |
| <i>P2RY10</i>          | 1,02  | 6,24E-01 | 8,32E-01 |
| <i>FAM40B</i>          | 1,02  | 6,24E-01 | 8,32E-01 |
| <i>BQ000122</i>        | 1,02  | 6,24E-01 | 8,32E-01 |
| <i>RUNX2</i>           | 1,02  | 6,24E-01 | 8,32E-01 |
| <i>A_32_P228290</i>    | 1,02  | 6,24E-01 | 8,32E-01 |
| <i>ADAM29</i>          | 1,02  | 6,24E-01 | 8,32E-01 |
| <i>CERK</i>            | 1,03  | 6,24E-01 | 8,32E-01 |
| <i>C16orf50</i>        | 1,03  | 6,24E-01 | 8,32E-01 |
| <i>THC2281118</i>      | -1,04 | 6,24E-01 | 8,32E-01 |
| <i>A_32_P221590</i>    | -1,02 | 6,24E-01 | 8,32E-01 |
| <i>ENST00000332107</i> | 1,02  | 6,24E-01 | 8,32E-01 |
| <i>AI093683</i>        | -1,04 | 6,24E-01 | 8,32E-01 |
| <i>ITM2B</i>           | -1,02 | 6,24E-01 | 8,32E-01 |
| <i>COPS6</i>           | -1,01 | 6,24E-01 | 8,32E-01 |
| <i>TMEM24</i>          | 1,02  | 6,24E-01 | 8,32E-01 |
| <i>PLS1</i>            | -1,03 | 6,24E-01 | 8,32E-01 |
| <i>DPCR1</i>           | 1,01  | 6,24E-01 | 8,32E-01 |
| <i>RABGAP1</i>         | 1,02  | 6,24E-01 | 8,32E-01 |

|                        |       |          |          |
|------------------------|-------|----------|----------|
| <i>THC2316487</i>      | 1,02  | 6,24E-01 | 8,32E-01 |
| <i>A_24_P545587</i>    | -1,02 | 6,24E-01 | 8,32E-01 |
| <i>NPY6R</i>           | 1,02  | 6,24E-01 | 8,32E-01 |
| <i>A_24_P230416</i>    | -1,02 | 6,25E-01 | 8,32E-01 |
| <i>C12orf36</i>        | -1,02 | 6,25E-01 | 8,32E-01 |
| <i>AK055306</i>        | -1,02 | 6,25E-01 | 8,32E-01 |
| <i>RASGRF1</i>         | -1,02 | 6,25E-01 | 8,32E-01 |
| <i>THC2404334</i>      | 1,02  | 6,25E-01 | 8,32E-01 |
| <i>NR1I3</i>           | 1,02  | 6,25E-01 | 8,32E-01 |
| <i>RASGRP4</i>         | 1,02  | 6,25E-01 | 8,32E-01 |
| <i>MBP</i>             | 1,05  | 6,25E-01 | 8,32E-01 |
| <i>ENST00000329949</i> | -1,02 | 6,25E-01 | 8,32E-01 |
| <i>A_24_P837234</i>    | -1,02 | 6,25E-01 | 8,32E-01 |
| <i>ATP6V0E</i>         | -1,02 | 6,25E-01 | 8,32E-01 |
| <i>AK024184</i>        | 1,02  | 6,25E-01 | 8,32E-01 |
| <i>NXPH2</i>           | 1,02  | 6,25E-01 | 8,32E-01 |
| <i>EFNB3</i>           | -1,04 | 6,25E-01 | 8,32E-01 |
| <i>RHOF</i>            | -1,03 | 6,25E-01 | 8,32E-01 |
| <i>FAM91A2</i>         | -1,03 | 6,25E-01 | 8,32E-01 |
| <i>SYP</i>             | -1,02 | 6,25E-01 | 8,32E-01 |
| <i>BM683433</i>        | -1,02 | 6,25E-01 | 8,32E-01 |
| <i>LOC642008</i>       | -1,02 | 6,25E-01 | 8,32E-01 |
| <i>ELAC2</i>           | -1,02 | 6,25E-01 | 8,32E-01 |
| <i>ZNF161</i>          | -1,01 | 6,25E-01 | 8,32E-01 |
| <i>TCP1</i>            | 1,02  | 6,25E-01 | 8,32E-01 |
| <i>HCLS1</i>           | 1,04  | 6,25E-01 | 8,32E-01 |
| <i>THC2378961</i>      | -1,02 | 6,25E-01 | 8,32E-01 |
| <i>ENST00000299694</i> | -1,03 | 6,26E-01 | 8,33E-01 |
| <i>SEMA4F</i>          | -1,02 | 6,26E-01 | 8,33E-01 |
| <i>EIF2S2</i>          | 1,02  | 6,26E-01 | 8,33E-01 |
| <i>THC2235542</i>      | 1,02  | 6,26E-01 | 8,33E-01 |
| <i>A_24_P791913</i>    | 1,02  | 6,26E-01 | 8,33E-01 |
| <i>FLJ39660</i>        | 1,01  | 6,26E-01 | 8,33E-01 |
| <i>SCNM1</i>           | -1,02 | 6,26E-01 | 8,33E-01 |
| <i>KLHL8</i>           | -1,03 | 6,26E-01 | 8,33E-01 |
| <i>TP53I3</i>          | -1,04 | 6,26E-01 | 8,33E-01 |
| <i>CRB2</i>            | -1,02 | 6,26E-01 | 8,33E-01 |
| <i>GABBR2</i>          | -1,02 | 6,26E-01 | 8,33E-01 |
| <i>BAT3</i>            | 1,01  | 6,26E-01 | 8,33E-01 |
| <i>AK096225</i>        | 1,02  | 6,26E-01 | 8,33E-01 |
| <i>LOC654347</i>       | 1,02  | 6,26E-01 | 8,33E-01 |
| <i>BC040653</i>        | -1,03 | 6,26E-01 | 8,33E-01 |
| <i>TCEAL5</i>          | -1,03 | 6,26E-01 | 8,33E-01 |
| <i>THC2271920</i>      | -1,02 | 6,27E-01 | 8,33E-01 |

|                        |       |          |          |
|------------------------|-------|----------|----------|
| <i>A_24_P367191</i>    | -1,02 | 6,26E-01 | 8,33E-01 |
| <i>KRT36</i>           | -1,02 | 6,27E-01 | 8,33E-01 |
| <i>IFT140</i>          | -1,02 | 6,27E-01 | 8,33E-01 |
| <i>OR10A2</i>          | -1,02 | 6,26E-01 | 8,33E-01 |
| <i>ZFAND2B</i>         | -1,02 | 6,27E-01 | 8,33E-01 |
| <i>BAT2D1</i>          | -1,02 | 6,26E-01 | 8,33E-01 |
| <i>NEK1</i>            | 1,01  | 6,26E-01 | 8,33E-01 |
| <i>A_24_P929835</i>    | 1,02  | 6,26E-01 | 8,33E-01 |
| <i>AF119848</i>        | 1,02  | 6,27E-01 | 8,33E-01 |
| <i>LOC285813</i>       | 1,02  | 6,27E-01 | 8,33E-01 |
| <i>NDUFS7</i>          | 1,02  | 6,27E-01 | 8,33E-01 |
| <i>TCP11</i>           | 1,02  | 6,27E-01 | 8,33E-01 |
| <i>THC2343435</i>      | 1,03  | 6,26E-01 | 8,33E-01 |
| <i>H1FX</i>            | 1,03  | 6,26E-01 | 8,33E-01 |
| <i>ENST00000320378</i> | 1,04  | 6,26E-01 | 8,33E-01 |
| <i>ENST00000381942</i> | -1,03 | 6,27E-01 | 8,33E-01 |
| <i>A_24_P549518</i>    | -1,03 | 6,27E-01 | 8,33E-01 |
| <i>CYP4F8</i>          | -1,03 | 6,27E-01 | 8,33E-01 |
| <i>RASD1</i>           | 1,14  | 6,27E-01 | 8,33E-01 |
| <i>A_24_P7570</i>      | 1,02  | 6,27E-01 | 8,33E-01 |
| <i>SLC23A2</i>         | -1,02 | 6,27E-01 | 8,33E-01 |
| <i>C4BPB</i>           | 1,02  | 6,27E-01 | 8,33E-01 |
| <i>TASP1</i>           | 1,02  | 6,27E-01 | 8,33E-01 |
| <i>A_23_P122481</i>    | -1,02 | 6,27E-01 | 8,33E-01 |
| <i>CPS1</i>            | -1,02 | 6,27E-01 | 8,33E-01 |
| <i>A_32_P202587</i>    | -1,01 | 6,27E-01 | 8,33E-01 |
| <i>RNF20</i>           | 1,02  | 6,27E-01 | 8,33E-01 |
| <i>THC2288322</i>      | -1,02 | 6,27E-01 | 8,33E-01 |
| <i>KCND3</i>           | 1,02  | 6,27E-01 | 8,33E-01 |
| <i>SPTBN5</i>          | 1,02  | 6,27E-01 | 8,33E-01 |
| <i>KDELR2</i>          | -1,06 | 6,27E-01 | 8,33E-01 |
| <i>ENST00000329156</i> | 1,02  | 6,27E-01 | 8,33E-01 |
| <i>BC020163</i>        | -1,18 | 6,27E-01 | 8,33E-01 |
| <i>MGC24039</i>        | 1,02  | 6,27E-01 | 8,33E-01 |
| <i>AF090941</i>        | -1,01 | 6,28E-01 | 8,33E-01 |
| <i>NCL</i>             | 1,01  | 6,28E-01 | 8,33E-01 |
| <i>C6orf168</i>        | 1,08  | 6,28E-01 | 8,33E-01 |
| <i>PRR10</i>           | 1,02  | 6,28E-01 | 8,33E-01 |
| <i>AF010236</i>        | 1,06  | 6,28E-01 | 8,33E-01 |
| <i>C10orf81</i>        | 1,02  | 6,28E-01 | 8,33E-01 |
| <i>A_24_P464528</i>    | 1,02  | 6,28E-01 | 8,33E-01 |
| <i>RPS5</i>            | -1,02 | 6,28E-01 | 8,33E-01 |
| <i>THC2340035</i>      | 1,02  | 6,28E-01 | 8,33E-01 |
| <i>A_24_P464273</i>    | 1,02  | 6,28E-01 | 8,33E-01 |

|                        |       |          |          |
|------------------------|-------|----------|----------|
| <i>CR597597</i>        | 1,25  | 6,28E-01 | 8,33E-01 |
| <i>THC2380864</i>      | 1,02  | 6,28E-01 | 8,34E-01 |
| <i>A_32_P885123</i>    | -1,02 | 6,28E-01 | 8,34E-01 |
| <i>PPARA</i>           | -1,02 | 6,28E-01 | 8,34E-01 |
| <i>RHBG</i>            | 1,02  | 6,28E-01 | 8,34E-01 |
| <i>CNKSR1</i>          | 1,02  | 6,28E-01 | 8,34E-01 |
| <i>TESK1</i>           | 1,02  | 6,28E-01 | 8,34E-01 |
| <i>A_24_P545807</i>    | -1,02 | 6,28E-01 | 8,34E-01 |
| <i>RAGE</i>            | -1,03 | 6,28E-01 | 8,34E-01 |
| <i>ENST00000293201</i> | -1,03 | 6,29E-01 | 8,34E-01 |
| <i>MAWBP</i>           | -1,02 | 6,29E-01 | 8,34E-01 |
| <i>FLJ21736</i>        | 1,01  | 6,28E-01 | 8,34E-01 |
| <i>MGC4618</i>         | 1,02  | 6,29E-01 | 8,34E-01 |
| <i>N4BP2</i>           | -1,02 | 6,29E-01 | 8,34E-01 |
| <i>PHTF2</i>           | 1,02  | 6,29E-01 | 8,34E-01 |
| <i>FBXL15</i>          | -1,02 | 6,29E-01 | 8,34E-01 |
| <i>FBXL20</i>          | 1,03  | 6,29E-01 | 8,34E-01 |
| <i>C1orf86</i>         | -1,02 | 6,29E-01 | 8,34E-01 |
| <i>THC2368255</i>      | -1,02 | 6,29E-01 | 8,34E-01 |
| <i>ENST00000357907</i> | 1,02  | 6,29E-01 | 8,34E-01 |
| <i>AK097045</i>        | 1,03  | 6,29E-01 | 8,34E-01 |
| <i>THC2271114</i>      | -1,02 | 6,29E-01 | 8,34E-01 |
| <i>RC2</i>             | -1,01 | 6,29E-01 | 8,34E-01 |
| <i>A_32_P21916</i>     | 1,03  | 6,29E-01 | 8,34E-01 |
| <i>FLJ23447</i>        | 1,03  | 6,29E-01 | 8,34E-01 |
| <i>C1orf85</i>         | 1,04  | 6,29E-01 | 8,34E-01 |
| <i>ST6GALNAC4</i>      | 1,01  | 6,29E-01 | 8,34E-01 |
| <i>L27175</i>          | 1,02  | 6,29E-01 | 8,35E-01 |
| <i>A_24_P936067</i>    | 1,02  | 6,30E-01 | 8,35E-01 |
| <i>TGM3</i>            | -1,07 | 6,30E-01 | 8,35E-01 |
| <i>AA512897</i>        | -1,01 | 6,30E-01 | 8,35E-01 |
| <i>AK056856</i>        | 1,01  | 6,30E-01 | 8,35E-01 |
| <i>DKFZP564J102</i>    | -1,02 | 6,30E-01 | 8,35E-01 |
| <i>AF088076</i>        | 1,08  | 6,30E-01 | 8,35E-01 |
| <i>A_32_P151570</i>    | -1,03 | 6,30E-01 | 8,35E-01 |
| <i>CCDC26</i>          | 1,02  | 6,30E-01 | 8,35E-01 |
| <i>AK025716</i>        | -1,02 | 6,30E-01 | 8,35E-01 |
| <i>GAL3ST2</i>         | -1,02 | 6,30E-01 | 8,35E-01 |
| <i>FBXO22</i>          | -1,02 | 6,30E-01 | 8,35E-01 |
| <i>A_24_P110521</i>    | -1,03 | 6,30E-01 | 8,35E-01 |
| <i>RER1</i>            | -1,02 | 6,30E-01 | 8,35E-01 |
| <i>A_24_P920664</i>    | -1,02 | 6,30E-01 | 8,35E-01 |
| <i>NP113496</i>        | -1,01 | 6,30E-01 | 8,35E-01 |
| <i>MRPS21</i>          | 1,01  | 6,30E-01 | 8,35E-01 |

|                        |       |          |          |
|------------------------|-------|----------|----------|
| <i>THC2277731</i>      | 1,02  | 6,30E-01 | 8,35E-01 |
| <i>BC041393</i>        | -1,02 | 6,30E-01 | 8,35E-01 |
| <i>AK097471</i>        | -1,04 | 6,31E-01 | 8,35E-01 |
| <i>IDUA</i>            | -1,03 | 6,31E-01 | 8,35E-01 |
| <i>FLJ14327</i>        | -1,03 | 6,31E-01 | 8,35E-01 |
| <i>MPST</i>            | -1,03 | 6,31E-01 | 8,35E-01 |
| <i>AK026836</i>        | -1,03 | 6,31E-01 | 8,35E-01 |
| <i>LOC348926</i>       | -1,02 | 6,31E-01 | 8,35E-01 |
| <i>CLDN19</i>          | -1,02 | 6,31E-01 | 8,35E-01 |
| <i>AL517186</i>        | -1,02 | 6,31E-01 | 8,35E-01 |
| <i>GEMIN5</i>          | -1,02 | 6,30E-01 | 8,35E-01 |
| <i>UBE2A</i>           | -1,02 | 6,31E-01 | 8,35E-01 |
| <i>THC2335535</i>      | -1,02 | 6,31E-01 | 8,35E-01 |
| <i>RC9</i>             | 1,01  | 6,31E-01 | 8,35E-01 |
| <i>CLEC4M</i>          | 1,01  | 6,31E-01 | 8,35E-01 |
| <i>RAB1B</i>           | 1,01  | 6,31E-01 | 8,35E-01 |
| <i>LUZP4</i>           | 1,01  | 6,31E-01 | 8,35E-01 |
| <i>A_24_P54230</i>     | 1,02  | 6,31E-01 | 8,35E-01 |
| <i>TMUB1</i>           | 1,02  | 6,31E-01 | 8,35E-01 |
| <i>A_24_P917897</i>    | 1,02  | 6,31E-01 | 8,35E-01 |
| <i>THC2311248</i>      | 1,02  | 6,31E-01 | 8,35E-01 |
| <i>AA574228</i>        | 1,02  | 6,31E-01 | 8,35E-01 |
| <i>CASP9</i>           | 1,02  | 6,31E-01 | 8,35E-01 |
| <i>LOC441748</i>       | 1,03  | 6,30E-01 | 8,35E-01 |
| <i>AF220234</i>        | 1,03  | 6,31E-01 | 8,35E-01 |
| <i>FAM38B</i>          | 1,04  | 6,31E-01 | 8,35E-01 |
| <i>BC036599</i>        | 1,04  | 6,31E-01 | 8,35E-01 |
| <i>SOHLH2</i>          | -1,03 | 6,31E-01 | 8,35E-01 |
| <i>WNT5B</i>           | -1,07 | 6,31E-01 | 8,35E-01 |
| <i>MGC26597</i>        | -1,02 | 6,31E-01 | 8,35E-01 |
| <i>CLN6</i>            | -1,02 | 6,31E-01 | 8,35E-01 |
| <i>A_24_P911482</i>    | 1,01  | 6,31E-01 | 8,35E-01 |
| <i>UBLCP1</i>          | 1,02  | 6,31E-01 | 8,35E-01 |
| <i>MFI2</i>            | 1,02  | 6,31E-01 | 8,35E-01 |
| <i>VIP</i>             | -1,06 | 6,32E-01 | 8,36E-01 |
| <i>KIAA1815</i>        | 1,01  | 6,32E-01 | 8,36E-01 |
| <i>AF219140</i>        | 1,02  | 6,32E-01 | 8,36E-01 |
| <i>ENST00000343505</i> | 1,04  | 6,32E-01 | 8,36E-01 |
| <i>CR594705</i>        | 1,05  | 6,32E-01 | 8,36E-01 |
| <i>NOL4</i>            | 1,02  | 6,32E-01 | 8,36E-01 |
| <i>SRY</i>             | 1,02  | 6,32E-01 | 8,36E-01 |
| <i>S100A9</i>          | -1,19 | 6,32E-01 | 8,36E-01 |
| <i>CAMK2A</i>          | -1,03 | 6,32E-01 | 8,36E-01 |
| <i>BANF1</i>           | -1,03 | 6,32E-01 | 8,36E-01 |

|                        |       |          |          |
|------------------------|-------|----------|----------|
| <i>PYCRL</i>           | -1,02 | 6,32E-01 | 8,36E-01 |
| <i>THAP7</i>           | -1,02 | 6,32E-01 | 8,36E-01 |
| <i>TRIM43</i>          | -1,01 | 6,32E-01 | 8,36E-01 |
| <i>A_24_P917074</i>    | 1,02  | 6,32E-01 | 8,36E-01 |
| <i>THC2337124</i>      | 1,02  | 6,32E-01 | 8,36E-01 |
| <i>BC015783</i>        | 1,05  | 6,32E-01 | 8,36E-01 |
| <i>BC038245</i>        | 1,07  | 6,32E-01 | 8,36E-01 |
| <i>MGC40574</i>        | 1,02  | 6,32E-01 | 8,36E-01 |
| <i>C12orf54</i>        | 1,06  | 6,32E-01 | 8,36E-01 |
| <i>COL3A1</i>          | -1,08 | 6,32E-01 | 8,36E-01 |
| <i>THC2313533</i>      | -1,03 | 6,32E-01 | 8,36E-01 |
| <i>RTN4</i>            | 1,02  | 6,32E-01 | 8,36E-01 |
| <i>A_23_P208609</i>    | 1,02  | 6,32E-01 | 8,36E-01 |
| <i>HHLA2</i>           | 1,01  | 6,33E-01 | 8,36E-01 |
| <i>COASY</i>           | -1,01 | 6,33E-01 | 8,36E-01 |
| <i>THC2441239</i>      | 1,04  | 6,33E-01 | 8,36E-01 |
| <i>EPS15L2</i>         | 1,03  | 6,33E-01 | 8,36E-01 |
| <i>COL6A3</i>          | -1,05 | 6,33E-01 | 8,36E-01 |
| <i>ENST00000222396</i> | -1,02 | 6,33E-01 | 8,36E-01 |
| <i>C21orf57</i>        | 1,03  | 6,33E-01 | 8,36E-01 |
| <i>A_24_P776036</i>    | 1,06  | 6,33E-01 | 8,36E-01 |
| <i>ENST00000354653</i> | -1,02 | 6,33E-01 | 8,36E-01 |
| <i>LOC643454</i>       | 1,02  | 6,33E-01 | 8,36E-01 |
| <i>CCL23</i>           | -1,07 | 6,33E-01 | 8,36E-01 |
| <i>THC2452121</i>      | 1,02  | 6,33E-01 | 8,36E-01 |
| <i>DDX53</i>           | -1,02 | 6,33E-01 | 8,36E-01 |
| <i>LOC399947</i>       | 1,01  | 6,33E-01 | 8,36E-01 |
| <i>AF091089</i>        | 1,02  | 6,33E-01 | 8,36E-01 |
| <i>A_24_P791553</i>    | 1,02  | 6,33E-01 | 8,36E-01 |
| <i>A_24_P247324</i>    | 1,02  | 6,33E-01 | 8,36E-01 |
| <i>C18orf25</i>        | 1,02  | 6,33E-01 | 8,36E-01 |
| <i>SPAG17</i>          | -1,04 | 6,33E-01 | 8,36E-01 |
| <i>ENST00000305402</i> | -1,02 | 6,33E-01 | 8,37E-01 |
| <i>MGC61571</i>        | -1,01 | 6,33E-01 | 8,37E-01 |
| <i>GRAMD1B</i>         | 1,01  | 6,33E-01 | 8,37E-01 |
| <i>LOC439990</i>       | 1,03  | 6,33E-01 | 8,37E-01 |
| <i>CR597260</i>        | 1,02  | 6,34E-01 | 8,37E-01 |
| <i>AL050131</i>        | 1,02  | 6,34E-01 | 8,37E-01 |
| <i>BE064950</i>        | -1,03 | 6,34E-01 | 8,37E-01 |
| <i>C8orf33</i>         | -1,02 | 6,34E-01 | 8,37E-01 |
| <i>AGPAT1</i>          | -1,02 | 6,34E-01 | 8,37E-01 |
| <i>BX091616</i>        | 1,01  | 6,34E-01 | 8,37E-01 |
| <i>MB</i>              | 1,07  | 6,34E-01 | 8,37E-01 |
| <i>THC2281837</i>      | -1,03 | 6,34E-01 | 8,37E-01 |



|                 |       |          |          |
|-----------------|-------|----------|----------|
| AU145652        | -1,02 | 6,34E-01 | 8,37E-01 |
| THC2289088      | -1,02 | 6,34E-01 | 8,37E-01 |
| AW502318        | -1,02 | 6,34E-01 | 8,37E-01 |
| ENST00000333605 | 1,02  | 6,34E-01 | 8,37E-01 |
| NR1H4           | 1,03  | 6,34E-01 | 8,37E-01 |
| THC2373778      | -1,04 | 6,34E-01 | 8,37E-01 |
| FLCN            | -1,02 | 6,34E-01 | 8,37E-01 |
| MET             | 1,03  | 6,34E-01 | 8,37E-01 |
| AF119839        | -1,04 | 6,34E-01 | 8,37E-01 |
| A_24_P306788    | 1,02  | 6,34E-01 | 8,37E-01 |
| NUDT8           | 1,02  | 6,34E-01 | 8,37E-01 |
| ADFP            | -1,04 | 6,35E-01 | 8,37E-01 |
| CXCL10          | -1,08 | 6,35E-01 | 8,37E-01 |
| PPFIA1          | -1,02 | 6,35E-01 | 8,37E-01 |
| DGKZ            | -1,05 | 6,35E-01 | 8,37E-01 |
| A_24_P33403     | 1,02  | 6,35E-01 | 8,37E-01 |
| BX103476        | -1,02 | 6,35E-01 | 8,37E-01 |
| ENST00000381924 | 1,04  | 6,35E-01 | 8,38E-01 |
| SLC4A9          | -1,02 | 6,35E-01 | 8,38E-01 |
| THC2460959      | -1,05 | 6,35E-01 | 8,38E-01 |
| THC2317353      | -1,02 | 6,35E-01 | 8,38E-01 |
| AF130099        | -1,02 | 6,35E-01 | 8,38E-01 |
| CPA5            | -1,02 | 6,35E-01 | 8,38E-01 |
| BG001037        | -1,05 | 6,35E-01 | 8,38E-01 |
| DKFZP761M1511   | -1,03 | 6,35E-01 | 8,38E-01 |
| A_24_P221105    | -1,04 | 6,35E-01 | 8,38E-01 |
| ST6GALNAC3      | -1,04 | 6,35E-01 | 8,38E-01 |
| PCLKC           | -1,03 | 6,35E-01 | 8,38E-01 |
| THC2339105      | -1,02 | 6,35E-01 | 8,38E-01 |
| AI818152        | -1,02 | 6,35E-01 | 8,38E-01 |
| PRODH           | 1,03  | 6,35E-01 | 8,38E-01 |
| ENST00000327652 | 1,02  | 6,35E-01 | 8,38E-01 |
| AL110237        | -1,02 | 6,36E-01 | 8,38E-01 |
| BC026109        | -1,02 | 6,36E-01 | 8,38E-01 |
| A_23_P95125     | -1,04 | 6,36E-01 | 8,38E-01 |
| CSN3            | -1,03 | 6,36E-01 | 8,38E-01 |
| THC2382283      | -1,02 | 6,36E-01 | 8,38E-01 |
| AK124328        | -1,02 | 6,36E-01 | 8,38E-01 |
| PRSS15          | 1,02  | 6,36E-01 | 8,38E-01 |
| THC2412411      | 1,02  | 6,36E-01 | 8,38E-01 |
| ARHGAP27        | 1,02  | 6,36E-01 | 8,38E-01 |
| CACNA1F         | 1,02  | 6,36E-01 | 8,38E-01 |
| THC2265685      | -1,02 | 6,36E-01 | 8,38E-01 |
| A_24_P919340    | -1,02 | 6,36E-01 | 8,38E-01 |

|                     |       |          |          |
|---------------------|-------|----------|----------|
| <i>LOC644421</i>    | 1,02  | 6,36E-01 | 8,38E-01 |
| <i>AI380795</i>     | 1,04  | 6,36E-01 | 8,38E-01 |
| <i>AW015664</i>     | 1,02  | 6,36E-01 | 8,38E-01 |
| <i>THC2460394</i>   | -1,02 | 6,36E-01 | 8,38E-01 |
| <i>MGC39545</i>     | -1,02 | 6,36E-01 | 8,38E-01 |
| <i>SGCG</i>         | -1,09 | 6,36E-01 | 8,38E-01 |
| <i>C4orf26</i>      | -1,02 | 6,36E-01 | 8,38E-01 |
| <i>AF147302</i>     | 1,02  | 6,36E-01 | 8,38E-01 |
| <i>THC2281662</i>   | 1,02  | 6,37E-01 | 8,38E-01 |
| <i>NPEPPS</i>       | 1,02  | 6,37E-01 | 8,38E-01 |
| <i>MGC16291</i>     | 1,03  | 6,37E-01 | 8,38E-01 |
| <i>A_23_P1871</i>   | 1,02  | 6,37E-01 | 8,38E-01 |
| <i>A_24_P914986</i> | -1,02 | 6,37E-01 | 8,38E-01 |
| <i>PCDHGB6</i>      | 1,02  | 6,37E-01 | 8,39E-01 |
| <i>CB240827</i>     | -1,02 | 6,37E-01 | 8,39E-01 |
| <i>MCM10</i>        | -1,01 | 6,37E-01 | 8,39E-01 |
| <i>MYEOV2</i>       | 1,01  | 6,37E-01 | 8,39E-01 |
| <i>THC2448300</i>   | 1,02  | 6,37E-01 | 8,39E-01 |
| <i>AK096500</i>     | 1,02  | 6,37E-01 | 8,39E-01 |
| <i>SART1</i>        | -1,02 | 6,37E-01 | 8,39E-01 |
| <i>A_24_P932369</i> | 1,02  | 6,37E-01 | 8,39E-01 |
| <i>C14orf94</i>     | 1,02  | 6,37E-01 | 8,39E-01 |
| <i>LGALS7</i>       | 1,20  | 6,37E-01 | 8,39E-01 |
| <i>BG216229</i>     | -1,03 | 6,37E-01 | 8,39E-01 |
| <i>FAM83A</i>       | 1,02  | 6,37E-01 | 8,39E-01 |
| <i>QSCN6</i>        | 1,05  | 6,37E-01 | 8,39E-01 |
| <i>SMPX</i>         | 1,11  | 6,37E-01 | 8,39E-01 |
| <i>BG011034</i>     | -1,02 | 6,37E-01 | 8,39E-01 |
| <i>CHAC2</i>        | -1,02 | 6,37E-01 | 8,39E-01 |
| <i>ADK</i>          | 1,02  | 6,37E-01 | 8,39E-01 |
| <i>BC089388</i>     | 1,03  | 6,37E-01 | 8,39E-01 |
| <i>THC2288058</i>   | -1,02 | 6,37E-01 | 8,39E-01 |
| <i>THC2404251</i>   | -1,02 | 6,38E-01 | 8,39E-01 |
| <i>C1orf53</i>      | -1,05 | 6,38E-01 | 8,39E-01 |
| <i>DCPS</i>         | -1,02 | 6,38E-01 | 8,39E-01 |
| <i>CB047924</i>     | -1,02 | 6,38E-01 | 8,39E-01 |
| <i>PTPN22</i>       | -1,02 | 6,38E-01 | 8,39E-01 |
| <i>AF334792</i>     | 1,02  | 6,38E-01 | 8,39E-01 |
| <i>APH1A</i>        | 1,02  | 6,38E-01 | 8,39E-01 |
| <i>THOP1</i>        | 1,02  | 6,38E-01 | 8,39E-01 |
| <i>A_24_P50696</i>  | 1,03  | 6,38E-01 | 8,39E-01 |
| <i>BC015903</i>     | -1,02 | 6,38E-01 | 8,39E-01 |
| <i>VAMP5</i>        | 1,02  | 6,38E-01 | 8,39E-01 |
| <i>FIGN</i>         | 1,02  | 6,38E-01 | 8,39E-01 |

|                        |       |          |          |
|------------------------|-------|----------|----------|
| <i>AK023928</i>        | 1,03  | 6,38E-01 | 8,39E-01 |
| <i>TAC4</i>            | 1,03  | 6,38E-01 | 8,39E-01 |
| <i>A_24_P273284</i>    | -1,05 | 6,38E-01 | 8,39E-01 |
| <i>MKRN3</i>           | -1,04 | 6,38E-01 | 8,39E-01 |
| <i>RAB3D</i>           | -1,02 | 6,38E-01 | 8,39E-01 |
| <i>WDR55</i>           | 1,01  | 6,38E-01 | 8,39E-01 |
| <i>PQLC1</i>           | 1,02  | 6,38E-01 | 8,39E-01 |
| <i>KGFLP1</i>          | 1,04  | 6,38E-01 | 8,39E-01 |
| <i>CF272540</i>        | 1,04  | 6,38E-01 | 8,39E-01 |
| <i>NANS</i>            | 1,03  | 6,39E-01 | 8,39E-01 |
| <i>BQ777622</i>        | 1,05  | 6,39E-01 | 8,39E-01 |
| <i>IGBP1</i>           | -1,04 | 6,39E-01 | 8,39E-01 |
| <i>CACNA2D3</i>        | -1,03 | 6,39E-01 | 8,39E-01 |
| <i>AW075437</i>        | -1,02 | 6,39E-01 | 8,39E-01 |
| <i>RICS</i>            | -1,02 | 6,39E-01 | 8,39E-01 |
| <i>AZI2</i>            | 1,02  | 6,39E-01 | 8,39E-01 |
| <i>MYLK2</i>           | -1,03 | 6,39E-01 | 8,39E-01 |
| <i>A_24_P921857</i>    | -1,02 | 6,39E-01 | 8,40E-01 |
| <i>LOC643648</i>       | -1,02 | 6,39E-01 | 8,40E-01 |
| <i>CD607715</i>        | -1,02 | 6,39E-01 | 8,40E-01 |
| <i>A_32_P68659</i>     | -1,02 | 6,39E-01 | 8,40E-01 |
| <i>GOLGA2L1</i>        | -1,02 | 6,39E-01 | 8,40E-01 |
| <i>A_32_P9146</i>      | -1,02 | 6,39E-01 | 8,40E-01 |
| <i>XAB2</i>            | -1,02 | 6,39E-01 | 8,40E-01 |
| <i>HDAC6</i>           | -1,02 | 6,39E-01 | 8,40E-01 |
| <i>BC062294</i>        | 1,02  | 6,39E-01 | 8,40E-01 |
| <i>CAMP</i>            | -1,03 | 6,39E-01 | 8,40E-01 |
| <i>KIAA1328</i>        | -1,01 | 6,39E-01 | 8,40E-01 |
| <i>PRO1848</i>         | 1,02  | 6,40E-01 | 8,40E-01 |
| <i>THC2399272</i>      | 1,02  | 6,40E-01 | 8,40E-01 |
| <i>AK097430</i>        | 1,02  | 6,39E-01 | 8,40E-01 |
| <i>SPOCK3</i>          | 1,02  | 6,39E-01 | 8,40E-01 |
| <i>FGL2</i>            | 1,04  | 6,39E-01 | 8,40E-01 |
| <i>USP11</i>           | -1,02 | 6,40E-01 | 8,40E-01 |
| <i>A_24_P92722</i>     | 1,01  | 6,40E-01 | 8,40E-01 |
| <i>ANXA3</i>           | 1,04  | 6,40E-01 | 8,40E-01 |
| <i>AP3B1</i>           | -1,02 | 6,40E-01 | 8,40E-01 |
| <i>PMVK</i>            | 1,02  | 6,40E-01 | 8,40E-01 |
| <i>ENST00000316149</i> | -1,03 | 6,40E-01 | 8,40E-01 |
| <i>RSN</i>             | 1,03  | 6,40E-01 | 8,40E-01 |
| <i>CD241953</i>        | -1,03 | 6,40E-01 | 8,40E-01 |
| <i>THC2460656</i>      | 1,04  | 6,40E-01 | 8,41E-01 |
| <i>SQSTM1</i>          | 1,03  | 6,40E-01 | 8,41E-01 |
| <i>ENST00000336112</i> | -1,02 | 6,41E-01 | 8,41E-01 |

|                        |       |          |          |
|------------------------|-------|----------|----------|
| <i>A_24_P919595</i>    | -1,02 | 6,41E-01 | 8,41E-01 |
| <i>RGS2</i>            | -1,08 | 6,41E-01 | 8,41E-01 |
| <i>BG993059</i>        | 1,02  | 6,41E-01 | 8,41E-01 |
| <i>NQO1</i>            | 1,02  | 6,41E-01 | 8,41E-01 |
| <i>LOC375133</i>       | -1,03 | 6,41E-01 | 8,41E-01 |
| <i>RPUSD1</i>          | 1,02  | 6,41E-01 | 8,41E-01 |
| <i>RASAL1</i>          | -1,02 | 6,41E-01 | 8,41E-01 |
| <i>AV749257</i>        | 1,02  | 6,41E-01 | 8,41E-01 |
| <i>FLJ32363</i>        | -1,02 | 6,41E-01 | 8,42E-01 |
| <i>CTBP2</i>           | -1,03 | 6,41E-01 | 8,42E-01 |
| <i>ABO</i>             | -1,02 | 6,42E-01 | 8,42E-01 |
| <i>KRTAP11-1</i>       | 1,01  | 6,42E-01 | 8,42E-01 |
| <i>SLC38A4</i>         | 1,02  | 6,42E-01 | 8,42E-01 |
| <i>BX457454</i>        | 1,02  | 6,42E-01 | 8,42E-01 |
| <i>MLLT6</i>           | 1,02  | 6,42E-01 | 8,42E-01 |
| <i>FLJ20582</i>        | 1,02  | 6,42E-01 | 8,42E-01 |
| <i>C20orf102</i>       | 1,06  | 6,42E-01 | 8,42E-01 |
| <i>THC2348147</i>      | -1,01 | 6,42E-01 | 8,42E-01 |
| <i>A_24_P887695</i>    | 1,02  | 6,42E-01 | 8,42E-01 |
| <i>ZNF664</i>          | 1,02  | 6,42E-01 | 8,42E-01 |
| <i>DDEFL1</i>          | -1,03 | 6,42E-01 | 8,42E-01 |
| <i>OSCAR</i>           | 1,02  | 6,42E-01 | 8,42E-01 |
| <i>C14orf177</i>       | -1,02 | 6,42E-01 | 8,42E-01 |
| <i>ENST00000366716</i> | 1,02  | 6,42E-01 | 8,42E-01 |
| <i>TACC2</i>           | -1,03 | 6,42E-01 | 8,42E-01 |
| <i>THC2406099</i>      | -1,02 | 6,42E-01 | 8,42E-01 |
| <i>AF119881</i>        | 1,01  | 6,42E-01 | 8,42E-01 |
| <i>THC2404913</i>      | 1,02  | 6,42E-01 | 8,42E-01 |
| <i>AK055981</i>        | -1,05 | 6,43E-01 | 8,42E-01 |
| <i>SIM2</i>            | -1,04 | 6,43E-01 | 8,42E-01 |
| <i>NIFUN</i>           | -1,02 | 6,42E-01 | 8,42E-01 |
| <i>A_24_P820081</i>    | -1,02 | 6,43E-01 | 8,42E-01 |
| <i>CR622308</i>        | 1,03  | 6,43E-01 | 8,42E-01 |
| <i>AF090906</i>        | 1,02  | 6,43E-01 | 8,42E-01 |
| <i>SCN1A</i>           | 1,02  | 6,43E-01 | 8,42E-01 |
| <i>DGKI</i>            | 1,02  | 6,43E-01 | 8,42E-01 |
| <i>AL137292</i>        | -1,02 | 6,43E-01 | 8,43E-01 |
| <i>A_24_P925518</i>    | -1,02 | 6,43E-01 | 8,43E-01 |
| <i>PAFAH1B1</i>        | 1,01  | 6,43E-01 | 8,43E-01 |
| <i>A_24_P298099</i>    | -1,06 | 6,43E-01 | 8,43E-01 |
| <i>CIAPIN1</i>         | -1,02 | 6,43E-01 | 8,43E-01 |
| <i>HERC2P4</i>         | -1,03 | 6,43E-01 | 8,43E-01 |
| <i>ENST00000373524</i> | -1,02 | 6,43E-01 | 8,43E-01 |
| <i>GDDR</i>            | 1,02  | 6,43E-01 | 8,43E-01 |

|                        |       |          |          |
|------------------------|-------|----------|----------|
| <i>AW518445</i>        | 1,02  | 6,43E-01 | 8,43E-01 |
| <i>AK094296</i>        | -1,04 | 6,43E-01 | 8,43E-01 |
| <i>NUDT4</i>           | -1,02 | 6,43E-01 | 8,43E-01 |
| <i>C3orf21</i>         | 1,01  | 6,43E-01 | 8,43E-01 |
| <i>TSSK4</i>           | -1,03 | 6,44E-01 | 8,43E-01 |
| <i>ENST00000334122</i> | -1,04 | 6,44E-01 | 8,43E-01 |
| <i>LOC338805</i>       | 1,02  | 6,44E-01 | 8,43E-01 |
| <i>BARX2</i>           | -1,03 | 6,44E-01 | 8,43E-01 |
| <i>MFSD3</i>           | -1,02 | 6,44E-01 | 8,43E-01 |
| <i>CAPN10</i>          | -1,01 | 6,44E-01 | 8,43E-01 |
| <i>CALCOCO2</i>        | 1,01  | 6,44E-01 | 8,43E-01 |
| <i>CRYBA1</i>          | 1,04  | 6,44E-01 | 8,43E-01 |
| <i>AL137560</i>        | -1,01 | 6,44E-01 | 8,43E-01 |
| <i>SHC1</i>            | 1,02  | 6,44E-01 | 8,43E-01 |
| <i>A_24_P307395</i>    | 1,02  | 6,44E-01 | 8,43E-01 |
| <i>A_24_P926337</i>    | 1,02  | 6,44E-01 | 8,43E-01 |
| <i>KIF17</i>           | -1,02 | 6,44E-01 | 8,43E-01 |
| <i>AK075186</i>        | 1,04  | 6,44E-01 | 8,43E-01 |
| <i>BC018675</i>        | -1,03 | 6,45E-01 | 8,44E-01 |
| <i>ENST00000244321</i> | -1,02 | 6,45E-01 | 8,44E-01 |
| <i>ARHGEF11</i>        | -1,01 | 6,45E-01 | 8,44E-01 |
| <i>CNOT10</i>          | 1,01  | 6,45E-01 | 8,44E-01 |
| <i>THC2360912</i>      | 1,02  | 6,45E-01 | 8,44E-01 |
| <i>BTD</i>             | -1,02 | 6,45E-01 | 8,44E-01 |
| <i>CTAGE6</i>          | -1,02 | 6,45E-01 | 8,44E-01 |
| <i>GPR6</i>            | 1,02  | 6,45E-01 | 8,44E-01 |
| <i>OR2V2</i>           | 1,02  | 6,45E-01 | 8,44E-01 |
| <i>NTS</i>             | 1,07  | 6,45E-01 | 8,44E-01 |
| <i>HS6ST2</i>          | 1,07  | 6,45E-01 | 8,44E-01 |
| <i>A_24_P925010</i>    | -1,02 | 6,45E-01 | 8,44E-01 |
| <i>FLJ30901</i>        | -1,04 | 6,45E-01 | 8,44E-01 |
| <i>A_24_P340966</i>    | 1,01  | 6,45E-01 | 8,44E-01 |
| <i>KIAA1109</i>        | 1,02  | 6,45E-01 | 8,44E-01 |
| <i>CETN1</i>           | 1,02  | 6,45E-01 | 8,44E-01 |
| <i>A_23_P47220</i>     | -1,04 | 6,45E-01 | 8,44E-01 |
| <i>AI382322</i>        | -1,04 | 6,45E-01 | 8,44E-01 |
| <i>BQ004014</i>        | -1,03 | 6,45E-01 | 8,44E-01 |
| <i>MSH4</i>            | -1,03 | 6,45E-01 | 8,44E-01 |
| <i>ZCCHC6</i>          | -1,01 | 6,45E-01 | 8,44E-01 |
| <i>SPAG16</i>          | 1,01  | 6,45E-01 | 8,44E-01 |
| <i>TMEM107</i>         | 1,02  | 6,45E-01 | 8,44E-01 |
| <i>SOCS5</i>           | 1,02  | 6,45E-01 | 8,44E-01 |
| <i>MICAL1</i>          | 1,02  | 6,45E-01 | 8,44E-01 |
| <i>A_24_P594293</i>    | 1,03  | 6,45E-01 | 8,44E-01 |

|                        |       |          |          |
|------------------------|-------|----------|----------|
| <i>CHRNA10</i>         | 1,03  | 6,45E-01 | 8,44E-01 |
| <i>THC2281068</i>      | 1,02  | 6,45E-01 | 8,44E-01 |
| <i>CBLN4</i>           | -1,03 | 6,46E-01 | 8,44E-01 |
| <i>AF119866</i>        | -1,02 | 6,46E-01 | 8,44E-01 |
| <i>WFDC10A</i>         | -1,02 | 6,46E-01 | 8,44E-01 |
| <i>CNIH</i>            | -1,02 | 6,46E-01 | 8,44E-01 |
| <i>IL22</i>            | 1,02  | 6,46E-01 | 8,44E-01 |
| <i>PHEX</i>            | 1,02  | 6,46E-01 | 8,44E-01 |
| <i>AASS</i>            | 1,02  | 6,46E-01 | 8,44E-01 |
| <i>A_32_P211765</i>    | 1,03  | 6,46E-01 | 8,44E-01 |
| <i>OCIAD2</i>          | 1,05  | 6,46E-01 | 8,44E-01 |
| <i>KLHL24</i>          | -1,03 | 6,46E-01 | 8,44E-01 |
| <i>ACTR6</i>           | 1,02  | 6,46E-01 | 8,44E-01 |
| <i>AK123757</i>        | 1,03  | 6,46E-01 | 8,44E-01 |
| <i>DMRTB1</i>          | -1,01 | 6,46E-01 | 8,44E-01 |
| <i>A_24_P213175</i>    | -1,01 | 6,46E-01 | 8,44E-01 |
| <i>A_24_P891042</i>    | -1,02 | 6,46E-01 | 8,44E-01 |
| <i>SOX14</i>           | 1,01  | 6,46E-01 | 8,44E-01 |
| <i>ENST00000257951</i> | 1,02  | 6,46E-01 | 8,44E-01 |
| <i>A_24_P745883</i>    | -1,04 | 6,46E-01 | 8,44E-01 |
| <i>WDR31</i>           | -1,02 | 6,46E-01 | 8,44E-01 |
| <i>TPCN1</i>           | -1,02 | 6,46E-01 | 8,44E-01 |
| <i>CHCHD6</i>          | 1,02  | 6,46E-01 | 8,44E-01 |
| <i>ENST00000250499</i> | 1,02  | 6,46E-01 | 8,44E-01 |
| <i>BAAT</i>            | 1,02  | 6,46E-01 | 8,44E-01 |
| <i>THC2273930</i>      | -1,02 | 6,46E-01 | 8,44E-01 |
| <i>C9orf85</i>         | 1,02  | 6,46E-01 | 8,44E-01 |
| <i>CB852325</i>        | 1,02  | 6,46E-01 | 8,44E-01 |
| <i>A_24_P942036</i>    | -1,02 | 6,47E-01 | 8,45E-01 |
| <i>THC2416246</i>      | -1,02 | 6,47E-01 | 8,45E-01 |
| <i>GPR120</i>          | 1,02  | 6,47E-01 | 8,45E-01 |
| <i>FRMPD3</i>          | 1,02  | 6,47E-01 | 8,45E-01 |
| <i>A_23_P71179</i>     | -1,02 | 6,47E-01 | 8,45E-01 |
| <i>SYTL3</i>           | -1,05 | 6,47E-01 | 8,45E-01 |
| <i>CRR9</i>            | 1,02  | 6,47E-01 | 8,45E-01 |
| <i>HS1BP3</i>          | 1,03  | 6,47E-01 | 8,45E-01 |
| <i>CTNNAL1</i>         | 1,02  | 6,47E-01 | 8,45E-01 |
| <i>SCGN</i>            | -1,02 | 6,47E-01 | 8,45E-01 |
| <i>RFX4</i>            | 1,01  | 6,47E-01 | 8,45E-01 |
| <i>ATP5J2</i>          | 1,02  | 6,47E-01 | 8,45E-01 |
| <i>AK022155</i>        | -1,02 | 6,48E-01 | 8,45E-01 |
| <i>BX116245</i>        | 1,01  | 6,48E-01 | 8,45E-01 |
| <i>FAM79A</i>          | -1,02 | 6,48E-01 | 8,45E-01 |
| <i>TP53I13</i>         | 1,01  | 6,48E-01 | 8,45E-01 |

|                        |       |          |          |
|------------------------|-------|----------|----------|
| <i>THC2321060</i>      | -1,07 | 6,48E-01 | 8,45E-01 |
| <i>C6orf120</i>        | -1,02 | 6,48E-01 | 8,45E-01 |
| <i>DAGLBETA</i>        | -1,02 | 6,48E-01 | 8,45E-01 |
| <i>AF130069</i>        | 1,02  | 6,48E-01 | 8,45E-01 |
| <i>A_23_P257881</i>    | 1,02  | 6,48E-01 | 8,45E-01 |
| <i>NR2C2</i>           | -1,02 | 6,48E-01 | 8,46E-01 |
| <i>ZDHHC5</i>          | 1,01  | 6,48E-01 | 8,46E-01 |
| <i>EIF3S6</i>          | -1,03 | 6,48E-01 | 8,46E-01 |
| <i>SSNA1</i>           | 1,01  | 6,48E-01 | 8,46E-01 |
| <i>ENST00000269142</i> | -1,03 | 6,48E-01 | 8,46E-01 |
| <i>CPNE6</i>           | -1,06 | 6,48E-01 | 8,46E-01 |
| <i>REPS2</i>           | -1,04 | 6,48E-01 | 8,46E-01 |
| <i>A_32_P22679</i>     | -1,03 | 6,48E-01 | 8,46E-01 |
| <i>THC2436337</i>      | -1,02 | 6,48E-01 | 8,46E-01 |
| <i>BC007306</i>        | -1,02 | 6,48E-01 | 8,46E-01 |
| <i>A_32_P205407</i>    | 1,01  | 6,48E-01 | 8,46E-01 |
| <i>AK096849</i>        | 1,02  | 6,48E-01 | 8,46E-01 |
| <i>ZBTB16</i>          | -1,06 | 6,48E-01 | 8,46E-01 |
| <i>THC2374505</i>      | -1,06 | 6,48E-01 | 8,46E-01 |
| <i>AK058117</i>        | -1,02 | 6,48E-01 | 8,46E-01 |
| <i>THC2375527</i>      | 1,02  | 6,49E-01 | 8,46E-01 |
| <i>IFI44</i>           | -1,04 | 6,49E-01 | 8,46E-01 |
| <i>A_24_P917686</i>    | 1,01  | 6,49E-01 | 8,46E-01 |
| <i>A_32_P86009</i>     | 1,02  | 6,49E-01 | 8,46E-01 |
| <i>LCE3C</i>           | -1,03 | 6,49E-01 | 8,46E-01 |
| <i>PGCP</i>            | -1,03 | 6,49E-01 | 8,46E-01 |
| <i>OR8U1</i>           | -1,02 | 6,49E-01 | 8,46E-01 |
| <i>CYP11A1</i>         | -1,02 | 6,49E-01 | 8,46E-01 |
| <i>CBWD3</i>           | -1,02 | 6,49E-01 | 8,46E-01 |
| <i>SOX6</i>            | 1,01  | 6,49E-01 | 8,46E-01 |
| <i>C14orf168</i>       | -1,07 | 6,49E-01 | 8,46E-01 |
| <i>MRPL36</i>          | 1,01  | 6,49E-01 | 8,46E-01 |
| <i>C18orf10</i>        | 1,02  | 6,49E-01 | 8,46E-01 |
| <i>MDH2</i>            | 1,02  | 6,49E-01 | 8,46E-01 |
| <i>DNAJC14</i>         | -1,02 | 6,49E-01 | 8,46E-01 |
| <i>THC2358450</i>      | -1,02 | 6,49E-01 | 8,46E-01 |
| <i>THC2445789</i>      | 1,02  | 6,49E-01 | 8,46E-01 |
| <i>C17orf49</i>        | 1,02  | 6,49E-01 | 8,46E-01 |
| <i>A_24_P118391</i>    | 1,04  | 6,49E-01 | 8,46E-01 |
| <i>TMEM63A</i>         | 1,02  | 6,50E-01 | 8,47E-01 |
| <i>EME2</i>            | 1,02  | 6,50E-01 | 8,47E-01 |
| <i>ZCRB1</i>           | 1,02  | 6,50E-01 | 8,47E-01 |
| <i>BC002470</i>        | 1,02  | 6,50E-01 | 8,47E-01 |
| <i>DARS</i>            | 1,02  | 6,50E-01 | 8,47E-01 |

|                     |       |          |          |
|---------------------|-------|----------|----------|
| <i>DNTT</i>         | 1,02  | 6,50E-01 | 8,47E-01 |
| <i>AL355688</i>     | -1,05 | 6,50E-01 | 8,47E-01 |
| <i>AF119900</i>     | -1,02 | 6,50E-01 | 8,47E-01 |
| <i>AI627917</i>     | -1,02 | 6,50E-01 | 8,47E-01 |
| <i>CLCN3</i>        | 1,02  | 6,50E-01 | 8,47E-01 |
| <i>WIPI2</i>        | 1,02  | 6,50E-01 | 8,47E-01 |
| <i>VASH1</i>        | -1,03 | 6,50E-01 | 8,47E-01 |
| <i>LOC391124</i>    | 1,04  | 6,50E-01 | 8,47E-01 |
| <i>IGFBP4</i>       | -1,04 | 6,50E-01 | 8,47E-01 |
| <i>POLQ</i>         | -1,03 | 6,50E-01 | 8,47E-01 |
| <i>SLC5A10</i>      | -1,02 | 6,50E-01 | 8,47E-01 |
| <i>A_24_P780609</i> | -1,01 | 6,51E-01 | 8,47E-01 |
| <i>R25063</i>       | 1,02  | 6,51E-01 | 8,47E-01 |
| <i>AF289601</i>     | 1,02  | 6,51E-01 | 8,47E-01 |
| <i>LCE3B</i>        | -1,06 | 6,51E-01 | 8,47E-01 |
| <i>RBP4</i>         | -1,05 | 6,51E-01 | 8,47E-01 |
| <i>STK10</i>        | -1,02 | 6,51E-01 | 8,47E-01 |
| <i>C20orf29</i>     | -1,02 | 6,51E-01 | 8,47E-01 |
| <i>CGB2</i>         | -1,02 | 6,51E-01 | 8,47E-01 |
| <i>YWHAE</i>        | -1,01 | 6,51E-01 | 8,47E-01 |
| <i>CB854750</i>     | -1,01 | 6,51E-01 | 8,47E-01 |
| <i>BC035179</i>     | 1,03  | 6,51E-01 | 8,47E-01 |
| <i>LOC150763</i>    | 1,05  | 6,51E-01 | 8,47E-01 |
| <i>CST1</i>         | -1,02 | 6,51E-01 | 8,47E-01 |
| <i>SLC4A2</i>       | -1,02 | 6,51E-01 | 8,47E-01 |
| <i>UGT3A2</i>       | -1,02 | 6,51E-01 | 8,47E-01 |
| <i>LOC643433</i>    | -1,01 | 6,51E-01 | 8,47E-01 |
| <i>THC2320516</i>   | 1,01  | 6,51E-01 | 8,47E-01 |
| <i>A_24_P120381</i> | 1,02  | 6,51E-01 | 8,47E-01 |
| <i>C19orf43</i>     | 1,02  | 6,51E-01 | 8,47E-01 |
| <i>THC2242016</i>   | 1,02  | 6,51E-01 | 8,47E-01 |
| <i>A_32_P55586</i>  | 1,02  | 6,51E-01 | 8,47E-01 |
| <i>SDC4</i>         | 1,08  | 6,51E-01 | 8,47E-01 |
| <i>WDR35</i>        | 1,02  | 6,51E-01 | 8,47E-01 |
| <i>DDX1</i>         | -1,01 | 6,52E-01 | 8,48E-01 |
| <i>BC015876</i>     | -1,01 | 6,52E-01 | 8,48E-01 |
| <i>CR613944</i>     | -1,04 | 6,52E-01 | 8,48E-01 |
| <i>CYP27B1</i>      | -1,03 | 6,52E-01 | 8,48E-01 |
| <i>A_23_P117943</i> | -1,02 | 6,52E-01 | 8,48E-01 |
| <i>IQCG</i>         | -1,01 | 6,52E-01 | 8,48E-01 |
| <i>THC2334047</i>   | 1,02  | 6,52E-01 | 8,48E-01 |
| <i>AK097085</i>     | 1,03  | 6,52E-01 | 8,48E-01 |
| <i>APPBP1</i>       | -1,02 | 6,52E-01 | 8,48E-01 |
| <i>EXDL1</i>        | -1,01 | 6,52E-01 | 8,48E-01 |



|                        |       |          |          |
|------------------------|-------|----------|----------|
| <i>NUDT18</i>          | -1,03 | 6,52E-01 | 8,48E-01 |
| <i>ENST00000261651</i> | -1,01 | 6,52E-01 | 8,48E-01 |
| <i>C10orf128</i>       | 1,03  | 6,52E-01 | 8,48E-01 |
| <i>MAP2K1</i>          | -1,02 | 6,52E-01 | 8,48E-01 |
| <i>THC2341263</i>      | 1,02  | 6,52E-01 | 8,48E-01 |
| <i>BC031919</i>        | 1,02  | 6,52E-01 | 8,48E-01 |
| <i>AK025252</i>        | 1,02  | 6,52E-01 | 8,48E-01 |
| <i>GYS2</i>            | 1,02  | 6,52E-01 | 8,48E-01 |
| <i>HAPLN4</i>          | -1,01 | 6,52E-01 | 8,48E-01 |
| <i>AF161558</i>        | 1,02  | 6,52E-01 | 8,48E-01 |
| <i>AI085037</i>        | -1,03 | 6,52E-01 | 8,48E-01 |
| <i>TRPC7</i>           | -1,02 | 6,53E-01 | 8,48E-01 |
| <i>A_24_P84711</i>     | -1,02 | 6,53E-01 | 8,48E-01 |
| <i>A_24_P919063</i>    | 1,02  | 6,53E-01 | 8,48E-01 |
| <i>ENST00000380682</i> | 1,02  | 6,53E-01 | 8,48E-01 |
| <i>A_32_P122962</i>    | 1,02  | 6,53E-01 | 8,48E-01 |
| <i>A_24_P937806</i>    | 1,03  | 6,53E-01 | 8,48E-01 |
| <i>C20orf59</i>        | -1,05 | 6,53E-01 | 8,48E-01 |
| <i>NP074673</i>        | -1,02 | 6,53E-01 | 8,48E-01 |
| <i>C14orf178</i>       | -1,02 | 6,53E-01 | 8,48E-01 |
| <i>AA601031</i>        | -1,03 | 6,53E-01 | 8,48E-01 |
| <i>BU624603</i>        | -1,03 | 6,53E-01 | 8,48E-01 |
| <i>CMAS</i>            | -1,02 | 6,53E-01 | 8,48E-01 |
| <i>BC021184</i>        | -1,02 | 6,53E-01 | 8,48E-01 |
| <i>BG058000</i>        | 1,02  | 6,53E-01 | 8,48E-01 |
| <i>XPC</i>             | 1,02  | 6,53E-01 | 8,48E-01 |
| <i>PER3</i>            | 1,04  | 6,53E-01 | 8,48E-01 |
| <i>A_24_P25063</i>     | 1,06  | 6,53E-01 | 8,48E-01 |
| <i>RTN4RL2</i>         | 1,02  | 6,53E-01 | 8,49E-01 |
| <i>GARNL3</i>          | 1,02  | 6,53E-01 | 8,49E-01 |
| <i>NPNT</i>            | 1,05  | 6,53E-01 | 8,49E-01 |
| <i>A_24_P41979</i>     | -1,02 | 6,53E-01 | 8,49E-01 |
| <i>ARHGEF7</i>         | 1,02  | 6,53E-01 | 8,49E-01 |
| <i>AHSG</i>            | 1,02  | 6,54E-01 | 8,49E-01 |
| <i>GTF3C4</i>          | -1,02 | 6,54E-01 | 8,49E-01 |
| <i>THC2434943</i>      | -1,01 | 6,54E-01 | 8,49E-01 |
| <i>LOC651900</i>       | 1,02  | 6,54E-01 | 8,49E-01 |
| <i>A_24_P281264</i>    | 1,02  | 6,54E-01 | 8,49E-01 |
| <i>AF086045</i>        | -1,02 | 6,54E-01 | 8,49E-01 |
| <i>LY96</i>            | -1,03 | 6,54E-01 | 8,49E-01 |
| <i>AF289590</i>        | -1,03 | 6,54E-01 | 8,49E-01 |
| <i>MGC26744</i>        | 1,01  | 6,54E-01 | 8,49E-01 |
| <i>HDAC5</i>           | 1,03  | 6,54E-01 | 8,49E-01 |
| <i>AW612629</i>        | 1,02  | 6,54E-01 | 8,49E-01 |

|                        |       |          |          |
|------------------------|-------|----------|----------|
| <i>MSTO1</i>           | -1,02 | 6,54E-01 | 8,49E-01 |
| <i>CHP</i>             | 1,02  | 6,54E-01 | 8,49E-01 |
| <i>LOC402689</i>       | -1,03 | 6,54E-01 | 8,49E-01 |
| <i>AK021842</i>        | 1,01  | 6,54E-01 | 8,49E-01 |
| <i>DB329052</i>        | 1,02  | 6,54E-01 | 8,49E-01 |
| <i>A_24_P941540</i>    | 1,04  | 6,54E-01 | 8,49E-01 |
| <i>BCL2L11</i>         | -1,02 | 6,55E-01 | 8,49E-01 |
| <i>THC2280145</i>      | 1,02  | 6,55E-01 | 8,49E-01 |
| <i>HLA-DRB4</i>        | -1,05 | 6,55E-01 | 8,49E-01 |
| <i>A_24_P913629</i>    | -1,03 | 6,55E-01 | 8,50E-01 |
| <i>CR608961</i>        | -1,02 | 6,55E-01 | 8,50E-01 |
| <i>LAMB2</i>           | -1,02 | 6,55E-01 | 8,50E-01 |
| <i>RAP2B</i>           | -1,02 | 6,55E-01 | 8,50E-01 |
| <i>T25391</i>          | -1,01 | 6,55E-01 | 8,50E-01 |
| <i>ALX4</i>            | 1,02  | 6,55E-01 | 8,50E-01 |
| <i>A_32_P221748</i>    | 1,02  | 6,55E-01 | 8,50E-01 |
| <i>MPN2</i>            | 1,02  | 6,55E-01 | 8,50E-01 |
| <i>ATP10B</i>          | 1,03  | 6,55E-01 | 8,50E-01 |
| <i>ENST00000380787</i> | -1,02 | 6,55E-01 | 8,50E-01 |
| <i>THC2407348</i>      | 1,02  | 6,55E-01 | 8,50E-01 |
| <i>PITPNM2</i>         | 1,02  | 6,55E-01 | 8,50E-01 |
| <i>AI263220</i>        | 1,02  | 6,55E-01 | 8,50E-01 |
| <i>AK022936</i>        | -1,03 | 6,55E-01 | 8,50E-01 |
| <i>ZAK</i>             | -1,04 | 6,55E-01 | 8,50E-01 |
| <i>AF118072</i>        | 1,02  | 6,56E-01 | 8,50E-01 |
| <i>VCL</i>             | 1,04  | 6,56E-01 | 8,50E-01 |
| <i>PTK6</i>            | -1,05 | 6,56E-01 | 8,50E-01 |
| <i>A_24_P340891</i>    | -1,02 | 6,56E-01 | 8,50E-01 |
| <i>THC2418648</i>      | -1,02 | 6,56E-01 | 8,50E-01 |
| <i>ETG05_36762</i>     | 1,01  | 6,56E-01 | 8,50E-01 |
| <i>A_24_P101211</i>    | -1,06 | 6,56E-01 | 8,50E-01 |
| <i>KIAA0152</i>        | -1,03 | 6,56E-01 | 8,50E-01 |
| <i>BF335933</i>        | -1,02 | 6,56E-01 | 8,51E-01 |
| <i>KLC2</i>            | 1,01  | 6,56E-01 | 8,51E-01 |
| <i>OR7E5P</i>          | -1,02 | 6,56E-01 | 8,51E-01 |
| <i>ENST00000246019</i> | -1,02 | 6,56E-01 | 8,51E-01 |
| <i>A_24_P835921</i>    | -1,02 | 6,56E-01 | 8,51E-01 |
| <i>THC2433786</i>      | 1,03  | 6,56E-01 | 8,51E-01 |
| <i>AI697848</i>        | -1,02 | 6,57E-01 | 8,51E-01 |
| <i>C20orf85</i>        | -1,01 | 6,57E-01 | 8,51E-01 |
| <i>PAK6</i>            | 1,04  | 6,57E-01 | 8,51E-01 |
| <i>KRT2B</i>           | -1,05 | 6,57E-01 | 8,51E-01 |
| <i>SCD</i>             | -1,04 | 6,57E-01 | 8,51E-01 |
| <i>AW276332</i>        | -1,03 | 6,57E-01 | 8,51E-01 |

|                        |       |          |          |
|------------------------|-------|----------|----------|
| <i>BX109843</i>        | -1,02 | 6,57E-01 | 8,51E-01 |
| <i>ENST00000355278</i> | -1,02 | 6,57E-01 | 8,51E-01 |
| <i>A_32_P184039</i>    | -1,04 | 6,57E-01 | 8,51E-01 |
| <i>DEK</i>             | -1,03 | 6,57E-01 | 8,51E-01 |
| <i>MGC34796</i>        | -1,02 | 6,57E-01 | 8,51E-01 |
| <i>AL049387</i>        | -1,02 | 6,57E-01 | 8,51E-01 |
| <i>AA234275</i>        | -1,02 | 6,57E-01 | 8,51E-01 |
| <i>THC2383410</i>      | -1,02 | 6,57E-01 | 8,51E-01 |
| <i>PFKM</i>            | -1,02 | 6,57E-01 | 8,51E-01 |
| <i>BRD3</i>            | -1,02 | 6,57E-01 | 8,51E-01 |
| <i>A_24_P24230</i>     | -1,02 | 6,57E-01 | 8,51E-01 |
| <i>A_32_P149404</i>    | -1,02 | 6,57E-01 | 8,51E-01 |
| <i>DKFZp781M2440</i>   | -1,01 | 6,57E-01 | 8,51E-01 |
| <i>TERF2IP</i>         | -1,01 | 6,57E-01 | 8,51E-01 |
| <i>LOC644074</i>       | 1,01  | 6,57E-01 | 8,51E-01 |
| <i>ENST00000254271</i> | 1,02  | 6,57E-01 | 8,51E-01 |
| <i>THC2391898</i>      | 1,02  | 6,57E-01 | 8,51E-01 |
| <i>THC2444917</i>      | 1,02  | 6,57E-01 | 8,51E-01 |
| <i>AW939027</i>        | 1,02  | 6,57E-01 | 8,51E-01 |
| <i>RUTBC1</i>          | 1,02  | 6,57E-01 | 8,51E-01 |
| <i>JOSD2</i>           | 1,02  | 6,57E-01 | 8,51E-01 |
| <i>MAP3K4</i>          | 1,02  | 6,57E-01 | 8,51E-01 |
| <i>TCN2</i>            | 1,03  | 6,57E-01 | 8,51E-01 |
| <i>A_24_P549927</i>    | 1,03  | 6,57E-01 | 8,51E-01 |
| <i>A_32_P96124</i>     | -1,01 | 6,58E-01 | 8,51E-01 |
| <i>C6orf129</i>        | 1,04  | 6,58E-01 | 8,51E-01 |
| <i>RBM11</i>           | -1,03 | 6,58E-01 | 8,51E-01 |
| <i>THC2355280</i>      | -1,02 | 6,58E-01 | 8,51E-01 |
| <i>C10orf32</i>        | -1,02 | 6,58E-01 | 8,51E-01 |
| <i>FGF21</i>           | -1,02 | 6,58E-01 | 8,51E-01 |
| <i>CB131079</i>        | 1,02  | 6,58E-01 | 8,51E-01 |
| <i>BE048129</i>        | 1,02  | 6,58E-01 | 8,51E-01 |
| <i>THC2412305</i>      | -1,02 | 6,58E-01 | 8,51E-01 |
| <i>REG3A</i>           | -1,02 | 6,58E-01 | 8,51E-01 |
| <i>STAM</i>            | 1,02  | 6,58E-01 | 8,51E-01 |
| <i>FBXO9</i>           | 1,01  | 6,58E-01 | 8,52E-01 |
| <i>A_24_P818136</i>    | 1,02  | 6,58E-01 | 8,52E-01 |
| <i>BC039411</i>        | 1,09  | 6,58E-01 | 8,52E-01 |
| <i>A_32_P184304</i>    | -1,02 | 6,58E-01 | 8,52E-01 |
| <i>SLC8A1</i>          | 1,07  | 6,58E-01 | 8,52E-01 |
| <i>A_32_P137149</i>    | -1,04 | 6,59E-01 | 8,52E-01 |
| <i>MSTP9</i>           | -1,04 | 6,59E-01 | 8,52E-01 |
| <i>7A5</i>             | -1,02 | 6,59E-01 | 8,52E-01 |
| <i>SCAMP1</i>          | 1,02  | 6,59E-01 | 8,52E-01 |

|                        |       |          |          |
|------------------------|-------|----------|----------|
| <i>LOC440345</i>       | 1,02  | 6,59E-01 | 8,52E-01 |
| <i>GNRH2</i>           | 1,02  | 6,59E-01 | 8,52E-01 |
| <i>M14087</i>          | 1,05  | 6,59E-01 | 8,52E-01 |
| <i>SAMD7</i>           | -1,02 | 6,59E-01 | 8,52E-01 |
| <i>CR596214</i>        | -1,02 | 6,59E-01 | 8,52E-01 |
| <i>PTCRA</i>           | 1,01  | 6,59E-01 | 8,52E-01 |
| <i>SP2</i>             | 1,01  | 6,59E-01 | 8,52E-01 |
| <i>OPHN1</i>           | 1,02  | 6,59E-01 | 8,52E-01 |
| <i>S100A8</i>          | -1,18 | 6,59E-01 | 8,52E-01 |
| <i>A_32_P208713</i>    | -1,03 | 6,59E-01 | 8,52E-01 |
| <i>KIAA0513</i>        | -1,03 | 6,59E-01 | 8,52E-01 |
| <i>BC031228</i>        | -1,01 | 6,59E-01 | 8,52E-01 |
| <i>THC2319699</i>      | -1,01 | 6,59E-01 | 8,52E-01 |
| <i>SLC9A2</i>          | 1,02  | 6,59E-01 | 8,52E-01 |
| <i>A_23_P158380</i>    | 1,02  | 6,59E-01 | 8,52E-01 |
| <i>AL833114</i>        | 1,04  | 6,59E-01 | 8,52E-01 |
| <i>A_24_P941266</i>    | -1,02 | 6,59E-01 | 8,52E-01 |
| <i>PIP5K1A</i>         | 1,02  | 6,59E-01 | 8,52E-01 |
| <i>A_24_P281504</i>    | 1,02  | 6,59E-01 | 8,52E-01 |
| <i>APOC1</i>           | -1,07 | 6,59E-01 | 8,52E-01 |
| <i>AI084055</i>        | -1,05 | 6,59E-01 | 8,52E-01 |
| <i>MRC2</i>            | -1,04 | 6,60E-01 | 8,52E-01 |
| <i>VAMP1</i>           | -1,03 | 6,60E-01 | 8,52E-01 |
| <i>ENST00000343567</i> | -1,02 | 6,59E-01 | 8,52E-01 |
| <i>MARVELD1</i>        | -1,02 | 6,60E-01 | 8,52E-01 |
| <i>H70813</i>          | -1,02 | 6,60E-01 | 8,52E-01 |
| <i>BF735554</i>        | -1,02 | 6,59E-01 | 8,52E-01 |
| <i>ARIH2</i>           | -1,01 | 6,60E-01 | 8,52E-01 |
| <i>RNF121</i>          | 1,02  | 6,60E-01 | 8,52E-01 |
| <i>FAM55A</i>          | 1,02  | 6,60E-01 | 8,52E-01 |
| <i>KLHDC5</i>          | 1,03  | 6,60E-01 | 8,52E-01 |
| <i>A_24_P196024</i>    | 1,05  | 6,60E-01 | 8,52E-01 |
| <i>PF4</i>             | 1,09  | 6,60E-01 | 8,52E-01 |
| <i>LOC440905</i>       | 1,02  | 6,60E-01 | 8,52E-01 |
| <i>C3orf22</i>         | 1,01  | 6,60E-01 | 8,52E-01 |
| <i>AP3S2</i>           | -1,02 | 6,60E-01 | 8,53E-01 |
| <i>AK096194</i>        | 1,02  | 6,60E-01 | 8,53E-01 |
| <i>THC2344809</i>      | -1,02 | 6,60E-01 | 8,53E-01 |
| <i>AF199612</i>        | -1,02 | 6,60E-01 | 8,53E-01 |
| <i>ZNF451</i>          | -1,01 | 6,60E-01 | 8,53E-01 |
| <i>CA9</i>             | 1,02  | 6,60E-01 | 8,53E-01 |
| <i>CA418661</i>        | 1,03  | 6,60E-01 | 8,53E-01 |
| <i>THC2438512</i>      | 1,01  | 6,60E-01 | 8,53E-01 |
| <i>AK091508</i>        | -1,02 | 6,60E-01 | 8,53E-01 |

|                        |       |          |          |
|------------------------|-------|----------|----------|
| <i>C10orf76</i>        | -1,01 | 6,60E-01 | 8,53E-01 |
| <i>ABO46850</i>        | -1,04 | 6,61E-01 | 8,53E-01 |
| <i>NDUFB10</i>         | 1,02  | 6,61E-01 | 8,53E-01 |
| <i>LYST</i>            | -1,03 | 6,61E-01 | 8,53E-01 |
| <i>SLC39A6</i>         | -1,02 | 6,61E-01 | 8,53E-01 |
| <i>NEF3</i>            | 1,10  | 6,61E-01 | 8,53E-01 |
| <i>AF052152</i>        | -1,03 | 6,61E-01 | 8,53E-01 |
| <i>ENST00000306733</i> | -1,02 | 6,61E-01 | 8,53E-01 |
| <i>RPL22</i>           | -1,02 | 6,61E-01 | 8,53E-01 |
| <i>ATG5</i>            | -1,02 | 6,61E-01 | 8,53E-01 |
| <i>ENST00000331754</i> | 1,07  | 6,61E-01 | 8,53E-01 |
| <i>DKFZp686D0972</i>   | 1,11  | 6,61E-01 | 8,53E-01 |
| <i>AF119882</i>        | -1,02 | 6,61E-01 | 8,53E-01 |
| <i>FLJ20850</i>        | -1,01 | 6,61E-01 | 8,53E-01 |
| <i>COMMD1</i>          | 1,02  | 6,61E-01 | 8,53E-01 |
| <i>DGUOK</i>           | -1,02 | 6,61E-01 | 8,53E-01 |
| <i>SLC27A3</i>         | 1,02  | 6,61E-01 | 8,53E-01 |
| <i>CD84</i>            | -1,02 | 6,61E-01 | 8,53E-01 |
| <i>LSM14B</i>          | 1,02  | 6,61E-01 | 8,53E-01 |
| <i>HS322B1A</i>        | -1,01 | 6,61E-01 | 8,53E-01 |
| <i>FAM58A</i>          | -1,01 | 6,61E-01 | 8,53E-01 |
| <i>A_24_P127442</i>    | -1,04 | 6,61E-01 | 8,53E-01 |
| <i>ATXN7L3</i>         | -1,01 | 6,61E-01 | 8,53E-01 |
| <i>SLC39A12</i>        | -1,01 | 6,61E-01 | 8,53E-01 |
| <i>CAMK2D</i>          | 1,02  | 6,61E-01 | 8,53E-01 |
| <i>A_32_P134556</i>    | -1,03 | 6,61E-01 | 8,53E-01 |
| <i>RBM6</i>            | -1,02 | 6,62E-01 | 8,53E-01 |
| <i>NUDT15</i>          | -1,02 | 6,62E-01 | 8,53E-01 |
| <i>ETFB</i>            | -1,02 | 6,62E-01 | 8,53E-01 |
| <i>ENST00000367242</i> | 1,02  | 6,62E-01 | 8,53E-01 |
| <i>SLC7A1</i>          | 1,02  | 6,62E-01 | 8,53E-01 |
| <i>ZPBP</i>            | 1,04  | 6,62E-01 | 8,53E-01 |
| <i>A_24_P928815</i>    | 1,02  | 6,62E-01 | 8,53E-01 |
| <i>STXBP5</i>          | 1,02  | 6,62E-01 | 8,53E-01 |
| <i>PRDM12</i>          | -1,02 | 6,62E-01 | 8,53E-01 |
| <i>CR618409</i>        | -1,03 | 6,62E-01 | 8,53E-01 |
| <i>BX106493</i>        | -1,06 | 6,62E-01 | 8,53E-01 |
| <i>BC032755</i>        | -1,02 | 6,62E-01 | 8,53E-01 |
| <i>HMGCS2</i>          | -1,02 | 6,62E-01 | 8,53E-01 |
| <i>A_24_P341408</i>    | 1,02  | 6,62E-01 | 8,53E-01 |
| <i>THC2374304</i>      | -1,02 | 6,62E-01 | 8,54E-01 |
| <i>OR4K1</i>           | 1,02  | 6,62E-01 | 8,54E-01 |
| <i>C21orf125</i>       | -1,02 | 6,62E-01 | 8,54E-01 |
| <i>FAM5C</i>           | 1,02  | 6,62E-01 | 8,54E-01 |

|                        |       |          |          |
|------------------------|-------|----------|----------|
| <i>PLA2G7</i>          | -1,05 | 6,63E-01 | 8,54E-01 |
| <i>DGAT2</i>           | -1,03 | 6,63E-01 | 8,54E-01 |
| <i>SRC</i>             | -1,02 | 6,63E-01 | 8,54E-01 |
| <i>KIAA1147</i>        | -1,02 | 6,63E-01 | 8,54E-01 |
| <i>A_24_P926006</i>    | -1,02 | 6,63E-01 | 8,54E-01 |
| <i>AF229166</i>        | -1,01 | 6,63E-01 | 8,54E-01 |
| <i>PSMF1</i>           | -1,01 | 6,63E-01 | 8,54E-01 |
| <i>CEP170</i>          | 1,01  | 6,63E-01 | 8,54E-01 |
| <i>TEAD2</i>           | 1,01  | 6,63E-01 | 8,54E-01 |
| <i>THC2378499</i>      | 1,02  | 6,63E-01 | 8,54E-01 |
| <i>A_32_P198807</i>    | 1,02  | 6,63E-01 | 8,54E-01 |
| <i>THC2262839</i>      | 1,02  | 6,63E-01 | 8,54E-01 |
| <i>CALML5</i>          | 1,12  | 6,63E-01 | 8,54E-01 |
| <i>A_24_P921213</i>    | 1,02  | 6,63E-01 | 8,54E-01 |
| <i>GPR84</i>           | -1,02 | 6,63E-01 | 8,54E-01 |
| <i>TCF20</i>           | -1,02 | 6,63E-01 | 8,54E-01 |
| <i>HDAC10</i>          | -1,03 | 6,63E-01 | 8,54E-01 |
| <i>KRT83</i>           | 1,02  | 6,63E-01 | 8,54E-01 |
| <i>Z36836</i>          | -1,02 | 6,63E-01 | 8,54E-01 |
| <i>VTN</i>             | -1,02 | 6,63E-01 | 8,54E-01 |
| <i>LOC92196</i>        | 1,22  | 6,63E-01 | 8,54E-01 |
| <i>THC2412859</i>      | -1,03 | 6,63E-01 | 8,54E-01 |
| <i>KIAA1107</i>        | -1,03 | 6,63E-01 | 8,54E-01 |
| <i>TYK2</i>            | -1,01 | 6,63E-01 | 8,54E-01 |
| <i>FBLIM1</i>          | 1,04  | 6,64E-01 | 8,54E-01 |
| <i>KCNJ11</i>          | 1,02  | 6,64E-01 | 8,54E-01 |
| <i>SLC38A1</i>         | 1,04  | 6,64E-01 | 8,54E-01 |
| <i>PSD4</i>            | -1,03 | 6,64E-01 | 8,54E-01 |
| <i>DCLRE1B</i>         | -1,02 | 6,64E-01 | 8,54E-01 |
| <i>CHD8</i>            | -1,01 | 6,64E-01 | 8,54E-01 |
| <i>EIF3S8</i>          | 1,02  | 6,64E-01 | 8,54E-01 |
| <i>PTPN3</i>           | 1,03  | 6,64E-01 | 8,54E-01 |
| <i>IL21R</i>           | -1,03 | 6,64E-01 | 8,55E-01 |
| <i>A_23_P124377</i>    | 1,02  | 6,64E-01 | 8,55E-01 |
| <i>LOC200169</i>       | -1,03 | 6,64E-01 | 8,55E-01 |
| <i>CB305794</i>        | -1,02 | 6,64E-01 | 8,55E-01 |
| <i>PREPL</i>           | -1,02 | 6,64E-01 | 8,55E-01 |
| <i>GSH2</i>            | -1,02 | 6,64E-01 | 8,55E-01 |
| <i>LOC341346</i>       | 1,02  | 6,64E-01 | 8,55E-01 |
| <i>AF277188</i>        | 1,02  | 6,64E-01 | 8,55E-01 |
| <i>ELP3</i>            | 1,02  | 6,65E-01 | 8,55E-01 |
| <i>CR609715</i>        | -1,03 | 6,65E-01 | 8,55E-01 |
| <i>THC2346243</i>      | -1,06 | 6,65E-01 | 8,55E-01 |
| <i>ENST00000357267</i> | -1,02 | 6,65E-01 | 8,55E-01 |

|                        |       |          |          |
|------------------------|-------|----------|----------|
| <i>GALP</i>            | -1,02 | 6,65E-01 | 8,55E-01 |
| <i>UCN3</i>            | -1,01 | 6,65E-01 | 8,55E-01 |
| <i>GPKOW</i>           | 1,01  | 6,65E-01 | 8,55E-01 |
| <i>AP2A1</i>           | 1,01  | 6,65E-01 | 8,55E-01 |
| <i>DGKA</i>            | 1,02  | 6,65E-01 | 8,55E-01 |
| <i>A_23_P20578</i>     | 1,02  | 6,65E-01 | 8,55E-01 |
| <i>ABO25028</i>        | 1,02  | 6,65E-01 | 8,55E-01 |
| <i>PPP1R16B</i>        | 1,02  | 6,65E-01 | 8,55E-01 |
| <i>LOC374890</i>       | 1,04  | 6,65E-01 | 8,55E-01 |
| <i>UAP1L1</i>          | -1,02 | 6,65E-01 | 8,55E-01 |
| <i>EGFL9</i>           | 1,02  | 6,65E-01 | 8,55E-01 |
| <i>CD633934</i>        | 1,02  | 6,65E-01 | 8,55E-01 |
| <i>THC2344060</i>      | 1,02  | 6,65E-01 | 8,55E-01 |
| <i>PDE10A</i>          | 1,04  | 6,65E-01 | 8,55E-01 |
| <i>ADH7</i>            | -1,03 | 6,66E-01 | 8,55E-01 |
| <i>ENST00000355343</i> | -1,02 | 6,65E-01 | 8,55E-01 |
| <i>CR1</i>             | -1,01 | 6,65E-01 | 8,55E-01 |
| <i>A_24_P238716</i>    | -1,02 | 6,66E-01 | 8,56E-01 |
| <i>TFPT</i>            | 1,01  | 6,66E-01 | 8,56E-01 |
| <i>A_24_P704878</i>    | 1,02  | 6,66E-01 | 8,56E-01 |
| <i>BX114970</i>        | -1,01 | 6,66E-01 | 8,56E-01 |
| <i>CR608907</i>        | -1,02 | 6,66E-01 | 8,56E-01 |
| <i>ENST00000300590</i> | 1,02  | 6,66E-01 | 8,56E-01 |
| <i>A_32_P41594</i>     | 1,02  | 6,66E-01 | 8,56E-01 |
| <i>AVPR2</i>           | -1,03 | 6,66E-01 | 8,56E-01 |
| <i>FLJ23049</i>        | -1,02 | 6,66E-01 | 8,56E-01 |
| <i>A_24_P912827</i>    | 1,02  | 6,66E-01 | 8,56E-01 |
| <i>THC2280006</i>      | 1,02  | 6,66E-01 | 8,56E-01 |
| <i>TXNDC13</i>         | 1,02  | 6,66E-01 | 8,56E-01 |
| <i>THC2438999</i>      | -1,03 | 6,66E-01 | 8,56E-01 |
| <i>RNF6</i>            | -1,03 | 6,66E-01 | 8,56E-01 |
| <i>USP28</i>           | -1,02 | 6,66E-01 | 8,56E-01 |
| <i>BM045853</i>        | 1,03  | 6,66E-01 | 8,56E-01 |
| <i>SLCO1B1</i>         | 1,02  | 6,67E-01 | 8,56E-01 |
| <i>MGC2752</i>         | 1,02  | 6,67E-01 | 8,56E-01 |
| <i>LRRTM4</i>          | -1,03 | 6,67E-01 | 8,56E-01 |
| <i>ELF5</i>            | 1,01  | 6,67E-01 | 8,56E-01 |
| <i>A_24_P16071</i>     | 1,03  | 6,67E-01 | 8,57E-01 |
| <i>ENST00000382184</i> | 1,02  | 6,67E-01 | 8,57E-01 |
| <i>CHRNA2</i>          | 1,02  | 6,67E-01 | 8,57E-01 |
| <i>FBN1</i>            | 1,06  | 6,67E-01 | 8,57E-01 |
| <i>FLJ90013</i>        | 1,01  | 6,67E-01 | 8,57E-01 |
| <i>SIGLEC5</i>         | -1,02 | 6,67E-01 | 8,57E-01 |
| <i>ENST00000369705</i> | -1,03 | 6,67E-01 | 8,57E-01 |

|                        |       |          |          |
|------------------------|-------|----------|----------|
| <i>CR610169</i>        | 1,02  | 6,67E-01 | 8,57E-01 |
| <i>A_24_P213375</i>    | -1,05 | 6,67E-01 | 8,57E-01 |
| <i>THC2273741</i>      | -1,02 | 6,67E-01 | 8,57E-01 |
| <i>AI911586</i>        | 1,02  | 6,67E-01 | 8,57E-01 |
| <i>A_24_P41781</i>     | 1,03  | 6,67E-01 | 8,57E-01 |
| <i>VGLL1</i>           | -1,02 | 6,68E-01 | 8,57E-01 |
| <i>A_24_P932919</i>    | -1,02 | 6,68E-01 | 8,57E-01 |
| <i>AI948877</i>        | -1,01 | 6,68E-01 | 8,57E-01 |
| <i>LMOD3</i>           | -1,01 | 6,68E-01 | 8,57E-01 |
| <i>C12orf4</i>         | 1,01  | 6,68E-01 | 8,57E-01 |
| <i>PLEKHA8</i>         | 1,02  | 6,68E-01 | 8,57E-01 |
| <i>GHSR</i>            | 1,02  | 6,68E-01 | 8,57E-01 |
| <i>AB019568</i>        | 1,02  | 6,68E-01 | 8,57E-01 |
| <i>THC2322212</i>      | 1,02  | 6,68E-01 | 8,57E-01 |
| <i>DB304731</i>        | 1,02  | 6,68E-01 | 8,57E-01 |
| <i>AK022346</i>        | 1,02  | 6,68E-01 | 8,57E-01 |
| <i>THC2343880</i>      | 1,03  | 6,68E-01 | 8,57E-01 |
| <i>A_32_P14737</i>     | 1,05  | 6,68E-01 | 8,57E-01 |
| <i>HSPB3</i>           | 1,10  | 6,68E-01 | 8,57E-01 |
| <i>LOC387882</i>       | -1,06 | 6,68E-01 | 8,57E-01 |
| <i>RRM1</i>            | 1,02  | 6,68E-01 | 8,57E-01 |
| <i>ENST00000273064</i> | 1,02  | 6,68E-01 | 8,57E-01 |
| <i>POLR2J2</i>         | 1,01  | 6,68E-01 | 8,57E-01 |
| <i>HTN1</i>            | 1,02  | 6,68E-01 | 8,57E-01 |
| <i>RIC8A</i>           | -1,02 | 6,68E-01 | 8,57E-01 |
| <i>UPK1B</i>           | 1,04  | 6,68E-01 | 8,57E-01 |
| <i>LOC152663</i>       | -1,02 | 6,68E-01 | 8,57E-01 |
| <i>THC2282618</i>      | -1,03 | 6,68E-01 | 8,57E-01 |
| <i>BRRN1</i>           | -1,02 | 6,68E-01 | 8,57E-01 |
| <i>A_32_P46700</i>     | 1,02  | 6,69E-01 | 8,57E-01 |
| <i>WISP3</i>           | -1,02 | 6,69E-01 | 8,57E-01 |
| <i>AA693695</i>        | -1,02 | 6,69E-01 | 8,57E-01 |
| <i>AI815088</i>        | -1,01 | 6,69E-01 | 8,57E-01 |
| <i>TXNDC12</i>         | 1,02  | 6,69E-01 | 8,57E-01 |
| <i>CR603195</i>        | 1,02  | 6,69E-01 | 8,57E-01 |
| <i>A_24_P839530</i>    | 1,08  | 6,69E-01 | 8,57E-01 |
| <i>THC2441521</i>      | 1,02  | 6,69E-01 | 8,58E-01 |
| <i>KRTAP7-1</i>        | 1,02  | 6,69E-01 | 8,58E-01 |
| <i>ENST00000353442</i> | -1,02 | 6,69E-01 | 8,58E-01 |
| <i>THC2352042</i>      | -1,03 | 6,69E-01 | 8,58E-01 |
| <i>A_23_P255637</i>    | 1,02  | 6,69E-01 | 8,58E-01 |
| <i>STXBP6</i>          | -1,03 | 6,69E-01 | 8,58E-01 |
| <i>KIAA0922</i>        | 1,02  | 6,69E-01 | 8,58E-01 |
| <i>ENST00000299308</i> | 1,02  | 6,69E-01 | 8,58E-01 |



|                     |       |          |          |
|---------------------|-------|----------|----------|
| <i>THC2406285</i>   | 1,03  | 6,69E-01 | 8,58E-01 |
| <i>LOC653071</i>    | -1,05 | 6,69E-01 | 8,58E-01 |
| <i>MGC24975</i>     | -1,02 | 6,69E-01 | 8,58E-01 |
| <i>THC2240331</i>   | -1,02 | 6,69E-01 | 8,58E-01 |
| <i>TFAP2A</i>       | 1,02  | 6,69E-01 | 8,58E-01 |
| <i>GRM1</i>         | -1,02 | 6,70E-01 | 8,58E-01 |
| <i>CSTF2</i>        | 1,02  | 6,70E-01 | 8,58E-01 |
| <i>AF116652</i>     | -1,02 | 6,70E-01 | 8,58E-01 |
| <i>KCNIP1</i>       | -1,01 | 6,70E-01 | 8,58E-01 |
| <i>GPR111</i>       | 1,02  | 6,70E-01 | 8,58E-01 |
| <i>THC2279548</i>   | 1,02  | 6,70E-01 | 8,58E-01 |
| <i>KSR2</i>         | 1,02  | 6,70E-01 | 8,58E-01 |
| <i>HIST1H4E</i>     | 1,04  | 6,70E-01 | 8,58E-01 |
| <i>C8orf17</i>      | -1,01 | 6,70E-01 | 8,58E-01 |
| <i>TOMM22</i>       | 1,01  | 6,70E-01 | 8,58E-01 |
| <i>AGXT2</i>        | 1,01  | 6,70E-01 | 8,58E-01 |
| <i>A_24_P332911</i> | 1,02  | 6,70E-01 | 8,58E-01 |
| <i>CSTL1</i>        | 1,02  | 6,70E-01 | 8,58E-01 |
| <i>DUOX2</i>        | -1,04 | 6,70E-01 | 8,58E-01 |
| <i>XRCC3</i>        | -1,02 | 6,70E-01 | 8,58E-01 |
| <i>COX4NB</i>       | -1,02 | 6,70E-01 | 8,58E-01 |
| <i>TMEM19</i>       | -1,01 | 6,70E-01 | 8,58E-01 |
| <i>A_24_P912626</i> | 1,02  | 6,70E-01 | 8,58E-01 |
| <i>BC034566</i>     | 1,02  | 6,70E-01 | 8,58E-01 |
| <i>A_24_P686243</i> | 1,04  | 6,70E-01 | 8,58E-01 |
| <i>ADH1C</i>        | 1,10  | 6,70E-01 | 8,58E-01 |
| <i>A_24_P914102</i> | -1,03 | 6,70E-01 | 8,58E-01 |
| <i>AF116678</i>     | -1,02 | 6,70E-01 | 8,58E-01 |
| <i>THC2313103</i>   | -1,02 | 6,70E-01 | 8,58E-01 |
| <i>TRGV5</i>        | -1,02 | 6,70E-01 | 8,58E-01 |
| <i>AI755057</i>     | -1,02 | 6,70E-01 | 8,58E-01 |
| <i>AI277752</i>     | 1,01  | 6,70E-01 | 8,58E-01 |
| <i>RP4-621O15.2</i> | 1,02  | 6,70E-01 | 8,58E-01 |
| <i>A_24_P493100</i> | 1,02  | 6,70E-01 | 8,58E-01 |
| <i>IRX3</i>         | 1,05  | 6,70E-01 | 8,58E-01 |
| <i>ITGB1BP2</i>     | 1,08  | 6,70E-01 | 8,58E-01 |
| <i>ADH1A</i>        | 1,09  | 6,70E-01 | 8,58E-01 |
| <i>A_24_P931653</i> | 1,02  | 6,71E-01 | 8,58E-01 |
| <i>THC2407608</i>   | 1,02  | 6,71E-01 | 8,58E-01 |
| <i>HCN1</i>         | 1,02  | 6,71E-01 | 8,58E-01 |
| <i>OAS1</i>         | -1,03 | 6,71E-01 | 8,58E-01 |
| <i>GATA6</i>        | 1,04  | 6,71E-01 | 8,58E-01 |
| <i>A_24_P58647</i>  | 1,02  | 6,71E-01 | 8,58E-01 |
| <i>CYorf15A</i>     | 1,01  | 6,71E-01 | 8,58E-01 |

|                        |       |          |          |
|------------------------|-------|----------|----------|
| <i>CAPS</i>            | -1,02 | 6,71E-01 | 8,58E-01 |
| <i>KRT6B</i>           | 1,25  | 6,71E-01 | 8,58E-01 |
| <i>LIMS2</i>           | -1,03 | 6,71E-01 | 8,59E-01 |
| <i>BF527031</i>        | -1,02 | 6,71E-01 | 8,59E-01 |
| <i>FGR</i>             | 1,03  | 6,71E-01 | 8,59E-01 |
| <i>FLJ39155</i>        | 1,03  | 6,71E-01 | 8,59E-01 |
| <i>ENST00000341108</i> | -1,02 | 6,71E-01 | 8,59E-01 |
| <i>EFNA2</i>           | 1,02  | 6,71E-01 | 8,59E-01 |
| <i>HTR5A</i>           | -1,01 | 6,71E-01 | 8,59E-01 |
| <i>KBTBD4</i>          | -1,02 | 6,71E-01 | 8,59E-01 |
| <i>MC1R</i>            | -1,03 | 6,72E-01 | 8,59E-01 |
| <i>CRYBB3</i>          | 1,01  | 6,72E-01 | 8,59E-01 |
| <i>A_24_P144183</i>    | -1,02 | 6,72E-01 | 8,59E-01 |
| <i>A_23_P68138</i>     | -1,02 | 6,72E-01 | 8,59E-01 |
| <i>NSUN2</i>           | -1,01 | 6,72E-01 | 8,59E-01 |
| <i>BE143376</i>        | -1,01 | 6,72E-01 | 8,59E-01 |
| <i>MS4A12</i>          | -1,02 | 6,72E-01 | 8,59E-01 |
| <i>ENST00000368766</i> | 1,02  | 6,72E-01 | 8,59E-01 |
| <i>THC2396617</i>      | -1,02 | 6,72E-01 | 8,59E-01 |
| <i>COMMD2</i>          | 1,01  | 6,72E-01 | 8,59E-01 |
| <i>AB014766</i>        | 1,04  | 6,72E-01 | 8,59E-01 |
| <i>C1orf144</i>        | 1,02  | 6,72E-01 | 8,59E-01 |
| <i>AK001097</i>        | 1,02  | 6,72E-01 | 8,59E-01 |
| <i>RUSC2</i>           | 1,01  | 6,72E-01 | 8,59E-01 |
| <i>TCF12</i>           | 1,03  | 6,72E-01 | 8,59E-01 |
| <i>A_24_P925901</i>    | 1,02  | 6,72E-01 | 8,59E-01 |
| <i>A_24_P933278</i>    | -1,02 | 6,73E-01 | 8,60E-01 |
| <i>C6orf218</i>        | 1,02  | 6,73E-01 | 8,60E-01 |
| <i>A_24_P76362</i>     | -1,05 | 6,73E-01 | 8,60E-01 |
| <i>KIF25</i>           | -1,02 | 6,73E-01 | 8,60E-01 |
| <i>AK021474</i>        | -1,02 | 6,73E-01 | 8,60E-01 |
| <i>PLXDC2</i>          | 1,03  | 6,73E-01 | 8,60E-01 |
| <i>A_24_P930829</i>    | -1,02 | 6,73E-01 | 8,60E-01 |
| <i>HSF1</i>            | -1,02 | 6,73E-01 | 8,60E-01 |
| <i>SLC7A10</i>         | -1,02 | 6,73E-01 | 8,60E-01 |
| <i>A_24_P930253</i>    | -1,02 | 6,73E-01 | 8,60E-01 |
| <i>WHSC1L1</i>         | -1,01 | 6,73E-01 | 8,60E-01 |
| <i>A_24_P689479</i>    | 1,02  | 6,73E-01 | 8,60E-01 |
| <i>THC2268736</i>      | 1,02  | 6,73E-01 | 8,60E-01 |
| <i>ENST00000321377</i> | 1,02  | 6,73E-01 | 8,60E-01 |
| <i>NUDT19</i>          | 1,02  | 6,73E-01 | 8,60E-01 |
| <i>THC2314214</i>      | 1,02  | 6,73E-01 | 8,60E-01 |
| <i>A_24_P204204</i>    | 1,04  | 6,73E-01 | 8,60E-01 |
| <i>THC2397883</i>      | 1,06  | 6,73E-01 | 8,60E-01 |

|                        |       |          |          |
|------------------------|-------|----------|----------|
| <i>BYSL</i>            | -1,02 | 6,73E-01 | 8,60E-01 |
| <i>LOC388882</i>       | 1,02  | 6,73E-01 | 8,60E-01 |
| <i>FXYD5</i>           | 1,03  | 6,73E-01 | 8,60E-01 |
| <i>NPDC1</i>           | -1,02 | 6,73E-01 | 8,60E-01 |
| <i>ATP4A</i>           | -1,02 | 6,73E-01 | 8,60E-01 |
| <i>STAT2</i>           | 1,02  | 6,73E-01 | 8,60E-01 |
| <i>A_32_P159334</i>    | 1,02  | 6,73E-01 | 8,60E-01 |
| <i>AI801539</i>        | 1,03  | 6,73E-01 | 8,60E-01 |
| <i>THC2315277</i>      | 1,06  | 6,73E-01 | 8,60E-01 |
| <i>A_24_P548624</i>    | -1,02 | 6,74E-01 | 8,60E-01 |
| <i>FLJ11827</i>        | -1,01 | 6,74E-01 | 8,60E-01 |
| <i>A_24_P289565</i>    | 1,01  | 6,74E-01 | 8,60E-01 |
| <i>CHRN4</i>           | 1,02  | 6,74E-01 | 8,60E-01 |
| <i>LOC130355</i>       | 1,02  | 6,74E-01 | 8,60E-01 |
| <i>MCAM</i>            | 1,28  | 6,74E-01 | 8,60E-01 |
| <i>THC2441857</i>      | -1,01 | 6,74E-01 | 8,60E-01 |
| <i>A_24_P246777</i>    | -1,02 | 6,74E-01 | 8,60E-01 |
| <i>THC2318394</i>      | -1,01 | 6,74E-01 | 8,60E-01 |
| <i>BF083139</i>        | 1,02  | 6,74E-01 | 8,60E-01 |
| <i>TRPM8</i>           | 1,02  | 6,74E-01 | 8,60E-01 |
| <i>HRASLS5</i>         | -1,03 | 6,74E-01 | 8,60E-01 |
| <i>tcag7.981</i>       | -1,04 | 6,74E-01 | 8,60E-01 |
| <i>A_24_P919567</i>    | 1,03  | 6,74E-01 | 8,60E-01 |
| <i>LMO4</i>            | -1,03 | 6,74E-01 | 8,60E-01 |
| <i>ACP6</i>            | 1,02  | 6,74E-01 | 8,60E-01 |
| <i>TCIRG1</i>          | -1,02 | 6,74E-01 | 8,60E-01 |
| <i>G6PC2</i>           | 1,01  | 6,74E-01 | 8,60E-01 |
| <i>LOC654433</i>       | -1,08 | 6,74E-01 | 8,60E-01 |
| <i>DAP3</i>            | -1,01 | 6,75E-01 | 8,60E-01 |
| <i>OR1G1</i>           | 1,01  | 6,75E-01 | 8,60E-01 |
| <i>BI759100</i>        | 1,02  | 6,75E-01 | 8,61E-01 |
| <i>CPSF3L</i>          | 1,02  | 6,75E-01 | 8,61E-01 |
| <i>CCT5</i>            | -1,02 | 6,75E-01 | 8,61E-01 |
| <i>AK098307</i>        | 1,03  | 6,75E-01 | 8,61E-01 |
| <i>PCTK1</i>           | 1,02  | 6,75E-01 | 8,61E-01 |
| <i>PCNT</i>            | 1,01  | 6,75E-01 | 8,61E-01 |
| <i>PLG</i>             | -1,02 | 6,75E-01 | 8,61E-01 |
| <i>LOC402176</i>       | -1,02 | 6,75E-01 | 8,61E-01 |
| <i>A_23_P144208</i>    | 1,01  | 6,75E-01 | 8,61E-01 |
| <i>ECHDC1</i>          | -1,01 | 6,75E-01 | 8,61E-01 |
| <i>THC2441242</i>      | -1,01 | 6,75E-01 | 8,61E-01 |
| <i>DUSP21</i>          | 1,02  | 6,75E-01 | 8,61E-01 |
| <i>ENST00000381655</i> | 1,03  | 6,76E-01 | 8,61E-01 |
| <i>C6orf27</i>         | 1,03  | 6,76E-01 | 8,61E-01 |

|                        |       |          |          |
|------------------------|-------|----------|----------|
| <i>GJB2</i>            | -1,17 | 6,76E-01 | 8,61E-01 |
| <i>AF305825</i>        | -1,03 | 6,76E-01 | 8,61E-01 |
| <i>A_24_P940041</i>    | -1,02 | 6,76E-01 | 8,61E-01 |
| <i>PAIP1</i>           | -1,02 | 6,76E-01 | 8,61E-01 |
| <i>AK091942</i>        | -1,02 | 6,76E-01 | 8,61E-01 |
| <i>A_24_P930940</i>    | -1,02 | 6,76E-01 | 8,61E-01 |
| <i>C11orf42</i>        | -1,02 | 6,76E-01 | 8,61E-01 |
| <i>AY358224</i>        | 1,01  | 6,76E-01 | 8,61E-01 |
| <i>LOC647589</i>       | 1,02  | 6,76E-01 | 8,61E-01 |
| <i>THC2372384</i>      | 1,02  | 6,76E-01 | 8,61E-01 |
| <i>CAMK4</i>           | 1,02  | 6,76E-01 | 8,61E-01 |
| <i>BQ310837</i>        | 1,02  | 6,76E-01 | 8,61E-01 |
| <i>TP53BP2</i>         | 1,02  | 6,76E-01 | 8,61E-01 |
| <i>A_23_P21907</i>     | -1,03 | 6,76E-01 | 8,61E-01 |
| <i>FLJ13744</i>        | 1,02  | 6,76E-01 | 8,61E-01 |
| <i>AL833331</i>        | -1,03 | 6,76E-01 | 8,62E-01 |
| <i>LDLRAD3</i>         | -1,02 | 6,76E-01 | 8,62E-01 |
| <i>THC2286831</i>      | -1,02 | 6,76E-01 | 8,62E-01 |
| <i>A_24_P912985</i>    | 1,02  | 6,76E-01 | 8,62E-01 |
| <i>A_24_P754989</i>    | 1,04  | 6,76E-01 | 8,62E-01 |
| <i>ENST00000327026</i> | 1,01  | 6,77E-01 | 8,62E-01 |
| <i>BX108468</i>        | 1,02  | 6,77E-01 | 8,62E-01 |
| <i>SLC13A2</i>         | -1,02 | 6,77E-01 | 8,62E-01 |
| <i>C9orf100</i>        | 1,01  | 6,77E-01 | 8,62E-01 |
| <i>A_24_P256060</i>    | 1,01  | 6,77E-01 | 8,62E-01 |
| <i>ANXA2</i>           | 1,03  | 6,77E-01 | 8,62E-01 |
| <i>LOC152667</i>       | -1,01 | 6,77E-01 | 8,62E-01 |
| <i>CCL22</i>           | -1,03 | 6,77E-01 | 8,62E-01 |
| <i>A_24_P885303</i>    | -1,02 | 6,77E-01 | 8,62E-01 |
| <i>MRPL39</i>          | 1,01  | 6,77E-01 | 8,62E-01 |
| <i>ARL6IP</i>          | 1,02  | 6,77E-01 | 8,62E-01 |
| <i>KBTBD3</i>          | -1,02 | 6,77E-01 | 8,62E-01 |
| <i>RAF1</i>            | 1,01  | 6,77E-01 | 8,62E-01 |
| <i>TRHDE</i>           | 1,02  | 6,77E-01 | 8,62E-01 |
| <i>ZIM2</i>            | 1,02  | 6,77E-01 | 8,62E-01 |
| <i>CR742006</i>        | -1,01 | 6,77E-01 | 8,62E-01 |
| <i>CA945082</i>        | -1,03 | 6,78E-01 | 8,62E-01 |
| <i>THC2317292</i>      | -1,01 | 6,78E-01 | 8,62E-01 |
| <i>LENG12</i>          | 1,01  | 6,78E-01 | 8,62E-01 |
| <i>BC104151</i>        | -1,02 | 6,78E-01 | 8,62E-01 |
| <i>AK000924</i>        | 1,02  | 6,78E-01 | 8,62E-01 |
| <i>LONPL</i>           | -1,01 | 6,78E-01 | 8,62E-01 |
| <i>FAM12B</i>          | -1,01 | 6,78E-01 | 8,62E-01 |
| <i>LOC284948</i>       | -1,01 | 6,78E-01 | 8,62E-01 |

|                 |       |          |          |
|-----------------|-------|----------|----------|
| MAPK15          | -1,01 | 6,78E-01 | 8,62E-01 |
| BC051368        | 1,01  | 6,78E-01 | 8,62E-01 |
| AK056365        | 1,02  | 6,78E-01 | 8,62E-01 |
| MGC15523        | -1,02 | 6,78E-01 | 8,63E-01 |
| C1QBP           | -1,02 | 6,78E-01 | 8,63E-01 |
| AF119909        | -1,02 | 6,78E-01 | 8,63E-01 |
| PADI3           | -1,02 | 6,78E-01 | 8,63E-01 |
| PDE6A           | -1,02 | 6,78E-01 | 8,63E-01 |
| TDH             | 1,01  | 6,78E-01 | 8,63E-01 |
| A_32_P45727     | 1,02  | 6,78E-01 | 8,63E-01 |
| RPS9            | 1,02  | 6,78E-01 | 8,63E-01 |
| CB854194        | 1,02  | 6,78E-01 | 8,63E-01 |
| ENST00000359589 | 1,04  | 6,78E-01 | 8,63E-01 |
| A_24_P920949    | 1,03  | 6,78E-01 | 8,63E-01 |
| ENST00000357778 | -1,03 | 6,78E-01 | 8,63E-01 |
| A_24_P273014    | -1,02 | 6,78E-01 | 8,63E-01 |
| A_24_P358279    | -1,02 | 6,78E-01 | 8,63E-01 |
| AK125371        | -1,02 | 6,79E-01 | 8,63E-01 |
| THC2444941      | -1,01 | 6,78E-01 | 8,63E-01 |
| XRN1            | -1,01 | 6,78E-01 | 8,63E-01 |
| CYP2E1          | 1,01  | 6,78E-01 | 8,63E-01 |
| TSPY1           | 1,01  | 6,79E-01 | 8,63E-01 |
| MRPS18C         | 1,01  | 6,79E-01 | 8,63E-01 |
| XPO4            | 1,01  | 6,79E-01 | 8,63E-01 |
| IL23A           | 1,02  | 6,79E-01 | 8,63E-01 |
| LOC441383       | -1,02 | 6,79E-01 | 8,63E-01 |
| BC035146        | -1,01 | 6,79E-01 | 8,63E-01 |
| A_32_P89415     | -1,01 | 6,79E-01 | 8,63E-01 |
| BC038537        | 1,02  | 6,79E-01 | 8,63E-01 |
| ENST00000376793 | 1,02  | 6,79E-01 | 8,63E-01 |
| AKR1B1          | 1,02  | 6,79E-01 | 8,63E-01 |
| ENST00000375486 | 1,05  | 6,79E-01 | 8,63E-01 |
| A_24_P723735    | -1,03 | 6,79E-01 | 8,63E-01 |
| A_24_P84401     | -1,02 | 6,79E-01 | 8,63E-01 |
| ADIPOR2         | -1,02 | 6,79E-01 | 8,63E-01 |
| PHYH            | 1,02  | 6,79E-01 | 8,63E-01 |
| HTR1F           | 1,03  | 6,79E-01 | 8,63E-01 |
| AI359055        | 1,02  | 6,79E-01 | 8,63E-01 |
| CBX1            | -1,02 | 6,79E-01 | 8,63E-01 |
| THC2305770      | -1,02 | 6,80E-01 | 8,63E-01 |
| THC2404359      | -1,02 | 6,80E-01 | 8,63E-01 |
| C1orf119        | -1,02 | 6,80E-01 | 8,63E-01 |
| A_24_P221285    | -1,02 | 6,80E-01 | 8,63E-01 |
| AF130071        | -1,02 | 6,80E-01 | 8,63E-01 |

|                 |       |          |          |
|-----------------|-------|----------|----------|
| AK093333        | -1,02 | 6,79E-01 | 8,63E-01 |
| CBX2            | -1,01 | 6,80E-01 | 8,63E-01 |
| FLJ20487        | 1,01  | 6,79E-01 | 8,63E-01 |
| HNRPCL1         | 1,02  | 6,79E-01 | 8,63E-01 |
| ENST00000375077 | -1,04 | 6,80E-01 | 8,63E-01 |
| TMF1            | 1,02  | 6,80E-01 | 8,63E-01 |
| BC040048        | -1,02 | 6,80E-01 | 8,63E-01 |
| KIR3DL1         | 1,01  | 6,80E-01 | 8,63E-01 |
| AK124399        | -1,02 | 6,80E-01 | 8,63E-01 |
| LOC339316       | -1,01 | 6,80E-01 | 8,63E-01 |
| HSPC171         | 1,02  | 6,80E-01 | 8,63E-01 |
| PITX2           | 1,08  | 6,80E-01 | 8,63E-01 |
| CR611098        | -1,02 | 6,80E-01 | 8,63E-01 |
| C14orf65        | 1,05  | 6,80E-01 | 8,63E-01 |
| BX098660        | -1,03 | 6,80E-01 | 8,63E-01 |
| MYT1            | 1,01  | 6,80E-01 | 8,63E-01 |
| CD176148        | 1,02  | 6,80E-01 | 8,63E-01 |
| A_24_P931244    | 1,03  | 6,80E-01 | 8,64E-01 |
| TLCD1           | -1,03 | 6,80E-01 | 8,64E-01 |
| DONSON          | -1,02 | 6,80E-01 | 8,64E-01 |
| AK000119        | 1,02  | 6,80E-01 | 8,64E-01 |
| BQ548663        | 1,01  | 6,81E-01 | 8,64E-01 |
| C3orf39         | -1,04 | 6,81E-01 | 8,64E-01 |
| CDCA3           | 1,01  | 6,81E-01 | 8,64E-01 |
| A_32_P207929    | 1,02  | 6,81E-01 | 8,64E-01 |
| A_24_P101960    | -1,02 | 6,81E-01 | 8,64E-01 |
| A_24_P927556    | -1,01 | 6,81E-01 | 8,64E-01 |
| A_24_P178444    | 1,02  | 6,81E-01 | 8,64E-01 |
| BTBD16          | -1,04 | 6,81E-01 | 8,64E-01 |
| AK026099        | 1,03  | 6,81E-01 | 8,64E-01 |
| AK021983        | 1,02  | 6,81E-01 | 8,64E-01 |
| RHCG            | -1,19 | 6,81E-01 | 8,64E-01 |
| A_32_P9931      | 1,04  | 6,81E-01 | 8,64E-01 |
| THC2441430      | 1,02  | 6,81E-01 | 8,64E-01 |
| NKX3-1          | -1,19 | 6,81E-01 | 8,64E-01 |
| AK055679        | -1,02 | 6,81E-01 | 8,64E-01 |
| FLJ20309        | 1,01  | 6,81E-01 | 8,64E-01 |
| PGEA1           | -1,02 | 6,82E-01 | 8,64E-01 |
| A_24_P920662    | -1,02 | 6,81E-01 | 8,64E-01 |
| ALAD            | -1,01 | 6,82E-01 | 8,64E-01 |
| AA581414        | 1,02  | 6,81E-01 | 8,64E-01 |
| W95720          | 1,02  | 6,82E-01 | 8,64E-01 |
| NOLA2           | -1,02 | 6,82E-01 | 8,64E-01 |
| AA731356        | 1,03  | 6,82E-01 | 8,64E-01 |

|                        |       |          |          |
|------------------------|-------|----------|----------|
| <i>ENST00000360178</i> | 1,05  | 6,82E-01 | 8,64E-01 |
| <i>FLJ26850</i>        | 1,02  | 6,82E-01 | 8,64E-01 |
| <i>WDR41</i>           | 1,03  | 6,82E-01 | 8,64E-01 |
| <i>ATP5F1</i>          | 1,02  | 6,82E-01 | 8,64E-01 |
| <i>A_32_P63734</i>     | 1,02  | 6,82E-01 | 8,64E-01 |
| <i>PROL1</i>           | 1,02  | 6,82E-01 | 8,65E-01 |
| <i>C11orf60</i>        | -1,01 | 6,82E-01 | 8,65E-01 |
| <i>A_24_P935300</i>    | 1,01  | 6,82E-01 | 8,65E-01 |
| <i>A_24_P912856</i>    | 1,02  | 6,82E-01 | 8,65E-01 |
| <i>HCG4P6</i>          | 1,01  | 6,82E-01 | 8,65E-01 |
| <i>CHRDL2</i>          | -1,13 | 6,82E-01 | 8,65E-01 |
| <i>A_24_P7111</i>      | -1,02 | 6,82E-01 | 8,65E-01 |
| <i>AF400500</i>        | 1,02  | 6,82E-01 | 8,65E-01 |
| <i>GNAO1</i>           | 1,02  | 6,82E-01 | 8,65E-01 |
| <i>FXVD3</i>           | 1,09  | 6,82E-01 | 8,65E-01 |
| <i>SH2D3A</i>          | -1,01 | 6,82E-01 | 8,65E-01 |
| <i>A_24_P932125</i>    | 1,01  | 6,83E-01 | 8,65E-01 |
| <i>PRTFDC1</i>         | -1,02 | 6,83E-01 | 8,65E-01 |
| <i>ABCA5</i>           | -1,02 | 6,83E-01 | 8,65E-01 |
| <i>AI061292</i>        | -1,01 | 6,83E-01 | 8,65E-01 |
| <i>LANCL2</i>          | -1,01 | 6,83E-01 | 8,65E-01 |
| <i>AA719759</i>        | 1,02  | 6,83E-01 | 8,65E-01 |
| <i>MTCH1</i>           | 1,02  | 6,83E-01 | 8,65E-01 |
| <i>ZYX</i>             | 1,03  | 6,83E-01 | 8,65E-01 |
| <i>HSUP1</i>           | 1,03  | 6,83E-01 | 8,65E-01 |
| <i>HTR1B</i>           | -1,01 | 6,83E-01 | 8,65E-01 |
| <i>THC2382871</i>      | 1,02  | 6,83E-01 | 8,65E-01 |
| <i>KLF8</i>            | 1,02  | 6,83E-01 | 8,65E-01 |
| <i>THC2381293</i>      | 1,01  | 6,83E-01 | 8,65E-01 |
| <i>PDCD5</i>           | 1,03  | 6,83E-01 | 8,65E-01 |
| <i>SRP14</i>           | 1,01  | 6,83E-01 | 8,65E-01 |
| <i>THC2407334</i>      | 1,02  | 6,83E-01 | 8,65E-01 |
| <i>FLJ32682</i>        | -1,02 | 6,83E-01 | 8,65E-01 |
| <i>BC031940</i>        | 1,02  | 6,83E-01 | 8,65E-01 |
| <i>IFIT1</i>           | -1,03 | 6,84E-01 | 8,65E-01 |
| <i>AI056776</i>        | 1,02  | 6,84E-01 | 8,65E-01 |
| <i>LEMD1</i>           | -1,02 | 6,84E-01 | 8,65E-01 |
| <i>BE702584</i>        | 1,02  | 6,84E-01 | 8,65E-01 |
| <i>BF827074</i>        | 1,04  | 6,84E-01 | 8,65E-01 |
| <i>SNAPC1</i>          | 1,02  | 6,84E-01 | 8,65E-01 |
| <i>BC062308</i>        | -1,02 | 6,84E-01 | 8,66E-01 |
| <i>BC019583</i>        | -1,02 | 6,84E-01 | 8,66E-01 |
| <i>TKTL1</i>           | -1,02 | 6,84E-01 | 8,66E-01 |
| <i>BI771091</i>        | 1,01  | 6,84E-01 | 8,66E-01 |

|                        |       |          |          |
|------------------------|-------|----------|----------|
| <i>A_32_P41235</i>     | 1,02  | 6,84E-01 | 8,66E-01 |
| <i>A_32_P25838</i>     | 1,02  | 6,84E-01 | 8,66E-01 |
| <i>A_24_P782102</i>    | 1,03  | 6,84E-01 | 8,66E-01 |
| <i>SIL1</i>            | 1,02  | 6,84E-01 | 8,66E-01 |
| <i>A_23_P141785</i>    | -1,02 | 6,84E-01 | 8,66E-01 |
| <i>C20orf195</i>       | -1,02 | 6,84E-01 | 8,66E-01 |
| <i>ENST00000360151</i> | -1,02 | 6,84E-01 | 8,66E-01 |
| <i>STAT5B</i>          | 1,01  | 6,84E-01 | 8,66E-01 |
| <i>BE708118</i>        | 1,02  | 6,84E-01 | 8,66E-01 |
| <i>LMBR1</i>           | 1,02  | 6,84E-01 | 8,66E-01 |
| <i>SCMH1</i>           | 1,02  | 6,84E-01 | 8,66E-01 |
| <i>SERPINB11</i>       | -1,03 | 6,85E-01 | 8,66E-01 |
| <i>AFF3</i>            | -1,02 | 6,84E-01 | 8,66E-01 |
| <i>MIPEP</i>           | -1,02 | 6,85E-01 | 8,66E-01 |
| <i>BC031939</i>        | -1,01 | 6,85E-01 | 8,66E-01 |
| <i>ANKRD57</i>         | 1,02  | 6,85E-01 | 8,66E-01 |
| <i>RBMY2EP</i>         | 1,01  | 6,85E-01 | 8,66E-01 |
| <i>A_23_P251002</i>    | -1,02 | 6,85E-01 | 8,66E-01 |
| <i>THC2242233</i>      | -1,02 | 6,85E-01 | 8,66E-01 |
| <i>AK025112</i>        | -1,01 | 6,85E-01 | 8,66E-01 |
| <i>MAGEA4</i>          | -1,02 | 6,85E-01 | 8,66E-01 |
| <i>MRPL42P5</i>        | -1,03 | 6,85E-01 | 8,66E-01 |
| <i>CR616033</i>        | -1,02 | 6,85E-01 | 8,66E-01 |
| <i>FLJ32955</i>        | 1,01  | 6,85E-01 | 8,66E-01 |
| <i>RFT1</i>            | 1,02  | 6,85E-01 | 8,66E-01 |
| <i>CB305813</i>        | -1,09 | 6,85E-01 | 8,66E-01 |
| <i>MBTPS1</i>          | -1,01 | 6,85E-01 | 8,66E-01 |
| <i>GRAMD2</i>          | 1,01  | 6,85E-01 | 8,66E-01 |
| <i>GSTT2</i>           | -1,05 | 6,85E-01 | 8,66E-01 |
| <i>SEC11L3</i>         | 1,02  | 6,85E-01 | 8,66E-01 |
| <i>THC2363021</i>      | -1,01 | 6,85E-01 | 8,66E-01 |
| <i>RAD51L1</i>         | -1,01 | 6,85E-01 | 8,66E-01 |
| <i>A_32_P20014</i>     | -1,01 | 6,85E-01 | 8,66E-01 |
| <i>TAF1L</i>           | -1,02 | 6,85E-01 | 8,66E-01 |
| <i>KNTC2</i>           | 1,06  | 6,86E-01 | 8,66E-01 |
| <i>ENST00000368646</i> | 1,01  | 6,86E-01 | 8,66E-01 |
| <i>ELP4</i>            | 1,01  | 6,86E-01 | 8,66E-01 |
| <i>THC2340773</i>      | -1,06 | 6,86E-01 | 8,67E-01 |
| <i>A_32_P153361</i>    | 1,01  | 6,86E-01 | 8,67E-01 |
| <i>THC2300291</i>      | 1,01  | 6,86E-01 | 8,67E-01 |
| <i>FLJ22349</i>        | 1,01  | 6,86E-01 | 8,67E-01 |
| <i>MS4A7</i>           | 1,04  | 6,86E-01 | 8,67E-01 |
| <i>FAM71C</i>          | 1,01  | 6,86E-01 | 8,67E-01 |
| <i>A_24_P937489</i>    | 1,02  | 6,86E-01 | 8,67E-01 |



|                     |       |          |          |
|---------------------|-------|----------|----------|
| <i>C21orf124</i>    | 1,01  | 6,86E-01 | 8,67E-01 |
| <i>MGC15476</i>     | -1,05 | 6,86E-01 | 8,67E-01 |
| <i>THC2314516</i>   | -1,02 | 6,86E-01 | 8,67E-01 |
| <i>THC2442550</i>   | 1,02  | 6,86E-01 | 8,67E-01 |
| <i>ITFG3</i>        | 1,02  | 6,86E-01 | 8,67E-01 |
| <i>LNX1</i>         | -1,02 | 6,86E-01 | 8,67E-01 |
| <i>AT_P_M</i>       | 1,01  | 6,86E-01 | 8,67E-01 |
| <i>THC2278663</i>   | 1,02  | 6,86E-01 | 8,67E-01 |
| <i>AB051467</i>     | -1,02 | 6,87E-01 | 8,67E-01 |
| <i>A_24_P753414</i> | 1,03  | 6,87E-01 | 8,67E-01 |
| <i>SLC6A19</i>      | -1,05 | 6,87E-01 | 8,67E-01 |
| <i>A_24_P624522</i> | -1,01 | 6,87E-01 | 8,67E-01 |
| <i>LOC654346</i>    | -1,03 | 6,87E-01 | 8,67E-01 |
| <i>FZD9</i>         | -1,02 | 6,87E-01 | 8,67E-01 |
| <i>ZDHHC8</i>       | -1,02 | 6,87E-01 | 8,67E-01 |
| <i>PRPF38A</i>      | -1,01 | 6,87E-01 | 8,67E-01 |
| <i>BC034915</i>     | 1,01  | 6,87E-01 | 8,67E-01 |
| <i>KIAA0368</i>     | 1,02  | 6,87E-01 | 8,67E-01 |
| <i>AF314543</i>     | 1,02  | 6,87E-01 | 8,67E-01 |
| <i>BCAT2</i>        | 1,02  | 6,87E-01 | 8,67E-01 |
| <i>KIAA0738</i>     | 1,02  | 6,87E-01 | 8,67E-01 |
| <i>HSPC148</i>      | 1,02  | 6,87E-01 | 8,67E-01 |
| <i>A_24_P913096</i> | 1,03  | 6,87E-01 | 8,67E-01 |
| <i>A_23_P136392</i> | 1,03  | 6,87E-01 | 8,67E-01 |
| <i>38047</i>        | -1,02 | 6,87E-01 | 8,67E-01 |
| <i>GOT2</i>         | -1,02 | 6,87E-01 | 8,67E-01 |
| <i>BF947045</i>     | -1,02 | 6,87E-01 | 8,67E-01 |
| <i>PGM5</i>         | 1,06  | 6,88E-01 | 8,68E-01 |
| <i>BI024548</i>     | -1,03 | 6,88E-01 | 8,68E-01 |
| <i>CDC45L</i>       | 1,03  | 6,88E-01 | 8,68E-01 |
| <i>LRRC4</i>        | -1,03 | 6,88E-01 | 8,68E-01 |
| <i>SVH</i>          | -1,01 | 6,88E-01 | 8,68E-01 |
| <i>BC032026</i>     | -1,01 | 6,88E-01 | 8,68E-01 |
| <i>A_23_P119168</i> | 1,01  | 6,88E-01 | 8,68E-01 |
| <i>BX437418</i>     | -1,02 | 6,88E-01 | 8,68E-01 |
| <i>C19orf21</i>     | 1,02  | 6,88E-01 | 8,68E-01 |
| <i>A_24_P76288</i>  | 1,04  | 6,88E-01 | 8,68E-01 |
| <i>DCAMKL1</i>      | -1,05 | 6,88E-01 | 8,68E-01 |
| <i>THC2312468</i>   | 1,02  | 6,88E-01 | 8,68E-01 |
| <i>PPP3CB</i>       | -1,02 | 6,88E-01 | 8,68E-01 |
| <i>AI276956</i>     | -1,02 | 6,88E-01 | 8,68E-01 |
| <i>A_23_P28927</i>  | -1,01 | 6,88E-01 | 8,68E-01 |
| <i>A_24_P681266</i> | -1,02 | 6,88E-01 | 8,68E-01 |
| <i>TPBG</i>         | -1,03 | 6,88E-01 | 8,68E-01 |

|                 |       |          |          |
|-----------------|-------|----------|----------|
| A4GNT           | -1,01 | 6,88E-01 | 8,68E-01 |
| THC2444097      | 1,01  | 6,88E-01 | 8,68E-01 |
| BC045098        | 1,01  | 6,88E-01 | 8,68E-01 |
| CK818527        | 1,02  | 6,88E-01 | 8,68E-01 |
| BE716310        | -1,06 | 6,89E-01 | 8,68E-01 |
| C10orf59        | 1,01  | 6,89E-01 | 8,68E-01 |
| SERPIN1         | 1,03  | 6,89E-01 | 8,68E-01 |
| AW191706        | 1,05  | 6,89E-01 | 8,68E-01 |
| THC2316466      | -1,02 | 6,89E-01 | 8,68E-01 |
| THC2442210      | -1,05 | 6,89E-01 | 8,68E-01 |
| SLC2A13         | -1,03 | 6,89E-01 | 8,68E-01 |
| A_24_P118953    | -1,03 | 6,89E-01 | 8,68E-01 |
| AK124173        | -1,02 | 6,89E-01 | 8,68E-01 |
| KSR1            | -1,01 | 6,89E-01 | 8,68E-01 |
| ENST00000343945 | 1,01  | 6,89E-01 | 8,68E-01 |
| A_24_P831005    | 1,01  | 6,89E-01 | 8,68E-01 |
| AF143325        | 1,03  | 6,89E-01 | 8,68E-01 |
| AK022645        | 1,02  | 6,89E-01 | 8,68E-01 |
| CEACAM3         | -1,01 | 6,89E-01 | 8,69E-01 |
| BOP1            | 1,02  | 6,89E-01 | 8,69E-01 |
| ENST00000306634 | -1,02 | 6,89E-01 | 8,69E-01 |
| THC2442107      | -1,01 | 6,90E-01 | 8,69E-01 |
| CDK7            | 1,01  | 6,89E-01 | 8,69E-01 |
| ANGPTL6         | 1,01  | 6,90E-01 | 8,69E-01 |
| A_24_P587993    | 1,01  | 6,89E-01 | 8,69E-01 |
| OPRL1           | -1,02 | 6,90E-01 | 8,69E-01 |
| RNF32           | -1,01 | 6,90E-01 | 8,69E-01 |
| ENST00000307106 | 1,02  | 6,90E-01 | 8,69E-01 |
| PARD3           | 1,02  | 6,90E-01 | 8,69E-01 |
| CLEC11A         | -1,03 | 6,90E-01 | 8,69E-01 |
| SOX13           | -1,02 | 6,90E-01 | 8,69E-01 |
| THC2367473      | -1,01 | 6,90E-01 | 8,69E-01 |
| A_24_P195556    | -1,05 | 6,90E-01 | 8,69E-01 |
| HYDIN           | -1,01 | 6,90E-01 | 8,69E-01 |
| THC2268035      | -1,01 | 6,90E-01 | 8,69E-01 |
| FXVD7           | 1,02  | 6,90E-01 | 8,69E-01 |
| GMEB1           | 1,01  | 6,90E-01 | 8,69E-01 |
| ASAM            | 1,04  | 6,90E-01 | 8,69E-01 |
| TCEB3B          | 1,01  | 6,90E-01 | 8,69E-01 |
| ENST00000289382 | 1,01  | 6,90E-01 | 8,69E-01 |
| C9orf128        | 1,02  | 6,90E-01 | 8,69E-01 |
| OTX1            | 1,01  | 6,91E-01 | 8,69E-01 |
| THC2275025      | -1,03 | 6,91E-01 | 8,69E-01 |
| BX091899        | 1,02  | 6,91E-01 | 8,69E-01 |

|                 |       |          |          |
|-----------------|-------|----------|----------|
| AK022228        | 1,02  | 6,91E-01 | 8,69E-01 |
| STAC            | 1,04  | 6,91E-01 | 8,69E-01 |
| AF113013        | -1,05 | 6,91E-01 | 8,69E-01 |
| C2orf3          | -1,02 | 6,91E-01 | 8,70E-01 |
| HPX             | 1,02  | 6,91E-01 | 8,70E-01 |
| UHRF2           | -1,01 | 6,91E-01 | 8,70E-01 |
| THC2281747      | -1,01 | 6,91E-01 | 8,70E-01 |
| C14orf139       | -1,02 | 6,91E-01 | 8,70E-01 |
| ATP8B2          | -1,02 | 6,91E-01 | 8,70E-01 |
| A_32_P200833    | 1,02  | 6,91E-01 | 8,70E-01 |
| A_24_P358538    | -1,03 | 6,91E-01 | 8,70E-01 |
| CCDC40          | -1,03 | 6,91E-01 | 8,70E-01 |
| ARID3B          | -1,02 | 6,91E-01 | 8,70E-01 |
| ENST00000338509 | -1,02 | 6,91E-01 | 8,70E-01 |
| BC020897        | 1,01  | 6,91E-01 | 8,70E-01 |
| BCORL1          | 1,02  | 6,91E-01 | 8,70E-01 |
| A_24_P915117    | 1,02  | 6,91E-01 | 8,70E-01 |
| SOX18           | 1,02  | 6,91E-01 | 8,70E-01 |
| MAP6D1          | 1,01  | 6,92E-01 | 8,70E-01 |
| BQ287889        | -1,02 | 6,92E-01 | 8,70E-01 |
| AK126242        | -1,02 | 6,92E-01 | 8,70E-01 |
| ZCCHC4          | -1,01 | 6,92E-01 | 8,70E-01 |
| UNQ1940         | -1,01 | 6,92E-01 | 8,70E-01 |
| KRTAP3-3        | -1,01 | 6,92E-01 | 8,70E-01 |
| HSPB7           | 1,04  | 6,92E-01 | 8,70E-01 |
| A_24_P126931    | 1,02  | 6,92E-01 | 8,70E-01 |
| A_24_P758926    | -1,01 | 6,92E-01 | 8,70E-01 |
| SDCCAG3         | 1,01  | 6,92E-01 | 8,70E-01 |
| CR600872        | 1,03  | 6,92E-01 | 8,70E-01 |
| AL096727        | -1,03 | 6,92E-01 | 8,70E-01 |
| GTPBP2          | -1,01 | 6,92E-01 | 8,70E-01 |
| BX099682        | -1,01 | 6,92E-01 | 8,70E-01 |
| LUZPP1          | -1,02 | 6,92E-01 | 8,70E-01 |
| RBMX1A1         | 1,01  | 6,92E-01 | 8,70E-01 |
| ENST00000292140 | 1,03  | 6,92E-01 | 8,70E-01 |
| C8orf54         | 1,01  | 6,92E-01 | 8,70E-01 |
| LOC644319       | -1,02 | 6,93E-01 | 8,71E-01 |
| LTB4R           | 1,02  | 6,93E-01 | 8,71E-01 |
| NALP13          | -1,02 | 6,93E-01 | 8,71E-01 |
| THC2374772      | 1,02  | 6,93E-01 | 8,71E-01 |
| CR613654        | -1,02 | 6,93E-01 | 8,71E-01 |
| AF116665        | 1,01  | 6,93E-01 | 8,71E-01 |
| NRSN2           | 1,02  | 6,93E-01 | 8,71E-01 |
| SYBL1           | 1,02  | 6,93E-01 | 8,71E-01 |

|                        |       |          |          |
|------------------------|-------|----------|----------|
| <i>OR8G1</i>           | 1,02  | 6,93E-01 | 8,71E-01 |
| <i>E1A_r60_a104</i>    | 1,11  | 6,93E-01 | 8,71E-01 |
| <i>BF337308</i>        | -1,04 | 6,93E-01 | 8,71E-01 |
| <i>CK821950</i>        | -1,02 | 6,93E-01 | 8,71E-01 |
| <i>OR4C3</i>           | -1,02 | 6,93E-01 | 8,71E-01 |
| <i>A_24_P392790</i>    | -1,02 | 6,93E-01 | 8,71E-01 |
| <i>ENST00000359659</i> | -1,01 | 6,93E-01 | 8,71E-01 |
| <i>DKFZP586H2123</i>   | 1,07  | 6,93E-01 | 8,71E-01 |
| <i>THC2307600</i>      | 1,03  | 6,93E-01 | 8,71E-01 |
| <i>UNQ6490</i>         | -1,06 | 6,93E-01 | 8,71E-01 |
| <i>SYT9</i>            | -1,03 | 6,93E-01 | 8,71E-01 |
| <i>A_24_P929166</i>    | 1,02  | 6,93E-01 | 8,71E-01 |
| <i>A_24_P572229</i>    | -1,04 | 6,93E-01 | 8,71E-01 |
| <i>DIP2A</i>           | 1,01  | 6,93E-01 | 8,71E-01 |
| <i>A_32_P172002</i>    | -1,02 | 6,94E-01 | 8,71E-01 |
| <i>THC2406595</i>      | 1,02  | 6,94E-01 | 8,71E-01 |
| <i>EXOC4</i>           | -1,01 | 6,94E-01 | 8,71E-01 |
| <i>LOC664727</i>       | -1,02 | 6,94E-01 | 8,71E-01 |
| <i>ESRRG</i>           | -1,02 | 6,94E-01 | 8,71E-01 |
| <i>PPBPL2</i>          | 1,02  | 6,94E-01 | 8,71E-01 |
| <i>ENST00000355888</i> | 1,02  | 6,94E-01 | 8,71E-01 |
| <i>A_24_P931699</i>    | 1,02  | 6,94E-01 | 8,71E-01 |
| <i>ACTG2</i>           | 1,12  | 6,94E-01 | 8,71E-01 |
| <i>PNPLA1</i>          | 1,02  | 6,94E-01 | 8,71E-01 |
| <i>KIAA0182</i>        | 1,02  | 6,94E-01 | 8,71E-01 |
| <i>A_24_P242319</i>    | -1,02 | 6,94E-01 | 8,72E-01 |
| <i>TRADD</i>           | 1,01  | 6,94E-01 | 8,72E-01 |
| <i>ARSD</i>            | -1,02 | 6,95E-01 | 8,72E-01 |
| <i>THC2442487</i>      | 1,01  | 6,95E-01 | 8,72E-01 |
| <i>THC2443609</i>      | 1,02  | 6,95E-01 | 8,72E-01 |
| <i>EYA1</i>            | 1,08  | 6,95E-01 | 8,72E-01 |
| <i>A_24_P213284</i>    | -1,02 | 6,95E-01 | 8,72E-01 |
| <i>CORO7</i>           | 1,02  | 6,95E-01 | 8,72E-01 |
| <i>AK024127</i>        | -1,02 | 6,95E-01 | 8,72E-01 |
| <i>BC017209</i>        | 1,02  | 6,95E-01 | 8,72E-01 |
| <i>LOC401021</i>       | -1,02 | 6,95E-01 | 8,72E-01 |
| <i>ENST00000362067</i> | 1,01  | 6,95E-01 | 8,72E-01 |
| <i>A_24_P650562</i>    | 1,03  | 6,95E-01 | 8,72E-01 |
| <i>dJ222E13.2</i>      | -1,02 | 6,95E-01 | 8,72E-01 |
| <i>GOLGA8E</i>         | -1,03 | 6,95E-01 | 8,72E-01 |
| <i>THC2412419</i>      | -1,02 | 6,96E-01 | 8,72E-01 |
| <i>SLC39A5</i>         | -1,01 | 6,95E-01 | 8,72E-01 |
| <i>CANT1</i>           | 1,01  | 6,95E-01 | 8,72E-01 |
| <i>MGC5590</i>         | 1,02  | 6,96E-01 | 8,72E-01 |

|                        |       |          |          |
|------------------------|-------|----------|----------|
| <i>PCDHGB7</i>         | 1,02  | 6,95E-01 | 8,72E-01 |
| <i>THC2385477</i>      | 1,02  | 6,96E-01 | 8,72E-01 |
| <i>ZNF575</i>          | 1,02  | 6,96E-01 | 8,72E-01 |
| <i>SEC61G</i>          | 1,02  | 6,95E-01 | 8,72E-01 |
| <i>A_32_P23187</i>     | 1,03  | 6,95E-01 | 8,72E-01 |
| <i>GGH</i>             | 1,03  | 6,95E-01 | 8,72E-01 |
| <i>A_24_P872838</i>    | 1,03  | 6,96E-01 | 8,72E-01 |
| <i>LGALS3</i>          | 1,02  | 6,96E-01 | 8,72E-01 |
| <i>CST3</i>            | 1,02  | 6,96E-01 | 8,72E-01 |
| <i>SENP3</i>           | 1,01  | 6,96E-01 | 8,72E-01 |
| <i>DEFA5</i>           | -1,02 | 6,96E-01 | 8,72E-01 |
| <i>IRF8</i>            | -1,02 | 6,96E-01 | 8,72E-01 |
| <i>KIR2DL5A</i>        | -1,02 | 6,96E-01 | 8,72E-01 |
| <i>A_32_P183367</i>    | -1,02 | 6,96E-01 | 8,72E-01 |
| <i>KIAA1542</i>        | -1,02 | 6,96E-01 | 8,72E-01 |
| <i>F03017</i>          | -1,01 | 6,96E-01 | 8,72E-01 |
| <i>MMEL1</i>           | -1,01 | 6,96E-01 | 8,72E-01 |
| <i>AY358236</i>        | 1,01  | 6,96E-01 | 8,72E-01 |
| <i>EFTUD2</i>          | 1,02  | 6,96E-01 | 8,72E-01 |
| <i>LALBA</i>           | 1,01  | 6,96E-01 | 8,72E-01 |
| <i>ENST00000289105</i> | -1,02 | 6,96E-01 | 8,73E-01 |
| <i>RIOK3</i>           | -1,02 | 6,96E-01 | 8,73E-01 |
| <i>NR2E1</i>           | -1,01 | 6,96E-01 | 8,73E-01 |
| <i>CDK5RAP1</i>        | 1,01  | 6,96E-01 | 8,73E-01 |
| <i>BU631174</i>        | 1,01  | 6,96E-01 | 8,73E-01 |
| <i>A_24_P92411</i>     | -1,02 | 6,96E-01 | 8,73E-01 |
| <i>KRTAP12-1</i>       | 1,01  | 6,96E-01 | 8,73E-01 |
| <i>GJA5</i>            | 1,03  | 6,96E-01 | 8,73E-01 |
| <i>FLJ25102</i>        | 1,05  | 6,96E-01 | 8,73E-01 |
| <i>CR594735</i>        | 1,02  | 6,97E-01 | 8,73E-01 |
| <i>UBQLN4</i>          | -1,02 | 6,97E-01 | 8,73E-01 |
| <i>MPPE1</i>           | -1,01 | 6,97E-01 | 8,73E-01 |
| <i>THC2339904</i>      | -1,01 | 6,97E-01 | 8,73E-01 |
| <i>ENST00000355629</i> | 1,01  | 6,97E-01 | 8,73E-01 |
| <i>C20orf7</i>         | 1,02  | 6,97E-01 | 8,73E-01 |
| <i>LDLRAP1</i>         | 1,01  | 6,97E-01 | 8,73E-01 |
| <i>THC2308781</i>      | 1,02  | 6,97E-01 | 8,73E-01 |
| <i>C12orf26</i>        | -1,01 | 6,97E-01 | 8,73E-01 |
| <i>ENST00000306804</i> | -1,05 | 6,97E-01 | 8,73E-01 |
| <i>D55639</i>          | 1,02  | 6,97E-01 | 8,73E-01 |
| <i>HRG</i>             | 1,02  | 6,97E-01 | 8,73E-01 |
| <i>A_32_P92500</i>     | 1,02  | 6,97E-01 | 8,73E-01 |
| <i>CR618371</i>        | -1,02 | 6,97E-01 | 8,73E-01 |
| <i>A_32_P126688</i>    | -1,02 | 6,97E-01 | 8,73E-01 |

|                 |       |          |          |
|-----------------|-------|----------|----------|
| AK024714        | -1,02 | 6,97E-01 | 8,73E-01 |
| A_24_P820663    | -1,01 | 6,97E-01 | 8,73E-01 |
| THC2342480      | 1,01  | 6,97E-01 | 8,73E-01 |
| NFXL1           | 1,02  | 6,97E-01 | 8,73E-01 |
| THC2401081      | -1,05 | 6,97E-01 | 8,73E-01 |
| SPATS2          | -1,01 | 6,97E-01 | 8,73E-01 |
| PNN             | -1,02 | 6,98E-01 | 8,73E-01 |
| HERC3           | -1,02 | 6,98E-01 | 8,73E-01 |
| FAM103A1        | -1,01 | 6,98E-01 | 8,73E-01 |
| SLC6A5          | 1,01  | 6,98E-01 | 8,73E-01 |
| ETG09_35454     | 1,01  | 6,98E-01 | 8,73E-01 |
| SFMBT2          | 1,02  | 6,98E-01 | 8,73E-01 |
| CR592318        | 1,02  | 6,97E-01 | 8,73E-01 |
| DSC3            | 1,07  | 6,97E-01 | 8,73E-01 |
| CDH10           | 1,07  | 6,98E-01 | 8,73E-01 |
| ENST00000373765 | -1,02 | 6,98E-01 | 8,73E-01 |
| LOC51190        | -1,01 | 6,98E-01 | 8,73E-01 |
| A_24_P912186    | 1,02  | 6,98E-01 | 8,73E-01 |
| THC2404896      | 1,02  | 6,98E-01 | 8,73E-01 |
| LCE1C           | 1,03  | 6,98E-01 | 8,73E-01 |
| OR1N2           | 1,01  | 6,98E-01 | 8,73E-01 |
| TRIM59          | 1,02  | 6,98E-01 | 8,73E-01 |
| PYY             | 1,01  | 6,98E-01 | 8,74E-01 |
| BC014452        | -1,01 | 6,98E-01 | 8,74E-01 |
| AK095904        | -1,03 | 6,99E-01 | 8,74E-01 |
| GPR83           | -1,01 | 6,99E-01 | 8,74E-01 |
| PRSS1           | 1,01  | 6,99E-01 | 8,74E-01 |
| A_24_P464798    | 1,04  | 6,99E-01 | 8,74E-01 |
| PWP2H           | 1,01  | 6,99E-01 | 8,74E-01 |
| CR594528        | 1,05  | 6,99E-01 | 8,74E-01 |
| C3orf44         | -1,01 | 6,99E-01 | 8,74E-01 |
| NRM             | 1,02  | 6,99E-01 | 8,74E-01 |
| KIAA1822        | -1,02 | 6,99E-01 | 8,74E-01 |
| CN431194        | 1,01  | 6,99E-01 | 8,74E-01 |
| COL13A1         | -1,06 | 6,99E-01 | 8,74E-01 |
| THC2354354      | -1,02 | 6,99E-01 | 8,74E-01 |
| THC2378620      | -1,01 | 6,99E-01 | 8,74E-01 |
| GTF2H1          | -1,01 | 6,99E-01 | 8,74E-01 |
| DJ12208.2       | 1,01  | 6,99E-01 | 8,74E-01 |
| A_32_P113646    | 1,01  | 6,99E-01 | 8,74E-01 |
| A_32_P135790    | 1,01  | 6,99E-01 | 8,74E-01 |
| CYP17A1         | 1,02  | 6,99E-01 | 8,74E-01 |
| A_32_P63236     | 1,02  | 6,99E-01 | 8,74E-01 |
| THC2436745      | 1,02  | 6,99E-01 | 8,74E-01 |

|                 |       |          |          |
|-----------------|-------|----------|----------|
| SEH1L           | 1,02  | 6,99E-01 | 8,74E-01 |
| ENST00000367245 | 1,02  | 6,99E-01 | 8,74E-01 |
| A_24_P933291    | -1,01 | 7,00E-01 | 8,74E-01 |
| AF086196        | -1,02 | 7,00E-01 | 8,74E-01 |
| APRT            | -1,01 | 7,00E-01 | 8,75E-01 |
| A_24_P919178    | -1,02 | 7,00E-01 | 8,75E-01 |
| IARS2           | -1,02 | 7,00E-01 | 8,75E-01 |
| LOC388494       | -1,01 | 7,00E-01 | 8,75E-01 |
| A_24_P669854    | -1,01 | 7,00E-01 | 8,75E-01 |
| MDP-1           | 1,01  | 7,00E-01 | 8,75E-01 |
| BC042091        | -1,01 | 7,00E-01 | 8,75E-01 |
| GULP1           | 1,02  | 7,00E-01 | 8,75E-01 |
| CD300E          | -1,02 | 7,00E-01 | 8,75E-01 |
| CA944758        | -1,02 | 7,00E-01 | 8,75E-01 |
| ABCG4           | 1,02  | 7,00E-01 | 8,75E-01 |
| THC2349421      | -1,02 | 7,00E-01 | 8,75E-01 |
| A_24_P75558     | 1,04  | 7,00E-01 | 8,75E-01 |
| AI076466        | 1,02  | 7,01E-01 | 8,75E-01 |
| CV390614        | 1,02  | 7,01E-01 | 8,75E-01 |
| CRIPAK          | -1,03 | 7,01E-01 | 8,75E-01 |
| ZNF383          | -1,02 | 7,01E-01 | 8,75E-01 |
| THC2439499      | 1,02  | 7,01E-01 | 8,75E-01 |
| THC2338812      | -1,02 | 7,01E-01 | 8,75E-01 |
| TAF15           | -1,02 | 7,01E-01 | 8,75E-01 |
| A_24_P935506    | -1,01 | 7,01E-01 | 8,75E-01 |
| TLE6            | -1,01 | 7,01E-01 | 8,75E-01 |
| THC2391445      | -1,01 | 7,01E-01 | 8,75E-01 |
| MRPL37          | 1,02  | 7,01E-01 | 8,75E-01 |
| AK094526        | 1,02  | 7,01E-01 | 8,75E-01 |
| PARP12          | -1,02 | 7,01E-01 | 8,75E-01 |
| OR2W1           | -1,01 | 7,01E-01 | 8,75E-01 |
| BXDC2           | 1,01  | 7,01E-01 | 8,75E-01 |
| FLYWCH1         | 1,02  | 7,01E-01 | 8,75E-01 |
| OR2A14          | -1,02 | 7,01E-01 | 8,75E-01 |
| SEC63           | 1,01  | 7,01E-01 | 8,75E-01 |
| HTR2A           | 1,07  | 7,01E-01 | 8,75E-01 |
| AW978845        | 1,02  | 7,01E-01 | 8,75E-01 |
| PNPT1           | 1,01  | 7,02E-01 | 8,75E-01 |
| A_24_P203976    | -1,04 | 7,02E-01 | 8,75E-01 |
| KIAA0265        | -1,02 | 7,02E-01 | 8,75E-01 |
| AF060169        | 1,02  | 7,02E-01 | 8,75E-01 |
| GPR142          | 1,02  | 7,02E-01 | 8,75E-01 |
| AJ420487        | -1,02 | 7,02E-01 | 8,75E-01 |
| NDUFB5          | -1,02 | 7,02E-01 | 8,75E-01 |

|                        |       |          |          |
|------------------------|-------|----------|----------|
| <i>ENST00000316861</i> | -1,02 | 7,02E-01 | 8,75E-01 |
| <i>DGAT2L3</i>         | 1,02  | 7,02E-01 | 8,75E-01 |
| <i>ERGIC3</i>          | 1,02  | 7,02E-01 | 8,75E-01 |
| <i>A_24_P418517</i>    | -1,07 | 7,02E-01 | 8,76E-01 |
| <i>A_32_P101019</i>    | -1,03 | 7,02E-01 | 8,76E-01 |
| <i>DEFA6</i>           | 1,01  | 7,02E-01 | 8,76E-01 |
| <i>BC020888</i>        | 1,04  | 7,02E-01 | 8,76E-01 |
| <i>KIAA0020</i>        | -1,01 | 7,02E-01 | 8,76E-01 |
| <i>ENST00000377156</i> | 1,01  | 7,02E-01 | 8,76E-01 |
| <i>BC042853</i>        | -1,02 | 7,02E-01 | 8,76E-01 |
| <i>AB070620</i>        | -1,01 | 7,02E-01 | 8,76E-01 |
| <i>AI420834</i>        | 1,01  | 7,02E-01 | 8,76E-01 |
| <i>A_24_P314290</i>    | -1,02 | 7,02E-01 | 8,76E-01 |
| <i>AK024292</i>        | -1,01 | 7,02E-01 | 8,76E-01 |
| <i>A_24_P332902</i>    | -1,01 | 7,02E-01 | 8,76E-01 |
| <i>THC2360304</i>      | 1,01  | 7,02E-01 | 8,76E-01 |
| <i>C11orf56</i>        | 1,01  | 7,03E-01 | 8,76E-01 |
| <i>MYO3B</i>           | 1,01  | 7,03E-01 | 8,76E-01 |
| <i>A_24_P929524</i>    | 1,01  | 7,03E-01 | 8,76E-01 |
| <i>AP2B1</i>           | 1,02  | 7,03E-01 | 8,76E-01 |
| <i>ENST00000312785</i> | 1,04  | 7,03E-01 | 8,76E-01 |
| <i>THC2373429</i>      | -1,03 | 7,03E-01 | 8,76E-01 |
| <i>LCMT1</i>           | 1,01  | 7,03E-01 | 8,76E-01 |
| <i>BX537819</i>        | 1,02  | 7,03E-01 | 8,76E-01 |
| <i>AF086337</i>        | 1,02  | 7,03E-01 | 8,76E-01 |
| <i>THC2282727</i>      | 1,04  | 7,03E-01 | 8,76E-01 |
| <i>IMMP2L</i>          | 1,02  | 7,03E-01 | 8,76E-01 |
| <i>FLJ40919</i>        | 1,02  | 7,03E-01 | 8,76E-01 |
| <i>ENST00000341638</i> | -1,03 | 7,03E-01 | 8,76E-01 |
| <i>THC2305642</i>      | -1,01 | 7,03E-01 | 8,76E-01 |
| <i>WBSCR27</i>         | -1,04 | 7,03E-01 | 8,76E-01 |
| <i>A_32_P231547</i>    | -1,02 | 7,03E-01 | 8,76E-01 |
| <i>FASTK</i>           | -1,02 | 7,04E-01 | 8,76E-01 |
| <i>HIST1H2BG</i>       | -1,01 | 7,04E-01 | 8,76E-01 |
| <i>ZNF445</i>          | -1,01 | 7,04E-01 | 8,76E-01 |
| <i>TKTL2</i>           | -1,01 | 7,03E-01 | 8,76E-01 |
| <i>FLAD1</i>           | -1,01 | 7,03E-01 | 8,76E-01 |
| <i>MBD1</i>            | -1,01 | 7,03E-01 | 8,76E-01 |
| <i>MGC13053</i>        | 1,01  | 7,03E-01 | 8,76E-01 |
| <i>CNGA4</i>           | 1,02  | 7,04E-01 | 8,76E-01 |
| <i>A_23_P63972</i>     | 1,02  | 7,03E-01 | 8,76E-01 |
| <i>TNFSF12</i>         | 1,02  | 7,03E-01 | 8,76E-01 |
| <i>MIR16</i>           | 1,02  | 7,03E-01 | 8,76E-01 |
| <i>ENST00000373295</i> | 1,02  | 7,03E-01 | 8,76E-01 |



|                 |       |          |          |
|-----------------|-------|----------|----------|
| SLC17A5         | 1,02  | 7,04E-01 | 8,76E-01 |
| ENST00000373208 | 1,06  | 7,04E-01 | 8,76E-01 |
| LOC642769       | -1,02 | 7,04E-01 | 8,76E-01 |
| BC025775        | -1,01 | 7,04E-01 | 8,76E-01 |
| MUC8            | 1,01  | 7,04E-01 | 8,76E-01 |
| ACOX3           | 1,02  | 7,04E-01 | 8,76E-01 |
| AMBP            | -1,01 | 7,04E-01 | 8,76E-01 |
| C21orf116       | 1,01  | 7,04E-01 | 8,76E-01 |
| A_24_P868987    | -1,03 | 7,04E-01 | 8,76E-01 |
| ENST00000369864 | -1,03 | 7,04E-01 | 8,76E-01 |
| THC2439400      | -1,03 | 7,04E-01 | 8,76E-01 |
| A_32_P100206    | -1,01 | 7,04E-01 | 8,76E-01 |
| SSU72           | -1,01 | 7,04E-01 | 8,76E-01 |
| COG7            | -1,02 | 7,04E-01 | 8,77E-01 |
| LOC280665       | -1,06 | 7,04E-01 | 8,77E-01 |
| THC2410448      | -1,02 | 7,04E-01 | 8,77E-01 |
| LOC389023       | 1,02  | 7,04E-01 | 8,77E-01 |
| PSMC6           | -1,01 | 7,05E-01 | 8,77E-01 |
| ENST00000315707 | 1,01  | 7,05E-01 | 8,77E-01 |
| BC034617        | 1,02  | 7,05E-01 | 8,77E-01 |
| MDN1            | 1,02  | 7,05E-01 | 8,77E-01 |
| LOC399900       | 1,02  | 7,05E-01 | 8,77E-01 |
| LTBP4           | 1,02  | 7,05E-01 | 8,77E-01 |
| NFIA            | 1,02  | 7,05E-01 | 8,77E-01 |
| STMN2           | -1,07 | 7,05E-01 | 8,77E-01 |
| RPTN            | -1,04 | 7,05E-01 | 8,77E-01 |
| CCDC37          | -1,02 | 7,05E-01 | 8,77E-01 |
| IFP38           | -1,02 | 7,05E-01 | 8,77E-01 |
| PLD2            | -1,02 | 7,05E-01 | 8,77E-01 |
| THC2275100      | -1,01 | 7,05E-01 | 8,77E-01 |
| HSD17B2         | 1,01  | 7,05E-01 | 8,77E-01 |
| CD2BP2          | 1,01  | 7,05E-01 | 8,77E-01 |
| BI494022        | -1,02 | 7,06E-01 | 8,77E-01 |
| THC2304672      | -1,02 | 7,06E-01 | 8,77E-01 |
| A_24_P41593     | -1,02 | 7,06E-01 | 8,77E-01 |
| THC2336333      | -1,02 | 7,06E-01 | 8,77E-01 |
| AU149534        | -1,01 | 7,06E-01 | 8,77E-01 |
| BQ015182        | 1,01  | 7,06E-01 | 8,77E-01 |
| MLF2            | 1,01  | 7,05E-01 | 8,77E-01 |
| KCNK9           | 1,02  | 7,06E-01 | 8,77E-01 |
| A_24_P917971    | 1,02  | 7,06E-01 | 8,77E-01 |
| THC2365017      | -1,04 | 7,06E-01 | 8,77E-01 |
| OR5AK2          | -1,02 | 7,06E-01 | 8,78E-01 |
| AI874270        | -1,01 | 7,06E-01 | 8,78E-01 |

|                 |       |          |          |
|-----------------|-------|----------|----------|
| CYLC2           | -1,01 | 7,06E-01 | 8,78E-01 |
| BC017848        | -1,01 | 7,06E-01 | 8,78E-01 |
| THC2441771      | 1,01  | 7,06E-01 | 8,78E-01 |
| AY102069        | 1,01  | 7,06E-01 | 8,78E-01 |
| PRO2949         | 1,06  | 7,06E-01 | 8,78E-01 |
| A_24_P784213    | 1,02  | 7,06E-01 | 8,78E-01 |
| T35134          | 1,02  | 7,06E-01 | 8,78E-01 |
| AI685431        | -1,01 | 7,06E-01 | 8,78E-01 |
| PHC1            | -1,01 | 7,06E-01 | 8,78E-01 |
| LOC643659       | 1,01  | 7,06E-01 | 8,78E-01 |
| CSS3            | 1,05  | 7,06E-01 | 8,78E-01 |
| AJ009817        | -1,02 | 7,06E-01 | 8,78E-01 |
| C20orf116       | 1,02  | 7,06E-01 | 8,78E-01 |
| AK054895        | -1,03 | 7,06E-01 | 8,78E-01 |
| LCE3A           | -1,05 | 7,07E-01 | 8,78E-01 |
| ANGPT1          | -1,05 | 7,07E-01 | 8,78E-01 |
| THC2441767      | -1,03 | 7,07E-01 | 8,78E-01 |
| LASS6           | -1,03 | 7,07E-01 | 8,78E-01 |
| TSEN34          | -1,02 | 7,07E-01 | 8,78E-01 |
| BM666354        | -1,01 | 7,07E-01 | 8,78E-01 |
| TREML1          | -1,01 | 7,06E-01 | 8,78E-01 |
| SNW1            | 1,01  | 7,07E-01 | 8,78E-01 |
| AY358789        | 1,02  | 7,07E-01 | 8,78E-01 |
| LOC387895       | 1,02  | 7,07E-01 | 8,78E-01 |
| A_24_P635991    | 1,02  | 7,07E-01 | 8,78E-01 |
| CCL15           | -1,04 | 7,07E-01 | 8,78E-01 |
| LOC344382       | 1,02  | 7,07E-01 | 8,78E-01 |
| SP7             | 1,01  | 7,07E-01 | 8,78E-01 |
| THC2366854      | 1,01  | 7,07E-01 | 8,78E-01 |
| EGLN2           | 1,02  | 7,07E-01 | 8,78E-01 |
| HHLA1           | 1,02  | 7,07E-01 | 8,78E-01 |
| S73202          | 1,02  | 7,07E-01 | 8,78E-01 |
| CCDC38          | 1,05  | 7,07E-01 | 8,78E-01 |
| THC2268343      | -1,03 | 7,07E-01 | 8,78E-01 |
| AB055226        | -1,02 | 7,07E-01 | 8,78E-01 |
| FSIP2           | 1,02  | 7,07E-01 | 8,78E-01 |
| THC2409824      | 1,02  | 7,07E-01 | 8,78E-01 |
| YIPF7           | -1,01 | 7,08E-01 | 8,78E-01 |
| LOC346673       | 1,02  | 7,08E-01 | 8,78E-01 |
| SLC2A8          | -1,01 | 7,08E-01 | 8,78E-01 |
| SMPDL3A         | -1,07 | 7,08E-01 | 8,78E-01 |
| IER3IP1         | -1,02 | 7,08E-01 | 8,78E-01 |
| SPTA1           | -1,01 | 7,08E-01 | 8,78E-01 |
| ENST00000199389 | 1,02  | 7,08E-01 | 8,78E-01 |

|                        |       |          |          |
|------------------------|-------|----------|----------|
| <i>C1orf95</i>         | 1,02  | 7,08E-01 | 8,78E-01 |
| <i>ENST00000367573</i> | -1,01 | 7,08E-01 | 8,78E-01 |
| <i>A_24_P936618</i>    | 1,02  | 7,08E-01 | 8,79E-01 |
| <i>MORN2</i>           | 1,02  | 7,08E-01 | 8,79E-01 |
| <i>C2orf7</i>          | 1,02  | 7,08E-01 | 8,79E-01 |
| <i>LOC389748</i>       | -1,02 | 7,08E-01 | 8,79E-01 |
| <i>RPS20</i>           | -1,02 | 7,08E-01 | 8,79E-01 |
| <i>Z38565</i>          | -1,01 | 7,08E-01 | 8,79E-01 |
| <i>HEY1</i>            | 1,03  | 7,08E-01 | 8,79E-01 |
| <i>M27126</i>          | -1,06 | 7,08E-01 | 8,79E-01 |
| <i>THC2326033</i>      | 1,01  | 7,08E-01 | 8,79E-01 |
| <i>CLSTN3</i>          | 1,02  | 7,08E-01 | 8,79E-01 |
| <i>THC2285364</i>      | 1,02  | 7,08E-01 | 8,79E-01 |
| <i>THC2438207</i>      | 1,02  | 7,08E-01 | 8,79E-01 |
| <i>CCK</i>             | 1,03  | 7,08E-01 | 8,79E-01 |
| <i>DSU</i>             | -1,03 | 7,09E-01 | 8,79E-01 |
| <i>A_24_P483871</i>    | -1,02 | 7,09E-01 | 8,79E-01 |
| <i>CLEC4F</i>          | -1,02 | 7,08E-01 | 8,79E-01 |
| <i>S81579</i>          | -1,02 | 7,09E-01 | 8,79E-01 |
| <i>DKFZP547L112</i>    | -1,02 | 7,09E-01 | 8,79E-01 |
| <i>LGALS13</i>         | -1,02 | 7,09E-01 | 8,79E-01 |
| <i>C5orf22</i>         | -1,01 | 7,09E-01 | 8,79E-01 |
| <i>PTPN9</i>           | -1,01 | 7,09E-01 | 8,79E-01 |
| <i>OPRK1</i>           | 1,01  | 7,09E-01 | 8,79E-01 |
| <i>PCNXL3</i>          | 1,01  | 7,08E-01 | 8,79E-01 |
| <i>AI453629</i>        | 1,01  | 7,08E-01 | 8,79E-01 |
| <i>ENST00000330762</i> | 1,01  | 7,09E-01 | 8,79E-01 |
| <i>AKAP9</i>           | 1,02  | 7,09E-01 | 8,79E-01 |
| <i>CA427417</i>        | -1,01 | 7,09E-01 | 8,79E-01 |
| <i>A_24_P917519</i>    | 1,01  | 7,09E-01 | 8,79E-01 |
| <i>LUM</i>             | -1,04 | 7,09E-01 | 8,79E-01 |
| <i>AL832767</i>        | 1,01  | 7,09E-01 | 8,79E-01 |
| <i>SLC2A9</i>          | -1,01 | 7,09E-01 | 8,79E-01 |
| <i>AKAP8L</i>          | -1,02 | 7,09E-01 | 8,79E-01 |
| <i>NAT12</i>           | -1,01 | 7,09E-01 | 8,79E-01 |
| <i>LOC90379</i>        | 1,01  | 7,09E-01 | 8,79E-01 |
| <i>COL17A1</i>         | 1,05  | 7,09E-01 | 8,79E-01 |
| <i>TMED1</i>           | 1,01  | 7,10E-01 | 8,79E-01 |
| <i>EP400</i>           | 1,01  | 7,10E-01 | 8,79E-01 |
| <i>DNAJB8</i>          | 1,02  | 7,10E-01 | 8,79E-01 |
| <i>BC006216</i>        | 1,01  | 7,10E-01 | 8,80E-01 |
| <i>UBA2</i>            | 1,02  | 7,10E-01 | 8,80E-01 |
| <i>KCNH2</i>           | -1,07 | 7,10E-01 | 8,80E-01 |
| <i>IGF1</i>            | 1,05  | 7,10E-01 | 8,80E-01 |

|                        |       |          |          |
|------------------------|-------|----------|----------|
| <i>TMSL8</i>           | -1,05 | 7,10E-01 | 8,80E-01 |
| <i>AA004800</i>        | 1,01  | 7,10E-01 | 8,80E-01 |
| <i>SSX1</i>            | 1,02  | 7,10E-01 | 8,80E-01 |
| <i>ENTPD7</i>          | 1,02  | 7,10E-01 | 8,80E-01 |
| <i>DNAJC8</i>          | 1,01  | 7,11E-01 | 8,80E-01 |
| <i>ACVR1C</i>          | -1,05 | 7,11E-01 | 8,80E-01 |
| <i>TMEM45B</i>         | -1,06 | 7,11E-01 | 8,80E-01 |
| <i>LYPD2</i>           | -1,02 | 7,11E-01 | 8,80E-01 |
| <i>THC2309658</i>      | 1,01  | 7,11E-01 | 8,80E-01 |
| <i>PPY</i>             | 1,01  | 7,11E-01 | 8,80E-01 |
| <i>GRHL2</i>           | 1,03  | 7,11E-01 | 8,80E-01 |
| <i>A_32_P743731</i>    | -1,01 | 7,11E-01 | 8,80E-01 |
| <i>ATP6V0D1</i>        | -1,02 | 7,11E-01 | 8,80E-01 |
| <i>IL12A</i>           | 1,10  | 7,11E-01 | 8,80E-01 |
| <i>ENST00000321662</i> | 1,02  | 7,11E-01 | 8,80E-01 |
| <i>C20orf71</i>        | 1,02  | 7,11E-01 | 8,80E-01 |
| <i>SP110</i>           | 1,01  | 7,11E-01 | 8,80E-01 |
| <i>KCNA10</i>          | -1,02 | 7,11E-01 | 8,80E-01 |
| <i>DENND3</i>          | 1,02  | 7,11E-01 | 8,80E-01 |
| <i>THC2375415</i>      | -1,01 | 7,11E-01 | 8,81E-01 |
| <i>THC2407272</i>      | -1,01 | 7,11E-01 | 8,81E-01 |
| <i>S100A13</i>         | -1,02 | 7,11E-01 | 8,81E-01 |
| <i>AK057884</i>        | 1,03  | 7,11E-01 | 8,81E-01 |
| <i>ABTB2</i>           | 1,06  | 7,11E-01 | 8,81E-01 |
| <i>MEGF11</i>          | -1,01 | 7,11E-01 | 8,81E-01 |
| <i>CEL</i>             | -1,01 | 7,11E-01 | 8,81E-01 |
| <i>THC2397265</i>      | -1,03 | 7,12E-01 | 8,81E-01 |
| <i>DNAL4</i>           | 1,01  | 7,12E-01 | 8,81E-01 |
| <i>BC011136</i>        | 1,01  | 7,12E-01 | 8,81E-01 |
| <i>C9orf38</i>         | 1,02  | 7,12E-01 | 8,81E-01 |
| <i>THC2308299</i>      | -1,02 | 7,12E-01 | 8,81E-01 |
| <i>FLJ40176</i>        | -1,01 | 7,12E-01 | 8,81E-01 |
| <i>LTC4S</i>           | 1,03  | 7,12E-01 | 8,81E-01 |
| <i>LRRC14</i>          | -1,02 | 7,12E-01 | 8,81E-01 |
| <i>A1344752</i>        | -1,02 | 7,12E-01 | 8,81E-01 |
| <i>THC2314181</i>      | 1,02  | 7,12E-01 | 8,81E-01 |
| <i>STT3B</i>           | 1,02  | 7,12E-01 | 8,81E-01 |
| <i>ENST00000340381</i> | -1,03 | 7,12E-01 | 8,81E-01 |
| <i>MGC34824</i>        | 1,01  | 7,12E-01 | 8,81E-01 |
| <i>SLC27A4</i>         | 1,02  | 7,12E-01 | 8,81E-01 |
| <i>A_24_P33429</i>     | -1,06 | 7,12E-01 | 8,81E-01 |
| <i>FAH</i>             | 1,02  | 7,12E-01 | 8,81E-01 |
| <i>THC2296318</i>      | 1,01  | 7,12E-01 | 8,81E-01 |
| <i>BF312639</i>        | -1,03 | 7,13E-01 | 8,81E-01 |

|                        |       |          |          |
|------------------------|-------|----------|----------|
| <i>SHMT2</i>           | -1,02 | 7,13E-01 | 8,81E-01 |
| <i>BMP5</i>            | -1,02 | 7,13E-01 | 8,81E-01 |
| <i>A_23_P203613</i>    | -1,01 | 7,13E-01 | 8,81E-01 |
| <i>SAMM50</i>          | 1,01  | 7,13E-01 | 8,81E-01 |
| <i>AA928786</i>        | 1,01  | 7,13E-01 | 8,81E-01 |
| <i>A_24_P915079</i>    | 1,02  | 7,13E-01 | 8,81E-01 |
| <i>KLHL10</i>          | 1,02  | 7,13E-01 | 8,81E-01 |
| <i>KIAA1189</i>        | 1,02  | 7,13E-01 | 8,81E-01 |
| <i>ENST00000234668</i> | 1,03  | 7,13E-01 | 8,81E-01 |
| <i>SHOC2</i>           | -1,02 | 7,13E-01 | 8,81E-01 |
| <i>A_24_P593724</i>    | -1,01 | 7,13E-01 | 8,81E-01 |
| <i>A_24_P926462</i>    | -1,01 | 7,13E-01 | 8,81E-01 |
| <i>PPAPDC3</i>         | 1,02  | 7,13E-01 | 8,81E-01 |
| <i>RCN3</i>            | -1,05 | 7,13E-01 | 8,81E-01 |
| <i>BF207040</i>        | -1,04 | 7,13E-01 | 8,81E-01 |
| <i>BQ066852</i>        | -1,01 | 7,13E-01 | 8,81E-01 |
| <i>BQ015140</i>        | 1,01  | 7,13E-01 | 8,81E-01 |
| <i>BTNL2</i>           | 1,01  | 7,13E-01 | 8,81E-01 |
| <i>AF116684</i>        | 1,04  | 7,13E-01 | 8,81E-01 |
| <i>KCNC1</i>           | 1,15  | 7,13E-01 | 8,81E-01 |
| <i>FLJ25404</i>        | -1,02 | 7,13E-01 | 8,81E-01 |
| <i>RP11-48416.3</i>    | -1,02 | 7,13E-01 | 8,81E-01 |
| <i>C10orf104</i>       | -1,01 | 7,13E-01 | 8,81E-01 |
| <i>HFE</i>             | -1,02 | 7,13E-01 | 8,82E-01 |
| <i>PNPLA6</i>          | 1,01  | 7,14E-01 | 8,82E-01 |
| <i>C1orf157</i>        | 1,01  | 7,14E-01 | 8,82E-01 |
| <i>ARNTL</i>           | -1,05 | 7,14E-01 | 8,82E-01 |
| <i>AK093691</i>        | -1,02 | 7,14E-01 | 8,82E-01 |
| <i>FLJ35848</i>        | 1,02  | 7,14E-01 | 8,82E-01 |
| <i>C9orf14</i>         | 1,02  | 7,14E-01 | 8,82E-01 |
| <i>TRPV6</i>           | 1,03  | 7,14E-01 | 8,82E-01 |
| <i>A_24_P393065</i>    | 1,01  | 7,14E-01 | 8,82E-01 |
| <i>A_24_P289884</i>    | -1,02 | 7,14E-01 | 8,82E-01 |
| <i>A_32_P17882</i>     | -1,01 | 7,14E-01 | 8,82E-01 |
| <i>STOML3</i>          | 1,02  | 7,14E-01 | 8,82E-01 |
| <i>A_24_P558034</i>    | -1,03 | 7,14E-01 | 8,82E-01 |
| <i>CR2</i>             | -1,02 | 7,14E-01 | 8,82E-01 |
| <i>TP53RK</i>          | -1,01 | 7,14E-01 | 8,82E-01 |
| <i>KCNC2</i>           | -1,01 | 7,14E-01 | 8,82E-01 |
| <i>C8orf45</i>         | 1,01  | 7,14E-01 | 8,82E-01 |
| <i>A_24_P931903</i>    | 1,02  | 7,14E-01 | 8,82E-01 |
| <i>A_32_P78488</i>     | 1,02  | 7,14E-01 | 8,82E-01 |
| <i>C3orf57</i>         | 1,02  | 7,14E-01 | 8,82E-01 |
| <i>SLC35B1</i>         | 1,02  | 7,14E-01 | 8,82E-01 |

|                 |       |          |          |
|-----------------|-------|----------|----------|
| CA420688        | 1,03  | 7,14E-01 | 8,82E-01 |
| THC2435089      | 1,02  | 7,14E-01 | 8,82E-01 |
| PELI3           | 1,03  | 7,14E-01 | 8,82E-01 |
| QSCN6L1         | -1,01 | 7,15E-01 | 8,82E-01 |
| SLC22A16        | 1,01  | 7,15E-01 | 8,82E-01 |
| DSC2            | 1,09  | 7,15E-01 | 8,82E-01 |
| A_24_P118512    | -1,02 | 7,15E-01 | 8,82E-01 |
| THC2407545      | 1,02  | 7,15E-01 | 8,82E-01 |
| RIMS3           | 1,03  | 7,15E-01 | 8,82E-01 |
| CEECAM1         | 1,04  | 7,15E-01 | 8,82E-01 |
| SCN10A          | -1,02 | 7,15E-01 | 8,82E-01 |
| NALP8           | -1,01 | 7,15E-01 | 8,82E-01 |
| ATP13A4         | 1,01  | 7,15E-01 | 8,82E-01 |
| CCR10           | 1,02  | 7,15E-01 | 8,82E-01 |
| HRC             | 1,04  | 7,15E-01 | 8,82E-01 |
| RAB33B          | -1,03 | 7,15E-01 | 8,82E-01 |
| C3orf17         | -1,01 | 7,15E-01 | 8,82E-01 |
| AI093077        | 1,02  | 7,15E-01 | 8,82E-01 |
| BE825944        | 1,02  | 7,15E-01 | 8,82E-01 |
| WNT11           | 1,03  | 7,15E-01 | 8,82E-01 |
| TEAD3           | -1,02 | 7,15E-01 | 8,82E-01 |
| A_24_P685691    | 1,02  | 7,15E-01 | 8,82E-01 |
| THC2282095      | 1,01  | 7,15E-01 | 8,82E-01 |
| CPLX4           | 1,02  | 7,15E-01 | 8,82E-01 |
| AK123150        | -1,02 | 7,15E-01 | 8,82E-01 |
| AL133090        | 1,04  | 7,15E-01 | 8,82E-01 |
| A_24_P930162    | 1,01  | 7,15E-01 | 8,82E-01 |
| BQ323779        | -1,02 | 7,16E-01 | 8,82E-01 |
| WDR72           | -1,03 | 7,16E-01 | 8,83E-01 |
| A_23_P130639    | 1,02  | 7,16E-01 | 8,83E-01 |
| KIAA1602        | -1,01 | 7,16E-01 | 8,83E-01 |
| C9orf53         | -1,05 | 7,16E-01 | 8,83E-01 |
| ERMAP           | -1,03 | 7,16E-01 | 8,83E-01 |
| OR10H2          | -1,02 | 7,16E-01 | 8,83E-01 |
| LMAN2           | -1,02 | 7,16E-01 | 8,83E-01 |
| ZNRF4           | -1,01 | 7,16E-01 | 8,83E-01 |
| THC2320570      | -1,01 | 7,16E-01 | 8,83E-01 |
| THC2433712      | -1,01 | 7,16E-01 | 8,83E-01 |
| A_24_P67765     | -1,01 | 7,16E-01 | 8,83E-01 |
| PMPCA           | 1,01  | 7,16E-01 | 8,83E-01 |
| C18orf22        | 1,01  | 7,16E-01 | 8,83E-01 |
| THC2433217      | 1,01  | 7,16E-01 | 8,83E-01 |
| ENST00000305973 | 1,01  | 7,16E-01 | 8,83E-01 |
| AK024110        | 1,01  | 7,16E-01 | 8,83E-01 |

|                        |       |          |          |
|------------------------|-------|----------|----------|
| <i>C10orf54</i>        | 1,02  | 7,16E-01 | 8,83E-01 |
| <i>THC2407386</i>      | 1,02  | 7,16E-01 | 8,83E-01 |
| <i>ZNF37A</i>          | 1,02  | 7,16E-01 | 8,83E-01 |
| <i>ACY1</i>            | 1,02  | 7,16E-01 | 8,83E-01 |
| <i>SOAT2</i>           | 1,02  | 7,16E-01 | 8,83E-01 |
| <i>A_24_P418744</i>    | 1,02  | 7,16E-01 | 8,83E-01 |
| <i>FLJ45422</i>        | 1,03  | 7,16E-01 | 8,83E-01 |
| <i>BE835321</i>        | 1,03  | 7,16E-01 | 8,83E-01 |
| <i>LPL</i>             | 1,05  | 7,16E-01 | 8,83E-01 |
| <i>A_23_P72583</i>     | 1,02  | 7,17E-01 | 8,83E-01 |
| <i>ENST00000377479</i> | -1,05 | 7,17E-01 | 8,83E-01 |
| <i>UCRC</i>            | -1,02 | 7,17E-01 | 8,83E-01 |
| <i>AK096082</i>        | -1,02 | 7,17E-01 | 8,83E-01 |
| <i>FBXO4</i>           | -1,02 | 7,17E-01 | 8,83E-01 |
| <i>PLA2G4A</i>         | -1,02 | 7,17E-01 | 8,83E-01 |
| <i>ENST00000338637</i> | -1,01 | 7,17E-01 | 8,83E-01 |
| <i>DGAT1</i>           | 1,02  | 7,17E-01 | 8,83E-01 |
| <i>CLEC4E</i>          | -1,02 | 7,17E-01 | 8,83E-01 |
| <i>AI143493</i>        | -1,01 | 7,17E-01 | 8,83E-01 |
| <i>A_23_P250842</i>    | -1,01 | 7,17E-01 | 8,83E-01 |
| <i>U92817</i>          | -1,01 | 7,17E-01 | 8,83E-01 |
| <i>ZFPL1</i>           | 1,01  | 7,17E-01 | 8,83E-01 |
| <i>GALNT6</i>          | 1,02  | 7,17E-01 | 8,83E-01 |
| <i>ENST00000339991</i> | 1,02  | 7,17E-01 | 8,83E-01 |
| <i>A_24_P401321</i>    | 1,03  | 7,17E-01 | 8,83E-01 |
| <i>IFI6</i>            | 1,04  | 7,17E-01 | 8,83E-01 |
| <i>CDH23</i>           | -1,02 | 7,17E-01 | 8,83E-01 |
| <i>NP086111</i>        | -1,02 | 7,17E-01 | 8,83E-01 |
| <i>IFT57</i>           | -1,02 | 7,17E-01 | 8,83E-01 |
| <i>TMEM14C</i>         | -1,01 | 7,17E-01 | 8,83E-01 |
| <i>Z73903</i>          | -1,01 | 7,17E-01 | 8,83E-01 |
| <i>LOC128977</i>       | 1,01  | 7,17E-01 | 8,83E-01 |
| <i>ACBD3</i>           | 1,02  | 7,17E-01 | 8,83E-01 |
| <i>BF956667</i>        | 1,02  | 7,17E-01 | 8,83E-01 |
| <i>A_32_P162958</i>    | 1,02  | 7,17E-01 | 8,83E-01 |
| <i>AJ227863</i>        | 1,03  | 7,17E-01 | 8,83E-01 |
| <i>SCAMPER</i>         | -1,01 | 7,18E-01 | 8,83E-01 |
| <i>MGC51025</i>        | 1,01  | 7,18E-01 | 8,83E-01 |
| <i>A_24_P523325</i>    | -1,01 | 7,18E-01 | 8,83E-01 |
| <i>A_24_P840868</i>    | 1,02  | 7,18E-01 | 8,83E-01 |
| <i>A_32_P172298</i>    | 1,01  | 7,18E-01 | 8,83E-01 |
| <i>THC2307332</i>      | 1,02  | 7,18E-01 | 8,83E-01 |
| <i>RYK</i>             | 1,02  | 7,18E-01 | 8,83E-01 |
| <i>FLJ36144</i>        | -1,01 | 7,18E-01 | 8,83E-01 |

|                        |       |          |          |
|------------------------|-------|----------|----------|
| <i>FLJ31715</i>        | -1,01 | 7,18E-01 | 8,83E-01 |
| <i>ABO11149</i>        | -1,01 | 7,18E-01 | 8,83E-01 |
| <i>A_24_P791862</i>    | -1,02 | 7,18E-01 | 8,83E-01 |
| <i>A_24_P539080</i>    | 1,01  | 7,18E-01 | 8,83E-01 |
| <i>ENST00000244249</i> | 1,04  | 7,18E-01 | 8,83E-01 |
| <i>LRRC41</i>          | 1,01  | 7,18E-01 | 8,83E-01 |
| <i>MRPS23</i>          | 1,01  | 7,18E-01 | 8,83E-01 |
| <i>BE080604</i>        | 1,01  | 7,18E-01 | 8,83E-01 |
| <i>A_24_P919717</i>    | 1,02  | 7,18E-01 | 8,83E-01 |
| <i>ENST00000335052</i> | 1,03  | 7,18E-01 | 8,83E-01 |
| <i>PGAM2</i>           | 1,03  | 7,18E-01 | 8,83E-01 |
| <i>AL109784</i>        | -1,02 | 7,18E-01 | 8,83E-01 |
| <i>THC2411839</i>      | -1,02 | 7,18E-01 | 8,84E-01 |
| <i>DHX57</i>           | 1,01  | 7,19E-01 | 8,84E-01 |
| <i>WDSUB1</i>          | -1,02 | 7,19E-01 | 8,84E-01 |
| <i>BC034282</i>        | -1,01 | 7,19E-01 | 8,84E-01 |
| <i>CA424270</i>        | 1,01  | 7,19E-01 | 8,84E-01 |
| <i>AA878126</i>        | -1,02 | 7,19E-01 | 8,84E-01 |
| <i>ENST00000381140</i> | 1,01  | 7,19E-01 | 8,84E-01 |
| <i>NUPL1</i>           | 1,01  | 7,19E-01 | 8,84E-01 |
| <i>MAPK11</i>          | -1,02 | 7,19E-01 | 8,84E-01 |
| <i>ZIK1</i>            | -1,02 | 7,19E-01 | 8,84E-01 |
| <i>IMPA1</i>           | 1,02  | 7,19E-01 | 8,84E-01 |
| <i>THC2363226</i>      | 1,01  | 7,19E-01 | 8,84E-01 |
| <i>DFFB</i>            | -1,12 | 7,19E-01 | 8,84E-01 |
| <i>AA639753</i>        | 1,05  | 7,19E-01 | 8,84E-01 |
| <i>SMCY</i>            | 1,01  | 7,20E-01 | 8,84E-01 |
| <i>HTR2C</i>           | 1,05  | 7,20E-01 | 8,84E-01 |
| <i>A_32_P42842</i>     | -1,02 | 7,20E-01 | 8,85E-01 |
| <i>MGC71993</i>        | -1,01 | 7,20E-01 | 8,85E-01 |
| <i>FLJ11259</i>        | -1,02 | 7,20E-01 | 8,85E-01 |
| <i>LGALS12</i>         | -1,01 | 7,20E-01 | 8,85E-01 |
| <i>DEDD2</i>           | -1,01 | 7,20E-01 | 8,85E-01 |
| <i>SMARCB1</i>         | -1,01 | 7,20E-01 | 8,85E-01 |
| <i>THC2415979</i>      | 1,01  | 7,20E-01 | 8,85E-01 |
| <i>BC016291</i>        | 1,02  | 7,20E-01 | 8,85E-01 |
| <i>AA868651</i>        | 1,01  | 7,20E-01 | 8,85E-01 |
| <i>EHD1</i>            | -1,02 | 7,20E-01 | 8,85E-01 |
| <i>BX094246</i>        | -1,02 | 7,20E-01 | 8,85E-01 |
| <i>CAMK2N2</i>         | -1,01 | 7,20E-01 | 8,85E-01 |
| <i>ENST00000319327</i> | 1,02  | 7,20E-01 | 8,85E-01 |
| <i>KA36</i>            | 1,01  | 7,20E-01 | 8,85E-01 |
| <i>THC2343242</i>      | 1,02  | 7,20E-01 | 8,85E-01 |
| <i>ENST00000320876</i> | 1,02  | 7,20E-01 | 8,85E-01 |



|                        |       |          |          |
|------------------------|-------|----------|----------|
| <i>TPD52</i>           | 1,03  | 7,21E-01 | 8,85E-01 |
| <i>RHOD</i>            | -1,02 | 7,21E-01 | 8,85E-01 |
| <i>DDX41</i>           | -1,02 | 7,21E-01 | 8,85E-01 |
| <i>SIRPD</i>           | -1,01 | 7,21E-01 | 8,85E-01 |
| <i>DKFZP4340047</i>    | 1,01  | 7,21E-01 | 8,85E-01 |
| <i>A_24_P272503</i>    | 1,01  | 7,21E-01 | 8,85E-01 |
| <i>C14orf39</i>        | 1,02  | 7,21E-01 | 8,85E-01 |
| <i>CST5</i>            | 1,02  | 7,21E-01 | 8,85E-01 |
| <i>TPD52L2</i>         | 1,02  | 7,21E-01 | 8,85E-01 |
| <i>ZPBP2</i>           | 1,04  | 7,21E-01 | 8,85E-01 |
| <i>PXK</i>             | 1,03  | 7,21E-01 | 8,85E-01 |
| <i>CALCA</i>           | 1,01  | 7,21E-01 | 8,85E-01 |
| <i>CTBS</i>            | -1,01 | 7,21E-01 | 8,85E-01 |
| <i>CRYGD</i>           | -1,01 | 7,21E-01 | 8,85E-01 |
| <i>RP11-54H7.1</i>     | -1,03 | 7,21E-01 | 8,85E-01 |
| <i>BC040303</i>        | -1,02 | 7,21E-01 | 8,85E-01 |
| <i>TCF7L2</i>          | -1,02 | 7,21E-01 | 8,85E-01 |
| <i>SLC25A24</i>        | -1,02 | 7,21E-01 | 8,85E-01 |
| <i>GPR172B</i>         | 1,03  | 7,21E-01 | 8,85E-01 |
| <i>AK131430</i>        | -1,02 | 7,21E-01 | 8,85E-01 |
| <i>ENST00000368426</i> | 1,01  | 7,21E-01 | 8,85E-01 |
| <i>A_24_P367397</i>    | 1,02  | 7,21E-01 | 8,85E-01 |
| <i>PCP4</i>            | -1,10 | 7,22E-01 | 8,85E-01 |
| <i>FOXP2</i>           | -1,03 | 7,22E-01 | 8,85E-01 |
| <i>ADCK1</i>           | -1,01 | 7,22E-01 | 8,85E-01 |
| <i>FLJ38020</i>        | 1,02  | 7,22E-01 | 8,85E-01 |
| <i>IQCC</i>            | -1,10 | 7,22E-01 | 8,86E-01 |
| <i>ENST00000314295</i> | -1,01 | 7,22E-01 | 8,86E-01 |
| <i>AI720033</i>        | -1,01 | 7,22E-01 | 8,86E-01 |
| <i>ENST00000370363</i> | -1,02 | 7,22E-01 | 8,86E-01 |
| <i>TMPRSS11A</i>       | -1,07 | 7,22E-01 | 8,86E-01 |
| <i>ENST00000319373</i> | 1,01  | 7,22E-01 | 8,86E-01 |
| <i>ARF4</i>            | -1,03 | 7,22E-01 | 8,86E-01 |
| <i>BX537816</i>        | -1,02 | 7,22E-01 | 8,86E-01 |
| <i>CKAP2</i>           | -1,02 | 7,22E-01 | 8,86E-01 |
| <i>NXF2</i>            | -1,02 | 7,22E-01 | 8,86E-01 |
| <i>WDR78</i>           | -1,01 | 7,22E-01 | 8,86E-01 |
| <i>GSK3A</i>           | 1,01  | 7,22E-01 | 8,86E-01 |
| <i>SDC3</i>            | -1,03 | 7,22E-01 | 8,86E-01 |
| <i>MNS1</i>            | -1,01 | 7,22E-01 | 8,86E-01 |
| <i>A_24_P685729</i>    | -1,06 | 7,22E-01 | 8,86E-01 |
| <i>ENST00000262795</i> | 1,03  | 7,23E-01 | 8,86E-01 |
| <i>THC2403568</i>      | 1,01  | 7,23E-01 | 8,86E-01 |
| <i>UBXD8</i>           | 1,01  | 7,23E-01 | 8,86E-01 |

|                        |       |          |          |
|------------------------|-------|----------|----------|
| <i>MGC50559</i>        | -1,03 | 7,23E-01 | 8,86E-01 |
| <i>AY227436</i>        | 1,01  | 7,23E-01 | 8,86E-01 |
| <i>SNRPF</i>           | -1,02 | 7,23E-01 | 8,86E-01 |
| <i>AY142148</i>        | 1,01  | 7,23E-01 | 8,86E-01 |
| <i>POLD4</i>           | 1,01  | 7,23E-01 | 8,86E-01 |
| <i>THC2302452</i>      | 1,02  | 7,23E-01 | 8,86E-01 |
| <i>THC2355348</i>      | -1,02 | 7,23E-01 | 8,86E-01 |
| <i>TNFSF4</i>          | -1,02 | 7,23E-01 | 8,86E-01 |
| <i>AK095167</i>        | -1,02 | 7,23E-01 | 8,86E-01 |
| <i>THC2376828</i>      | -1,02 | 7,23E-01 | 8,86E-01 |
| <i>ENST00000378204</i> | 1,01  | 7,23E-01 | 8,86E-01 |
| <i>XKRX</i>            | 1,02  | 7,23E-01 | 8,86E-01 |
| <i>A_24_P84970</i>     | 1,02  | 7,23E-01 | 8,86E-01 |
| <i>AU148142</i>        | -1,01 | 7,23E-01 | 8,86E-01 |
| <i>NGFB</i>            | 1,02  | 7,23E-01 | 8,86E-01 |
| <i>HELLS</i>           | 1,02  | 7,23E-01 | 8,86E-01 |
| <i>SWS1</i>            | -1,02 | 7,23E-01 | 8,86E-01 |
| <i>CYP2S1</i>          | -1,02 | 7,23E-01 | 8,86E-01 |
| <i>A_24_P925996</i>    | 1,01  | 7,23E-01 | 8,86E-01 |
| <i>C17orf79</i>        | -1,02 | 7,23E-01 | 8,86E-01 |
| <i>HADHB</i>           | -1,01 | 7,23E-01 | 8,86E-01 |
| <i>SRD5A2</i>          | 1,10  | 7,24E-01 | 8,86E-01 |
| <i>THSD4</i>           | -1,04 | 7,24E-01 | 8,86E-01 |
| <i>AF181286</i>        | -1,01 | 7,24E-01 | 8,86E-01 |
| <i>BC021996</i>        | 1,01  | 7,24E-01 | 8,86E-01 |
| <i>THC2315706</i>      | 1,01  | 7,24E-01 | 8,86E-01 |
| <i>EIF4EBP2</i>        | 1,02  | 7,24E-01 | 8,86E-01 |
| <i>PRO2266</i>         | 1,02  | 7,24E-01 | 8,86E-01 |
| <i>TCF2</i>            | 1,01  | 7,24E-01 | 8,86E-01 |
| <i>EIF2C1</i>          | 1,01  | 7,24E-01 | 8,86E-01 |
| <i>TMEM14B</i>         | 1,01  | 7,24E-01 | 8,86E-01 |
| <i>TMEM105</i>         | 1,02  | 7,24E-01 | 8,86E-01 |
| <i>THC2281244</i>      | -1,02 | 7,24E-01 | 8,86E-01 |
| <i>D26528</i>          | -1,01 | 7,24E-01 | 8,87E-01 |
| <i>ERCC4</i>           | 1,02  | 7,24E-01 | 8,87E-01 |
| <i>C15orf37</i>        | 1,01  | 7,24E-01 | 8,87E-01 |
| <i>RP3-355C18.2</i>    | 1,01  | 7,24E-01 | 8,87E-01 |
| <i>C10orf110</i>       | 1,02  | 7,24E-01 | 8,87E-01 |
| <i>RLN1</i>            | 1,02  | 7,24E-01 | 8,87E-01 |
| <i>BX107899</i>        | -1,07 | 7,24E-01 | 8,87E-01 |
| <i>A_24_P341006</i>    | -1,04 | 7,24E-01 | 8,87E-01 |
| <i>AGER</i>            | -1,01 | 7,25E-01 | 8,87E-01 |
| <i>C12orf30</i>        | 1,01  | 7,25E-01 | 8,87E-01 |
| <i>NDUFAB1</i>         | 1,01  | 7,25E-01 | 8,87E-01 |

|                        |       |          |          |
|------------------------|-------|----------|----------|
| <i>ABCA7</i>           | 1,02  | 7,25E-01 | 8,87E-01 |
| <i>CN272797</i>        | -1,02 | 7,25E-01 | 8,87E-01 |
| <i>SLC27A1</i>         | -1,01 | 7,25E-01 | 8,87E-01 |
| <i>GAA</i>             | 1,03  | 7,25E-01 | 8,87E-01 |
| <i>C6orf160</i>        | 1,03  | 7,25E-01 | 8,87E-01 |
| <i>A_24_P538119</i>    | -1,01 | 7,25E-01 | 8,87E-01 |
| <i>SLC6A13</i>         | -1,01 | 7,25E-01 | 8,87E-01 |
| <i>LOC440040</i>       | -1,01 | 7,25E-01 | 8,87E-01 |
| <i>GPT</i>             | 1,04  | 7,25E-01 | 8,87E-01 |
| <i>FAM122B</i>         | -1,01 | 7,25E-01 | 8,87E-01 |
| <i>A_32_P67223</i>     | 1,02  | 7,25E-01 | 8,87E-01 |
| <i>GKAP1</i>           | 1,02  | 7,25E-01 | 8,87E-01 |
| <i>BC021741</i>        | -1,04 | 7,25E-01 | 8,87E-01 |
| <i>CYB561</i>          | -1,03 | 7,25E-01 | 8,87E-01 |
| <i>A_32_P4475</i>      | -1,01 | 7,25E-01 | 8,87E-01 |
| <i>ACADVL</i>          | -1,02 | 7,25E-01 | 8,87E-01 |
| <i>FARSLA</i>          | -1,01 | 7,25E-01 | 8,87E-01 |
| <i>MYO18B</i>          | 1,01  | 7,25E-01 | 8,87E-01 |
| <i>FGF3</i>            | 1,02  | 7,25E-01 | 8,87E-01 |
| <i>CR596233</i>        | 1,03  | 7,25E-01 | 8,87E-01 |
| <i>DUSP19</i>          | -1,02 | 7,26E-01 | 8,87E-01 |
| <i>IMPACT</i>          | -1,02 | 7,26E-01 | 8,87E-01 |
| <i>ARHGAP19</i>        | 1,01  | 7,26E-01 | 8,87E-01 |
| <i>AL549236</i>        | 1,02  | 7,26E-01 | 8,87E-01 |
| <i>HBD</i>             | 1,11  | 7,26E-01 | 8,87E-01 |
| <i>THC2290313</i>      | -1,02 | 7,26E-01 | 8,87E-01 |
| <i>CLU</i>             | -1,02 | 7,26E-01 | 8,87E-01 |
| <i>ENST00000280606</i> | 1,02  | 7,26E-01 | 8,87E-01 |
| <i>ZNF75A</i>          | 1,01  | 7,26E-01 | 8,87E-01 |
| <i>ACOT2</i>           | -1,04 | 7,26E-01 | 8,88E-01 |
| <i>C6orf123</i>        | -1,02 | 7,26E-01 | 8,88E-01 |
| <i>LOC441079</i>       | -1,01 | 7,26E-01 | 8,88E-01 |
| <i>NP1172593</i>       | -1,01 | 7,26E-01 | 8,88E-01 |
| <i>SERPINB12</i>       | 1,01  | 7,26E-01 | 8,88E-01 |
| <i>A_24_P7510</i>      | 1,01  | 7,26E-01 | 8,88E-01 |
| <i>A_24_P937084</i>    | 1,02  | 7,26E-01 | 8,88E-01 |
| <i>A_32_P6841</i>      | 1,02  | 7,26E-01 | 8,88E-01 |
| <i>ZFP36L1</i>         | -1,03 | 7,26E-01 | 8,88E-01 |
| <i>Y15200</i>          | -1,02 | 7,26E-01 | 8,88E-01 |
| <i>PRAMEF8</i>         | -1,01 | 7,26E-01 | 8,88E-01 |
| <i>AF090892</i>        | -1,01 | 7,26E-01 | 8,88E-01 |
| <i>LOC643431</i>       | 1,01  | 7,26E-01 | 8,88E-01 |
| <i>A_24_P924118</i>    | -1,01 | 7,26E-01 | 8,88E-01 |
| <i>ENST00000370323</i> | -1,02 | 7,27E-01 | 8,88E-01 |

|                        |       |          |          |
|------------------------|-------|----------|----------|
| <i>ANLN</i>            | -1,02 | 7,27E-01 | 8,88E-01 |
| <i>MMP21</i>           | -1,02 | 7,27E-01 | 8,88E-01 |
| <i>PPP1R3F</i>         | 1,01  | 7,27E-01 | 8,88E-01 |
| <i>ASB11</i>           | 1,02  | 7,27E-01 | 8,88E-01 |
| <i>RNF103</i>          | -1,02 | 7,27E-01 | 8,88E-01 |
| <i>THC2425829</i>      | 1,04  | 7,27E-01 | 8,88E-01 |
| <i>AK125099</i>        | -1,02 | 7,27E-01 | 8,88E-01 |
| <i>A_24_P715029</i>    | -1,01 | 7,27E-01 | 8,88E-01 |
| <i>THC2378449</i>      | -1,01 | 7,27E-01 | 8,88E-01 |
| <i>QRICH2</i>          | 1,01  | 7,27E-01 | 8,88E-01 |
| <i>AK021751</i>        | 1,02  | 7,27E-01 | 8,88E-01 |
| <i>A_24_P941847</i>    | -1,01 | 7,27E-01 | 8,88E-01 |
| <i>PHACTR4</i>         | -1,01 | 7,27E-01 | 8,88E-01 |
| <i>A_24_P392947</i>    | 1,04  | 7,27E-01 | 8,88E-01 |
| <i>A_24_P401381</i>    | -1,02 | 7,27E-01 | 8,88E-01 |
| <i>STX7</i>            | -1,01 | 7,27E-01 | 8,88E-01 |
| <i>VPS72</i>           | -1,01 | 7,27E-01 | 8,88E-01 |
| <i>ENST00000327788</i> | 1,01  | 7,27E-01 | 8,88E-01 |
| <i>REEP1</i>           | 1,04  | 7,27E-01 | 8,88E-01 |
| <i>VWA1</i>            | 1,05  | 7,27E-01 | 8,88E-01 |
| <i>BC036619</i>        | -1,01 | 7,27E-01 | 8,88E-01 |
| <i>ICEBERG</i>         | -1,03 | 7,28E-01 | 8,88E-01 |
| <i>PRDM5</i>           | -1,02 | 7,28E-01 | 8,88E-01 |
| <i>THC2341688</i>      | -1,02 | 7,28E-01 | 8,88E-01 |
| <i>A_24_P929407</i>    | 1,02  | 7,28E-01 | 8,88E-01 |
| <i>SCGB3A2</i>         | 1,02  | 7,28E-01 | 8,88E-01 |
| <i>CTSS</i>            | 1,02  | 7,28E-01 | 8,88E-01 |
| <i>C6orf105</i>        | 1,05  | 7,27E-01 | 8,88E-01 |
| <i>A_24_P918454</i>    | -1,01 | 7,28E-01 | 8,88E-01 |
| <i>A_32_P132337</i>    | -1,02 | 7,28E-01 | 8,88E-01 |
| <i>ZNF707</i>          | 1,01  | 7,28E-01 | 8,88E-01 |
| <i>THC2375890</i>      | 1,02  | 7,28E-01 | 8,88E-01 |
| <i>EML3</i>            | -1,02 | 7,28E-01 | 8,88E-01 |
| <i>A_24_P935864</i>    | -1,02 | 7,28E-01 | 8,88E-01 |
| <i>ARFIP2</i>          | 1,02  | 7,28E-01 | 8,88E-01 |
| <i>SDK1</i>            | 1,05  | 7,28E-01 | 8,88E-01 |
| <i>FAM60A</i>          | -1,02 | 7,28E-01 | 8,88E-01 |
| <i>ERAF</i>            | 1,02  | 7,28E-01 | 8,88E-01 |
| <i>U05597</i>          | 1,01  | 7,28E-01 | 8,88E-01 |
| <i>BI003432</i>        | -1,01 | 7,28E-01 | 8,88E-01 |
| <i>GMPPB</i>           | -1,02 | 7,28E-01 | 8,88E-01 |
| <i>HAS3</i>            | -1,02 | 7,28E-01 | 8,88E-01 |
| <i>AU146514</i>        | -1,01 | 7,28E-01 | 8,88E-01 |
| <i>PURG</i>            | -1,02 | 7,28E-01 | 8,88E-01 |

|                        |       |          |          |
|------------------------|-------|----------|----------|
| <i>A_23_P215382</i>    | -1,02 | 7,28E-01 | 8,88E-01 |
| <i>A_32_P18493</i>     | -1,01 | 7,28E-01 | 8,88E-01 |
| <i>AK026131</i>        | 1,01  | 7,28E-01 | 8,88E-01 |
| <i>A_24_P940820</i>    | 1,02  | 7,28E-01 | 8,88E-01 |
| <i>AF086464</i>        | -1,02 | 7,29E-01 | 8,88E-01 |
| <i>SLC2A4RG</i>        | -1,01 | 7,29E-01 | 8,88E-01 |
| <i>BXDC5</i>           | -1,01 | 7,29E-01 | 8,88E-01 |
| <i>CAPN5</i>           | 1,01  | 7,29E-01 | 8,88E-01 |
| <i>AY014273</i>        | 1,01  | 7,29E-01 | 8,89E-01 |
| <i>CSMD1</i>           | 1,10  | 7,29E-01 | 8,89E-01 |
| <i>THC2340177</i>      | 1,01  | 7,29E-01 | 8,89E-01 |
| <i>AK025047</i>        | -1,01 | 7,29E-01 | 8,89E-01 |
| <i>CB338058</i>        | -1,01 | 7,29E-01 | 8,89E-01 |
| <i>A_24_P900555</i>    | 1,02  | 7,29E-01 | 8,89E-01 |
| <i>AV714556</i>        | -1,02 | 7,29E-01 | 8,89E-01 |
| <i>ARID3A</i>          | 1,02  | 7,29E-01 | 8,89E-01 |
| <i>KLK12</i>           | -1,14 | 7,29E-01 | 8,89E-01 |
| <i>LIPE</i>            | -1,03 | 7,29E-01 | 8,89E-01 |
| <i>IFIT5</i>           | -1,01 | 7,29E-01 | 8,89E-01 |
| <i>A_24_P935647</i>    | -1,01 | 7,29E-01 | 8,89E-01 |
| <i>GPR109A</i>         | 1,01  | 7,29E-01 | 8,89E-01 |
| <i>TBC1D16</i>         | 1,01  | 7,29E-01 | 8,89E-01 |
| <i>PRKACG</i>          | 1,01  | 7,29E-01 | 8,89E-01 |
| <i>RICTOR</i>          | -1,01 | 7,29E-01 | 8,89E-01 |
| <i>OR10H1</i>          | -1,01 | 7,30E-01 | 8,89E-01 |
| <i>A_24_P724321</i>    | 1,01  | 7,30E-01 | 8,89E-01 |
| <i>A_23_P45902</i>     | -1,02 | 7,30E-01 | 8,89E-01 |
| <i>PBK</i>             | -1,03 | 7,30E-01 | 8,89E-01 |
| <i>LASS3</i>           | -1,04 | 7,30E-01 | 8,89E-01 |
| <i>DCT</i>             | 1,01  | 7,30E-01 | 8,89E-01 |
| <i>ENST00000379019</i> | 1,01  | 7,30E-01 | 8,89E-01 |
| <i>THC2376217</i>      | 1,03  | 7,30E-01 | 8,89E-01 |
| <i>PMM2</i>            | -1,02 | 7,30E-01 | 8,89E-01 |
| <i>THC2294545</i>      | -1,01 | 7,30E-01 | 8,89E-01 |
| <i>A_32_P24431</i>     | -1,01 | 7,30E-01 | 8,89E-01 |
| <i>KIF13B</i>          | 1,02  | 7,30E-01 | 8,89E-01 |
| <i>MGC5566</i>         | -1,02 | 7,30E-01 | 8,89E-01 |
| <i>THC2375545</i>      | -1,02 | 7,30E-01 | 8,89E-01 |
| <i>A_24_P92844</i>     | -1,01 | 7,30E-01 | 8,89E-01 |
| <i>FRG2</i>            | 1,01  | 7,30E-01 | 8,89E-01 |
| <i>GAB2</i>            | -1,06 | 7,30E-01 | 8,89E-01 |
| <i>TncRNA</i>          | -1,02 | 7,30E-01 | 8,89E-01 |
| <i>BC053880</i>        | -1,02 | 7,30E-01 | 8,89E-01 |
| <i>THC2450504</i>      | -1,02 | 7,30E-01 | 8,89E-01 |

|                        |       |          |          |
|------------------------|-------|----------|----------|
| <i>CLCN2</i>           | -1,01 | 7,30E-01 | 8,89E-01 |
| <i>BAT5</i>            | -1,01 | 7,30E-01 | 8,89E-01 |
| <i>PGAM1</i>           | -1,01 | 7,30E-01 | 8,89E-01 |
| <i>A_24_P307255</i>    | -1,01 | 7,30E-01 | 8,89E-01 |
| <i>ATG3</i>            | -1,01 | 7,30E-01 | 8,89E-01 |
| <i>CFHR4</i>           | 1,02  | 7,30E-01 | 8,89E-01 |
| <i>THC2457193</i>      | 1,02  | 7,30E-01 | 8,89E-01 |
| <i>THC2405434</i>      | 1,02  | 7,30E-01 | 8,89E-01 |
| <i>DUOXA2</i>          | -1,01 | 7,30E-01 | 8,89E-01 |
| <i>SFI1</i>            | -1,02 | 7,31E-01 | 8,89E-01 |
| <i>A_32_P71456</i>     | -1,01 | 7,31E-01 | 8,89E-01 |
| <i>A_23_P250072</i>    | 1,01  | 7,31E-01 | 8,89E-01 |
| <i>C18orf37</i>        | 1,02  | 7,31E-01 | 8,89E-01 |
| <i>CLEC7A</i>          | 1,02  | 7,31E-01 | 8,89E-01 |
| <i>BC035069</i>        | 1,03  | 7,31E-01 | 8,89E-01 |
| <i>PRRG4</i>           | 1,02  | 7,31E-01 | 8,89E-01 |
| <i>TARS</i>            | 1,01  | 7,31E-01 | 8,89E-01 |
| <i>FKBP10</i>          | -1,04 | 7,31E-01 | 8,89E-01 |
| <i>EHD2</i>            | 1,01  | 7,31E-01 | 8,89E-01 |
| <i>SHANK2</i>          | 1,01  | 7,31E-01 | 8,89E-01 |
| <i>RXRβ</i>            | 1,02  | 7,31E-01 | 8,89E-01 |
| <i>TSSC1</i>           | 1,02  | 7,31E-01 | 8,89E-01 |
| <i>LOC440295</i>       | -1,02 | 7,31E-01 | 8,89E-01 |
| <i>LOC642730</i>       | 1,03  | 7,31E-01 | 8,89E-01 |
| <i>A_24_P920483</i>    | 1,01  | 7,31E-01 | 8,90E-01 |
| <i>A_24_P917457</i>    | -1,02 | 7,31E-01 | 8,90E-01 |
| <i>BC032585</i>        | -1,01 | 7,31E-01 | 8,90E-01 |
| <i>BTBD5</i>           | -1,01 | 7,31E-01 | 8,90E-01 |
| <i>AK123826</i>        | 1,01  | 7,31E-01 | 8,90E-01 |
| <i>ENST00000370599</i> | -1,05 | 7,31E-01 | 8,90E-01 |
| <i>A_32_P59990</i>     | -1,01 | 7,32E-01 | 8,90E-01 |
| <i>SMOX</i>            | -1,03 | 7,32E-01 | 8,90E-01 |
| <i>THC2410504</i>      | -1,02 | 7,32E-01 | 8,90E-01 |
| <i>A_32_P131870</i>    | -1,02 | 7,32E-01 | 8,90E-01 |
| <i>A_24_P802562</i>    | -1,02 | 7,32E-01 | 8,90E-01 |
| <i>RCV1</i>            | -1,02 | 7,32E-01 | 8,90E-01 |
| <i>GTSE1</i>           | -1,01 | 7,32E-01 | 8,90E-01 |
| <i>TBCCD1</i>          | -1,01 | 7,32E-01 | 8,90E-01 |
| <i>AP1S1</i>           | 1,01  | 7,32E-01 | 8,90E-01 |
| <i>A_24_P926354</i>    | 1,01  | 7,32E-01 | 8,90E-01 |
| <i>PTRH2</i>           | 1,01  | 7,32E-01 | 8,90E-01 |
| <i>EFCAB4B</i>         | 1,01  | 7,32E-01 | 8,90E-01 |
| <i>AF118071</i>        | 1,02  | 7,32E-01 | 8,90E-01 |
| <i>FLJ41603</i>        | 1,04  | 7,32E-01 | 8,90E-01 |

|                        |       |          |          |
|------------------------|-------|----------|----------|
| <i>ACTC</i>            | 1,09  | 7,32E-01 | 8,90E-01 |
| <i>PKP1</i>            | 1,05  | 7,32E-01 | 8,90E-01 |
| <i>P2RY1</i>           | 1,03  | 7,32E-01 | 8,90E-01 |
| <i>CDK5RAP2</i>        | 1,02  | 7,32E-01 | 8,90E-01 |
| <i>ENST00000373670</i> | -1,01 | 7,32E-01 | 8,90E-01 |
| <i>NP107055</i>        | 1,01  | 7,32E-01 | 8,90E-01 |
| <i>A_32_P90178</i>     | 1,02  | 7,32E-01 | 8,90E-01 |
| <i>FLJ10916</i>        | -1,05 | 7,32E-01 | 8,90E-01 |
| <i>C1orf175</i>        | -1,02 | 7,32E-01 | 8,90E-01 |
| <i>STAB1</i>           | -1,03 | 7,32E-01 | 8,90E-01 |
| <i>BMP4</i>            | -1,03 | 7,32E-01 | 8,90E-01 |
| <i>AK000420</i>        | -1,02 | 7,32E-01 | 8,90E-01 |
| <i>THC2436597</i>      | 1,01  | 7,33E-01 | 8,90E-01 |
| <i>MRPL46</i>          | -1,01 | 7,33E-01 | 8,90E-01 |
| <i>A_24_P910589</i>    | 1,01  | 7,33E-01 | 8,90E-01 |
| <i>BC039021</i>        | 1,01  | 7,33E-01 | 8,90E-01 |
| <i>EDEM1</i>           | 1,02  | 7,33E-01 | 8,90E-01 |
| <i>ACMSD</i>           | 1,01  | 7,33E-01 | 8,90E-01 |
| <i>AK023018</i>        | 1,02  | 7,33E-01 | 8,90E-01 |
| <i>LMBR1L</i>          | -1,01 | 7,33E-01 | 8,90E-01 |
| <i>A_32_P118969</i>    | 1,01  | 7,33E-01 | 8,90E-01 |
| <i>CICE</i>            | 1,02  | 7,33E-01 | 8,90E-01 |
| <i>PASD1</i>           | 1,02  | 7,33E-01 | 8,90E-01 |
| <i>GNG4</i>            | -1,03 | 7,33E-01 | 8,90E-01 |
| <i>CCS</i>             | 1,01  | 7,33E-01 | 8,90E-01 |
| <i>HLA-DQB1</i>        | -1,03 | 7,33E-01 | 8,90E-01 |
| <i>LOC389904</i>       | -1,01 | 7,33E-01 | 8,90E-01 |
| <i>C2orf21</i>         | 1,01  | 7,34E-01 | 8,91E-01 |
| <i>SDK2</i>            | 1,02  | 7,34E-01 | 8,91E-01 |
| <i>BM982926</i>        | -1,03 | 7,34E-01 | 8,91E-01 |
| <i>AI199605</i>        | -1,01 | 7,34E-01 | 8,91E-01 |
| <i>SLC44A4</i>         | -1,01 | 7,34E-01 | 8,91E-01 |
| <i>AA609065</i>        | -1,01 | 7,34E-01 | 8,91E-01 |
| <i>KIAA1467</i>        | 1,01  | 7,34E-01 | 8,91E-01 |
| <i>FLJ12949</i>        | 1,01  | 7,34E-01 | 8,91E-01 |
| <i>ENST00000216323</i> | 1,01  | 7,34E-01 | 8,91E-01 |
| <i>ENST00000338711</i> | 1,01  | 7,34E-01 | 8,91E-01 |
| <i>C19orf30</i>        | 1,01  | 7,34E-01 | 8,91E-01 |
| <i>SSSCA1</i>          | 1,01  | 7,34E-01 | 8,91E-01 |
| <i>MRPL12</i>          | 1,02  | 7,34E-01 | 8,91E-01 |
| <i>KLHDC6</i>          | 1,02  | 7,34E-01 | 8,91E-01 |
| <i>ZFYVE28</i>         | 1,02  | 7,34E-01 | 8,91E-01 |
| <i>SSR1</i>            | 1,03  | 7,34E-01 | 8,91E-01 |
| <i>ACSL6</i>           | 1,04  | 7,34E-01 | 8,91E-01 |

|                        |       |          |          |
|------------------------|-------|----------|----------|
| <i>CTAG1A</i>          | 1,09  | 7,34E-01 | 8,91E-01 |
| <i>GLT25D1</i>         | 1,02  | 7,34E-01 | 8,91E-01 |
| <i>RP5-1077B9.4</i>    | -1,02 | 7,34E-01 | 8,91E-01 |
| <i>R3HDML</i>          | -1,01 | 7,34E-01 | 8,91E-01 |
| <i>BIO26064</i>        | -1,09 | 7,34E-01 | 8,91E-01 |
| <i>KMO</i>             | -1,01 | 7,34E-01 | 8,91E-01 |
| <i>KIAA1414</i>        | 1,01  | 7,35E-01 | 8,91E-01 |
| <i>MDS032</i>          | 1,01  | 7,35E-01 | 8,91E-01 |
| <i>ENST00000377093</i> | 1,02  | 7,34E-01 | 8,91E-01 |
| <i>LRRTM1</i>          | 1,02  | 7,34E-01 | 8,91E-01 |
| <i>A_32_P429046</i>    | -1,03 | 7,35E-01 | 8,91E-01 |
| <i>NDRG2</i>           | -1,02 | 7,35E-01 | 8,91E-01 |
| <i>ENST00000360166</i> | -1,02 | 7,35E-01 | 8,91E-01 |
| <i>UGT2B15</i>         | -1,02 | 7,35E-01 | 8,91E-01 |
| <i>KIAA2013</i>        | -1,02 | 7,35E-01 | 8,91E-01 |
| <i>DEFA4</i>           | -1,01 | 7,35E-01 | 8,91E-01 |
| <i>THC2374977</i>      | -1,01 | 7,35E-01 | 8,91E-01 |
| <i>A_24_P920926</i>    | -1,01 | 7,35E-01 | 8,91E-01 |
| <i>CABP2</i>           | -1,01 | 7,35E-01 | 8,91E-01 |
| <i>A_24_P938433</i>    | 1,01  | 7,35E-01 | 8,91E-01 |
| <i>THC2315334</i>      | 1,01  | 7,35E-01 | 8,91E-01 |
| <i>AF118086</i>        | 1,01  | 7,35E-01 | 8,91E-01 |
| <i>FLJ34077</i>        | 1,01  | 7,35E-01 | 8,91E-01 |
| <i>KRTAP9-3</i>        | 1,01  | 7,35E-01 | 8,91E-01 |
| <i>MAFG</i>            | 1,01  | 7,35E-01 | 8,91E-01 |
| <i>TUBG1</i>           | 1,02  | 7,35E-01 | 8,91E-01 |
| <i>ST6GAL1</i>         | 1,02  | 7,35E-01 | 8,91E-01 |
| <i>TTC25</i>           | 1,02  | 7,35E-01 | 8,91E-01 |
| <i>TNRC4</i>           | 1,03  | 7,35E-01 | 8,91E-01 |
| <i>A_24_P384200</i>    | 1,04  | 7,35E-01 | 8,91E-01 |
| <i>A_24_P770721</i>    | 1,04  | 7,35E-01 | 8,91E-01 |
| <i>A_24_P911754</i>    | -1,02 | 7,35E-01 | 8,91E-01 |
| <i>OR8D2</i>           | -1,01 | 7,35E-01 | 8,91E-01 |
| <i>SAMD9</i>           | -1,01 | 7,35E-01 | 8,91E-01 |
| <i>L08961</i>          | -1,01 | 7,36E-01 | 8,91E-01 |
| <i>C22orf24</i>        | -1,01 | 7,36E-01 | 8,91E-01 |
| <i>BQ071984</i>        | 1,02  | 7,36E-01 | 8,91E-01 |
| <i>ENST00000358916</i> | -1,04 | 7,36E-01 | 8,92E-01 |
| <i>C6orf142</i>        | -1,02 | 7,36E-01 | 8,92E-01 |
| <i>ARRDC2</i>          | -1,02 | 7,36E-01 | 8,92E-01 |
| <i>Z43965</i>          | -1,02 | 7,36E-01 | 8,92E-01 |
| <i>C6orf195</i>        | -1,01 | 7,36E-01 | 8,92E-01 |
| <i>ENST00000320746</i> | -1,01 | 7,36E-01 | 8,92E-01 |
| <i>AK094726</i>        | -1,01 | 7,36E-01 | 8,92E-01 |



|                        |       |          |          |
|------------------------|-------|----------|----------|
| <i>LRFN1</i>           | -1,01 | 7,36E-01 | 8,92E-01 |
| <i>THC2442875</i>      | -1,01 | 7,37E-01 | 8,92E-01 |
| <i>CLCNKA</i>          | -1,01 | 7,36E-01 | 8,92E-01 |
| <i>OSBP</i>            | 1,01  | 7,36E-01 | 8,92E-01 |
| <i>A_24_P474384</i>    | 1,01  | 7,36E-01 | 8,92E-01 |
| <i>C1orf33</i>         | 1,01  | 7,36E-01 | 8,92E-01 |
| <i>THC2291074</i>      | 1,01  | 7,36E-01 | 8,92E-01 |
| <i>A_24_P67574</i>     | 1,01  | 7,36E-01 | 8,92E-01 |
| <i>H41076</i>          | 1,01  | 7,36E-01 | 8,92E-01 |
| <i>ABO15616</i>        | 1,01  | 7,36E-01 | 8,92E-01 |
| <i>CLDN16</i>          | 1,02  | 7,36E-01 | 8,92E-01 |
| <i>NME2</i>            | 1,02  | 7,36E-01 | 8,92E-01 |
| <i>EBF</i>             | 1,02  | 7,36E-01 | 8,92E-01 |
| <i>ENST00000381929</i> | 1,04  | 7,36E-01 | 8,92E-01 |
| <i>C10orf136</i>       | 1,01  | 7,37E-01 | 8,92E-01 |
| <i>TBCA</i>            | 1,01  | 7,37E-01 | 8,92E-01 |
| <i>ETV5</i>            | -1,02 | 7,37E-01 | 8,92E-01 |
| <i>LOC441046</i>       | -1,01 | 7,37E-01 | 8,92E-01 |
| <i>MLANA</i>           | -1,01 | 7,37E-01 | 8,92E-01 |
| <i>BSDC1</i>           | 1,02  | 7,37E-01 | 8,92E-01 |
| <i>PLK2</i>            | 1,05  | 7,37E-01 | 8,92E-01 |
| <i>A_24_P144666</i>    | -1,06 | 7,37E-01 | 8,92E-01 |
| <i>DNAJC19</i>         | 1,01  | 7,37E-01 | 8,92E-01 |
| <i>UROS</i>            | 1,02  | 7,37E-01 | 8,92E-01 |
| <i>A_24_P255914</i>    | 1,02  | 7,37E-01 | 8,92E-01 |
| <i>A_24_P315754</i>    | 1,02  | 7,37E-01 | 8,92E-01 |
| <i>DRP2</i>            | -1,01 | 7,37E-01 | 8,92E-01 |
| <i>FLJ10120</i>        | 1,01  | 7,37E-01 | 8,92E-01 |
| <i>ANKRD15</i>         | -1,04 | 7,37E-01 | 8,92E-01 |
| <i>THC2380080</i>      | -1,01 | 7,37E-01 | 8,92E-01 |
| <i>BG775850</i>        | 1,02  | 7,37E-01 | 8,92E-01 |
| <i>A_32_P213946</i>    | 1,02  | 7,37E-01 | 8,92E-01 |
| <i>SPRR1A</i>          | -1,13 | 7,38E-01 | 8,92E-01 |
| <i>ALDH1A3</i>         | -1,04 | 7,38E-01 | 8,92E-01 |
| <i>PGAM5</i>           | -1,01 | 7,38E-01 | 8,92E-01 |
| <i>HOXC13</i>          | 1,01  | 7,38E-01 | 8,92E-01 |
| <i>THC2340673</i>      | 1,02  | 7,38E-01 | 8,92E-01 |
| <i>MCHR1</i>           | -1,02 | 7,38E-01 | 8,93E-01 |
| <i>A_24_P272798</i>    | -1,01 | 7,38E-01 | 8,93E-01 |
| <i>PCK2</i>            | -1,02 | 7,38E-01 | 8,93E-01 |
| <i>TAX1BP3</i>         | -1,02 | 7,38E-01 | 8,93E-01 |
| <i>A_24_P383934</i>    | -1,02 | 7,38E-01 | 8,93E-01 |
| <i>ENST00000357603</i> | -1,02 | 7,38E-01 | 8,93E-01 |
| <i>A_24_P333112</i>    | -1,02 | 7,38E-01 | 8,93E-01 |

|                        |       |          |          |
|------------------------|-------|----------|----------|
| <i>ENST00000333650</i> | 1,01  | 7,38E-01 | 8,93E-01 |
| <i>A_24_P346859</i>    | 1,02  | 7,38E-01 | 8,93E-01 |
| <i>ERICH1</i>          | 1,01  | 7,38E-01 | 8,93E-01 |
| <i>BF923810</i>        | 1,02  | 7,38E-01 | 8,93E-01 |
| <i>A_24_P410070</i>    | -1,02 | 7,39E-01 | 8,93E-01 |
| <i>PCDHGB8P</i>        | -1,01 | 7,39E-01 | 8,93E-01 |
| <i>R78502</i>          | -1,01 | 7,39E-01 | 8,93E-01 |
| <i>C1orf43</i>         | 1,01  | 7,39E-01 | 8,93E-01 |
| <i>BPIL1</i>           | 1,02  | 7,39E-01 | 8,93E-01 |
| <i>CR609905</i>        | 1,01  | 7,39E-01 | 8,93E-01 |
| <i>GALNT13</i>         | -1,02 | 7,39E-01 | 8,93E-01 |
| <i>FKBP8</i>           | 1,01  | 7,39E-01 | 8,93E-01 |
| <i>S69873</i>          | -1,01 | 7,39E-01 | 8,93E-01 |
| <i>A_24_P924777</i>    | -1,01 | 7,39E-01 | 8,93E-01 |
| <i>AF279773</i>        | 1,01  | 7,39E-01 | 8,93E-01 |
| <i>DPM2</i>            | -1,01 | 7,39E-01 | 8,93E-01 |
| <i>CYB5D2</i>          | -1,01 | 7,39E-01 | 8,93E-01 |
| <i>38231</i>           | 1,02  | 7,39E-01 | 8,93E-01 |
| <i>LMO1</i>            | -1,02 | 7,39E-01 | 8,93E-01 |
| <i>TNFRSF6B</i>        | 1,01  | 7,39E-01 | 8,94E-01 |
| <i>FLJ12118</i>        | -1,01 | 7,40E-01 | 8,94E-01 |
| <i>X92778</i>          | -1,01 | 7,40E-01 | 8,94E-01 |
| <i>BE707436</i>        | 1,01  | 7,40E-01 | 8,94E-01 |
| <i>C15orf31</i>        | 1,02  | 7,40E-01 | 8,94E-01 |
| <i>MPP4</i>            | -1,02 | 7,40E-01 | 8,94E-01 |
| <i>C1orf2</i>          | -1,02 | 7,40E-01 | 8,94E-01 |
| <i>A_24_P925673</i>    | -1,01 | 7,40E-01 | 8,94E-01 |
| <i>SEMA7A</i>          | 1,01  | 7,40E-01 | 8,94E-01 |
| <i>MGC22014</i>        | 1,01  | 7,40E-01 | 8,94E-01 |
| <i>A_24_P306921</i>    | 1,05  | 7,40E-01 | 8,94E-01 |
| <i>BF373107</i>        | -1,02 | 7,40E-01 | 8,94E-01 |
| <i>ATRN</i>            | -1,01 | 7,40E-01 | 8,94E-01 |
| <i>SPRR2B</i>          | -1,08 | 7,40E-01 | 8,94E-01 |
| <i>AL834311</i>        | -1,01 | 7,40E-01 | 8,94E-01 |
| <i>ALDH8A1</i>         | 1,01  | 7,40E-01 | 8,94E-01 |
| <i>THC2365247</i>      | 1,04  | 7,40E-01 | 8,94E-01 |
| <i>AF116620</i>        | -1,01 | 7,40E-01 | 8,94E-01 |
| <i>AW874698</i>        | 1,01  | 7,40E-01 | 8,94E-01 |
| <i>LOC643406</i>       | 1,01  | 7,40E-01 | 8,94E-01 |
| <i>ENST00000382595</i> | 1,02  | 7,40E-01 | 8,94E-01 |
| <i>DKFZp434K1815</i>   | 1,02  | 7,40E-01 | 8,94E-01 |
| <i>THC2403031</i>      | 1,01  | 7,40E-01 | 8,94E-01 |
| <i>THC2416598</i>      | -1,01 | 7,40E-01 | 8,94E-01 |
| <i>C11orf16</i>        | 1,01  | 7,40E-01 | 8,94E-01 |

|                        |       |          |          |
|------------------------|-------|----------|----------|
| <i>FLJ40453</i>        | 1,01  | 7,40E-01 | 8,94E-01 |
| <i>A_32_P89480</i>     | 1,02  | 7,40E-01 | 8,94E-01 |
| <i>AL355699</i>        | 1,02  | 7,41E-01 | 8,94E-01 |
| <i>FN1</i>             | 1,04  | 7,41E-01 | 8,94E-01 |
| <i>THC2269888</i>      | 1,01  | 7,41E-01 | 8,94E-01 |
| <i>A_24_P930690</i>    | -1,01 | 7,41E-01 | 8,94E-01 |
| <i>OR7A5</i>           | -1,01 | 7,41E-01 | 8,94E-01 |
| <i>THC2301371</i>      | 1,04  | 7,41E-01 | 8,94E-01 |
| <i>ACSS2</i>           | 1,01  | 7,41E-01 | 8,95E-01 |
| <i>NCDN</i>            | -1,02 | 7,41E-01 | 8,95E-01 |
| <i>ANAPC2</i>          | 1,01  | 7,41E-01 | 8,95E-01 |
| <i>A_24_P178693</i>    | -1,03 | 7,42E-01 | 8,95E-01 |
| <i>ENST00000369334</i> | -1,02 | 7,41E-01 | 8,95E-01 |
| <i>AA065200</i>        | -1,01 | 7,41E-01 | 8,95E-01 |
| <i>C4orf17</i>         | -1,01 | 7,42E-01 | 8,95E-01 |
| <i>GAGE1</i>           | -1,01 | 7,42E-01 | 8,95E-01 |
| <i>LOC401397</i>       | 1,01  | 7,42E-01 | 8,95E-01 |
| <i>TSPAN31</i>         | -1,01 | 7,42E-01 | 8,95E-01 |
| <i>LRPPRC</i>          | -1,01 | 7,42E-01 | 8,95E-01 |
| <i>BC013423</i>        | -1,03 | 7,42E-01 | 8,95E-01 |
| <i>PPID</i>            | -1,15 | 7,42E-01 | 8,95E-01 |
| <i>GLYATL1</i>         | 1,01  | 7,42E-01 | 8,95E-01 |
| <i>UXS1</i>            | 1,01  | 7,42E-01 | 8,95E-01 |
| <i>FAM123A</i>         | -1,01 | 7,42E-01 | 8,95E-01 |
| <i>PPM1E</i>           | 1,01  | 7,42E-01 | 8,95E-01 |
| <i>FOXO1A</i>          | 1,03  | 7,42E-01 | 8,95E-01 |
| <i>PROS1</i>           | -1,02 | 7,42E-01 | 8,95E-01 |
| <i>TARDBP</i>          | -1,01 | 7,42E-01 | 8,95E-01 |
| <i>ZDHHC3</i>          | 1,01  | 7,42E-01 | 8,95E-01 |
| <i>KRTAP4-3</i>        | -1,01 | 7,43E-01 | 8,95E-01 |
| <i>CRYGA</i>           | -1,01 | 7,43E-01 | 8,95E-01 |
| <i>CCDC83</i>          | -1,01 | 7,43E-01 | 8,95E-01 |
| <i>ENST00000373268</i> | 1,02  | 7,42E-01 | 8,95E-01 |
| <i>NCBP2</i>           | 1,02  | 7,43E-01 | 8,95E-01 |
| <i>A_24_P929042</i>    | 1,03  | 7,43E-01 | 8,95E-01 |
| <i>OVOL1</i>           | 1,07  | 7,42E-01 | 8,95E-01 |
| <i>THC2358101</i>      | 1,02  | 7,43E-01 | 8,95E-01 |
| <i>IL18BP</i>          | -1,01 | 7,43E-01 | 8,95E-01 |
| <i>AK095012</i>        | 1,01  | 7,43E-01 | 8,95E-01 |
| <i>ENST00000374537</i> | 1,02  | 7,43E-01 | 8,95E-01 |
| <i>FLJ10847</i>        | 1,02  | 7,43E-01 | 8,95E-01 |
| <i>C1QL1</i>           | -1,03 | 7,43E-01 | 8,95E-01 |
| <i>THC2408173</i>      | -1,03 | 7,43E-01 | 8,95E-01 |
| <i>ENST00000317571</i> | -1,02 | 7,43E-01 | 8,95E-01 |

|                        |       |          |          |
|------------------------|-------|----------|----------|
| <i>HMBOX1</i>          | -1,02 | 7,43E-01 | 8,95E-01 |
| <i>AK091528</i>        | -1,02 | 7,43E-01 | 8,95E-01 |
| <i>MMP3</i>            | -1,02 | 7,43E-01 | 8,95E-01 |
| <i>PHF2</i>            | -1,01 | 7,43E-01 | 8,95E-01 |
| <i>CXorf38</i>         | -1,01 | 7,43E-01 | 8,95E-01 |
| <i>THC2445080</i>      | -1,01 | 7,43E-01 | 8,95E-01 |
| <i>TNP2</i>            | -1,01 | 7,43E-01 | 8,95E-01 |
| <i>TMEM55B</i>         | -1,01 | 7,43E-01 | 8,95E-01 |
| <i>FBXO7</i>           | 1,01  | 7,43E-01 | 8,95E-01 |
| <i>THC2456412</i>      | -1,01 | 7,43E-01 | 8,95E-01 |
| <i>C1orf88</i>         | 1,03  | 7,43E-01 | 8,95E-01 |
| <i>ME3</i>             | -1,03 | 7,43E-01 | 8,95E-01 |
| <i>A_23_P5171</i>      | -1,02 | 7,43E-01 | 8,95E-01 |
| <i>C10orf61</i>        | -1,01 | 7,43E-01 | 8,95E-01 |
| <i>TBR1</i>            | 1,01  | 7,43E-01 | 8,95E-01 |
| <i>ENST00000309379</i> | -1,03 | 7,43E-01 | 8,95E-01 |
| <i>AK025278</i>        | 1,01  | 7,43E-01 | 8,95E-01 |
| <i>BC030084</i>        | -1,02 | 7,44E-01 | 8,96E-01 |
| <i>LOC642005</i>       | -1,03 | 7,44E-01 | 8,96E-01 |
| <i>TAS2R46</i>         | 1,01  | 7,44E-01 | 8,96E-01 |
| <i>AL049990</i>        | 1,04  | 7,44E-01 | 8,96E-01 |
| <i>ARMC4</i>           | -1,02 | 7,44E-01 | 8,96E-01 |
| <i>BI439791</i>        | 1,01  | 7,44E-01 | 8,96E-01 |
| <i>AW300278</i>        | 1,01  | 7,44E-01 | 8,96E-01 |
| <i>HEPN1</i>           | -1,02 | 7,44E-01 | 8,96E-01 |
| <i>THC2319816</i>      | -1,02 | 7,44E-01 | 8,96E-01 |
| <i>LOC400604</i>       | -1,02 | 7,45E-01 | 8,96E-01 |
| <i>BRI3BP</i>          | 1,02  | 7,45E-01 | 8,96E-01 |
| <i>CK300181</i>        | 1,02  | 7,45E-01 | 8,96E-01 |
| <i>HACE1</i>           | -1,02 | 7,45E-01 | 8,96E-01 |
| <i>F9</i>              | -1,01 | 7,45E-01 | 8,96E-01 |
| <i>AA069768</i>        | -1,01 | 7,45E-01 | 8,96E-01 |
| <i>AMFR</i>            | -1,01 | 7,45E-01 | 8,96E-01 |
| <i>ENST00000372313</i> | 1,02  | 7,45E-01 | 8,96E-01 |
| <i>A_24_P920038</i>    | 1,02  | 7,45E-01 | 8,96E-01 |
| <i>AA847548</i>        | 1,02  | 7,45E-01 | 8,96E-01 |
| <i>TEAD1</i>           | -1,01 | 7,45E-01 | 8,96E-01 |
| <i>FAM35A</i>          | -1,01 | 7,45E-01 | 8,96E-01 |
| <i>AF119895</i>        | 1,01  | 7,45E-01 | 8,96E-01 |
| <i>SSTR5</i>           | 1,01  | 7,45E-01 | 8,96E-01 |
| <i>P53AIP1</i>         | 1,02  | 7,45E-01 | 8,96E-01 |
| <i>ENST00000354619</i> | 1,02  | 7,45E-01 | 8,96E-01 |
| <i>CCDC67</i>          | -1,01 | 7,45E-01 | 8,97E-01 |
| <i>AK094991</i>        | 1,02  | 7,45E-01 | 8,97E-01 |

|                        |       |          |          |
|------------------------|-------|----------|----------|
| <i>ENST00000360896</i> | 1,03  | 7,45E-01 | 8,97E-01 |
| <i>DKFZp313P036</i>    | 1,03  | 7,45E-01 | 8,97E-01 |
| <i>ARMC9</i>           | -1,02 | 7,45E-01 | 8,97E-01 |
| <i>CR590071</i>        | -1,02 | 7,45E-01 | 8,97E-01 |
| <i>GNMT</i>            | 1,01  | 7,45E-01 | 8,97E-01 |
| <i>CHRDL1</i>          | -1,06 | 7,46E-01 | 8,97E-01 |
| <i>TMEM40</i>          | -1,05 | 7,46E-01 | 8,97E-01 |
| <i>NPM2</i>            | -1,03 | 7,46E-01 | 8,97E-01 |
| <i>CXorf39</i>         | -1,02 | 7,46E-01 | 8,97E-01 |
| <i>LOC134145</i>       | -1,01 | 7,46E-01 | 8,97E-01 |
| <i>A_24_P931817</i>    | -1,01 | 7,46E-01 | 8,97E-01 |
| <i>BC033359</i>        | -1,01 | 7,46E-01 | 8,97E-01 |
| <i>ENST00000341016</i> | 1,01  | 7,46E-01 | 8,97E-01 |
| <i>CCDC43</i>          | 1,01  | 7,46E-01 | 8,97E-01 |
| <i>RP11-255A11.18</i>  | 1,01  | 7,46E-01 | 8,97E-01 |
| <i>A_24_P281468</i>    | 1,02  | 7,46E-01 | 8,97E-01 |
| <i>A_23_P255111</i>    | 1,03  | 7,46E-01 | 8,97E-01 |
| <i>THC2340020</i>      | 1,01  | 7,46E-01 | 8,97E-01 |
| <i>PSAT1</i>           | -1,02 | 7,46E-01 | 8,97E-01 |
| <i>AX721252</i>        | -1,02 | 7,46E-01 | 8,97E-01 |
| <i>SP140</i>           | -1,01 | 7,46E-01 | 8,97E-01 |
| <i>FLJ30719</i>        | 1,01  | 7,46E-01 | 8,97E-01 |
| <i>UBE3B</i>           | 1,01  | 7,46E-01 | 8,97E-01 |
| <i>NPTN</i>            | 1,02  | 7,46E-01 | 8,97E-01 |
| <i>A_24_P110082</i>    | -1,01 | 7,46E-01 | 8,97E-01 |
| <i>ADAM32</i>          | 1,02  | 7,46E-01 | 8,97E-01 |
| <i>GFI1B</i>           | -1,01 | 7,47E-01 | 8,97E-01 |
| <i>DCAL1</i>           | -1,02 | 7,47E-01 | 8,97E-01 |
| <i>ENST00000315208</i> | 1,03  | 7,47E-01 | 8,97E-01 |
| <i>THC2308298</i>      | 1,01  | 7,47E-01 | 8,97E-01 |
| <i>ENST00000381854</i> | -1,03 | 7,47E-01 | 8,97E-01 |
| <i>LOC388284</i>       | 1,01  | 7,47E-01 | 8,97E-01 |
| <i>TAAR1</i>           | 1,02  | 7,47E-01 | 8,97E-01 |
| <i>NKD1</i>            | 1,02  | 7,47E-01 | 8,97E-01 |
| <i>AK124080</i>        | 1,02  | 7,47E-01 | 8,97E-01 |
| <i>ENST00000368153</i> | -1,03 | 7,47E-01 | 8,97E-01 |
| <i>THC2315966</i>      | -1,02 | 7,47E-01 | 8,97E-01 |
| <i>LOC390876</i>       | -1,01 | 7,47E-01 | 8,97E-01 |
| <i>MRPL15</i>          | -1,01 | 7,47E-01 | 8,97E-01 |
| <i>ETG10_13482</i>     | -1,01 | 7,47E-01 | 8,97E-01 |
| <i>TMEM106C</i>        | 1,02  | 7,47E-01 | 8,97E-01 |
| <i>LOC152485</i>       | 1,02  | 7,47E-01 | 8,97E-01 |
| <i>ENST00000309746</i> | 1,04  | 7,47E-01 | 8,97E-01 |
| <i>BC002811</i>        | -1,02 | 7,47E-01 | 8,97E-01 |

|                     |       |          |          |
|---------------------|-------|----------|----------|
| <i>THC2280612</i>   | -1,01 | 7,47E-01 | 8,97E-01 |
| <i>THC2378652</i>   | -1,01 | 7,47E-01 | 8,97E-01 |
| <i>DDT</i>          | -1,01 | 7,47E-01 | 8,97E-01 |
| <i>MRPS30</i>       | 1,01  | 7,47E-01 | 8,97E-01 |
| <i>PADI2</i>        | 1,02  | 7,47E-01 | 8,97E-01 |
| <i>LOC146177</i>    | 1,01  | 7,47E-01 | 8,97E-01 |
| <i>A_24_P392742</i> | -1,01 | 7,48E-01 | 8,97E-01 |
| <i>RNF5</i>         | 1,01  | 7,48E-01 | 8,97E-01 |
| <i>MEP1B</i>        | 1,01  | 7,47E-01 | 8,97E-01 |
| <i>POLR1A</i>       | 1,01  | 7,48E-01 | 8,98E-01 |
| <i>FAM105B</i>      | 1,01  | 7,48E-01 | 8,98E-01 |
| <i>BQ272125</i>     | 1,01  | 7,48E-01 | 8,98E-01 |
| <i>A_24_P932706</i> | 1,01  | 7,48E-01 | 8,98E-01 |
| <i>C1orf161</i>     | -1,01 | 7,48E-01 | 8,98E-01 |
| <i>A_24_P238186</i> | 1,03  | 7,48E-01 | 8,98E-01 |
| <i>C22orf35</i>     | -1,04 | 7,48E-01 | 8,98E-01 |
| <i>TCF15</i>        | -1,02 | 7,48E-01 | 8,98E-01 |
| <i>ZNF524</i>       | -1,01 | 7,48E-01 | 8,98E-01 |
| <i>A_23_P212149</i> | -1,01 | 7,48E-01 | 8,98E-01 |
| <i>KIR3DL3</i>      | 1,01  | 7,48E-01 | 8,98E-01 |
| <i>AK023620</i>     | 1,01  | 7,48E-01 | 8,98E-01 |
| <i>STS-1</i>        | 1,02  | 7,48E-01 | 8,98E-01 |
| <i>SERPINB13</i>    | -1,06 | 7,48E-01 | 8,98E-01 |
| <i>SSX9</i>         | -1,02 | 7,48E-01 | 8,98E-01 |
| <i>PCDHB11</i>      | -1,01 | 7,48E-01 | 8,98E-01 |
| <i>VSX1</i>         | 1,02  | 7,48E-01 | 8,98E-01 |
| <i>A_24_P281605</i> | 1,02  | 7,48E-01 | 8,98E-01 |
| <i>A_24_P238896</i> | 1,03  | 7,48E-01 | 8,98E-01 |
| <i>A_24_P315885</i> | -1,01 | 7,49E-01 | 8,98E-01 |
| <i>BM511013</i>     | 1,02  | 7,49E-01 | 8,98E-01 |
| <i>A_24_P523345</i> | -1,01 | 7,49E-01 | 8,98E-01 |
| <i>NR112</i>        | -1,01 | 7,49E-01 | 8,98E-01 |
| <i>CELSR2</i>       | -1,02 | 7,49E-01 | 8,98E-01 |
| <i>GNG8</i>         | -1,02 | 7,49E-01 | 8,98E-01 |
| <i>C1orf65</i>      | 1,01  | 7,49E-01 | 8,98E-01 |
| <i>TMEM163</i>      | 1,01  | 7,49E-01 | 8,98E-01 |
| <i>WNT10A</i>       | -1,02 | 7,49E-01 | 8,98E-01 |
| <i>SUPT6H</i>       | 1,01  | 7,49E-01 | 8,99E-01 |
| <i>FER1L3</i>       | -1,01 | 7,49E-01 | 8,99E-01 |
| <i>FNDC5</i>        | -1,04 | 7,50E-01 | 8,99E-01 |
| <i>A_23_P202100</i> | -1,02 | 7,50E-01 | 8,99E-01 |
| <i>UBE1</i>         | -1,01 | 7,50E-01 | 8,99E-01 |
| <i>THC2347183</i>   | -1,01 | 7,50E-01 | 8,99E-01 |
| <i>LOC286161</i>    | 1,01  | 7,50E-01 | 8,99E-01 |

|                        |       |          |          |
|------------------------|-------|----------|----------|
| <i>A_24_P922862</i>    | 1,01  | 7,49E-01 | 8,99E-01 |
| <i>CLEC4D</i>          | 1,02  | 7,50E-01 | 8,99E-01 |
| <i>WFDC5</i>           | 1,02  | 7,50E-01 | 8,99E-01 |
| <i>CPEB3</i>           | -1,01 | 7,50E-01 | 8,99E-01 |
| <i>FLJ43080</i>        | 1,01  | 7,50E-01 | 8,99E-01 |
| <i>LOC200261</i>       | 1,01  | 7,50E-01 | 8,99E-01 |
| <i>HEXA</i>            | 1,02  | 7,50E-01 | 8,99E-01 |
| <i>A_24_P306644</i>    | 1,01  | 7,50E-01 | 8,99E-01 |
| <i>BC043261</i>        | 1,01  | 7,50E-01 | 8,99E-01 |
| <i>THC2270926</i>      | 1,03  | 7,50E-01 | 8,99E-01 |
| <i>BC065260</i>        | -1,02 | 7,50E-01 | 8,99E-01 |
| <i>A_24_P932598</i>    | 1,01  | 7,50E-01 | 8,99E-01 |
| <i>DNASE1L1</i>        | 1,02  | 7,50E-01 | 8,99E-01 |
| <i>CFC1</i>            | 1,02  | 7,50E-01 | 8,99E-01 |
| <i>PDK4</i>            | -1,04 | 7,50E-01 | 8,99E-01 |
| <i>A_24_P170067</i>    | -1,02 | 7,50E-01 | 8,99E-01 |
| <i>GDNF</i>            | -1,02 | 7,50E-01 | 8,99E-01 |
| <i>TINF2</i>           | 1,01  | 7,50E-01 | 8,99E-01 |
| <i>UNC93B1</i>         | 1,02  | 7,50E-01 | 8,99E-01 |
| <i>C17orf45</i>        | -1,01 | 7,50E-01 | 8,99E-01 |
| <i>GCKR</i>            | -1,01 | 7,50E-01 | 8,99E-01 |
| <i>A_24_P919825</i>    | -1,01 | 7,50E-01 | 8,99E-01 |
| <i>LOC619208</i>       | -1,02 | 7,50E-01 | 8,99E-01 |
| <i>A_24_P943258</i>    | 1,01  | 7,51E-01 | 8,99E-01 |
| <i>TRAFD1</i>          | -1,02 | 7,51E-01 | 8,99E-01 |
| <i>AK098414</i>        | 1,01  | 7,51E-01 | 8,99E-01 |
| <i>ENST00000382990</i> | -1,01 | 7,51E-01 | 8,99E-01 |
| <i>ENST00000368476</i> | 1,01  | 7,51E-01 | 8,99E-01 |
| <i>A_24_P153002</i>    | 1,02  | 7,51E-01 | 8,99E-01 |
| <i>A_24_P307443</i>    | -1,02 | 7,51E-01 | 8,99E-01 |
| <i>TBC1D20</i>         | -1,01 | 7,51E-01 | 8,99E-01 |
| <i>IL6R</i>            | 1,02  | 7,51E-01 | 8,99E-01 |
| <i>A_32_P69993</i>     | 1,01  | 7,51E-01 | 8,99E-01 |
| <i>HES5</i>            | -1,04 | 7,51E-01 | 8,99E-01 |
| <i>ADORA2A</i>         | 1,01  | 7,51E-01 | 8,99E-01 |
| <i>AK123506</i>        | 1,04  | 7,51E-01 | 8,99E-01 |
| <i>TMPRSS4</i>         | -1,03 | 7,51E-01 | 9,00E-01 |
| <i>A_24_P648391</i>    | -1,01 | 7,51E-01 | 9,00E-01 |
| <i>IL17A</i>           | 1,01  | 7,51E-01 | 9,00E-01 |
| <i>TBC1D2</i>          | 1,01  | 7,51E-01 | 9,00E-01 |
| <i>CR612573</i>        | 1,02  | 7,51E-01 | 9,00E-01 |
| <i>LOC645356</i>       | 1,02  | 7,51E-01 | 9,00E-01 |
| <i>CR749234</i>        | 1,02  | 7,51E-01 | 9,00E-01 |
| <i>DHX8</i>            | -1,01 | 7,52E-01 | 9,00E-01 |

|                        |       |          |          |
|------------------------|-------|----------|----------|
| <i>BC016751</i>        | 1,01  | 7,52E-01 | 9,00E-01 |
| <i>BC036627</i>        | 1,01  | 7,52E-01 | 9,00E-01 |
| <i>PRRT3</i>           | -1,02 | 7,52E-01 | 9,00E-01 |
| <i>PTGES3</i>          | -1,01 | 7,52E-01 | 9,00E-01 |
| <i>A_24_P920826</i>    | -1,01 | 7,52E-01 | 9,00E-01 |
| <i>AI332866</i>        | 1,01  | 7,52E-01 | 9,00E-01 |
| <i>A_24_P931613</i>    | 1,01  | 7,52E-01 | 9,00E-01 |
| <i>ENST00000375923</i> | 1,04  | 7,52E-01 | 9,00E-01 |
| <i>F2</i>              | -1,01 | 7,52E-01 | 9,00E-01 |
| <i>BC038371</i>        | 1,01  | 7,52E-01 | 9,00E-01 |
| <i>THC2279825</i>      | 1,02  | 7,52E-01 | 9,00E-01 |
| <i>TUBD1</i>           | -1,02 | 7,52E-01 | 9,00E-01 |
| <i>DPF3</i>            | 1,01  | 7,52E-01 | 9,00E-01 |
| <i>RFPL2</i>           | -1,01 | 7,52E-01 | 9,00E-01 |
| <i>AW844496</i>        | -1,02 | 7,52E-01 | 9,00E-01 |
| <i>MRGPRX4</i>         | -1,01 | 7,53E-01 | 9,00E-01 |
| <i>TMIGD2</i>          | -1,01 | 7,53E-01 | 9,00E-01 |
| <i>MUC5AC</i>          | -1,01 | 7,52E-01 | 9,00E-01 |
| <i>LCN1</i>            | 1,01  | 7,53E-01 | 9,00E-01 |
| <i>AK097102</i>        | 1,01  | 7,53E-01 | 9,00E-01 |
| <i>PPFIBP1</i>         | 1,02  | 7,53E-01 | 9,00E-01 |
| <i>KIAA0789</i>        | -1,05 | 7,53E-01 | 9,00E-01 |
| <i>GMPPA</i>           | -1,02 | 7,53E-01 | 9,00E-01 |
| <i>A_24_P24415</i>     | -1,02 | 7,53E-01 | 9,00E-01 |
| <i>FLJ38723</i>        | -1,01 | 7,53E-01 | 9,00E-01 |
| <i>AF268194</i>        | -1,01 | 7,53E-01 | 9,00E-01 |
| <i>A_24_P75856</i>     | 1,01  | 7,53E-01 | 9,00E-01 |
| <i>FAM46B</i>          | 1,04  | 7,53E-01 | 9,00E-01 |
| <i>MGC34713</i>        | 1,01  | 7,53E-01 | 9,00E-01 |
| <i>A_24_P912502</i>    | -1,01 | 7,53E-01 | 9,00E-01 |
| <i>BM561346</i>        | 1,03  | 7,53E-01 | 9,00E-01 |
| <i>HBB</i>             | 1,09  | 7,53E-01 | 9,00E-01 |
| <i>FOS</i>             | -1,08 | 7,53E-01 | 9,00E-01 |
| <i>FCGR2A</i>          | -1,02 | 7,53E-01 | 9,00E-01 |
| <i>CHRNA6</i>          | -1,01 | 7,53E-01 | 9,01E-01 |
| <i>TTF1</i>            | -1,01 | 7,53E-01 | 9,01E-01 |
| <i>RP11-165H20.1</i>   | 1,01  | 7,53E-01 | 9,01E-01 |
| <i>A_24_P367369</i>    | -1,03 | 7,54E-01 | 9,01E-01 |
| <i>BC035647</i>        | -1,02 | 7,54E-01 | 9,01E-01 |
| <i>KIAA0240</i>        | -1,01 | 7,54E-01 | 9,01E-01 |
| <i>EHMT2</i>           | -1,01 | 7,54E-01 | 9,01E-01 |
| <i>PANX3</i>           | -1,01 | 7,54E-01 | 9,01E-01 |
| <i>AF023203</i>        | 1,01  | 7,54E-01 | 9,01E-01 |
| <i>BC038740</i>        | 1,02  | 7,54E-01 | 9,01E-01 |



|                        |       |          |          |
|------------------------|-------|----------|----------|
| <i>EIF4B</i>           | 1,02  | 7,54E-01 | 9,01E-01 |
| <i>KL</i>              | 1,03  | 7,54E-01 | 9,01E-01 |
| <i>C9orf94</i>         | -1,03 | 7,54E-01 | 9,01E-01 |
| <i>RNF40</i>           | 1,01  | 7,54E-01 | 9,01E-01 |
| <i>CST6</i>            | -1,04 | 7,54E-01 | 9,01E-01 |
| <i>DICER1</i>          | 1,01  | 7,54E-01 | 9,01E-01 |
| <i>ODF3</i>            | 1,01  | 7,54E-01 | 9,01E-01 |
| <i>GJA8</i>            | 1,01  | 7,54E-01 | 9,01E-01 |
| <i>A_24_P777185</i>    | 1,02  | 7,54E-01 | 9,01E-01 |
| <i>A_23_P347100</i>    | 1,02  | 7,54E-01 | 9,01E-01 |
| <i>AY117690</i>        | 1,01  | 7,54E-01 | 9,01E-01 |
| <i>FABP5</i>           | -1,08 | 7,54E-01 | 9,01E-01 |
| <i>BF433725</i>        | -1,01 | 7,54E-01 | 9,01E-01 |
| <i>KCNMB1</i>          | -1,05 | 7,55E-01 | 9,01E-01 |
| <i>AI916628</i>        | -1,01 | 7,55E-01 | 9,01E-01 |
| <i>C19orf12</i>        | -1,01 | 7,55E-01 | 9,01E-01 |
| <i>KRT6L</i>           | -1,04 | 7,55E-01 | 9,01E-01 |
| <i>VAT1</i>            | -1,03 | 7,55E-01 | 9,01E-01 |
| <i>C13orf26</i>        | -1,02 | 7,55E-01 | 9,01E-01 |
| <i>FAM64A</i>          | -1,01 | 7,55E-01 | 9,01E-01 |
| <i>HNRPM</i>           | -1,01 | 7,55E-01 | 9,01E-01 |
| <i>RBCK1</i>           | 1,02  | 7,55E-01 | 9,01E-01 |
| <i>A_32_P214860</i>    | 1,05  | 7,55E-01 | 9,01E-01 |
| <i>PHF21B</i>          | 1,06  | 7,55E-01 | 9,01E-01 |
| <i>BE766438</i>        | -1,01 | 7,55E-01 | 9,01E-01 |
| <i>AF318325</i>        | 1,01  | 7,55E-01 | 9,01E-01 |
| <i>THC2336852</i>      | 1,01  | 7,55E-01 | 9,01E-01 |
| <i>AF161370</i>        | -1,01 | 7,55E-01 | 9,01E-01 |
| <i>AK096567</i>        | -1,01 | 7,55E-01 | 9,01E-01 |
| <i>A_32_P214513</i>    | -1,01 | 7,55E-01 | 9,01E-01 |
| <i>A_32_P187143</i>    | 1,01  | 7,55E-01 | 9,01E-01 |
| <i>SMARCA2</i>         | 1,01  | 7,55E-01 | 9,01E-01 |
| <i>AK095964</i>        | 1,01  | 7,55E-01 | 9,01E-01 |
| <i>MMRN1</i>           | 1,04  | 7,55E-01 | 9,01E-01 |
| <i>THC2266610</i>      | 1,04  | 7,55E-01 | 9,01E-01 |
| <i>A_32_P116219</i>    | 1,03  | 7,55E-01 | 9,01E-01 |
| <i>ETG07_105829</i>    | -1,01 | 7,55E-01 | 9,01E-01 |
| <i>THC2400010</i>      | -1,03 | 7,56E-01 | 9,01E-01 |
| <i>A_24_P161773</i>    | -1,01 | 7,56E-01 | 9,01E-01 |
| <i>ENST00000260323</i> | 1,01  | 7,56E-01 | 9,01E-01 |
| <i>LOC255374</i>       | 1,02  | 7,56E-01 | 9,01E-01 |
| <i>AK024224</i>        | -1,02 | 7,56E-01 | 9,02E-01 |
| <i>AK096721</i>        | 1,01  | 7,56E-01 | 9,02E-01 |
| <i>CSNK2A2</i>         | -1,01 | 7,56E-01 | 9,02E-01 |

|                        |       |          |          |
|------------------------|-------|----------|----------|
| <i>FPRL1</i>           | 1,02  | 7,56E-01 | 9,02E-01 |
| <i>ENST00000078131</i> | -1,02 | 7,56E-01 | 9,02E-01 |
| <i>THC2284827</i>      | 1,01  | 7,56E-01 | 9,02E-01 |
| <i>CLDND1</i>          | 1,01  | 7,56E-01 | 9,02E-01 |
| <i>HIST1H3H</i>        | -1,01 | 7,56E-01 | 9,02E-01 |
| <i>ENST00000303257</i> | 1,01  | 7,56E-01 | 9,02E-01 |
| <i>BC061909</i>        | 1,01  | 7,56E-01 | 9,02E-01 |
| <i>BC047111</i>        | -1,01 | 7,57E-01 | 9,02E-01 |
| <i>TTF2</i>            | -1,01 | 7,56E-01 | 9,02E-01 |
| <i>LOC284120</i>       | -1,01 | 7,57E-01 | 9,02E-01 |
| <i>THC2433474</i>      | 1,01  | 7,56E-01 | 9,02E-01 |
| <i>A_24_P942199</i>    | 1,01  | 7,57E-01 | 9,02E-01 |
| <i>ALG14</i>           | 1,02  | 7,56E-01 | 9,02E-01 |
| <i>BE328348</i>        | 1,02  | 7,57E-01 | 9,02E-01 |
| <i>CTHRC1</i>          | 1,04  | 7,56E-01 | 9,02E-01 |
| <i>A_24_P940290</i>    | 1,01  | 7,57E-01 | 9,02E-01 |
| <i>AURKB</i>           | 1,02  | 7,57E-01 | 9,02E-01 |
| <i>NP086850</i>        | -1,01 | 7,57E-01 | 9,02E-01 |
| <i>TSPAN14</i>         | -1,01 | 7,57E-01 | 9,02E-01 |
| <i>ETG10_195139</i>    | -1,01 | 7,57E-01 | 9,02E-01 |
| <i>TMEM28</i>          | -1,02 | 7,57E-01 | 9,02E-01 |
| <i>AK095925</i>        | -1,01 | 7,57E-01 | 9,02E-01 |
| <i>A_24_P229903</i>    | 1,01  | 7,57E-01 | 9,02E-01 |
| <i>A_23_P252501</i>    | 1,01  | 7,57E-01 | 9,02E-01 |
| <i>FLJ12331</i>        | 1,02  | 7,57E-01 | 9,02E-01 |
| <i>CR600271</i>        | -1,01 | 7,57E-01 | 9,02E-01 |
| <i>AK095151</i>        | -1,01 | 7,57E-01 | 9,02E-01 |
| <i>KIAA1045</i>        | -1,01 | 7,57E-01 | 9,02E-01 |
| <i>AGGF1</i>           | -1,01 | 7,57E-01 | 9,02E-01 |
| <i>BG951912</i>        | 1,01  | 7,57E-01 | 9,02E-01 |
| <i>SLC3A2</i>          | 1,01  | 7,57E-01 | 9,02E-01 |
| <i>THC2279275</i>      | 1,01  | 7,57E-01 | 9,02E-01 |
| <i>ITIH5L</i>          | -1,01 | 7,57E-01 | 9,02E-01 |
| <i>AKAP13</i>          | 1,02  | 7,57E-01 | 9,02E-01 |
| <i>ENST00000380357</i> | -1,02 | 7,58E-01 | 9,02E-01 |
| <i>IL17C</i>           | -1,01 | 7,58E-01 | 9,02E-01 |
| <i>A_24_P24150</i>     | -1,03 | 7,58E-01 | 9,02E-01 |
| <i>THC2252745</i>      | -1,01 | 7,58E-01 | 9,02E-01 |
| <i>ENST00000354343</i> | 1,02  | 7,58E-01 | 9,02E-01 |
| <i>BP872463</i>        | -1,01 | 7,58E-01 | 9,02E-01 |
| <i>LOC400590</i>       | -1,01 | 7,58E-01 | 9,03E-01 |
| <i>A_24_P683553</i>    | 1,01  | 7,58E-01 | 9,03E-01 |
| <i>C6orf89</i>         | -1,01 | 7,58E-01 | 9,03E-01 |
| <i>ENST00000335106</i> | -1,03 | 7,58E-01 | 9,03E-01 |

|                 |       |          |          |
|-----------------|-------|----------|----------|
| A_24_P211906    | -1,01 | 7,58E-01 | 9,03E-01 |
| ENST00000340147 | 1,01  | 7,58E-01 | 9,03E-01 |
| CLSTN2          | -1,03 | 7,58E-01 | 9,03E-01 |
| BTBD8           | -1,01 | 7,58E-01 | 9,03E-01 |
| BX373237        | 1,02  | 7,58E-01 | 9,03E-01 |
| C21orf128       | 1,02  | 7,58E-01 | 9,03E-01 |
| PAX5            | 1,01  | 7,58E-01 | 9,03E-01 |
| MNDA            | 1,03  | 7,58E-01 | 9,03E-01 |
| PITX1           | 1,08  | 7,58E-01 | 9,03E-01 |
| CHST13          | -1,01 | 7,58E-01 | 9,03E-01 |
| HEATR2          | -1,01 | 7,58E-01 | 9,03E-01 |
| A_32_P207096    | -1,01 | 7,58E-01 | 9,03E-01 |
| ENST00000376585 | 1,01  | 7,58E-01 | 9,03E-01 |
| A_24_P739582    | 1,02  | 7,58E-01 | 9,03E-01 |
| THC2279466      | -1,04 | 7,59E-01 | 9,03E-01 |
| CD207           | -1,01 | 7,59E-01 | 9,03E-01 |
| FLJ40434        | 1,01  | 7,59E-01 | 9,03E-01 |
| AY358253        | 1,02  | 7,59E-01 | 9,03E-01 |
| THC2323680      | -1,01 | 7,59E-01 | 9,03E-01 |
| A_24_P204604    | 1,01  | 7,59E-01 | 9,03E-01 |
| LOC653056       | -1,02 | 7,59E-01 | 9,03E-01 |
| NALP11          | -1,01 | 7,59E-01 | 9,03E-01 |
| MRPL34          | 1,01  | 7,59E-01 | 9,03E-01 |
| AK000707        | -1,03 | 7,59E-01 | 9,03E-01 |
| AK024293        | -1,01 | 7,59E-01 | 9,03E-01 |
| HUMBINDC        | -1,01 | 7,59E-01 | 9,03E-01 |
| LRRC36          | -1,01 | 7,59E-01 | 9,03E-01 |
| A_24_P585659    | 1,01  | 7,59E-01 | 9,03E-01 |
| KIAA1967        | 1,01  | 7,59E-01 | 9,03E-01 |
| ET              | 1,01  | 7,59E-01 | 9,03E-01 |
| LAS1L           | 1,01  | 7,59E-01 | 9,03E-01 |
| AK000257        | 1,01  | 7,59E-01 | 9,03E-01 |
| A_32_P146320    | -1,01 | 7,59E-01 | 9,03E-01 |
| PDYN            | 1,01  | 7,59E-01 | 9,03E-01 |
| PLXNB3          | 1,02  | 7,59E-01 | 9,03E-01 |
| USP10           | -1,01 | 7,59E-01 | 9,03E-01 |
| A_24_P75700     | 1,01  | 7,59E-01 | 9,03E-01 |
| THC2412723      | 1,01  | 7,59E-01 | 9,03E-01 |
| TMED9           | 1,02  | 7,59E-01 | 9,03E-01 |
| UTS2            | -1,01 | 7,60E-01 | 9,03E-01 |
| FEN1            | -1,01 | 7,60E-01 | 9,03E-01 |
| SEMG2           | -1,01 | 7,60E-01 | 9,03E-01 |
| KIAA1128        | 1,02  | 7,60E-01 | 9,03E-01 |
| LOC255177       | -1,01 | 7,60E-01 | 9,03E-01 |

|                 |       |          |          |
|-----------------|-------|----------|----------|
| CR620567        | -1,01 | 7,60E-01 | 9,03E-01 |
| SERPINA9        | -1,01 | 7,60E-01 | 9,03E-01 |
| A_24_P332532    | -1,01 | 7,60E-01 | 9,04E-01 |
| SH2D1B          | -1,01 | 7,60E-01 | 9,04E-01 |
| TBX6            | -1,01 | 7,60E-01 | 9,04E-01 |
| AA594808        | 1,01  | 7,60E-01 | 9,04E-01 |
| FLJ10241        | 1,01  | 7,60E-01 | 9,04E-01 |
| A_32_P140122    | -1,01 | 7,60E-01 | 9,04E-01 |
| AI637825        | -1,01 | 7,60E-01 | 9,04E-01 |
| A_32_P112401    | -1,04 | 7,61E-01 | 9,04E-01 |
| FAM112B         | -1,02 | 7,60E-01 | 9,04E-01 |
| WDTC1           | 1,01  | 7,60E-01 | 9,04E-01 |
| MGC2889         | 1,01  | 7,60E-01 | 9,04E-01 |
| THC2360841      | 1,08  | 7,60E-01 | 9,04E-01 |
| PAGE1           | -1,01 | 7,61E-01 | 9,04E-01 |
| ETHE1           | 1,01  | 7,61E-01 | 9,04E-01 |
| DEPDC1B         | -1,02 | 7,61E-01 | 9,04E-01 |
| RANBP9          | 1,01  | 7,61E-01 | 9,04E-01 |
| WNT7B           | 1,01  | 7,61E-01 | 9,04E-01 |
| GM2A            | 1,01  | 7,61E-01 | 9,04E-01 |
| SLFN11          | 1,02  | 7,61E-01 | 9,04E-01 |
| AI267321        | -1,03 | 7,61E-01 | 9,04E-01 |
| A_32_P69386     | -1,01 | 7,61E-01 | 9,04E-01 |
| SNX15           | -1,01 | 7,61E-01 | 9,04E-01 |
| THC2423232      | -1,01 | 7,61E-01 | 9,04E-01 |
| BF197320        | 1,02  | 7,61E-01 | 9,04E-01 |
| ABI3BP          | 1,03  | 7,61E-01 | 9,04E-01 |
| CRYBB2          | -1,05 | 7,61E-01 | 9,04E-01 |
| A_32_P25065     | -1,02 | 7,61E-01 | 9,04E-01 |
| BG205572        | -1,01 | 7,61E-01 | 9,04E-01 |
| THC2377294      | 1,01  | 7,61E-01 | 9,04E-01 |
| USP9Y           | 1,01  | 7,61E-01 | 9,04E-01 |
| A_24_P221724    | 1,01  | 7,61E-01 | 9,04E-01 |
| TACC1           | -1,01 | 7,61E-01 | 9,04E-01 |
| ENST00000382838 | -1,02 | 7,62E-01 | 9,04E-01 |
| THC2433066      | -1,02 | 7,62E-01 | 9,04E-01 |
| WDR40A          | -1,01 | 7,62E-01 | 9,04E-01 |
| ESD             | -1,01 | 7,62E-01 | 9,04E-01 |
| PDE8A           | 1,01  | 7,62E-01 | 9,04E-01 |
| A_24_P50139     | 1,01  | 7,62E-01 | 9,04E-01 |
| VDR             | -1,03 | 7,62E-01 | 9,04E-01 |
| A_32_P194740    | -1,01 | 7,62E-01 | 9,04E-01 |
| DYNC1I2         | -1,01 | 7,62E-01 | 9,04E-01 |
| THC2272507      | 1,01  | 7,62E-01 | 9,04E-01 |

|                        |       |          |          |
|------------------------|-------|----------|----------|
| <i>ANKRD2</i>          | 1,02  | 7,62E-01 | 9,04E-01 |
| <i>KIAA0101</i>        | -1,04 | 7,62E-01 | 9,04E-01 |
| <i>TMEFF1</i>          | -1,01 | 7,62E-01 | 9,04E-01 |
| <i>A_24_P944597</i>    | 1,01  | 7,62E-01 | 9,04E-01 |
| <i>THC2408559</i>      | 1,02  | 7,62E-01 | 9,04E-01 |
| <i>THC2374690</i>      | -1,01 | 7,62E-01 | 9,04E-01 |
| <i>FHOD1</i>           | 1,02  | 7,62E-01 | 9,04E-01 |
| <i>NINJ2</i>           | -1,02 | 7,62E-01 | 9,04E-01 |
| <i>A_24_P289130</i>    | -1,01 | 7,62E-01 | 9,04E-01 |
| <i>MBNL3</i>           | -1,01 | 7,62E-01 | 9,04E-01 |
| <i>UHMK1</i>           | -1,01 | 7,62E-01 | 9,04E-01 |
| <i>BI826226</i>        | 1,01  | 7,62E-01 | 9,04E-01 |
| <i>BX098326</i>        | 1,01  | 7,62E-01 | 9,04E-01 |
| <i>C1orf100</i>        | 1,01  | 7,62E-01 | 9,04E-01 |
| <i>ANXA7</i>           | 1,01  | 7,62E-01 | 9,04E-01 |
| <i>A_24_P280953</i>    | 1,02  | 7,62E-01 | 9,04E-01 |
| <i>A_24_P932168</i>    | 1,03  | 7,62E-01 | 9,04E-01 |
| <i>OR51B5</i>          | 1,01  | 7,62E-01 | 9,04E-01 |
| <i>THC2283890</i>      | -1,01 | 7,63E-01 | 9,05E-01 |
| <i>FLJ32658</i>        | -1,01 | 7,63E-01 | 9,05E-01 |
| <i>NT5C2</i>           | -1,01 | 7,63E-01 | 9,05E-01 |
| <i>DOCK3</i>           | -1,02 | 7,63E-01 | 9,05E-01 |
| <i>NOX4</i>            | -1,03 | 7,63E-01 | 9,05E-01 |
| <i>A_24_P510515</i>    | -1,01 | 7,63E-01 | 9,05E-01 |
| <i>A_32_P7105</i>      | 1,01  | 7,63E-01 | 9,05E-01 |
| <i>A_24_P911644</i>    | 1,01  | 7,63E-01 | 9,05E-01 |
| <i>C1orf76</i>         | 1,01  | 7,63E-01 | 9,05E-01 |
| <i>THC2285366</i>      | -1,01 | 7,63E-01 | 9,05E-01 |
| <i>ENST00000252509</i> | -1,03 | 7,63E-01 | 9,05E-01 |
| <i>A_24_P323795</i>    | -1,01 | 7,63E-01 | 9,05E-01 |
| <i>DNMT3L</i>          | -1,01 | 7,63E-01 | 9,05E-01 |
| <i>THC2377971</i>      | -1,04 | 7,64E-01 | 9,05E-01 |
| <i>EIF2AK3</i>         | -1,03 | 7,64E-01 | 9,05E-01 |
| <i>GPR144</i>          | -1,02 | 7,64E-01 | 9,05E-01 |
| <i>CHID1</i>           | -1,02 | 7,64E-01 | 9,05E-01 |
| <i>HHAT</i>            | -1,02 | 7,64E-01 | 9,05E-01 |
| <i>HYOU1</i>           | -1,01 | 7,64E-01 | 9,05E-01 |
| <i>EVC</i>             | -1,01 | 7,63E-01 | 9,05E-01 |
| <i>PRAP1</i>           | -1,01 | 7,64E-01 | 9,05E-01 |
| <i>C21orf29</i>        | -1,01 | 7,64E-01 | 9,05E-01 |
| <i>TBX22</i>           | -1,01 | 7,64E-01 | 9,05E-01 |
| <i>GDPD2</i>           | -1,01 | 7,63E-01 | 9,05E-01 |
| <i>LOC647353</i>       | -1,01 | 7,64E-01 | 9,05E-01 |
| <i>CNR2</i>            | -1,01 | 7,64E-01 | 9,05E-01 |

|                 |       |          |          |
|-----------------|-------|----------|----------|
| AA703521        | -1,01 | 7,64E-01 | 9,05E-01 |
| THC2377230      | -1,01 | 7,63E-01 | 9,05E-01 |
| AZU1            | 1,01  | 7,63E-01 | 9,05E-01 |
| ARPC3           | 1,01  | 7,64E-01 | 9,05E-01 |
| PIGH            | 1,01  | 7,64E-01 | 9,05E-01 |
| ZSCAN1          | 1,01  | 7,64E-01 | 9,05E-01 |
| ENST00000327928 | 1,01  | 7,64E-01 | 9,05E-01 |
| A_24_P919256    | 1,01  | 7,64E-01 | 9,05E-01 |
| AF090908        | 1,01  | 7,64E-01 | 9,05E-01 |
| A_24_P33055     | 1,01  | 7,64E-01 | 9,05E-01 |
| NP274062        | 1,01  | 7,64E-01 | 9,05E-01 |
| ALDOC           | 1,02  | 7,64E-01 | 9,05E-01 |
| BC087732        | 1,02  | 7,64E-01 | 9,05E-01 |
| A_32_P183001    | 1,02  | 7,64E-01 | 9,05E-01 |
| A_24_P256093    | 1,02  | 7,64E-01 | 9,05E-01 |
| A_32_P113404    | 1,03  | 7,63E-01 | 9,05E-01 |
| PRSS23          | 1,04  | 7,64E-01 | 9,05E-01 |
| A_24_P925442    | 1,01  | 7,64E-01 | 9,05E-01 |
| HBA1            | 1,06  | 7,64E-01 | 9,05E-01 |
| LOC439914       | -1,01 | 7,64E-01 | 9,05E-01 |
| THC2314215      | 1,01  | 7,64E-01 | 9,05E-01 |
| SIRPB2          | -1,01 | 7,64E-01 | 9,05E-01 |
| THC2315901      | 1,01  | 7,64E-01 | 9,05E-01 |
| ENST00000251170 | 1,02  | 7,64E-01 | 9,05E-01 |
| OGDHL           | -1,07 | 7,65E-01 | 9,05E-01 |
| AK092508        | -1,01 | 7,65E-01 | 9,05E-01 |
| AF130105        | -1,01 | 7,65E-01 | 9,05E-01 |
| TRIM33          | -1,01 | 7,65E-01 | 9,05E-01 |
| ENST00000336999 | 1,01  | 7,65E-01 | 9,05E-01 |
| S100A14         | -1,13 | 7,65E-01 | 9,05E-01 |
| EXPH5           | -1,03 | 7,65E-01 | 9,05E-01 |
| A_24_P7322      | -1,01 | 7,65E-01 | 9,05E-01 |
| RPS4Y1          | -1,01 | 7,65E-01 | 9,05E-01 |
| DIRAS2          | -1,01 | 7,65E-01 | 9,05E-01 |
| AK056031        | 1,01  | 7,65E-01 | 9,05E-01 |
| ARHGAP8         | 1,01  | 7,65E-01 | 9,05E-01 |
| KLK5            | -1,05 | 7,65E-01 | 9,05E-01 |
| A_24_P152753    | -1,02 | 7,65E-01 | 9,05E-01 |
| NME1            | 1,02  | 7,65E-01 | 9,05E-01 |
| SYMPK           | -1,01 | 7,65E-01 | 9,05E-01 |
| C3orf40         | 1,02  | 7,65E-01 | 9,05E-01 |
| SPRR1B          | 1,17  | 7,65E-01 | 9,05E-01 |
| THC2379561      | -1,01 | 7,66E-01 | 9,06E-01 |
| THC2354272      | -1,01 | 7,66E-01 | 9,06E-01 |

|                        |       |          |          |
|------------------------|-------|----------|----------|
| <i>MRGPRX2</i>         | 1,01  | 7,66E-01 | 9,06E-01 |
| <i>SMURF2</i>          | 1,01  | 7,66E-01 | 9,06E-01 |
| <i>A_24_P935852</i>    | 1,01  | 7,66E-01 | 9,06E-01 |
| <i>ENST00000381475</i> | -1,01 | 7,66E-01 | 9,06E-01 |
| <i>LOC390705</i>       | -1,01 | 7,66E-01 | 9,06E-01 |
| <i>MAPBPIP</i>         | -1,01 | 7,66E-01 | 9,06E-01 |
| <i>LOC84661</i>        | -1,01 | 7,66E-01 | 9,06E-01 |
| <i>WIPI1</i>           | 1,02  | 7,66E-01 | 9,06E-01 |
| <i>AF116687</i>        | 1,01  | 7,67E-01 | 9,06E-01 |
| <i>AK002005</i>        | 1,01  | 7,67E-01 | 9,06E-01 |
| <i>SH3TC1</i>          | 1,01  | 7,67E-01 | 9,06E-01 |
| <i>AF119913</i>        | 1,02  | 7,67E-01 | 9,06E-01 |
| <i>THC2452527</i>      | -1,01 | 7,67E-01 | 9,06E-01 |
| <i>AU145544</i>        | 1,02  | 7,67E-01 | 9,06E-01 |
| <i>THC2381032</i>      | -1,02 | 7,67E-01 | 9,07E-01 |
| <i>AURKC</i>           | 1,01  | 7,67E-01 | 9,07E-01 |
| <i>A_23_P113762</i>    | 1,02  | 7,67E-01 | 9,07E-01 |
| <i>STH</i>             | 1,02  | 7,67E-01 | 9,07E-01 |
| <i>SPRY4</i>           | 1,02  | 7,67E-01 | 9,07E-01 |
| <i>INCA</i>            | -1,02 | 7,67E-01 | 9,07E-01 |
| <i>TBC1D9</i>          | -1,02 | 7,67E-01 | 9,07E-01 |
| <i>AK057233</i>        | -1,03 | 7,67E-01 | 9,07E-01 |
| <i>PTPRN</i>           | -1,01 | 7,67E-01 | 9,07E-01 |
| <i>THC2375058</i>      | -1,01 | 7,67E-01 | 9,07E-01 |
| <i>A_32_P42137</i>     | 1,01  | 7,67E-01 | 9,07E-01 |
| <i>BC063641</i>        | -1,03 | 7,67E-01 | 9,07E-01 |
| <i>NP102221</i>        | -1,01 | 7,67E-01 | 9,07E-01 |
| <i>GCET2</i>           | -1,01 | 7,67E-01 | 9,07E-01 |
| <i>GRP</i>             | 1,03  | 7,67E-01 | 9,07E-01 |
| <i>ENST00000332666</i> | -1,01 | 7,67E-01 | 9,07E-01 |
| <i>SNTB2</i>           | 1,01  | 7,67E-01 | 9,07E-01 |
| <i>ROBO2</i>           | 1,02  | 7,67E-01 | 9,07E-01 |
| <i>RPLP0</i>           | -1,01 | 7,68E-01 | 9,07E-01 |
| <i>AK130930</i>        | 1,01  | 7,68E-01 | 9,07E-01 |
| <i>A_24_P694998</i>    | -1,01 | 7,68E-01 | 9,07E-01 |
| <i>CR626044</i>        | -1,01 | 7,68E-01 | 9,07E-01 |
| <i>DPM1</i>            | 1,01  | 7,68E-01 | 9,07E-01 |
| <i>BX248748</i>        | 1,02  | 7,68E-01 | 9,07E-01 |
| <i>THC2382287</i>      | 1,01  | 7,68E-01 | 9,07E-01 |
| <i>C9orf47</i>         | -1,03 | 7,68E-01 | 9,07E-01 |
| <i>ENST00000376238</i> | -1,01 | 7,68E-01 | 9,07E-01 |
| <i>MTA3</i>            | 1,01  | 7,68E-01 | 9,08E-01 |
| <i>CN333321</i>        | 1,01  | 7,68E-01 | 9,08E-01 |
| <i>HNRNPG-T</i>        | 1,02  | 7,69E-01 | 9,08E-01 |

|                     |       |          |          |
|---------------------|-------|----------|----------|
| <i>KIAA1211</i>     | -1,03 | 7,69E-01 | 9,08E-01 |
| <i>WDR51B</i>       | 1,01  | 7,69E-01 | 9,08E-01 |
| <i>A_24_P924791</i> | -1,01 | 7,69E-01 | 9,08E-01 |
| <i>BG004487</i>     | 1,01  | 7,69E-01 | 9,08E-01 |
| <i>AF116689</i>     | 1,01  | 7,69E-01 | 9,08E-01 |
| <i>B3GNT4</i>       | 1,01  | 7,69E-01 | 9,08E-01 |
| <i>AK2</i>          | 1,01  | 7,69E-01 | 9,08E-01 |
| <i>THC2267012</i>   | 1,01  | 7,69E-01 | 9,08E-01 |
| <i>THC2341091</i>   | 1,01  | 7,69E-01 | 9,08E-01 |
| <i>C9orf114</i>     | 1,01  | 7,69E-01 | 9,08E-01 |
| <i>TEX2</i>         | 1,01  | 7,69E-01 | 9,08E-01 |
| <i>A_24_P101601</i> | 1,04  | 7,69E-01 | 9,08E-01 |
| <i>ESR2</i>         | 1,01  | 7,69E-01 | 9,08E-01 |
| <i>A_24_P868905</i> | -1,02 | 7,69E-01 | 9,08E-01 |
| <i>RRS1</i>         | -1,02 | 7,69E-01 | 9,08E-01 |
| <i>RNASE8</i>       | -1,01 | 7,69E-01 | 9,08E-01 |
| <i>SPATA22</i>      | -1,02 | 7,69E-01 | 9,08E-01 |
| <i>TNFAIP2</i>      | 1,03  | 7,69E-01 | 9,08E-01 |
| <i>PLCE1</i>        | 1,02  | 7,69E-01 | 9,08E-01 |
| <i>RHBDL2</i>       | -1,02 | 7,70E-01 | 9,08E-01 |
| <i>THC2429896</i>   | -1,01 | 7,70E-01 | 9,08E-01 |
| <i>HCG18</i>        | -1,01 | 7,70E-01 | 9,08E-01 |
| <i>NDUFA2</i>       | 1,01  | 7,70E-01 | 9,08E-01 |
| <i>AK094447</i>     | 1,01  | 7,70E-01 | 9,08E-01 |
| <i>FGB</i>          | 1,01  | 7,70E-01 | 9,08E-01 |
| <i>MTHFR</i>        | 1,01  | 7,70E-01 | 9,08E-01 |
| <i>CGGBP1</i>       | 1,01  | 7,70E-01 | 9,08E-01 |
| <i>ZNF615</i>       | 1,02  | 7,70E-01 | 9,08E-01 |
| <i>DYNC111</i>      | 1,03  | 7,70E-01 | 9,08E-01 |
| <i>SLC30A8</i>      | 1,01  | 7,70E-01 | 9,08E-01 |
| <i>INHBE</i>        | 1,01  | 7,70E-01 | 9,08E-01 |
| <i>LOC283487</i>    | 1,02  | 7,70E-01 | 9,08E-01 |
| <i>A_24_P920139</i> | -1,01 | 7,70E-01 | 9,08E-01 |
| <i>BAZ2A</i>        | -1,01 | 7,70E-01 | 9,08E-01 |
| <i>BC040596</i>     | -1,01 | 7,70E-01 | 9,08E-01 |
| <i>AK026465</i>     | -1,01 | 7,70E-01 | 9,08E-01 |
| <i>THOC7</i>        | -1,01 | 7,70E-01 | 9,08E-01 |
| <i>GTF3C1</i>       | 1,01  | 7,70E-01 | 9,08E-01 |
| <i>BG151149</i>     | 1,01  | 7,70E-01 | 9,08E-01 |
| <i>THC2405331</i>   | 1,01  | 7,70E-01 | 9,08E-01 |
| <i>PRIMA1</i>       | -1,01 | 7,70E-01 | 9,08E-01 |
| <i>FBXO11</i>       | 1,01  | 7,71E-01 | 9,09E-01 |
| <i>UTP14A</i>       | 1,01  | 7,71E-01 | 9,09E-01 |
| <i>ERH</i>          | 1,01  | 7,71E-01 | 9,09E-01 |



|                        |       |          |          |
|------------------------|-------|----------|----------|
| <i>ENST00000298189</i> | -1,01 | 7,71E-01 | 9,09E-01 |
| <i>SIGIRR</i>          | -1,02 | 7,71E-01 | 9,09E-01 |
| <i>THC2373712</i>      | 1,02  | 7,71E-01 | 9,09E-01 |
| <i>AF144054</i>        | 1,02  | 7,71E-01 | 9,09E-01 |
| <i>NP659946</i>        | -1,01 | 7,71E-01 | 9,09E-01 |
| <i>WNT8A</i>           | -1,01 | 7,71E-01 | 9,09E-01 |
| <i>C19orf23</i>        | 1,01  | 7,71E-01 | 9,09E-01 |
| <i>LOC205251</i>       | 1,02  | 7,71E-01 | 9,09E-01 |
| <i>BTG1</i>            | -1,02 | 7,71E-01 | 9,09E-01 |
| <i>UGT3A1</i>          | -1,01 | 7,71E-01 | 9,09E-01 |
| <i>A_24_P50666</i>     | 1,03  | 7,71E-01 | 9,09E-01 |
| <i>ZNF80</i>           | 1,01  | 7,71E-01 | 9,09E-01 |
| <i>RAG1AP1</i>         | 1,02  | 7,71E-01 | 9,09E-01 |
| <i>FAM105A</i>         | 1,03  | 7,71E-01 | 9,09E-01 |
| <i>BG210655</i>        | 1,01  | 7,71E-01 | 9,09E-01 |
| <i>TM4SF19</i>         | 1,01  | 7,71E-01 | 9,09E-01 |
| <i>BX640843</i>        | -1,03 | 7,71E-01 | 9,09E-01 |
| <i>TLL1</i>            | -1,01 | 7,72E-01 | 9,09E-01 |
| <i>HOMER1</i>          | 1,02  | 7,72E-01 | 9,09E-01 |
| <i>BC042946</i>        | 1,01  | 7,72E-01 | 9,09E-01 |
| <i>BC037838</i>        | -1,11 | 7,72E-01 | 9,09E-01 |
| <i>MMP25</i>           | -1,03 | 7,72E-01 | 9,09E-01 |
| <i>MOCS2</i>           | 1,01  | 7,72E-01 | 9,09E-01 |
| <i>THC2432735</i>      | -1,02 | 7,72E-01 | 9,09E-01 |
| <i>LY6K</i>            | 1,03  | 7,72E-01 | 9,09E-01 |
| <i>AF113010</i>        | -1,01 | 7,72E-01 | 9,09E-01 |
| <i>BX645706</i>        | 1,01  | 7,72E-01 | 9,09E-01 |
| <i>SLC7A2</i>          | 1,02  | 7,72E-01 | 9,09E-01 |
| <i>BU679059</i>        | 1,01  | 7,72E-01 | 9,09E-01 |
| <i>INGX</i>            | -1,01 | 7,72E-01 | 9,09E-01 |
| <i>TOP1MT</i>          | -1,02 | 7,72E-01 | 9,09E-01 |
| <i>GJB6</i>            | -1,06 | 7,72E-01 | 9,09E-01 |
| <i>SLC24A6</i>         | -1,01 | 7,72E-01 | 9,09E-01 |
| <i>LOC202347</i>       | -1,01 | 7,73E-01 | 9,10E-01 |
| <i>OR7E91P</i>         | -1,01 | 7,73E-01 | 9,10E-01 |
| <i>PSMB2</i>           | -1,01 | 7,73E-01 | 9,10E-01 |
| <i>AK123703</i>        | 1,01  | 7,73E-01 | 9,10E-01 |
| <i>BF972140</i>        | 1,01  | 7,73E-01 | 9,10E-01 |
| <i>AMPD2</i>           | -1,02 | 7,73E-01 | 9,10E-01 |
| <i>SALF</i>            | -1,06 | 7,73E-01 | 9,10E-01 |
| <i>KIAA1257</i>        | -1,01 | 7,73E-01 | 9,10E-01 |
| <i>ORC2L</i>           | -1,01 | 7,73E-01 | 9,10E-01 |
| <i>ENST00000301701</i> | 1,01  | 7,73E-01 | 9,10E-01 |
| <i>A_23_P6101</i>      | 1,01  | 7,73E-01 | 9,10E-01 |

|                        |       |          |          |
|------------------------|-------|----------|----------|
| <i>FNDC6</i>           | 1,06  | 7,73E-01 | 9,10E-01 |
| <i>A_24_P625683</i>    | -1,02 | 7,73E-01 | 9,10E-01 |
| <i>LOC157860</i>       | 1,01  | 7,73E-01 | 9,10E-01 |
| <i>AF119886</i>        | -1,01 | 7,73E-01 | 9,10E-01 |
| <i>A_24_P914859</i>    | 1,01  | 7,73E-01 | 9,10E-01 |
| <i>AA233255</i>        | 1,01  | 7,73E-01 | 9,10E-01 |
| <i>CPA1</i>            | 1,02  | 7,73E-01 | 9,10E-01 |
| <i>THC2345778</i>      | -1,04 | 7,73E-01 | 9,10E-01 |
| <i>UGT2A1</i>          | 1,01  | 7,73E-01 | 9,10E-01 |
| <i>THC2314566</i>      | -1,01 | 7,74E-01 | 9,10E-01 |
| <i>WDR39</i>           | 1,01  | 7,74E-01 | 9,10E-01 |
| <i>APOL4</i>           | 1,01  | 7,73E-01 | 9,10E-01 |
| <i>RPLP1</i>           | -1,02 | 7,74E-01 | 9,10E-01 |
| <i>THC2322808</i>      | -1,01 | 7,74E-01 | 9,10E-01 |
| <i>CCDC62</i>          | 1,01  | 7,74E-01 | 9,10E-01 |
| <i>BC036435</i>        | 1,02  | 7,74E-01 | 9,10E-01 |
| <i>ADAT1</i>           | -1,01 | 7,74E-01 | 9,10E-01 |
| <i>AL117621</i>        | -1,02 | 7,74E-01 | 9,10E-01 |
| <i>GNG7</i>            | 1,03  | 7,74E-01 | 9,10E-01 |
| <i>LOC284260</i>       | -1,02 | 7,74E-01 | 9,10E-01 |
| <i>PLCZ1</i>           | -1,01 | 7,74E-01 | 9,10E-01 |
| <i>COL1A2</i>          | -1,04 | 7,74E-01 | 9,10E-01 |
| <i>UGT1A6</i>          | -1,01 | 7,74E-01 | 9,10E-01 |
| <i>THC2407877</i>      | -1,01 | 7,74E-01 | 9,10E-01 |
| <i>ZNF488</i>          | -1,01 | 7,74E-01 | 9,10E-01 |
| <i>BX101632</i>        | 1,01  | 7,74E-01 | 9,10E-01 |
| <i>XAGE2</i>           | -1,03 | 7,75E-01 | 9,10E-01 |
| <i>OVOL2</i>           | -1,02 | 7,74E-01 | 9,10E-01 |
| <i>ENST00000374049</i> | -1,02 | 7,74E-01 | 9,10E-01 |
| <i>BX104098</i>        | -1,01 | 7,75E-01 | 9,10E-01 |
| <i>PDXP</i>            | -1,01 | 7,75E-01 | 9,10E-01 |
| <i>BF688944</i>        | -1,01 | 7,74E-01 | 9,10E-01 |
| <i>KIF22</i>           | -1,01 | 7,75E-01 | 9,10E-01 |
| <i>RP11-56A21.1</i>    | 1,01  | 7,75E-01 | 9,10E-01 |
| <i>LOC200312</i>       | 1,01  | 7,74E-01 | 9,10E-01 |
| <i>SSTR4</i>           | 1,01  | 7,74E-01 | 9,10E-01 |
| <i>THC2387148</i>      | 1,01  | 7,75E-01 | 9,10E-01 |
| <i>HIST1H4B</i>        | 1,02  | 7,75E-01 | 9,10E-01 |
| <i>A_23_P62857</i>     | 1,05  | 7,75E-01 | 9,10E-01 |
| <i>A_24_P93452</i>     | -1,05 | 7,75E-01 | 9,11E-01 |
| <i>A_24_P204165</i>    | -1,04 | 7,75E-01 | 9,11E-01 |
| <i>OCLN</i>            | -1,03 | 7,75E-01 | 9,11E-01 |
| <i>A_24_P33213</i>     | -1,02 | 7,75E-01 | 9,11E-01 |
| <i>FBXL14</i>          | -1,01 | 7,75E-01 | 9,11E-01 |

|                        |       |          |          |
|------------------------|-------|----------|----------|
| <i>THC2370399</i>      | -1,01 | 7,75E-01 | 9,11E-01 |
| <i>AA704487</i>        | -1,01 | 7,75E-01 | 9,11E-01 |
| <i>SLC7A13</i>         | 1,01  | 7,75E-01 | 9,11E-01 |
| <i>RIMS1</i>           | 1,01  | 7,75E-01 | 9,11E-01 |
| <i>ELA1</i>            | 1,01  | 7,75E-01 | 9,11E-01 |
| <i>ENST00000339437</i> | 1,01  | 7,75E-01 | 9,11E-01 |
| <i>AA126789</i>        | 1,01  | 7,75E-01 | 9,11E-01 |
| <i>LOC387758</i>       | 1,03  | 7,75E-01 | 9,11E-01 |
| <i>AK055214</i>        | 1,03  | 7,75E-01 | 9,11E-01 |
| <i>LOC285441</i>       | -1,01 | 7,75E-01 | 9,11E-01 |
| <i>A_32_P193952</i>    | -1,01 | 7,75E-01 | 9,11E-01 |
| <i>BM979049</i>        | -1,02 | 7,75E-01 | 9,11E-01 |
| <i>R78584</i>          | -1,01 | 7,75E-01 | 9,11E-01 |
| <i>USP40</i>           | -1,01 | 7,75E-01 | 9,11E-01 |
| <i>FECH</i>            | 1,01  | 7,75E-01 | 9,11E-01 |
| <i>VMD2</i>            | 1,01  | 7,75E-01 | 9,11E-01 |
| <i>THC2411433</i>      | -1,04 | 7,76E-01 | 9,11E-01 |
| <i>RHO</i>             | -1,03 | 7,76E-01 | 9,11E-01 |
| <i>A_23_P393495</i>    | -1,01 | 7,76E-01 | 9,11E-01 |
| <i>A_24_P75778</i>     | 1,03  | 7,76E-01 | 9,11E-01 |
| <i>NRXN3</i>           | 1,03  | 7,76E-01 | 9,11E-01 |
| <i>TM2D1</i>           | -1,01 | 7,76E-01 | 9,11E-01 |
| <i>AI376865</i>        | 1,02  | 7,76E-01 | 9,11E-01 |
| <i>CARD10</i>          | -1,02 | 7,76E-01 | 9,11E-01 |
| <i>STAG2</i>           | -1,01 | 7,76E-01 | 9,11E-01 |
| <i>CR600585</i>        | -1,01 | 7,76E-01 | 9,11E-01 |
| <i>LOC151438</i>       | 1,01  | 7,76E-01 | 9,11E-01 |
| <i>A_24_P942760</i>    | 1,01  | 7,76E-01 | 9,11E-01 |
| <i>STAU1</i>           | 1,01  | 7,76E-01 | 9,11E-01 |
| <i>A_24_P808579</i>    | -1,01 | 7,76E-01 | 9,11E-01 |
| <i>FLJ11151</i>        | -1,02 | 7,76E-01 | 9,11E-01 |
| <i>BX115105</i>        | -1,02 | 7,76E-01 | 9,11E-01 |
| <i>C4orf27</i>         | -1,01 | 7,76E-01 | 9,11E-01 |
| <i>AT_D_3</i>          | 1,01  | 7,76E-01 | 9,11E-01 |
| <i>T19827</i>          | 1,01  | 7,76E-01 | 9,11E-01 |
| <i>FLJ22659</i>        | 1,01  | 7,76E-01 | 9,11E-01 |
| <i>RAB4B</i>           | 1,01  | 7,76E-01 | 9,11E-01 |
| <i>SPATA3</i>          | 1,01  | 7,76E-01 | 9,11E-01 |
| <i>CHMP4B</i>          | 1,01  | 7,76E-01 | 9,11E-01 |
| <i>PIK4CA</i>          | -1,01 | 7,77E-01 | 9,11E-01 |
| <i>A_24_P521662</i>    | -1,02 | 7,77E-01 | 9,11E-01 |
| <i>NCKIPSD</i>         | -1,01 | 7,77E-01 | 9,11E-01 |
| <i>DDAH2</i>           | 1,01  | 7,77E-01 | 9,11E-01 |
| <i>NARFL</i>           | 1,01  | 7,77E-01 | 9,11E-01 |

|                        |       |          |          |
|------------------------|-------|----------|----------|
| <i>IGFBP2</i>          | -1,02 | 7,77E-01 | 9,11E-01 |
| <i>C15orf42</i>        | 1,01  | 7,77E-01 | 9,11E-01 |
| <i>A_24_P453865</i>    | 1,03  | 7,77E-01 | 9,11E-01 |
| <i>TTN</i>             | -1,02 | 7,77E-01 | 9,11E-01 |
| <i>A_24_P144680</i>    | -1,01 | 7,77E-01 | 9,11E-01 |
| <i>CLGN</i>            | 1,01  | 7,77E-01 | 9,11E-01 |
| <i>A_24_P238427</i>    | -1,03 | 7,77E-01 | 9,11E-01 |
| <i>ABO61718</i>        | -1,02 | 7,77E-01 | 9,11E-01 |
| <i>A_24_P481301</i>    | -1,01 | 7,77E-01 | 9,11E-01 |
| <i>C12orf42</i>        | -1,01 | 7,77E-01 | 9,11E-01 |
| <i>ORC1L</i>           | -1,01 | 7,77E-01 | 9,11E-01 |
| <i>SLC9A6</i>          | -1,01 | 7,77E-01 | 9,11E-01 |
| <i>A_23_P136595</i>    | 1,01  | 7,77E-01 | 9,11E-01 |
| <i>C9orf140</i>        | 1,01  | 7,77E-01 | 9,11E-01 |
| <i>CLIC2</i>           | 1,02  | 7,77E-01 | 9,11E-01 |
| <i>IL17B</i>           | 1,03  | 7,77E-01 | 9,12E-01 |
| <i>CD612636</i>        | 1,01  | 7,78E-01 | 9,12E-01 |
| <i>THC2283344</i>      | 1,01  | 7,78E-01 | 9,12E-01 |
| <i>THC2271663</i>      | -1,03 | 7,78E-01 | 9,12E-01 |
| <i>HK1</i>             | -1,02 | 7,78E-01 | 9,12E-01 |
| <i>CASC5</i>           | 1,01  | 7,78E-01 | 9,12E-01 |
| <i>A_24_P916992</i>    | 1,01  | 7,78E-01 | 9,12E-01 |
| <i>OR4C46</i>          | -1,01 | 7,78E-01 | 9,12E-01 |
| <i>A_24_P526638</i>    | -1,01 | 7,78E-01 | 9,12E-01 |
| <i>CACNG7</i>          | -1,01 | 7,78E-01 | 9,12E-01 |
| <i>STIM1</i>           | 1,01  | 7,78E-01 | 9,12E-01 |
| <i>CNTNAP5</i>         | 1,01  | 7,78E-01 | 9,12E-01 |
| <i>THC2377328</i>      | -1,02 | 7,78E-01 | 9,12E-01 |
| <i>CKB</i>             | -1,02 | 7,78E-01 | 9,12E-01 |
| <i>A_23_P22086</i>     | -1,02 | 7,78E-01 | 9,12E-01 |
| <i>AK023647</i>        | -1,02 | 7,78E-01 | 9,12E-01 |
| <i>THC2345721</i>      | -1,01 | 7,78E-01 | 9,12E-01 |
| <i>AL137542</i>        | -1,01 | 7,78E-01 | 9,12E-01 |
| <i>ENST00000330710</i> | -1,01 | 7,78E-01 | 9,12E-01 |
| <i>TPH2</i>            | 1,01  | 7,78E-01 | 9,12E-01 |
| <i>TRPC4AP</i>         | 1,01  | 7,78E-01 | 9,12E-01 |
| <i>A_32_P1869</i>      | 1,01  | 7,78E-01 | 9,12E-01 |
| <i>PSMB8</i>           | 1,01  | 7,78E-01 | 9,12E-01 |
| <i>RBMX2</i>           | 1,01  | 7,78E-01 | 9,12E-01 |
| <i>COL14A1</i>         | 1,03  | 7,78E-01 | 9,12E-01 |
| <i>ANKRD22</i>         | 1,05  | 7,79E-01 | 9,12E-01 |
| <i>DMAP1</i>           | 1,01  | 7,79E-01 | 9,12E-01 |
| <i>AFTPH</i>           | -1,01 | 7,79E-01 | 9,12E-01 |
| <i>A_24_P33385</i>     | -1,06 | 7,79E-01 | 9,12E-01 |

|                        |       |          |          |
|------------------------|-------|----------|----------|
| <i>ENST00000349097</i> | -1,01 | 7,79E-01 | 9,12E-01 |
| <i>C19orf41</i>        | -1,01 | 7,79E-01 | 9,12E-01 |
| <i>A_32_P218823</i>    | -1,01 | 7,79E-01 | 9,12E-01 |
| <i>AK022067</i>        | -1,01 | 7,79E-01 | 9,12E-01 |
| <i>CD300LB</i>         | -1,01 | 7,79E-01 | 9,12E-01 |
| <i>LRRTM3</i>          | -1,01 | 7,79E-01 | 9,12E-01 |
| <i>CCNJ</i>            | 1,01  | 7,79E-01 | 9,12E-01 |
| <i>SLC30A4</i>         | 1,01  | 7,79E-01 | 9,12E-01 |
| <i>CCDC120</i>         | 1,02  | 7,79E-01 | 9,12E-01 |
| <i>A_24_P935417</i>    | 1,01  | 7,79E-01 | 9,12E-01 |
| <i>ENST00000265073</i> | -1,01 | 7,79E-01 | 9,12E-01 |
| <i>FAM89B</i>          | -1,01 | 7,79E-01 | 9,12E-01 |
| <i>XRCC6</i>           | -1,01 | 7,79E-01 | 9,12E-01 |
| <i>T07777</i>          | 1,01  | 7,79E-01 | 9,12E-01 |
| <i>ADAMTS14</i>        | 1,01  | 7,79E-01 | 9,12E-01 |
| <i>GARNL4</i>          | 1,03  | 7,79E-01 | 9,12E-01 |
| <i>THC2325987</i>      | -1,02 | 7,79E-01 | 9,12E-01 |
| <i>C1orf170</i>        | 1,02  | 7,79E-01 | 9,12E-01 |
| <i>MRPL50</i>          | -1,01 | 7,79E-01 | 9,12E-01 |
| <i>T26612</i>          | -1,03 | 7,79E-01 | 9,12E-01 |
| <i>C11orf24</i>        | -1,02 | 7,79E-01 | 9,12E-01 |
| <i>VCX3A</i>           | -1,01 | 7,79E-01 | 9,12E-01 |
| <i>AK123861</i>        | -1,03 | 7,80E-01 | 9,12E-01 |
| <i>LOC124446</i>       | -1,01 | 7,80E-01 | 9,12E-01 |
| <i>MRPL22</i>          | -1,01 | 7,80E-01 | 9,12E-01 |
| <i>AF268617</i>        | -1,01 | 7,80E-01 | 9,12E-01 |
| <i>THC2432550</i>      | -1,01 | 7,80E-01 | 9,12E-01 |
| <i>ST8SIA3</i>         | -1,01 | 7,80E-01 | 9,12E-01 |
| <i>OLFM3</i>           | -1,01 | 7,80E-01 | 9,12E-01 |
| <i>TSEN54</i>          | 1,01  | 7,80E-01 | 9,12E-01 |
| <i>MGC16075</i>        | 1,01  | 7,80E-01 | 9,12E-01 |
| <i>AF090355</i>        | 1,01  | 7,80E-01 | 9,12E-01 |
| <i>FLJ23152</i>        | 1,01  | 7,80E-01 | 9,12E-01 |
| <i>CB049726</i>        | 1,01  | 7,80E-01 | 9,12E-01 |
| <i>A_24_P942974</i>    | 1,01  | 7,80E-01 | 9,12E-01 |
| <i>SLC22A17</i>        | 1,01  | 7,80E-01 | 9,12E-01 |
| <i>LOC645499</i>       | 1,01  | 7,80E-01 | 9,12E-01 |
| <i>CA421238</i>        | 1,02  | 7,80E-01 | 9,12E-01 |
| <i>ENST00000368778</i> | 1,02  | 7,80E-01 | 9,12E-01 |
| <i>THC2241640</i>      | 1,01  | 7,80E-01 | 9,12E-01 |
| <i>ABCC1</i>           | -1,01 | 7,80E-01 | 9,12E-01 |
| <i>A_24_P212611</i>    | -1,01 | 7,80E-01 | 9,12E-01 |
| <i>JARID1A</i>         | -1,01 | 7,80E-01 | 9,12E-01 |
| <i>REEP4</i>           | -1,03 | 7,80E-01 | 9,12E-01 |

|                        |       |          |          |
|------------------------|-------|----------|----------|
| <i>LOC123688</i>       | -1,01 | 7,80E-01 | 9,12E-01 |
| <i>MDAC1</i>           | 1,01  | 7,80E-01 | 9,12E-01 |
| <i>FABP7</i>           | 1,01  | 7,80E-01 | 9,12E-01 |
| <i>ENST00000335571</i> | 1,01  | 7,80E-01 | 9,12E-01 |
| <i>NAG</i>             | -1,01 | 7,80E-01 | 9,12E-01 |
| <i>CD68</i>            | -1,03 | 7,81E-01 | 9,12E-01 |
| <i>PRCP</i>            | -1,02 | 7,81E-01 | 9,12E-01 |
| <i>ENST00000321795</i> | -1,02 | 7,81E-01 | 9,12E-01 |
| <i>BC030099</i>        | -1,01 | 7,81E-01 | 9,12E-01 |
| <i>OR13C4</i>          | -1,01 | 7,81E-01 | 9,12E-01 |
| <i>A_24_P761727</i>    | 1,01  | 7,81E-01 | 9,12E-01 |
| <i>A_32_P8857</i>      | 1,01  | 7,81E-01 | 9,12E-01 |
| <i>BF149382</i>        | 1,01  | 7,81E-01 | 9,12E-01 |
| <i>NES</i>             | -1,03 | 7,81E-01 | 9,12E-01 |
| <i>ZNF208</i>          | -1,02 | 7,81E-01 | 9,12E-01 |
| <i>AK090761</i>        | -1,01 | 7,81E-01 | 9,12E-01 |
| <i>THC2272609</i>      | -1,01 | 7,81E-01 | 9,12E-01 |
| <i>BE719776</i>        | 1,01  | 7,81E-01 | 9,12E-01 |
| <i>DDX18</i>           | 1,01  | 7,81E-01 | 9,12E-01 |
| <i>BX104057</i>        | 1,01  | 7,81E-01 | 9,12E-01 |
| <i>PTEN</i>            | 1,02  | 7,81E-01 | 9,12E-01 |
| <i>HBA2</i>            | 1,06  | 7,81E-01 | 9,12E-01 |
| <i>C17orf78</i>        | -1,01 | 7,81E-01 | 9,12E-01 |
| <i>PLOD1</i>           | 1,02  | 7,81E-01 | 9,12E-01 |
| <i>SPRYD5</i>          | -1,02 | 7,81E-01 | 9,13E-01 |
| <i>BX397553</i>        | -1,01 | 7,81E-01 | 9,13E-01 |
| <i>DCP_22_4</i>        | 1,14  | 7,81E-01 | 9,13E-01 |
| <i>ENST00000316575</i> | 1,02  | 7,81E-01 | 9,13E-01 |
| <i>FAM90A1</i>         | -1,01 | 7,81E-01 | 9,13E-01 |
| <i>SLC7A9</i>          | 1,01  | 7,81E-01 | 9,13E-01 |
| <i>AA989132</i>        | 1,02  | 7,81E-01 | 9,13E-01 |
| <i>A_24_P928250</i>    | -1,01 | 7,82E-01 | 9,13E-01 |
| <i>DEPDC6</i>          | -1,03 | 7,82E-01 | 9,13E-01 |
| <i>CHRNA3</i>          | -1,04 | 7,82E-01 | 9,13E-01 |
| <i>A_24_P315774</i>    | -1,02 | 7,82E-01 | 9,13E-01 |
| <i>THC2340678</i>      | 1,01  | 7,82E-01 | 9,13E-01 |
| <i>HMGN3</i>           | -1,01 | 7,82E-01 | 9,13E-01 |
| <i>A_24_P938553</i>    | 1,01  | 7,82E-01 | 9,13E-01 |
| <i>THC2290704</i>      | -1,01 | 7,82E-01 | 9,13E-01 |
| <i>DKFZp761E198</i>    | 1,01  | 7,82E-01 | 9,13E-01 |
| <i>LOC162632</i>       | -1,03 | 7,82E-01 | 9,13E-01 |
| <i>AI971459</i>        | 1,01  | 7,82E-01 | 9,13E-01 |
| <i>HSPA5</i>           | 1,01  | 7,82E-01 | 9,13E-01 |
| <i>A_24_P315769</i>    | -1,02 | 7,82E-01 | 9,13E-01 |

|                     |       |          |          |
|---------------------|-------|----------|----------|
| <i>PNPLA5</i>       | 1,01  | 7,82E-01 | 9,13E-01 |
| <i>BQ318668</i>     | 1,01  | 7,82E-01 | 9,13E-01 |
| <i>A_24_P272515</i> | -1,06 | 7,82E-01 | 9,13E-01 |
| <i>THC2457016</i>   | -1,02 | 7,82E-01 | 9,13E-01 |
| <i>FLJ39609</i>     | -1,01 | 7,82E-01 | 9,13E-01 |
| <i>KCNK16</i>       | -1,01 | 7,82E-01 | 9,13E-01 |
| <i>FAM120A</i>      | 1,01  | 7,83E-01 | 9,13E-01 |
| <i>COQ9</i>         | 1,01  | 7,82E-01 | 9,13E-01 |
| <i>THC2321251</i>   | 1,01  | 7,83E-01 | 9,13E-01 |
| <i>THC2285198</i>   | -1,10 | 7,83E-01 | 9,13E-01 |
| <i>ARHGAP12</i>     | -1,02 | 7,83E-01 | 9,13E-01 |
| <i>HSPA1A</i>       | 1,02  | 7,83E-01 | 9,13E-01 |
| <i>THC2314823</i>   | -1,03 | 7,83E-01 | 9,13E-01 |
| <i>AV708150</i>     | -1,02 | 7,83E-01 | 9,13E-01 |
| <i>AK097497</i>     | 1,01  | 7,83E-01 | 9,13E-01 |
| <i>X12544</i>       | -1,04 | 7,83E-01 | 9,14E-01 |
| <i>THC2434569</i>   | 1,01  | 7,83E-01 | 9,14E-01 |
| <i>CDC34</i>        | 1,01  | 7,83E-01 | 9,14E-01 |
| <i>AANAT</i>        | 1,01  | 7,83E-01 | 9,14E-01 |
| <i>BTG3</i>         | 1,02  | 7,83E-01 | 9,14E-01 |
| <i>OXA1L</i>        | -1,01 | 7,83E-01 | 9,14E-01 |
| <i>KIAA0492</i>     | -1,01 | 7,84E-01 | 9,14E-01 |
| <i>NCR2</i>         | -1,01 | 7,84E-01 | 9,14E-01 |
| <i>SRPK1</i>        | -1,01 | 7,84E-01 | 9,14E-01 |
| <i>RNF185</i>       | -1,01 | 7,84E-01 | 9,14E-01 |
| <i>THC2405854</i>   | -1,01 | 7,84E-01 | 9,14E-01 |
| <i>BF570356</i>     | -1,01 | 7,84E-01 | 9,14E-01 |
| <i>THC2378712</i>   | 1,01  | 7,84E-01 | 9,14E-01 |
| <i>A_24_P400970</i> | 1,01  | 7,84E-01 | 9,14E-01 |
| <i>FAT2</i>         | 1,01  | 7,84E-01 | 9,14E-01 |
| <i>RRM2B</i>        | 1,01  | 7,83E-01 | 9,14E-01 |
| <i>FRAS1</i>        | 1,03  | 7,84E-01 | 9,14E-01 |
| <i>BX405503</i>     | 1,01  | 7,84E-01 | 9,14E-01 |
| <i>AK124097</i>     | -1,07 | 7,84E-01 | 9,14E-01 |
| <i>BC080589</i>     | 1,01  | 7,84E-01 | 9,14E-01 |
| <i>A_24_P832737</i> | 1,03  | 7,84E-01 | 9,14E-01 |
| <i>LOC644489</i>    | 1,01  | 7,84E-01 | 9,14E-01 |
| <i>LOC400756</i>    | -1,01 | 7,84E-01 | 9,14E-01 |
| <i>C22orf30</i>     | -1,01 | 7,84E-01 | 9,14E-01 |
| <i>GSTCD</i>        | -1,01 | 7,84E-01 | 9,14E-01 |
| <i>A_24_P843921</i> | -1,02 | 7,84E-01 | 9,14E-01 |
| <i>SF3A2</i>        | 1,02  | 7,84E-01 | 9,14E-01 |
| <i>GLP1R</i>        | -1,01 | 7,84E-01 | 9,14E-01 |
| <i>A_24_P392312</i> | -1,01 | 7,84E-01 | 9,14E-01 |

|                 |       |          |          |
|-----------------|-------|----------|----------|
| LOR             | 1,04  | 7,84E-01 | 9,14E-01 |
| SLC29A1         | -1,01 | 7,85E-01 | 9,14E-01 |
| CKMT2           | -1,02 | 7,85E-01 | 9,14E-01 |
| SCT             | 1,01  | 7,85E-01 | 9,14E-01 |
| TPM1            | -1,05 | 7,85E-01 | 9,14E-01 |
| AK056827        | 1,01  | 7,85E-01 | 9,14E-01 |
| A_24_P766205    | -1,01 | 7,85E-01 | 9,14E-01 |
| HTR6            | -1,01 | 7,85E-01 | 9,14E-01 |
| BQ010172        | -1,03 | 7,85E-01 | 9,14E-01 |
| KIAA0565        | -1,03 | 7,85E-01 | 9,14E-01 |
| ENST00000344035 | -1,01 | 7,85E-01 | 9,14E-01 |
| GNAI3           | -1,01 | 7,85E-01 | 9,14E-01 |
| THC2266291      | -1,01 | 7,85E-01 | 9,14E-01 |
| CD1B            | -1,01 | 7,85E-01 | 9,14E-01 |
| MIA2            | 1,01  | 7,85E-01 | 9,14E-01 |
| C9orf116        | 1,01  | 7,85E-01 | 9,14E-01 |
| MGC34774        | 1,01  | 7,85E-01 | 9,14E-01 |
| C9orf41         | 1,01  | 7,85E-01 | 9,14E-01 |
| A_24_P67638     | 1,01  | 7,85E-01 | 9,14E-01 |
| AK098638        | 1,01  | 7,85E-01 | 9,14E-01 |
| BU187991        | 1,01  | 7,85E-01 | 9,14E-01 |
| C1orf180        | 1,02  | 7,85E-01 | 9,14E-01 |
| SPTLC2L         | 1,03  | 7,85E-01 | 9,14E-01 |
| P2RY14          | 1,04  | 7,85E-01 | 9,14E-01 |
| A_24_P916299    | 1,01  | 7,86E-01 | 9,15E-01 |
| LOC550643       | 1,01  | 7,85E-01 | 9,15E-01 |
| THC2339079      | 1,01  | 7,86E-01 | 9,15E-01 |
| PIM2            | 1,02  | 7,86E-01 | 9,15E-01 |
| A_24_P50381     | 1,03  | 7,86E-01 | 9,15E-01 |
| THC2340379      | -1,01 | 7,86E-01 | 9,15E-01 |
| AL355687        | 1,01  | 7,86E-01 | 9,15E-01 |
| ARL3            | 1,01  | 7,86E-01 | 9,15E-01 |
| BQ674642        | 1,01  | 7,86E-01 | 9,15E-01 |
| AF086032        | 1,02  | 7,86E-01 | 9,15E-01 |
| ITGA6           | -1,02 | 7,86E-01 | 9,15E-01 |
| STEAP2          | -1,03 | 7,86E-01 | 9,15E-01 |
| AY135834        | -1,01 | 7,86E-01 | 9,15E-01 |
| AW269819        | -1,01 | 7,86E-01 | 9,15E-01 |
| PRODH2          | 1,01  | 7,86E-01 | 9,15E-01 |
| ZP3             | 1,03  | 7,86E-01 | 9,15E-01 |
| ENST00000215202 | -1,01 | 7,86E-01 | 9,15E-01 |
| RBM35B          | -1,03 | 7,86E-01 | 9,15E-01 |
| GIPC1           | -1,01 | 7,86E-01 | 9,15E-01 |
| POLR3G          | 1,01  | 7,86E-01 | 9,15E-01 |



|                        |       |          |          |
|------------------------|-------|----------|----------|
| <i>KRT34</i>           | -1,09 | 7,87E-01 | 9,15E-01 |
| <i>PDK1</i>            | -1,01 | 7,86E-01 | 9,15E-01 |
| <i>SEC63D1</i>         | -1,01 | 7,86E-01 | 9,15E-01 |
| <i>THC2420922</i>      | -1,01 | 7,87E-01 | 9,15E-01 |
| <i>KIAA1411</i>        | -1,01 | 7,87E-01 | 9,15E-01 |
| <i>CRYGB</i>           | -1,01 | 7,87E-01 | 9,15E-01 |
| <i>ATOH7</i>           | -1,01 | 7,86E-01 | 9,15E-01 |
| <i>PPP2R1A</i>         | 1,01  | 7,87E-01 | 9,15E-01 |
| <i>CIZ1</i>            | 1,01  | 7,86E-01 | 9,15E-01 |
| <i>AF222023</i>        | 1,01  | 7,87E-01 | 9,15E-01 |
| <i>CXorf41</i>         | 1,01  | 7,87E-01 | 9,15E-01 |
| <i>A_24_P109703</i>    | 1,02  | 7,87E-01 | 9,15E-01 |
| <i>KIAA1377</i>        | -1,03 | 7,87E-01 | 9,15E-01 |
| <i>PHLDB1</i>          | -1,01 | 7,87E-01 | 9,15E-01 |
| <i>EVC2</i>            | -1,01 | 7,87E-01 | 9,15E-01 |
| <i>THC2314403</i>      | -1,01 | 7,87E-01 | 9,15E-01 |
| <i>LRIG3</i>           | -1,01 | 7,87E-01 | 9,15E-01 |
| <i>ENST00000287144</i> | -1,01 | 7,87E-01 | 9,15E-01 |
| <i>FBXL18</i>          | -1,01 | 7,87E-01 | 9,15E-01 |
| <i>A_24_P937281</i>    | 1,01  | 7,87E-01 | 9,15E-01 |
| <i>BE167316</i>        | 1,01  | 7,87E-01 | 9,15E-01 |
| <i>THC2341985</i>      | 1,01  | 7,87E-01 | 9,15E-01 |
| <i>A_24_P458252</i>    | 1,01  | 7,87E-01 | 9,15E-01 |
| <i>LOC541471</i>       | 1,02  | 7,87E-01 | 9,15E-01 |
| <i>THC2378893</i>      | 1,02  | 7,87E-01 | 9,15E-01 |
| <i>SYT17</i>           | 1,03  | 7,87E-01 | 9,15E-01 |
| <i>KCNA1</i>           | 1,03  | 7,87E-01 | 9,15E-01 |
| <i>SERPINA6</i>        | 1,06  | 7,87E-01 | 9,15E-01 |
| <i>LOC642775</i>       | -1,02 | 7,87E-01 | 9,15E-01 |
| <i>AK129547</i>        | -1,01 | 7,87E-01 | 9,15E-01 |
| <i>RANBP2</i>          | 1,01  | 7,87E-01 | 9,15E-01 |
| <i>AIFL</i>            | 1,01  | 7,87E-01 | 9,15E-01 |
| <i>PNLIPRP2</i>        | 1,02  | 7,87E-01 | 9,15E-01 |
| <i>DDIT4</i>           | 1,03  | 7,87E-01 | 9,15E-01 |
| <i>BX113298</i>        | 1,02  | 7,87E-01 | 9,15E-01 |
| <i>A_32_P167761</i>    | 1,01  | 7,88E-01 | 9,15E-01 |
| <i>PHF1</i>            | 1,02  | 7,88E-01 | 9,15E-01 |
| <i>BQ045216</i>        | 1,03  | 7,88E-01 | 9,15E-01 |
| <i>CYP2C9</i>          | -1,02 | 7,88E-01 | 9,15E-01 |
| <i>THC2290729</i>      | -1,01 | 7,88E-01 | 9,15E-01 |
| <i>NAGK</i>            | 1,01  | 7,88E-01 | 9,15E-01 |
| <i>BG209258</i>        | -1,01 | 7,88E-01 | 9,15E-01 |
| <i>BC015588</i>        | 1,01  | 7,88E-01 | 9,15E-01 |
| <i>BI058698</i>        | 1,02  | 7,88E-01 | 9,15E-01 |

|                        |       |          |          |
|------------------------|-------|----------|----------|
| <i>FCER1A</i>          | -1,03 | 7,88E-01 | 9,15E-01 |
| <i>PTPRC</i>           | -1,02 | 7,88E-01 | 9,15E-01 |
| <i>ENST00000355646</i> | -1,01 | 7,88E-01 | 9,15E-01 |
| <i>NAT5</i>            | 1,01  | 7,88E-01 | 9,15E-01 |
| <i>X63966</i>          | 1,01  | 7,88E-01 | 9,15E-01 |
| <i>AU157551</i>        | 1,01  | 7,88E-01 | 9,15E-01 |
| <i>C18orf16</i>        | 1,01  | 7,88E-01 | 9,15E-01 |
| <i>DHX32</i>           | -1,01 | 7,88E-01 | 9,15E-01 |
| <i>MGC26694</i>        | 1,01  | 7,88E-01 | 9,15E-01 |
| <i>A_24_P638453</i>    | 1,01  | 7,88E-01 | 9,15E-01 |
| <i>SAMSN1</i>          | -1,02 | 7,89E-01 | 9,16E-01 |
| <i>SEMA4G</i>          | -1,01 | 7,89E-01 | 9,16E-01 |
| <i>THC2378145</i>      | -1,01 | 7,89E-01 | 9,16E-01 |
| <i>DR033550</i>        | 1,01  | 7,89E-01 | 9,16E-01 |
| <i>OR10H4</i>          | 1,01  | 7,89E-01 | 9,16E-01 |
| <i>BE670437</i>        | 1,01  | 7,89E-01 | 9,16E-01 |
| <i>NME2P1</i>          | 1,01  | 7,89E-01 | 9,16E-01 |
| <i>A_24_P110541</i>    | 1,02  | 7,89E-01 | 9,16E-01 |
| <i>RAMP2</i>           | 1,02  | 7,89E-01 | 9,16E-01 |
| <i>RBM22</i>           | 1,01  | 7,89E-01 | 9,16E-01 |
| <i>UBE2T</i>           | -1,04 | 7,89E-01 | 9,16E-01 |
| <i>LSM10</i>           | 1,01  | 7,89E-01 | 9,16E-01 |
| <i>AK022024</i>        | 1,01  | 7,89E-01 | 9,16E-01 |
| <i>C6orf125</i>        | -1,02 | 7,89E-01 | 9,16E-01 |
| <i>BC045677</i>        | -1,02 | 7,89E-01 | 9,16E-01 |
| <i>VPS54</i>           | -1,01 | 7,89E-01 | 9,16E-01 |
| <i>NOX1</i>            | -1,01 | 7,89E-01 | 9,16E-01 |
| <i>FLJ31713</i>        | 1,01  | 7,89E-01 | 9,16E-01 |
| <i>FAM54A</i>          | 1,01  | 7,89E-01 | 9,16E-01 |
| <i>INSRR</i>           | 1,01  | 7,89E-01 | 9,16E-01 |
| <i>VPS53</i>           | -1,01 | 7,89E-01 | 9,16E-01 |
| <i>CR1L</i>            | -1,01 | 7,90E-01 | 9,16E-01 |
| <i>DKFZP434B061</i>    | 1,02  | 7,90E-01 | 9,16E-01 |
| <i>THC2267053</i>      | 1,01  | 7,90E-01 | 9,16E-01 |
| <i>ENST00000377711</i> | -1,01 | 7,90E-01 | 9,16E-01 |
| <i>CENPK</i>           | -1,01 | 7,90E-01 | 9,16E-01 |
| <i>STCH</i>            | 1,01  | 7,90E-01 | 9,16E-01 |
| <i>FCHSD2</i>          | 1,01  | 7,90E-01 | 9,16E-01 |
| <i>C1orf198</i>        | 1,02  | 7,90E-01 | 9,16E-01 |
| <i>NDUFB11</i>         | -1,01 | 7,90E-01 | 9,16E-01 |
| <i>SUPT4H1</i>         | -1,01 | 7,90E-01 | 9,16E-01 |
| <i>THC2440280</i>      | 1,01  | 7,90E-01 | 9,16E-01 |
| <i>TFG</i>             | 1,01  | 7,90E-01 | 9,16E-01 |
| <i>ENST00000323198</i> | 1,01  | 7,90E-01 | 9,16E-01 |

|                        |       |          |          |
|------------------------|-------|----------|----------|
| <i>AK001176</i>        | -1,01 | 7,90E-01 | 9,16E-01 |
| <i>HOXB8</i>           | -1,08 | 7,90E-01 | 9,16E-01 |
| <i>ZC3H8</i>           | 1,01  | 7,90E-01 | 9,16E-01 |
| <i>BAI1</i>            | 1,01  | 7,90E-01 | 9,16E-01 |
| <i>C21orf122</i>       | -1,02 | 7,90E-01 | 9,16E-01 |
| <i>PLCD1</i>           | -1,01 | 7,90E-01 | 9,16E-01 |
| <i>SMG5</i>            | -1,02 | 7,91E-01 | 9,16E-01 |
| <i>AK025344</i>        | -1,01 | 7,91E-01 | 9,16E-01 |
| <i>FANK1</i>           | -1,01 | 7,91E-01 | 9,16E-01 |
| <i>A_24_P290109</i>    | -1,01 | 7,91E-01 | 9,16E-01 |
| <i>ENST00000359119</i> | -1,01 | 7,91E-01 | 9,16E-01 |
| <i>KLHL1</i>           | -1,01 | 7,91E-01 | 9,16E-01 |
| <i>A_24_P829882</i>    | -1,01 | 7,91E-01 | 9,16E-01 |
| <i>ENST00000258772</i> | -1,01 | 7,91E-01 | 9,16E-01 |
| <i>NRBP1</i>           | -1,01 | 7,91E-01 | 9,16E-01 |
| <i>ORMDL3</i>          | 1,01  | 7,91E-01 | 9,16E-01 |
| <i>RAB39</i>           | 1,01  | 7,91E-01 | 9,16E-01 |
| <i>BF002532</i>        | 1,01  | 7,91E-01 | 9,16E-01 |
| <i>A_32_P120014</i>    | 1,01  | 7,91E-01 | 9,16E-01 |
| <i>LOC645919</i>       | 1,01  | 7,91E-01 | 9,16E-01 |
| <i>C14orf44</i>        | 1,01  | 7,91E-01 | 9,16E-01 |
| <i>TAGLN3</i>          | 1,01  | 7,91E-01 | 9,16E-01 |
| <i>HYAL1</i>           | 1,02  | 7,91E-01 | 9,16E-01 |
| <i>LOC144305</i>       | 1,02  | 7,91E-01 | 9,16E-01 |
| <i>ADAMTS5</i>         | 1,02  | 7,91E-01 | 9,16E-01 |
| <i>A_24_P647682</i>    | 1,02  | 7,91E-01 | 9,16E-01 |
| <i>ZNF289</i>          | 1,01  | 7,91E-01 | 9,17E-01 |
| <i>ENST00000258817</i> | -1,01 | 7,91E-01 | 9,17E-01 |
| <i>ACP5</i>            | -1,04 | 7,91E-01 | 9,17E-01 |
| <i>TMTC4</i>           | -1,01 | 7,91E-01 | 9,17E-01 |
| <i>ENST00000317648</i> | 1,01  | 7,91E-01 | 9,17E-01 |
| <i>GPR20</i>           | 1,03  | 7,91E-01 | 9,17E-01 |
| <i>X78261</i>          | -1,01 | 7,91E-01 | 9,17E-01 |
| <i>BC047380</i>        | -1,02 | 7,92E-01 | 9,17E-01 |
| <i>SLC39A10</i>        | -1,01 | 7,92E-01 | 9,17E-01 |
| <i>BCCIP</i>           | -1,01 | 7,92E-01 | 9,17E-01 |
| <i>FUT9</i>            | 1,01  | 7,92E-01 | 9,17E-01 |
| <i>PURA</i>            | 1,01  | 7,92E-01 | 9,17E-01 |
| <i>ENST00000262811</i> | 1,01  | 7,92E-01 | 9,17E-01 |
| <i>SMCP</i>            | 1,01  | 7,92E-01 | 9,17E-01 |
| <i>E1A_r60_a22</i>     | 1,13  | 7,92E-01 | 9,17E-01 |
| <i>GAGE7</i>           | -1,01 | 7,92E-01 | 9,17E-01 |
| <i>A_24_P884690</i>    | -1,01 | 7,92E-01 | 9,17E-01 |
| <i>BC047952</i>        | -1,04 | 7,92E-01 | 9,17E-01 |

|                        |       |          |          |
|------------------------|-------|----------|----------|
| <i>NECAP1</i>          | -1,01 | 7,92E-01 | 9,17E-01 |
| <i>ENST00000310390</i> | 1,01  | 7,92E-01 | 9,17E-01 |
| <i>CD243286</i>        | 1,01  | 7,92E-01 | 9,17E-01 |
| <i>ZBTB12</i>          | -1,01 | 7,92E-01 | 9,17E-01 |
| <i>A_24_P307384</i>    | 1,03  | 7,92E-01 | 9,17E-01 |
| <i>A_24_P384411</i>    | -1,03 | 7,92E-01 | 9,17E-01 |
| <i>C19orf15</i>        | -1,01 | 7,92E-01 | 9,17E-01 |
| <i>KIAA0329</i>        | -1,01 | 7,93E-01 | 9,17E-01 |
| <i>CR590163</i>        | -1,01 | 7,93E-01 | 9,17E-01 |
| <i>H28997</i>          | -1,01 | 7,93E-01 | 9,17E-01 |
| <i>AK074578</i>        | 1,01  | 7,93E-01 | 9,17E-01 |
| <i>THC2386572</i>      | 1,01  | 7,93E-01 | 9,17E-01 |
| <i>AA594975</i>        | 1,02  | 7,93E-01 | 9,17E-01 |
| <i>DCP_22_0</i>        | 1,13  | 7,93E-01 | 9,17E-01 |
| <i>DCP_22_6</i>        | 1,14  | 7,93E-01 | 9,17E-01 |
| <i>A_24_P783810</i>    | 1,02  | 7,93E-01 | 9,17E-01 |
| <i>C17orf38</i>        | -1,01 | 7,93E-01 | 9,17E-01 |
| <i>AL133118</i>        | 1,02  | 7,93E-01 | 9,17E-01 |
| <i>ACY3</i>            | -1,01 | 7,93E-01 | 9,17E-01 |
| <i>DCP_22_2</i>        | 1,13  | 7,93E-01 | 9,17E-01 |
| <i>A_24_P50707</i>     | -1,03 | 7,93E-01 | 9,17E-01 |
| <i>RWDD2</i>           | -1,01 | 7,93E-01 | 9,17E-01 |
| <i>AW068592</i>        | -1,01 | 7,93E-01 | 9,17E-01 |
| <i>C10orf79</i>        | -1,01 | 7,93E-01 | 9,17E-01 |
| <i>KEAP1</i>           | 1,01  | 7,93E-01 | 9,17E-01 |
| <i>TMED10P</i>         | 1,02  | 7,93E-01 | 9,17E-01 |
| <i>X87893</i>          | -1,01 | 7,93E-01 | 9,17E-01 |
| <i>THC2378069</i>      | -1,01 | 7,93E-01 | 9,17E-01 |
| <i>KCNMA1</i>          | -1,06 | 7,93E-01 | 9,17E-01 |
| <i>LLGL2</i>           | -1,01 | 7,93E-01 | 9,17E-01 |
| <i>A_32_P25380</i>     | -1,01 | 7,93E-01 | 9,17E-01 |
| <i>PRMT8</i>           | 1,01  | 7,93E-01 | 9,17E-01 |
| <i>GPR31</i>           | 1,01  | 7,93E-01 | 9,17E-01 |
| <i>SPTAN1</i>          | 1,01  | 7,93E-01 | 9,17E-01 |
| <i>C9orf95</i>         | -1,02 | 7,93E-01 | 9,17E-01 |
| <i>PHF5A</i>           | -1,01 | 7,93E-01 | 9,17E-01 |
| <i>A_32_P102247</i>    | 1,01  | 7,93E-01 | 9,17E-01 |
| <i>BI916497</i>        | 1,02  | 7,94E-01 | 9,17E-01 |
| <i>HEPH</i>            | -1,01 | 7,94E-01 | 9,17E-01 |
| <i>TM4SF18</i>         | 1,02  | 7,94E-01 | 9,17E-01 |
| <i>OR7A10</i>          | -1,01 | 7,94E-01 | 9,17E-01 |
| <i>BQ345506</i>        | 1,01  | 7,94E-01 | 9,17E-01 |
| <i>FLJ34651</i>        | 1,01  | 7,94E-01 | 9,17E-01 |
| <i>P4HB</i>            | -1,02 | 7,94E-01 | 9,18E-01 |

|                        |       |          |          |
|------------------------|-------|----------|----------|
| <i>AL050204</i>        | -1,02 | 7,94E-01 | 9,18E-01 |
| <i>C16orf14</i>        | -1,01 | 7,94E-01 | 9,18E-01 |
| <i>ENST00000370237</i> | -1,01 | 7,94E-01 | 9,18E-01 |
| <i>ALDH3B2</i>         | -1,02 | 7,94E-01 | 9,18E-01 |
| <i>OR5H1</i>           | -1,01 | 7,94E-01 | 9,18E-01 |
| <i>FLJ37478</i>        | -1,03 | 7,94E-01 | 9,18E-01 |
| <i>IXL</i>             | 1,01  | 7,94E-01 | 9,18E-01 |
| <i>A_24_P290068</i>    | 1,02  | 7,94E-01 | 9,18E-01 |
| <i>ARMCX3</i>          | 1,01  | 7,94E-01 | 9,18E-01 |
| <i>CR597270</i>        | -1,01 | 7,94E-01 | 9,18E-01 |
| <i>WDR52</i>           | -1,02 | 7,95E-01 | 9,18E-01 |
| <i>FUCA2</i>           | -1,02 | 7,95E-01 | 9,18E-01 |
| <i>GPR1</i>            | -1,01 | 7,95E-01 | 9,18E-01 |
| <i>ZNF695</i>          | -1,01 | 7,95E-01 | 9,18E-01 |
| <i>BI828274</i>        | -1,01 | 7,95E-01 | 9,18E-01 |
| <i>HSSUCCDH</i>        | -1,01 | 7,95E-01 | 9,18E-01 |
| <i>OR2F1</i>           | 1,01  | 7,95E-01 | 9,18E-01 |
| <i>C8orf47</i>         | 1,01  | 7,95E-01 | 9,18E-01 |
| <i>AW275876</i>        | 1,01  | 7,95E-01 | 9,18E-01 |
| <i>A_24_P75840</i>     | 1,01  | 7,95E-01 | 9,18E-01 |
| <i>ABHD8</i>           | 1,02  | 7,95E-01 | 9,18E-01 |
| <i>NOX3</i>            | 1,01  | 7,95E-01 | 9,18E-01 |
| <i>BQ320385</i>        | -1,01 | 7,95E-01 | 9,18E-01 |
| <i>RAB26</i>           | -1,01 | 7,95E-01 | 9,18E-01 |
| <i>TOMM40L</i>         | 1,01  | 7,95E-01 | 9,18E-01 |
| <i>CCDC36</i>          | 1,01  | 7,95E-01 | 9,18E-01 |
| <i>NMU</i>             | -1,07 | 7,95E-01 | 9,18E-01 |
| <i>A_32_P178724</i>    | -1,02 | 7,95E-01 | 9,18E-01 |
| <i>TMEM142C</i>        | -1,01 | 7,95E-01 | 9,18E-01 |
| <i>BQ184185</i>        | -1,01 | 7,95E-01 | 9,18E-01 |
| <i>MST1R</i>           | -1,01 | 7,95E-01 | 9,18E-01 |
| <i>TM4SF5</i>          | -1,01 | 7,95E-01 | 9,18E-01 |
| <i>LOC401845</i>       | -1,01 | 7,95E-01 | 9,18E-01 |
| <i>AK123584</i>        | -1,01 | 7,95E-01 | 9,18E-01 |
| <i>EIF3S4</i>          | 1,01  | 7,95E-01 | 9,18E-01 |
| <i>THC2282384</i>      | -1,01 | 7,96E-01 | 9,18E-01 |
| <i>THC2284306</i>      | -1,01 | 7,96E-01 | 9,18E-01 |
| <i>HSPA12A</i>         | -1,02 | 7,96E-01 | 9,18E-01 |
| <i>HCRTR2</i>          | 1,01  | 7,96E-01 | 9,18E-01 |
| <i>THC2442647</i>      | -1,01 | 7,96E-01 | 9,18E-01 |
| <i>SI</i>              | 1,01  | 7,96E-01 | 9,18E-01 |
| <i>FAIM</i>            | 1,01  | 7,96E-01 | 9,19E-01 |
| <i>SPATA18</i>         | 1,01  | 7,96E-01 | 9,19E-01 |
| <i>A_23_P134405</i>    | 1,01  | 7,96E-01 | 9,19E-01 |

|                        |       |          |          |
|------------------------|-------|----------|----------|
| <i>BC043411</i>        | -1,02 | 7,96E-01 | 9,19E-01 |
| <i>A_24_P920376</i>    | 1,01  | 7,96E-01 | 9,19E-01 |
| <i>BF965065</i>        | -1,01 | 7,96E-01 | 9,19E-01 |
| <i>THC2439278</i>      | -1,01 | 7,96E-01 | 9,19E-01 |
| <i>ENST00000334574</i> | -1,01 | 7,96E-01 | 9,19E-01 |
| <i>MOG</i>             | 1,01  | 7,96E-01 | 9,19E-01 |
| <i>ENST00000216214</i> | -1,01 | 7,96E-01 | 9,19E-01 |
| <i>USP26</i>           | -1,01 | 7,96E-01 | 9,19E-01 |
| <i>P2RX5</i>           | -1,01 | 7,97E-01 | 9,19E-01 |
| <i>HSF5</i>            | 1,01  | 7,97E-01 | 9,19E-01 |
| <i>ENST00000367146</i> | 1,01  | 7,97E-01 | 9,19E-01 |
| <i>ASNS</i>            | 1,01  | 7,97E-01 | 9,19E-01 |
| <i>N24703</i>          | 1,01  | 7,97E-01 | 9,19E-01 |
| <i>HSF4</i>            | 1,01  | 7,97E-01 | 9,19E-01 |
| <i>A_24_P15502</i>     | 1,01  | 7,97E-01 | 9,19E-01 |
| <i>ENST00000324982</i> | 1,02  | 7,97E-01 | 9,19E-01 |
| <i>GMPR2</i>           | -1,01 | 7,97E-01 | 9,19E-01 |
| <i>ZNFN1A2</i>         | -1,01 | 7,97E-01 | 9,19E-01 |
| <i>AL137709</i>        | -1,01 | 7,97E-01 | 9,19E-01 |
| <i>MADCAM1</i>         | 1,01  | 7,97E-01 | 9,19E-01 |
| <i>FLJ32951</i>        | 1,01  | 7,97E-01 | 9,19E-01 |
| <i>SLC16A1</i>         | -1,11 | 7,97E-01 | 9,19E-01 |
| <i>C6orf48</i>         | -1,01 | 7,97E-01 | 9,19E-01 |
| <i>TTY1</i>            | -1,01 | 7,97E-01 | 9,19E-01 |
| <i>C17orf75</i>        | -1,01 | 7,97E-01 | 9,19E-01 |
| <i>PXDNL</i>           | -1,01 | 7,97E-01 | 9,19E-01 |
| <i>A_23_P132606</i>    | -1,01 | 7,97E-01 | 9,19E-01 |
| <i>CCDC92</i>          | -1,01 | 7,97E-01 | 9,19E-01 |
| <i>BM768581</i>        | 1,01  | 7,97E-01 | 9,19E-01 |
| <i>A_24_P461547</i>    | 1,01  | 7,97E-01 | 9,19E-01 |
| <i>A_24_P84482</i>     | 1,02  | 7,97E-01 | 9,19E-01 |
| <i>DEFB114</i>         | 1,01  | 7,97E-01 | 9,19E-01 |
| <i>LOC645013</i>       | 1,02  | 7,97E-01 | 9,19E-01 |
| <i>SERPINB2</i>        | -1,02 | 7,97E-01 | 9,19E-01 |
| <i>THC2375722</i>      | 1,01  | 7,98E-01 | 9,19E-01 |
| <i>ADRB2</i>           | -1,02 | 7,98E-01 | 9,19E-01 |
| <i>HTR1D</i>           | -1,01 | 7,98E-01 | 9,19E-01 |
| <i>ENST00000356197</i> | -1,01 | 7,98E-01 | 9,19E-01 |
| <i>SETD1A</i>          | 1,01  | 7,98E-01 | 9,19E-01 |
| <i>LHCGR</i>           | 1,01  | 7,98E-01 | 9,19E-01 |
| <i>TECTA</i>           | 1,01  | 7,98E-01 | 9,19E-01 |
| <i>A_32_P9337</i>      | 1,01  | 7,98E-01 | 9,19E-01 |
| <i>TSPAN8</i>          | 1,04  | 7,98E-01 | 9,19E-01 |
| <i>GPR64</i>           | 1,04  | 7,98E-01 | 9,19E-01 |

|                        |       |          |          |
|------------------------|-------|----------|----------|
| <i>LRP11</i>           | -1,01 | 7,98E-01 | 9,19E-01 |
| <i>RASA3</i>           | 1,01  | 7,98E-01 | 9,19E-01 |
| <i>A_32_P114268</i>    | 1,02  | 7,98E-01 | 9,19E-01 |
| <i>CENTD3</i>          | 1,02  | 7,98E-01 | 9,19E-01 |
| <i>TMEM50B</i>         | -1,01 | 7,98E-01 | 9,19E-01 |
| <i>MALAT1</i>          | 1,02  | 7,98E-01 | 9,19E-01 |
| <i>KIAA1984</i>        | 1,01  | 7,98E-01 | 9,20E-01 |
| <i>Z49090</i>          | 1,01  | 7,98E-01 | 9,20E-01 |
| <i>LOC158381</i>       | 1,02  | 7,98E-01 | 9,20E-01 |
| <i>DSP</i>             | 1,05  | 7,99E-01 | 9,20E-01 |
| <i>KRT1</i>            | -1,14 | 7,99E-01 | 9,20E-01 |
| <i>ELMOD2</i>          | 1,01  | 7,99E-01 | 9,20E-01 |
| <i>AF088033</i>        | -1,01 | 7,99E-01 | 9,20E-01 |
| <i>CCDC73</i>          | -1,04 | 7,99E-01 | 9,20E-01 |
| <i>A_24_P383802</i>    | -1,04 | 7,99E-01 | 9,20E-01 |
| <i>G6PD</i>            | -1,01 | 7,99E-01 | 9,20E-01 |
| <i>LOC340069</i>       | -1,01 | 7,99E-01 | 9,20E-01 |
| <i>CB157062</i>        | -1,01 | 7,99E-01 | 9,20E-01 |
| <i>PLEKHH1</i>         | 1,01  | 7,99E-01 | 9,20E-01 |
| <i>A_24_P514814</i>    | 1,01  | 7,99E-01 | 9,20E-01 |
| <i>DNAH14</i>          | -1,01 | 7,99E-01 | 9,20E-01 |
| <i>BX094715</i>        | 1,01  | 7,99E-01 | 9,20E-01 |
| <i>AA627222</i>        | 1,01  | 7,99E-01 | 9,20E-01 |
| <i>BATF</i>            | 1,02  | 7,99E-01 | 9,20E-01 |
| <i>G6PC</i>            | 1,01  | 7,99E-01 | 9,20E-01 |
| <i>THC2423326</i>      | 1,01  | 7,99E-01 | 9,20E-01 |
| <i>CAPSL</i>           | 1,01  | 8,00E-01 | 9,20E-01 |
| <i>REEP6</i>           | 1,02  | 8,00E-01 | 9,20E-01 |
| <i>ENST00000299502</i> | 1,05  | 8,00E-01 | 9,20E-01 |
| <i>DDX43</i>           | -1,04 | 8,00E-01 | 9,20E-01 |
| <i>PBX4</i>            | -1,02 | 8,00E-01 | 9,20E-01 |
| <i>A_24_P358578</i>    | -1,01 | 8,00E-01 | 9,20E-01 |
| <i>RCP9</i>            | -1,01 | 8,00E-01 | 9,20E-01 |
| <i>BM469851</i>        | -1,01 | 8,00E-01 | 9,20E-01 |
| <i>THC2290169</i>      | 1,01  | 8,00E-01 | 9,20E-01 |
| <i>ADRA1A</i>          | 1,01  | 8,00E-01 | 9,20E-01 |
| <i>THC2430605</i>      | 1,01  | 8,00E-01 | 9,20E-01 |
| <i>AOF2</i>            | 1,01  | 8,00E-01 | 9,20E-01 |
| <i>ENST00000255403</i> | 1,01  | 8,00E-01 | 9,20E-01 |
| <i>BCL2L2</i>          | 1,01  | 8,00E-01 | 9,20E-01 |
| <i>ENST00000376347</i> | 1,02  | 8,00E-01 | 9,20E-01 |
| <i>POTE2</i>           | 1,02  | 8,00E-01 | 9,20E-01 |
| <i>MYCBP</i>           | -1,01 | 8,00E-01 | 9,20E-01 |
| <i>A_24_P934268</i>    | 1,01  | 8,00E-01 | 9,20E-01 |

|                        |       |          |          |
|------------------------|-------|----------|----------|
| <i>TMEM143</i>         | 1,01  | 8,00E-01 | 9,20E-01 |
| <i>A_24_P916858</i>    | 1,01  | 8,00E-01 | 9,20E-01 |
| <i>AK091641</i>        | 1,01  | 8,00E-01 | 9,20E-01 |
| <i>THC2292160</i>      | 1,01  | 8,00E-01 | 9,20E-01 |
| <i>AV707592</i>        | 1,01  | 8,00E-01 | 9,20E-01 |
| <i>THC2341518</i>      | 1,01  | 8,00E-01 | 9,20E-01 |
| <i>KISS1</i>           | -1,01 | 8,00E-01 | 9,20E-01 |
| <i>WDR33</i>           | -1,01 | 8,00E-01 | 9,20E-01 |
| <i>C14orf68</i>        | 1,01  | 8,00E-01 | 9,20E-01 |
| <i>LOC646257</i>       | -1,01 | 8,00E-01 | 9,20E-01 |
| <i>FLJ31813</i>        | 1,08  | 8,01E-01 | 9,20E-01 |
| <i>OTOP1</i>           | 1,01  | 8,01E-01 | 9,20E-01 |
| <i>PIP5K2C</i>         | -1,01 | 8,01E-01 | 9,21E-01 |
| <i>AF333077</i>        | -1,01 | 8,01E-01 | 9,21E-01 |
| <i>A_24_P930842</i>    | 1,01  | 8,01E-01 | 9,21E-01 |
| <i>THC2313453</i>      | -1,02 | 8,01E-01 | 9,21E-01 |
| <i>KLHDC7A</i>         | -1,01 | 8,01E-01 | 9,21E-01 |
| <i>MGC40499</i>        | -1,10 | 8,01E-01 | 9,21E-01 |
| <i>ENST00000296873</i> | -1,01 | 8,01E-01 | 9,21E-01 |
| <i>C17orf47</i>        | 1,01  | 8,01E-01 | 9,21E-01 |
| <i>CASR</i>            | 1,01  | 8,01E-01 | 9,21E-01 |
| <i>COPE</i>            | 1,01  | 8,01E-01 | 9,21E-01 |
| <i>AF075097</i>        | 1,02  | 8,01E-01 | 9,21E-01 |
| <i>KCNK15</i>          | -1,01 | 8,01E-01 | 9,21E-01 |
| <i>THC2346713</i>      | -1,02 | 8,02E-01 | 9,21E-01 |
| <i>BC066878</i>        | 1,01  | 8,02E-01 | 9,21E-01 |
| <i>C3orf27</i>         | 1,01  | 8,02E-01 | 9,21E-01 |
| <i>THC2391337</i>      | 1,01  | 8,02E-01 | 9,21E-01 |
| <i>RAB11FIP4</i>       | 1,01  | 8,02E-01 | 9,21E-01 |
| <i>EIF3S3</i>          | -1,01 | 8,02E-01 | 9,21E-01 |
| <i>AI028577</i>        | 1,01  | 8,02E-01 | 9,21E-01 |
| <i>POP5</i>            | -1,01 | 8,02E-01 | 9,21E-01 |
| <i>CHML</i>            | -1,01 | 8,02E-01 | 9,21E-01 |
| <i>NOXA1</i>           | 1,01  | 8,02E-01 | 9,21E-01 |
| <i>NUMA1</i>           | -1,02 | 8,02E-01 | 9,21E-01 |
| <i>GPR109B</i>         | 1,03  | 8,02E-01 | 9,21E-01 |
| <i>E2F2</i>            | 1,02  | 8,02E-01 | 9,21E-01 |
| <i>PPL</i>             | -1,02 | 8,02E-01 | 9,21E-01 |
| <i>A_32_P99825</i>     | -1,02 | 8,02E-01 | 9,21E-01 |
| <i>CLN5</i>            | -1,01 | 8,02E-01 | 9,21E-01 |
| <i>DKFZp434G179</i>    | -1,01 | 8,02E-01 | 9,21E-01 |
| <i>FLJ20433</i>        | 1,01  | 8,02E-01 | 9,21E-01 |
| <i>THC2438470</i>      | 1,01  | 8,02E-01 | 9,21E-01 |
| <i>KCNC4</i>           | 1,01  | 8,02E-01 | 9,21E-01 |



|                        |       |          |          |
|------------------------|-------|----------|----------|
| <i>NUDT14</i>          | 1,01  | 8,02E-01 | 9,21E-01 |
| <i>ILK</i>             | 1,03  | 8,02E-01 | 9,21E-01 |
| <i>A_24_P790361</i>    | -1,02 | 8,03E-01 | 9,21E-01 |
| <i>BX106262</i>        | -1,01 | 8,03E-01 | 9,21E-01 |
| <i>KIAA1904</i>        | -1,01 | 8,03E-01 | 9,21E-01 |
| <i>BC042553</i>        | -1,01 | 8,03E-01 | 9,21E-01 |
| <i>BE855509</i>        | 1,01  | 8,03E-01 | 9,21E-01 |
| <i>P2RY4</i>           | 1,01  | 8,03E-01 | 9,21E-01 |
| <i>AJ276555</i>        | -1,04 | 8,03E-01 | 9,21E-01 |
| <i>SSBP3</i>           | -1,01 | 8,03E-01 | 9,21E-01 |
| <i>CABLES2</i>         | -1,01 | 8,03E-01 | 9,21E-01 |
| <i>BX095032</i>        | 1,01  | 8,03E-01 | 9,21E-01 |
| <i>ZNF206</i>          | 1,02  | 8,03E-01 | 9,21E-01 |
| <i>THC2445013</i>      | -1,01 | 8,03E-01 | 9,21E-01 |
| <i>HSFY2</i>           | -1,01 | 8,03E-01 | 9,21E-01 |
| <i>OR10R2</i>          | -1,04 | 8,03E-01 | 9,21E-01 |
| <i>SNPH</i>            | -1,02 | 8,03E-01 | 9,21E-01 |
| <i>A_24_P942890</i>    | 1,01  | 8,03E-01 | 9,21E-01 |
| <i>BE968596</i>        | 1,01  | 8,03E-01 | 9,21E-01 |
| <i>ENST00000323501</i> | 1,02  | 8,03E-01 | 9,21E-01 |
| <i>A_24_P929158</i>    | -1,01 | 8,03E-01 | 9,22E-01 |
| <i>A_24_P455100</i>    | 1,01  | 8,03E-01 | 9,22E-01 |
| <i>CABP4</i>           | -1,01 | 8,03E-01 | 9,22E-01 |
| <i>A_24_P127121</i>    | 1,01  | 8,03E-01 | 9,22E-01 |
| <i>YIF1A</i>           | -1,02 | 8,03E-01 | 9,22E-01 |
| <i>PRO1768</i>         | 1,01  | 8,03E-01 | 9,22E-01 |
| <i>A_24_P913078</i>    | 1,01  | 8,04E-01 | 9,22E-01 |
| <i>A_24_P152974</i>    | -1,01 | 8,04E-01 | 9,22E-01 |
| <i>FLJ10232</i>        | -1,01 | 8,04E-01 | 9,22E-01 |
| <i>FIS</i>             | 1,01  | 8,04E-01 | 9,22E-01 |
| <i>BM664910</i>        | 1,01  | 8,04E-01 | 9,22E-01 |
| <i>BDP1</i>            | 1,01  | 8,04E-01 | 9,22E-01 |
| <i>BU953908</i>        | 1,01  | 8,04E-01 | 9,22E-01 |
| <i>A_24_P42140</i>     | 1,01  | 8,04E-01 | 9,22E-01 |
| <i>CLTB</i>            | 1,01  | 8,04E-01 | 9,22E-01 |
| <i>MGC13114</i>        | 1,01  | 8,04E-01 | 9,22E-01 |
| <i>PRRG2</i>           | 1,01  | 8,04E-01 | 9,22E-01 |
| <i>KLK10</i>           | -1,06 | 8,04E-01 | 9,22E-01 |
| <i>A_32_P4349</i>      | -1,02 | 8,04E-01 | 9,22E-01 |
| <i>SETBP1</i>          | -1,01 | 8,04E-01 | 9,22E-01 |
| <i>A_24_P736853</i>    | -1,01 | 8,04E-01 | 9,22E-01 |
| <i>TLR10</i>           | -1,01 | 8,04E-01 | 9,22E-01 |
| <i>MBD5</i>            | -1,01 | 8,04E-01 | 9,22E-01 |
| <i>CRYGC</i>           | -1,01 | 8,04E-01 | 9,22E-01 |

|                        |       |          |          |
|------------------------|-------|----------|----------|
| <i>PDILT</i>           | 1,01  | 8,04E-01 | 9,22E-01 |
| <i>PLEKHG6</i>         | 1,01  | 8,04E-01 | 9,22E-01 |
| <i>AT_ssH_TR_3</i>     | 1,02  | 8,04E-01 | 9,22E-01 |
| <i>A_24_P919114</i>    | 1,01  | 8,04E-01 | 9,22E-01 |
| <i>A_24_P925913</i>    | 1,01  | 8,04E-01 | 9,22E-01 |
| <i>C6orf118</i>        | 1,01  | 8,05E-01 | 9,22E-01 |
| <i>A_24_P367169</i>    | -1,02 | 8,05E-01 | 9,22E-01 |
| <i>IL1F9</i>           | 1,01  | 8,05E-01 | 9,22E-01 |
| <i>JPH3</i>            | -1,01 | 8,05E-01 | 9,22E-01 |
| <i>ENST00000373790</i> | -1,01 | 8,05E-01 | 9,22E-01 |
| <i>OR52B2</i>          | 1,01  | 8,05E-01 | 9,22E-01 |
| <i>DGKH</i>            | 1,03  | 8,05E-01 | 9,22E-01 |
| <i>C2orf24</i>         | -1,01 | 8,05E-01 | 9,22E-01 |
| <i>ENST00000332844</i> | 1,01  | 8,05E-01 | 9,22E-01 |
| <i>EGFL8</i>           | 1,01  | 8,05E-01 | 9,22E-01 |
| <i>MYO5C</i>           | 1,02  | 8,05E-01 | 9,22E-01 |
| <i>CCT6B</i>           | -1,01 | 8,05E-01 | 9,22E-01 |
| <i>CALCOCO1</i>        | 1,02  | 8,05E-01 | 9,22E-01 |
| <i>A_24_P118271</i>    | 1,02  | 8,05E-01 | 9,22E-01 |
| <i>PGDS</i>            | -1,02 | 8,05E-01 | 9,22E-01 |
| <i>DCP_22_7</i>        | 1,12  | 8,05E-01 | 9,22E-01 |
| <i>SUSD4</i>           | -1,02 | 8,05E-01 | 9,23E-01 |
| <i>MGC33407</i>        | 1,01  | 8,05E-01 | 9,23E-01 |
| <i>PDZK1IP1</i>        | -1,05 | 8,06E-01 | 9,23E-01 |
| <i>USP9X</i>           | -1,01 | 8,06E-01 | 9,23E-01 |
| <i>THC2444522</i>      | -1,01 | 8,06E-01 | 9,23E-01 |
| <i>ENST00000235345</i> | -1,01 | 8,06E-01 | 9,23E-01 |
| <i>AW978428</i>        | -1,01 | 8,06E-01 | 9,23E-01 |
| <i>CYP46A1</i>         | -1,01 | 8,06E-01 | 9,23E-01 |
| <i>C2orf33</i>         | -1,01 | 8,06E-01 | 9,23E-01 |
| <i>H16080</i>          | 1,01  | 8,06E-01 | 9,23E-01 |
| <i>SAMD4B</i>          | 1,01  | 8,05E-01 | 9,23E-01 |
| <i>CDH9</i>            | 1,01  | 8,06E-01 | 9,23E-01 |
| <i>BI262095</i>        | 1,01  | 8,06E-01 | 9,23E-01 |
| <i>A_24_P925786</i>    | 1,01  | 8,06E-01 | 9,23E-01 |
| <i>PRKCDBP</i>         | 1,02  | 8,06E-01 | 9,23E-01 |
| <i>CX788817</i>        | 1,02  | 8,05E-01 | 9,23E-01 |
| <i>RPL29P2</i>         | -1,01 | 8,06E-01 | 9,23E-01 |
| <i>BFSP1</i>           | -1,01 | 8,06E-01 | 9,23E-01 |
| <i>TAPBPL</i>          | 1,01  | 8,06E-01 | 9,23E-01 |
| <i>STOML1</i>          | -1,01 | 8,06E-01 | 9,23E-01 |
| <i>AK001132</i>        | -1,01 | 8,06E-01 | 9,23E-01 |
| <i>ENST00000379426</i> | 1,01  | 8,06E-01 | 9,23E-01 |
| <i>ST3GAL2</i>         | -1,01 | 8,06E-01 | 9,23E-01 |

|                        |       |          |          |
|------------------------|-------|----------|----------|
| <i>THC2278838</i>      | -1,01 | 8,06E-01 | 9,23E-01 |
| <i>A_24_P614940</i>    | -1,01 | 8,06E-01 | 9,23E-01 |
| <i>BG197899</i>        | 1,01  | 8,06E-01 | 9,23E-01 |
| <i>RNF24</i>           | 1,01  | 8,07E-01 | 9,23E-01 |
| <i>KLK8</i>            | -1,09 | 8,07E-01 | 9,23E-01 |
| <i>BE932552</i>        | 1,01  | 8,07E-01 | 9,23E-01 |
| <i>ACVR2A</i>          | 1,01  | 8,07E-01 | 9,23E-01 |
| <i>BC030635</i>        | -1,01 | 8,07E-01 | 9,23E-01 |
| <i>LOC644769</i>       | 1,01  | 8,07E-01 | 9,23E-01 |
| <i>THC2376370</i>      | 1,01  | 8,07E-01 | 9,23E-01 |
| <i>C21orf105</i>       | 1,01  | 8,07E-01 | 9,23E-01 |
| <i>HOMER2</i>          | 1,02  | 8,07E-01 | 9,23E-01 |
| <i>XRCC5</i>           | 1,01  | 8,07E-01 | 9,23E-01 |
| <i>BX090709</i>        | 1,01  | 8,07E-01 | 9,23E-01 |
| <i>ATP2B2</i>          | -1,04 | 8,07E-01 | 9,23E-01 |
| <i>A_24_P229848</i>    | -1,02 | 8,07E-01 | 9,23E-01 |
| <i>AGR2</i>            | -1,01 | 8,07E-01 | 9,23E-01 |
| <i>ZNF609</i>          | -1,01 | 8,07E-01 | 9,23E-01 |
| <i>THC2441203</i>      | -1,01 | 8,07E-01 | 9,23E-01 |
| <i>CDCA2</i>           | -1,01 | 8,07E-01 | 9,23E-01 |
| <i>C14orf122</i>       | -1,01 | 8,07E-01 | 9,23E-01 |
| <i>AT_W_3</i>          | 1,00  | 8,07E-01 | 9,23E-01 |
| <i>AT_P_3</i>          | 1,01  | 8,07E-01 | 9,23E-01 |
| <i>ENST00000328281</i> | 1,01  | 8,07E-01 | 9,23E-01 |
| <i>STX6</i>            | 1,01  | 8,07E-01 | 9,23E-01 |
| <i>UBE1DC1</i>         | 1,01  | 8,07E-01 | 9,23E-01 |
| <i>ENST00000233161</i> | 1,02  | 8,07E-01 | 9,23E-01 |
| <i>LOC650392</i>       | 1,03  | 8,07E-01 | 9,23E-01 |
| <i>YPEL4</i>           | 1,03  | 8,07E-01 | 9,23E-01 |
| <i>A_24_P460405</i>    | -1,01 | 8,08E-01 | 9,23E-01 |
| <i>AK026477</i>        | -1,01 | 8,08E-01 | 9,23E-01 |
| <i>BC067244</i>        | -1,01 | 8,08E-01 | 9,23E-01 |
| <i>CLDN6</i>           | 1,01  | 8,08E-01 | 9,23E-01 |
| <i>AFAP</i>            | -1,01 | 8,08E-01 | 9,23E-01 |
| <i>LOC375010</i>       | -1,02 | 8,08E-01 | 9,23E-01 |
| <i>FZD7</i>            | -1,03 | 8,08E-01 | 9,23E-01 |
| <i>SRM</i>             | -1,02 | 8,08E-01 | 9,23E-01 |
| <i>ST5</i>             | -1,02 | 8,08E-01 | 9,23E-01 |
| <i>ARL6IP5</i>         | -1,01 | 8,08E-01 | 9,23E-01 |
| <i>DHX40</i>           | -1,01 | 8,08E-01 | 9,23E-01 |
| <i>KIF12</i>           | 1,01  | 8,08E-01 | 9,23E-01 |
| <i>BX105146</i>        | 1,01  | 8,08E-01 | 9,23E-01 |
| <i>BQ614035</i>        | 1,01  | 8,08E-01 | 9,23E-01 |
| <i>ZFP36L2</i>         | 1,01  | 8,08E-01 | 9,23E-01 |

|                     |       |          |          |
|---------------------|-------|----------|----------|
| <i>GPC1</i>         | 1,02  | 8,08E-01 | 9,23E-01 |
| <i>GJA10</i>        | -1,01 | 8,08E-01 | 9,23E-01 |
| <i>IL28RA</i>       | -1,01 | 8,08E-01 | 9,23E-01 |
| <i>TEX11</i>        | -1,01 | 8,08E-01 | 9,23E-01 |
| <i>A_23_P343680</i> | 1,01  | 8,08E-01 | 9,23E-01 |
| <i>DLEU7</i>        | 1,01  | 8,08E-01 | 9,23E-01 |
| <i>A_23_P75192</i>  | 1,01  | 8,08E-01 | 9,24E-01 |
| <i>A_24_P186779</i> | 1,03  | 8,08E-01 | 9,24E-01 |
| <i>THC2251316</i>   | 1,03  | 8,09E-01 | 9,24E-01 |
| <i>ATP13A5</i>      | 1,01  | 8,09E-01 | 9,24E-01 |
| <i>PAX1</i>         | -1,03 | 8,09E-01 | 9,24E-01 |
| <i>LOC220594</i>    | -1,03 | 8,09E-01 | 9,24E-01 |
| <i>C2orf28</i>      | -1,02 | 8,09E-01 | 9,24E-01 |
| <i>A_23_P15233</i>  | -1,01 | 8,09E-01 | 9,24E-01 |
| <i>BF432354</i>     | -1,01 | 8,09E-01 | 9,24E-01 |
| <i>AK056171</i>     | -1,01 | 8,09E-01 | 9,24E-01 |
| <i>C20orf196</i>    | -1,01 | 8,09E-01 | 9,24E-01 |
| <i>OR1D4</i>        | -1,01 | 8,09E-01 | 9,24E-01 |
| <i>PEPP-2</i>       | -1,01 | 8,09E-01 | 9,24E-01 |
| <i>PARK2</i>        | 1,01  | 8,09E-01 | 9,24E-01 |
| <i>ATP5G3</i>       | 1,01  | 8,09E-01 | 9,24E-01 |
| <i>MGC21644</i>     | 1,01  | 8,09E-01 | 9,24E-01 |
| <i>C9orf40</i>      | 1,01  | 8,09E-01 | 9,24E-01 |
| <i>MAPK1</i>        | 1,10  | 8,09E-01 | 9,24E-01 |
| <i>S81591</i>       | -1,01 | 8,09E-01 | 9,24E-01 |
| <i>AI632010</i>     | -1,01 | 8,09E-01 | 9,24E-01 |
| <i>AP1M1</i>        | -1,01 | 8,09E-01 | 9,24E-01 |
| <i>SUFU</i>         | -1,01 | 8,09E-01 | 9,24E-01 |
| <i>ALOX5AP</i>      | -1,02 | 8,09E-01 | 9,24E-01 |
| <i>KIAA0960</i>     | -1,01 | 8,09E-01 | 9,24E-01 |
| <i>LOC339287</i>    | 1,01  | 8,09E-01 | 9,24E-01 |
| <i>AK090499</i>     | 1,01  | 8,09E-01 | 9,24E-01 |
| <i>AMZ1</i>         | 1,03  | 8,09E-01 | 9,24E-01 |
| <i>ZNF329</i>       | 1,01  | 8,10E-01 | 9,24E-01 |
| <i>SOX2OT</i>       | 1,01  | 8,10E-01 | 9,24E-01 |
| <i>BC036505</i>     | -1,01 | 8,10E-01 | 9,24E-01 |
| <i>HPS5</i>         | 1,01  | 8,10E-01 | 9,24E-01 |
| <i>A_24_P927902</i> | 1,01  | 8,10E-01 | 9,24E-01 |
| <i>THC2375714</i>   | 1,01  | 8,10E-01 | 9,24E-01 |
| <i>A_24_P16430</i>  | 1,01  | 8,10E-01 | 9,24E-01 |
| <i>W74523</i>       | 1,01  | 8,10E-01 | 9,24E-01 |
| <i>THC2288775</i>   | 1,01  | 8,10E-01 | 9,24E-01 |
| <i>A_24_P926150</i> | 1,01  | 8,10E-01 | 9,24E-01 |
| <i>FAM77C</i>       | -1,02 | 8,10E-01 | 9,24E-01 |

|                        |       |          |          |
|------------------------|-------|----------|----------|
| <i>BQ367072</i>        | -1,01 | 8,10E-01 | 9,24E-01 |
| <i>PCDHGA7</i>         | 1,01  | 8,10E-01 | 9,24E-01 |
| <i>TCF4</i>            | 1,01  | 8,10E-01 | 9,24E-01 |
| <i>HIST1H3E</i>        | 1,02  | 8,10E-01 | 9,24E-01 |
| <i>AF118077</i>        | 1,01  | 8,10E-01 | 9,24E-01 |
| <i>C8A</i>             | 1,01  | 8,11E-01 | 9,25E-01 |
| <i>A_32_P175900</i>    | 1,01  | 8,11E-01 | 9,25E-01 |
| <i>BTBD14B</i>         | -1,02 | 8,11E-01 | 9,25E-01 |
| <i>ZNF291</i>          | -1,01 | 8,11E-01 | 9,25E-01 |
| <i>AA301508</i>        | -1,01 | 8,11E-01 | 9,25E-01 |
| <i>THC2399189</i>      | -1,01 | 8,11E-01 | 9,25E-01 |
| <i>THADA</i>           | 1,01  | 8,11E-01 | 9,25E-01 |
| <i>KIAA1370</i>        | -1,01 | 8,11E-01 | 9,25E-01 |
| <i>RTTN</i>            | 1,01  | 8,11E-01 | 9,25E-01 |
| <i>BC006438</i>        | -1,01 | 8,11E-01 | 9,25E-01 |
| <i>THC2313352</i>      | -1,01 | 8,11E-01 | 9,25E-01 |
| <i>A_23_P75830</i>     | -1,01 | 8,11E-01 | 9,25E-01 |
| <i>CCNE1</i>           | 1,01  | 8,11E-01 | 9,25E-01 |
| <i>THC2281561</i>      | 1,01  | 8,11E-01 | 9,25E-01 |
| <i>DUT</i>             | -1,01 | 8,11E-01 | 9,25E-01 |
| <i>EP300</i>           | 1,10  | 8,12E-01 | 9,25E-01 |
| <i>A_32_P47474</i>     | -1,03 | 8,12E-01 | 9,25E-01 |
| <i>LEPREL2</i>         | -1,02 | 8,12E-01 | 9,25E-01 |
| <i>FLI1</i>            | -1,01 | 8,12E-01 | 9,25E-01 |
| <i>C20orf4</i>         | 1,01  | 8,12E-01 | 9,25E-01 |
| <i>ANG</i>             | 1,02  | 8,12E-01 | 9,25E-01 |
| <i>U80760</i>          | -1,01 | 8,12E-01 | 9,25E-01 |
| <i>BAHD1</i>           | -1,01 | 8,12E-01 | 9,25E-01 |
| <i>KIRREL2</i>         | 1,01  | 8,12E-01 | 9,25E-01 |
| <i>MKL2</i>            | 1,01  | 8,12E-01 | 9,26E-01 |
| <i>SPDYA</i>           | 1,01  | 8,12E-01 | 9,26E-01 |
| <i>A_24_P229807</i>    | -1,03 | 8,12E-01 | 9,26E-01 |
| <i>AI919230</i>        | -1,01 | 8,12E-01 | 9,26E-01 |
| <i>KCNS1</i>           | -1,01 | 8,12E-01 | 9,26E-01 |
| <i>SNX19</i>           | -1,01 | 8,13E-01 | 9,26E-01 |
| <i>DB134736</i>        | 1,01  | 8,13E-01 | 9,26E-01 |
| <i>MGC26733</i>        | 1,01  | 8,13E-01 | 9,26E-01 |
| <i>OR2T8</i>           | 1,01  | 8,13E-01 | 9,26E-01 |
| <i>A_24_P929985</i>    | -1,02 | 8,13E-01 | 9,26E-01 |
| <i>HRB</i>             | 1,01  | 8,13E-01 | 9,26E-01 |
| <i>ENST00000330655</i> | 1,01  | 8,13E-01 | 9,26E-01 |
| <i>A_24_P358857</i>    | -1,01 | 8,13E-01 | 9,26E-01 |
| <i>AA779434</i>        | -1,02 | 8,13E-01 | 9,26E-01 |
| <i>TBC1D7</i>          | -1,01 | 8,13E-01 | 9,26E-01 |

|                        |       |          |          |
|------------------------|-------|----------|----------|
| <i>ARMC3</i>           | -1,01 | 8,13E-01 | 9,26E-01 |
| <i>TNFSF8</i>          | 1,01  | 8,13E-01 | 9,26E-01 |
| <i>LOC644053</i>       | 1,01  | 8,13E-01 | 9,26E-01 |
| <i>SLC14A1</i>         | 1,01  | 8,13E-01 | 9,26E-01 |
| <i>CHRND</i>           | 1,01  | 8,13E-01 | 9,26E-01 |
| <i>CDC42BPG</i>        | -1,01 | 8,13E-01 | 9,26E-01 |
| <i>UNQ3035</i>         | -1,01 | 8,13E-01 | 9,26E-01 |
| <i>PUS3</i>            | 1,01  | 8,13E-01 | 9,26E-01 |
| <i>SRCRB4D</i>         | 1,01  | 8,13E-01 | 9,26E-01 |
| <i>BC039095</i>        | -1,01 | 8,13E-01 | 9,26E-01 |
| <i>AGA</i>             | 1,01  | 8,13E-01 | 9,26E-01 |
| <i>AL117403</i>        | -1,01 | 8,13E-01 | 9,26E-01 |
| <i>ENST00000344214</i> | -1,01 | 8,14E-01 | 9,26E-01 |
| <i>BC037740</i>        | 1,01  | 8,14E-01 | 9,26E-01 |
| <i>A_32_P116088</i>    | 1,01  | 8,14E-01 | 9,26E-01 |
| <i>A_24_P264143</i>    | -1,03 | 8,14E-01 | 9,26E-01 |
| <i>CCDC4</i>           | -1,03 | 8,14E-01 | 9,26E-01 |
| <i>KCTD14</i>          | -1,02 | 8,14E-01 | 9,26E-01 |
| <i>PALM2-AKAP2</i>     | -1,02 | 8,14E-01 | 9,26E-01 |
| <i>ACTG1</i>           | -1,01 | 8,14E-01 | 9,26E-01 |
| <i>AI541080</i>        | -1,01 | 8,14E-01 | 9,26E-01 |
| <i>CXorf52</i>         | -1,01 | 8,14E-01 | 9,26E-01 |
| <i>BX099599</i>        | -1,01 | 8,14E-01 | 9,26E-01 |
| <i>SMCHD1</i>          | -1,01 | 8,14E-01 | 9,26E-01 |
| <i>A_24_P918926</i>    | -1,01 | 8,14E-01 | 9,26E-01 |
| <i>CPT2</i>            | -1,01 | 8,14E-01 | 9,26E-01 |
| <i>A_32_P165163</i>    | -1,01 | 8,14E-01 | 9,26E-01 |
| <i>AA995392</i>        | -1,01 | 8,14E-01 | 9,26E-01 |
| <i>LOC441861</i>       | 1,01  | 8,14E-01 | 9,26E-01 |
| <i>POLR2J</i>          | 1,01  | 8,14E-01 | 9,26E-01 |
| <i>C5orf21</i>         | 1,01  | 8,14E-01 | 9,26E-01 |
| <i>MMP13</i>           | 1,01  | 8,14E-01 | 9,26E-01 |
| <i>THC2338051</i>      | 1,01  | 8,14E-01 | 9,26E-01 |
| <i>AI369525</i>        | 1,01  | 8,14E-01 | 9,26E-01 |
| <i>ENST00000332689</i> | 1,01  | 8,14E-01 | 9,26E-01 |
| <i>AF119861</i>        | 1,01  | 8,14E-01 | 9,26E-01 |
| <i>THC2281696</i>      | 1,01  | 8,14E-01 | 9,26E-01 |
| <i>PPIB</i>            | 1,02  | 8,14E-01 | 9,26E-01 |
| <i>MYL6</i>            | 1,03  | 8,14E-01 | 9,26E-01 |
| <i>SLCO6A1</i>         | 1,03  | 8,14E-01 | 9,26E-01 |
| <i>A_24_P298604</i>    | -1,04 | 8,14E-01 | 9,26E-01 |
| <i>THC2277571</i>      | -1,01 | 8,14E-01 | 9,26E-01 |
| <i>ADAMTS17</i>        | -1,01 | 8,15E-01 | 9,26E-01 |
| <i>AVPR1B</i>          | -1,01 | 8,15E-01 | 9,26E-01 |

|                        |       |          |          |
|------------------------|-------|----------|----------|
| <i>A_24_P915322</i>    | -1,01 | 8,15E-01 | 9,26E-01 |
| <i>CA337741</i>        | -1,01 | 8,15E-01 | 9,26E-01 |
| <i>FLJ42709</i>        | 1,01  | 8,15E-01 | 9,26E-01 |
| <i>AUH</i>             | 1,01  | 8,15E-01 | 9,26E-01 |
| <i>CCNA1</i>           | -1,01 | 8,15E-01 | 9,26E-01 |
| <i>A_32_P187518</i>    | -1,01 | 8,15E-01 | 9,26E-01 |
| <i>AK022288</i>        | -1,01 | 8,15E-01 | 9,26E-01 |
| <i>ENST00000369572</i> | -1,01 | 8,15E-01 | 9,26E-01 |
| <i>CHRD</i>            | -1,01 | 8,15E-01 | 9,26E-01 |
| <i>SRD5A2L2</i>        | -1,01 | 8,15E-01 | 9,26E-01 |
| <i>METT5D1</i>         | -1,01 | 8,15E-01 | 9,26E-01 |
| <i>MARVELD3</i>        | 1,01  | 8,15E-01 | 9,26E-01 |
| <i>ECH1</i>            | 1,01  | 8,15E-01 | 9,26E-01 |
| <i>RSBN1L</i>          | 1,01  | 8,15E-01 | 9,26E-01 |
| <i>ABCA4</i>           | -1,01 | 8,15E-01 | 9,26E-01 |
| <i>BF801387</i>        | 1,01  | 8,15E-01 | 9,26E-01 |
| <i>IK</i>              | 1,01  | 8,15E-01 | 9,26E-01 |
| <i>TRAF2</i>           | 1,01  | 8,15E-01 | 9,26E-01 |
| <i>KALRN</i>           | -1,02 | 8,16E-01 | 9,27E-01 |
| <i>PDE7B</i>           | -1,02 | 8,16E-01 | 9,27E-01 |
| <i>ADAMTS12</i>        | -1,01 | 8,15E-01 | 9,27E-01 |
| <i>CRYL1</i>           | -1,01 | 8,16E-01 | 9,27E-01 |
| <i>PIB5PA</i>          | -1,01 | 8,16E-01 | 9,27E-01 |
| <i>BE672985</i>        | -1,01 | 8,16E-01 | 9,27E-01 |
| <i>THC2392017</i>      | -1,01 | 8,16E-01 | 9,27E-01 |
| <i>AK094642</i>        | -1,01 | 8,15E-01 | 9,27E-01 |
| <i>YIPF4</i>           | -1,01 | 8,16E-01 | 9,27E-01 |
| <i>AARSD1</i>          | 1,01  | 8,15E-01 | 9,27E-01 |
| <i>BQ307884</i>        | 1,01  | 8,15E-01 | 9,27E-01 |
| <i>A_24_P915030</i>    | 1,01  | 8,16E-01 | 9,27E-01 |
| <i>HSF2BP</i>          | 1,01  | 8,16E-01 | 9,27E-01 |
| <i>THC2376282</i>      | 1,01  | 8,15E-01 | 9,27E-01 |
| <i>THC2340842</i>      | 1,01  | 8,16E-01 | 9,27E-01 |
| <i>A_24_P152566</i>    | 1,02  | 8,16E-01 | 9,27E-01 |
| <i>ADCY4</i>           | 1,02  | 8,16E-01 | 9,27E-01 |
| <i>RAB27B</i>          | 1,03  | 8,15E-01 | 9,27E-01 |
| <i>KRT23</i>           | 1,03  | 8,16E-01 | 9,27E-01 |
| <i>AF130063</i>        | -1,01 | 8,16E-01 | 9,27E-01 |
| <i>THC2385918</i>      | 1,01  | 8,16E-01 | 9,27E-01 |
| <i>STATIP1</i>         | -1,01 | 8,16E-01 | 9,27E-01 |
| <i>TMEM134</i>         | 1,01  | 8,16E-01 | 9,27E-01 |
| <i>A_24_P307205</i>    | -1,01 | 8,16E-01 | 9,27E-01 |
| <i>KIAA0319L</i>       | 1,01  | 8,16E-01 | 9,27E-01 |
| <i>ENST00000220507</i> | -1,04 | 8,16E-01 | 9,27E-01 |

|                        |       |          |          |
|------------------------|-------|----------|----------|
| <i>DCTN3</i>           | 1,01  | 8,16E-01 | 9,27E-01 |
| <i>CSNK1D</i>          | -1,01 | 8,16E-01 | 9,27E-01 |
| <i>THC2312515</i>      | 1,01  | 8,17E-01 | 9,27E-01 |
| <i>MGC45438</i>        | 1,03  | 8,16E-01 | 9,27E-01 |
| <i>HK2</i>             | -1,02 | 8,17E-01 | 9,27E-01 |
| <i>LST-3TM12</i>       | -1,01 | 8,17E-01 | 9,27E-01 |
| <i>BC020920</i>        | -1,01 | 8,17E-01 | 9,27E-01 |
| <i>THC2437039</i>      | 1,01  | 8,17E-01 | 9,27E-01 |
| <i>AL134462</i>        | 1,01  | 8,17E-01 | 9,27E-01 |
| <i>GREM1</i>           | 1,02  | 8,17E-01 | 9,27E-01 |
| <i>A_24_P675947</i>    | -1,03 | 8,17E-01 | 9,27E-01 |
| <i>BE138567</i>        | -1,01 | 8,17E-01 | 9,27E-01 |
| <i>THC2403845</i>      | -1,01 | 8,17E-01 | 9,27E-01 |
| <i>A_24_P367100</i>    | -1,01 | 8,17E-01 | 9,27E-01 |
| <i>LOC389634</i>       | -1,01 | 8,17E-01 | 9,27E-01 |
| <i>OXCT1</i>           | 1,01  | 8,17E-01 | 9,27E-01 |
| <i>LOC285548</i>       | 1,02  | 8,17E-01 | 9,27E-01 |
| <i>CR612178</i>        | -1,01 | 8,17E-01 | 9,27E-01 |
| <i>MSLN</i>            | -1,01 | 8,17E-01 | 9,27E-01 |
| <i>BMF</i>             | -1,02 | 8,17E-01 | 9,27E-01 |
| <i>AL713714</i>        | 1,01  | 8,17E-01 | 9,27E-01 |
| <i>FLJ32786</i>        | 1,01  | 8,17E-01 | 9,27E-01 |
| <i>A_24_P521318</i>    | 1,01  | 8,17E-01 | 9,27E-01 |
| <i>C20orf114</i>       | -1,02 | 8,17E-01 | 9,27E-01 |
| <i>TGM7</i>            | 1,01  | 8,17E-01 | 9,27E-01 |
| <i>RGS8</i>            | 1,02  | 8,17E-01 | 9,27E-01 |
| <i>OR2A25</i>          | -1,01 | 8,18E-01 | 9,27E-01 |
| <i>A_24_P647965</i>    | 1,01  | 8,17E-01 | 9,27E-01 |
| <i>ARMETL1</i>         | -1,01 | 8,18E-01 | 9,27E-01 |
| <i>PRAMEF2</i>         | 1,01  | 8,18E-01 | 9,27E-01 |
| <i>LOC57399</i>        | -1,01 | 8,18E-01 | 9,27E-01 |
| <i>C6orf199</i>        | 1,01  | 8,18E-01 | 9,27E-01 |
| <i>LOC441448</i>       | 1,01  | 8,18E-01 | 9,27E-01 |
| <i>ENST00000327347</i> | 1,01  | 8,18E-01 | 9,27E-01 |
| <i>LRRC22</i>          | 1,01  | 8,18E-01 | 9,27E-01 |
| <i>RBM38</i>           | 1,03  | 8,18E-01 | 9,27E-01 |
| <i>PFTK1</i>           | 1,02  | 8,18E-01 | 9,27E-01 |
| <i>MGC15705</i>        | -1,01 | 8,18E-01 | 9,27E-01 |
| <i>ENST00000342830</i> | -1,01 | 8,18E-01 | 9,27E-01 |
| <i>A_24_P923553</i>    | -1,01 | 8,18E-01 | 9,27E-01 |
| <i>VPS37A</i>          | -1,01 | 8,18E-01 | 9,27E-01 |
| <i>BC070369</i>        | 1,01  | 8,18E-01 | 9,27E-01 |
| <i>A_24_P916743</i>    | 1,01  | 8,18E-01 | 9,27E-01 |
| <i>KIAA1333</i>        | 1,01  | 8,18E-01 | 9,27E-01 |



|                        |       |          |          |
|------------------------|-------|----------|----------|
| <i>MTMR11</i>          | 1,01  | 8,18E-01 | 9,27E-01 |
| <i>GIN3</i>            | 1,01  | 8,18E-01 | 9,27E-01 |
| <i>OR6W1P</i>          | -1,01 | 8,18E-01 | 9,28E-01 |
| <i>SLC6A15</i>         | -1,01 | 8,18E-01 | 9,28E-01 |
| <i>ENST00000372493</i> | -1,01 | 8,19E-01 | 9,28E-01 |
| <i>THC2282221</i>      | 1,01  | 8,19E-01 | 9,28E-01 |
| <i>RNF39</i>           | 1,01  | 8,19E-01 | 9,28E-01 |
| <i>A_24_P127621</i>    | -1,02 | 8,19E-01 | 9,28E-01 |
| <i>ENST00000274695</i> | -1,01 | 8,19E-01 | 9,28E-01 |
| <i>PDE1B</i>           | -1,01 | 8,19E-01 | 9,28E-01 |
| <i>S51112</i>          | -1,01 | 8,19E-01 | 9,28E-01 |
| <i>BX102076</i>        | 1,01  | 8,19E-01 | 9,28E-01 |
| <i>PSMD1</i>           | 1,01  | 8,19E-01 | 9,28E-01 |
| <i>ENST00000358618</i> | 1,01  | 8,19E-01 | 9,28E-01 |
| <i>LOC340286</i>       | 1,01  | 8,19E-01 | 9,28E-01 |
| <i>A_24_P93051</i>     | 1,01  | 8,19E-01 | 9,28E-01 |
| <i>RAI14</i>           | 1,02  | 8,19E-01 | 9,28E-01 |
| <i>HAVCR1</i>          | 1,01  | 8,19E-01 | 9,28E-01 |
| <i>THC2283727</i>      | 1,01  | 8,19E-01 | 9,28E-01 |
| <i>C12orf27</i>        | 1,01  | 8,19E-01 | 9,28E-01 |
| <i>INA</i>             | 1,01  | 8,19E-01 | 9,28E-01 |
| <i>TIMP2</i>           | -1,02 | 8,19E-01 | 9,28E-01 |
| <i>SLC35A4</i>         | -1,01 | 8,19E-01 | 9,28E-01 |
| <i>ENST00000361800</i> | 1,01  | 8,20E-01 | 9,28E-01 |
| <i>AA343139</i>        | 1,01  | 8,20E-01 | 9,28E-01 |
| <i>FLJ36492</i>        | -1,03 | 8,20E-01 | 9,28E-01 |
| <i>THC2312302</i>      | 1,01  | 8,20E-01 | 9,28E-01 |
| <i>BG259864</i>        | -1,01 | 8,20E-01 | 9,28E-01 |
| <i>TAF11</i>           | 1,01  | 8,20E-01 | 9,28E-01 |
| <i>A_23_P207881</i>    | 1,01  | 8,20E-01 | 9,28E-01 |
| <i>A_24_P862251</i>    | 1,01  | 8,20E-01 | 9,28E-01 |
| <i>TUBG2</i>           | 1,01  | 8,20E-01 | 9,28E-01 |
| <i>AI819757</i>        | 1,02  | 8,20E-01 | 9,28E-01 |
| <i>ENST00000371253</i> | 1,01  | 8,20E-01 | 9,28E-01 |
| <i>PTH</i>             | -1,01 | 8,20E-01 | 9,28E-01 |
| <i>PDLIM5</i>          | -1,02 | 8,20E-01 | 9,28E-01 |
| <i>C15orf45</i>        | -1,01 | 8,20E-01 | 9,28E-01 |
| <i>RC7</i>             | -1,01 | 8,20E-01 | 9,28E-01 |
| <i>NEK2</i>            | 1,01  | 8,20E-01 | 9,28E-01 |
| <i>FLJ21075</i>        | 1,01  | 8,20E-01 | 9,28E-01 |
| <i>ENST00000242848</i> | -1,01 | 8,20E-01 | 9,28E-01 |
| <i>THC2410524</i>      | -1,01 | 8,20E-01 | 9,28E-01 |
| <i>NEU3</i>            | 1,01  | 8,20E-01 | 9,28E-01 |
| <i>A_32_P52144</i>     | 1,02  | 8,20E-01 | 9,28E-01 |

|                        |       |          |          |
|------------------------|-------|----------|----------|
| <i>FLJ10038</i>        | -1,01 | 8,20E-01 | 9,28E-01 |
| <i>THC2449383</i>      | 1,02  | 8,20E-01 | 9,28E-01 |
| <i>CML2</i>            | -1,01 | 8,21E-01 | 9,28E-01 |
| <i>A_32_P13442</i>     | -1,01 | 8,21E-01 | 9,28E-01 |
| <i>WDR22</i>           | -1,01 | 8,21E-01 | 9,28E-01 |
| <i>TDRKH</i>           | 1,01  | 8,21E-01 | 9,28E-01 |
| <i>A_24_P213073</i>    | 1,01  | 8,21E-01 | 9,28E-01 |
| <i>C14orf144</i>       | 1,01  | 8,21E-01 | 9,28E-01 |
| <i>A_24_P717462</i>    | 1,02  | 8,21E-01 | 9,28E-01 |
| <i>THAP11</i>          | 1,01  | 8,21E-01 | 9,28E-01 |
| <i>PDE2A</i>           | 1,02  | 8,21E-01 | 9,28E-01 |
| <i>MFAP2</i>           | 1,02  | 8,21E-01 | 9,28E-01 |
| <i>A_24_P152775</i>    | -1,02 | 8,21E-01 | 9,29E-01 |
| <i>BC030115</i>        | -1,02 | 8,21E-01 | 9,29E-01 |
| <i>ENST00000270031</i> | -1,01 | 8,21E-01 | 9,29E-01 |
| <i>X04931</i>          | -1,01 | 8,21E-01 | 9,29E-01 |
| <i>BC039381</i>        | 1,01  | 8,21E-01 | 9,29E-01 |
| <i>A_24_P935492</i>    | 1,01  | 8,21E-01 | 9,29E-01 |
| <i>NME4</i>            | 1,01  | 8,21E-01 | 9,29E-01 |
| <i>PCDH17</i>          | 1,02  | 8,21E-01 | 9,29E-01 |
| <i>CD69</i>            | 1,06  | 8,21E-01 | 9,29E-01 |
| <i>CATR1</i>           | 1,01  | 8,21E-01 | 9,29E-01 |
| <i>SRCAP</i>           | -1,01 | 8,21E-01 | 9,29E-01 |
| <i>C9orf84</i>         | 1,01  | 8,21E-01 | 9,29E-01 |
| <i>AA453520</i>        | -1,01 | 8,21E-01 | 9,29E-01 |
| <i>AF339766</i>        | 1,01  | 8,21E-01 | 9,29E-01 |
| <i>WSB1</i>            | -1,01 | 8,21E-01 | 9,29E-01 |
| <i>HOXB9</i>           | 1,01  | 8,22E-01 | 9,29E-01 |
| <i>ENST00000328043</i> | -1,03 | 8,22E-01 | 9,29E-01 |
| <i>CLIPR-59</i>        | -1,02 | 8,22E-01 | 9,29E-01 |
| <i>SLC25A37</i>        | -1,01 | 8,22E-01 | 9,29E-01 |
| <i>RAB1A</i>           | -1,01 | 8,22E-01 | 9,29E-01 |
| <i>CHRNA1</i>          | -1,01 | 8,22E-01 | 9,29E-01 |
| <i>UGT1A8</i>          | -1,01 | 8,22E-01 | 9,29E-01 |
| <i>TDRD3</i>           | 1,01  | 8,22E-01 | 9,29E-01 |
| <i>FLJ33996</i>        | 1,01  | 8,22E-01 | 9,29E-01 |
| <i>THC2338243</i>      | 1,01  | 8,22E-01 | 9,29E-01 |
| <i>FCGR3B</i>          | 1,02  | 8,22E-01 | 9,29E-01 |
| <i>KIAA1920</i>        | -1,01 | 8,22E-01 | 9,29E-01 |
| <i>CD47</i>            | -1,01 | 8,22E-01 | 9,29E-01 |
| <i>POLR2I</i>          | 1,01  | 8,22E-01 | 9,29E-01 |
| <i>GDF1</i>            | 1,01  | 8,22E-01 | 9,29E-01 |
| <i>A_24_P711050</i>    | 1,01  | 8,22E-01 | 9,29E-01 |
| <i>P11</i>             | 1,02  | 8,22E-01 | 9,29E-01 |

|                        |       |          |          |
|------------------------|-------|----------|----------|
| <i>A_32_P36596</i>     | -1,01 | 8,23E-01 | 9,29E-01 |
| <i>TMEM87B</i>         | 1,01  | 8,23E-01 | 9,29E-01 |
| <i>KRTAP4-5</i>        | 1,01  | 8,23E-01 | 9,29E-01 |
| <i>ENST00000367386</i> | 1,01  | 8,23E-01 | 9,29E-01 |
| <i>ARRB2</i>           | 1,01  | 8,23E-01 | 9,29E-01 |
| <i>ALS2</i>            | -1,01 | 8,23E-01 | 9,29E-01 |
| <i>AW504569</i>        | -1,01 | 8,23E-01 | 9,30E-01 |
| <i>THC2318230</i>      | 1,01  | 8,23E-01 | 9,30E-01 |
| <i>BC035392</i>        | 1,01  | 8,23E-01 | 9,30E-01 |
| <i>MAGEB10</i>         | -1,01 | 8,23E-01 | 9,30E-01 |
| <i>A_24_P916338</i>    | 1,01  | 8,23E-01 | 9,30E-01 |
| <i>THC2338229</i>      | 1,02  | 8,23E-01 | 9,30E-01 |
| <i>CTSK</i>            | -1,03 | 8,23E-01 | 9,30E-01 |
| <i>LASP1</i>           | -1,01 | 8,23E-01 | 9,30E-01 |
| <i>A_24_P7330</i>      | 1,01  | 8,23E-01 | 9,30E-01 |
| <i>OR6N1</i>           | 1,01  | 8,23E-01 | 9,30E-01 |
| <i>BC038749</i>        | 1,02  | 8,23E-01 | 9,30E-01 |
| <i>AF078533</i>        | 1,01  | 8,23E-01 | 9,30E-01 |
| <i>FLJ31958</i>        | -1,01 | 8,24E-01 | 9,30E-01 |
| <i>CR606637</i>        | -1,01 | 8,24E-01 | 9,30E-01 |
| <i>LYAR</i>            | -1,01 | 8,24E-01 | 9,30E-01 |
| <i>LOC198437</i>       | -1,02 | 8,24E-01 | 9,30E-01 |
| <i>ANAPC13</i>         | -1,01 | 8,24E-01 | 9,30E-01 |
| <i>ESPL1</i>           | -1,01 | 8,24E-01 | 9,30E-01 |
| <i>A_32_P209924</i>    | -1,01 | 8,24E-01 | 9,30E-01 |
| <i>C3orf16</i>         | -1,03 | 8,24E-01 | 9,30E-01 |
| <i>SF3A3</i>           | 1,01  | 8,24E-01 | 9,30E-01 |
| <i>A_24_P367063</i>    | -1,01 | 8,24E-01 | 9,31E-01 |
| <i>TJP3</i>            | 1,01  | 8,24E-01 | 9,31E-01 |
| <i>SLC27A6</i>         | 1,04  | 8,24E-01 | 9,31E-01 |
| <i>ADRBK1</i>          | 1,01  | 8,24E-01 | 9,31E-01 |
| <i>C3orf10</i>         | 1,01  | 8,25E-01 | 9,31E-01 |
| <i>C20orf91</i>        | -1,01 | 8,25E-01 | 9,31E-01 |
| <i>HNF4A</i>           | 1,01  | 8,25E-01 | 9,31E-01 |
| <i>C16orf35</i>        | -1,01 | 8,25E-01 | 9,31E-01 |
| <i>ENST00000369381</i> | 1,02  | 8,25E-01 | 9,31E-01 |
| <i>LIMA1</i>           | -1,02 | 8,25E-01 | 9,31E-01 |
| <i>ISYNA1</i>          | -1,02 | 8,25E-01 | 9,31E-01 |
| <i>ZNF195</i>          | -1,01 | 8,25E-01 | 9,31E-01 |
| <i>LOC647195</i>       | -1,01 | 8,25E-01 | 9,31E-01 |
| <i>ENST00000319347</i> | -1,01 | 8,25E-01 | 9,31E-01 |
| <i>ZNF622</i>          | -1,01 | 8,25E-01 | 9,31E-01 |
| <i>BQ286694</i>        | -1,01 | 8,25E-01 | 9,31E-01 |
| <i>A_24_P918458</i>    | -1,01 | 8,25E-01 | 9,31E-01 |

|                        |       |          |          |
|------------------------|-------|----------|----------|
| <i>GCC1</i>            | 1,01  | 8,25E-01 | 9,31E-01 |
| <i>HSD11B1L</i>        | 1,01  | 8,25E-01 | 9,31E-01 |
| <i>THC2347161</i>      | 1,01  | 8,25E-01 | 9,31E-01 |
| <i>EYA4</i>            | 1,04  | 8,25E-01 | 9,31E-01 |
| <i>E1A_r60_n9</i>      | 1,11  | 8,25E-01 | 9,31E-01 |
| <i>THC2381568</i>      | -1,01 | 8,26E-01 | 9,31E-01 |
| <i>CMKLR1</i>          | 1,02  | 8,26E-01 | 9,31E-01 |
| <i>THC2285420</i>      | -1,01 | 8,26E-01 | 9,31E-01 |
| <i>FCHO2</i>           | -1,01 | 8,26E-01 | 9,31E-01 |
| <i>ADCY8</i>           | -1,01 | 8,26E-01 | 9,31E-01 |
| <i>ENST00000382123</i> | -1,02 | 8,26E-01 | 9,31E-01 |
| <i>AMPH</i>            | -1,01 | 8,26E-01 | 9,31E-01 |
| <i>KIAA1486</i>        | -1,01 | 8,26E-01 | 9,31E-01 |
| <i>MKL1</i>            | -1,01 | 8,26E-01 | 9,31E-01 |
| <i>MSC</i>             | -1,01 | 8,26E-01 | 9,31E-01 |
| <i>A_24_P32836</i>     | -1,01 | 8,26E-01 | 9,31E-01 |
| <i>PAR5</i>            | -1,01 | 8,27E-01 | 9,31E-01 |
| <i>ZBTB4</i>           | -1,01 | 8,26E-01 | 9,31E-01 |
| <i>MTMR9</i>           | -1,01 | 8,27E-01 | 9,31E-01 |
| <i>THC2340908</i>      | -1,01 | 8,26E-01 | 9,31E-01 |
| <i>FGF19</i>           | -1,01 | 8,26E-01 | 9,31E-01 |
| <i>AA131571</i>        | -1,01 | 8,27E-01 | 9,31E-01 |
| <i>THC2455558</i>      | -1,01 | 8,27E-01 | 9,31E-01 |
| <i>C10orf91</i>        | -1,01 | 8,26E-01 | 9,31E-01 |
| <i>AT_L_M</i>          | -1,00 | 8,27E-01 | 9,31E-01 |
| <i>LOC440888</i>       | 1,01  | 8,26E-01 | 9,31E-01 |
| <i>A_24_P921947</i>    | 1,01  | 8,26E-01 | 9,31E-01 |
| <i>A_32_P10665</i>     | 1,01  | 8,26E-01 | 9,31E-01 |
| <i>ENST00000377022</i> | 1,01  | 8,26E-01 | 9,31E-01 |
| <i>OR2A7</i>           | 1,01  | 8,27E-01 | 9,31E-01 |
| <i>CRISP1</i>          | 1,01  | 8,27E-01 | 9,31E-01 |
| <i>HOOK1</i>           | 1,01  | 8,27E-01 | 9,31E-01 |
| <i>A_24_P384029</i>    | 1,01  | 8,27E-01 | 9,31E-01 |
| <i>AK130207</i>        | 1,04  | 8,26E-01 | 9,31E-01 |
| <i>PTTG1</i>           | 1,02  | 8,27E-01 | 9,32E-01 |
| <i>MAP3K9</i>          | -1,01 | 8,27E-01 | 9,32E-01 |
| <i>C4orf20</i>         | -1,01 | 8,27E-01 | 9,32E-01 |
| <i>A_23_P136959</i>    | -1,01 | 8,27E-01 | 9,32E-01 |
| <i>EMILIN2</i>         | -1,02 | 8,27E-01 | 9,32E-01 |
| <i>C6orf97</i>         | -1,01 | 8,27E-01 | 9,32E-01 |
| <i>AARS</i>            | -1,01 | 8,28E-01 | 9,32E-01 |
| <i>C12orf41</i>        | -1,01 | 8,27E-01 | 9,32E-01 |
| <i>SH3KBP1</i>         | 1,01  | 8,28E-01 | 9,32E-01 |
| <i>CCNB1IP1</i>        | -1,01 | 8,28E-01 | 9,32E-01 |

|                        |       |          |          |
|------------------------|-------|----------|----------|
| <i>BU686948</i>        | -1,01 | 8,28E-01 | 9,32E-01 |
| <i>U56433</i>          | 1,01  | 8,28E-01 | 9,32E-01 |
| <i>NPAT</i>            | -1,01 | 8,28E-01 | 9,32E-01 |
| <i>TNFRSF13C</i>       | -1,02 | 8,28E-01 | 9,32E-01 |
| <i>OR1C1</i>           | -1,01 | 8,28E-01 | 9,32E-01 |
| <i>A_24_P698698</i>    | -1,01 | 8,28E-01 | 9,32E-01 |
| <i>LOC497661</i>       | 1,01  | 8,28E-01 | 9,32E-01 |
| <i>PHF13</i>           | -1,01 | 8,28E-01 | 9,32E-01 |
| <i>PAGE5</i>           | -1,01 | 8,28E-01 | 9,32E-01 |
| <i>ENST00000381800</i> | 1,01  | 8,28E-01 | 9,32E-01 |
| <i>A_32_P327750</i>    | 1,01  | 8,28E-01 | 9,32E-01 |
| <i>AF090902</i>        | 1,01  | 8,28E-01 | 9,32E-01 |
| <i>HOXD10</i>          | -1,02 | 8,28E-01 | 9,32E-01 |
| <i>ALB</i>             | -1,01 | 8,28E-01 | 9,32E-01 |
| <i>C17orf57</i>        | -1,01 | 8,29E-01 | 9,32E-01 |
| <i>BX372426</i>        | 1,01  | 8,28E-01 | 9,32E-01 |
| <i>B4GALT7</i>         | 1,01  | 8,28E-01 | 9,32E-01 |
| <i>FKBP1A</i>          | 1,01  | 8,28E-01 | 9,32E-01 |
| <i>RTP3</i>            | 1,01  | 8,28E-01 | 9,32E-01 |
| <i>AI760454</i>        | 1,01  | 8,28E-01 | 9,32E-01 |
| <i>GSS</i>             | 1,01  | 8,28E-01 | 9,32E-01 |
| <i>DA711948</i>        | 1,02  | 8,28E-01 | 9,32E-01 |
| <i>A_24_P464580</i>    | -1,01 | 8,29E-01 | 9,32E-01 |
| <i>GAL3ST4</i>         | -1,01 | 8,29E-01 | 9,32E-01 |
| <i>AF085877</i>        | -1,01 | 8,29E-01 | 9,32E-01 |
| <i>AK093927</i>        | 1,01  | 8,29E-01 | 9,32E-01 |
| <i>AK023862</i>        | 1,01  | 8,29E-01 | 9,32E-01 |
| <i>C17orf48</i>        | 1,01  | 8,29E-01 | 9,32E-01 |
| <i>C1orf188</i>        | 1,01  | 8,29E-01 | 9,32E-01 |
| <i>C9orf93</i>         | -1,01 | 8,29E-01 | 9,32E-01 |
| <i>PGM1</i>            | -1,01 | 8,29E-01 | 9,33E-01 |
| <i>PTPN4</i>           | -1,01 | 8,29E-01 | 9,33E-01 |
| <i>A_24_P298143</i>    | -1,01 | 8,29E-01 | 9,33E-01 |
| <i>THC2455370</i>      | -1,01 | 8,29E-01 | 9,33E-01 |
| <i>AF090895</i>        | -1,01 | 8,29E-01 | 9,33E-01 |
| <i>CRTAP</i>           | -1,01 | 8,29E-01 | 9,33E-01 |
| <i>PPP1R7</i>          | -1,01 | 8,29E-01 | 9,33E-01 |
| <i>SLCO4C1</i>         | -1,01 | 8,29E-01 | 9,33E-01 |
| <i>THC2343458</i>      | 1,01  | 8,29E-01 | 9,33E-01 |
| <i>PAP2D</i>           | 1,01  | 8,29E-01 | 9,33E-01 |
| <i>LACTB2</i>          | 1,01  | 8,29E-01 | 9,33E-01 |
| <i>AL049404</i>        | 1,01  | 8,29E-01 | 9,33E-01 |
| <i>PIGS</i>            | 1,01  | 8,29E-01 | 9,33E-01 |
| <i>THC2455075</i>      | 1,02  | 8,29E-01 | 9,33E-01 |

|                        |       |          |          |
|------------------------|-------|----------|----------|
| <i>FOLR3</i>           | 1,03  | 8,29E-01 | 9,33E-01 |
| <i>NPC1L1</i>          | -1,01 | 8,29E-01 | 9,33E-01 |
| <i>NAALADL1</i>        | 1,01  | 8,30E-01 | 9,33E-01 |
| <i>ZNRF3</i>           | -1,02 | 8,30E-01 | 9,33E-01 |
| <i>ZMYND15</i>         | -1,01 | 8,30E-01 | 9,33E-01 |
| <i>MS4A1</i>           | 1,01  | 8,30E-01 | 9,33E-01 |
| <i>ACTB</i>            | 1,03  | 8,30E-01 | 9,33E-01 |
| <i>CV342468</i>        | -1,01 | 8,30E-01 | 9,33E-01 |
| <i>AF116603</i>        | -1,01 | 8,30E-01 | 9,33E-01 |
| <i>ANAPC11</i>         | -1,01 | 8,30E-01 | 9,33E-01 |
| <i>ENST00000302932</i> | -1,01 | 8,30E-01 | 9,33E-01 |
| <i>UCHL1</i>           | 1,02  | 8,30E-01 | 9,33E-01 |
| <i>SPINK5L3</i>        | 1,03  | 8,30E-01 | 9,33E-01 |
| <i>A_24_P33525</i>     | -1,02 | 8,30E-01 | 9,33E-01 |
| <i>A_24_P464701</i>    | 1,01  | 8,30E-01 | 9,33E-01 |
| <i>ENST00000380494</i> | 1,01  | 8,30E-01 | 9,33E-01 |
| <i>EVI2B</i>           | 1,01  | 8,30E-01 | 9,33E-01 |
| <i>A_24_P297798</i>    | -1,01 | 8,30E-01 | 9,33E-01 |
| <i>MAL2</i>            | -1,07 | 8,31E-01 | 9,33E-01 |
| <i>CLDN1</i>           | -1,02 | 8,30E-01 | 9,33E-01 |
| <i>LOC146429</i>       | -1,02 | 8,31E-01 | 9,33E-01 |
| <i>OR7D2</i>           | -1,02 | 8,31E-01 | 9,33E-01 |
| <i>ASAH1</i>           | -1,01 | 8,31E-01 | 9,33E-01 |
| <i>A_24_P926799</i>    | -1,01 | 8,31E-01 | 9,33E-01 |
| <i>AU158345</i>        | -1,01 | 8,31E-01 | 9,33E-01 |
| <i>A_32_P117908</i>    | -1,01 | 8,31E-01 | 9,33E-01 |
| <i>BC030685</i>        | -1,01 | 8,31E-01 | 9,33E-01 |
| <i>GDF5</i>            | -1,01 | 8,31E-01 | 9,33E-01 |
| <i>ARCN1</i>           | -1,01 | 8,31E-01 | 9,33E-01 |
| <i>GDAP2</i>           | -1,01 | 8,31E-01 | 9,33E-01 |
| <i>RACGAP1</i>         | -1,01 | 8,30E-01 | 9,33E-01 |
| <i>MYBBP1A</i>         | -1,01 | 8,31E-01 | 9,33E-01 |
| <i>ELAVL3</i>          | -1,01 | 8,31E-01 | 9,33E-01 |
| <i>XAB1</i>            | -1,01 | 8,31E-01 | 9,33E-01 |
| <i>REN</i>             | -1,01 | 8,30E-01 | 9,33E-01 |
| <i>BC033990</i>        | 1,01  | 8,31E-01 | 9,33E-01 |
| <i>THC2378715</i>      | 1,01  | 8,31E-01 | 9,33E-01 |
| <i>BF858887</i>        | 1,01  | 8,30E-01 | 9,33E-01 |
| <i>UQCRC2</i>          | 1,01  | 8,31E-01 | 9,33E-01 |
| <i>LOC260339</i>       | 1,01  | 8,31E-01 | 9,33E-01 |
| <i>PTTG1IP</i>         | 1,01  | 8,31E-01 | 9,33E-01 |
| <i>POMGNT1</i>         | 1,01  | 8,31E-01 | 9,33E-01 |
| <i>GZMM</i>            | 1,01  | 8,31E-01 | 9,33E-01 |
| <i>FLJ38973</i>        | 1,01  | 8,31E-01 | 9,33E-01 |

|                        |       |          |          |
|------------------------|-------|----------|----------|
| <i>SNAP23</i>          | 1,01  | 8,30E-01 | 9,33E-01 |
| <i>AK096020</i>        | 1,01  | 8,31E-01 | 9,33E-01 |
| <i>FOXP4</i>           | 1,01  | 8,31E-01 | 9,33E-01 |
| <i>CLEC1B</i>          | 1,01  | 8,30E-01 | 9,33E-01 |
| <i>F02250</i>          | 1,01  | 8,30E-01 | 9,33E-01 |
| <i>AF090887</i>        | 1,01  | 8,31E-01 | 9,33E-01 |
| <i>HIST1H4D</i>        | 1,01  | 8,31E-01 | 9,33E-01 |
| <i>A_24_P32715</i>     | 1,02  | 8,31E-01 | 9,33E-01 |
| <i>SGCA</i>            | 1,03  | 8,31E-01 | 9,33E-01 |
| <i>ZNF750</i>          | 1,05  | 8,31E-01 | 9,33E-01 |
| <i>LOC146439</i>       | -1,04 | 8,31E-01 | 9,33E-01 |
| <i>C22orf23</i>        | -1,01 | 8,31E-01 | 9,33E-01 |
| <i>LIN9</i>            | -1,01 | 8,31E-01 | 9,33E-01 |
| <i>LOC286044</i>       | 1,02  | 8,31E-01 | 9,33E-01 |
| <i>LARP5</i>           | 1,01  | 8,31E-01 | 9,33E-01 |
| <i>PRPSAP1</i>         | -1,01 | 8,31E-01 | 9,33E-01 |
| <i>LDB2</i>            | 1,01  | 8,32E-01 | 9,33E-01 |
| <i>ENST00000369911</i> | 1,01  | 8,32E-01 | 9,33E-01 |
| <i>GNB5</i>            | 1,01  | 8,32E-01 | 9,33E-01 |
| <i>ATP6V1H</i>         | 1,01  | 8,32E-01 | 9,33E-01 |
| <i>A_24_P943723</i>    | -1,01 | 8,32E-01 | 9,33E-01 |
| <i>THC2373072</i>      | 1,01  | 8,32E-01 | 9,33E-01 |
| <i>CXADR</i>           | -1,03 | 8,32E-01 | 9,33E-01 |
| <i>ENST00000313760</i> | -1,01 | 8,32E-01 | 9,33E-01 |
| <i>RCE1</i>            | -1,01 | 8,32E-01 | 9,33E-01 |
| <i>LOC400120</i>       | 1,02  | 8,32E-01 | 9,34E-01 |
| <i>B4GALT4</i>         | -1,01 | 8,32E-01 | 9,34E-01 |
| <i>LOC285735</i>       | -1,01 | 8,32E-01 | 9,34E-01 |
| <i>FLJ32679</i>        | 1,01  | 8,33E-01 | 9,34E-01 |
| <i>SBP1</i>            | 1,01  | 8,33E-01 | 9,34E-01 |
| <i>CLSPN</i>           | -1,01 | 8,33E-01 | 9,34E-01 |
| <i>C1QTNF9</i>         | -1,01 | 8,33E-01 | 9,34E-01 |
| <i>ELMO3</i>           | -1,01 | 8,33E-01 | 9,34E-01 |
| <i>C16orf54</i>        | -1,01 | 8,33E-01 | 9,34E-01 |
| <i>MGC27382</i>        | -1,01 | 8,33E-01 | 9,34E-01 |
| <i>A_24_P936953</i>    | 1,01  | 8,33E-01 | 9,34E-01 |
| <i>ENST00000359050</i> | 1,01  | 8,33E-01 | 9,34E-01 |
| <i>TRIM25</i>          | 1,01  | 8,33E-01 | 9,34E-01 |
| <i>AF390550</i>        | 1,01  | 8,33E-01 | 9,34E-01 |
| <i>FAM8A1</i>          | -1,01 | 8,33E-01 | 9,34E-01 |
| <i>MLPH</i>            | -1,04 | 8,33E-01 | 9,34E-01 |
| <i>A_23_P129258</i>    | -1,01 | 8,33E-01 | 9,34E-01 |
| <i>ZNF721</i>          | -1,01 | 8,33E-01 | 9,34E-01 |
| <i>VCP</i>             | -1,01 | 8,33E-01 | 9,34E-01 |

|                        |       |          |          |
|------------------------|-------|----------|----------|
| <i>PAGE2B</i>          | 1,01  | 8,33E-01 | 9,34E-01 |
| <i>CR627415</i>        | 1,01  | 8,33E-01 | 9,34E-01 |
| <i>NXPH4</i>           | 1,01  | 8,33E-01 | 9,34E-01 |
| <i>A_24_P332151</i>    | 1,01  | 8,33E-01 | 9,34E-01 |
| <i>MPDZ</i>            | 1,01  | 8,33E-01 | 9,34E-01 |
| <i>A_24_P916782</i>    | -1,01 | 8,33E-01 | 9,34E-01 |
| <i>PH-4</i>            | 1,01  | 8,34E-01 | 9,34E-01 |
| <i>PGR</i>             | -1,03 | 8,34E-01 | 9,34E-01 |
| <i>SURF4</i>           | -1,01 | 8,34E-01 | 9,34E-01 |
| <i>THC2363646</i>      | -1,01 | 8,34E-01 | 9,34E-01 |
| <i>NR2E3</i>           | 1,01  | 8,34E-01 | 9,34E-01 |
| <i>LMO2</i>            | -1,02 | 8,34E-01 | 9,34E-01 |
| <i>ENST00000377836</i> | -1,02 | 8,34E-01 | 9,34E-01 |
| <i>STXBP3</i>          | 1,01  | 8,34E-01 | 9,34E-01 |
| <i>C11orf69</i>        | 1,01  | 8,34E-01 | 9,34E-01 |
| <i>CDKL3</i>           | 1,01  | 8,34E-01 | 9,34E-01 |
| <i>BIK</i>             | 1,01  | 8,34E-01 | 9,35E-01 |
| <i>HTR7P</i>           | 1,01  | 8,34E-01 | 9,35E-01 |
| <i>MORF4</i>           | 1,02  | 8,34E-01 | 9,35E-01 |
| <i>AI942297</i>        | -1,01 | 8,34E-01 | 9,35E-01 |
| <i>WDR74</i>           | -1,01 | 8,34E-01 | 9,35E-01 |
| <i>CR606347</i>        | 1,01  | 8,34E-01 | 9,35E-01 |
| <i>MAP1S</i>           | 1,01  | 8,34E-01 | 9,35E-01 |
| <i>SH3BP1</i>          | 1,01  | 8,35E-01 | 9,35E-01 |
| <i>ASB10</i>           | -1,01 | 8,35E-01 | 9,35E-01 |
| <i>OSBP2</i>           | -1,01 | 8,35E-01 | 9,35E-01 |
| <i>A_24_P616082</i>    | 1,02  | 8,35E-01 | 9,35E-01 |
| <i>A_24_P401090</i>    | -1,03 | 8,35E-01 | 9,35E-01 |
| <i>AK024898</i>        | -1,01 | 8,35E-01 | 9,35E-01 |
| <i>C1QTNF3</i>         | 1,05  | 8,35E-01 | 9,35E-01 |
| <i>VPS41</i>           | -1,01 | 8,35E-01 | 9,35E-01 |
| <i>KDELR3</i>          | -1,03 | 8,35E-01 | 9,35E-01 |
| <i>THC2424610</i>      | -1,01 | 8,35E-01 | 9,35E-01 |
| <i>EPS8L3</i>          | -1,01 | 8,35E-01 | 9,35E-01 |
| <i>FLJ10404</i>        | -1,01 | 8,35E-01 | 9,35E-01 |
| <i>SEC14L2</i>         | 1,01  | 8,35E-01 | 9,35E-01 |
| <i>ENST00000378915</i> | -1,01 | 8,35E-01 | 9,35E-01 |
| <i>RARRES2</i>         | 1,02  | 8,35E-01 | 9,35E-01 |
| <i>CENPQ</i>           | 1,01  | 8,35E-01 | 9,35E-01 |
| <i>A_24_P911504</i>    | 1,01  | 8,35E-01 | 9,35E-01 |
| <i>ALPK3</i>           | -1,02 | 8,36E-01 | 9,35E-01 |
| <i>DKFZp667E0512</i>   | -1,01 | 8,36E-01 | 9,35E-01 |
| <i>SNX8</i>            | 1,01  | 8,36E-01 | 9,35E-01 |
| <i>FYTTD1</i>          | 1,01  | 8,36E-01 | 9,35E-01 |



|                        |       |          |          |
|------------------------|-------|----------|----------|
| <i>A_24_P878472</i>    | -1,01 | 8,36E-01 | 9,35E-01 |
| <i>BC018095</i>        | 1,01  | 8,36E-01 | 9,35E-01 |
| <i>A_24_P470754</i>    | 1,02  | 8,36E-01 | 9,35E-01 |
| <i>AK024490</i>        | -1,01 | 8,36E-01 | 9,35E-01 |
| <i>LFNG</i>            | 1,01  | 8,36E-01 | 9,35E-01 |
| <i>TMEM81</i>          | -1,01 | 8,36E-01 | 9,36E-01 |
| <i>AK095251</i>        | 1,01  | 8,36E-01 | 9,36E-01 |
| <i>TTY10</i>           | 1,01  | 8,36E-01 | 9,36E-01 |
| <i>A_24_P844470</i>    | 1,01  | 8,36E-01 | 9,36E-01 |
| <i>ARHGAP1</i>         | 1,01  | 8,36E-01 | 9,36E-01 |
| <i>WWP2</i>            | 1,08  | 8,36E-01 | 9,36E-01 |
| <i>THC2409757</i>      | -1,01 | 8,36E-01 | 9,36E-01 |
| <i>A_24_P58894</i>     | -1,02 | 8,36E-01 | 9,36E-01 |
| <i>C6orf113</i>        | -1,01 | 8,36E-01 | 9,36E-01 |
| <i>THC2374967</i>      | -1,01 | 8,36E-01 | 9,36E-01 |
| <i>CXCL5</i>           | 1,02  | 8,36E-01 | 9,36E-01 |
| <i>ADCY1</i>           | -1,03 | 8,37E-01 | 9,36E-01 |
| <i>RTN1</i>            | -1,02 | 8,37E-01 | 9,36E-01 |
| <i>ARHGEF5</i>         | -1,01 | 8,37E-01 | 9,36E-01 |
| <i>SERAC1</i>          | -1,01 | 8,37E-01 | 9,36E-01 |
| <i>A_24_P802894</i>    | -1,01 | 8,37E-01 | 9,36E-01 |
| <i>AY358233</i>        | -1,01 | 8,37E-01 | 9,36E-01 |
| <i>THC2376275</i>      | -1,01 | 8,37E-01 | 9,36E-01 |
| <i>MED19</i>           | -1,01 | 8,37E-01 | 9,36E-01 |
| <i>TLL6</i>            | -1,01 | 8,37E-01 | 9,36E-01 |
| <i>C6orf107</i>        | 1,01  | 8,37E-01 | 9,36E-01 |
| <i>CHD2</i>            | 1,01  | 8,37E-01 | 9,36E-01 |
| <i>ENST00000343319</i> | 1,01  | 8,37E-01 | 9,36E-01 |
| <i>ENST00000300469</i> | 1,01  | 8,37E-01 | 9,36E-01 |
| <i>THC2432677</i>      | 1,01  | 8,37E-01 | 9,36E-01 |
| <i>LOC284184</i>       | 1,01  | 8,37E-01 | 9,36E-01 |
| <i>PRB3</i>            | 1,01  | 8,37E-01 | 9,36E-01 |
| <i>NLGN1</i>           | 1,02  | 8,37E-01 | 9,36E-01 |
| <i>HIST1H3J</i>        | 1,03  | 8,37E-01 | 9,36E-01 |
| <i>SLC12A3</i>         | -1,01 | 8,37E-01 | 9,36E-01 |
| <i>A_24_P59239</i>     | -1,03 | 8,37E-01 | 9,36E-01 |
| <i>LOC414300</i>       | -1,01 | 8,37E-01 | 9,36E-01 |
| <i>THC2407956</i>      | 1,01  | 8,37E-01 | 9,36E-01 |
| <i>HYAL3</i>           | 1,01  | 8,37E-01 | 9,36E-01 |
| <i>BTBD1</i>           | 1,01  | 8,37E-01 | 9,36E-01 |
| <i>STRA13</i>          | 1,01  | 8,37E-01 | 9,36E-01 |
| <i>A_32_P119295</i>    | 1,01  | 8,37E-01 | 9,36E-01 |
| <i>ENST00000379131</i> | -1,01 | 8,38E-01 | 9,36E-01 |
| <i>AF150379</i>        | 1,01  | 8,38E-01 | 9,36E-01 |

|                        |       |          |          |
|------------------------|-------|----------|----------|
| <i>APOC2</i>           | -1,01 | 8,38E-01 | 9,36E-01 |
| <i>ADAMTS13</i>        | 1,01  | 8,38E-01 | 9,36E-01 |
| <i>BC089451</i>        | -1,01 | 8,38E-01 | 9,36E-01 |
| <i>ENST00000360524</i> | -1,03 | 8,38E-01 | 9,36E-01 |
| <i>ESX1</i>            | -1,02 | 8,38E-01 | 9,36E-01 |
| <i>CTAGE5</i>          | 1,01  | 8,38E-01 | 9,36E-01 |
| <i>RP3-398D13.1</i>    | 1,01  | 8,38E-01 | 9,36E-01 |
| <i>AK023394</i>        | 1,01  | 8,38E-01 | 9,36E-01 |
| <i>FXR1</i>            | 1,01  | 8,38E-01 | 9,36E-01 |
| <i>ELOVL2</i>          | -1,01 | 8,39E-01 | 9,37E-01 |
| <i>DIABLO</i>          | 1,01  | 8,39E-01 | 9,37E-01 |
| <i>GMFB</i>            | 1,01  | 8,39E-01 | 9,37E-01 |
| <i>LOC440288</i>       | 1,01  | 8,39E-01 | 9,37E-01 |
| <i>NHLH1</i>           | 1,01  | 8,39E-01 | 9,37E-01 |
| <i>A_24_P938263</i>    | 1,01  | 8,39E-01 | 9,37E-01 |
| <i>BE710618</i>        | 1,01  | 8,39E-01 | 9,37E-01 |
| <i>FLJ16237</i>        | 1,01  | 8,39E-01 | 9,37E-01 |
| <i>AA991488</i>        | -1,01 | 8,39E-01 | 9,37E-01 |
| <i>LTA</i>             | 1,01  | 8,39E-01 | 9,37E-01 |
| <i>NEUROD6</i>         | -1,01 | 8,39E-01 | 9,37E-01 |
| <i>TRIM60</i>          | 1,01  | 8,39E-01 | 9,37E-01 |
| <i>DLEU8</i>           | 1,01  | 8,39E-01 | 9,37E-01 |
| <i>MLSTD2</i>          | 1,01  | 8,39E-01 | 9,37E-01 |
| <i>BF955364</i>        | -1,02 | 8,39E-01 | 9,37E-01 |
| <i>A_24_P40995</i>     | -1,01 | 8,40E-01 | 9,37E-01 |
| <i>ATP6V1F</i>         | -1,01 | 8,40E-01 | 9,37E-01 |
| <i>ENST00000264313</i> | -1,01 | 8,40E-01 | 9,37E-01 |
| <i>MMD2</i>            | -1,01 | 8,40E-01 | 9,37E-01 |
| <i>SNX9</i>            | -1,01 | 8,40E-01 | 9,37E-01 |
| <i>A_24_P745352</i>    | -1,01 | 8,40E-01 | 9,37E-01 |
| <i>A_24_P901836</i>    | -1,01 | 8,40E-01 | 9,37E-01 |
| <i>ENST00000369990</i> | 1,01  | 8,39E-01 | 9,37E-01 |
| <i>THC2359721</i>      | 1,01  | 8,40E-01 | 9,37E-01 |
| <i>A_24_P936628</i>    | 1,01  | 8,40E-01 | 9,37E-01 |
| <i>THC2317680</i>      | 1,01  | 8,40E-01 | 9,37E-01 |
| <i>CCKBR</i>           | 1,01  | 8,39E-01 | 9,37E-01 |
| <i>CACNA1H</i>         | 1,02  | 8,39E-01 | 9,37E-01 |
| <i>A_32_P63113</i>     | -1,02 | 8,40E-01 | 9,37E-01 |
| <i>BC042080</i>        | -1,01 | 8,40E-01 | 9,37E-01 |
| <i>C3orf46</i>         | -1,01 | 8,40E-01 | 9,37E-01 |
| <i>ZBTB17</i>          | -1,01 | 8,40E-01 | 9,37E-01 |
| <i>C14orf143</i>       | 1,01  | 8,40E-01 | 9,37E-01 |
| <i>PITPNM3</i>         | 1,01  | 8,40E-01 | 9,37E-01 |
| <i>A_32_P147830</i>    | -1,02 | 8,40E-01 | 9,37E-01 |

|                        |       |          |          |
|------------------------|-------|----------|----------|
| <i>MTRR</i>            | -1,01 | 8,40E-01 | 9,37E-01 |
| <i>ENST00000354861</i> | -1,01 | 8,40E-01 | 9,37E-01 |
| <i>THC2384968</i>      | 1,01  | 8,40E-01 | 9,37E-01 |
| <i>AY143171</i>        | -1,02 | 8,40E-01 | 9,37E-01 |
| <i>SEMA4C</i>          | -1,01 | 8,40E-01 | 9,37E-01 |
| <i>THC2443137</i>      | -1,01 | 8,41E-01 | 9,38E-01 |
| <i>MAPK12</i>          | -1,01 | 8,41E-01 | 9,38E-01 |
| <i>STMN4</i>           | -1,01 | 8,41E-01 | 9,38E-01 |
| <i>PRPF19</i>          | -1,01 | 8,41E-01 | 9,38E-01 |
| <i>POR</i>             | 1,01  | 8,41E-01 | 9,38E-01 |
| <i>MAB21L2</i>         | 1,04  | 8,41E-01 | 9,38E-01 |
| <i>UNQ338</i>          | -1,03 | 8,41E-01 | 9,38E-01 |
| <i>HEXB</i>            | -1,01 | 8,41E-01 | 9,38E-01 |
| <i>THC2275252</i>      | 1,03  | 8,41E-01 | 9,38E-01 |
| <i>ENST00000376802</i> | -1,02 | 8,41E-01 | 9,38E-01 |
| <i>BSND</i>            | -1,01 | 8,41E-01 | 9,38E-01 |
| <i>SLC25A31</i>        | -1,01 | 8,41E-01 | 9,38E-01 |
| <i>TAS2R9</i>          | -1,01 | 8,41E-01 | 9,38E-01 |
| <i>A_24_P212605</i>    | -1,01 | 8,41E-01 | 9,38E-01 |
| <i>A_24_P682601</i>    | -1,01 | 8,41E-01 | 9,38E-01 |
| <i>PSMD7</i>           | 1,01  | 8,41E-01 | 9,38E-01 |
| <i>LILRA2</i>          | 1,01  | 8,41E-01 | 9,38E-01 |
| <i>TMEM92</i>          | 1,01  | 8,41E-01 | 9,38E-01 |
| <i>A_24_P281683</i>    | 1,02  | 8,41E-01 | 9,38E-01 |
| <i>TBC1D19</i>         | -1,01 | 8,41E-01 | 9,38E-01 |
| <i>LIX1L</i>           | -1,01 | 8,41E-01 | 9,38E-01 |
| <i>BC011660</i>        | -1,01 | 8,41E-01 | 9,38E-01 |
| <i>CD242823</i>        | -1,01 | 8,41E-01 | 9,38E-01 |
| <i>NUP155</i>          | -1,01 | 8,41E-01 | 9,38E-01 |
| <i>DYX1C1</i>          | -1,01 | 8,42E-01 | 9,38E-01 |
| <i>AK057719</i>        | -1,01 | 8,42E-01 | 9,38E-01 |
| <i>A_24_P816073</i>    | 1,01  | 8,42E-01 | 9,38E-01 |
| <i>AI743753</i>        | 1,01  | 8,42E-01 | 9,38E-01 |
| <i>SPATA8</i>          | 1,01  | 8,42E-01 | 9,38E-01 |
| <i>VKORC1L1</i>        | 1,01  | 8,42E-01 | 9,38E-01 |
| <i>FGFR3</i>           | 1,03  | 8,42E-01 | 9,38E-01 |
| <i>ENST00000327469</i> | -1,01 | 8,42E-01 | 9,38E-01 |
| <i>RDH12</i>           | 1,05  | 8,42E-01 | 9,38E-01 |
| <i>AK074481</i>        | -1,01 | 8,42E-01 | 9,38E-01 |
| <i>RNASEH2A</i>        | 1,01  | 8,42E-01 | 9,38E-01 |
| <i>A_24_P636834</i>    | 1,01  | 8,42E-01 | 9,38E-01 |
| <i>SLC43A1</i>         | 1,01  | 8,42E-01 | 9,38E-01 |
| <i>BC063881</i>        | -1,01 | 8,42E-01 | 9,38E-01 |
| <i>AT_D_5</i>          | -1,01 | 8,42E-01 | 9,38E-01 |

|                        |       |          |          |
|------------------------|-------|----------|----------|
| <i>ANXA8</i>           | 1,07  | 8,42E-01 | 9,38E-01 |
| <i>KLP1</i>            | -1,01 | 8,42E-01 | 9,38E-01 |
| <i>A_24_P743424</i>    | -1,01 | 8,42E-01 | 9,38E-01 |
| <i>FAM120C</i>         | -1,01 | 8,42E-01 | 9,38E-01 |
| <i>ENST00000283963</i> | -1,01 | 8,42E-01 | 9,38E-01 |
| <i>THC2412604</i>      | 1,01  | 8,42E-01 | 9,38E-01 |
| <i>AF130093</i>        | -1,01 | 8,42E-01 | 9,38E-01 |
| <i>IL31</i>            | -1,01 | 8,42E-01 | 9,38E-01 |
| <i>AI638367</i>        | 1,01  | 8,42E-01 | 9,38E-01 |
| <i>CNDP2</i>           | -1,01 | 8,43E-01 | 9,38E-01 |
| <i>C14orf128</i>       | -1,01 | 8,43E-01 | 9,38E-01 |
| <i>THC2417920</i>      | 1,01  | 8,43E-01 | 9,38E-01 |
| <i>THC2322562</i>      | 1,01  | 8,43E-01 | 9,38E-01 |
| <i>ICA1L</i>           | -1,01 | 8,43E-01 | 9,38E-01 |
| <i>HNRPDL</i>          | 1,01  | 8,43E-01 | 9,38E-01 |
| <i>THC2342964</i>      | 1,01  | 8,43E-01 | 9,38E-01 |
| <i>MYOM2</i>           | 1,02  | 8,43E-01 | 9,38E-01 |
| <i>CA427043</i>        | -1,01 | 8,43E-01 | 9,38E-01 |
| <i>C1orf41</i>         | -1,01 | 8,43E-01 | 9,38E-01 |
| <i>CAPN2</i>           | 1,01  | 8,43E-01 | 9,39E-01 |
| <i>FLJ45803</i>        | -1,01 | 8,43E-01 | 9,39E-01 |
| <i>A_24_P272910</i>    | 1,01  | 8,43E-01 | 9,39E-01 |
| <i>ENST00000370419</i> | 1,01  | 8,43E-01 | 9,39E-01 |
| <i>FAM21C</i>          | 1,01  | 8,43E-01 | 9,39E-01 |
| <i>A_24_P289854</i>    | 1,01  | 8,43E-01 | 9,39E-01 |
| <i>PIWIL1</i>          | 1,01  | 8,44E-01 | 9,39E-01 |
| <i>ENST00000332863</i> | 1,01  | 8,43E-01 | 9,39E-01 |
| <i>REG3G</i>           | 1,01  | 8,43E-01 | 9,39E-01 |
| <i>MBNL2</i>           | 1,01  | 8,43E-01 | 9,39E-01 |
| <i>STXBP5L</i>         | 1,03  | 8,43E-01 | 9,39E-01 |
| <i>ENST00000380749</i> | -1,01 | 8,44E-01 | 9,39E-01 |
| <i>AB073660</i>        | -1,01 | 8,44E-01 | 9,39E-01 |
| <i>DB097529</i>        | 1,01  | 8,44E-01 | 9,39E-01 |
| <i>BC022398</i>        | -1,02 | 8,44E-01 | 9,39E-01 |
| <i>AL110257</i>        | 1,01  | 8,44E-01 | 9,39E-01 |
| <i>VN1R5</i>           | -1,01 | 8,44E-01 | 9,39E-01 |
| <i>AK094853</i>        | -1,01 | 8,44E-01 | 9,39E-01 |
| <i>C1orf24</i>         | 1,02  | 8,44E-01 | 9,39E-01 |
| <i>TAF6L</i>           | 1,01  | 8,44E-01 | 9,39E-01 |
| <i>CLPB</i>            | 1,01  | 8,44E-01 | 9,39E-01 |
| <i>C13orf16</i>        | -1,01 | 8,44E-01 | 9,39E-01 |
| <i>CK904801</i>        | 1,01  | 8,44E-01 | 9,39E-01 |
| <i>A_24_P255763</i>    | -1,03 | 8,44E-01 | 9,39E-01 |
| <i>AK021980</i>        | -1,01 | 8,44E-01 | 9,39E-01 |

|                        |       |          |          |
|------------------------|-------|----------|----------|
| <i>BC009051</i>        | -1,01 | 8,44E-01 | 9,39E-01 |
| <i>E4F1</i>            | -1,01 | 8,44E-01 | 9,39E-01 |
| <i>ATP6V1B2</i>        | 1,01  | 8,44E-01 | 9,39E-01 |
| <i>PDCL2</i>           | 1,01  | 8,44E-01 | 9,39E-01 |
| <i>A_23_P89506</i>     | 1,01  | 8,44E-01 | 9,39E-01 |
| <i>ENST00000176186</i> | 1,01  | 8,44E-01 | 9,39E-01 |
| <i>DHCR7</i>           | -1,02 | 8,44E-01 | 9,39E-01 |
| <i>CNOT6L</i>          | 1,01  | 8,45E-01 | 9,39E-01 |
| <i>NBPF11</i>          | -1,01 | 8,45E-01 | 9,39E-01 |
| <i>THC2279153</i>      | -1,01 | 8,45E-01 | 9,39E-01 |
| <i>AK054965</i>        | -1,01 | 8,45E-01 | 9,39E-01 |
| <i>LRRC42</i>          | -1,01 | 8,45E-01 | 9,39E-01 |
| <i>A_32_P43178</i>     | 1,01  | 8,45E-01 | 9,39E-01 |
| <i>BC029043</i>        | 1,01  | 8,45E-01 | 9,39E-01 |
| <i>A_24_P633527</i>    | 1,01  | 8,45E-01 | 9,39E-01 |
| <i>DDX4</i>            | 1,01  | 8,45E-01 | 9,39E-01 |
| <i>GLT1D1</i>          | 1,02  | 8,45E-01 | 9,39E-01 |
| <i>BF959143</i>        | 1,01  | 8,45E-01 | 9,39E-01 |
| <i>ENST00000302511</i> | 1,01  | 8,45E-01 | 9,39E-01 |
| <i>RAFTLIN</i>         | 1,02  | 8,45E-01 | 9,39E-01 |
| <i>NP101106</i>        | -1,02 | 8,45E-01 | 9,39E-01 |
| <i>ENST00000341689</i> | 1,01  | 8,45E-01 | 9,39E-01 |
| <i>MRPL30</i>          | -1,01 | 8,45E-01 | 9,39E-01 |
| <i>CF139200</i>        | -1,01 | 8,45E-01 | 9,39E-01 |
| <i>THC2414364</i>      | -1,01 | 8,45E-01 | 9,39E-01 |
| <i>ENST00000334514</i> | 1,01  | 8,45E-01 | 9,39E-01 |
| <i>SLCO1B3</i>         | 1,01  | 8,45E-01 | 9,39E-01 |
| <i>TREML2</i>          | 1,01  | 8,45E-01 | 9,39E-01 |
| <i>LOC392506</i>       | 1,02  | 8,45E-01 | 9,39E-01 |
| <i>KIAA0672</i>        | -1,02 | 8,46E-01 | 9,39E-01 |
| <i>IL17RA</i>          | -1,01 | 8,45E-01 | 9,39E-01 |
| <i>POLR2K</i>          | -1,01 | 8,46E-01 | 9,39E-01 |
| <i>A_32_P110780</i>    | 1,01  | 8,46E-01 | 9,39E-01 |
| <i>ENST00000269200</i> | -1,02 | 8,46E-01 | 9,39E-01 |
| <i>NSD1</i>            | -1,01 | 8,46E-01 | 9,39E-01 |
| <i>IRS2</i>            | -1,02 | 8,46E-01 | 9,39E-01 |
| <i>A_24_P212764</i>    | -1,01 | 8,46E-01 | 9,39E-01 |
| <i>ERCC1</i>           | -1,01 | 8,46E-01 | 9,39E-01 |
| <i>A_24_P25020</i>     | -1,01 | 8,46E-01 | 9,39E-01 |
| <i>ENST00000328794</i> | -1,01 | 8,46E-01 | 9,39E-01 |
| <i>KIAA1244</i>        | 1,01  | 8,46E-01 | 9,39E-01 |
| <i>SERPINA10</i>       | 1,01  | 8,46E-01 | 9,39E-01 |
| <i>BRI3</i>            | 1,01  | 8,46E-01 | 9,39E-01 |
| <i>THC2439234</i>      | -1,01 | 8,46E-01 | 9,39E-01 |

|                        |       |          |          |
|------------------------|-------|----------|----------|
| <i>CWF19L1</i>         | -1,01 | 8,46E-01 | 9,39E-01 |
| <i>ENST00000297317</i> | 1,01  | 8,46E-01 | 9,39E-01 |
| <i>THC2317587</i>      | -1,02 | 8,46E-01 | 9,39E-01 |
| <i>GPX6</i>            | -1,01 | 8,46E-01 | 9,39E-01 |
| <i>MBD6</i>            | -1,01 | 8,46E-01 | 9,39E-01 |
| <i>C4orf8</i>          | 1,01  | 8,46E-01 | 9,39E-01 |
| <i>UPP2</i>            | 1,01  | 8,46E-01 | 9,39E-01 |
| <i>AA554330</i>        | 1,01  | 8,46E-01 | 9,39E-01 |
| <i>AY007156</i>        | -1,01 | 8,46E-01 | 9,39E-01 |
| <i>C3orf19</i>         | -1,01 | 8,46E-01 | 9,39E-01 |
| <i>LIN28</i>           | -1,01 | 8,46E-01 | 9,40E-01 |
| <i>HERC2</i>           | 1,01  | 8,46E-01 | 9,40E-01 |
| <i>GBAS</i>            | -1,01 | 8,47E-01 | 9,40E-01 |
| <i>A_24_P144275</i>    | -1,01 | 8,47E-01 | 9,40E-01 |
| <i>A_23_P37966</i>     | -1,01 | 8,47E-01 | 9,40E-01 |
| <i>THC2374792</i>      | -1,01 | 8,47E-01 | 9,40E-01 |
| <i>KIAA1659</i>        | 1,01  | 8,47E-01 | 9,40E-01 |
| <i>ENST00000346165</i> | -1,01 | 8,47E-01 | 9,40E-01 |
| <i>FLJ13310</i>        | 1,01  | 8,47E-01 | 9,40E-01 |
| <i>A_24_P92744</i>     | -1,02 | 8,47E-01 | 9,40E-01 |
| <i>ENST00000270720</i> | -1,01 | 8,47E-01 | 9,40E-01 |
| <i>BTBD6</i>           | -1,01 | 8,47E-01 | 9,40E-01 |
| <i>BQ380238</i>        | -1,01 | 8,47E-01 | 9,40E-01 |
| <i>APOL2</i>           | -1,01 | 8,47E-01 | 9,40E-01 |
| <i>CHST5</i>           | -1,01 | 8,47E-01 | 9,40E-01 |
| <i>SNRPB2</i>          | -1,01 | 8,47E-01 | 9,40E-01 |
| <i>COX11</i>           | 1,01  | 8,47E-01 | 9,40E-01 |
| <i>HFE2</i>            | -1,01 | 8,47E-01 | 9,40E-01 |
| <i>THC2391331</i>      | -1,01 | 8,48E-01 | 9,40E-01 |
| <i>ARF1</i>            | 1,01  | 8,48E-01 | 9,40E-01 |
| <i>ENST00000328398</i> | 1,01  | 8,48E-01 | 9,40E-01 |
| <i>CPNE3</i>           | 1,01  | 8,48E-01 | 9,40E-01 |
| <i>C8orf68</i>         | 1,02  | 8,48E-01 | 9,40E-01 |
| <i>VAX2</i>            | -1,01 | 8,48E-01 | 9,40E-01 |
| <i>THC2265991</i>      | 1,01  | 8,48E-01 | 9,40E-01 |
| <i>A_24_P409772</i>    | 1,01  | 8,48E-01 | 9,40E-01 |
| <i>A_24_P714750</i>    | 1,01  | 8,48E-01 | 9,40E-01 |
| <i>MIB2</i>            | 1,01  | 8,48E-01 | 9,40E-01 |
| <i>BNC1</i>            | 1,01  | 8,48E-01 | 9,40E-01 |
| <i>THC2298022</i>      | 1,01  | 8,48E-01 | 9,40E-01 |
| <i>DOCK4</i>           | -1,01 | 8,48E-01 | 9,40E-01 |
| <i>CD618601</i>        | 1,01  | 8,48E-01 | 9,40E-01 |
| <i>UROC1</i>           | 1,01  | 8,48E-01 | 9,41E-01 |
| <i>BU625797</i>        | 1,01  | 8,48E-01 | 9,41E-01 |

|                        |       |          |          |
|------------------------|-------|----------|----------|
| <i>CD521096</i>        | -1,03 | 8,48E-01 | 9,41E-01 |
| <i>TMEM121</i>         | -1,01 | 8,48E-01 | 9,41E-01 |
| <i>DKFZp434J1015</i>   | 1,01  | 8,49E-01 | 9,41E-01 |
| <i>LOC554250</i>       | -1,01 | 8,49E-01 | 9,41E-01 |
| <i>ENST00000378679</i> | -1,01 | 8,49E-01 | 9,41E-01 |
| <i>APXL2</i>           | -1,01 | 8,49E-01 | 9,41E-01 |
| <i>A_24_P940209</i>    | -1,01 | 8,49E-01 | 9,41E-01 |
| <i>DSCR4</i>           | -1,00 | 8,49E-01 | 9,41E-01 |
| <i>THC2425545</i>      | 1,01  | 8,49E-01 | 9,41E-01 |
| <i>A_23_P134704</i>    | 1,01  | 8,49E-01 | 9,41E-01 |
| <i>NOTCH4</i>          | 1,01  | 8,49E-01 | 9,41E-01 |
| <i>NCF2</i>            | 1,02  | 8,49E-01 | 9,41E-01 |
| <i>A_32_P83411</i>     | 1,01  | 8,49E-01 | 9,41E-01 |
| <i>ENST00000282964</i> | -1,01 | 8,49E-01 | 9,41E-01 |
| <i>ULBP2</i>           | 1,02  | 8,49E-01 | 9,41E-01 |
| <i>APEH</i>            | 1,01  | 8,49E-01 | 9,41E-01 |
| <i>RRBP1</i>           | -1,01 | 8,49E-01 | 9,41E-01 |
| <i>A_23_P72014</i>     | -1,01 | 8,49E-01 | 9,41E-01 |
| <i>A_24_P748738</i>    | -1,01 | 8,49E-01 | 9,41E-01 |
| <i>FSHR</i>            | 1,01  | 8,49E-01 | 9,41E-01 |
| <i>A_24_P910971</i>    | 1,01  | 8,49E-01 | 9,41E-01 |
| <i>MGC52057</i>        | 1,01  | 8,49E-01 | 9,41E-01 |
| <i>AK023631</i>        | -1,02 | 8,50E-01 | 9,41E-01 |
| <i>PCDHB16</i>         | -1,01 | 8,50E-01 | 9,41E-01 |
| <i>ATP5A1</i>          | 1,01  | 8,50E-01 | 9,41E-01 |
| <i>VIT</i>             | -1,03 | 8,50E-01 | 9,41E-01 |
| <i>AL137354</i>        | -1,01 | 8,50E-01 | 9,41E-01 |
| <i>BC010126</i>        | -1,01 | 8,50E-01 | 9,41E-01 |
| <i>THC2442152</i>      | -1,01 | 8,50E-01 | 9,41E-01 |
| <i>MAP3K7</i>          | -1,01 | 8,50E-01 | 9,41E-01 |
| <i>BG620191</i>        | 1,01  | 8,50E-01 | 9,41E-01 |
| <i>C20orf117</i>       | -1,01 | 8,50E-01 | 9,41E-01 |
| <i>PSORS1C1</i>        | -1,02 | 8,50E-01 | 9,41E-01 |
| <i>A_24_P476102</i>    | -1,02 | 8,50E-01 | 9,41E-01 |
| <i>A_24_P230116</i>    | -1,01 | 8,50E-01 | 9,41E-01 |
| <i>BX379032</i>        | -1,01 | 8,50E-01 | 9,41E-01 |
| <i>AI766403</i>        | -1,01 | 8,50E-01 | 9,41E-01 |
| <i>A_32_P146871</i>    | -1,01 | 8,50E-01 | 9,41E-01 |
| <i>SFRS9</i>           | -1,01 | 8,50E-01 | 9,41E-01 |
| <i>A_24_P127042</i>    | 1,02  | 8,50E-01 | 9,41E-01 |
| <i>SAA4</i>            | 1,00  | 8,50E-01 | 9,41E-01 |
| <i>CCR1</i>            | -1,01 | 8,51E-01 | 9,41E-01 |
| <i>HIST1H4G</i>        | -1,01 | 8,51E-01 | 9,41E-01 |
| <i>KCNK3</i>           | -1,02 | 8,51E-01 | 9,41E-01 |

|                     |       |          |          |
|---------------------|-------|----------|----------|
| <i>AK023050</i>     | 1,02  | 8,51E-01 | 9,41E-01 |
| <i>ENPP2</i>        | -1,03 | 8,51E-01 | 9,42E-01 |
| <i>TPST1</i>        | 1,01  | 8,51E-01 | 9,42E-01 |
| <i>TAS2R4</i>       | 1,01  | 8,51E-01 | 9,42E-01 |
| <i>THC2361211</i>   | -1,01 | 8,51E-01 | 9,42E-01 |
| <i>AF161361</i>     | -1,01 | 8,51E-01 | 9,42E-01 |
| <i>TNFSF15</i>      | 1,00  | 8,51E-01 | 9,42E-01 |
| <i>A_24_P930482</i> | 1,01  | 8,51E-01 | 9,42E-01 |
| <i>PLA2G2A</i>      | 1,03  | 8,51E-01 | 9,42E-01 |
| <i>C14orf151</i>    | 1,01  | 8,51E-01 | 9,42E-01 |
| <i>BE173410</i>     | -1,01 | 8,51E-01 | 9,42E-01 |
| <i>A_32_P44987</i>  | -1,01 | 8,51E-01 | 9,42E-01 |
| <i>A_32_P127658</i> | 1,01  | 8,51E-01 | 9,42E-01 |
| <i>PQLC2</i>        | 1,01  | 8,51E-01 | 9,42E-01 |
| <i>LOC389833</i>    | -1,01 | 8,51E-01 | 9,42E-01 |
| <i>ZMAT1</i>        | 1,01  | 8,51E-01 | 9,42E-01 |
| <i>AK092421</i>     | 1,02  | 8,51E-01 | 9,42E-01 |
| <i>USP54</i>        | -1,01 | 8,52E-01 | 9,42E-01 |
| <i>C3orf38</i>      | 1,01  | 8,52E-01 | 9,42E-01 |
| <i>A_24_P676999</i> | 1,01  | 8,52E-01 | 9,42E-01 |
| <i>BC042986</i>     | 1,01  | 8,52E-01 | 9,42E-01 |
| <i>A_24_P298894</i> | 1,07  | 8,52E-01 | 9,42E-01 |
| <i>NROB1</i>        | 1,09  | 8,52E-01 | 9,42E-01 |
| <i>GPR177</i>       | -1,01 | 8,52E-01 | 9,42E-01 |
| <i>BG009631</i>     | -1,01 | 8,52E-01 | 9,42E-01 |
| <i>BG618056</i>     | 1,01  | 8,52E-01 | 9,42E-01 |
| <i>RAD9B</i>        | -1,02 | 8,52E-01 | 9,42E-01 |
| <i>A_32_P157002</i> | 1,01  | 8,52E-01 | 9,42E-01 |
| <i>BC053854</i>     | -1,01 | 8,52E-01 | 9,42E-01 |
| <i>AK090950</i>     | -1,01 | 8,52E-01 | 9,42E-01 |
| <i>C6orf54</i>      | 1,01  | 8,52E-01 | 9,42E-01 |
| <i>AI652920</i>     | -1,01 | 8,52E-01 | 9,42E-01 |
| <i>C22orf31</i>     | -1,01 | 8,52E-01 | 9,42E-01 |
| <i>LOC285398</i>    | -1,01 | 8,52E-01 | 9,42E-01 |
| <i>ZNF746</i>       | 1,01  | 8,52E-01 | 9,42E-01 |
| <i>A_24_P799646</i> | 1,01  | 8,52E-01 | 9,42E-01 |
| <i>CCDC55</i>       | 1,01  | 8,52E-01 | 9,42E-01 |
| <i>MYH6</i>         | 1,00  | 8,53E-01 | 9,42E-01 |
| <i>DDX54</i>        | 1,01  | 8,53E-01 | 9,42E-01 |
| <i>SAFB2</i>        | 1,01  | 8,53E-01 | 9,42E-01 |
| <i>SCN3A</i>        | 1,02  | 8,53E-01 | 9,42E-01 |
| <i>CAMK2N1</i>      | -1,01 | 8,53E-01 | 9,42E-01 |
| <i>ZNF679</i>       | -1,01 | 8,53E-01 | 9,42E-01 |
| <i>FSIP1</i>        | -1,01 | 8,53E-01 | 9,42E-01 |



|                        |       |          |          |
|------------------------|-------|----------|----------|
| <i>ENST00000369046</i> | -1,01 | 8,53E-01 | 9,42E-01 |
| <i>AK125452</i>        | 1,03  | 8,53E-01 | 9,42E-01 |
| <i>FLJ20273</i>        | -1,06 | 8,53E-01 | 9,43E-01 |
| <i>ENST00000224809</i> | -1,02 | 8,53E-01 | 9,43E-01 |
| <i>CCDC23</i>          | -1,01 | 8,53E-01 | 9,43E-01 |
| <i>RALGPS1</i>         | -1,01 | 8,53E-01 | 9,43E-01 |
| <i>A_24_P290257</i>    | -1,01 | 8,53E-01 | 9,43E-01 |
| <i>THC2405087</i>      | 1,01  | 8,53E-01 | 9,43E-01 |
| <i>C8orf51</i>         | 1,01  | 8,53E-01 | 9,43E-01 |
| <i>CLDN2</i>           | 1,01  | 8,53E-01 | 9,43E-01 |
| <i>A_24_P109614</i>    | 1,01  | 8,53E-01 | 9,43E-01 |
| <i>RBP7</i>            | 1,02  | 8,53E-01 | 9,43E-01 |
| <i>THC2354672</i>      | 1,02  | 8,53E-01 | 9,43E-01 |
| <i>PITPNC1</i>         | -1,01 | 8,53E-01 | 9,43E-01 |
| <i>TTC22</i>           | -1,01 | 8,53E-01 | 9,43E-01 |
| <i>GEFT</i>            | -1,02 | 8,53E-01 | 9,43E-01 |
| <i>UCP1</i>            | -1,01 | 8,54E-01 | 9,43E-01 |
| <i>GNG11</i>           | -1,01 | 8,54E-01 | 9,43E-01 |
| <i>AK094972</i>        | -1,01 | 8,54E-01 | 9,43E-01 |
| <i>SPATA19</i>         | -1,01 | 8,54E-01 | 9,43E-01 |
| <i>AF143331</i>        | -1,01 | 8,54E-01 | 9,43E-01 |
| <i>A_32_P145302</i>    | -1,01 | 8,54E-01 | 9,43E-01 |
| <i>ZNF570</i>          | -1,01 | 8,54E-01 | 9,43E-01 |
| <i>AJ315134</i>        | 1,01  | 8,54E-01 | 9,43E-01 |
| <i>PRIM2A</i>          | 1,01  | 8,54E-01 | 9,43E-01 |
| <i>ADIPOR1</i>         | 1,01  | 8,54E-01 | 9,43E-01 |
| <i>KRT32</i>           | 1,01  | 8,54E-01 | 9,43E-01 |
| <i>CYB5R1</i>          | -1,01 | 8,54E-01 | 9,43E-01 |
| <i>A_32_P73717</i>     | 1,02  | 8,54E-01 | 9,43E-01 |
| <i>AK127768</i>        | -1,01 | 8,54E-01 | 9,43E-01 |
| <i>A_32_P760762</i>    | -1,01 | 8,54E-01 | 9,43E-01 |
| <i>DCBLD2</i>          | 1,01  | 8,54E-01 | 9,43E-01 |
| <i>CN478720</i>        | 1,01  | 8,54E-01 | 9,43E-01 |
| <i>ANXA6</i>           | 1,01  | 8,54E-01 | 9,43E-01 |
| <i>TBX4</i>            | -1,01 | 8,54E-01 | 9,43E-01 |
| <i>C20orf133</i>       | -1,02 | 8,54E-01 | 9,43E-01 |
| <i>CR745430</i>        | -1,01 | 8,54E-01 | 9,43E-01 |
| <i>CDCP1</i>           | -1,01 | 8,55E-01 | 9,43E-01 |
| <i>POLRMT</i>          | -1,01 | 8,55E-01 | 9,43E-01 |
| <i>DAND5</i>           | -1,01 | 8,55E-01 | 9,43E-01 |
| <i>PCDHB18</i>         | -1,01 | 8,55E-01 | 9,43E-01 |
| <i>RPS6KL1</i>         | 1,01  | 8,55E-01 | 9,43E-01 |
| <i>ZNF148</i>          | 1,01  | 8,55E-01 | 9,43E-01 |
| <i>THC2291117</i>      | 1,01  | 8,55E-01 | 9,43E-01 |

|                        |       |          |          |
|------------------------|-------|----------|----------|
| <i>UNKL</i>            | 1,01  | 8,55E-01 | 9,43E-01 |
| <i>PPP1R3D</i>         | 1,01  | 8,55E-01 | 9,43E-01 |
| <i>A_24_P186664</i>    | 1,01  | 8,55E-01 | 9,43E-01 |
| <i>LGR5</i>            | 1,05  | 8,55E-01 | 9,43E-01 |
| <i>LOC647215</i>       | -1,01 | 8,55E-01 | 9,43E-01 |
| <i>ASXL2</i>           | 1,01  | 8,55E-01 | 9,43E-01 |
| <i>A_32_P74778</i>     | 1,01  | 8,55E-01 | 9,43E-01 |
| <i>TMC2</i>            | -1,01 | 8,55E-01 | 9,43E-01 |
| <i>MGC2664</i>         | 1,01  | 8,55E-01 | 9,43E-01 |
| <i>AW076051</i>        | 1,01  | 8,55E-01 | 9,43E-01 |
| <i>DYNC1H1</i>         | 1,01  | 8,55E-01 | 9,43E-01 |
| <i>BC073935</i>        | 1,02  | 8,55E-01 | 9,43E-01 |
| <i>A_24_P24786</i>     | -1,03 | 8,55E-01 | 9,43E-01 |
| <i>PPOX</i>            | -1,01 | 8,55E-01 | 9,43E-01 |
| <i>AMHR2</i>           | 1,01  | 8,55E-01 | 9,43E-01 |
| <i>SPRR3</i>           | -1,12 | 8,56E-01 | 9,43E-01 |
| <i>A_24_P332471</i>    | -1,01 | 8,56E-01 | 9,43E-01 |
| <i>UBE2G1</i>          | -1,01 | 8,56E-01 | 9,43E-01 |
| <i>T87820</i>          | -1,01 | 8,56E-01 | 9,43E-01 |
| <i>TK2</i>             | -1,00 | 8,56E-01 | 9,43E-01 |
| <i>ENST00000325122</i> | 1,01  | 8,56E-01 | 9,43E-01 |
| <i>NPSR1</i>           | 1,01  | 8,56E-01 | 9,43E-01 |
| <i>IGHD</i>            | 1,01  | 8,56E-01 | 9,43E-01 |
| <i>AK057319</i>        | 1,01  | 8,56E-01 | 9,43E-01 |
| <i>THC2290243</i>      | 1,01  | 8,56E-01 | 9,43E-01 |
| <i>ST3GAL1</i>         | 1,01  | 8,56E-01 | 9,43E-01 |
| <i>A_23_P165819</i>    | 1,01  | 8,56E-01 | 9,43E-01 |
| <i>UBXD5</i>           | -1,01 | 8,56E-01 | 9,43E-01 |
| <i>A_24_P790424</i>    | -1,01 | 8,56E-01 | 9,43E-01 |
| <i>MGAT1</i>           | 1,01  | 8,56E-01 | 9,44E-01 |
| <i>POLR3GL</i>         | 1,01  | 8,56E-01 | 9,44E-01 |
| <i>SUZ12</i>           | 1,00  | 8,56E-01 | 9,44E-01 |
| <i>ENST00000299826</i> | 1,01  | 8,56E-01 | 9,44E-01 |
| <i>NXN</i>             | 1,01  | 8,56E-01 | 9,44E-01 |
| <i>NUDT16</i>          | 1,01  | 8,56E-01 | 9,44E-01 |
| <i>A_24_P941977</i>    | 1,01  | 8,56E-01 | 9,44E-01 |
| <i>NEB</i>             | 1,02  | 8,56E-01 | 9,44E-01 |
| <i>DHCR24</i>          | 1,03  | 8,56E-01 | 9,44E-01 |
| <i>SFRP5</i>           | -1,01 | 8,57E-01 | 9,44E-01 |
| <i>BMP7</i>            | -1,02 | 8,57E-01 | 9,44E-01 |
| <i>CTTNBP2</i>         | -1,01 | 8,57E-01 | 9,44E-01 |
| <i>C7orf11</i>         | 1,01  | 8,57E-01 | 9,44E-01 |
| <i>THC2340193</i>      | 1,01  | 8,57E-01 | 9,44E-01 |
| <i>AK025474</i>        | 1,01  | 8,57E-01 | 9,44E-01 |

|                 |       |          |          |
|-----------------|-------|----------|----------|
| VPS33B          | 1,01  | 8,57E-01 | 9,44E-01 |
| GPS1            | 1,01  | 8,57E-01 | 9,44E-01 |
| JPH2            | 1,03  | 8,57E-01 | 9,44E-01 |
| ENST00000298047 | 1,03  | 8,57E-01 | 9,44E-01 |
| THC2419501      | -1,03 | 8,57E-01 | 9,44E-01 |
| C9orf46         | -1,01 | 8,57E-01 | 9,44E-01 |
| AK000205        | 1,01  | 8,57E-01 | 9,44E-01 |
| AF116601        | -1,01 | 8,57E-01 | 9,44E-01 |
| AL834342        | -1,01 | 8,57E-01 | 9,44E-01 |
| BQ329909        | -1,02 | 8,57E-01 | 9,44E-01 |
| AW385956        | -1,01 | 8,57E-01 | 9,44E-01 |
| PSKH2           | -1,01 | 8,57E-01 | 9,44E-01 |
| CPN1            | -1,01 | 8,57E-01 | 9,44E-01 |
| TRAPPC5         | 1,01  | 8,57E-01 | 9,44E-01 |
| THC2364724      | 1,01  | 8,57E-01 | 9,44E-01 |
| AL565381        | 1,01  | 8,57E-01 | 9,44E-01 |
| AF147723        | 1,01  | 8,57E-01 | 9,44E-01 |
| BC009366        | -1,01 | 8,58E-01 | 9,44E-01 |
| AA814934        | -1,04 | 8,58E-01 | 9,44E-01 |
| THC2395378      | -1,02 | 8,58E-01 | 9,44E-01 |
| A_24_P247493    | -1,01 | 8,58E-01 | 9,44E-01 |
| LOC388886       | -1,01 | 8,58E-01 | 9,44E-01 |
| DUS1L           | 1,01  | 8,58E-01 | 9,44E-01 |
| A_24_P914797    | 1,01  | 8,58E-01 | 9,44E-01 |
| AYP1p1          | 1,01  | 8,58E-01 | 9,44E-01 |
| DRD1IP          | 1,01  | 8,58E-01 | 9,44E-01 |
| BQ897248        | 1,02  | 8,58E-01 | 9,44E-01 |
| C4BPA           | -1,01 | 8,58E-01 | 9,44E-01 |
| ENST00000344415 | -1,01 | 8,58E-01 | 9,44E-01 |
| BX113452        | 1,01  | 8,58E-01 | 9,44E-01 |
| C3orf23         | -1,01 | 8,58E-01 | 9,44E-01 |
| KLK4            | -1,01 | 8,58E-01 | 9,45E-01 |
| DKFZp434K191    | 1,01  | 8,58E-01 | 9,45E-01 |
| LY9             | 1,01  | 8,58E-01 | 9,45E-01 |
| SDHAL2          | -1,01 | 8,58E-01 | 9,45E-01 |
| TRAM2           | -1,01 | 8,59E-01 | 9,45E-01 |
| AA436260        | 1,01  | 8,58E-01 | 9,45E-01 |
| AK022356        | -1,01 | 8,59E-01 | 9,45E-01 |
| OPN1MW          | -1,01 | 8,59E-01 | 9,45E-01 |
| LSAMP           | 1,02  | 8,59E-01 | 9,45E-01 |
| A_24_P891265    | -1,01 | 8,59E-01 | 9,45E-01 |
| AV757313        | -1,03 | 8,59E-01 | 9,45E-01 |
| SH3BP2          | -1,01 | 8,59E-01 | 9,45E-01 |
| CLDN8           | 1,01  | 8,59E-01 | 9,45E-01 |

|                        |       |          |          |
|------------------------|-------|----------|----------|
| <i>A_24_P925201</i>    | -1,01 | 8,59E-01 | 9,45E-01 |
| <i>BX100535</i>        | -1,01 | 8,59E-01 | 9,45E-01 |
| <i>FUNDC1</i>          | -1,01 | 8,59E-01 | 9,45E-01 |
| <i>ORM2</i>            | -1,01 | 8,59E-01 | 9,45E-01 |
| <i>NBPF4</i>           | 1,01  | 8,59E-01 | 9,45E-01 |
| <i>FVT1</i>            | 1,01  | 8,59E-01 | 9,45E-01 |
| <i>A_24_P20623</i>     | 1,01  | 8,59E-01 | 9,45E-01 |
| <i>C3orf29</i>         | 1,01  | 8,59E-01 | 9,45E-01 |
| <i>COPS8</i>           | -1,01 | 8,60E-01 | 9,45E-01 |
| <i>TMDCII</i>          | 1,01  | 8,60E-01 | 9,45E-01 |
| <i>BF063428</i>        | -1,01 | 8,60E-01 | 9,45E-01 |
| <i>NCF1</i>            | 1,01  | 8,60E-01 | 9,45E-01 |
| <i>ENST00000310903</i> | 1,00  | 8,60E-01 | 9,45E-01 |
| <i>ELAVL4</i>          | 1,00  | 8,60E-01 | 9,45E-01 |
| <i>USP3</i>            | 1,00  | 8,60E-01 | 9,45E-01 |
| <i>LSMD1</i>           | 1,01  | 8,60E-01 | 9,45E-01 |
| <i>PK2</i>             | -1,01 | 8,60E-01 | 9,46E-01 |
| <i>ENST00000313516</i> | -1,01 | 8,60E-01 | 9,46E-01 |
| <i>THC2330219</i>      | -1,01 | 8,60E-01 | 9,46E-01 |
| <i>U05589</i>          | 1,01  | 8,60E-01 | 9,46E-01 |
| <i>IL1A</i>            | 1,04  | 8,60E-01 | 9,46E-01 |
| <i>VEZT</i>            | 1,01  | 8,60E-01 | 9,46E-01 |
| <i>A_23_P254330</i>    | 1,01  | 8,60E-01 | 9,46E-01 |
| <i>PPEF1</i>           | 1,01  | 8,60E-01 | 9,46E-01 |
| <i>NUDT5</i>           | 1,01  | 8,60E-01 | 9,46E-01 |
| <i>THC2341060</i>      | -1,01 | 8,61E-01 | 9,46E-01 |
| <i>A_24_P306964</i>    | -1,02 | 8,61E-01 | 9,46E-01 |
| <i>SH3GL2</i>          | -1,01 | 8,61E-01 | 9,46E-01 |
| <i>AF132204</i>        | -1,01 | 8,61E-01 | 9,46E-01 |
| <i>AK094219</i>        | 1,01  | 8,61E-01 | 9,46E-01 |
| <i>DPF1</i>            | 1,01  | 8,61E-01 | 9,46E-01 |
| <i>A_23_P90470</i>     | 1,01  | 8,61E-01 | 9,46E-01 |
| <i>PRSSL1</i>          | -1,05 | 8,62E-01 | 9,46E-01 |
| <i>RHOV</i>            | -1,04 | 8,61E-01 | 9,46E-01 |
| <i>A_24_P41662</i>     | -1,03 | 8,61E-01 | 9,46E-01 |
| <i>NGFR</i>            | -1,02 | 8,61E-01 | 9,46E-01 |
| <i>C21orf88</i>        | -1,01 | 8,62E-01 | 9,46E-01 |
| <i>THC2344910</i>      | -1,01 | 8,62E-01 | 9,46E-01 |
| <i>KIAA1618</i>        | -1,01 | 8,62E-01 | 9,46E-01 |
| <i>ST13</i>            | -1,01 | 8,61E-01 | 9,46E-01 |
| <i>AK098514</i>        | -1,01 | 8,62E-01 | 9,46E-01 |
| <i>A_24_P911950</i>    | -1,01 | 8,62E-01 | 9,46E-01 |
| <i>MYT1L</i>           | 1,01  | 8,61E-01 | 9,46E-01 |
| <i>ADI1</i>            | 1,01  | 8,62E-01 | 9,46E-01 |

|                        |       |          |          |
|------------------------|-------|----------|----------|
| <i>ARMC6</i>           | 1,01  | 8,61E-01 | 9,46E-01 |
| <i>BM674777</i>        | 1,01  | 8,61E-01 | 9,46E-01 |
| <i>GTPBP3</i>          | 1,01  | 8,61E-01 | 9,46E-01 |
| <i>PRO1073</i>         | 1,01  | 8,62E-01 | 9,46E-01 |
| <i>C14orf120</i>       | 1,01  | 8,62E-01 | 9,46E-01 |
| <i>TTC7B</i>           | 1,01  | 8,62E-01 | 9,46E-01 |
| <i>THC2280883</i>      | 1,01  | 8,61E-01 | 9,46E-01 |
| <i>TUBB</i>            | 1,01  | 8,62E-01 | 9,46E-01 |
| <i>AW197343</i>        | 1,01  | 8,62E-01 | 9,46E-01 |
| <i>THC2407541</i>      | 1,02  | 8,62E-01 | 9,46E-01 |
| <i>RPS26</i>           | 1,02  | 8,62E-01 | 9,46E-01 |
| <i>ATCAY</i>           | 1,02  | 8,62E-01 | 9,46E-01 |
| <i>AW166562</i>        | 1,04  | 8,61E-01 | 9,46E-01 |
| <i>KCNC3</i>           | 1,05  | 8,62E-01 | 9,46E-01 |
| <i>TCEA3</i>           | 1,08  | 8,61E-01 | 9,46E-01 |
| <i>A_24_P925678</i>    | 1,01  | 8,62E-01 | 9,46E-01 |
| <i>A_24_P238868</i>    | -1,01 | 8,62E-01 | 9,46E-01 |
| <i>BF663308</i>        | -1,01 | 8,62E-01 | 9,46E-01 |
| <i>ENST00000328270</i> | -1,00 | 8,62E-01 | 9,46E-01 |
| <i>A_24_P410000</i>    | 1,01  | 8,62E-01 | 9,46E-01 |
| <i>LOC645158</i>       | -1,01 | 8,62E-01 | 9,46E-01 |
| <i>KCNV1</i>           | 1,01  | 8,62E-01 | 9,46E-01 |
| <i>A_24_P587938</i>    | 1,01  | 8,62E-01 | 9,46E-01 |
| <i>AF339771</i>        | -1,01 | 8,62E-01 | 9,46E-01 |
| <i>FAM122A</i>         | 1,01  | 8,62E-01 | 9,46E-01 |
| <i>TFRC</i>            | 1,02  | 8,62E-01 | 9,46E-01 |
| <i>NUCB2</i>           | 1,02  | 8,62E-01 | 9,46E-01 |
| <i>WBSCR23</i>         | 1,01  | 8,63E-01 | 9,47E-01 |
| <i>DNAJA5</i>          | 1,01  | 8,63E-01 | 9,47E-01 |
| <i>AK128192</i>        | -1,01 | 8,63E-01 | 9,47E-01 |
| <i>KCNH7</i>           | 1,01  | 8,63E-01 | 9,47E-01 |
| <i>PI4K2B</i>          | 1,01  | 8,63E-01 | 9,47E-01 |
| <i>AV722457</i>        | -1,01 | 8,63E-01 | 9,47E-01 |
| <i>BG943724</i>        | -1,01 | 8,63E-01 | 9,47E-01 |
| <i>AK129838</i>        | 1,01  | 8,63E-01 | 9,47E-01 |
| <i>B3GAT2</i>          | -1,01 | 8,63E-01 | 9,47E-01 |
| <i>LRP3</i>            | -1,01 | 8,63E-01 | 9,47E-01 |
| <i>ATP6V1C1</i>        | 1,01  | 8,63E-01 | 9,47E-01 |
| <i>AKR1B10</i>         | 1,06  | 8,63E-01 | 9,47E-01 |
| <i>A_24_P279760</i>    | -1,01 | 8,64E-01 | 9,47E-01 |
| <i>PKIB</i>            | -1,01 | 8,64E-01 | 9,47E-01 |
| <i>BTF3</i>            | -1,01 | 8,64E-01 | 9,47E-01 |
| <i>TROVE2</i>          | 1,01  | 8,64E-01 | 9,47E-01 |
| <i>SNAPAP</i>          | 1,01  | 8,64E-01 | 9,47E-01 |

|                        |       |          |          |
|------------------------|-------|----------|----------|
| <i>AF161342</i>        | 1,01  | 8,64E-01 | 9,47E-01 |
| <i>A_24_P470794</i>    | 1,01  | 8,64E-01 | 9,47E-01 |
| <i>FOXD1</i>           | -1,01 | 8,64E-01 | 9,47E-01 |
| <i>FAM38A</i>          | -1,01 | 8,64E-01 | 9,47E-01 |
| <i>THC2421989</i>      | 1,00  | 8,64E-01 | 9,47E-01 |
| <i>ENST00000292729</i> | 1,01  | 8,64E-01 | 9,47E-01 |
| <i>VRK3</i>            | 1,01  | 8,64E-01 | 9,47E-01 |
| <i>SLC25A1</i>         | 1,01  | 8,64E-01 | 9,47E-01 |
| <i>SCGB1D1</i>         | -1,02 | 8,64E-01 | 9,47E-01 |
| <i>TINP1</i>           | -1,01 | 8,64E-01 | 9,47E-01 |
| <i>LOC283824</i>       | -1,01 | 8,64E-01 | 9,47E-01 |
| <i>A_32_P162322</i>    | -1,01 | 8,64E-01 | 9,47E-01 |
| <i>ZDHHC24</i>         | 1,01  | 8,64E-01 | 9,47E-01 |
| <i>ADAM18</i>          | 1,01  | 8,64E-01 | 9,47E-01 |
| <i>AW631496</i>        | 1,01  | 8,64E-01 | 9,47E-01 |
| <i>THC2281914</i>      | 1,01  | 8,64E-01 | 9,47E-01 |
| <i>PKP3</i>            | -1,05 | 8,64E-01 | 9,47E-01 |
| <i>AK000146</i>        | 1,01  | 8,64E-01 | 9,47E-01 |
| <i>POU4F2</i>          | 1,01  | 8,64E-01 | 9,47E-01 |
| <i>CRLS1</i>           | -1,01 | 8,65E-01 | 9,47E-01 |
| <i>AJ002785</i>        | -1,01 | 8,65E-01 | 9,47E-01 |
| <i>C17orf50</i>        | -1,01 | 8,65E-01 | 9,47E-01 |
| <i>BAT2</i>            | -1,01 | 8,65E-01 | 9,47E-01 |
| <i>SLC30A2</i>         | -1,00 | 8,65E-01 | 9,47E-01 |
| <i>PHKG1</i>           | -1,01 | 8,65E-01 | 9,47E-01 |
| <i>GPX2</i>            | 1,02  | 8,65E-01 | 9,47E-01 |
| <i>A_24_P298928</i>    | 1,02  | 8,65E-01 | 9,47E-01 |
| <i>NAGPA</i>           | -1,01 | 8,65E-01 | 9,48E-01 |
| <i>C8orf40</i>         | 1,01  | 8,65E-01 | 9,48E-01 |
| <i>A_24_P511776</i>    | -1,01 | 8,65E-01 | 9,48E-01 |
| <i>BC020899</i>        | 1,02  | 8,65E-01 | 9,48E-01 |
| <i>PCDH15</i>          | 1,01  | 8,65E-01 | 9,48E-01 |
| <i>DHRS8</i>           | -1,02 | 8,65E-01 | 9,48E-01 |
| <i>AF111850</i>        | -1,01 | 8,65E-01 | 9,48E-01 |
| <i>A_24_P922331</i>    | -1,01 | 8,65E-01 | 9,48E-01 |
| <i>THC2397695</i>      | 1,01  | 8,65E-01 | 9,48E-01 |
| <i>U52054</i>          | 1,01  | 8,65E-01 | 9,48E-01 |
| <i>ENST00000375521</i> | -1,01 | 8,65E-01 | 9,48E-01 |
| <i>A_32_P71183</i>     | 1,01  | 8,66E-01 | 9,48E-01 |
| <i>C5orf4</i>          | -1,02 | 8,66E-01 | 9,48E-01 |
| <i>X92185</i>          | -1,01 | 8,66E-01 | 9,48E-01 |
| <i>AYP1</i>            | -1,01 | 8,66E-01 | 9,48E-01 |
| <i>VNN3</i>            | -1,01 | 8,66E-01 | 9,48E-01 |
| <i>A_32_P72682</i>     | 1,01  | 8,66E-01 | 9,48E-01 |

|                        |       |          |          |
|------------------------|-------|----------|----------|
| <i>UTP20</i>           | 1,01  | 8,66E-01 | 9,48E-01 |
| <i>MOCS1</i>           | 1,01  | 8,66E-01 | 9,48E-01 |
| <i>AB007971</i>        | 1,01  | 8,66E-01 | 9,48E-01 |
| <i>ST3GAL6</i>         | 1,01  | 8,66E-01 | 9,48E-01 |
| <i>KIAA1772</i>        | 1,02  | 8,66E-01 | 9,48E-01 |
| <i>AF034207</i>        | 1,02  | 8,66E-01 | 9,48E-01 |
| <i>DAPK1</i>           | -1,01 | 8,66E-01 | 9,48E-01 |
| <i>FNDC8</i>           | -1,01 | 8,66E-01 | 9,48E-01 |
| <i>THC2409614</i>      | -1,01 | 8,66E-01 | 9,48E-01 |
| <i>ITGB3BP</i>         | 1,01  | 8,66E-01 | 9,48E-01 |
| <i>ATHL1</i>           | 1,02  | 8,66E-01 | 9,48E-01 |
| <i>LOC348174</i>       | 1,01  | 8,66E-01 | 9,48E-01 |
| <i>AK026869</i>        | 1,01  | 8,66E-01 | 9,48E-01 |
| <i>KCNA7</i>           | -1,00 | 8,66E-01 | 9,48E-01 |
| <i>TOR1B</i>           | 1,01  | 8,66E-01 | 9,48E-01 |
| <i>COPZ2</i>           | 1,02  | 8,66E-01 | 9,48E-01 |
| <i>ENST00000359354</i> | -1,01 | 8,66E-01 | 9,48E-01 |
| <i>RNF141</i>          | -1,01 | 8,67E-01 | 9,48E-01 |
| <i>A_24_P221375</i>    | -1,01 | 8,67E-01 | 9,49E-01 |
| <i>ENST00000246083</i> | -1,01 | 8,67E-01 | 9,49E-01 |
| <i>GUSB</i>            | -1,01 | 8,67E-01 | 9,49E-01 |
| <i>AK098605</i>        | -1,01 | 8,67E-01 | 9,49E-01 |
| <i>LCE1B</i>           | -1,01 | 8,67E-01 | 9,49E-01 |
| <i>A_24_P67748</i>     | 1,01  | 8,67E-01 | 9,49E-01 |
| <i>AW445156</i>        | 1,01  | 8,67E-01 | 9,49E-01 |
| <i>NRG4</i>            | 1,01  | 8,67E-01 | 9,49E-01 |
| <i>A_24_P409402</i>    | 1,02  | 8,67E-01 | 9,49E-01 |
| <i>ARSA</i>            | 1,07  | 8,67E-01 | 9,49E-01 |
| <i>ENPP1</i>           | -1,01 | 8,67E-01 | 9,49E-01 |
| <i>CAT</i>             | -1,01 | 8,67E-01 | 9,49E-01 |
| <i>ACF</i>             | -1,01 | 8,67E-01 | 9,49E-01 |
| <i>ENST00000242505</i> | -1,01 | 8,67E-01 | 9,49E-01 |
| <i>PRR3</i>            | -1,00 | 8,67E-01 | 9,49E-01 |
| <i>AK093643</i>        | 1,01  | 8,67E-01 | 9,49E-01 |
| <i>PARK7</i>           | -1,01 | 8,68E-01 | 9,49E-01 |
| <i>IGSF2</i>           | -1,01 | 8,68E-01 | 9,49E-01 |
| <i>GATS</i>            | 1,01  | 8,68E-01 | 9,49E-01 |
| <i>RXFP2</i>           | -1,01 | 8,68E-01 | 9,49E-01 |
| <i>LOC286495</i>       | -1,01 | 8,68E-01 | 9,49E-01 |
| <i>CCL1</i>            | 1,01  | 8,68E-01 | 9,49E-01 |
| <i>B4GALT2</i>         | -1,01 | 8,68E-01 | 9,49E-01 |
| <i>DKFZp547K054</i>    | -1,01 | 8,68E-01 | 9,49E-01 |
| <i>THC2411387</i>      | -1,01 | 8,68E-01 | 9,49E-01 |
| <i>THC2332714</i>      | -1,01 | 8,68E-01 | 9,49E-01 |

|                 |       |          |          |
|-----------------|-------|----------|----------|
| CLCNKB          | -1,01 | 8,68E-01 | 9,49E-01 |
| THC2406669      | -1,01 | 8,68E-01 | 9,49E-01 |
| CSMD2           | -1,00 | 8,69E-01 | 9,49E-01 |
| LOC137107       | -1,03 | 8,69E-01 | 9,49E-01 |
| ALOX12B         | -1,02 | 8,69E-01 | 9,49E-01 |
| FLJ30064        | -1,01 | 8,69E-01 | 9,49E-01 |
| LOC644374       | -1,01 | 8,69E-01 | 9,49E-01 |
| AV683301        | -1,01 | 8,69E-01 | 9,49E-01 |
| CR596789        | -1,01 | 8,69E-01 | 9,49E-01 |
| CYP19A1         | -1,01 | 8,69E-01 | 9,49E-01 |
| ZNF484          | -1,00 | 8,69E-01 | 9,49E-01 |
| SLITRK2         | -1,00 | 8,69E-01 | 9,49E-01 |
| CTNNA1          | 1,00  | 8,69E-01 | 9,49E-01 |
| FLJ25143        | 1,01  | 8,69E-01 | 9,49E-01 |
| ENST00000323057 | 1,01  | 8,69E-01 | 9,49E-01 |
| THC2441235      | 1,01  | 8,69E-01 | 9,49E-01 |
| SNORA24         | 1,01  | 8,69E-01 | 9,49E-01 |
| KIAA1303        | 1,01  | 8,69E-01 | 9,49E-01 |
| TCEAL2          | 1,01  | 8,69E-01 | 9,49E-01 |
| ENST00000372604 | 1,02  | 8,69E-01 | 9,49E-01 |
| TSPAN16         | 1,01  | 8,69E-01 | 9,50E-01 |
| A_24_P169503    | 1,01  | 8,69E-01 | 9,50E-01 |
| ENST00000316517 | 1,01  | 8,69E-01 | 9,50E-01 |
| LXN             | 1,01  | 8,69E-01 | 9,50E-01 |
| AA464246        | -1,01 | 8,69E-01 | 9,50E-01 |
| THC2407039      | -1,04 | 8,70E-01 | 9,50E-01 |
| FLJ43339        | -1,02 | 8,70E-01 | 9,50E-01 |
| FLJ25422        | -1,01 | 8,70E-01 | 9,50E-01 |
| LOC352909       | -1,01 | 8,70E-01 | 9,50E-01 |
| AI038106        | -1,01 | 8,70E-01 | 9,50E-01 |
| AX721193        | 1,01  | 8,70E-01 | 9,50E-01 |
| A_24_P679997    | 1,01  | 8,70E-01 | 9,50E-01 |
| A_24_P264549    | -1,03 | 8,70E-01 | 9,50E-01 |
| ZNF141          | -1,01 | 8,70E-01 | 9,50E-01 |
| A_24_P937904    | 1,01  | 8,70E-01 | 9,50E-01 |
| ZHX3            | 1,01  | 8,70E-01 | 9,50E-01 |
| MAEL            | 1,01  | 8,70E-01 | 9,50E-01 |
| THC2281298      | 1,02  | 8,70E-01 | 9,50E-01 |
| AK123264        | -1,01 | 8,70E-01 | 9,50E-01 |
| AW975410        | 1,00  | 8,70E-01 | 9,50E-01 |
| AW302758        | 1,01  | 8,70E-01 | 9,50E-01 |
| CTRB2           | -1,01 | 8,70E-01 | 9,50E-01 |
| MGC4172         | -1,01 | 8,70E-01 | 9,50E-01 |
| IL15            | 1,01  | 8,70E-01 | 9,50E-01 |



|                        |       |          |          |
|------------------------|-------|----------|----------|
| <i>BF932142</i>        | -1,01 | 8,71E-01 | 9,50E-01 |
| <i>NEK8</i>            | -1,01 | 8,71E-01 | 9,50E-01 |
| <i>KRTAP9-8</i>        | -1,01 | 8,71E-01 | 9,50E-01 |
| <i>A_32_P331700</i>    | -1,01 | 8,71E-01 | 9,50E-01 |
| <i>C18orf1</i>         | 1,01  | 8,71E-01 | 9,50E-01 |
| <i>C1orf117</i>        | -1,01 | 8,71E-01 | 9,50E-01 |
| <i>AA729924</i>        | -1,01 | 8,71E-01 | 9,50E-01 |
| <i>DSCR10</i>          | -1,01 | 8,71E-01 | 9,50E-01 |
| <i>THC2288048</i>      | -1,01 | 8,71E-01 | 9,50E-01 |
| <i>BM986936</i>        | 1,01  | 8,71E-01 | 9,50E-01 |
| <i>LCE1F</i>           | 1,01  | 8,71E-01 | 9,50E-01 |
| <i>BC021031</i>        | 1,01  | 8,71E-01 | 9,50E-01 |
| <i>A_24_P366845</i>    | 1,01  | 8,71E-01 | 9,50E-01 |
| <i>BE816155</i>        | 1,01  | 8,71E-01 | 9,50E-01 |
| <i>CFLP1</i>           | 1,01  | 8,71E-01 | 9,50E-01 |
| <i>SDF2</i>            | 1,00  | 8,71E-01 | 9,50E-01 |
| <i>BRUNOL4</i>         | 1,00  | 8,71E-01 | 9,50E-01 |
| <i>PHACTR2</i>         | 1,01  | 8,71E-01 | 9,50E-01 |
| <i>ATAD1</i>           | 1,01  | 8,71E-01 | 9,50E-01 |
| <i>FLJ21657</i>        | 1,01  | 8,71E-01 | 9,50E-01 |
| <i>SEC11L1</i>         | -1,01 | 8,71E-01 | 9,50E-01 |
| <i>TMEM129</i>         | -1,01 | 8,71E-01 | 9,50E-01 |
| <i>C6orf206</i>        | 1,01  | 8,71E-01 | 9,50E-01 |
| <i>A_24_P834646</i>    | 1,01  | 8,72E-01 | 9,50E-01 |
| <i>ALF</i>             | -1,02 | 8,72E-01 | 9,51E-01 |
| <i>AK092875</i>        | -1,01 | 8,72E-01 | 9,51E-01 |
| <i>FYN</i>             | -1,01 | 8,72E-01 | 9,51E-01 |
| <i>AK090407</i>        | -1,01 | 8,72E-01 | 9,51E-01 |
| <i>ENST00000272748</i> | -1,01 | 8,72E-01 | 9,51E-01 |
| <i>ANKMY2</i>          | -1,01 | 8,72E-01 | 9,51E-01 |
| <i>THC2410387</i>      | -1,01 | 8,72E-01 | 9,51E-01 |
| <i>BIRC2</i>           | -1,01 | 8,72E-01 | 9,51E-01 |
| <i>THC2405695</i>      | 1,00  | 8,72E-01 | 9,51E-01 |
| <i>PCDHGA5</i>         | 1,01  | 8,72E-01 | 9,51E-01 |
| <i>THC2281896</i>      | 1,01  | 8,72E-01 | 9,51E-01 |
| <i>RBM19</i>           | 1,01  | 8,72E-01 | 9,51E-01 |
| <i>GTF2F1</i>          | 1,01  | 8,72E-01 | 9,51E-01 |
| <i>KLHL2</i>           | 1,01  | 8,72E-01 | 9,51E-01 |
| <i>FLJ30596</i>        | 1,01  | 8,72E-01 | 9,51E-01 |
| <i>CLEC4C</i>          | 1,01  | 8,72E-01 | 9,51E-01 |
| <i>SSX8</i>            | 1,01  | 8,72E-01 | 9,51E-01 |
| <i>C10orf93</i>        | 1,01  | 8,72E-01 | 9,51E-01 |
| <i>BC010432</i>        | 1,01  | 8,72E-01 | 9,51E-01 |
| <i>SLC6A16</i>         | -1,01 | 8,72E-01 | 9,51E-01 |

|                        |       |          |          |
|------------------------|-------|----------|----------|
| <i>FLJ40113</i>        | -1,01 | 8,72E-01 | 9,51E-01 |
| <i>RP11-11C5.2</i>     | -1,01 | 8,73E-01 | 9,51E-01 |
| <i>SS18L1</i>          | -1,01 | 8,73E-01 | 9,51E-01 |
| <i>THC2258710</i>      | -1,01 | 8,73E-01 | 9,51E-01 |
| <i>A_32_P201792</i>    | -1,01 | 8,73E-01 | 9,51E-01 |
| <i>SBNO1</i>           | 1,01  | 8,73E-01 | 9,51E-01 |
| <i>FMN2</i>            | 1,01  | 8,73E-01 | 9,51E-01 |
| <i>AF119852</i>        | 1,01  | 8,73E-01 | 9,51E-01 |
| <i>A_24_P913517</i>    | 1,01  | 8,73E-01 | 9,51E-01 |
| <i>TTBK1</i>           | -1,01 | 8,73E-01 | 9,51E-01 |
| <i>A_24_P631948</i>    | -1,02 | 8,73E-01 | 9,51E-01 |
| <i>DEFA1</i>           | -1,01 | 8,73E-01 | 9,51E-01 |
| <i>ZNF507</i>          | -1,01 | 8,73E-01 | 9,51E-01 |
| <i>LOC646890</i>       | -1,01 | 8,73E-01 | 9,51E-01 |
| <i>LOC90826</i>        | 1,01  | 8,73E-01 | 9,51E-01 |
| <i>BC031882</i>        | -1,01 | 8,73E-01 | 9,51E-01 |
| <i>AK097508</i>        | -1,01 | 8,73E-01 | 9,51E-01 |
| <i>FAM14B</i>          | 1,01  | 8,73E-01 | 9,51E-01 |
| <i>ENST00000382261</i> | 1,05  | 8,73E-01 | 9,51E-01 |
| <i>THC2432858</i>      | -1,01 | 8,73E-01 | 9,51E-01 |
| <i>A_32_P202621</i>    | 1,01  | 8,73E-01 | 9,51E-01 |
| <i>THC2372297</i>      | 1,02  | 8,73E-01 | 9,51E-01 |
| <i>AQP7</i>            | -1,01 | 8,74E-01 | 9,51E-01 |
| <i>HSPH1</i>           | -1,01 | 8,74E-01 | 9,51E-01 |
| <i>THC2411678</i>      | -1,01 | 8,74E-01 | 9,51E-01 |
| <i>C3orf51</i>         | -1,01 | 8,73E-01 | 9,51E-01 |
| <i>NTF5</i>            | -1,01 | 8,74E-01 | 9,51E-01 |
| <i>U88048</i>          | -1,01 | 8,74E-01 | 9,51E-01 |
| <i>KRTAP10-10</i>      | -1,01 | 8,74E-01 | 9,51E-01 |
| <i>DLAT</i>            | -1,01 | 8,74E-01 | 9,51E-01 |
| <i>SCAMP3</i>          | -1,00 | 8,74E-01 | 9,51E-01 |
| <i>ENST00000295628</i> | 1,01  | 8,74E-01 | 9,51E-01 |
| <i>VPS11</i>           | 1,01  | 8,74E-01 | 9,51E-01 |
| <i>SUDS3</i>           | 1,01  | 8,74E-01 | 9,51E-01 |
| <i>THC2251863</i>      | 1,01  | 8,74E-01 | 9,51E-01 |
| <i>OCLM</i>            | 1,01  | 8,74E-01 | 9,51E-01 |
| <i>CDC42EP4</i>        | 1,01  | 8,74E-01 | 9,51E-01 |
| <i>SELV</i>            | 1,01  | 8,74E-01 | 9,51E-01 |
| <i>TGFB111</i>         | 1,01  | 8,74E-01 | 9,51E-01 |
| <i>PLXND1</i>          | -1,01 | 8,74E-01 | 9,51E-01 |
| <i>EHBP1</i>           | -1,01 | 8,74E-01 | 9,51E-01 |
| <i>FAM41C</i>          | 1,00  | 8,74E-01 | 9,51E-01 |
| <i>ETFA</i>            | 1,01  | 8,74E-01 | 9,51E-01 |
| <i>A_24_P230248</i>    | 1,01  | 8,74E-01 | 9,51E-01 |

|                        |       |          |          |
|------------------------|-------|----------|----------|
| <i>CINP</i>            | -1,01 | 8,74E-01 | 9,51E-01 |
| <i>ENST00000247761</i> | 1,02  | 8,74E-01 | 9,51E-01 |
| <i>FAM86C</i>          | 1,01  | 8,74E-01 | 9,51E-01 |
| <i>ABCB11</i>          | 1,01  | 8,75E-01 | 9,52E-01 |
| <i>THC2340622</i>      | -1,01 | 8,75E-01 | 9,52E-01 |
| <i>SFRS4</i>           | 1,01  | 8,75E-01 | 9,52E-01 |
| <i>A_24_P1873</i>      | -1,01 | 8,75E-01 | 9,52E-01 |
| <i>IFITM2</i>          | -1,01 | 8,75E-01 | 9,52E-01 |
| <i>BLVRB</i>           | -1,01 | 8,75E-01 | 9,52E-01 |
| <i>A_24_P799580</i>    | 1,01  | 8,75E-01 | 9,52E-01 |
| <i>THC2290858</i>      | 1,01  | 8,75E-01 | 9,52E-01 |
| <i>AKO55501</i>        | -1,01 | 8,75E-01 | 9,52E-01 |
| <i>SIPA1L3</i>         | -1,01 | 8,75E-01 | 9,52E-01 |
| <i>SIRPB1</i>          | -1,00 | 8,75E-01 | 9,52E-01 |
| <i>SLC4A10</i>         | 1,01  | 8,75E-01 | 9,52E-01 |
| <i>C14orf48</i>        | -1,00 | 8,75E-01 | 9,52E-01 |
| <i>HLA-F</i>           | -1,01 | 8,75E-01 | 9,52E-01 |
| <i>ASB16</i>           | -1,01 | 8,75E-01 | 9,52E-01 |
| <i>PDCD6IP</i>         | 1,00  | 8,75E-01 | 9,52E-01 |
| <i>FCHSD1</i>          | 1,01  | 8,75E-01 | 9,52E-01 |
| <i>MRPL2</i>           | 1,01  | 8,75E-01 | 9,52E-01 |
| <i>ENST00000305319</i> | -1,02 | 8,76E-01 | 9,52E-01 |
| <i>A_24_P730256</i>    | -1,02 | 8,76E-01 | 9,52E-01 |
| <i>PCDHGB2</i>         | -1,01 | 8,76E-01 | 9,52E-01 |
| <i>A_23_P42595</i>     | -1,01 | 8,76E-01 | 9,52E-01 |
| <i>ASMTL</i>           | -1,00 | 8,76E-01 | 9,52E-01 |
| <i>NDUFC2</i>          | 1,01  | 8,76E-01 | 9,52E-01 |
| <i>A_24_P742420</i>    | 1,01  | 8,76E-01 | 9,52E-01 |
| <i>MLX</i>             | -1,00 | 8,76E-01 | 9,52E-01 |
| <i>CLCA2</i>           | -1,03 | 8,76E-01 | 9,52E-01 |
| <i>A_24_P152792</i>    | 1,01  | 8,76E-01 | 9,52E-01 |
| <i>A_24_P918693</i>    | -1,01 | 8,76E-01 | 9,52E-01 |
| <i>ENST00000277575</i> | 1,01  | 8,76E-01 | 9,52E-01 |
| <i>LZTS2</i>           | -1,01 | 8,76E-01 | 9,52E-01 |
| <i>FKSG24</i>          | -1,01 | 8,76E-01 | 9,52E-01 |
| <i>ENST00000260303</i> | -1,00 | 8,76E-01 | 9,52E-01 |
| <i>ACE</i>             | 1,00  | 8,76E-01 | 9,52E-01 |
| <i>GLDC</i>            | 1,01  | 8,76E-01 | 9,52E-01 |
| <i>THC2313828</i>      | 1,01  | 8,76E-01 | 9,52E-01 |
| <i>RAG2</i>            | 1,01  | 8,76E-01 | 9,52E-01 |
| <i>A_24_P701582</i>    | 1,01  | 8,76E-01 | 9,52E-01 |
| <i>KIAA1900</i>        | 1,01  | 8,76E-01 | 9,52E-01 |
| <i>CR621710</i>        | 1,01  | 8,76E-01 | 9,52E-01 |
| <i>C14orf83</i>        | 1,01  | 8,76E-01 | 9,52E-01 |

|                        |       |          |          |
|------------------------|-------|----------|----------|
| <i>DDX23</i>           | -1,01 | 8,76E-01 | 9,52E-01 |
| <i>TAGLN</i>           | 1,02  | 8,76E-01 | 9,52E-01 |
| <i>ERVK6</i>           | 1,01  | 8,77E-01 | 9,52E-01 |
| <i>KIAA1914</i>        | 1,01  | 8,77E-01 | 9,52E-01 |
| <i>SPEG</i>            | -1,02 | 8,77E-01 | 9,52E-01 |
| <i>LASS4</i>           | -1,01 | 8,77E-01 | 9,52E-01 |
| <i>ZDHHC17</i>         | -1,01 | 8,77E-01 | 9,52E-01 |
| <i>AF116629</i>        | 1,01  | 8,77E-01 | 9,52E-01 |
| <i>RASGEF1A</i>        | 1,02  | 8,77E-01 | 9,52E-01 |
| <i>NDUFA9</i>          | 1,01  | 8,77E-01 | 9,52E-01 |
| <i>C20orf175</i>       | -1,02 | 8,77E-01 | 9,53E-01 |
| <i>RASD2</i>           | -1,01 | 8,77E-01 | 9,53E-01 |
| <i>SNX27</i>           | -1,01 | 8,77E-01 | 9,53E-01 |
| <i>BU618438</i>        | -1,01 | 8,77E-01 | 9,53E-01 |
| <i>NDFIP1</i>          | -1,00 | 8,77E-01 | 9,53E-01 |
| <i>ACSL3</i>           | 1,01  | 8,77E-01 | 9,53E-01 |
| <i>VGLL3</i>           | 1,01  | 8,77E-01 | 9,53E-01 |
| <i>VPS13D</i>          | 1,00  | 8,77E-01 | 9,53E-01 |
| <i>BI963219</i>        | 1,01  | 8,77E-01 | 9,53E-01 |
| <i>BC026359</i>        | 1,01  | 8,77E-01 | 9,53E-01 |
| <i>THC2274362</i>      | -1,01 | 8,78E-01 | 9,53E-01 |
| <i>BSG</i>             | -1,01 | 8,78E-01 | 9,53E-01 |
| <i>SYNPO2L</i>         | 1,01  | 8,78E-01 | 9,53E-01 |
| <i>ZNF625</i>          | -1,01 | 8,78E-01 | 9,53E-01 |
| <i>TMEM159</i>         | 1,01  | 8,78E-01 | 9,53E-01 |
| <i>FCGR3A</i>          | -1,02 | 8,78E-01 | 9,53E-01 |
| <i>PX19</i>            | -1,01 | 8,78E-01 | 9,53E-01 |
| <i>LAMC2</i>           | 1,01  | 8,78E-01 | 9,53E-01 |
| <i>ENST00000311232</i> | 1,03  | 8,78E-01 | 9,53E-01 |
| <i>RNF113B</i>         | -1,01 | 8,78E-01 | 9,53E-01 |
| <i>TAS2R16</i>         | -1,01 | 8,78E-01 | 9,53E-01 |
| <i>TFAP2D</i>          | -1,01 | 8,78E-01 | 9,53E-01 |
| <i>TBKBP1</i>          | 1,01  | 8,78E-01 | 9,53E-01 |
| <i>RAC3</i>            | 1,01  | 8,78E-01 | 9,53E-01 |
| <i>THC2406077</i>      | 1,01  | 8,78E-01 | 9,53E-01 |
| <i>TCEA1</i>           | 1,00  | 8,78E-01 | 9,53E-01 |
| <i>ENST00000304016</i> | -1,03 | 8,78E-01 | 9,53E-01 |
| <i>IL27</i>            | 1,03  | 8,78E-01 | 9,53E-01 |
| <i>THC2341080</i>      | -1,01 | 8,79E-01 | 9,53E-01 |
| <i>BX089493</i>        | 1,01  | 8,79E-01 | 9,53E-01 |
| <i>DDB2</i>            | 1,01  | 8,78E-01 | 9,53E-01 |
| <i>DA383986</i>        | 1,00  | 8,79E-01 | 9,53E-01 |
| <i>RAB28</i>           | -1,05 | 8,79E-01 | 9,53E-01 |
| <i>C20orf166</i>       | -1,01 | 8,79E-01 | 9,53E-01 |

|                        |       |          |          |
|------------------------|-------|----------|----------|
| <i>A_24_P41540</i>     | -1,01 | 8,79E-01 | 9,53E-01 |
| <i>SPARCL1</i>         | -1,01 | 8,79E-01 | 9,53E-01 |
| <i>SPINK1</i>          | -1,01 | 8,79E-01 | 9,53E-01 |
| <i>YPEL5</i>           | -1,01 | 8,79E-01 | 9,53E-01 |
| <i>A_24_P195974</i>    | -1,01 | 8,79E-01 | 9,53E-01 |
| <i>AF024693</i>        | -1,01 | 8,79E-01 | 9,53E-01 |
| <i>VGLL2</i>           | -1,00 | 8,79E-01 | 9,53E-01 |
| <i>SMR3B</i>           | 1,01  | 8,79E-01 | 9,53E-01 |
| <i>AF083120</i>        | 1,01  | 8,79E-01 | 9,53E-01 |
| <i>THC2366887</i>      | 1,01  | 8,79E-01 | 9,53E-01 |
| <i>C17orf28</i>        | 1,01  | 8,79E-01 | 9,53E-01 |
| <i>CBLC</i>            | 1,02  | 8,79E-01 | 9,53E-01 |
| <i>PARL</i>            | 1,07  | 8,79E-01 | 9,53E-01 |
| <i>ENST00000308603</i> | -1,01 | 8,79E-01 | 9,53E-01 |
| <i>A_32_P212820</i>    | -1,00 | 8,79E-01 | 9,53E-01 |
| <i>ENST00000330336</i> | -1,01 | 8,79E-01 | 9,53E-01 |
| <i>EHHADH</i>          | -1,01 | 8,79E-01 | 9,53E-01 |
| <i>BU633383</i>        | -1,01 | 8,79E-01 | 9,53E-01 |
| <i>SERPINB3</i>        | -1,08 | 8,80E-01 | 9,53E-01 |
| <i>THC2275974</i>      | -1,03 | 8,80E-01 | 9,53E-01 |
| <i>THC2315854</i>      | -1,01 | 8,79E-01 | 9,53E-01 |
| <i>AK130038</i>        | 1,01  | 8,80E-01 | 9,53E-01 |
| <i>AK129879</i>        | -1,01 | 8,80E-01 | 9,53E-01 |
| <i>A_24_P281304</i>    | -1,01 | 8,80E-01 | 9,53E-01 |
| <i>THC2443801</i>      | -1,01 | 8,80E-01 | 9,53E-01 |
| <i>DKFZP586P0123</i>   | 1,01  | 8,80E-01 | 9,53E-01 |
| <i>PHACTR1</i>         | -1,01 | 8,80E-01 | 9,53E-01 |
| <i>A_24_P15841</i>     | 1,01  | 8,80E-01 | 9,53E-01 |
| <i>LOC124220</i>       | -1,02 | 8,80E-01 | 9,54E-01 |
| <i>IL9</i>             | 1,01  | 8,80E-01 | 9,54E-01 |
| <i>C1orf160</i>        | 1,01  | 8,80E-01 | 9,54E-01 |
| <i>FRMPD1</i>          | -1,01 | 8,80E-01 | 9,54E-01 |
| <i>ENST00000354929</i> | 1,01  | 8,80E-01 | 9,54E-01 |
| <i>SLC26A8</i>         | 1,01  | 8,80E-01 | 9,54E-01 |
| <i>AW389914</i>        | 1,01  | 8,80E-01 | 9,54E-01 |
| <i>BF718543</i>        | 1,00  | 8,80E-01 | 9,54E-01 |
| <i>LHFPL3</i>          | 1,01  | 8,80E-01 | 9,54E-01 |
| <i>A_24_P843552</i>    | -1,02 | 8,80E-01 | 9,54E-01 |
| <i>THC2341873</i>      | -1,01 | 8,81E-01 | 9,54E-01 |
| <i>THC2375308</i>      | -1,01 | 8,81E-01 | 9,54E-01 |
| <i>LOC153546</i>       | -1,01 | 8,81E-01 | 9,54E-01 |
| <i>TMPRSS11F</i>       | -1,01 | 8,81E-01 | 9,54E-01 |
| <i>BC015776</i>        | -1,01 | 8,81E-01 | 9,54E-01 |
| <i>LOC653639</i>       | 1,01  | 8,81E-01 | 9,54E-01 |

|                        |       |          |          |
|------------------------|-------|----------|----------|
| <i>H3F3A</i>           | 1,01  | 8,81E-01 | 9,54E-01 |
| <i>THC2363706</i>      | -1,02 | 8,81E-01 | 9,54E-01 |
| <i>CR596550</i>        | -1,01 | 8,81E-01 | 9,54E-01 |
| <i>C17orf41</i>        | -1,00 | 8,81E-01 | 9,54E-01 |
| <i>A_24_P383901</i>    | 1,02  | 8,81E-01 | 9,54E-01 |
| <i>CHD4</i>            | 1,01  | 8,81E-01 | 9,54E-01 |
| <i>GFAP</i>            | -1,02 | 8,81E-01 | 9,54E-01 |
| <i>AF279780</i>        | -1,01 | 8,81E-01 | 9,54E-01 |
| <i>ALOX15</i>          | -1,00 | 8,81E-01 | 9,54E-01 |
| <i>A_24_P212949</i>    | 1,01  | 8,81E-01 | 9,54E-01 |
| <i>THC2382145</i>      | 1,01  | 8,81E-01 | 9,54E-01 |
| <i>PCDHB2</i>          | 1,01  | 8,81E-01 | 9,54E-01 |
| <i>A_24_P935755</i>    | 1,01  | 8,81E-01 | 9,54E-01 |
| <i>CR593784</i>        | 1,01  | 8,81E-01 | 9,54E-01 |
| <i>AK094546</i>        | -1,01 | 8,82E-01 | 9,55E-01 |
| <i>HRASLS</i>          | -1,04 | 8,82E-01 | 9,55E-01 |
| <i>C17orf64</i>        | -1,01 | 8,82E-01 | 9,55E-01 |
| <i>IFNGR2</i>          | -1,01 | 8,82E-01 | 9,55E-01 |
| <i>ZNF409</i>          | 1,01  | 8,82E-01 | 9,55E-01 |
| <i>SPARC</i>           | -1,02 | 8,82E-01 | 9,55E-01 |
| <i>LOC441996</i>       | -1,01 | 8,82E-01 | 9,55E-01 |
| <i>H24400</i>          | -1,01 | 8,82E-01 | 9,55E-01 |
| <i>AK093222</i>        | 1,01  | 8,82E-01 | 9,55E-01 |
| <i>KLHL17</i>          | 1,01  | 8,82E-01 | 9,55E-01 |
| <i>ENST00000313624</i> | -1,01 | 8,82E-01 | 9,55E-01 |
| <i>AL533431</i>        | -1,01 | 8,82E-01 | 9,55E-01 |
| <i>NPB</i>             | -1,01 | 8,82E-01 | 9,55E-01 |
| <i>CCDC106</i>         | -1,01 | 8,82E-01 | 9,55E-01 |
| <i>MCTS1</i>           | 1,01  | 8,82E-01 | 9,55E-01 |
| <i>CDK8</i>            | 1,01  | 8,82E-01 | 9,55E-01 |
| <i>CR612226</i>        | -1,01 | 8,83E-01 | 9,55E-01 |
| <i>A_24_P349428</i>    | -1,00 | 8,83E-01 | 9,55E-01 |
| <i>ENST00000338386</i> | -1,00 | 8,83E-01 | 9,55E-01 |
| <i>RET</i>             | 1,00  | 8,83E-01 | 9,55E-01 |
| <i>LOC56251</i>        | 1,01  | 8,83E-01 | 9,55E-01 |
| <i>A_24_P332461</i>    | 1,01  | 8,83E-01 | 9,55E-01 |
| <i>MAPK3</i>           | 1,01  | 8,83E-01 | 9,55E-01 |
| <i>A_24_P289834</i>    | -1,01 | 8,83E-01 | 9,55E-01 |
| <i>TM4SF20</i>         | -1,01 | 8,83E-01 | 9,55E-01 |
| <i>U00954</i>          | 1,01  | 8,83E-01 | 9,55E-01 |
| <i>BI830189</i>        | -1,00 | 8,83E-01 | 9,55E-01 |
| <i>A_24_P923774</i>    | -1,02 | 8,83E-01 | 9,55E-01 |
| <i>ZNF423</i>          | -1,01 | 8,83E-01 | 9,55E-01 |
| <i>CHD3</i>            | -1,01 | 8,83E-01 | 9,55E-01 |

|                        |       |          |          |
|------------------------|-------|----------|----------|
| <i>BC032757</i>        | -1,01 | 8,83E-01 | 9,55E-01 |
| <i>KCNQ5</i>           | -1,00 | 8,83E-01 | 9,55E-01 |
| <i>K6IRS4</i>          | -1,02 | 8,84E-01 | 9,55E-01 |
| <i>SVOP</i>            | -1,01 | 8,84E-01 | 9,55E-01 |
| <i>A_24_P249187</i>    | -1,01 | 8,83E-01 | 9,55E-01 |
| <i>BC038761</i>        | -1,01 | 8,84E-01 | 9,55E-01 |
| <i>A_24_P943657</i>    | -1,01 | 8,84E-01 | 9,55E-01 |
| <i>SLC6A7</i>          | -1,00 | 8,84E-01 | 9,55E-01 |
| <i>AU148296</i>        | -1,00 | 8,84E-01 | 9,55E-01 |
| <i>THC2287361</i>      | 1,01  | 8,84E-01 | 9,55E-01 |
| <i>CBARA1</i>          | 1,01  | 8,83E-01 | 9,55E-01 |
| <i>ROBO4</i>           | 1,01  | 8,83E-01 | 9,55E-01 |
| <i>MYH10</i>           | 1,01  | 8,84E-01 | 9,55E-01 |
| <i>A_24_P144254</i>    | 1,02  | 8,83E-01 | 9,55E-01 |
| <i>A_24_P367399</i>    | 1,03  | 8,83E-01 | 9,55E-01 |
| <i>LYPD3</i>           | 1,04  | 8,83E-01 | 9,55E-01 |
| <i>BST1</i>            | 1,01  | 8,84E-01 | 9,55E-01 |
| <i>THC2436839</i>      | -1,01 | 8,84E-01 | 9,55E-01 |
| <i>LOC388135</i>       | -1,01 | 8,84E-01 | 9,55E-01 |
| <i>UBE1L</i>           | -1,01 | 8,84E-01 | 9,55E-01 |
| <i>BE881987</i>        | 1,01  | 8,84E-01 | 9,55E-01 |
| <i>MRPL55</i>          | -1,00 | 8,84E-01 | 9,55E-01 |
| <i>AF278760</i>        | 1,01  | 8,84E-01 | 9,55E-01 |
| <i>A_24_P935163</i>    | 1,02  | 8,84E-01 | 9,55E-01 |
| <i>AK054939</i>        | -1,00 | 8,84E-01 | 9,55E-01 |
| <i>A_24_P714620</i>    | 1,01  | 8,84E-01 | 9,55E-01 |
| <i>THC2282475</i>      | -1,01 | 8,84E-01 | 9,56E-01 |
| <i>HRH3</i>            | 1,00  | 8,85E-01 | 9,56E-01 |
| <i>ATG4B</i>           | -1,00 | 8,85E-01 | 9,56E-01 |
| <i>CD36</i>            | -1,02 | 8,85E-01 | 9,56E-01 |
| <i>GPR128</i>          | -1,01 | 8,85E-01 | 9,56E-01 |
| <i>FAM49A</i>          | -1,01 | 8,85E-01 | 9,56E-01 |
| <i>ENST00000361204</i> | -1,01 | 8,85E-01 | 9,56E-01 |
| <i>CK300666</i>        | -1,00 | 8,85E-01 | 9,56E-01 |
| <i>MCM3</i>            | 1,01  | 8,85E-01 | 9,56E-01 |
| <i>LOC374395</i>       | 1,00  | 8,85E-01 | 9,56E-01 |
| <i>FLJ39502</i>        | 1,01  | 8,85E-01 | 9,56E-01 |
| <i>C1orf102</i>        | -1,01 | 8,86E-01 | 9,56E-01 |
| <i>A_24_P83928</i>     | -1,01 | 8,86E-01 | 9,56E-01 |
| <i>CLEC3A</i>          | -1,01 | 8,86E-01 | 9,56E-01 |
| <i>THC2446710</i>      | -1,01 | 8,86E-01 | 9,56E-01 |
| <i>THC2405508</i>      | -1,00 | 8,86E-01 | 9,56E-01 |
| <i>ENST00000382908</i> | -1,01 | 8,86E-01 | 9,56E-01 |
| <i>A_24_P911171</i>    | -1,01 | 8,86E-01 | 9,56E-01 |

|                        |       |          |          |
|------------------------|-------|----------|----------|
| <i>ENST00000339120</i> | -1,01 | 8,86E-01 | 9,57E-01 |
| <i>GFRA2</i>           | -1,01 | 8,86E-01 | 9,57E-01 |
| <i>KRTAP1-3</i>        | 1,01  | 8,86E-01 | 9,57E-01 |
| <i>TRIM42</i>          | 1,00  | 8,86E-01 | 9,57E-01 |
| <i>CRKRS</i>           | 1,00  | 8,86E-01 | 9,57E-01 |
| <i>MICAL-L1</i>        | 1,01  | 8,86E-01 | 9,57E-01 |
| <i>THC2346208</i>      | -1,00 | 8,86E-01 | 9,57E-01 |
| <i>ENST00000263739</i> | -1,01 | 8,87E-01 | 9,57E-01 |
| <i>SCPEP1</i>          | -1,01 | 8,87E-01 | 9,57E-01 |
| <i>WRB</i>             | -1,01 | 8,87E-01 | 9,57E-01 |
| <i>TMPRSS13</i>        | -1,01 | 8,87E-01 | 9,57E-01 |
| <i>LOC146346</i>       | -1,00 | 8,87E-01 | 9,57E-01 |
| <i>CREB1</i>           | -1,00 | 8,87E-01 | 9,57E-01 |
| <i>CCDC100</i>         | 1,01  | 8,87E-01 | 9,57E-01 |
| <i>A_24_P923909</i>    | 1,01  | 8,87E-01 | 9,57E-01 |
| <i>DNAJC10</i>         | 1,01  | 8,87E-01 | 9,57E-01 |
| <i>ENST00000361080</i> | -1,01 | 8,87E-01 | 9,57E-01 |
| <i>U80773</i>          | 1,01  | 8,87E-01 | 9,57E-01 |
| <i>TMEM9B</i>          | 1,01  | 8,87E-01 | 9,57E-01 |
| <i>ENST00000380291</i> | -1,01 | 8,87E-01 | 9,57E-01 |
| <i>LOC147710</i>       | 1,01  | 8,87E-01 | 9,57E-01 |
| <i>SLC31A1</i>         | -1,01 | 8,87E-01 | 9,57E-01 |
| <i>A_24_P925471</i>    | -1,01 | 8,87E-01 | 9,57E-01 |
| <i>A_24_P919963</i>    | -1,00 | 8,87E-01 | 9,57E-01 |
| <i>VEGFB</i>           | 1,01  | 8,87E-01 | 9,57E-01 |
| <i>PDCL</i>            | 1,01  | 8,87E-01 | 9,57E-01 |
| <i>C10orf4</i>         | -1,01 | 8,88E-01 | 9,57E-01 |
| <i>YARS</i>            | 1,01  | 8,88E-01 | 9,57E-01 |
| <i>BF591978</i>        | -1,01 | 8,88E-01 | 9,58E-01 |
| <i>A_24_P930262</i>    | -1,01 | 8,88E-01 | 9,58E-01 |
| <i>ACACA</i>           | 1,01  | 8,88E-01 | 9,58E-01 |
| <i>AK124426</i>        | 1,01  | 8,88E-01 | 9,58E-01 |
| <i>ENST00000359455</i> | 1,02  | 8,88E-01 | 9,58E-01 |
| <i>A_24_P204474</i>    | -1,02 | 8,88E-01 | 9,58E-01 |
| <i>TNFSF5IP1</i>       | -1,01 | 8,88E-01 | 9,58E-01 |
| <i>CSF1</i>            | 1,00  | 8,88E-01 | 9,58E-01 |
| <i>C9orf91</i>         | 1,01  | 8,88E-01 | 9,58E-01 |
| <i>AK025975</i>        | 1,01  | 8,88E-01 | 9,58E-01 |
| <i>A_24_P884915</i>    | -1,01 | 8,88E-01 | 9,58E-01 |
| <i>TMED3</i>           | -1,01 | 8,88E-01 | 9,58E-01 |
| <i>CASP10</i>          | 1,01  | 8,88E-01 | 9,58E-01 |
| <i>A_24_P924671</i>    | 1,01  | 8,88E-01 | 9,58E-01 |
| <i>BX116657</i>        | -1,02 | 8,89E-01 | 9,58E-01 |
| <i>CIDEC</i>           | -1,01 | 8,89E-01 | 9,58E-01 |



|                        |       |          |          |
|------------------------|-------|----------|----------|
| <i>OR2W3</i>           | -1,01 | 8,88E-01 | 9,58E-01 |
| <i>A_24_P84738</i>     | -1,00 | 8,88E-01 | 9,58E-01 |
| <i>ENST00000327625</i> | 1,01  | 8,88E-01 | 9,58E-01 |
| <i>RETSAT</i>          | 1,01  | 8,88E-01 | 9,58E-01 |
| <i>AA085955</i>        | 1,01  | 8,88E-01 | 9,58E-01 |
| <i>LOC649294</i>       | 1,01  | 8,88E-01 | 9,58E-01 |
| <i>ENST00000371256</i> | 1,02  | 8,88E-01 | 9,58E-01 |
| <i>INSL5</i>           | -1,01 | 8,89E-01 | 9,58E-01 |
| <i>CDC2L5</i>          | -1,01 | 8,89E-01 | 9,58E-01 |
| <i>A_24_P409361</i>    | -1,02 | 8,89E-01 | 9,58E-01 |
| <i>C1orf201</i>        | -1,01 | 8,89E-01 | 9,58E-01 |
| <i>FSTL4</i>           | -1,01 | 8,89E-01 | 9,58E-01 |
| <i>LOC653483</i>       | 1,03  | 8,89E-01 | 9,58E-01 |
| <i>BC031316</i>        | -1,01 | 8,89E-01 | 9,58E-01 |
| <i>TGFA</i>            | 1,01  | 8,89E-01 | 9,58E-01 |
| <i>A_24_P349539</i>    | 1,01  | 8,89E-01 | 9,58E-01 |
| <i>PLAT</i>            | 1,02  | 8,89E-01 | 9,58E-01 |
| <i>FXVD4</i>           | -1,00 | 8,89E-01 | 9,58E-01 |
| <i>HNRPH2</i>          | -1,01 | 8,89E-01 | 9,58E-01 |
| <i>AEBP1</i>           | 1,01  | 8,89E-01 | 9,58E-01 |
| <i>FNTB</i>            | -1,01 | 8,89E-01 | 9,58E-01 |
| <i>H51034</i>          | 1,00  | 8,89E-01 | 9,58E-01 |
| <i>A_24_P917103</i>    | 1,01  | 8,89E-01 | 9,58E-01 |
| <i>IGF2BP1</i>         | 1,00  | 8,90E-01 | 9,58E-01 |
| <i>GRB7</i>            | 1,01  | 8,89E-01 | 9,58E-01 |
| <i>HOXA2</i>           | -1,01 | 8,90E-01 | 9,58E-01 |
| <i>A_24_P234871</i>    | -1,01 | 8,90E-01 | 9,58E-01 |
| <i>AK024315</i>        | -1,01 | 8,90E-01 | 9,58E-01 |
| <i>CAPN14</i>          | -1,00 | 8,90E-01 | 9,58E-01 |
| <i>PEPD</i>            | -1,01 | 8,90E-01 | 9,58E-01 |
| <i>NPPB</i>            | -1,01 | 8,90E-01 | 9,58E-01 |
| <i>PEBP4</i>           | 1,01  | 8,90E-01 | 9,58E-01 |
| <i>C21orf99</i>        | 1,01  | 8,90E-01 | 9,58E-01 |
| <i>A_32_P178241</i>    | -1,03 | 8,90E-01 | 9,58E-01 |
| <i>FNDC7</i>           | 1,01  | 8,90E-01 | 9,59E-01 |
| <i>ALMS1</i>           | -1,00 | 8,90E-01 | 9,59E-01 |
| <i>SCN3B</i>           | -1,01 | 8,90E-01 | 9,59E-01 |
| <i>PKP4</i>            | 1,01  | 8,91E-01 | 9,59E-01 |
| <i>A_24_P298029</i>    | -1,01 | 8,91E-01 | 9,59E-01 |
| <i>LBH</i>             | 1,01  | 8,91E-01 | 9,59E-01 |
| <i>THC2393794</i>      | -1,01 | 8,91E-01 | 9,59E-01 |
| <i>A_32_P129540</i>    | -1,01 | 8,91E-01 | 9,59E-01 |
| <i>THC2308879</i>      | 1,00  | 8,91E-01 | 9,59E-01 |
| <i>NADSYN1</i>         | 1,01  | 8,91E-01 | 9,59E-01 |

|                        |       |          |          |
|------------------------|-------|----------|----------|
| <i>BC034827</i>        | 1,01  | 8,91E-01 | 9,59E-01 |
| <i>A_24_P263983</i>    | -1,00 | 8,91E-01 | 9,59E-01 |
| <i>LYPD4</i>           | 1,01  | 8,91E-01 | 9,59E-01 |
| <i>BAK1</i>            | -1,00 | 8,91E-01 | 9,59E-01 |
| <i>CPT1B</i>           | -1,01 | 8,91E-01 | 9,59E-01 |
| <i>UBE2D4</i>          | 1,01  | 8,91E-01 | 9,59E-01 |
| <i>A_24_P401150</i>    | 1,00  | 8,91E-01 | 9,59E-01 |
| <i>CR620804</i>        | -1,01 | 8,91E-01 | 9,59E-01 |
| <i>TSCOT</i>           | -1,00 | 8,91E-01 | 9,59E-01 |
| <i>ENST00000354519</i> | -1,01 | 8,91E-01 | 9,59E-01 |
| <i>GBX2</i>            | -1,01 | 8,91E-01 | 9,59E-01 |
| <i>SGTA</i>            | -1,01 | 8,91E-01 | 9,59E-01 |
| <i>C1orf27</i>         | -1,00 | 8,91E-01 | 9,59E-01 |
| <i>A_24_P928949</i>    | 1,00  | 8,91E-01 | 9,59E-01 |
| <i>IL7R</i>            | 1,02  | 8,92E-01 | 9,59E-01 |
| <i>TBC1D23</i>         | 1,00  | 8,92E-01 | 9,59E-01 |
| <i>KCNH4</i>           | -1,00 | 8,92E-01 | 9,59E-01 |
| <i>THC2283170</i>      | -1,01 | 8,92E-01 | 9,59E-01 |
| <i>TRIM64</i>          | -1,01 | 8,92E-01 | 9,59E-01 |
| <i>THC2302090</i>      | -1,01 | 8,92E-01 | 9,59E-01 |
| <i>CPSF2</i>           | -1,01 | 8,92E-01 | 9,59E-01 |
| <i>DACH2</i>           | -1,01 | 8,92E-01 | 9,59E-01 |
| <i>TNFRSF4</i>         | -1,00 | 8,92E-01 | 9,59E-01 |
| <i>CUEDC2</i>          | -1,00 | 8,92E-01 | 9,59E-01 |
| <i>C9orf165</i>        | -1,00 | 8,92E-01 | 9,59E-01 |
| <i>SLC30A6</i>         | 1,00  | 8,92E-01 | 9,59E-01 |
| <i>CENPE</i>           | 1,00  | 8,92E-01 | 9,59E-01 |
| <i>ZRF1</i>            | 1,00  | 8,92E-01 | 9,59E-01 |
| <i>ABCG8</i>           | 1,00  | 8,92E-01 | 9,59E-01 |
| <i>BF969441</i>        | 1,01  | 8,92E-01 | 9,59E-01 |
| <i>CST11</i>           | 1,01  | 8,92E-01 | 9,59E-01 |
| <i>AI732079</i>        | 1,02  | 8,92E-01 | 9,59E-01 |
| <i>ULK2</i>            | -1,01 | 8,92E-01 | 9,59E-01 |
| <i>AI719994</i>        | -1,01 | 8,92E-01 | 9,59E-01 |
| <i>ENST00000306515</i> | -1,00 | 8,92E-01 | 9,59E-01 |
| <i>BI035281</i>        | -1,01 | 8,92E-01 | 9,60E-01 |
| <i>THC2334681</i>      | -1,01 | 8,93E-01 | 9,60E-01 |
| <i>THC2426662</i>      | 1,01  | 8,93E-01 | 9,60E-01 |
| <i>LOC653458</i>       | -1,01 | 8,93E-01 | 9,60E-01 |
| <i>RAPSN</i>           | -1,00 | 8,93E-01 | 9,60E-01 |
| <i>EZH2</i>            | 1,01  | 8,93E-01 | 9,60E-01 |
| <i>MAP2K1IP1</i>       | -1,01 | 8,93E-01 | 9,60E-01 |
| <i>AHNAK</i>           | -1,01 | 8,93E-01 | 9,60E-01 |
| <i>THC2378378</i>      | 1,01  | 8,93E-01 | 9,60E-01 |

|                        |       |          |          |
|------------------------|-------|----------|----------|
| <i>CCDC35</i>          | 1,02  | 8,93E-01 | 9,60E-01 |
| <i>ACOT8</i>           | -1,01 | 8,93E-01 | 9,60E-01 |
| <i>TRIM65</i>          | -1,00 | 8,93E-01 | 9,60E-01 |
| <i>SPCS3</i>           | 1,01  | 8,93E-01 | 9,60E-01 |
| <i>THC2364621</i>      | 1,02  | 8,93E-01 | 9,60E-01 |
| <i>AL713762</i>        | -1,01 | 8,93E-01 | 9,60E-01 |
| <i>C6orf157</i>        | -1,01 | 8,93E-01 | 9,60E-01 |
| <i>CR592082</i>        | -1,00 | 8,93E-01 | 9,60E-01 |
| <i>A_24_P698759</i>    | -1,01 | 8,93E-01 | 9,60E-01 |
| <i>ENST00000360523</i> | -1,01 | 8,93E-01 | 9,60E-01 |
| <i>C9orf31</i>         | 1,00  | 8,93E-01 | 9,60E-01 |
| <i>TUBGCP6</i>         | 1,01  | 8,93E-01 | 9,60E-01 |
| <i>A_24_P93052</i>     | 1,01  | 8,93E-01 | 9,60E-01 |
| <i>ENST00000299512</i> | 1,00  | 8,94E-01 | 9,60E-01 |
| <i>ZBTB37</i>          | -1,01 | 8,94E-01 | 9,60E-01 |
| <i>A_24_P927230</i>    | -1,00 | 8,94E-01 | 9,60E-01 |
| <i>INSL6</i>           | -1,00 | 8,94E-01 | 9,60E-01 |
| <i>TERT</i>            | -1,00 | 8,94E-01 | 9,60E-01 |
| <i>FAM92A1</i>         | 1,00  | 8,94E-01 | 9,60E-01 |
| <i>SRFBP1</i>          | 1,01  | 8,94E-01 | 9,60E-01 |
| <i>ENST00000299756</i> | 1,02  | 8,94E-01 | 9,60E-01 |
| <i>SLC44A1</i>         | 1,00  | 8,94E-01 | 9,60E-01 |
| <i>TNMD</i>            | 1,01  | 8,94E-01 | 9,60E-01 |
| <i>A_24_P358390</i>    | -1,02 | 8,94E-01 | 9,60E-01 |
| <i>ATG4A</i>           | -1,01 | 8,94E-01 | 9,60E-01 |
| <i>TRDN</i>            | 1,00  | 8,94E-01 | 9,60E-01 |
| <i>C10orf47</i>        | 1,01  | 8,94E-01 | 9,60E-01 |
| <i>LAD1</i>            | 1,03  | 8,94E-01 | 9,60E-01 |
| <i>AI669361</i>        | 1,01  | 8,94E-01 | 9,60E-01 |
| <i>NUBPL</i>           | -1,01 | 8,94E-01 | 9,60E-01 |
| <i>MGC42157</i>        | 1,01  | 8,94E-01 | 9,60E-01 |
| <i>NP186315</i>        | 1,01  | 8,95E-01 | 9,60E-01 |
| <i>BC004382</i>        | -1,01 | 8,95E-01 | 9,61E-01 |
| <i>THC2391797</i>      | 1,01  | 8,95E-01 | 9,61E-01 |
| <i>KREMEN1</i>         | -1,01 | 8,95E-01 | 9,61E-01 |
| <i>AF118084</i>        | 1,00  | 8,95E-01 | 9,61E-01 |
| <i>BST2</i>            | 1,01  | 8,95E-01 | 9,61E-01 |
| <i>THC2317432</i>      | -1,01 | 8,95E-01 | 9,61E-01 |
| <i>MRPL27</i>          | -1,00 | 8,95E-01 | 9,61E-01 |
| <i>CHST11</i>          | 1,01  | 8,95E-01 | 9,61E-01 |
| <i>SH3PXD2A</i>        | -1,01 | 8,95E-01 | 9,61E-01 |
| <i>THC2373805</i>      | 1,01  | 8,95E-01 | 9,61E-01 |
| <i>A_23_P254288</i>    | 1,01  | 8,95E-01 | 9,61E-01 |
| <i>THEX1</i>           | 1,00  | 8,95E-01 | 9,61E-01 |

|                        |       |          |          |
|------------------------|-------|----------|----------|
| <i>KRT82</i>           | 1,02  | 8,95E-01 | 9,61E-01 |
| <i>MRP63</i>           | 1,00  | 8,96E-01 | 9,61E-01 |
| <i>PCDH11X</i>         | 1,01  | 8,96E-01 | 9,61E-01 |
| <i>A_24_P845649</i>    | 1,06  | 8,96E-01 | 9,61E-01 |
| <i>A_24_P927148</i>    | -1,01 | 8,96E-01 | 9,61E-01 |
| <i>AI435484</i>        | -1,01 | 8,96E-01 | 9,61E-01 |
| <i>SPI1</i>            | -1,01 | 8,96E-01 | 9,61E-01 |
| <i>THC2376729</i>      | -1,01 | 8,96E-01 | 9,61E-01 |
| <i>THC2320632</i>      | -1,01 | 8,96E-01 | 9,61E-01 |
| <i>AK097604</i>        | -1,00 | 8,96E-01 | 9,61E-01 |
| <i>A_24_P924667</i>    | -1,00 | 8,96E-01 | 9,61E-01 |
| <i>THC2298704</i>      | -1,00 | 8,96E-01 | 9,61E-01 |
| <i>NDUFV3</i>          | -1,00 | 8,96E-01 | 9,61E-01 |
| <i>THPO</i>            | -1,00 | 8,96E-01 | 9,61E-01 |
| <i>AK092704</i>        | -1,00 | 8,97E-01 | 9,61E-01 |
| <i>BX092067</i>        | -1,00 | 8,96E-01 | 9,61E-01 |
| <i>PLRG1</i>           | 1,00  | 8,96E-01 | 9,61E-01 |
| <i>FLJ33534</i>        | 1,00  | 8,96E-01 | 9,61E-01 |
| <i>ENST00000358396</i> | 1,00  | 8,96E-01 | 9,61E-01 |
| <i>AK000026</i>        | 1,00  | 8,96E-01 | 9,61E-01 |
| <i>BU783246</i>        | 1,00  | 8,96E-01 | 9,61E-01 |
| <i>TSG101</i>          | 1,00  | 8,96E-01 | 9,61E-01 |
| <i>SIGLEC10</i>        | 1,00  | 8,96E-01 | 9,61E-01 |
| <i>MRPL41</i>          | 1,00  | 8,96E-01 | 9,61E-01 |
| <i>SPP2</i>            | 1,01  | 8,96E-01 | 9,61E-01 |
| <i>A_24_P931264</i>    | 1,01  | 8,97E-01 | 9,61E-01 |
| <i>A_23_P1894</i>      | 1,01  | 8,96E-01 | 9,61E-01 |
| <i>BE703462</i>        | 1,01  | 8,96E-01 | 9,61E-01 |
| <i>A_24_P613108</i>    | 1,01  | 8,96E-01 | 9,61E-01 |
| <i>37500</i>           | 1,01  | 8,96E-01 | 9,61E-01 |
| <i>A_24_P945375</i>    | 1,01  | 8,96E-01 | 9,61E-01 |
| <i>BAHCC1</i>          | 1,01  | 8,96E-01 | 9,61E-01 |
| <i>NT5DC2</i>          | 1,01  | 8,96E-01 | 9,61E-01 |
| <i>SMN1</i>            | 1,01  | 8,96E-01 | 9,61E-01 |
| <i>A_24_P135771</i>    | 1,01  | 8,97E-01 | 9,61E-01 |
| <i>THC2268216</i>      | 1,02  | 8,96E-01 | 9,61E-01 |
| <i>EIF5B</i>           | 1,06  | 8,96E-01 | 9,61E-01 |
| <i>PECR</i>            | -1,01 | 8,97E-01 | 9,61E-01 |
| <i>THC2310298</i>      | -1,01 | 8,97E-01 | 9,61E-01 |
| <i>C9orf127</i>        | -1,00 | 8,97E-01 | 9,61E-01 |
| <i>TMEM113</i>         | -1,00 | 8,97E-01 | 9,61E-01 |
| <i>ZNF645</i>          | 1,00  | 8,97E-01 | 9,61E-01 |
| <i>C16orf72</i>        | 1,00  | 8,97E-01 | 9,61E-01 |
| <i>ENST00000379870</i> | 1,00  | 8,97E-01 | 9,61E-01 |

|                        |       |          |          |
|------------------------|-------|----------|----------|
| <i>NALP4</i>           | 1,01  | 8,97E-01 | 9,61E-01 |
| <i>GSCL</i>            | 1,01  | 8,97E-01 | 9,61E-01 |
| <i>SPZ1</i>            | -1,00 | 8,97E-01 | 9,61E-01 |
| <i>C14orf92</i>        | 1,01  | 8,97E-01 | 9,61E-01 |
| <i>KCNG3</i>           | -1,00 | 8,97E-01 | 9,62E-01 |
| <i>LCT</i>             | -1,01 | 8,97E-01 | 9,62E-01 |
| <i>ZNF219</i>          | -1,01 | 8,98E-01 | 9,62E-01 |
| <i>KCNK12</i>          | -1,01 | 8,98E-01 | 9,62E-01 |
| <i>A_24_P290348</i>    | -1,00 | 8,98E-01 | 9,62E-01 |
| <i>NP297856</i>        | 1,00  | 8,98E-01 | 9,62E-01 |
| <i>NPR3</i>            | -1,01 | 8,98E-01 | 9,62E-01 |
| <i>OS9</i>             | -1,01 | 8,98E-01 | 9,62E-01 |
| <i>THC2447383</i>      | -1,01 | 8,98E-01 | 9,62E-01 |
| <i>PCP2</i>            | -1,00 | 8,98E-01 | 9,62E-01 |
| <i>GSG1</i>            | 1,00  | 8,98E-01 | 9,62E-01 |
| <i>ENST00000359449</i> | 1,01  | 8,98E-01 | 9,62E-01 |
| <i>DIRC1</i>           | 1,02  | 8,98E-01 | 9,62E-01 |
| <i>NRG1</i>            | -1,02 | 8,98E-01 | 9,62E-01 |
| <i>LRFN3</i>           | 1,01  | 8,98E-01 | 9,62E-01 |
| <i>IGFL2</i>           | 1,01  | 8,98E-01 | 9,62E-01 |
| <i>THC2359128</i>      | -1,01 | 8,98E-01 | 9,62E-01 |
| <i>CENTB2</i>          | 1,00  | 8,98E-01 | 9,62E-01 |
| <i>A_32_P69653</i>     | 1,01  | 8,98E-01 | 9,62E-01 |
| <i>ZDHHC9</i>          | -1,01 | 8,98E-01 | 9,62E-01 |
| <i>ZNF713</i>          | 1,01  | 8,98E-01 | 9,62E-01 |
| <i>ZIC2</i>            | -1,00 | 8,98E-01 | 9,62E-01 |
| <i>MBOAT5</i>          | 1,01  | 8,98E-01 | 9,62E-01 |
| <i>A_23_P370707</i>    | 1,01  | 8,98E-01 | 9,62E-01 |
| <i>AA835868</i>        | 1,01  | 8,99E-01 | 9,62E-01 |
| <i>CREBL1</i>          | -1,00 | 8,99E-01 | 9,62E-01 |
| <i>SENP6</i>           | 1,00  | 8,99E-01 | 9,62E-01 |
| <i>A_24_P349580</i>    | 1,01  | 8,99E-01 | 9,62E-01 |
| <i>TEKT1</i>           | -1,01 | 8,99E-01 | 9,62E-01 |
| <i>HLA-E</i>           | 1,00  | 8,99E-01 | 9,62E-01 |
| <i>C20orf141</i>       | 1,01  | 8,99E-01 | 9,62E-01 |
| <i>IMPG1</i>           | 1,01  | 8,99E-01 | 9,62E-01 |
| <i>LRAT</i>            | 1,00  | 8,99E-01 | 9,62E-01 |
| <i>RDHE2</i>           | -1,01 | 8,99E-01 | 9,62E-01 |
| <i>FGF6</i>            | -1,01 | 8,99E-01 | 9,62E-01 |
| <i>BC001879</i>        | -1,00 | 8,99E-01 | 9,62E-01 |
| <i>COMMD9</i>          | 1,00  | 8,99E-01 | 9,62E-01 |
| <i>FLJ39582</i>        | 1,00  | 8,99E-01 | 9,62E-01 |
| <i>THC2334732</i>      | 1,00  | 8,99E-01 | 9,62E-01 |
| <i>A_24_P178654</i>    | 1,01  | 8,99E-01 | 9,62E-01 |

|                        |       |          |          |
|------------------------|-------|----------|----------|
| <i>KIAA1530</i>        | 1,01  | 8,99E-01 | 9,62E-01 |
| <i>ETG04_27747</i>     | 1,00  | 8,99E-01 | 9,62E-01 |
| <i>AF234262</i>        | -1,01 | 8,99E-01 | 9,62E-01 |
| <i>ENST00000354586</i> | 1,01  | 8,99E-01 | 9,62E-01 |
| <i>EPB41L4B</i>        | -1,01 | 9,00E-01 | 9,63E-01 |
| <i>CAMK1</i>           | 1,00  | 9,00E-01 | 9,63E-01 |
| <i>CASC3</i>           | 1,01  | 9,00E-01 | 9,63E-01 |
| <i>MDM1</i>            | -1,01 | 9,00E-01 | 9,63E-01 |
| <i>ENST00000334564</i> | -1,01 | 9,00E-01 | 9,63E-01 |
| <i>JSRP1</i>           | 1,01  | 9,00E-01 | 9,63E-01 |
| <i>GNPAT</i>           | -1,01 | 9,00E-01 | 9,63E-01 |
| <i>A_24_P418536</i>    | -1,03 | 9,00E-01 | 9,63E-01 |
| <i>A_32_P65371</i>     | 1,01  | 9,00E-01 | 9,63E-01 |
| <i>ZNF541</i>          | -1,01 | 9,00E-01 | 9,63E-01 |
| <i>AQP9</i>            | 1,02  | 9,00E-01 | 9,63E-01 |
| <i>TTC12</i>           | 1,01  | 9,01E-01 | 9,63E-01 |
| <i>AA478981</i>        | -1,01 | 9,01E-01 | 9,63E-01 |
| <i>AK022165</i>        | -1,01 | 9,01E-01 | 9,63E-01 |
| <i>THC2348230</i>      | 1,01  | 9,01E-01 | 9,63E-01 |
| <i>A_24_P390974</i>    | 1,00  | 9,01E-01 | 9,63E-01 |
| <i>C8orf73</i>         | -1,01 | 9,01E-01 | 9,63E-01 |
| <i>CR621132</i>        | -1,00 | 9,01E-01 | 9,63E-01 |
| <i>C7orf28B</i>        | -1,00 | 9,01E-01 | 9,63E-01 |
| <i>ENST00000378252</i> | -1,00 | 9,01E-01 | 9,63E-01 |
| <i>GPATC3</i>          | 1,00  | 9,01E-01 | 9,63E-01 |
| <i>PIGX</i>            | 1,00  | 9,01E-01 | 9,63E-01 |
| <i>HIST1H4L</i>        | 1,01  | 9,01E-01 | 9,63E-01 |
| <i>A_32_P190944</i>    | 1,01  | 9,01E-01 | 9,63E-01 |
| <i>VNN2</i>            | 1,02  | 9,01E-01 | 9,63E-01 |
| <i>NDUFC1</i>          | -1,01 | 9,01E-01 | 9,63E-01 |
| <i>ENST00000338302</i> | 1,01  | 9,01E-01 | 9,63E-01 |
| <i>OAS3</i>            | 1,01  | 9,01E-01 | 9,63E-01 |
| <i>DAK</i>             | 1,00  | 9,01E-01 | 9,63E-01 |
| <i>A_23_P247</i>       | -1,07 | 9,02E-01 | 9,63E-01 |
| <i>LIX1</i>            | -1,02 | 9,02E-01 | 9,63E-01 |
| <i>ENST00000297812</i> | -1,01 | 9,02E-01 | 9,63E-01 |
| <i>FLJ32871</i>        | 1,00  | 9,02E-01 | 9,64E-01 |
| <i>TFAP2C</i>          | -1,02 | 9,02E-01 | 9,64E-01 |
| <i>THC2433340</i>      | -1,01 | 9,02E-01 | 9,64E-01 |
| <i>ENST00000378348</i> | -1,01 | 9,02E-01 | 9,64E-01 |
| <i>IFITM4P</i>         | -1,01 | 9,02E-01 | 9,64E-01 |
| <i>BRS3</i>            | -1,00 | 9,02E-01 | 9,64E-01 |
| <i>C12orf10</i>        | -1,00 | 9,02E-01 | 9,64E-01 |
| <i>C12orf63</i>        | -1,00 | 9,02E-01 | 9,64E-01 |

|                        |       |          |          |
|------------------------|-------|----------|----------|
| <i>A_24_P161184</i>    | -1,00 | 9,02E-01 | 9,64E-01 |
| <i>A_32_P36412</i>     | -1,00 | 9,02E-01 | 9,64E-01 |
| <i>EMID2</i>           | -1,00 | 9,02E-01 | 9,64E-01 |
| <i>NIP30</i>           | -1,00 | 9,02E-01 | 9,64E-01 |
| <i>FAM44C</i>          | 1,00  | 9,02E-01 | 9,64E-01 |
| <i>THC2406514</i>      | 1,00  | 9,02E-01 | 9,64E-01 |
| <i>THC2412117</i>      | 1,00  | 9,02E-01 | 9,64E-01 |
| <i>HCG3</i>            | 1,00  | 9,02E-01 | 9,64E-01 |
| <i>FAM78B</i>          | 1,00  | 9,02E-01 | 9,64E-01 |
| <i>THC2339402</i>      | 1,00  | 9,02E-01 | 9,64E-01 |
| <i>A_24_P15702</i>     | 1,00  | 9,02E-01 | 9,64E-01 |
| <i>VCX2</i>            | 1,00  | 9,02E-01 | 9,64E-01 |
| <i>ME1</i>             | 1,01  | 9,02E-01 | 9,64E-01 |
| <i>A_24_P315581</i>    | 1,01  | 9,02E-01 | 9,64E-01 |
| <i>PLAG1</i>           | 1,01  | 9,02E-01 | 9,64E-01 |
| <i>A_24_P936849</i>    | -1,01 | 9,03E-01 | 9,64E-01 |
| <i>AI950749</i>        | -1,01 | 9,03E-01 | 9,64E-01 |
| <i>A_24_P84198</i>     | 1,00  | 9,03E-01 | 9,64E-01 |
| <i>A_24_P247464</i>    | 1,01  | 9,03E-01 | 9,64E-01 |
| <i>ADORA1</i>          | 1,01  | 9,03E-01 | 9,64E-01 |
| <i>ABCA1</i>           | -1,02 | 9,03E-01 | 9,64E-01 |
| <i>FLJ46419</i>        | -1,01 | 9,03E-01 | 9,64E-01 |
| <i>ENST00000373748</i> | -1,00 | 9,03E-01 | 9,64E-01 |
| <i>A_23_P135589</i>    | -1,00 | 9,03E-01 | 9,64E-01 |
| <i>FOXR1</i>           | 1,01  | 9,03E-01 | 9,64E-01 |
| <i>C10orf90</i>        | 1,01  | 9,03E-01 | 9,64E-01 |
| <i>CYP2U1</i>          | 1,01  | 9,03E-01 | 9,64E-01 |
| <i>EPB41L2</i>         | -1,01 | 9,03E-01 | 9,64E-01 |
| <i>AK025363</i>        | -1,01 | 9,03E-01 | 9,64E-01 |
| <i>NUP210L</i>         | -1,01 | 9,03E-01 | 9,64E-01 |
| <i>DSG3</i>            | -1,04 | 9,03E-01 | 9,64E-01 |
| <i>FLJ44060</i>        | -1,01 | 9,03E-01 | 9,64E-01 |
| <i>IFT20</i>           | -1,01 | 9,03E-01 | 9,64E-01 |
| <i>BX118161</i>        | -1,00 | 9,03E-01 | 9,64E-01 |
| <i>FAM14A</i>          | 1,01  | 9,03E-01 | 9,64E-01 |
| <i>BX090520</i>        | 1,02  | 9,03E-01 | 9,64E-01 |
| <i>NPEPL1</i>          | -1,00 | 9,04E-01 | 9,64E-01 |
| <i>ZBTB7C</i>          | 1,00  | 9,03E-01 | 9,64E-01 |
| <i>SLC22A1</i>         | 1,01  | 9,04E-01 | 9,64E-01 |
| <i>A_24_P923654</i>    | 1,01  | 9,03E-01 | 9,64E-01 |
| <i>A_23_P125016</i>    | 1,01  | 9,03E-01 | 9,64E-01 |
| <i>C22orf13</i>        | -1,00 | 9,04E-01 | 9,64E-01 |
| <i>XK</i>              | -1,01 | 9,04E-01 | 9,64E-01 |
| <i>ACRV1</i>           | -1,00 | 9,04E-01 | 9,64E-01 |

|                        |       |          |          |
|------------------------|-------|----------|----------|
| <i>AK000995</i>        | 1,01  | 9,04E-01 | 9,64E-01 |
| <i>PHF12</i>           | 1,01  | 9,04E-01 | 9,64E-01 |
| <i>ERO1L</i>           | 1,01  | 9,04E-01 | 9,64E-01 |
| <i>ENST00000383490</i> | 1,00  | 9,04E-01 | 9,64E-01 |
| <i>A_32_P24338</i>     | 1,01  | 9,04E-01 | 9,64E-01 |
| <i>CXorf21</i>         | 1,01  | 9,04E-01 | 9,64E-01 |
| <i>LOC644850</i>       | -1,00 | 9,04E-01 | 9,64E-01 |
| <i>A_24_P935829</i>    | -1,00 | 9,04E-01 | 9,64E-01 |
| <i>THC2266672</i>      | -1,03 | 9,04E-01 | 9,64E-01 |
| <i>A_24_P52168</i>     | -1,01 | 9,06E-01 | 9,64E-01 |
| <i>THC2398077</i>      | -1,01 | 9,05E-01 | 9,64E-01 |
| <i>A_32_P212712</i>    | -1,01 | 9,06E-01 | 9,64E-01 |
| <i>MYBL1</i>           | -1,01 | 9,05E-01 | 9,64E-01 |
| <i>ENST00000378969</i> | -1,01 | 9,05E-01 | 9,64E-01 |
| <i>SERPING1</i>        | -1,01 | 9,05E-01 | 9,64E-01 |
| <i>OR56B1</i>          | -1,01 | 9,05E-01 | 9,64E-01 |
| <i>VMD2L2</i>          | -1,01 | 9,05E-01 | 9,64E-01 |
| <i>A_32_P119949</i>    | -1,01 | 9,05E-01 | 9,64E-01 |
| <i>NBPF14</i>          | -1,01 | 9,04E-01 | 9,64E-01 |
| <i>RC12</i>            | -1,01 | 9,05E-01 | 9,64E-01 |
| <i>RBX1</i>            | -1,01 | 9,04E-01 | 9,64E-01 |
| <i>CHI3L1</i>          | -1,01 | 9,05E-01 | 9,64E-01 |
| <i>C11orf65</i>        | -1,01 | 9,05E-01 | 9,64E-01 |
| <i>NP214542</i>        | -1,01 | 9,05E-01 | 9,64E-01 |
| <i>CYP26A1</i>         | -1,00 | 9,05E-01 | 9,64E-01 |
| <i>BQ774797</i>        | -1,00 | 9,05E-01 | 9,64E-01 |
| <i>USP14</i>           | -1,00 | 9,06E-01 | 9,64E-01 |
| <i>AF086214</i>        | -1,00 | 9,05E-01 | 9,64E-01 |
| <i>PRKAR1A</i>         | -1,00 | 9,04E-01 | 9,64E-01 |
| <i>FGF5</i>            | 1,00  | 9,05E-01 | 9,64E-01 |
| <i>ZMAT5</i>           | 1,00  | 9,05E-01 | 9,64E-01 |
| <i>THC2440942</i>      | 1,00  | 9,05E-01 | 9,64E-01 |
| <i>LOC645323</i>       | 1,00  | 9,05E-01 | 9,64E-01 |
| <i>KPNB1</i>           | 1,00  | 9,05E-01 | 9,64E-01 |
| <i>DNASE2B</i>         | 1,00  | 9,05E-01 | 9,64E-01 |
| <i>GTF2A2</i>          | 1,00  | 9,06E-01 | 9,64E-01 |
| <i>STARD3NL</i>        | 1,00  | 9,06E-01 | 9,64E-01 |
| <i>AY358788</i>        | 1,00  | 9,05E-01 | 9,64E-01 |
| <i>COX10</i>           | 1,00  | 9,05E-01 | 9,64E-01 |
| <i>FRMPD4</i>          | 1,01  | 9,05E-01 | 9,64E-01 |
| <i>CR749704</i>        | 1,01  | 9,04E-01 | 9,64E-01 |
| <i>ENST00000360548</i> | 1,01  | 9,05E-01 | 9,64E-01 |
| <i>PIK3CD</i>          | 1,01  | 9,05E-01 | 9,64E-01 |
| <i>A_24_P101503</i>    | 1,01  | 9,05E-01 | 9,64E-01 |



|                        |       |          |          |
|------------------------|-------|----------|----------|
| <i>UNC45B</i>          | 1,01  | 9,06E-01 | 9,64E-01 |
| <i>SPHAR</i>           | 1,01  | 9,05E-01 | 9,64E-01 |
| <i>A_24_P846810</i>    | 1,01  | 9,05E-01 | 9,64E-01 |
| <i>A_24_P375405</i>    | 1,01  | 9,05E-01 | 9,64E-01 |
| <i>THC2342793</i>      | 1,01  | 9,05E-01 | 9,64E-01 |
| <i>A_24_P392271</i>    | 1,01  | 9,05E-01 | 9,64E-01 |
| <i>THC2266506</i>      | 1,01  | 9,05E-01 | 9,64E-01 |
| <i>SLC2A5</i>          | 1,02  | 9,05E-01 | 9,64E-01 |
| <i>LOC401778</i>       | 1,03  | 9,05E-01 | 9,64E-01 |
| <i>STARD5</i>          | -1,01 | 9,06E-01 | 9,64E-01 |
| <i>BE835490</i>        | -1,00 | 9,06E-01 | 9,64E-01 |
| <i>ENST00000332148</i> | 1,01  | 9,06E-01 | 9,64E-01 |
| <i>A_24_P118411</i>    | 1,01  | 9,06E-01 | 9,64E-01 |
| <i>POLN</i>            | -1,00 | 9,06E-01 | 9,64E-01 |
| <i>A_24_P341078</i>    | -1,02 | 9,06E-01 | 9,64E-01 |
| <i>CTAGE4</i>          | -1,00 | 9,06E-01 | 9,65E-01 |
| <i>FAM26C</i>          | 1,00  | 9,06E-01 | 9,65E-01 |
| <i>CN277024</i>        | 1,01  | 9,06E-01 | 9,65E-01 |
| <i>AK129724</i>        | -1,01 | 9,06E-01 | 9,65E-01 |
| <i>FLJ25791</i>        | -1,00 | 9,06E-01 | 9,65E-01 |
| <i>ACBD6</i>           | 1,00  | 9,06E-01 | 9,65E-01 |
| <i>BQ432543</i>        | 1,00  | 9,06E-01 | 9,65E-01 |
| <i>POLE3</i>           | -1,00 | 9,06E-01 | 9,65E-01 |
| <i>A_32_P166653</i>    | -1,02 | 9,06E-01 | 9,65E-01 |
| <i>A_24_P915294</i>    | 1,00  | 9,06E-01 | 9,65E-01 |
| <i>GON4L</i>           | 1,00  | 9,06E-01 | 9,65E-01 |
| <i>IGFBP7</i>          | 1,01  | 9,07E-01 | 9,65E-01 |
| <i>DRD3</i>            | 1,00  | 9,07E-01 | 9,65E-01 |
| <i>LOC339260</i>       | 1,00  | 9,07E-01 | 9,65E-01 |
| <i>WBP5</i>            | -1,01 | 9,07E-01 | 9,65E-01 |
| <i>NSDHL</i>           | -1,01 | 9,07E-01 | 9,65E-01 |
| <i>CYP2C18</i>         | -1,02 | 9,07E-01 | 9,65E-01 |
| <i>ACHE</i>            | -1,01 | 9,07E-01 | 9,65E-01 |
| <i>HBZ</i>             | 1,01  | 9,07E-01 | 9,65E-01 |
| <i>OSR2</i>            | -1,01 | 9,07E-01 | 9,65E-01 |
| <i>LOC401876</i>       | -1,00 | 9,07E-01 | 9,65E-01 |
| <i>TCEA2</i>           | -1,01 | 9,07E-01 | 9,65E-01 |
| <i>THC2315566</i>      | -1,00 | 9,07E-01 | 9,65E-01 |
| <i>LOC388335</i>       | 1,00  | 9,07E-01 | 9,65E-01 |
| <i>BX339253</i>        | -1,00 | 9,07E-01 | 9,65E-01 |
| <i>RBM15B</i>          | 1,00  | 9,07E-01 | 9,65E-01 |
| <i>RQCD1</i>           | 1,00  | 9,07E-01 | 9,65E-01 |
| <i>C6orf51</i>         | 1,01  | 9,07E-01 | 9,65E-01 |
| <i>EBP</i>             | 1,01  | 9,07E-01 | 9,65E-01 |

|                        |       |          |          |
|------------------------|-------|----------|----------|
| <i>RAB9P1</i>          | 1,01  | 9,07E-01 | 9,65E-01 |
| <i>ENST00000327804</i> | 1,00  | 9,08E-01 | 9,65E-01 |
| <i>A_24_P553610</i>    | -1,00 | 9,08E-01 | 9,65E-01 |
| <i>A_24_P850069</i>    | 1,00  | 9,08E-01 | 9,65E-01 |
| <i>TFB1M</i>           | -1,00 | 9,08E-01 | 9,65E-01 |
| <i>A_24_P7380</i>      | 1,01  | 9,08E-01 | 9,66E-01 |
| <i>THC2281350</i>      | -1,01 | 9,08E-01 | 9,66E-01 |
| <i>FLJ20097</i>        | -1,00 | 9,08E-01 | 9,66E-01 |
| <i>C1orf168</i>        | -1,01 | 9,08E-01 | 9,66E-01 |
| <i>AK097351</i>        | -1,00 | 9,08E-01 | 9,66E-01 |
| <i>THC2281305</i>      | 1,00  | 9,08E-01 | 9,66E-01 |
| <i>ENST00000358081</i> | 1,02  | 9,08E-01 | 9,66E-01 |
| <i>RP11-5G9.1</i>      | 1,01  | 9,08E-01 | 9,66E-01 |
| <i>CD370114</i>        | -1,01 | 9,09E-01 | 9,66E-01 |
| <i>AL713623</i>        | 1,01  | 9,09E-01 | 9,66E-01 |
| <i>A_24_P315326</i>    | -1,01 | 9,09E-01 | 9,66E-01 |
| <i>THC2341371</i>      | -1,01 | 9,09E-01 | 9,66E-01 |
| <i>FLJ36180</i>        | 1,00  | 9,09E-01 | 9,66E-01 |
| <i>THC2316748</i>      | -1,02 | 9,09E-01 | 9,66E-01 |
| <i>AB032526</i>        | -1,00 | 9,09E-01 | 9,66E-01 |
| <i>A_24_P307184</i>    | 1,01  | 9,09E-01 | 9,66E-01 |
| <i>CLTA</i>            | 1,00  | 9,09E-01 | 9,66E-01 |
| <i>THC2343253</i>      | -1,01 | 9,09E-01 | 9,66E-01 |
| <i>DEFB123</i>         | -1,02 | 9,09E-01 | 9,66E-01 |
| <i>CR613436</i>        | -1,01 | 9,09E-01 | 9,66E-01 |
| <i>PNLIPRP1</i>        | -1,00 | 9,09E-01 | 9,66E-01 |
| <i>KCTD3</i>           | 1,01  | 9,10E-01 | 9,66E-01 |
| <i>IFNGR1</i>          | 1,01  | 9,10E-01 | 9,66E-01 |
| <i>AF231918</i>        | 1,00  | 9,10E-01 | 9,67E-01 |
| <i>CCDC15</i>          | 1,01  | 9,10E-01 | 9,67E-01 |
| <i>CKMT1B</i>          | 1,02  | 9,10E-01 | 9,67E-01 |
| <i>A_24_P247175</i>    | 1,02  | 9,10E-01 | 9,67E-01 |
| <i>BC042064</i>        | 1,00  | 9,10E-01 | 9,67E-01 |
| <i>BX115782</i>        | 1,00  | 9,10E-01 | 9,67E-01 |
| <i>A_24_P323916</i>    | 1,00  | 9,10E-01 | 9,67E-01 |
| <i>A_24_P118813</i>    | 1,01  | 9,10E-01 | 9,67E-01 |
| <i>AK026750</i>        | 1,02  | 9,10E-01 | 9,67E-01 |
| <i>EI24</i>            | 1,00  | 9,10E-01 | 9,67E-01 |
| <i>A_24_P477353</i>    | -1,01 | 9,10E-01 | 9,67E-01 |
| <i>TNFSF7</i>          | -1,01 | 9,10E-01 | 9,67E-01 |
| <i>LGALS3BP</i>        | -1,01 | 9,10E-01 | 9,67E-01 |
| <i>LRSAM1</i>          | -1,00 | 9,10E-01 | 9,67E-01 |
| <i>ENST00000361565</i> | 1,00  | 9,10E-01 | 9,67E-01 |
| <i>SERTAD4</i>         | 1,01  | 9,10E-01 | 9,67E-01 |

|                        |       |          |          |
|------------------------|-------|----------|----------|
| <i>A_23_P132197</i>    | -1,03 | 9,11E-01 | 9,67E-01 |
| <i>LOC644246</i>       | -1,02 | 9,11E-01 | 9,67E-01 |
| <i>ILF2</i>            | -1,00 | 9,11E-01 | 9,67E-01 |
| <i>A_24_P654255</i>    | 1,00  | 9,11E-01 | 9,67E-01 |
| <i>A_24_P375076</i>    | 1,00  | 9,11E-01 | 9,67E-01 |
| <i>RY1</i>             | 1,00  | 9,11E-01 | 9,67E-01 |
| <i>C1orf62</i>         | 1,00  | 9,11E-01 | 9,67E-01 |
| <i>RBMV1B</i>          | 1,00  | 9,11E-01 | 9,67E-01 |
| <i>OSTM1</i>           | 1,00  | 9,11E-01 | 9,67E-01 |
| <i>WNK2</i>            | -1,01 | 9,11E-01 | 9,67E-01 |
| <i>AF242507</i>        | -1,00 | 9,11E-01 | 9,67E-01 |
| <i>LOC401577</i>       | -1,01 | 9,11E-01 | 9,67E-01 |
| <i>GALNT1</i>          | -1,01 | 9,11E-01 | 9,67E-01 |
| <i>A_32_P131449</i>    | 1,01  | 9,11E-01 | 9,67E-01 |
| <i>TBX15</i>           | 1,01  | 9,11E-01 | 9,67E-01 |
| <i>AK055647</i>        | -1,02 | 9,12E-01 | 9,67E-01 |
| <i>LOC388796</i>       | -1,01 | 9,12E-01 | 9,67E-01 |
| <i>ENST00000262494</i> | -1,01 | 9,12E-01 | 9,67E-01 |
| <i>FKBP14</i>          | -1,01 | 9,11E-01 | 9,67E-01 |
| <i>ENST00000308989</i> | -1,01 | 9,12E-01 | 9,67E-01 |
| <i>ARHGAP20</i>        | -1,01 | 9,12E-01 | 9,67E-01 |
| <i>DMRT2</i>           | -1,01 | 9,12E-01 | 9,67E-01 |
| <i>PAK1</i>            | -1,01 | 9,12E-01 | 9,67E-01 |
| <i>VSIG9</i>           | -1,01 | 9,12E-01 | 9,67E-01 |
| <i>HSD17B1</i>         | -1,01 | 9,13E-01 | 9,67E-01 |
| <i>A_24_P401670</i>    | -1,01 | 9,12E-01 | 9,67E-01 |
| <i>BQ447829</i>        | -1,01 | 9,12E-01 | 9,67E-01 |
| <i>SMG1</i>            | -1,01 | 9,12E-01 | 9,67E-01 |
| <i>A_24_P93162</i>     | -1,00 | 9,12E-01 | 9,67E-01 |
| <i>A_24_P135921</i>    | -1,00 | 9,11E-01 | 9,67E-01 |
| <i>TMEM146</i>         | -1,00 | 9,12E-01 | 9,67E-01 |
| <i>LOC643837</i>       | -1,00 | 9,11E-01 | 9,67E-01 |
| <i>SLC7A14</i>         | -1,00 | 9,12E-01 | 9,67E-01 |
| <i>NIT1</i>            | 1,00  | 9,12E-01 | 9,67E-01 |
| <i>KCNH6</i>           | 1,00  | 9,12E-01 | 9,67E-01 |
| <i>AI821658</i>        | 1,00  | 9,13E-01 | 9,67E-01 |
| <i>A_24_P639321</i>    | 1,00  | 9,12E-01 | 9,67E-01 |
| <i>FLJ21839</i>        | 1,00  | 9,13E-01 | 9,67E-01 |
| <i>INVS</i>            | 1,00  | 9,13E-01 | 9,67E-01 |
| <i>AK096984</i>        | 1,00  | 9,12E-01 | 9,67E-01 |
| <i>PRO0471</i>         | 1,00  | 9,12E-01 | 9,67E-01 |
| <i>THC2343771</i>      | 1,00  | 9,12E-01 | 9,67E-01 |
| <i>HIST1H2BB</i>       | 1,00  | 9,12E-01 | 9,67E-01 |
| <i>HMOX2</i>           | 1,00  | 9,12E-01 | 9,67E-01 |

|                        |       |          |          |
|------------------------|-------|----------|----------|
| <i>MRPL45</i>          | 1,00  | 9,12E-01 | 9,67E-01 |
| <i>A_32_P151087</i>    | 1,00  | 9,12E-01 | 9,67E-01 |
| <i>AF118081</i>        | 1,01  | 9,13E-01 | 9,67E-01 |
| <i>C11orf52</i>        | 1,01  | 9,12E-01 | 9,67E-01 |
| <i>ENST00000371386</i> | 1,01  | 9,13E-01 | 9,67E-01 |
| <i>AUTS2</i>           | 1,01  | 9,12E-01 | 9,67E-01 |
| <i>MGC72104</i>        | 1,01  | 9,12E-01 | 9,67E-01 |
| <i>CCL26</i>           | 1,01  | 9,12E-01 | 9,67E-01 |
| <i>KY</i>              | 1,01  | 9,12E-01 | 9,67E-01 |
| <i>IL8RB</i>           | 1,01  | 9,13E-01 | 9,67E-01 |
| <i>A_32_P150269</i>    | 1,01  | 9,12E-01 | 9,67E-01 |
| <i>KRTAP5-8</i>        | 1,02  | 9,12E-01 | 9,67E-01 |
| <i>TSPAN15</i>         | 1,02  | 9,11E-01 | 9,67E-01 |
| <i>WFDC1</i>           | 1,02  | 9,12E-01 | 9,67E-01 |
| <i>KRT6E</i>           | 1,06  | 9,12E-01 | 9,67E-01 |
| <i>IL8RBP</i>          | -1,01 | 9,13E-01 | 9,67E-01 |
| <i>A_24_P767972</i>    | -1,01 | 9,13E-01 | 9,67E-01 |
| <i>GNB2L1</i>          | -1,01 | 9,13E-01 | 9,67E-01 |
| <i>C3orf26</i>         | -1,00 | 9,13E-01 | 9,67E-01 |
| <i>AI761615</i>        | -1,00 | 9,13E-01 | 9,67E-01 |
| <i>MTMR3</i>           | -1,00 | 9,13E-01 | 9,67E-01 |
| <i>CACNG4</i>          | 1,01  | 9,13E-01 | 9,67E-01 |
| <i>THC2455550</i>      | -1,01 | 9,13E-01 | 9,67E-01 |
| <i>AK056624</i>        | -1,01 | 9,13E-01 | 9,67E-01 |
| <i>A_24_P409521</i>    | -1,01 | 9,13E-01 | 9,67E-01 |
| <i>AF119872</i>        | -1,00 | 9,13E-01 | 9,67E-01 |
| <i>WDR51A</i>          | 1,00  | 9,13E-01 | 9,67E-01 |
| <i>MRPL52</i>          | 1,01  | 9,13E-01 | 9,67E-01 |
| <i>SOX5</i>            | 1,01  | 9,13E-01 | 9,67E-01 |
| <i>GALNAC4S-6ST</i>    | 1,01  | 9,13E-01 | 9,67E-01 |
| <i>AK124281</i>        | 1,01  | 9,13E-01 | 9,67E-01 |
| <i>LGI3</i>            | -1,01 | 9,14E-01 | 9,68E-01 |
| <i>A_24_P101771</i>    | 1,01  | 9,14E-01 | 9,68E-01 |
| <i>EFEMP2</i>          | -1,01 | 9,14E-01 | 9,68E-01 |
| <i>AF419291</i>        | -1,00 | 9,14E-01 | 9,68E-01 |
| <i>BQ716254</i>        | 1,02  | 9,14E-01 | 9,68E-01 |
| <i>CDH20</i>           | 1,00  | 9,14E-01 | 9,68E-01 |
| <i>ITPR3</i>           | -1,01 | 9,14E-01 | 9,68E-01 |
| <i>BX109759</i>        | 1,00  | 9,14E-01 | 9,68E-01 |
| <i>LOC649290</i>       | 1,00  | 9,14E-01 | 9,68E-01 |
| <i>GPX3</i>            | 1,01  | 9,14E-01 | 9,68E-01 |
| <i>A_24_P626812</i>    | 1,00  | 9,14E-01 | 9,68E-01 |
| <i>LOC646999</i>       | 1,00  | 9,14E-01 | 9,68E-01 |
| <i>THC2430065</i>      | 1,00  | 9,14E-01 | 9,68E-01 |

|                        |       |          |          |
|------------------------|-------|----------|----------|
| <i>GREM2</i>           | 1,01  | 9,14E-01 | 9,68E-01 |
| <i>X90840</i>          | 1,00  | 9,15E-01 | 9,68E-01 |
| <i>RP11-49G10.8</i>    | 1,00  | 9,15E-01 | 9,68E-01 |
| <i>CALCR</i>           | 1,00  | 9,15E-01 | 9,68E-01 |
| <i>A_24_P289753</i>    | 1,01  | 9,15E-01 | 9,68E-01 |
| <i>KAZALD1</i>         | 1,02  | 9,15E-01 | 9,68E-01 |
| <i>A_24_P807445</i>    | -1,02 | 9,15E-01 | 9,68E-01 |
| <i>ENST00000265986</i> | -1,01 | 9,15E-01 | 9,68E-01 |
| <i>DRD1</i>            | -1,00 | 9,15E-01 | 9,68E-01 |
| <i>FLJ35424</i>        | -1,00 | 9,15E-01 | 9,68E-01 |
| <i>CAMK2B</i>          | 1,00  | 9,15E-01 | 9,68E-01 |
| <i>WNT4</i>            | 1,01  | 9,15E-01 | 9,68E-01 |
| <i>MRFAP1</i>          | 1,00  | 9,15E-01 | 9,68E-01 |
| <i>THC2397460</i>      | 1,00  | 9,15E-01 | 9,68E-01 |
| <i>FTCD</i>            | 1,01  | 9,15E-01 | 9,68E-01 |
| <i>A_24_P940845</i>    | 1,00  | 9,15E-01 | 9,69E-01 |
| <i>SLC12A8</i>         | 1,00  | 9,15E-01 | 9,69E-01 |
| <i>AF113674</i>        | 1,01  | 9,15E-01 | 9,69E-01 |
| <i>RAB11B</i>          | 1,00  | 9,15E-01 | 9,69E-01 |
| <i>CSPG4</i>           | 1,02  | 9,15E-01 | 9,69E-01 |
| <i>FLJ14640</i>        | 1,00  | 9,15E-01 | 9,69E-01 |
| <i>ENST00000366769</i> | 1,01  | 9,16E-01 | 9,69E-01 |
| <i>THC2271804</i>      | 1,00  | 9,16E-01 | 9,69E-01 |
| <i>AK026368</i>        | -1,01 | 9,16E-01 | 9,69E-01 |
| <i>SLC1A6</i>          | 1,00  | 9,16E-01 | 9,69E-01 |
| <i>C16orf57</i>        | -1,00 | 9,16E-01 | 9,69E-01 |
| <i>SLC2A2</i>          | 1,00  | 9,16E-01 | 9,69E-01 |
| <i>GOT1</i>            | 1,00  | 9,16E-01 | 9,69E-01 |
| <i>IL8RA</i>           | 1,01  | 9,16E-01 | 9,69E-01 |
| <i>THC2290600</i>      | 1,01  | 9,16E-01 | 9,69E-01 |
| <i>ALOX15B</i>         | 1,01  | 9,16E-01 | 9,69E-01 |
| <i>AI401434</i>        | 1,01  | 9,16E-01 | 9,69E-01 |
| <i>PTK9L</i>           | 1,00  | 9,16E-01 | 9,69E-01 |
| <i>NP1166121</i>       | 1,01  | 9,16E-01 | 9,69E-01 |
| <i>SNN</i>             | 1,01  | 9,16E-01 | 9,69E-01 |
| <i>ENST00000357138</i> | -1,00 | 9,16E-01 | 9,69E-01 |
| <i>AK128099</i>        | 1,00  | 9,16E-01 | 9,69E-01 |
| <i>THC2378034</i>      | -1,01 | 9,17E-01 | 9,69E-01 |
| <i>AGPAT4</i>          | 1,00  | 9,16E-01 | 9,69E-01 |
| <i>SLITRK4</i>         | 1,02  | 9,16E-01 | 9,69E-01 |
| <i>U2AF1L1</i>         | 1,00  | 9,17E-01 | 9,69E-01 |
| <i>TPH1</i>            | 1,00  | 9,17E-01 | 9,69E-01 |
| <i>CENPM</i>           | -1,00 | 9,17E-01 | 9,69E-01 |
| <i>LOC91431</i>        | -1,00 | 9,17E-01 | 9,69E-01 |

|                        |       |          |          |
|------------------------|-------|----------|----------|
| <i>REXO1L1</i>         | -1,00 | 9,17E-01 | 9,69E-01 |
| <i>A_24_P850187</i>    | -1,03 | 9,17E-01 | 9,69E-01 |
| <i>KIAA0141</i>        | 1,00  | 9,17E-01 | 9,69E-01 |
| <i>MANBA</i>           | -1,01 | 9,18E-01 | 9,69E-01 |
| <i>NFIB</i>            | -1,01 | 9,17E-01 | 9,69E-01 |
| <i>SERPINA12</i>       | -1,00 | 9,17E-01 | 9,69E-01 |
| <i>SNRPN</i>           | -1,00 | 9,17E-01 | 9,69E-01 |
| <i>A_24_P770746</i>    | -1,00 | 9,17E-01 | 9,69E-01 |
| <i>C9orf121</i>        | 1,00  | 9,18E-01 | 9,69E-01 |
| <i>A_24_P944275</i>    | 1,00  | 9,17E-01 | 9,69E-01 |
| <i>RBM41</i>           | 1,00  | 9,18E-01 | 9,69E-01 |
| <i>BG721329</i>        | 1,01  | 9,17E-01 | 9,69E-01 |
| <i>B3GAT1</i>          | 1,01  | 9,17E-01 | 9,69E-01 |
| <i>THC2294587</i>      | 1,01  | 9,17E-01 | 9,69E-01 |
| <i>C1GALT1C1</i>       | 1,01  | 9,17E-01 | 9,69E-01 |
| <i>CR596712</i>        | 1,01  | 9,18E-01 | 9,69E-01 |
| <i>A_24_P187448</i>    | 1,01  | 9,17E-01 | 9,69E-01 |
| <i>HOXD1</i>           | -1,01 | 9,18E-01 | 9,70E-01 |
| <i>AY358246</i>        | -1,01 | 9,18E-01 | 9,70E-01 |
| <i>ENST00000359466</i> | -1,00 | 9,18E-01 | 9,70E-01 |
| <i>LOC255480</i>       | 1,00  | 9,18E-01 | 9,70E-01 |
| <i>GPATC1</i>          | 1,00  | 9,18E-01 | 9,70E-01 |
| <i>AK098660</i>        | 1,00  | 9,18E-01 | 9,70E-01 |
| <i>KIAA0495</i>        | 1,00  | 9,18E-01 | 9,70E-01 |
| <i>SNRPD3</i>          | 1,00  | 9,18E-01 | 9,70E-01 |
| <i>ZNF34</i>           | 1,00  | 9,18E-01 | 9,70E-01 |
| <i>AT_nC_5</i>         | 1,00  | 9,18E-01 | 9,70E-01 |
| <i>A_32_P127412</i>    | -1,00 | 9,18E-01 | 9,70E-01 |
| <i>HAX1</i>            | 1,00  | 9,18E-01 | 9,70E-01 |
| <i>THC2277837</i>      | -1,01 | 9,18E-01 | 9,70E-01 |
| <i>POLR2L</i>          | -1,01 | 9,18E-01 | 9,70E-01 |
| <i>BQ130537</i>        | -1,00 | 9,18E-01 | 9,70E-01 |
| <i>PAPOLB</i>          | 1,00  | 9,18E-01 | 9,70E-01 |
| <i>GSTZ1</i>           | -1,00 | 9,19E-01 | 9,70E-01 |
| <i>LOC645001</i>       | 1,01  | 9,19E-01 | 9,70E-01 |
| <i>LOC647066</i>       | -1,00 | 9,19E-01 | 9,70E-01 |
| <i>BC037911</i>        | -1,00 | 9,19E-01 | 9,70E-01 |
| <i>CALB2</i>           | -1,01 | 9,19E-01 | 9,70E-01 |
| <i>A_24_P272735</i>    | -1,02 | 9,19E-01 | 9,70E-01 |
| <i>FABP1</i>           | -1,01 | 9,19E-01 | 9,70E-01 |
| <i>MUCDHL</i>          | 1,00  | 9,19E-01 | 9,70E-01 |
| <i>PRY2</i>            | 1,00  | 9,19E-01 | 9,70E-01 |
| <i>A_24_P928119</i>    | 1,00  | 9,19E-01 | 9,70E-01 |
| <i>THC2412855</i>      | 1,00  | 9,19E-01 | 9,70E-01 |

|                        |       |          |          |
|------------------------|-------|----------|----------|
| <i>A_24_P517198</i>    | -1,01 | 9,20E-01 | 9,71E-01 |
| <i>LACTB</i>           | 1,00  | 9,20E-01 | 9,71E-01 |
| <i>HLA-DQB2</i>        | -1,01 | 9,20E-01 | 9,71E-01 |
| <i>THC2340768</i>      | 1,02  | 9,20E-01 | 9,71E-01 |
| <i>A_24_P477048</i>    | -1,01 | 9,20E-01 | 9,71E-01 |
| <i>XRCC6BP1</i>        | 1,01  | 9,20E-01 | 9,71E-01 |
| <i>DXS542</i>          | -1,00 | 9,20E-01 | 9,71E-01 |
| <i>PTPRJ</i>           | 1,00  | 9,20E-01 | 9,71E-01 |
| <i>DNM1L</i>           | 1,00  | 9,20E-01 | 9,71E-01 |
| <i>ENST00000310822</i> | -1,01 | 9,20E-01 | 9,71E-01 |
| <i>A_24_P203814</i>    | -1,01 | 9,20E-01 | 9,71E-01 |
| <i>A_24_P933372</i>    | -1,00 | 9,20E-01 | 9,71E-01 |
| <i>ENST00000369183</i> | 1,00  | 9,20E-01 | 9,71E-01 |
| <i>A_32_P228570</i>    | 1,00  | 9,20E-01 | 9,71E-01 |
| <i>LOC440087</i>       | -1,01 | 9,20E-01 | 9,71E-01 |
| <i>GOLGA8B</i>         | -1,01 | 9,20E-01 | 9,71E-01 |
| <i>ASZ1</i>            | -1,00 | 9,20E-01 | 9,71E-01 |
| <i>DSG2</i>            | 1,00  | 9,20E-01 | 9,71E-01 |
| <i>FLJ20280</i>        | 1,00  | 9,20E-01 | 9,71E-01 |
| <i>ENST00000371156</i> | 1,01  | 9,20E-01 | 9,71E-01 |
| <i>M74509</i>          | 1,00  | 9,21E-01 | 9,71E-01 |
| <i>PTGER3</i>          | 1,01  | 9,21E-01 | 9,71E-01 |
| <i>ST6GAL2</i>         | -1,01 | 9,21E-01 | 9,71E-01 |
| <i>TTY2</i>            | -1,01 | 9,21E-01 | 9,71E-01 |
| <i>A_24_P489649</i>    | -1,00 | 9,21E-01 | 9,71E-01 |
| <i>AF086156</i>        | 1,00  | 9,21E-01 | 9,71E-01 |
| <i>ACRBP</i>           | -1,00 | 9,21E-01 | 9,71E-01 |
| <i>ARL8A</i>           | -1,00 | 9,21E-01 | 9,71E-01 |
| <i>RAD51L3</i>         | 1,00  | 9,21E-01 | 9,71E-01 |
| <i>AK124847</i>        | 1,00  | 9,21E-01 | 9,71E-01 |
| <i>PPAP2A</i>          | 1,00  | 9,21E-01 | 9,71E-01 |
| <i>FLJ21511</i>        | 1,02  | 9,21E-01 | 9,71E-01 |
| <i>C19orf34</i>        | 1,00  | 9,21E-01 | 9,71E-01 |
| <i>TMEM18</i>          | 1,00  | 9,21E-01 | 9,71E-01 |
| <i>USP32</i>           | 1,04  | 9,21E-01 | 9,71E-01 |
| <i>PRLHR</i>           | -1,01 | 9,21E-01 | 9,71E-01 |
| <i>LIG4</i>            | 1,00  | 9,21E-01 | 9,71E-01 |
| <i>THC2359080</i>      | 1,00  | 9,21E-01 | 9,71E-01 |
| <i>AI051172</i>        | -1,00 | 9,22E-01 | 9,71E-01 |
| <i>WFIKKN2</i>         | -1,00 | 9,22E-01 | 9,71E-01 |
| <i>SOAT1</i>           | 1,00  | 9,22E-01 | 9,71E-01 |
| <i>C5orf14</i>         | 1,00  | 9,22E-01 | 9,71E-01 |
| <i>NP110384</i>        | 1,00  | 9,22E-01 | 9,71E-01 |
| <i>AW952265</i>        | -1,00 | 9,22E-01 | 9,72E-01 |

|                        |       |          |          |
|------------------------|-------|----------|----------|
| <i>SLC5A8</i>          | -1,00 | 9,22E-01 | 9,72E-01 |
| <i>HYAL4</i>           | 1,00  | 9,22E-01 | 9,72E-01 |
| <i>AA465699</i>        | 1,00  | 9,22E-01 | 9,72E-01 |
| <i>C11orf35</i>        | 1,00  | 9,22E-01 | 9,72E-01 |
| <i>C19orf26</i>        | 1,00  | 9,22E-01 | 9,72E-01 |
| <i>THC2425210</i>      | 1,00  | 9,22E-01 | 9,72E-01 |
| <i>FGFR10P</i>         | 1,00  | 9,22E-01 | 9,72E-01 |
| <i>RAB40B</i>          | 1,00  | 9,22E-01 | 9,72E-01 |
| <i>FLJ14082</i>        | 1,01  | 9,22E-01 | 9,72E-01 |
| <i>SPRR2C</i>          | -1,05 | 9,22E-01 | 9,72E-01 |
| <i>A_32_P172198</i>    | -1,01 | 9,22E-01 | 9,72E-01 |
| <i>CAMK2G</i>          | -1,01 | 9,22E-01 | 9,72E-01 |
| <i>A_32_P196669</i>    | -1,00 | 9,22E-01 | 9,72E-01 |
| <i>AY358102</i>        | -1,00 | 9,22E-01 | 9,72E-01 |
| <i>GMCL1</i>           | -1,00 | 9,22E-01 | 9,72E-01 |
| <i>THC2269604</i>      | -1,00 | 9,22E-01 | 9,72E-01 |
| <i>X15667</i>          | -1,00 | 9,22E-01 | 9,72E-01 |
| <i>ENST00000316634</i> | -1,00 | 9,23E-01 | 9,72E-01 |
| <i>BE736499</i>        | 1,00  | 9,22E-01 | 9,72E-01 |
| <i>PFKFB4</i>          | 1,00  | 9,23E-01 | 9,72E-01 |
| <i>AF203728</i>        | 1,00  | 9,23E-01 | 9,72E-01 |
| <i>A_24_P715104</i>    | 1,00  | 9,22E-01 | 9,72E-01 |
| <i>ANKRD28</i>         | 1,01  | 9,22E-01 | 9,72E-01 |
| <i>MOGAT1</i>          | 1,01  | 9,22E-01 | 9,72E-01 |
| <i>HOXA4</i>           | 1,01  | 9,23E-01 | 9,72E-01 |
| <i>LIMD1</i>           | -1,00 | 9,23E-01 | 9,72E-01 |
| <i>THC2343136</i>      | -1,02 | 9,23E-01 | 9,72E-01 |
| <i>RALA</i>            | 1,00  | 9,23E-01 | 9,72E-01 |
| <i>TTC21B</i>          | 1,00  | 9,23E-01 | 9,72E-01 |
| <i>KIF27</i>           | 1,00  | 9,23E-01 | 9,72E-01 |
| <i>NT5DC3</i>          | -1,01 | 9,23E-01 | 9,72E-01 |
| <i>LOC343052</i>       | 1,00  | 9,23E-01 | 9,72E-01 |
| <i>A_24_P306994</i>    | 1,01  | 9,23E-01 | 9,72E-01 |
| <i>THC2314644</i>      | 1,00  | 9,23E-01 | 9,72E-01 |
| <i>VBP1</i>            | 1,00  | 9,23E-01 | 9,72E-01 |
| <i>AL109708</i>        | 1,00  | 9,23E-01 | 9,72E-01 |
| <i>LOC442227</i>       | 1,01  | 9,23E-01 | 9,72E-01 |
| <i>AL157490</i>        | 1,01  | 9,23E-01 | 9,72E-01 |
| <i>DB318210</i>        | 1,00  | 9,24E-01 | 9,72E-01 |
| <i>KCTD4</i>           | 1,00  | 9,24E-01 | 9,72E-01 |
| <i>MKRN1</i>           | -1,00 | 9,24E-01 | 9,72E-01 |
| <i>AW173501</i>        | 1,00  | 9,24E-01 | 9,72E-01 |
| <i>SLC25A2</i>         | 1,00  | 9,24E-01 | 9,72E-01 |
| <i>ADMR</i>            | 1,00  | 9,24E-01 | 9,72E-01 |



|                 |       |          |          |
|-----------------|-------|----------|----------|
| ZNF447          | -1,00 | 9,24E-01 | 9,72E-01 |
| ETG09_48764     | 1,00  | 9,24E-01 | 9,72E-01 |
| A_24_P349596    | -1,01 | 9,24E-01 | 9,72E-01 |
| A_32_P102627    | -1,01 | 9,24E-01 | 9,72E-01 |
| MGC11271        | -1,00 | 9,24E-01 | 9,72E-01 |
| ENST00000297145 | -1,00 | 9,24E-01 | 9,72E-01 |
| CCDC72          | -1,00 | 9,24E-01 | 9,72E-01 |
| LOC260340       | 1,00  | 9,24E-01 | 9,72E-01 |
| THC2361688      | 1,00  | 9,24E-01 | 9,72E-01 |
| ENST00000299958 | 1,00  | 9,24E-01 | 9,72E-01 |
| A_32_P731227    | 1,00  | 9,24E-01 | 9,72E-01 |
| AP4S1           | 1,00  | 9,24E-01 | 9,72E-01 |
| PDHA1           | 1,00  | 9,24E-01 | 9,72E-01 |
| A_32_P79178     | 1,00  | 9,24E-01 | 9,72E-01 |
| CB049993        | 1,02  | 9,24E-01 | 9,72E-01 |
| A_24_P152845    | 1,02  | 9,24E-01 | 9,72E-01 |
| BC012360        | 1,00  | 9,25E-01 | 9,72E-01 |
| X94629          | 1,00  | 9,25E-01 | 9,72E-01 |
| AK022035        | -1,00 | 9,25E-01 | 9,73E-01 |
| AF315716        | -1,00 | 9,25E-01 | 9,73E-01 |
| A_24_P923695    | 1,00  | 9,25E-01 | 9,73E-01 |
| PVALB           | 1,00  | 9,25E-01 | 9,73E-01 |
| A_24_P488342    | -1,01 | 9,25E-01 | 9,73E-01 |
| PSMD3           | -1,00 | 9,25E-01 | 9,73E-01 |
| ADAL            | 1,00  | 9,25E-01 | 9,73E-01 |
| POLR3C          | 1,00  | 9,25E-01 | 9,73E-01 |
| CKAP2L          | 1,00  | 9,25E-01 | 9,73E-01 |
| EXOC2           | 1,00  | 9,25E-01 | 9,73E-01 |
| OR51E1          | 1,01  | 9,25E-01 | 9,73E-01 |
| PAQR7           | 1,03  | 9,25E-01 | 9,73E-01 |
| THC2374342      | 1,00  | 9,25E-01 | 9,73E-01 |
| ENST00000308465 | -1,00 | 9,25E-01 | 9,73E-01 |
| PRO1880         | 1,00  | 9,25E-01 | 9,73E-01 |
| RP11-45J16.2    | 1,00  | 9,25E-01 | 9,73E-01 |
| FLJ11850        | 1,00  | 9,25E-01 | 9,73E-01 |
| THC2286412      | 1,00  | 9,25E-01 | 9,73E-01 |
| CHST1           | -1,00 | 9,26E-01 | 9,73E-01 |
| FLJ20516        | -1,00 | 9,25E-01 | 9,73E-01 |
| WDR48           | 1,00  | 9,26E-01 | 9,73E-01 |
| RNPS1           | 1,00  | 9,26E-01 | 9,73E-01 |
| A_24_P512530    | 1,00  | 9,26E-01 | 9,73E-01 |
| CR618093        | 1,01  | 9,26E-01 | 9,73E-01 |
| A_24_P289573    | -1,02 | 9,26E-01 | 9,73E-01 |
| A_24_P505981    | -1,01 | 9,26E-01 | 9,73E-01 |

|                 |       |          |          |
|-----------------|-------|----------|----------|
| AF116633        | -1,00 | 9,26E-01 | 9,73E-01 |
| LETM1           | -1,00 | 9,26E-01 | 9,73E-01 |
| AK094650        | 1,00  | 9,26E-01 | 9,73E-01 |
| METTL2B         | 1,00  | 9,26E-01 | 9,73E-01 |
| A_24_P531074    | 1,01  | 9,26E-01 | 9,73E-01 |
| PEG3            | 1,01  | 9,26E-01 | 9,73E-01 |
| SLC5A2          | 1,00  | 9,26E-01 | 9,73E-01 |
| MGC70870        | 1,00  | 9,26E-01 | 9,73E-01 |
| A_24_P400815    | 1,01  | 9,26E-01 | 9,73E-01 |
| AF372624        | 1,00  | 9,26E-01 | 9,73E-01 |
| ZCD2            | -1,00 | 9,26E-01 | 9,73E-01 |
| HTR3E           | 1,00  | 9,26E-01 | 9,73E-01 |
| KRT81           | -1,01 | 9,26E-01 | 9,73E-01 |
| RBM23           | 1,00  | 9,26E-01 | 9,73E-01 |
| A_24_P920715    | 1,00  | 9,26E-01 | 9,73E-01 |
| LRP2BP          | 1,00  | 9,27E-01 | 9,73E-01 |
| GOLGA2LY1       | -1,00 | 9,27E-01 | 9,73E-01 |
| EMR1            | 1,01  | 9,27E-01 | 9,73E-01 |
| A_23_P374664    | 1,00  | 9,27E-01 | 9,73E-01 |
| GABRA1          | 1,00  | 9,27E-01 | 9,73E-01 |
| ENST00000299969 | 1,00  | 9,27E-01 | 9,73E-01 |
| WDR79           | 1,00  | 9,27E-01 | 9,73E-01 |
| DGKE            | -1,00 | 9,27E-01 | 9,73E-01 |
| RP11-393H10.2   | 1,00  | 9,27E-01 | 9,73E-01 |
| THC2318720      | 1,00  | 9,27E-01 | 9,73E-01 |
| AK130530        | 1,00  | 9,27E-01 | 9,73E-01 |
| AK058041        | 1,00  | 9,27E-01 | 9,73E-01 |
| CPLX3           | 1,02  | 9,27E-01 | 9,73E-01 |
| AV721971        | 1,00  | 9,27E-01 | 9,73E-01 |
| RP13-347D8.3    | -1,01 | 9,27E-01 | 9,74E-01 |
| LOC131873       | -1,00 | 9,27E-01 | 9,74E-01 |
| ARNT2           | 1,01  | 9,27E-01 | 9,74E-01 |
| MAOB            | 1,01  | 9,27E-01 | 9,74E-01 |
| ENST00000377171 | 1,00  | 9,27E-01 | 9,74E-01 |
| NAPRT1          | 1,00  | 9,27E-01 | 9,74E-01 |
| ENST00000338834 | -1,03 | 9,28E-01 | 9,74E-01 |
| ARPC1B          | 1,01  | 9,28E-01 | 9,74E-01 |
| GARS            | 1,00  | 9,28E-01 | 9,74E-01 |
| DA180164        | -1,01 | 9,28E-01 | 9,74E-01 |
| A_32_P100338    | 1,01  | 9,28E-01 | 9,74E-01 |
| FKBP11          | -1,01 | 9,28E-01 | 9,74E-01 |
| A_24_P212864    | -1,01 | 9,28E-01 | 9,74E-01 |
| TBL1Y           | -1,01 | 9,28E-01 | 9,74E-01 |
| A_32_P35031     | -1,01 | 9,28E-01 | 9,74E-01 |

|                        |       |          |          |
|------------------------|-------|----------|----------|
| <i>BC035180</i>        | 1,00  | 9,28E-01 | 9,74E-01 |
| <i>ZBTB80S</i>         | 1,00  | 9,28E-01 | 9,74E-01 |
| <i>BI050742</i>        | 1,00  | 9,28E-01 | 9,74E-01 |
| <i>ENST00000371211</i> | 1,00  | 9,28E-01 | 9,74E-01 |
| <i>C17orf70</i>        | 1,00  | 9,28E-01 | 9,74E-01 |
| <i>BX091993</i>        | -1,02 | 9,28E-01 | 9,74E-01 |
| <i>ENST00000356104</i> | -1,01 | 9,28E-01 | 9,74E-01 |
| <i>CK824959</i>        | 1,00  | 9,28E-01 | 9,74E-01 |
| <i>PDCD4</i>           | 1,00  | 9,28E-01 | 9,74E-01 |
| <i>UNC84A</i>          | 1,00  | 9,29E-01 | 9,74E-01 |
| <i>AK024927</i>        | -1,01 | 9,29E-01 | 9,74E-01 |
| <i>INTS7</i>           | 1,00  | 9,29E-01 | 9,74E-01 |
| <i>KCNA3</i>           | 1,00  | 9,29E-01 | 9,74E-01 |
| <i>TOB2</i>            | 1,00  | 9,29E-01 | 9,74E-01 |
| <i>TOP3B</i>           | 1,00  | 9,29E-01 | 9,74E-01 |
| <i>BF195408</i>        | 1,00  | 9,29E-01 | 9,74E-01 |
| <i>LOC391241</i>       | 1,01  | 9,29E-01 | 9,74E-01 |
| <i>A_24_P204664</i>    | 1,01  | 9,29E-01 | 9,74E-01 |
| <i>LOC400620</i>       | 1,00  | 9,29E-01 | 9,74E-01 |
| <i>BX648133</i>        | -1,00 | 9,29E-01 | 9,74E-01 |
| <i>C9orf98</i>         | 1,00  | 9,29E-01 | 9,74E-01 |
| <i>THC2304540</i>      | 1,00  | 9,29E-01 | 9,74E-01 |
| <i>THC2406134</i>      | 1,01  | 9,29E-01 | 9,74E-01 |
| <i>A_24_P932833</i>    | 1,00  | 9,29E-01 | 9,74E-01 |
| <i>PPAN</i>            | 1,00  | 9,29E-01 | 9,74E-01 |
| <i>THC2281165</i>      | -1,00 | 9,29E-01 | 9,74E-01 |
| <i>U80747</i>          | -1,00 | 9,29E-01 | 9,74E-01 |
| <i>C10orf7</i>         | 1,00  | 9,30E-01 | 9,75E-01 |
| <i>ENST00000256969</i> | 1,00  | 9,30E-01 | 9,75E-01 |
| <i>AL833884</i>        | 1,00  | 9,30E-01 | 9,75E-01 |
| <i>TRAF1</i>           | 1,00  | 9,30E-01 | 9,75E-01 |
| <i>LOC92017</i>        | -1,00 | 9,30E-01 | 9,75E-01 |
| <i>A_24_P238386</i>    | 1,00  | 9,30E-01 | 9,75E-01 |
| <i>LGICZ1</i>          | -1,00 | 9,30E-01 | 9,75E-01 |
| <i>THC2268341</i>      | 1,00  | 9,30E-01 | 9,75E-01 |
| <i>THC2399982</i>      | 1,00  | 9,30E-01 | 9,75E-01 |
| <i>TRIM72</i>          | -1,00 | 9,30E-01 | 9,75E-01 |
| <i>THC2435618</i>      | 1,00  | 9,30E-01 | 9,75E-01 |
| <i>ENST00000327591</i> | 1,01  | 9,30E-01 | 9,75E-01 |
| <i>U80770</i>          | 1,00  | 9,31E-01 | 9,75E-01 |
| <i>FUT2</i>            | 1,00  | 9,31E-01 | 9,75E-01 |
| <i>STIP1</i>           | 1,00  | 9,31E-01 | 9,75E-01 |
| <i>A_24_P554882</i>    | -1,00 | 9,31E-01 | 9,75E-01 |
| <i>SSR4</i>            | -1,01 | 9,31E-01 | 9,75E-01 |

|                        |       |          |          |
|------------------------|-------|----------|----------|
| <i>LOC389786</i>       | 1,00  | 9,31E-01 | 9,75E-01 |
| <i>PRRG3</i>           | -1,01 | 9,31E-01 | 9,76E-01 |
| <i>RPIB9</i>           | -1,01 | 9,31E-01 | 9,76E-01 |
| <i>ENST00000333982</i> | -1,01 | 9,31E-01 | 9,76E-01 |
| <i>PARG</i>            | 1,00  | 9,31E-01 | 9,76E-01 |
| <i>SLC36A2</i>         | 1,00  | 9,31E-01 | 9,76E-01 |
| <i>C12orf40</i>        | 1,00  | 9,31E-01 | 9,76E-01 |
| <i>RAB25</i>           | -1,02 | 9,32E-01 | 9,76E-01 |
| <i>BX350256</i>        | -1,01 | 9,32E-01 | 9,76E-01 |
| <i>A_32_P20884</i>     | -1,00 | 9,32E-01 | 9,76E-01 |
| <i>EDA</i>             | -1,00 | 9,31E-01 | 9,76E-01 |
| <i>MRPL1</i>           | 1,00  | 9,31E-01 | 9,76E-01 |
| <i>DPP10</i>           | 1,00  | 9,32E-01 | 9,76E-01 |
| <i>ENST00000338106</i> | 1,00  | 9,32E-01 | 9,76E-01 |
| <i>AK129584</i>        | 1,00  | 9,31E-01 | 9,76E-01 |
| <i>PEX7</i>            | 1,00  | 9,32E-01 | 9,76E-01 |
| <i>WDSOF1</i>          | 1,00  | 9,32E-01 | 9,76E-01 |
| <i>PLEKHF2</i>         | 1,00  | 9,32E-01 | 9,76E-01 |
| <i>THC2313497</i>      | 1,01  | 9,32E-01 | 9,76E-01 |
| <i>KRT13</i>           | 1,05  | 9,31E-01 | 9,76E-01 |
| <i>PLB1</i>            | 1,00  | 9,32E-01 | 9,76E-01 |
| <i>PIK4CB</i>          | 1,00  | 9,32E-01 | 9,76E-01 |
| <i>AI248320</i>        | -1,02 | 9,32E-01 | 9,76E-01 |
| <i>TMPO</i>            | -1,00 | 9,32E-01 | 9,76E-01 |
| <i>A_24_P358765</i>    | -1,00 | 9,32E-01 | 9,76E-01 |
| <i>THC2446149</i>      | 1,00  | 9,32E-01 | 9,76E-01 |
| <i>RBMV1E</i>          | 1,00  | 9,32E-01 | 9,76E-01 |
| <i>PHF20</i>           | 1,00  | 9,32E-01 | 9,76E-01 |
| <i>UBL4B</i>           | 1,00  | 9,32E-01 | 9,76E-01 |
| <i>HPCAL4</i>          | 1,00  | 9,32E-01 | 9,76E-01 |
| <i>A_24_P651129</i>    | 1,00  | 9,32E-01 | 9,76E-01 |
| <i>BC039479</i>        | 1,00  | 9,32E-01 | 9,76E-01 |
| <i>BID</i>             | 1,00  | 9,32E-01 | 9,76E-01 |
| <i>LRRC16</i>          | 1,01  | 9,32E-01 | 9,76E-01 |
| <i>AK021676</i>        | 1,01  | 9,32E-01 | 9,76E-01 |
| <i>KRTAP3-1</i>        | 1,00  | 9,32E-01 | 9,76E-01 |
| <i>APITD1</i>          | 1,00  | 9,32E-01 | 9,76E-01 |
| <i>RAB9A</i>           | 1,01  | 9,32E-01 | 9,76E-01 |
| <i>CCDC66</i>          | -1,01 | 9,33E-01 | 9,76E-01 |
| <i>ENST00000273340</i> | -1,00 | 9,33E-01 | 9,76E-01 |
| <i>RNF183</i>          | 1,00  | 9,33E-01 | 9,76E-01 |
| <i>LOC643429</i>       | 1,00  | 9,33E-01 | 9,76E-01 |
| <i>CHRN3</i>           | 1,00  | 9,33E-01 | 9,76E-01 |
| <i>C22orf9</i>         | 1,00  | 9,33E-01 | 9,76E-01 |

|                        |       |          |          |
|------------------------|-------|----------|----------|
| <i>GBP3</i>            | -1,01 | 9,33E-01 | 9,76E-01 |
| <i>C2orf11</i>         | -1,01 | 9,33E-01 | 9,76E-01 |
| <i>NAV2</i>            | -1,01 | 9,33E-01 | 9,76E-01 |
| <i>CR611122</i>        | -1,01 | 9,33E-01 | 9,76E-01 |
| <i>GPR82</i>           | 1,00  | 9,33E-01 | 9,76E-01 |
| <i>SIPA1</i>           | 1,00  | 9,33E-01 | 9,76E-01 |
| <i>ATP2C1</i>          | 1,00  | 9,33E-01 | 9,76E-01 |
| <i>POLA</i>            | 1,00  | 9,33E-01 | 9,76E-01 |
| <i>THC2442876</i>      | 1,00  | 9,33E-01 | 9,76E-01 |
| <i>BX647075</i>        | 1,00  | 9,33E-01 | 9,76E-01 |
| <i>IL1RL2</i>          | 1,00  | 9,33E-01 | 9,76E-01 |
| <i>DSCAM</i>           | 1,00  | 9,33E-01 | 9,76E-01 |
| <i>TRIP13</i>          | 1,00  | 9,33E-01 | 9,76E-01 |
| <i>A_24_P932405</i>    | 1,00  | 9,33E-01 | 9,76E-01 |
| <i>F2RL1</i>           | 1,00  | 9,33E-01 | 9,76E-01 |
| <i>HSPE1</i>           | 1,00  | 9,33E-01 | 9,76E-01 |
| <i>GPR30</i>           | 1,01  | 9,33E-01 | 9,76E-01 |
| <i>C7orf33</i>         | 1,01  | 9,33E-01 | 9,76E-01 |
| <i>LOC646345</i>       | 1,01  | 9,33E-01 | 9,76E-01 |
| <i>ENST00000309558</i> | 1,01  | 9,33E-01 | 9,76E-01 |
| <i>LOC390211</i>       | 1,02  | 9,33E-01 | 9,76E-01 |
| <i>THC2377793</i>      | 1,02  | 9,33E-01 | 9,76E-01 |
| <i>BCL7A</i>           | -1,01 | 9,34E-01 | 9,76E-01 |
| <i>THC2376224</i>      | -1,00 | 9,34E-01 | 9,76E-01 |
| <i>OR8B8</i>           | -1,00 | 9,34E-01 | 9,76E-01 |
| <i>AA662695</i>        | -1,00 | 9,34E-01 | 9,76E-01 |
| <i>CRISP3</i>          | -1,00 | 9,34E-01 | 9,76E-01 |
| <i>TDRD6</i>           | 1,00  | 9,34E-01 | 9,76E-01 |
| <i>AI364887</i>        | 1,00  | 9,34E-01 | 9,76E-01 |
| <i>THC2309008</i>      | 1,00  | 9,34E-01 | 9,76E-01 |
| <i>THC2370851</i>      | 1,00  | 9,34E-01 | 9,76E-01 |
| <i>AI374885</i>        | 1,00  | 9,34E-01 | 9,76E-01 |
| <i>RFWD3</i>           | 1,00  | 9,34E-01 | 9,76E-01 |
| <i>LOC440895</i>       | 1,00  | 9,34E-01 | 9,76E-01 |
| <i>C13orf1</i>         | 1,00  | 9,34E-01 | 9,76E-01 |
| <i>A_24_P409760</i>    | 1,00  | 9,34E-01 | 9,76E-01 |
| <i>LOC402251</i>       | 1,01  | 9,34E-01 | 9,76E-01 |
| <i>GPR126</i>          | -1,01 | 9,34E-01 | 9,76E-01 |
| <i>UPF3B</i>           | 1,00  | 9,34E-01 | 9,76E-01 |
| <i>APOA5</i>           | 1,00  | 9,34E-01 | 9,76E-01 |
| <i>ATPIF1</i>          | 1,00  | 9,34E-01 | 9,76E-01 |
| <i>KEL</i>             | 1,00  | 9,34E-01 | 9,76E-01 |
| <i>A_24_P178154</i>    | 1,01  | 9,34E-01 | 9,76E-01 |
| <i>PENK</i>            | 1,01  | 9,34E-01 | 9,76E-01 |

|                        |       |          |          |
|------------------------|-------|----------|----------|
| <i>SH2D4B</i>          | 1,02  | 9,34E-01 | 9,76E-01 |
| <i>CLN3</i>            | 1,00  | 9,34E-01 | 9,76E-01 |
| <i>C21orf25</i>        | 1,00  | 9,34E-01 | 9,76E-01 |
| <i>BU633484</i>        | -1,00 | 9,34E-01 | 9,76E-01 |
| <i>CXorf40B</i>        | 1,00  | 9,34E-01 | 9,76E-01 |
| <i>A_24_P127661</i>    | -1,01 | 9,35E-01 | 9,76E-01 |
| <i>ENST00000357504</i> | -1,01 | 9,35E-01 | 9,76E-01 |
| <i>DHRX</i>            | -1,00 | 9,35E-01 | 9,76E-01 |
| <i>CDK5R1</i>          | -1,00 | 9,35E-01 | 9,76E-01 |
| <i>TM9SF3</i>          | 1,00  | 9,35E-01 | 9,76E-01 |
| <i>EPHA8</i>           | 1,00  | 9,35E-01 | 9,76E-01 |
| <i>KIAA0683</i>        | 1,00  | 9,35E-01 | 9,76E-01 |
| <i>A_23_P119152</i>    | 1,00  | 9,35E-01 | 9,76E-01 |
| <i>ENST00000297540</i> | 1,00  | 9,35E-01 | 9,76E-01 |
| <i>A_32_P51975</i>     | 1,00  | 9,35E-01 | 9,76E-01 |
| <i>RAP2A</i>           | 1,01  | 9,35E-01 | 9,76E-01 |
| <i>KIAA1576</i>        | 1,01  | 9,35E-01 | 9,76E-01 |
| <i>PRSS36</i>          | 1,02  | 9,35E-01 | 9,76E-01 |
| <i>LOC284454</i>       | -1,01 | 9,35E-01 | 9,76E-01 |
| <i>MATR3</i>           | 1,00  | 9,35E-01 | 9,76E-01 |
| <i>ENST00000356572</i> | 1,00  | 9,35E-01 | 9,76E-01 |
| <i>LOC283861</i>       | -1,01 | 9,35E-01 | 9,76E-01 |
| <i>ENST00000337682</i> | -1,00 | 9,35E-01 | 9,76E-01 |
| <i>THC2406907</i>      | -1,00 | 9,35E-01 | 9,76E-01 |
| <i>ENST00000244820</i> | -1,00 | 9,35E-01 | 9,76E-01 |
| <i>LOC441244</i>       | -1,00 | 9,35E-01 | 9,76E-01 |
| <i>CRTC3</i>           | -1,00 | 9,35E-01 | 9,76E-01 |
| <i>BU567141</i>        | 1,00  | 9,35E-01 | 9,76E-01 |
| <i>A_24_P127543</i>    | -1,01 | 9,35E-01 | 9,76E-01 |
| <i>tcag7.1239</i>      | -1,01 | 9,36E-01 | 9,76E-01 |
| <i>BX647685</i>        | -1,01 | 9,35E-01 | 9,76E-01 |
| <i>CRYZ</i>            | -1,01 | 9,36E-01 | 9,76E-01 |
| <i>FSCN1</i>           | -1,00 | 9,36E-01 | 9,76E-01 |
| <i>AK055696</i>        | 1,00  | 9,36E-01 | 9,76E-01 |
| <i>FAM9A</i>           | 1,00  | 9,36E-01 | 9,76E-01 |
| <i>A_32_P210193</i>    | 1,01  | 9,36E-01 | 9,76E-01 |
| <i>CCR7</i>            | 1,01  | 9,36E-01 | 9,76E-01 |
| <i>DNAH8</i>           | 1,00  | 9,36E-01 | 9,76E-01 |
| <i>FAM3B</i>           | -1,01 | 9,36E-01 | 9,76E-01 |
| <i>THC2286419</i>      | 1,00  | 9,36E-01 | 9,76E-01 |
| <i>PLD3</i>            | -1,04 | 9,36E-01 | 9,76E-01 |
| <i>A_24_P153324</i>    | -1,01 | 9,36E-01 | 9,76E-01 |
| <i>SAMD10</i>          | -1,01 | 9,36E-01 | 9,76E-01 |
| <i>THC2409452</i>      | 1,00  | 9,36E-01 | 9,76E-01 |

|                 |       |          |          |
|-----------------|-------|----------|----------|
| SGCZ            | 1,00  | 9,36E-01 | 9,76E-01 |
| AY037163        | 1,00  | 9,36E-01 | 9,76E-01 |
| BOLA2           | 1,00  | 9,36E-01 | 9,76E-01 |
| MAP6            | 1,01  | 9,36E-01 | 9,76E-01 |
| FAM98C          | 1,04  | 9,36E-01 | 9,76E-01 |
| WDR44           | 1,00  | 9,36E-01 | 9,76E-01 |
| A_23_P216071    | 1,01  | 9,36E-01 | 9,76E-01 |
| A_24_P928112    | 1,00  | 9,36E-01 | 9,77E-01 |
| ENST00000308963 | 1,00  | 9,36E-01 | 9,77E-01 |
| A_24_P698816    | 1,01  | 9,37E-01 | 9,77E-01 |
| C10orf62        | 1,00  | 9,37E-01 | 9,77E-01 |
| THC2432207      | -1,00 | 9,37E-01 | 9,77E-01 |
| SULT2A1         | 1,00  | 9,37E-01 | 9,77E-01 |
| ENST00000323108 | 1,00  | 9,37E-01 | 9,77E-01 |
| A_24_P926229    | 1,00  | 9,37E-01 | 9,77E-01 |
| CA306742        | 1,00  | 9,37E-01 | 9,77E-01 |
| W42710          | -1,01 | 9,37E-01 | 9,77E-01 |
| A_32_P758538    | -1,01 | 9,37E-01 | 9,77E-01 |
| A_24_P83968     | -1,01 | 9,37E-01 | 9,77E-01 |
| RTDR1           | 1,00  | 9,37E-01 | 9,77E-01 |
| TRPA1           | 1,01  | 9,37E-01 | 9,77E-01 |
| INTS6           | -1,00 | 9,37E-01 | 9,77E-01 |
| PPIH            | -1,01 | 9,37E-01 | 9,77E-01 |
| WHDC1           | 1,00  | 9,37E-01 | 9,77E-01 |
| DKFZp547E087    | -1,00 | 9,38E-01 | 9,77E-01 |
| DLG1            | 1,00  | 9,38E-01 | 9,77E-01 |
| ENST00000331979 | 1,00  | 9,38E-01 | 9,77E-01 |
| AK057320        | 1,00  | 9,38E-01 | 9,77E-01 |
| LOC389641       | 1,00  | 9,38E-01 | 9,77E-01 |
| HDLBP           | 1,00  | 9,38E-01 | 9,77E-01 |
| PACSIN3         | -1,00 | 9,38E-01 | 9,77E-01 |
| GUCY1B2         | -1,01 | 9,38E-01 | 9,78E-01 |
| JAM2            | -1,01 | 9,38E-01 | 9,78E-01 |
| A_32_P73184     | 1,00  | 9,38E-01 | 9,78E-01 |
| SIGLEC9         | 1,00  | 9,38E-01 | 9,78E-01 |
| BX093417        | 1,00  | 9,38E-01 | 9,78E-01 |
| CART            | 1,00  | 9,38E-01 | 9,78E-01 |
| GSTT1           | -1,03 | 9,38E-01 | 9,78E-01 |
| A_24_P929867    | -1,00 | 9,38E-01 | 9,78E-01 |
| BC027586        | -1,00 | 9,38E-01 | 9,78E-01 |
| A_24_P255965    | 1,00  | 9,38E-01 | 9,78E-01 |
| C10orf111       | 1,00  | 9,38E-01 | 9,78E-01 |
| MAGEC3          | 1,00  | 9,38E-01 | 9,78E-01 |
| A_32_P222872    | -1,00 | 9,39E-01 | 9,78E-01 |

|                        |       |          |          |
|------------------------|-------|----------|----------|
| <i>OR4D5</i>           | 1,00  | 9,39E-01 | 9,78E-01 |
| <i>A_24_P119094</i>    | 1,01  | 9,39E-01 | 9,78E-01 |
| <i>ADAM33</i>          | 1,00  | 9,39E-01 | 9,78E-01 |
| <i>MGC4859</i>         | 1,00  | 9,39E-01 | 9,78E-01 |
| <i>FAM11A</i>          | 1,00  | 9,39E-01 | 9,78E-01 |
| <i>LRPAP1</i>          | 1,00  | 9,39E-01 | 9,78E-01 |
| <i>NMUR1</i>           | -1,01 | 9,39E-01 | 9,78E-01 |
| <i>MGC21874</i>        | -1,00 | 9,39E-01 | 9,78E-01 |
| <i>MPHOSPH9</i>        | 1,00  | 9,39E-01 | 9,78E-01 |
| <i>RAD18</i>           | 1,00  | 9,39E-01 | 9,78E-01 |
| <i>SLA/LP</i>          | 1,00  | 9,39E-01 | 9,78E-01 |
| <i>C10orf68</i>        | 1,00  | 9,39E-01 | 9,78E-01 |
| <i>HNF4G</i>           | 1,00  | 9,39E-01 | 9,78E-01 |
| <i>TMUB2</i>           | 1,00  | 9,39E-01 | 9,78E-01 |
| <i>FLJ38596</i>        | -1,00 | 9,40E-01 | 9,78E-01 |
| <i>POLR3A</i>          | 1,00  | 9,40E-01 | 9,78E-01 |
| <i>AADAACL2</i>        | -1,01 | 9,40E-01 | 9,78E-01 |
| <i>ITM2C</i>           | -1,01 | 9,40E-01 | 9,78E-01 |
| <i>A_24_P940375</i>    | 1,00  | 9,40E-01 | 9,78E-01 |
| <i>A_32_P113871</i>    | 1,00  | 9,40E-01 | 9,78E-01 |
| <i>RC3</i>             | 1,00  | 9,40E-01 | 9,78E-01 |
| <i>NOL3</i>            | 1,00  | 9,40E-01 | 9,78E-01 |
| <i>EPHA6</i>           | -1,00 | 9,40E-01 | 9,78E-01 |
| <i>CPN2</i>            | 1,00  | 9,40E-01 | 9,78E-01 |
| <i>CDK5</i>            | 1,00  | 9,40E-01 | 9,78E-01 |
| <i>ING2</i>            | 1,00  | 9,40E-01 | 9,78E-01 |
| <i>WRNIP1</i>          | 1,00  | 9,40E-01 | 9,78E-01 |
| <i>CAPZA3</i>          | 1,00  | 9,40E-01 | 9,78E-01 |
| <i>FABP2</i>           | 1,00  | 9,40E-01 | 9,78E-01 |
| <i>PFDN6</i>           | 1,00  | 9,40E-01 | 9,78E-01 |
| <i>AF426412</i>        | 1,00  | 9,40E-01 | 9,78E-01 |
| <i>AK026304</i>        | 1,00  | 9,40E-01 | 9,78E-01 |
| <i>LOC646627</i>       | -1,00 | 9,41E-01 | 9,78E-01 |
| <i>ENST00000372594</i> | -1,00 | 9,40E-01 | 9,78E-01 |
| <i>THC2388671</i>      | 1,00  | 9,40E-01 | 9,78E-01 |
| <i>A_24_P24142</i>     | 1,00  | 9,40E-01 | 9,78E-01 |
| <i>MMP8</i>            | 1,00  | 9,40E-01 | 9,78E-01 |
| <i>RALGPS2</i>         | 1,00  | 9,40E-01 | 9,78E-01 |
| <i>NRGN</i>            | 1,01  | 9,40E-01 | 9,78E-01 |
| <i>RESP18</i>          | -1,01 | 9,41E-01 | 9,78E-01 |
| <i>SOCS1</i>           | -1,01 | 9,41E-01 | 9,78E-01 |
| <i>ABCG1</i>           | -1,01 | 9,41E-01 | 9,78E-01 |
| <i>AL359650</i>        | -1,00 | 9,41E-01 | 9,78E-01 |
| <i>FLJ25758</i>        | 1,00  | 9,41E-01 | 9,78E-01 |



|                        |       |          |          |
|------------------------|-------|----------|----------|
| <i>PCBP2</i>           | 1,00  | 9,41E-01 | 9,78E-01 |
| <i>ENST00000301896</i> | 1,00  | 9,41E-01 | 9,78E-01 |
| <i>FRMPD2</i>          | 1,00  | 9,41E-01 | 9,78E-01 |
| <i>A_32_P179562</i>    | 1,00  | 9,41E-01 | 9,78E-01 |
| <i>AL080072</i>        | 1,00  | 9,41E-01 | 9,78E-01 |
| <i>ALS2CR13</i>        | -1,00 | 9,41E-01 | 9,78E-01 |
| <i>THC2364018</i>      | 1,01  | 9,41E-01 | 9,78E-01 |
| <i>BC031278</i>        | -1,01 | 9,41E-01 | 9,79E-01 |
| <i>DCC</i>             | 1,00  | 9,41E-01 | 9,79E-01 |
| <i>DLG5</i>            | 1,00  | 9,41E-01 | 9,79E-01 |
| <i>THC2369885</i>      | 1,00  | 9,41E-01 | 9,79E-01 |
| <i>THC2343334</i>      | 1,00  | 9,41E-01 | 9,79E-01 |
| <i>A_24_P629163</i>    | 1,00  | 9,41E-01 | 9,79E-01 |
| <i>RGSL1</i>           | 1,00  | 9,41E-01 | 9,79E-01 |
| <i>G36550</i>          | 1,00  | 9,41E-01 | 9,79E-01 |
| <i>C14orf174</i>       | 1,00  | 9,41E-01 | 9,79E-01 |
| <i>A_24_P178784</i>    | 1,00  | 9,41E-01 | 9,79E-01 |
| <i>CSN2</i>            | 1,00  | 9,41E-01 | 9,79E-01 |
| <i>RFX1</i>            | 1,00  | 9,41E-01 | 9,79E-01 |
| <i>VKORC1</i>          | -1,00 | 9,42E-01 | 9,79E-01 |
| <i>RARSL</i>           | 1,00  | 9,42E-01 | 9,79E-01 |
| <i>LOC643197</i>       | 1,00  | 9,42E-01 | 9,79E-01 |
| <i>INSM2</i>           | 1,00  | 9,42E-01 | 9,79E-01 |
| <i>A_24_P878561</i>    | 1,00  | 9,42E-01 | 9,79E-01 |
| <i>A_24_P921633</i>    | 1,00  | 9,42E-01 | 9,79E-01 |
| <i>ETG09_205211</i>    | 1,00  | 9,42E-01 | 9,79E-01 |
| <i>PLA2G2D</i>         | 1,00  | 9,42E-01 | 9,79E-01 |
| <i>WDHD1</i>           | 1,00  | 9,42E-01 | 9,79E-01 |
| <i>LOC494558</i>       | 1,00  | 9,42E-01 | 9,79E-01 |
| <i>PRDM2</i>           | 1,00  | 9,42E-01 | 9,79E-01 |
| <i>KLHL7</i>           | 1,00  | 9,42E-01 | 9,79E-01 |
| <i>ENST00000343518</i> | 1,00  | 9,42E-01 | 9,79E-01 |
| <i>AK095243</i>        | 1,00  | 9,42E-01 | 9,79E-01 |
| <i>THC2445821</i>      | 1,00  | 9,42E-01 | 9,79E-01 |
| <i>TBC1D10A</i>        | 1,00  | 9,42E-01 | 9,79E-01 |
| <i>A_24_P418019</i>    | 1,00  | 9,42E-01 | 9,79E-01 |
| <i>TBC1D12</i>         | 1,00  | 9,42E-01 | 9,79E-01 |
| <i>SRR</i>             | 1,00  | 9,42E-01 | 9,79E-01 |
| <i>BE671947</i>        | 1,00  | 9,42E-01 | 9,79E-01 |
| <i>PANK4</i>           | 1,00  | 9,42E-01 | 9,79E-01 |
| <i>PARVB</i>           | 1,00  | 9,42E-01 | 9,79E-01 |
| <i>MGC15885</i>        | 1,00  | 9,42E-01 | 9,79E-01 |
| <i>BBOX1</i>           | 1,01  | 9,42E-01 | 9,79E-01 |
| <i>CHST2</i>           | 1,01  | 9,42E-01 | 9,79E-01 |

|                        |       |          |          |
|------------------------|-------|----------|----------|
| <i>CTTN</i>            | 1,00  | 9,42E-01 | 9,79E-01 |
| <i>THC2293126</i>      | 1,00  | 9,43E-01 | 9,79E-01 |
| <i>A_24_P75308</i>     | -1,01 | 9,43E-01 | 9,79E-01 |
| <i>CR598481</i>        | 1,00  | 9,43E-01 | 9,79E-01 |
| <i>FOXA3</i>           | 1,00  | 9,43E-01 | 9,79E-01 |
| <i>CCL8</i>            | 1,02  | 9,43E-01 | 9,79E-01 |
| <i>THC2328913</i>      | -1,00 | 9,43E-01 | 9,79E-01 |
| <i>TAS1R2</i>          | 1,00  | 9,43E-01 | 9,79E-01 |
| <i>ETG08_142674</i>    | 1,00  | 9,43E-01 | 9,79E-01 |
| <i>NXF1</i>            | 1,00  | 9,43E-01 | 9,79E-01 |
| <i>A_24_P712882</i>    | 1,00  | 9,43E-01 | 9,79E-01 |
| <i>RPS6KA6</i>         | 1,00  | 9,43E-01 | 9,79E-01 |
| <i>A_24_P84558</i>     | -1,00 | 9,43E-01 | 9,79E-01 |
| <i>CTSD</i>            | 1,01  | 9,43E-01 | 9,79E-01 |
| <i>ENST00000303310</i> | 1,00  | 9,43E-01 | 9,79E-01 |
| <i>C20orf194</i>       | 1,00  | 9,43E-01 | 9,79E-01 |
| <i>ULK1</i>            | 1,00  | 9,43E-01 | 9,79E-01 |
| <i>ENST00000328394</i> | 1,00  | 9,43E-01 | 9,79E-01 |
| <i>THC2442548</i>      | 1,00  | 9,43E-01 | 9,79E-01 |
| <i>MGC12982</i>        | -1,00 | 9,43E-01 | 9,79E-01 |
| <i>ENST00000268714</i> | 1,00  | 9,44E-01 | 9,79E-01 |
| <i>TFAP2E</i>          | 1,00  | 9,44E-01 | 9,79E-01 |
| <i>LOC338864</i>       | 1,00  | 9,44E-01 | 9,79E-01 |
| <i>C20orf151</i>       | 1,00  | 9,44E-01 | 9,79E-01 |
| <i>NR2F6</i>           | 1,00  | 9,44E-01 | 9,79E-01 |
| <i>N46343</i>          | 1,00  | 9,44E-01 | 9,79E-01 |
| <i>AF119914</i>        | 1,00  | 9,44E-01 | 9,79E-01 |
| <i>PRAMEF1</i>         | 1,00  | 9,44E-01 | 9,79E-01 |
| <i>C3orf42</i>         | 1,00  | 9,44E-01 | 9,79E-01 |
| <i>A_32_P39991</i>     | 1,00  | 9,44E-01 | 9,79E-01 |
| <i>FAM82C</i>          | 1,00  | 9,44E-01 | 9,80E-01 |
| <i>BPIL2</i>           | 1,00  | 9,44E-01 | 9,80E-01 |
| <i>A_32_P46544</i>     | 1,00  | 9,44E-01 | 9,80E-01 |
| <i>AK090442</i>        | 1,00  | 9,44E-01 | 9,80E-01 |
| <i>WFDC13</i>          | -1,00 | 9,44E-01 | 9,80E-01 |
| <i>A_24_P933530</i>    | 1,00  | 9,44E-01 | 9,80E-01 |
| <i>PAH</i>             | 1,00  | 9,45E-01 | 9,80E-01 |
| <i>BM675169</i>        | 1,00  | 9,45E-01 | 9,80E-01 |
| <i>AK026267</i>        | 1,00  | 9,45E-01 | 9,80E-01 |
| <i>RANBP10</i>         | 1,00  | 9,45E-01 | 9,80E-01 |
| <i>AL516445</i>        | 1,00  | 9,45E-01 | 9,80E-01 |
| <i>GATA4</i>           | 1,00  | 9,45E-01 | 9,80E-01 |
| <i>COBRA1</i>          | 1,00  | 9,45E-01 | 9,80E-01 |
| <i>UBD</i>             | 1,02  | 9,45E-01 | 9,80E-01 |

|                        |       |          |          |
|------------------------|-------|----------|----------|
| <i>BC034319</i>        | -1,00 | 9,45E-01 | 9,80E-01 |
| <i>RFX5</i>            | 1,00  | 9,45E-01 | 9,80E-01 |
| <i>SCML2</i>           | 1,00  | 9,45E-01 | 9,80E-01 |
| <i>A_24_P922440</i>    | 1,00  | 9,45E-01 | 9,80E-01 |
| <i>AK123127</i>        | 1,00  | 9,45E-01 | 9,80E-01 |
| <i>CCDC54</i>          | 1,00  | 9,45E-01 | 9,80E-01 |
| <i>ENST00000360879</i> | 1,00  | 9,45E-01 | 9,80E-01 |
| <i>CCDC70</i>          | 1,00  | 9,45E-01 | 9,80E-01 |
| <i>COVA1</i>           | 1,00  | 9,45E-01 | 9,80E-01 |
| <i>PCDH8</i>           | 1,01  | 9,45E-01 | 9,80E-01 |
| <i>BC022928</i>        | -1,01 | 9,45E-01 | 9,80E-01 |
| <i>BX105574</i>        | 1,00  | 9,45E-01 | 9,80E-01 |
| <i>LOC401101</i>       | 1,01  | 9,45E-01 | 9,80E-01 |
| <i>A_24_P332504</i>    | -1,01 | 9,46E-01 | 9,80E-01 |
| <i>T63871</i>          | 1,00  | 9,46E-01 | 9,80E-01 |
| <i>CR620599</i>        | 1,00  | 9,46E-01 | 9,80E-01 |
| <i>LOC646686</i>       | 1,00  | 9,46E-01 | 9,80E-01 |
| <i>A_24_P118281</i>    | -1,01 | 9,46E-01 | 9,80E-01 |
| <i>LRRC44</i>          | 1,00  | 9,46E-01 | 9,80E-01 |
| <i>MPV17</i>           | 1,00  | 9,46E-01 | 9,80E-01 |
| <i>THC2346121</i>      | 1,00  | 9,46E-01 | 9,80E-01 |
| <i>SIRT1</i>           | 1,00  | 9,46E-01 | 9,80E-01 |
| <i>CA314936</i>        | -1,00 | 9,46E-01 | 9,80E-01 |
| <i>LOC389857</i>       | 1,00  | 9,46E-01 | 9,80E-01 |
| <i>A_24_P490011</i>    | 1,00  | 9,46E-01 | 9,80E-01 |
| <i>THC2415368</i>      | 1,01  | 9,46E-01 | 9,80E-01 |
| <i>NegativeControl</i> | 1,00  | 9,46E-01 | 9,80E-01 |
| <i>A_24_P560332</i>    | -1,00 | 9,47E-01 | 9,81E-01 |
| <i>MST1</i>            | -1,00 | 9,47E-01 | 9,81E-01 |
| <i>AF318328</i>        | -1,00 | 9,47E-01 | 9,81E-01 |
| <i>OR4C1P</i>          | 1,00  | 9,47E-01 | 9,81E-01 |
| <i>C1orf87</i>         | 1,00  | 9,46E-01 | 9,81E-01 |
| <i>ANGPTL1</i>         | 1,04  | 9,46E-01 | 9,81E-01 |
| <i>ARHGAP11A</i>       | 1,00  | 9,47E-01 | 9,81E-01 |
| <i>A_23_P10525</i>     | 1,00  | 9,47E-01 | 9,81E-01 |
| <i>LOC196913</i>       | 1,00  | 9,47E-01 | 9,81E-01 |
| <i>THC2342207</i>      | 1,00  | 9,47E-01 | 9,81E-01 |
| <i>T05214</i>          | 1,00  | 9,47E-01 | 9,81E-01 |
| <i>FUT7</i>            | -1,01 | 9,47E-01 | 9,81E-01 |
| <i>A_24_P911519</i>    | -1,01 | 9,47E-01 | 9,81E-01 |
| <i>BX444107</i>        | 1,00  | 9,47E-01 | 9,81E-01 |
| <i>THC2341174</i>      | 1,00  | 9,47E-01 | 9,81E-01 |
| <i>MYH4</i>            | 1,00  | 9,47E-01 | 9,81E-01 |
| <i>CYorf14</i>         | 1,00  | 9,47E-01 | 9,81E-01 |

|                        |       |          |          |
|------------------------|-------|----------|----------|
| <i>AI652796</i>        | 1,00  | 9,47E-01 | 9,81E-01 |
| <i>MRPL38</i>          | 1,00  | 9,47E-01 | 9,81E-01 |
| <i>NP283818</i>        | 1,00  | 9,47E-01 | 9,81E-01 |
| <i>DOC2A</i>           | 1,00  | 9,47E-01 | 9,81E-01 |
| <i>C11orf76</i>        | 1,00  | 9,47E-01 | 9,81E-01 |
| <i>CENPA</i>           | 1,00  | 9,47E-01 | 9,81E-01 |
| <i>TMCO2</i>           | 1,00  | 9,47E-01 | 9,81E-01 |
| <i>SLC16A13</i>        | 1,00  | 9,47E-01 | 9,81E-01 |
| <i>ENST00000371291</i> | 1,01  | 9,47E-01 | 9,81E-01 |
| <i>CR600291</i>        | 1,00  | 9,48E-01 | 9,81E-01 |
| <i>C15orf40</i>        | 1,00  | 9,48E-01 | 9,81E-01 |
| <i>THC2460213</i>      | 1,00  | 9,48E-01 | 9,81E-01 |
| <i>C6orf71</i>         | 1,00  | 9,48E-01 | 9,81E-01 |
| <i>SMARCD1</i>         | 1,00  | 9,48E-01 | 9,81E-01 |
| <i>AK021843</i>        | 1,00  | 9,48E-01 | 9,81E-01 |
| <i>CMTM2</i>           | -1,01 | 9,48E-01 | 9,81E-01 |
| <i>A_24_P881608</i>    | 1,00  | 9,48E-01 | 9,81E-01 |
| <i>CHST9</i>           | 1,00  | 9,48E-01 | 9,81E-01 |
| <i>A_24_P118382</i>    | -1,01 | 9,48E-01 | 9,81E-01 |
| <i>THC2319894</i>      | -1,01 | 9,49E-01 | 9,81E-01 |
| <i>A_24_P264573</i>    | -1,01 | 9,48E-01 | 9,81E-01 |
| <i>ZNF217</i>          | -1,00 | 9,48E-01 | 9,81E-01 |
| <i>A_24_P127192</i>    | -1,00 | 9,48E-01 | 9,81E-01 |
| <i>ZFP3</i>            | -1,00 | 9,48E-01 | 9,81E-01 |
| <i>PTPLAD1</i>         | -1,00 | 9,48E-01 | 9,81E-01 |
| <i>TNFAIP8L1</i>       | 1,00  | 9,49E-01 | 9,81E-01 |
| <i>AF161337</i>        | 1,00  | 9,49E-01 | 9,81E-01 |
| <i>CR611723</i>        | 1,00  | 9,48E-01 | 9,81E-01 |
| <i>A_24_P936057</i>    | 1,00  | 9,48E-01 | 9,81E-01 |
| <i>C1orf210</i>        | 1,00  | 9,48E-01 | 9,81E-01 |
| <i>DUX3</i>            | 1,00  | 9,48E-01 | 9,81E-01 |
| <i>BRD7</i>            | 1,00  | 9,49E-01 | 9,81E-01 |
| <i>SMARCC2</i>         | 1,00  | 9,48E-01 | 9,81E-01 |
| <i>A_24_P684274</i>    | 1,00  | 9,48E-01 | 9,81E-01 |
| <i>DNAJC4</i>          | 1,00  | 9,48E-01 | 9,81E-01 |
| <i>PSMA1</i>           | 1,00  | 9,48E-01 | 9,81E-01 |
| <i>IQWD1</i>           | 1,00  | 9,49E-01 | 9,81E-01 |
| <i>DB380247</i>        | 1,00  | 9,48E-01 | 9,81E-01 |
| <i>A_32_P192354</i>    | 1,00  | 9,48E-01 | 9,81E-01 |
| <i>EBF2</i>            | 1,00  | 9,48E-01 | 9,81E-01 |
| <i>IL18</i>            | 1,01  | 9,48E-01 | 9,81E-01 |
| <i>OFCC1</i>           | 1,01  | 9,48E-01 | 9,81E-01 |
| <i>BAGE</i>            | 1,00  | 9,49E-01 | 9,81E-01 |
| <i>THC2437580</i>      | 1,00  | 9,49E-01 | 9,81E-01 |

|                 |       |          |          |
|-----------------|-------|----------|----------|
| AA887631        | -1,01 | 9,49E-01 | 9,81E-01 |
| STK38           | 1,00  | 9,49E-01 | 9,81E-01 |
| ZNF525          | 1,00  | 9,49E-01 | 9,81E-01 |
| THC2296085      | 1,00  | 9,49E-01 | 9,81E-01 |
| BC032901        | 1,00  | 9,49E-01 | 9,81E-01 |
| KPNA1           | 1,00  | 9,49E-01 | 9,81E-01 |
| E2F6            | -1,03 | 9,49E-01 | 9,81E-01 |
| ENST00000308118 | -1,01 | 9,49E-01 | 9,81E-01 |
| APOA1           | 1,00  | 9,49E-01 | 9,81E-01 |
| RAD54L2         | 1,00  | 9,49E-01 | 9,81E-01 |
| THC2364378      | 1,00  | 9,49E-01 | 9,81E-01 |
| CRABP2          | -1,01 | 9,49E-01 | 9,81E-01 |
| AK055101        | -1,01 | 9,50E-01 | 9,81E-01 |
| CTAG2           | -1,01 | 9,50E-01 | 9,81E-01 |
| AF339813        | -1,01 | 9,50E-01 | 9,81E-01 |
| KPNA2           | -1,00 | 9,50E-01 | 9,81E-01 |
| A_24_P903715    | 1,00  | 9,49E-01 | 9,81E-01 |
| KLC4            | 1,00  | 9,50E-01 | 9,81E-01 |
| THC2264965      | 1,00  | 9,50E-01 | 9,81E-01 |
| CR608347        | 1,00  | 9,50E-01 | 9,81E-01 |
| SLC15A1         | 1,00  | 9,50E-01 | 9,81E-01 |
| ENST00000357954 | 1,00  | 9,50E-01 | 9,81E-01 |
| CES7            | 1,00  | 9,50E-01 | 9,81E-01 |
| TBRG1           | 1,00  | 9,49E-01 | 9,81E-01 |
| BE535360        | 1,00  | 9,50E-01 | 9,81E-01 |
| CCL27           | 1,00  | 9,50E-01 | 9,81E-01 |
| RNUXA           | 1,00  | 9,50E-01 | 9,81E-01 |
| A_24_P255303    | 1,00  | 9,50E-01 | 9,81E-01 |
| FKBP9           | 1,00  | 9,50E-01 | 9,81E-01 |
| DUSP6           | 1,00  | 9,50E-01 | 9,81E-01 |
| A_24_P383569    | 1,01  | 9,50E-01 | 9,81E-01 |
| HIST1H2AL       | 1,00  | 9,50E-01 | 9,81E-01 |
| CN284574        | 1,00  | 9,50E-01 | 9,81E-01 |
| AA678491        | 1,00  | 9,50E-01 | 9,81E-01 |
| CN358250        | 1,00  | 9,50E-01 | 9,81E-01 |
| A_32_P20717     | 1,01  | 9,50E-01 | 9,81E-01 |
| LCE2D           | 1,00  | 9,50E-01 | 9,81E-01 |
| PSMA4           | 1,00  | 9,50E-01 | 9,81E-01 |
| THC2314906      | -1,00 | 9,50E-01 | 9,81E-01 |
| A_24_P685995    | 1,01  | 9,50E-01 | 9,81E-01 |
| SIAE            | 1,00  | 9,51E-01 | 9,81E-01 |
| ENST00000278654 | 1,01  | 9,51E-01 | 9,81E-01 |
| THC2312236      | 1,00  | 9,51E-01 | 9,82E-01 |
| ROD1            | 1,00  | 9,51E-01 | 9,82E-01 |

|                        |       |          |          |
|------------------------|-------|----------|----------|
| <i>ENST00000304245</i> | 1,00  | 9,51E-01 | 9,82E-01 |
| <i>ENST00000342548</i> | 1,00  | 9,51E-01 | 9,82E-01 |
| <i>KLB</i>             | 1,00  | 9,51E-01 | 9,82E-01 |
| <i>AK124776</i>        | 1,00  | 9,51E-01 | 9,82E-01 |
| <i>ENST00000272907</i> | 1,00  | 9,51E-01 | 9,82E-01 |
| <i>OLFM1</i>           | 1,00  | 9,51E-01 | 9,82E-01 |
| <i>TPTEps1</i>         | 1,00  | 9,51E-01 | 9,82E-01 |
| <i>KCNK10</i>          | 1,00  | 9,51E-01 | 9,82E-01 |
| <i>EIF2AK2</i>         | 1,00  | 9,51E-01 | 9,82E-01 |
| <i>WFDC8</i>           | 1,00  | 9,51E-01 | 9,82E-01 |
| <i>METTL9</i>          | 1,00  | 9,51E-01 | 9,82E-01 |
| <i>THC2280539</i>      | 1,00  | 9,51E-01 | 9,82E-01 |
| <i>CDH1</i>            | -1,01 | 9,52E-01 | 9,82E-01 |
| <i>LDOC1</i>           | -1,00 | 9,52E-01 | 9,82E-01 |
| <i>OGFR</i>            | 1,00  | 9,52E-01 | 9,82E-01 |
| <i>A_32_P232647</i>    | 1,00  | 9,52E-01 | 9,82E-01 |
| <i>PSME3</i>           | 1,00  | 9,52E-01 | 9,82E-01 |
| <i>HKDC1</i>           | 1,00  | 9,51E-01 | 9,82E-01 |
| <i>A_24_P530900</i>    | 1,00  | 9,52E-01 | 9,82E-01 |
| <i>A_32_P62137</i>     | 1,00  | 9,52E-01 | 9,82E-01 |
| <i>MARS2</i>           | 1,00  | 9,52E-01 | 9,82E-01 |
| <i>ALKBH7</i>          | 1,00  | 9,52E-01 | 9,82E-01 |
| <i>ENST00000238576</i> | 1,00  | 9,52E-01 | 9,82E-01 |
| <i>C1orf135</i>        | 1,00  | 9,52E-01 | 9,82E-01 |
| <i>NF2</i>             | 1,00  | 9,52E-01 | 9,82E-01 |
| <i>VTI1A</i>           | 1,00  | 9,52E-01 | 9,82E-01 |
| <i>PCDHGA3</i>         | 1,00  | 9,52E-01 | 9,82E-01 |
| <i>DB041606</i>        | 1,00  | 9,52E-01 | 9,82E-01 |
| <i>MS4A3</i>           | 1,00  | 9,52E-01 | 9,82E-01 |
| <i>THC2454615</i>      | 1,00  | 9,52E-01 | 9,82E-01 |
| <i>THC2439761</i>      | 1,00  | 9,52E-01 | 9,82E-01 |
| <i>AI814116</i>        | 1,00  | 9,52E-01 | 9,82E-01 |
| <i>SLC43A2</i>         | 1,00  | 9,52E-01 | 9,82E-01 |
| <i>WDR40B</i>          | 1,00  | 9,52E-01 | 9,82E-01 |
| <i>A_24_P409560</i>    | 1,01  | 9,52E-01 | 9,82E-01 |
| <i>UNQ467</i>          | 1,04  | 9,52E-01 | 9,82E-01 |
| <i>BF879636</i>        | 1,00  | 9,52E-01 | 9,82E-01 |
| <i>CB052914</i>        | 1,00  | 9,52E-01 | 9,82E-01 |
| <i>CDX2</i>            | 1,00  | 9,52E-01 | 9,82E-01 |
| <i>C1orf127</i>        | 1,00  | 9,52E-01 | 9,82E-01 |
| <i>SLC39A7</i>         | 1,01  | 9,53E-01 | 9,82E-01 |
| <i>A_24_P941040</i>    | 1,00  | 9,53E-01 | 9,82E-01 |
| <i>AK057704</i>        | 1,00  | 9,53E-01 | 9,82E-01 |
| <i>CCDC28A</i>         | -1,00 | 9,53E-01 | 9,82E-01 |

|                        |       |          |          |
|------------------------|-------|----------|----------|
| <i>C10orf25</i>        | 1,00  | 9,53E-01 | 9,82E-01 |
| <i>NACAP1</i>          | -1,01 | 9,53E-01 | 9,82E-01 |
| <i>PLXNC1</i>          | -1,00 | 9,53E-01 | 9,82E-01 |
| <i>UCHL3</i>           | 1,00  | 9,53E-01 | 9,82E-01 |
| <i>MECP2</i>           | 1,00  | 9,53E-01 | 9,82E-01 |
| <i>BC042517</i>        | 1,00  | 9,53E-01 | 9,82E-01 |
| <i>PDHX</i>            | 1,00  | 9,53E-01 | 9,82E-01 |
| <i>QTRT1</i>           | 1,00  | 9,53E-01 | 9,82E-01 |
| <i>A_23_P213468</i>    | 1,00  | 9,53E-01 | 9,82E-01 |
| <i>SF3B2</i>           | 1,00  | 9,53E-01 | 9,82E-01 |
| <i>BC047326</i>        | 1,00  | 9,53E-01 | 9,82E-01 |
| <i>LOC284912</i>       | 1,00  | 9,53E-01 | 9,82E-01 |
| <i>PAX4</i>            | 1,00  | 9,53E-01 | 9,82E-01 |
| <i>SGK3</i>            | 1,00  | 9,53E-01 | 9,82E-01 |
| <i>TBX2</i>            | 1,01  | 9,53E-01 | 9,82E-01 |
| <i>ENST00000361855</i> | -1,01 | 9,53E-01 | 9,82E-01 |
| <i>MGC52498</i>        | 1,00  | 9,53E-01 | 9,82E-01 |
| <i>C4orf25</i>         | -1,01 | 9,54E-01 | 9,82E-01 |
| <i>A_24_P940354</i>    | 1,00  | 9,54E-01 | 9,82E-01 |
| <i>GGPS1</i>           | 1,00  | 9,54E-01 | 9,82E-01 |
| <i>THC2402646</i>      | 1,00  | 9,54E-01 | 9,82E-01 |
| <i>TTYT8</i>           | 1,00  | 9,54E-01 | 9,82E-01 |
| <i>SCN4B</i>           | 1,00  | 9,54E-01 | 9,82E-01 |
| <i>THC2378360</i>      | 1,00  | 9,54E-01 | 9,83E-01 |
| <i>NEUROD4</i>         | 1,00  | 9,54E-01 | 9,83E-01 |
| <i>VPS16</i>           | 1,00  | 9,54E-01 | 9,83E-01 |
| <i>THC2279230</i>      | 1,00  | 9,54E-01 | 9,83E-01 |
| <i>OR11G2</i>          | 1,00  | 9,54E-01 | 9,83E-01 |
| <i>THC2281731</i>      | 1,00  | 9,54E-01 | 9,83E-01 |
| <i>C1orf67</i>         | 1,00  | 9,54E-01 | 9,83E-01 |
| <i>DGKB</i>            | 1,01  | 9,54E-01 | 9,83E-01 |
| <i>A_24_P297302</i>    | 1,00  | 9,54E-01 | 9,83E-01 |
| <i>AK098160</i>        | 1,00  | 9,54E-01 | 9,83E-01 |
| <i>BC032027</i>        | 1,00  | 9,54E-01 | 9,83E-01 |
| <i>AF274934</i>        | 1,00  | 9,54E-01 | 9,83E-01 |
| <i>CHIT1</i>           | 1,00  | 9,54E-01 | 9,83E-01 |
| <i>THC2435420</i>      | 1,00  | 9,54E-01 | 9,83E-01 |
| <i>CDS1</i>            | 1,00  | 9,54E-01 | 9,83E-01 |
| <i>SPRR2D</i>          | -1,03 | 9,54E-01 | 9,83E-01 |
| <i>AF527623</i>        | 1,00  | 9,54E-01 | 9,83E-01 |
| <i>BIC</i>             | 1,00  | 9,54E-01 | 9,83E-01 |
| <i>MICB</i>            | 1,00  | 9,55E-01 | 9,83E-01 |
| <i>LOC220115</i>       | 1,00  | 9,55E-01 | 9,83E-01 |
| <i>A_24_P366768</i>    | 1,01  | 9,55E-01 | 9,83E-01 |

|                        |       |          |          |
|------------------------|-------|----------|----------|
| <i>BC113121</i>        | -1,00 | 9,55E-01 | 9,83E-01 |
| <i>EMG1</i>            | 1,00  | 9,55E-01 | 9,83E-01 |
| <i>D16474</i>          | 1,00  | 9,55E-01 | 9,83E-01 |
| <i>A_24_P651859</i>    | 1,00  | 9,55E-01 | 9,83E-01 |
| <i>RSAD2</i>           | -1,01 | 9,55E-01 | 9,83E-01 |
| <i>A_24_P290046</i>    | 1,00  | 9,55E-01 | 9,83E-01 |
| <i>ENST00000340158</i> | 1,00  | 9,55E-01 | 9,83E-01 |
| <i>UMODL1</i>          | 1,00  | 9,55E-01 | 9,83E-01 |
| <i>RXFP1</i>           | -1,00 | 9,55E-01 | 9,83E-01 |
| <i>A_32_P145241</i>    | 1,00  | 9,55E-01 | 9,83E-01 |
| <i>NP239955</i>        | 1,00  | 9,55E-01 | 9,83E-01 |
| <i>GNG5</i>            | 1,00  | 9,55E-01 | 9,83E-01 |
| <i>A_24_P32708</i>     | -1,01 | 9,56E-01 | 9,83E-01 |
| <i>IL3</i>             | 1,00  | 9,56E-01 | 9,83E-01 |
| <i>RGMB</i>            | 1,00  | 9,56E-01 | 9,83E-01 |
| <i>SPRN</i>            | 1,02  | 9,56E-01 | 9,83E-01 |
| <i>CR605947</i>        | -1,01 | 9,56E-01 | 9,83E-01 |
| <i>MCRS1</i>           | 1,00  | 9,56E-01 | 9,83E-01 |
| <i>ECEL1</i>           | 1,00  | 9,56E-01 | 9,83E-01 |
| <i>ENST00000302001</i> | 1,02  | 9,56E-01 | 9,84E-01 |
| <i>OR1F2</i>           | 1,00  | 9,56E-01 | 9,84E-01 |
| <i>PHF16</i>           | 1,00  | 9,56E-01 | 9,84E-01 |
| <i>A_24_P943986</i>    | 1,00  | 9,56E-01 | 9,84E-01 |
| <i>NEK6</i>            | -1,00 | 9,57E-01 | 9,84E-01 |
| <i>KIAA1456</i>        | -1,00 | 9,56E-01 | 9,84E-01 |
| <i>C14orf166</i>       | 1,00  | 9,57E-01 | 9,84E-01 |
| <i>37226</i>           | 1,00  | 9,56E-01 | 9,84E-01 |
| <i>THC2386446</i>      | 1,00  | 9,56E-01 | 9,84E-01 |
| <i>TSPYL2</i>          | 1,00  | 9,57E-01 | 9,84E-01 |
| <i>DKFZp313A2432</i>   | 1,00  | 9,57E-01 | 9,84E-01 |
| <i>TDRD9</i>           | 1,00  | 9,57E-01 | 9,84E-01 |
| <i>AT_ssH_AB_3</i>     | 1,01  | 9,56E-01 | 9,84E-01 |
| <i>MTR</i>             | 1,00  | 9,57E-01 | 9,84E-01 |
| <i>ENST00000308537</i> | 1,00  | 9,57E-01 | 9,84E-01 |
| <i>KIAA2002</i>        | 1,00  | 9,57E-01 | 9,84E-01 |
| <i>THC2392835</i>      | 1,00  | 9,57E-01 | 9,84E-01 |
| <i>AK022339</i>        | 1,00  | 9,57E-01 | 9,84E-01 |
| <i>THC2401428</i>      | 1,00  | 9,57E-01 | 9,84E-01 |
| <i>DB318193</i>        | 1,00  | 9,57E-01 | 9,84E-01 |
| <i>A_23_P28397</i>     | 1,00  | 9,57E-01 | 9,84E-01 |
| <i>CR601823</i>        | 1,00  | 9,57E-01 | 9,84E-01 |
| <i>CEI</i>             | 1,00  | 9,57E-01 | 9,84E-01 |
| <i>THC2379275</i>      | 1,00  | 9,57E-01 | 9,84E-01 |
| <i>MRPS16</i>          | 1,00  | 9,57E-01 | 9,84E-01 |



|                        |       |          |          |
|------------------------|-------|----------|----------|
| <i>THC2294909</i>      | 1,00  | 9,57E-01 | 9,84E-01 |
| <i>A_24_P289984</i>    | 1,01  | 9,58E-01 | 9,84E-01 |
| <i>RAB39B</i>          | 1,00  | 9,58E-01 | 9,84E-01 |
| <i>AI859463</i>        | 1,00  | 9,58E-01 | 9,84E-01 |
| <i>C17orf62</i>        | 1,00  | 9,58E-01 | 9,84E-01 |
| <i>VSNL1</i>           | 1,01  | 9,58E-01 | 9,84E-01 |
| <i>THEM2</i>           | 1,00  | 9,58E-01 | 9,84E-01 |
| <i>A_24_P375751</i>    | 1,00  | 9,58E-01 | 9,84E-01 |
| <i>BLR1</i>            | 1,00  | 9,58E-01 | 9,84E-01 |
| <i>A_32_P141849</i>    | 1,00  | 9,58E-01 | 9,84E-01 |
| <i>AK125697</i>        | 1,00  | 9,58E-01 | 9,84E-01 |
| <i>LOC645161</i>       | 1,01  | 9,58E-01 | 9,84E-01 |
| <i>AA399656</i>        | 1,00  | 9,58E-01 | 9,84E-01 |
| <i>CR621923</i>        | 1,00  | 9,58E-01 | 9,85E-01 |
| <i>BC015836</i>        | 1,00  | 9,58E-01 | 9,85E-01 |
| <i>AA856716</i>        | 1,00  | 9,58E-01 | 9,85E-01 |
| <i>ZNF618</i>          | 1,00  | 9,58E-01 | 9,85E-01 |
| <i>AI042062</i>        | 1,00  | 9,58E-01 | 9,85E-01 |
| <i>HLA-H</i>           | 1,00  | 9,59E-01 | 9,85E-01 |
| <i>ENST00000374390</i> | 1,00  | 9,59E-01 | 9,85E-01 |
| <i>LOC339894</i>       | 1,00  | 9,59E-01 | 9,85E-01 |
| <i>AU146536</i>        | 1,00  | 9,59E-01 | 9,85E-01 |
| <i>USP20</i>           | 1,00  | 9,59E-01 | 9,85E-01 |
| <i>ZNF294</i>          | 1,00  | 9,59E-01 | 9,85E-01 |
| <i>DHDDS</i>           | 1,00  | 9,59E-01 | 9,85E-01 |
| <i>DBP</i>             | 1,00  | 9,59E-01 | 9,85E-01 |
| <i>A_32_P109876</i>    | 1,00  | 9,59E-01 | 9,85E-01 |
| <i>A_24_P135551</i>    | 1,01  | 9,59E-01 | 9,85E-01 |
| <i>BCAR3</i>           | 1,00  | 9,59E-01 | 9,85E-01 |
| <i>SERPINB4</i>        | -1,03 | 9,59E-01 | 9,85E-01 |
| <i>C9orf144</i>        | 1,00  | 9,59E-01 | 9,85E-01 |
| <i>IQGAP1</i>          | 1,00  | 9,59E-01 | 9,85E-01 |
| <i>AL514561</i>        | 1,00  | 9,59E-01 | 9,85E-01 |
| <i>A_32_P212598</i>    | 1,00  | 9,59E-01 | 9,85E-01 |
| <i>ENST00000298858</i> | 1,00  | 9,59E-01 | 9,85E-01 |
| <i>NOL6</i>            | 1,00  | 9,59E-01 | 9,85E-01 |
| <i>BM692484</i>        | -1,01 | 9,59E-01 | 9,85E-01 |
| <i>SLC39A11</i>        | 1,00  | 9,59E-01 | 9,85E-01 |
| <i>AA725860</i>        | 1,00  | 9,59E-01 | 9,85E-01 |
| <i>ENST00000308269</i> | -1,01 | 9,60E-01 | 9,85E-01 |
| <i>CCNB2</i>           | 1,00  | 9,60E-01 | 9,85E-01 |
| <i>TNP1</i>            | 1,00  | 9,60E-01 | 9,85E-01 |
| <i>MRPL21</i>          | 1,00  | 9,60E-01 | 9,85E-01 |
| <i>C10orf89</i>        | 1,00  | 9,60E-01 | 9,85E-01 |

|                        |      |          |          |
|------------------------|------|----------|----------|
| <i>PTF1A</i>           | 1,00 | 9,60E-01 | 9,85E-01 |
| <i>AK024035</i>        | 1,00 | 9,60E-01 | 9,85E-01 |
| <i>A_24_P938475</i>    | 1,00 | 9,60E-01 | 9,85E-01 |
| <i>ENST00000373542</i> | 1,00 | 9,60E-01 | 9,85E-01 |
| <i>ENST00000332415</i> | 1,00 | 9,60E-01 | 9,85E-01 |
| <i>RGS19</i>           | 1,00 | 9,60E-01 | 9,85E-01 |
| <i>DACT1</i>           | 1,00 | 9,60E-01 | 9,85E-01 |
| <i>A_24_P777388</i>    | 1,00 | 9,60E-01 | 9,85E-01 |
| <i>MCHR2</i>           | 1,00 | 9,60E-01 | 9,85E-01 |
| <i>A_23_P9509</i>      | 1,00 | 9,60E-01 | 9,85E-01 |
| <i>AK093277</i>        | 1,01 | 9,60E-01 | 9,85E-01 |
| <i>A_32_P725839</i>    | 1,01 | 9,60E-01 | 9,85E-01 |
| <i>SAE1</i>            | 1,00 | 9,61E-01 | 9,85E-01 |
| <i>SCNN1B</i>          | 1,00 | 9,61E-01 | 9,85E-01 |
| <i>AF118064</i>        | 1,00 | 9,61E-01 | 9,85E-01 |
| <i>A_24_P499215</i>    | 1,00 | 9,61E-01 | 9,85E-01 |
| <i>SSPO</i>            | 1,00 | 9,61E-01 | 9,85E-01 |
| <i>HLA-DRB6</i>        | 1,01 | 9,61E-01 | 9,85E-01 |
| <i>CHRM1</i>           | 1,00 | 9,61E-01 | 9,86E-01 |
| <i>DRAP1</i>           | 1,00 | 9,61E-01 | 9,86E-01 |
| <i>GTF2H4</i>          | 1,00 | 9,61E-01 | 9,86E-01 |
| <i>AK023663</i>        | 1,00 | 9,61E-01 | 9,86E-01 |
| <i>ENST00000375672</i> | 1,00 | 9,61E-01 | 9,86E-01 |
| <i>A_24_P931157</i>    | 1,00 | 9,61E-01 | 9,86E-01 |
| <i>ENST00000295943</i> | 1,00 | 9,61E-01 | 9,86E-01 |
| <i>TSPYL6</i>          | 1,00 | 9,61E-01 | 9,86E-01 |
| <i>A_24_P919706</i>    | 1,00 | 9,61E-01 | 9,86E-01 |
| <i>OR8H1</i>           | 1,00 | 9,61E-01 | 9,86E-01 |
| <i>AF116621</i>        | 1,00 | 9,62E-01 | 9,86E-01 |
| <i>MGC4771</i>         | 1,00 | 9,62E-01 | 9,86E-01 |
| <i>GABRG2</i>          | 1,00 | 9,62E-01 | 9,86E-01 |
| <i>KRTAP1-5</i>        | 1,01 | 9,62E-01 | 9,86E-01 |
| <i>AF130117</i>        | 1,00 | 9,62E-01 | 9,86E-01 |
| <i>BRUNOL5</i>         | 1,00 | 9,62E-01 | 9,86E-01 |
| <i>HCK</i>             | 1,00 | 9,62E-01 | 9,86E-01 |
| <i>TCN1</i>            | 1,00 | 9,62E-01 | 9,86E-01 |
| <i>CD63</i>            | 1,00 | 9,62E-01 | 9,86E-01 |
| <i>CHFR</i>            | 1,00 | 9,62E-01 | 9,86E-01 |
| <i>TBXA2R</i>          | 1,00 | 9,62E-01 | 9,86E-01 |
| <i>ALS2CR12</i>        | 1,00 | 9,62E-01 | 9,86E-01 |
| <i>GSTP1</i>           | 1,00 | 9,62E-01 | 9,86E-01 |
| <i>BM563971</i>        | 1,00 | 9,62E-01 | 9,86E-01 |
| <i>C14orf8</i>         | 1,00 | 9,62E-01 | 9,86E-01 |
| <i>UGT2B17</i>         | 1,00 | 9,62E-01 | 9,86E-01 |

|                        |       |          |          |
|------------------------|-------|----------|----------|
| <i>AK096803</i>        | 1,00  | 9,62E-01 | 9,86E-01 |
| <i>A_24_P934826</i>    | 1,00  | 9,62E-01 | 9,86E-01 |
| <i>NLGN3</i>           | 1,00  | 9,62E-01 | 9,86E-01 |
| <i>GNA14</i>           | 1,00  | 9,62E-01 | 9,86E-01 |
| <i>AK023660</i>        | 1,00  | 9,62E-01 | 9,86E-01 |
| <i>RBP2</i>            | 1,00  | 9,63E-01 | 9,86E-01 |
| <i>THC2286962</i>      | 1,00  | 9,63E-01 | 9,86E-01 |
| <i>ENST00000378624</i> | 1,00  | 9,63E-01 | 9,86E-01 |
| <i>AK096806</i>        | 1,00  | 9,63E-01 | 9,86E-01 |
| <i>CX36</i>            | 1,00  | 9,63E-01 | 9,86E-01 |
| <i>AF130051</i>        | 1,00  | 9,63E-01 | 9,86E-01 |
| <i>BC034299</i>        | 1,00  | 9,63E-01 | 9,86E-01 |
| <i>SEC22C</i>          | 1,00  | 9,63E-01 | 9,86E-01 |
| <i>NBEA</i>            | 1,00  | 9,63E-01 | 9,86E-01 |
| <i>MSRB2</i>           | 1,00  | 9,63E-01 | 9,86E-01 |
| <i>M6PRBP1</i>         | 1,00  | 9,63E-01 | 9,86E-01 |
| <i>BF089603</i>        | 1,00  | 9,63E-01 | 9,87E-01 |
| <i>SDCBP2</i>          | 1,00  | 9,63E-01 | 9,87E-01 |
| <i>ADAM28</i>          | 1,00  | 9,63E-01 | 9,87E-01 |
| <i>GPR52</i>           | 1,00  | 9,63E-01 | 9,87E-01 |
| <i>ENST00000311218</i> | 1,00  | 9,63E-01 | 9,87E-01 |
| <i>THC2364440</i>      | 1,00  | 9,63E-01 | 9,87E-01 |
| <i>A_24_P761386</i>    | 1,00  | 9,64E-01 | 9,87E-01 |
| <i>MRPS9</i>           | 1,00  | 9,64E-01 | 9,87E-01 |
| <i>EIF3S9</i>          | 1,00  | 9,64E-01 | 9,87E-01 |
| <i>ENST00000375207</i> | 1,00  | 9,64E-01 | 9,87E-01 |
| <i>40057</i>           | 1,00  | 9,64E-01 | 9,87E-01 |
| <i>X15674</i>          | 1,00  | 9,64E-01 | 9,87E-01 |
| <i>DOK2</i>            | 1,00  | 9,64E-01 | 9,87E-01 |
| <i>GJB5</i>            | 1,00  | 9,64E-01 | 9,87E-01 |
| <i>CYP2W1</i>          | 1,00  | 9,64E-01 | 9,87E-01 |
| <i>MGC87631</i>        | -1,01 | 9,64E-01 | 9,87E-01 |
| <i>AF232217</i>        | 1,00  | 9,64E-01 | 9,87E-01 |
| <i>A_24_P144487</i>    | 1,00  | 9,64E-01 | 9,87E-01 |
| <i>LGALS14</i>         | 1,00  | 9,64E-01 | 9,87E-01 |
| <i>L26054</i>          | 1,00  | 9,64E-01 | 9,87E-01 |
| <i>AK058065</i>        | 1,00  | 9,64E-01 | 9,87E-01 |
| <i>A_24_P392842</i>    | 1,00  | 9,64E-01 | 9,87E-01 |
| <i>THC2280372</i>      | 1,00  | 9,64E-01 | 9,87E-01 |
| <i>PTCH2</i>           | 1,00  | 9,64E-01 | 9,87E-01 |
| <i>CSRP1</i>           | -1,01 | 9,64E-01 | 9,87E-01 |
| <i>S100A16</i>         | 1,00  | 9,64E-01 | 9,87E-01 |
| <i>C1orf21</i>         | 1,00  | 9,64E-01 | 9,87E-01 |
| <i>HSMPP8</i>          | 1,00  | 9,64E-01 | 9,87E-01 |

|                     |       |          |          |
|---------------------|-------|----------|----------|
| <i>NUDCD3</i>       | 1,00  | 9,64E-01 | 9,87E-01 |
| <i>FGF17</i>        | 1,00  | 9,64E-01 | 9,87E-01 |
| <i>DB352368</i>     | 1,00  | 9,64E-01 | 9,87E-01 |
| <i>THC2380237</i>   | 1,00  | 9,65E-01 | 9,87E-01 |
| <i>LOC645676</i>    | 1,00  | 9,65E-01 | 9,87E-01 |
| <i>STRN4</i>        | 1,00  | 9,65E-01 | 9,87E-01 |
| <i>A_24_P101271</i> | -1,01 | 9,65E-01 | 9,87E-01 |
| <i>LOC63928</i>     | -1,00 | 9,65E-01 | 9,87E-01 |
| <i>A_24_P924552</i> | 1,00  | 9,65E-01 | 9,87E-01 |
| <i>ARL2BP</i>       | 1,00  | 9,65E-01 | 9,87E-01 |
| <i>A_24_P918592</i> | 1,00  | 9,65E-01 | 9,87E-01 |
| <i>A_32_P223675</i> | 1,00  | 9,65E-01 | 9,87E-01 |
| <i>AK3</i>          | 1,00  | 9,65E-01 | 9,87E-01 |
| <i>THC2279782</i>   | 1,00  | 9,65E-01 | 9,87E-01 |
| <i>STK31</i>        | 1,00  | 9,65E-01 | 9,87E-01 |
| <i>MAGEA8</i>       | 1,00  | 9,65E-01 | 9,87E-01 |
| <i>AK05416</i>      | 1,00  | 9,65E-01 | 9,87E-01 |
| <i>EDN1</i>         | -1,01 | 9,65E-01 | 9,87E-01 |
| <i>AF060170</i>     | 1,00  | 9,65E-01 | 9,87E-01 |
| <i>EGFR</i>         | 1,00  | 9,65E-01 | 9,87E-01 |
| <i>PSMA3</i>        | 1,00  | 9,65E-01 | 9,87E-01 |
| <i>WDR7</i>         | 1,00  | 9,65E-01 | 9,87E-01 |
| <i>AF116659</i>     | 1,00  | 9,66E-01 | 9,87E-01 |
| <i>C6orf35</i>      | 1,00  | 9,66E-01 | 9,87E-01 |
| <i>A_24_P912396</i> | 1,00  | 9,65E-01 | 9,87E-01 |
| <i>DTNB</i>         | 1,00  | 9,65E-01 | 9,87E-01 |
| <i>TLR9</i>         | 1,00  | 9,65E-01 | 9,87E-01 |
| <i>ADRB3</i>        | 1,00  | 9,66E-01 | 9,87E-01 |
| <i>SRD5A1</i>       | 1,00  | 9,66E-01 | 9,87E-01 |
| <i>SYNJ1</i>        | 1,00  | 9,66E-01 | 9,87E-01 |
| <i>THC2399017</i>   | 1,00  | 9,66E-01 | 9,87E-01 |
| <i>THC2379807</i>   | 1,00  | 9,66E-01 | 9,88E-01 |
| <i>AF289570</i>     | 1,00  | 9,66E-01 | 9,88E-01 |
| <i>A_24_P736638</i> | 1,00  | 9,66E-01 | 9,88E-01 |
| <i>C14orf115</i>    | 1,00  | 9,66E-01 | 9,88E-01 |
| <i>NKX6-1</i>       | 1,00  | 9,66E-01 | 9,88E-01 |
| <i>UBE3A</i>        | 1,00  | 9,66E-01 | 9,88E-01 |
| <i>NALP9</i>        | 1,00  | 9,66E-01 | 9,88E-01 |
| <i>A_23_P32583</i>  | 1,00  | 9,66E-01 | 9,88E-01 |
| <i>A_24_P93321</i>  | 1,01  | 9,66E-01 | 9,88E-01 |
| <i>R88965</i>       | 1,00  | 9,66E-01 | 9,88E-01 |
| <i>AW440350</i>     | 1,00  | 9,66E-01 | 9,88E-01 |
| <i>ATAD3A</i>       | 1,00  | 9,66E-01 | 9,88E-01 |
| <i>BE795374</i>     | 1,00  | 9,67E-01 | 9,88E-01 |

|                        |       |          |          |
|------------------------|-------|----------|----------|
| <i>THC2339791</i>      | 1,00  | 9,67E-01 | 9,88E-01 |
| <i>ST3GAL3</i>         | 1,00  | 9,67E-01 | 9,88E-01 |
| <i>ENST00000309447</i> | 1,00  | 9,67E-01 | 9,88E-01 |
| <i>DERL2</i>           | 1,00  | 9,67E-01 | 9,88E-01 |
| <i>MMPL1</i>           | 1,00  | 9,67E-01 | 9,88E-01 |
| <i>DDX27</i>           | 1,00  | 9,67E-01 | 9,88E-01 |
| <i>AA628539</i>        | 1,00  | 9,67E-01 | 9,88E-01 |
| <i>A_24_P603453</i>    | 1,00  | 9,67E-01 | 9,88E-01 |
| <i>A_24_P298616</i>    | -1,01 | 9,67E-01 | 9,88E-01 |
| <i>ENST00000221899</i> | 1,00  | 9,67E-01 | 9,88E-01 |
| <i>A_24_P76319</i>     | 1,00  | 9,67E-01 | 9,88E-01 |
| <i>ARHGAP17</i>        | 1,00  | 9,67E-01 | 9,88E-01 |
| <i>FLJ25369</i>        | 1,00  | 9,67E-01 | 9,88E-01 |
| <i>IFT52</i>           | 1,00  | 9,67E-01 | 9,88E-01 |
| <i>PTGS1</i>           | -1,00 | 9,67E-01 | 9,88E-01 |
| <i>PLD4</i>            | 1,00  | 9,67E-01 | 9,88E-01 |
| <i>ENST00000299997</i> | 1,00  | 9,67E-01 | 9,88E-01 |
| <i>CCL4</i>            | 1,01  | 9,67E-01 | 9,88E-01 |
| <i>THC2274621</i>      | 1,00  | 9,68E-01 | 9,88E-01 |
| <i>PDLIM7</i>          | 1,00  | 9,68E-01 | 9,88E-01 |
| <i>AGPAT6</i>          | 1,00  | 9,68E-01 | 9,88E-01 |
| <i>UBP1</i>            | 1,00  | 9,68E-01 | 9,88E-01 |
| <i>A_24_P409830</i>    | 1,00  | 9,68E-01 | 9,88E-01 |
| <i>CDSN</i>            | 1,00  | 9,68E-01 | 9,88E-01 |
| <i>C9orf82</i>         | 1,00  | 9,68E-01 | 9,88E-01 |
| <i>SEMA3B</i>          | 1,00  | 9,68E-01 | 9,88E-01 |
| <i>PRKAG3</i>          | 1,01  | 9,68E-01 | 9,88E-01 |
| <i>BC030525</i>        | 1,00  | 9,68E-01 | 9,88E-01 |
| <i>TRIM37</i>          | 1,00  | 9,68E-01 | 9,88E-01 |
| <i>FXC1</i>            | 1,00  | 9,68E-01 | 9,88E-01 |
| <i>LOC150159</i>       | 1,00  | 9,68E-01 | 9,88E-01 |
| <i>SNX17</i>           | 1,00  | 9,68E-01 | 9,88E-01 |
| <i>THC2322443</i>      | 1,00  | 9,68E-01 | 9,88E-01 |
| <i>SERF2</i>           | 1,00  | 9,68E-01 | 9,88E-01 |
| <i>BC053669</i>        | 1,00  | 9,68E-01 | 9,88E-01 |
| <i>A_24_P932270</i>    | 1,00  | 9,68E-01 | 9,88E-01 |
| <i>AY358219</i>        | 1,00  | 9,68E-01 | 9,88E-01 |
| <i>C2orf14</i>         | 1,00  | 9,68E-01 | 9,88E-01 |
| <i>IRX6</i>            | 1,00  | 9,68E-01 | 9,88E-01 |
| <i>C18orf55</i>        | 1,00  | 9,68E-01 | 9,88E-01 |
| <i>C15orf43</i>        | 1,00  | 9,69E-01 | 9,88E-01 |
| <i>PLA2G2F</i>         | 1,00  | 9,69E-01 | 9,88E-01 |
| <i>THC2285905</i>      | 1,00  | 9,69E-01 | 9,88E-01 |
| <i>BX392861</i>        | 1,00  | 9,68E-01 | 9,88E-01 |

|                 |       |          |          |
|-----------------|-------|----------|----------|
| ZBTB26          | 1,00  | 9,69E-01 | 9,88E-01 |
| AF116655        | 1,00  | 9,69E-01 | 9,88E-01 |
| C14orf155       | 1,00  | 9,69E-01 | 9,88E-01 |
| APOL5           | 1,00  | 9,69E-01 | 9,88E-01 |
| BF059740        | 1,00  | 9,69E-01 | 9,88E-01 |
| MOBK2B          | 1,00  | 9,69E-01 | 9,88E-01 |
| LOC401052       | 1,00  | 9,69E-01 | 9,88E-01 |
| ECRG4           | -1,00 | 9,69E-01 | 9,88E-01 |
| THC2316063      | 1,00  | 9,69E-01 | 9,88E-01 |
| MT              | 1,01  | 9,69E-01 | 9,88E-01 |
| TCOF1           | 1,00  | 9,69E-01 | 9,89E-01 |
| LZTR1           | 1,00  | 9,69E-01 | 9,89E-01 |
| FTL             | 1,00  | 9,69E-01 | 9,89E-01 |
| DZIP1L          | 1,00  | 9,69E-01 | 9,89E-01 |
| RHOG            | 1,00  | 9,69E-01 | 9,89E-01 |
| TOP1            | 1,00  | 9,69E-01 | 9,89E-01 |
| A_24_P587621    | 1,00  | 9,69E-01 | 9,89E-01 |
| A_23_P253774    | 1,00  | 9,70E-01 | 9,89E-01 |
| FLJ21687        | 1,00  | 9,69E-01 | 9,89E-01 |
| THC2302056      | 1,00  | 9,70E-01 | 9,89E-01 |
| A_24_P470782    | 1,00  | 9,70E-01 | 9,89E-01 |
| FOXN1           | 1,00  | 9,70E-01 | 9,89E-01 |
| LAMP1           | 1,00  | 9,70E-01 | 9,89E-01 |
| ENST00000317427 | 1,00  | 9,70E-01 | 9,89E-01 |
| ZNF480          | 1,00  | 9,70E-01 | 9,89E-01 |
| THRAP6          | 1,00  | 9,70E-01 | 9,89E-01 |
| A_24_P556030    | 1,00  | 9,70E-01 | 9,89E-01 |
| OR12D2          | 1,00  | 9,70E-01 | 9,89E-01 |
| TXNRD2          | 1,00  | 9,70E-01 | 9,89E-01 |
| U50555          | 1,00  | 9,70E-01 | 9,89E-01 |
| TNNC1           | 1,00  | 9,70E-01 | 9,89E-01 |
| A_24_P493005    | 1,00  | 9,70E-01 | 9,89E-01 |
| MMP24           | 1,00  | 9,70E-01 | 9,89E-01 |
| BM677097        | 1,00  | 9,70E-01 | 9,89E-01 |
| A_24_P470809    | 1,00  | 9,70E-01 | 9,89E-01 |
| PFAAP5          | 1,00  | 9,70E-01 | 9,89E-01 |
| AW043836        | 1,00  | 9,70E-01 | 9,89E-01 |
| SC4MOL          | 1,00  | 9,70E-01 | 9,89E-01 |
| ENST00000366874 | 1,00  | 9,71E-01 | 9,89E-01 |
| CR626634        | -1,01 | 9,71E-01 | 9,89E-01 |
| A_23_P43744     | -1,00 | 9,71E-01 | 9,89E-01 |
| AF350419        | -1,00 | 9,71E-01 | 9,89E-01 |
| A_32_P214565    | 1,00  | 9,71E-01 | 9,89E-01 |
| AF088026        | 1,00  | 9,71E-01 | 9,89E-01 |

|                        |       |          |          |
|------------------------|-------|----------|----------|
| <i>LEO1</i>            | 1,00  | 9,71E-01 | 9,89E-01 |
| <i>TAF7</i>            | 1,00  | 9,71E-01 | 9,89E-01 |
| <i>LZTFL1</i>          | 1,00  | 9,71E-01 | 9,89E-01 |
| <i>RC10</i>            | 1,00  | 9,71E-01 | 9,89E-01 |
| <i>ZNHIT1</i>          | 1,00  | 9,71E-01 | 9,89E-01 |
| <i>FAM113A</i>         | 1,00  | 9,71E-01 | 9,89E-01 |
| <i>PPIE</i>            | 1,00  | 9,71E-01 | 9,89E-01 |
| <i>BCO11481</i>        | 1,00  | 9,71E-01 | 9,89E-01 |
| <i>IL1F6</i>           | 1,00  | 9,71E-01 | 9,89E-01 |
| <i>KRT38</i>           | 1,00  | 9,71E-01 | 9,89E-01 |
| <i>THC2277201</i>      | 1,00  | 9,71E-01 | 9,89E-01 |
| <i>LOC440350</i>       | 1,00  | 9,71E-01 | 9,89E-01 |
| <i>TEX101</i>          | 1,00  | 9,71E-01 | 9,89E-01 |
| <i>AK092744</i>        | 1,00  | 9,71E-01 | 9,89E-01 |
| <i>A_24_P505255</i>    | 1,00  | 9,71E-01 | 9,89E-01 |
| <i>ENST00000308819</i> | 1,00  | 9,71E-01 | 9,89E-01 |
| <i>PCSK1N</i>          | 1,00  | 9,71E-01 | 9,89E-01 |
| <i>THC2269349</i>      | 1,00  | 9,71E-01 | 9,89E-01 |
| <i>AK092163</i>        | 1,00  | 9,72E-01 | 9,89E-01 |
| <i>AK096981</i>        | 1,00  | 9,72E-01 | 9,89E-01 |
| <i>A_24_P324424</i>    | 1,00  | 9,72E-01 | 9,89E-01 |
| <i>BE379139</i>        | 1,00  | 9,72E-01 | 9,89E-01 |
| <i>LOC400573</i>       | 1,00  | 9,72E-01 | 9,89E-01 |
| <i>KARS</i>            | 1,00  | 9,72E-01 | 9,89E-01 |
| <i>MXD3</i>            | 1,00  | 9,72E-01 | 9,89E-01 |
| <i>TSPYL1</i>          | 1,00  | 9,72E-01 | 9,89E-01 |
| <i>FADS1</i>           | 1,00  | 9,72E-01 | 9,89E-01 |
| <i>PEBP1</i>           | 1,00  | 9,72E-01 | 9,90E-01 |
| <i>ANKRD39</i>         | 1,00  | 9,72E-01 | 9,90E-01 |
| <i>H45075</i>          | 1,00  | 9,72E-01 | 9,90E-01 |
| <i>BX119718</i>        | -1,01 | 9,72E-01 | 9,90E-01 |
| <i>THC2361491</i>      | 1,00  | 9,72E-01 | 9,90E-01 |
| <i>THC2318696</i>      | 1,00  | 9,72E-01 | 9,90E-01 |
| <i>CAPN9</i>           | 1,00  | 9,72E-01 | 9,90E-01 |
| <i>E2F4</i>            | 1,00  | 9,72E-01 | 9,90E-01 |
| <i>AI948509</i>        | 1,00  | 9,73E-01 | 9,90E-01 |
| <i>FLJ38482</i>        | 1,00  | 9,73E-01 | 9,90E-01 |
| <i>A_24_P358205</i>    | -1,00 | 9,73E-01 | 9,90E-01 |
| <i>AL831865</i>        | 1,00  | 9,73E-01 | 9,90E-01 |
| <i>RSHL1</i>           | 1,00  | 9,73E-01 | 9,90E-01 |
| <i>FLJ37543</i>        | 1,00  | 9,73E-01 | 9,90E-01 |
| <i>SUPT3H</i>          | 1,00  | 9,73E-01 | 9,90E-01 |
| <i>A_24_P144054</i>    | -1,01 | 9,73E-01 | 9,90E-01 |
| <i>ENST00000325769</i> | 1,00  | 9,73E-01 | 9,90E-01 |

|                        |       |          |          |
|------------------------|-------|----------|----------|
| <i>AI937689</i>        | 1,00  | 9,73E-01 | 9,90E-01 |
| <i>LOC653579</i>       | 1,00  | 9,73E-01 | 9,90E-01 |
| <i>POTE15</i>          | 1,00  | 9,73E-01 | 9,90E-01 |
| <i>AF152351</i>        | 1,00  | 9,73E-01 | 9,90E-01 |
| <i>ONECUT2</i>         | 1,00  | 9,73E-01 | 9,90E-01 |
| <i>MIP</i>             | 1,00  | 9,73E-01 | 9,90E-01 |
| <i>C4orf9</i>          | 1,00  | 9,74E-01 | 9,90E-01 |
| <i>ENST00000320925</i> | 1,00  | 9,74E-01 | 9,90E-01 |
| <i>SDAD1</i>           | 1,00  | 9,74E-01 | 9,90E-01 |
| <i>C6orf208</i>        | 1,00  | 9,74E-01 | 9,90E-01 |
| <i>ARRDC4</i>          | 1,00  | 9,74E-01 | 9,90E-01 |
| <i>COPS5</i>           | 1,00  | 9,74E-01 | 9,90E-01 |
| <i>AK7</i>             | 1,00  | 9,74E-01 | 9,90E-01 |
| <i>AB062477</i>        | 1,00  | 9,74E-01 | 9,90E-01 |
| <i>GTF2H2</i>          | 1,00  | 9,74E-01 | 9,90E-01 |
| <i>PPP2R3A</i>         | 1,00  | 9,74E-01 | 9,91E-01 |
| <i>C21orf2</i>         | 1,00  | 9,74E-01 | 9,91E-01 |
| <i>GPR149</i>          | 1,00  | 9,74E-01 | 9,91E-01 |
| <i>P15RS</i>           | 1,00  | 9,74E-01 | 9,91E-01 |
| <i>LOC283089</i>       | 1,00  | 9,74E-01 | 9,91E-01 |
| <i>LRCH3</i>           | 1,00  | 9,74E-01 | 9,91E-01 |
| <i>THC2343905</i>      | 1,00  | 9,75E-01 | 9,91E-01 |
| <i>GAK</i>             | 1,00  | 9,75E-01 | 9,91E-01 |
| <i>THC2439736</i>      | 1,00  | 9,75E-01 | 9,91E-01 |
| <i>Z25424</i>          | 1,00  | 9,75E-01 | 9,91E-01 |
| <i>ATP6AP1</i>         | 1,00  | 9,75E-01 | 9,91E-01 |
| <i>A_24_P333052</i>    | 1,01  | 9,75E-01 | 9,91E-01 |
| <i>THC2314754</i>      | 1,00  | 9,75E-01 | 9,91E-01 |
| <i>NFATC2IP</i>        | 1,00  | 9,75E-01 | 9,91E-01 |
| <i>SPATA12</i>         | 1,00  | 9,75E-01 | 9,91E-01 |
| <i>ALKBH6</i>          | 1,00  | 9,75E-01 | 9,91E-01 |
| <i>S57296</i>          | 1,00  | 9,75E-01 | 9,91E-01 |
| <i>A_24_P357836</i>    | -1,01 | 9,75E-01 | 9,91E-01 |
| <i>AK129982</i>        | 1,00  | 9,75E-01 | 9,91E-01 |
| <i>NDUFS3</i>          | 1,00  | 9,75E-01 | 9,91E-01 |
| <i>A_24_P914075</i>    | 1,00  | 9,75E-01 | 9,91E-01 |
| <i>C12orf61</i>        | 1,00  | 9,75E-01 | 9,91E-01 |
| <i>ENST00000329862</i> | 1,00  | 9,75E-01 | 9,91E-01 |
| <i>A_24_P558070</i>    | 1,00  | 9,75E-01 | 9,91E-01 |
| <i>CCT8</i>            | 1,00  | 9,75E-01 | 9,91E-01 |
| <i>A_32_P178017</i>    | 1,00  | 9,75E-01 | 9,91E-01 |
| <i>LOC339804</i>       | 1,00  | 9,76E-01 | 9,91E-01 |
| <i>FLJ36131</i>        | 1,00  | 9,76E-01 | 9,91E-01 |
| <i>CB243784</i>        | 1,00  | 9,76E-01 | 9,91E-01 |



|                        |       |          |          |
|------------------------|-------|----------|----------|
| <i>IL21</i>            | 1,00  | 9,76E-01 | 9,91E-01 |
| <i>LOC647038</i>       | 1,00  | 9,76E-01 | 9,91E-01 |
| <i>MOGAT2</i>          | 1,00  | 9,76E-01 | 9,91E-01 |
| <i>MCCD1</i>           | 1,00  | 9,76E-01 | 9,91E-01 |
| <i>A_32_P234485</i>    | 1,00  | 9,76E-01 | 9,91E-01 |
| <i>P4HA1</i>           | 1,00  | 9,76E-01 | 9,91E-01 |
| <i>A_23_P113811</i>    | 1,00  | 9,76E-01 | 9,91E-01 |
| <i>THC2238625</i>      | 1,01  | 9,76E-01 | 9,91E-01 |
| <i>SEC61B</i>          | 1,00  | 9,76E-01 | 9,91E-01 |
| <i>CTNND1</i>          | 1,00  | 9,76E-01 | 9,91E-01 |
| <i>MYT2</i>            | 1,00  | 9,76E-01 | 9,92E-01 |
| <i>VTCN1</i>           | 1,00  | 9,76E-01 | 9,92E-01 |
| <i>LDHAL6B</i>         | 1,00  | 9,76E-01 | 9,92E-01 |
| <i>GALNT12</i>         | 1,00  | 9,76E-01 | 9,92E-01 |
| <i>A_24_P340866</i>    | 1,00  | 9,76E-01 | 9,92E-01 |
| <i>THC2437715</i>      | 1,00  | 9,76E-01 | 9,92E-01 |
| <i>DHX36</i>           | 1,00  | 9,77E-01 | 9,92E-01 |
| <i>THC2361914</i>      | 1,00  | 9,77E-01 | 9,92E-01 |
| <i>NTNG2</i>           | 1,00  | 9,77E-01 | 9,92E-01 |
| <i>THC2375673</i>      | 1,00  | 9,77E-01 | 9,92E-01 |
| <i>MON1A</i>           | 1,00  | 9,77E-01 | 9,92E-01 |
| <i>AK127222</i>        | 1,00  | 9,77E-01 | 9,92E-01 |
| <i>ADRB1</i>           | 1,00  | 9,77E-01 | 9,92E-01 |
| <i>CENPH</i>           | 1,00  | 9,77E-01 | 9,92E-01 |
| <i>SLC35A3</i>         | 1,00  | 9,77E-01 | 9,92E-01 |
| <i>TDO2</i>            | 1,00  | 9,77E-01 | 9,92E-01 |
| <i>THC2343602</i>      | 1,00  | 9,77E-01 | 9,92E-01 |
| <i>A_24_P161914</i>    | 1,01  | 9,77E-01 | 9,92E-01 |
| <i>A_24_P932154</i>    | 1,00  | 9,77E-01 | 9,92E-01 |
| <i>A_24_P400702</i>    | 1,00  | 9,77E-01 | 9,92E-01 |
| <i>ZIC3</i>            | 1,00  | 9,77E-01 | 9,92E-01 |
| <i>ALKBH5</i>          | 1,00  | 9,77E-01 | 9,92E-01 |
| <i>TAS2R42</i>         | 1,00  | 9,78E-01 | 9,92E-01 |
| <i>KATNA1</i>          | 1,00  | 9,78E-01 | 9,92E-01 |
| <i>AMIGO1</i>          | 1,00  | 9,78E-01 | 9,92E-01 |
| <i>BX955634</i>        | 1,00  | 9,78E-01 | 9,92E-01 |
| <i>THC2348391</i>      | 1,00  | 9,78E-01 | 9,92E-01 |
| <i>BX100598</i>        | 1,00  | 9,78E-01 | 9,93E-01 |
| <i>DarkCorner</i>      | 1,00  | 9,78E-01 | 9,93E-01 |
| <i>MIS12</i>           | 1,00  | 9,78E-01 | 9,93E-01 |
| <i>ENST00000369697</i> | 1,00  | 9,78E-01 | 9,93E-01 |
| <i>A_24_P58759</i>     | -1,01 | 9,78E-01 | 9,93E-01 |
| <i>A_24_P471012</i>    | 1,00  | 9,78E-01 | 9,93E-01 |
| <i>BC040051</i>        | 1,00  | 9,78E-01 | 9,93E-01 |

|                        |       |          |          |
|------------------------|-------|----------|----------|
| <i>TMEM139</i>         | 1,00  | 9,78E-01 | 9,93E-01 |
| <i>C2orf37</i>         | 1,00  | 9,79E-01 | 9,93E-01 |
| <i>ENST00000315313</i> | 1,00  | 9,78E-01 | 9,93E-01 |
| <i>TRIM45</i>          | 1,00  | 9,79E-01 | 9,93E-01 |
| <i>ATP5G1</i>          | 1,00  | 9,79E-01 | 9,93E-01 |
| <i>ENST00000348624</i> | 1,00  | 9,79E-01 | 9,93E-01 |
| <i>A_24_P84112</i>     | 1,00  | 9,79E-01 | 9,93E-01 |
| <i>BC035184</i>        | 1,00  | 9,79E-01 | 9,93E-01 |
| <i>A_23_P46070</i>     | 1,00  | 9,79E-01 | 9,93E-01 |
| <i>ENST00000371316</i> | 1,00  | 9,79E-01 | 9,93E-01 |
| <i>BC047055</i>        | 1,00  | 9,79E-01 | 9,93E-01 |
| <i>BC015977</i>        | 1,00  | 9,79E-01 | 9,93E-01 |
| <i>RAB5B</i>           | 1,00  | 9,79E-01 | 9,93E-01 |
| <i>SLC9A1</i>          | 1,00  | 9,79E-01 | 9,93E-01 |
| <i>EFCAB4A</i>         | 1,00  | 9,79E-01 | 9,93E-01 |
| <i>SREBF2</i>          | 1,00  | 9,79E-01 | 9,93E-01 |
| <i>FLJ43390</i>        | 1,00  | 9,79E-01 | 9,93E-01 |
| <i>ENST00000340455</i> | 1,01  | 9,79E-01 | 9,93E-01 |
| <i>TRPS1</i>           | 1,00  | 9,79E-01 | 9,93E-01 |
| <i>A_24_P255509</i>    | 1,00  | 9,79E-01 | 9,93E-01 |
| <i>PLAC4</i>           | 1,00  | 9,79E-01 | 9,93E-01 |
| <i>BX103328</i>        | 1,00  | 9,80E-01 | 9,93E-01 |
| <i>C14orf153</i>       | 1,00  | 9,80E-01 | 9,93E-01 |
| <i>SPAG11</i>          | 1,00  | 9,79E-01 | 9,93E-01 |
| <i>AF085829</i>        | 1,00  | 9,80E-01 | 9,93E-01 |
| <i>A_24_P315954</i>    | 1,00  | 9,80E-01 | 9,93E-01 |
| <i>DYRK1B</i>          | 1,00  | 9,80E-01 | 9,93E-01 |
| <i>THC2279115</i>      | 1,00  | 9,80E-01 | 9,93E-01 |
| <i>A_32_P210311</i>    | 1,00  | 9,80E-01 | 9,93E-01 |
| <i>C12orf24</i>        | 1,01  | 9,80E-01 | 9,93E-01 |
| <i>A_32_P227158</i>    | 1,00  | 9,80E-01 | 9,93E-01 |
| <i>CR617033</i>        | 1,00  | 9,80E-01 | 9,93E-01 |
| <i>MGAT5B</i>          | 1,00  | 9,80E-01 | 9,93E-01 |
| <i>POTE14</i>          | 1,00  | 9,80E-01 | 9,93E-01 |
| <i>THC2265980</i>      | 1,00  | 9,80E-01 | 9,93E-01 |
| <i>LOC642927</i>       | 1,00  | 9,80E-01 | 9,93E-01 |
| <i>CPNE1</i>           | 1,00  | 9,80E-01 | 9,93E-01 |
| <i>TCAM1</i>           | 1,00  | 9,80E-01 | 9,93E-01 |
| <i>ENST00000359531</i> | 1,00  | 9,80E-01 | 9,93E-01 |
| <i>CYP4X1</i>          | 1,00  | 9,80E-01 | 9,93E-01 |
| <i>IVL</i>             | 1,01  | 9,80E-01 | 9,93E-01 |
| <i>A_24_P493116</i>    | -1,01 | 9,81E-01 | 9,93E-01 |
| <i>A_24_P358474</i>    | -1,01 | 9,81E-01 | 9,93E-01 |
| <i>BC009735</i>        | 1,00  | 9,81E-01 | 9,93E-01 |

|                        |      |          |          |
|------------------------|------|----------|----------|
| <i>C1orf49</i>         | 1,00 | 9,81E-01 | 9,93E-01 |
| <i>SMCR5</i>           | 1,00 | 9,81E-01 | 9,93E-01 |
| <i>ENST00000343903</i> | 1,00 | 9,81E-01 | 9,93E-01 |
| <i>ODF2L</i>           | 1,00 | 9,81E-01 | 9,93E-01 |
| <i>A_24_P556049</i>    | 1,00 | 9,80E-01 | 9,93E-01 |
| <i>USP4</i>            | 1,00 | 9,81E-01 | 9,93E-01 |
| <i>HNRPUL1</i>         | 1,00 | 9,81E-01 | 9,93E-01 |
| <i>HMGN1</i>           | 1,00 | 9,81E-01 | 9,93E-01 |
| <i>TMCO4</i>           | 1,00 | 9,80E-01 | 9,93E-01 |
| <i>KIAA0258</i>        | 1,00 | 9,81E-01 | 9,93E-01 |
| <i>EVI2A</i>           | 1,00 | 9,80E-01 | 9,93E-01 |
| <i>FANCC</i>           | 1,00 | 9,80E-01 | 9,93E-01 |
| <i>A_32_P112531</i>    | 1,00 | 9,81E-01 | 9,93E-01 |
| <i>THC2279377</i>      | 1,00 | 9,81E-01 | 9,93E-01 |
| <i>THC2375289</i>      | 1,00 | 9,81E-01 | 9,93E-01 |
| <i>CHKB</i>            | 1,00 | 9,81E-01 | 9,93E-01 |
| <i>ERGIC2</i>          | 1,00 | 9,81E-01 | 9,93E-01 |
| <i>TRIM34</i>          | 1,00 | 9,81E-01 | 9,93E-01 |
| <i>MAT1A</i>           | 1,00 | 9,81E-01 | 9,93E-01 |
| <i>A_24_P695223</i>    | 1,00 | 9,81E-01 | 9,93E-01 |
| <i>PRCC</i>            | 1,00 | 9,81E-01 | 9,93E-01 |
| <i>GNPNAT1</i>         | 1,00 | 9,81E-01 | 9,93E-01 |
| <i>37681</i>           | 1,00 | 9,81E-01 | 9,93E-01 |
| <i>LOC441177</i>       | 1,00 | 9,81E-01 | 9,93E-01 |
| <i>A_23_P392897</i>    | 1,00 | 9,81E-01 | 9,93E-01 |
| <i>A_24_P885910</i>    | 1,00 | 9,82E-01 | 9,94E-01 |
| <i>A_24_P341386</i>    | 1,00 | 9,81E-01 | 9,94E-01 |
| <i>HSD3B2</i>          | 1,00 | 9,82E-01 | 9,94E-01 |
| <i>CITED1</i>          | 1,00 | 9,82E-01 | 9,94E-01 |
| <i>AI650285</i>        | 1,00 | 9,82E-01 | 9,94E-01 |
| <i>C10orf12</i>        | 1,00 | 9,82E-01 | 9,94E-01 |
| <i>A_24_P161173</i>    | 1,00 | 9,82E-01 | 9,94E-01 |
| <i>THC2369865</i>      | 1,00 | 9,82E-01 | 9,94E-01 |
| <i>CN391963</i>        | 1,00 | 9,82E-01 | 9,94E-01 |
| <i>ANKRD27</i>         | 1,00 | 9,82E-01 | 9,94E-01 |
| <i>AL162073</i>        | 1,00 | 9,82E-01 | 9,94E-01 |
| <i>THC2313597</i>      | 1,00 | 9,82E-01 | 9,94E-01 |
| <i>LOC442285</i>       | 1,00 | 9,82E-01 | 9,94E-01 |
| <i>CLDN5</i>           | 1,00 | 9,82E-01 | 9,94E-01 |
| <i>BX108033</i>        | 1,00 | 9,82E-01 | 9,94E-01 |
| <i>AF334589</i>        | 1,00 | 9,82E-01 | 9,94E-01 |
| <i>AT_T_3</i>          | 1,00 | 9,82E-01 | 9,94E-01 |
| <i>MRPL42</i>          | 1,00 | 9,82E-01 | 9,94E-01 |
| <i>LAP3</i>            | 1,00 | 9,82E-01 | 9,94E-01 |

|                        |      |          |          |
|------------------------|------|----------|----------|
| <i>C17orf81</i>        | 1,00 | 9,82E-01 | 9,94E-01 |
| <i>ATP6V0C</i>         | 1,00 | 9,82E-01 | 9,94E-01 |
| <i>THC2441463</i>      | 1,00 | 9,82E-01 | 9,94E-01 |
| <i>SPAM1</i>           | 1,00 | 9,83E-01 | 9,94E-01 |
| <i>LOC541473</i>       | 1,00 | 9,83E-01 | 9,94E-01 |
| <i>CHCHD2</i>          | 1,00 | 9,83E-01 | 9,94E-01 |
| <i>A_24_P678056</i>    | 1,00 | 9,83E-01 | 9,94E-01 |
| <i>AL832582</i>        | 1,00 | 9,83E-01 | 9,94E-01 |
| <i>AK024566</i>        | 1,00 | 9,83E-01 | 9,94E-01 |
| <i>SMTN</i>            | 1,00 | 9,83E-01 | 9,94E-01 |
| <i>SUMO1</i>           | 1,00 | 9,83E-01 | 9,94E-01 |
| <i>A_23_P50131</i>     | 1,00 | 9,83E-01 | 9,94E-01 |
| <i>RGPD5</i>           | 1,01 | 9,83E-01 | 9,94E-01 |
| <i>PCDHGA8</i>         | 1,00 | 9,83E-01 | 9,94E-01 |
| <i>BF805854</i>        | 1,00 | 9,83E-01 | 9,94E-01 |
| <i>UNC119</i>          | 1,00 | 9,83E-01 | 9,94E-01 |
| <i>ATXN2L</i>          | 1,00 | 9,83E-01 | 9,94E-01 |
| <i>UBL4A</i>           | 1,00 | 9,83E-01 | 9,94E-01 |
| <i>THC2329407</i>      | 1,00 | 9,83E-01 | 9,94E-01 |
| <i>THC2376306</i>      | 1,00 | 9,83E-01 | 9,94E-01 |
| <i>LRRC15</i>          | 1,00 | 9,84E-01 | 9,95E-01 |
| <i>AW448973</i>        | 1,00 | 9,84E-01 | 9,95E-01 |
| <i>IFNA10</i>          | 1,00 | 9,84E-01 | 9,95E-01 |
| <i>S100A12</i>         | 1,00 | 9,84E-01 | 9,95E-01 |
| <i>A_24_P125311</i>    | 1,00 | 9,84E-01 | 9,95E-01 |
| <i>AF130112</i>        | 1,00 | 9,84E-01 | 9,95E-01 |
| <i>EIF2B5</i>          | 1,00 | 9,84E-01 | 9,95E-01 |
| <i>BE930400</i>        | 1,00 | 9,84E-01 | 9,95E-01 |
| <i>ENST00000355748</i> | 1,00 | 9,84E-01 | 9,95E-01 |
| <i>C12orf46</i>        | 1,00 | 9,84E-01 | 9,95E-01 |
| <i>RP3-452H17.2</i>    | 1,00 | 9,84E-01 | 9,95E-01 |
| <i>A_24_P400751</i>    | 1,00 | 9,84E-01 | 9,95E-01 |
| <i>SFRS6</i>           | 1,00 | 9,84E-01 | 9,95E-01 |
| <i>FGFRL1</i>          | 1,00 | 9,84E-01 | 9,95E-01 |
| <i>A_24_P926720</i>    | 1,00 | 9,84E-01 | 9,95E-01 |
| <i>LOC474338</i>       | 1,00 | 9,84E-01 | 9,95E-01 |
| <i>THC2305334</i>      | 1,00 | 9,84E-01 | 9,95E-01 |
| <i>PGBD1</i>           | 1,00 | 9,84E-01 | 9,95E-01 |
| <i>LOC283665</i>       | 1,00 | 9,85E-01 | 9,95E-01 |
| <i>A_23_P135063</i>    | 1,00 | 9,85E-01 | 9,95E-01 |
| <i>C7orf24</i>         | 1,00 | 9,85E-01 | 9,95E-01 |
| <i>PKHD1L1</i>         | 1,00 | 9,85E-01 | 9,95E-01 |
| <i>A_32_P98693</i>     | 1,00 | 9,85E-01 | 9,95E-01 |
| <i>AK090720</i>        | 1,00 | 9,85E-01 | 9,95E-01 |

|                        |       |          |          |
|------------------------|-------|----------|----------|
| <i>ENST00000370855</i> | 1,00  | 9,85E-01 | 9,95E-01 |
| <i>A_32_P165499</i>    | 1,00  | 9,85E-01 | 9,95E-01 |
| <i>THC2281057</i>      | 1,00  | 9,85E-01 | 9,95E-01 |
| <i>THC2339758</i>      | 1,00  | 9,85E-01 | 9,95E-01 |
| <i>Kikbl4</i>          | 1,00  | 9,85E-01 | 9,95E-01 |
| <i>FCAMR</i>           | 1,00  | 9,85E-01 | 9,95E-01 |
| <i>CV402334</i>        | 1,00  | 9,85E-01 | 9,95E-01 |
| <i>THC2334811</i>      | 1,00  | 9,85E-01 | 9,95E-01 |
| <i>GRHL3</i>           | -1,00 | 9,85E-01 | 9,95E-01 |
| <i>SELT</i>            | 1,00  | 9,85E-01 | 9,95E-01 |
| <i>C21orf71</i>        | 1,00  | 9,85E-01 | 9,95E-01 |
| <i>ENST00000370611</i> | 1,00  | 9,85E-01 | 9,95E-01 |
| <i>WDR42A</i>          | 1,00  | 9,85E-01 | 9,95E-01 |
| <i>RAB8B</i>           | 1,00  | 9,85E-01 | 9,95E-01 |
| <i>LOC643143</i>       | 1,00  | 9,85E-01 | 9,95E-01 |
| <i>DB362335</i>        | 1,00  | 9,86E-01 | 9,95E-01 |
| <i>SLC36A3</i>         | 1,00  | 9,86E-01 | 9,95E-01 |
| <i>SLC10A3</i>         | 1,00  | 9,86E-01 | 9,95E-01 |
| <i>AF034174</i>        | 1,00  | 9,86E-01 | 9,95E-01 |
| <i>TXNDC11</i>         | 1,00  | 9,86E-01 | 9,95E-01 |
| <i>THC2376764</i>      | 1,00  | 9,86E-01 | 9,95E-01 |
| <i>BU742669</i>        | 1,00  | 9,86E-01 | 9,95E-01 |
| <i>A_32_P141211</i>    | 1,00  | 9,86E-01 | 9,95E-01 |
| <i>NDUFB3</i>          | 1,00  | 9,86E-01 | 9,95E-01 |
| <i>MBL2</i>            | 1,00  | 9,86E-01 | 9,95E-01 |
| <i>EFEMP1</i>          | 1,00  | 9,86E-01 | 9,95E-01 |
| <i>MSMB</i>            | 1,00  | 9,86E-01 | 9,95E-01 |
| <i>A_24_P915764</i>    | 1,00  | 9,86E-01 | 9,96E-01 |
| <i>TMEM58</i>          | 1,00  | 9,86E-01 | 9,96E-01 |
| <i>A_24_P752208</i>    | 1,00  | 9,86E-01 | 9,96E-01 |
| <i>ENST00000281228</i> | 1,00  | 9,86E-01 | 9,96E-01 |
| <i>COL6A2</i>          | 1,00  | 9,86E-01 | 9,96E-01 |
| <i>AF086052</i>        | 1,00  | 9,87E-01 | 9,96E-01 |
| <i>WDR17</i>           | 1,00  | 9,87E-01 | 9,96E-01 |
| <i>A_24_P375870</i>    | 1,00  | 9,86E-01 | 9,96E-01 |
| <i>CNTNAP1</i>         | 1,00  | 9,87E-01 | 9,96E-01 |
| <i>ZRANB3</i>          | -1,01 | 9,87E-01 | 9,96E-01 |
| <i>THC2448166</i>      | 1,00  | 9,87E-01 | 9,96E-01 |
| <i>LOC645015</i>       | 1,00  | 9,87E-01 | 9,96E-01 |
| <i>LOC254128</i>       | 1,00  | 9,87E-01 | 9,96E-01 |
| <i>LRP8</i>            | 1,00  | 9,87E-01 | 9,96E-01 |
| <i>ENST00000367012</i> | 1,00  | 9,87E-01 | 9,96E-01 |
| <i>A_24_P932031</i>    | 1,00  | 9,87E-01 | 9,96E-01 |
| <i>A_24_P50639</i>     | 1,00  | 9,87E-01 | 9,96E-01 |

|                        |       |          |          |
|------------------------|-------|----------|----------|
| <i>DAPK2</i>           | 1,00  | 9,87E-01 | 9,96E-01 |
| <i>IL1F8</i>           | 1,00  | 9,87E-01 | 9,96E-01 |
| <i>CDC25B</i>          | 1,00  | 9,87E-01 | 9,96E-01 |
| <i>MFAP3L</i>          | 1,00  | 9,87E-01 | 9,96E-01 |
| <i>H6PD</i>            | 1,00  | 9,88E-01 | 9,96E-01 |
| <i>LOC440799</i>       | 1,00  | 9,88E-01 | 9,96E-01 |
| <i>FBXO31</i>          | 1,00  | 9,88E-01 | 9,96E-01 |
| <i>BF826743</i>        | 1,00  | 9,88E-01 | 9,96E-01 |
| <i>RUVBL1</i>          | 1,00  | 9,88E-01 | 9,96E-01 |
| <i>ARMC8</i>           | 1,00  | 9,88E-01 | 9,96E-01 |
| <i>MEOX2</i>           | 1,00  | 9,88E-01 | 9,96E-01 |
| <i>CNR1</i>            | 1,00  | 9,88E-01 | 9,96E-01 |
| <i>AF264621</i>        | 1,00  | 9,88E-01 | 9,96E-01 |
| <i>MYF6</i>            | 1,00  | 9,88E-01 | 9,96E-01 |
| <i>APOA1BP</i>         | 1,00  | 9,88E-01 | 9,96E-01 |
| <i>GP6</i>             | 1,00  | 9,88E-01 | 9,96E-01 |
| <i>C1orf61</i>         | 1,00  | 9,88E-01 | 9,96E-01 |
| <i>CSAG3A</i>          | 1,00  | 9,88E-01 | 9,96E-01 |
| <i>THC2434747</i>      | 1,00  | 9,88E-01 | 9,96E-01 |
| <i>LOC285986</i>       | 1,00  | 9,88E-01 | 9,96E-01 |
| <i>ARID1A</i>          | 1,00  | 9,88E-01 | 9,96E-01 |
| <i>NRAP</i>            | 1,00  | 9,88E-01 | 9,96E-01 |
| <i>TBC1D10B</i>        | 1,00  | 9,88E-01 | 9,96E-01 |
| <i>SUMF1</i>           | 1,00  | 9,88E-01 | 9,96E-01 |
| <i>AK057956</i>        | 1,00  | 9,88E-01 | 9,96E-01 |
| <i>A_32_P103162</i>    | 1,00  | 9,89E-01 | 9,96E-01 |
| <i>DDR1</i>            | 1,00  | 9,89E-01 | 9,97E-01 |
| <i>KRT6C</i>           | -1,01 | 9,89E-01 | 9,97E-01 |
| <i>FAM83H</i>          | 1,00  | 9,89E-01 | 9,97E-01 |
| <i>MFSD1</i>           | 1,00  | 9,89E-01 | 9,97E-01 |
| <i>ENST00000314394</i> | 1,00  | 9,89E-01 | 9,97E-01 |
| <i>AK095242</i>        | 1,00  | 9,89E-01 | 9,97E-01 |
| <i>AGTPBP1</i>         | 1,00  | 9,89E-01 | 9,97E-01 |
| <i>A_24_P204144</i>    | 1,00  | 9,89E-01 | 9,97E-01 |
| <i>DGCR2</i>           | 1,00  | 9,89E-01 | 9,97E-01 |
| <i>SVIL</i>            | 1,00  | 9,89E-01 | 9,97E-01 |
| <i>A_23_P216581</i>    | 1,00  | 9,89E-01 | 9,97E-01 |
| <i>BX091245</i>        | 1,00  | 9,90E-01 | 9,97E-01 |
| <i>LRR38</i>           | 1,00  | 9,90E-01 | 9,97E-01 |
| <i>ENST00000355551</i> | 1,00  | 9,90E-01 | 9,97E-01 |
| <i>SLC23A1</i>         | 1,00  | 9,90E-01 | 9,97E-01 |
| <i>BU164445</i>        | 1,00  | 9,90E-01 | 9,97E-01 |
| <i>BC038757</i>        | 1,00  | 9,90E-01 | 9,97E-01 |
| <i>SPO11</i>           | 1,00  | 9,90E-01 | 9,97E-01 |

|                        |       |          |          |
|------------------------|-------|----------|----------|
| <i>BQ321120</i>        | 1,00  | 9,90E-01 | 9,97E-01 |
| <i>RAI16</i>           | 1,00  | 9,90E-01 | 9,97E-01 |
| <i>GKN1</i>            | 1,00  | 9,90E-01 | 9,97E-01 |
| <i>LOC644420</i>       | 1,00  | 9,90E-01 | 9,97E-01 |
| <i>KIN</i>             | 1,00  | 9,90E-01 | 9,97E-01 |
| <i>THC2342907</i>      | 1,00  | 9,90E-01 | 9,97E-01 |
| <i>MGC27348</i>        | 1,00  | 9,90E-01 | 9,97E-01 |
| <i>STX5</i>            | 1,00  | 9,90E-01 | 9,97E-01 |
| <i>AW167080</i>        | 1,00  | 9,90E-01 | 9,97E-01 |
| <i>BF960555</i>        | 1,00  | 9,90E-01 | 9,97E-01 |
| <i>CF143262</i>        | 1,00  | 9,90E-01 | 9,97E-01 |
| <i>A_24_P942151</i>    | 1,00  | 9,90E-01 | 9,97E-01 |
| <i>BX114801</i>        | 1,00  | 9,90E-01 | 9,97E-01 |
| <i>A_24_P925222</i>    | 1,00  | 9,90E-01 | 9,97E-01 |
| <i>A_24_P759241</i>    | 1,00  | 9,90E-01 | 9,97E-01 |
| <i>SLC37A4</i>         | -1,00 | 9,90E-01 | 9,97E-01 |
| <i>THC2325908</i>      | 1,00  | 9,91E-01 | 9,98E-01 |
| <i>WDR69</i>           | 1,00  | 9,91E-01 | 9,98E-01 |
| <i>LOC643194</i>       | 1,00  | 9,91E-01 | 9,98E-01 |
| <i>FIBP</i>            | 1,00  | 9,91E-01 | 9,98E-01 |
| <i>PPIL5</i>           | 1,00  | 9,91E-01 | 9,98E-01 |
| <i>LY6G6C</i>          | 1,00  | 9,91E-01 | 9,98E-01 |
| <i>FLJ31568</i>        | 1,00  | 9,91E-01 | 9,98E-01 |
| <i>CHR415SYT</i>       | 1,00  | 9,91E-01 | 9,98E-01 |
| <i>ENST00000329627</i> | 1,00  | 9,91E-01 | 9,98E-01 |
| <i>BMP1</i>            | 1,00  | 9,92E-01 | 9,98E-01 |
| <i>ENST00000311528</i> | 1,00  | 9,92E-01 | 9,98E-01 |
| <i>GAD1</i>            | 1,00  | 9,92E-01 | 9,98E-01 |
| <i>HIST1H2BE</i>       | 1,00  | 9,92E-01 | 9,98E-01 |
| <i>XKR5</i>            | 1,00  | 9,92E-01 | 9,98E-01 |
| <i>LIPH</i>            | 1,00  | 9,92E-01 | 9,98E-01 |
| <i>R3HDM2</i>          | 1,00  | 9,92E-01 | 9,98E-01 |
| <i>TEKT3</i>           | 1,00  | 9,92E-01 | 9,98E-01 |
| <i>THC2364604</i>      | 1,00  | 9,92E-01 | 9,98E-01 |
| <i>AA766126</i>        | 1,00  | 9,92E-01 | 9,98E-01 |
| <i>SPR</i>             | 1,00  | 9,92E-01 | 9,98E-01 |
| <i>AK026192</i>        | 1,00  | 9,92E-01 | 9,98E-01 |
| <i>THC2441708</i>      | 1,00  | 9,92E-01 | 9,98E-01 |
| <i>A_32_P82119</i>     | 1,00  | 9,92E-01 | 9,98E-01 |
| <i>OSBPL3</i>          | 1,00  | 9,92E-01 | 9,98E-01 |
| <i>THC2277879</i>      | 1,00  | 9,92E-01 | 9,98E-01 |
| <i>THC2419642</i>      | 1,00  | 9,93E-01 | 9,98E-01 |
| <i>APBA2</i>           | 1,00  | 9,93E-01 | 9,98E-01 |
| <i>BC033977</i>        | 1,00  | 9,93E-01 | 9,98E-01 |

|                 |      |          |          |
|-----------------|------|----------|----------|
| AA748674        | 1,00 | 9,93E-01 | 9,98E-01 |
| ENST00000259550 | 1,00 | 9,93E-01 | 9,98E-01 |
| THC2273762      | 1,00 | 9,93E-01 | 9,98E-01 |
| CDC42SE2        | 1,00 | 9,93E-01 | 9,98E-01 |
| ZFYVE9          | 1,00 | 9,93E-01 | 9,98E-01 |
| THC2288230      | 1,00 | 9,93E-01 | 9,98E-01 |
| THC2340639      | 1,00 | 9,93E-01 | 9,99E-01 |
| THC2339566      | 1,00 | 9,93E-01 | 9,99E-01 |
| TMTC2           | 1,00 | 9,93E-01 | 9,99E-01 |
| AK023756        | 1,00 | 9,94E-01 | 9,99E-01 |
| LOC391356       | 1,00 | 9,93E-01 | 9,99E-01 |
| KRT86           | 1,00 | 9,94E-01 | 9,99E-01 |
| THC2349274      | 1,00 | 9,93E-01 | 9,99E-01 |
| ST8SIA5         | 1,00 | 9,93E-01 | 9,99E-01 |
| CA438802        | 1,00 | 9,94E-01 | 9,99E-01 |
| DSG4            | 1,00 | 9,94E-01 | 9,99E-01 |
| YWHAQ           | 1,00 | 9,93E-01 | 9,99E-01 |
| MTIF2           | 1,00 | 9,93E-01 | 9,99E-01 |
| AI435457        | 1,00 | 9,93E-01 | 9,99E-01 |
| A_24_P925052    | 1,00 | 9,94E-01 | 9,99E-01 |
| tAKR            | 1,00 | 9,93E-01 | 9,99E-01 |
| PDC             | 1,00 | 9,93E-01 | 9,99E-01 |
| MYLC2PL         | 1,00 | 9,94E-01 | 9,99E-01 |
| TMEM52          | 1,00 | 9,94E-01 | 9,99E-01 |
| CNNM4           | 1,00 | 9,94E-01 | 9,99E-01 |
| LIG3            | 1,00 | 9,94E-01 | 9,99E-01 |
| AW089125        | 1,00 | 9,94E-01 | 9,99E-01 |
| A_24_P349606    | 1,00 | 9,93E-01 | 9,99E-01 |
| RNF166          | 1,00 | 9,93E-01 | 9,99E-01 |
| A_24_P280933    | 1,00 | 9,93E-01 | 9,99E-01 |
| A_24_P273074    | 1,00 | 9,94E-01 | 9,99E-01 |
| ENST00000332804 | 1,00 | 9,94E-01 | 9,99E-01 |
| BRCA2           | 1,00 | 9,94E-01 | 9,99E-01 |
| ENST00000383518 | 1,00 | 9,94E-01 | 9,99E-01 |
| LYCAT           | 1,00 | 9,94E-01 | 9,99E-01 |
| BICD2           | 1,00 | 9,94E-01 | 9,99E-01 |
| TMEM86B         | 1,00 | 9,94E-01 | 9,99E-01 |
| HSPD1           | 1,00 | 9,94E-01 | 9,99E-01 |
| RBM9            | 1,00 | 9,94E-01 | 9,99E-01 |
| TNNT2           | 1,00 | 9,94E-01 | 9,99E-01 |
| A_24_P112542    | 1,00 | 9,94E-01 | 9,99E-01 |
| VIPR1           | 1,00 | 9,94E-01 | 9,99E-01 |
| A_24_P322908    | 1,00 | 9,94E-01 | 9,99E-01 |
| AK000313        | 1,00 | 9,94E-01 | 9,99E-01 |



|                        |      |          |          |
|------------------------|------|----------|----------|
| <i>CB850536</i>        | 1,00 | 9,94E-01 | 9,99E-01 |
| <i>BHLHB8</i>          | 1,00 | 9,95E-01 | 9,99E-01 |
| <i>MEF2C</i>           | 1,00 | 9,94E-01 | 9,99E-01 |
| <i>NXPH1</i>           | 1,00 | 9,95E-01 | 9,99E-01 |
| <i>TIRAP</i>           | 1,00 | 9,95E-01 | 9,99E-01 |
| <i>BX118285</i>        | 1,00 | 9,95E-01 | 9,99E-01 |
| <i>IL29</i>            | 1,00 | 9,95E-01 | 9,99E-01 |
| <i>FLJ22709</i>        | 1,00 | 9,95E-01 | 9,99E-01 |
| <i>C2orf39</i>         | 1,00 | 9,95E-01 | 9,99E-01 |
| <i>THC2314822</i>      | 1,00 | 9,95E-01 | 9,99E-01 |
| <i>CAPG</i>            | 1,00 | 9,95E-01 | 9,99E-01 |
| <i>GLYATL2</i>         | 1,00 | 9,95E-01 | 9,99E-01 |
| <i>KCNMB3</i>          | 1,00 | 9,95E-01 | 9,99E-01 |
| <i>LOC222699</i>       | 1,00 | 9,95E-01 | 9,99E-01 |
| <i>BQ009471</i>        | 1,00 | 9,95E-01 | 9,99E-01 |
| <i>ENST00000308437</i> | 1,00 | 9,95E-01 | 9,99E-01 |
| <i>CEP152</i>          | 1,00 | 9,95E-01 | 9,99E-01 |
| <i>A_24_P860248</i>    | 1,00 | 9,95E-01 | 9,99E-01 |
| <i>SLC25A13</i>        | 1,00 | 9,95E-01 | 9,99E-01 |
| <i>AK094875</i>        | 1,00 | 9,95E-01 | 9,99E-01 |
| <i>AW275011</i>        | 1,00 | 9,95E-01 | 9,99E-01 |
| <i>AK022793</i>        | 1,00 | 9,95E-01 | 9,99E-01 |
| <i>PRPF8</i>           | 1,00 | 9,95E-01 | 9,99E-01 |
| <i>AK091569</i>        | 1,00 | 9,95E-01 | 9,99E-01 |
| <i>MGAM</i>            | 1,00 | 9,95E-01 | 9,99E-01 |
| <i>BX095557</i>        | 1,00 | 9,95E-01 | 9,99E-01 |
| <i>SYT14</i>           | 1,00 | 9,95E-01 | 9,99E-01 |
| <i>A_32_P164503</i>    | 1,00 | 9,95E-01 | 9,99E-01 |
| <i>C17orf76</i>        | 1,00 | 9,96E-01 | 9,99E-01 |
| <i>ZNF222</i>          | 1,00 | 9,95E-01 | 9,99E-01 |
| <i>AL157439</i>        | 1,00 | 9,96E-01 | 9,99E-01 |
| <i>PSME4</i>           | 1,00 | 9,96E-01 | 9,99E-01 |
| <i>ENST00000333926</i> | 1,00 | 9,96E-01 | 9,99E-01 |
| <i>A_24_P212654</i>    | 1,00 | 9,96E-01 | 9,99E-01 |
| <i>SSH3</i>            | 1,00 | 9,96E-01 | 9,99E-01 |
| <i>STK3</i>            | 1,00 | 9,96E-01 | 9,99E-01 |
| <i>FLJ35767</i>        | 1,00 | 9,96E-01 | 9,99E-01 |
| <i>CR603982</i>        | 1,00 | 9,96E-01 | 9,99E-01 |
| <i>CENPI</i>           | 1,00 | 9,96E-01 | 9,99E-01 |
| <i>AK055470</i>        | 1,00 | 9,96E-01 | 9,99E-01 |
| <i>AK027178</i>        | 1,00 | 9,96E-01 | 9,99E-01 |
| <i>NPR1</i>            | 1,00 | 9,96E-01 | 9,99E-01 |
| <i>KCNIP3</i>          | 1,00 | 9,96E-01 | 9,99E-01 |
| <i>GPR87</i>           | 1,00 | 9,96E-01 | 9,99E-01 |

|              |      |          |          |
|--------------|------|----------|----------|
| THC2411712   | 1,00 | 9,96E-01 | 9,99E-01 |
| SDC1         | 1,00 | 9,96E-01 | 9,99E-01 |
| SLC9A3       | 1,00 | 9,96E-01 | 9,99E-01 |
| LOC642863    | 1,00 | 9,96E-01 | 9,99E-01 |
| LOC153811    | 1,00 | 9,96E-01 | 9,99E-01 |
| LOC653115    | 1,00 | 9,97E-01 | 9,99E-01 |
| LRRRC21      | 1,00 | 9,97E-01 | 9,99E-01 |
| A_24_P392622 | 1,00 | 9,97E-01 | 9,99E-01 |
| THC2282995   | 1,00 | 9,97E-01 | 9,99E-01 |
| BG778254     | 1,00 | 9,97E-01 | 9,99E-01 |
| AL564305     | 1,00 | 9,97E-01 | 9,99E-01 |
| LAMP2        | 1,00 | 9,97E-01 | 9,99E-01 |
| IGSF3        | 1,00 | 9,97E-01 | 9,99E-01 |
| FLJ25801     | 1,00 | 9,97E-01 | 9,99E-01 |
| A_23_P129405 | 1,00 | 9,97E-01 | 9,99E-01 |
| PMFBP1       | 1,00 | 9,97E-01 | 9,99E-01 |
| MEP1A        | 1,00 | 9,97E-01 | 9,99E-01 |
| PLCB3        | 1,00 | 9,97E-01 | 9,99E-01 |
| AA424402     | 1,00 | 9,97E-01 | 9,99E-01 |
| BE612944     | 1,00 | 9,97E-01 | 9,99E-01 |
| KCNH5        | 1,00 | 9,97E-01 | 9,99E-01 |
| FBXL6        | 1,00 | 9,97E-01 | 9,99E-01 |
| RNF26        | 1,00 | 9,97E-01 | 9,99E-01 |
| THC2280863   | 1,00 | 9,97E-01 | 9,99E-01 |
| BF085047     | 1,00 | 9,97E-01 | 9,99E-01 |
| FDPS         | 1,00 | 9,97E-01 | 9,99E-01 |
| A_32_P59532  | 1,00 | 9,97E-01 | 9,99E-01 |
| BQ933774     | 1,00 | 9,97E-01 | 9,99E-01 |
| RRAS         | 1,00 | 9,97E-01 | 9,99E-01 |
| AK022443     | 1,00 | 9,97E-01 | 9,99E-01 |
| CRELD2       | 1,00 | 9,97E-01 | 9,99E-01 |
| SHOX2        | 1,00 | 9,97E-01 | 9,99E-01 |
| A_24_P375962 | 1,00 | 9,97E-01 | 9,99E-01 |
| PPP1R14A     | 1,00 | 9,97E-01 | 9,99E-01 |
| THC2339880   | 1,00 | 9,98E-01 | 1,00E+00 |
| PTGER1       | 1,00 | 9,98E-01 | 1,00E+00 |
| LOC285498    | 1,00 | 9,98E-01 | 1,00E+00 |
| THC2369888   | 1,00 | 9,98E-01 | 1,00E+00 |
| SCGB1D2      | 1,00 | 9,98E-01 | 1,00E+00 |
| RP11-311P8.3 | 1,00 | 9,98E-01 | 1,00E+00 |
| AY090769     | 1,00 | 9,98E-01 | 1,00E+00 |
| SRPX2        | 1,00 | 9,99E-01 | 1,00E+00 |
| BC030568     | 1,00 | 9,99E-01 | 1,00E+00 |
| ZMAT3        | 1,00 | 9,98E-01 | 1,00E+00 |

|                        |      |          |          |
|------------------------|------|----------|----------|
| <i>A_24_P169855</i>    | 1,00 | 9,99E-01 | 1,00E+00 |
| <i>AK057820</i>        | 1,00 | 9,99E-01 | 1,00E+00 |
| <i>RFPL3</i>           | 1,00 | 9,98E-01 | 1,00E+00 |
| <i>RB1</i>             | 1,00 | 9,99E-01 | 1,00E+00 |
| <i>A_24_P127181</i>    | 1,00 | 9,99E-01 | 1,00E+00 |
| <i>AL522622</i>        | 1,00 | 9,98E-01 | 1,00E+00 |
| <i>GDAP1L1</i>         | 1,00 | 9,99E-01 | 1,00E+00 |
| <i>SLC27A2</i>         | 1,00 | 9,99E-01 | 1,00E+00 |
| <i>TCBA1</i>           | 1,00 | 9,99E-01 | 1,00E+00 |
| <i>BX423609</i>        | 1,00 | 9,98E-01 | 1,00E+00 |
| <i>LOC134147</i>       | 1,00 | 9,99E-01 | 1,00E+00 |
| <i>FOXE3</i>           | 1,00 | 9,99E-01 | 1,00E+00 |
| <i>A_24_P916004</i>    | 1,00 | 9,99E-01 | 1,00E+00 |
| <i>BF761218</i>        | 1,00 | 9,99E-01 | 1,00E+00 |
| <i>SCLY</i>            | 1,00 | 9,99E-01 | 1,00E+00 |
| <i>PSMB5</i>           | 1,00 | 9,99E-01 | 1,00E+00 |
| <i>GSTK1</i>           | 1,00 | 9,99E-01 | 1,00E+00 |
| <i>EXTL3</i>           | 1,00 | 9,99E-01 | 1,00E+00 |
| <i>SCAP</i>            | 1,00 | 9,99E-01 | 1,00E+00 |
| <i>PIK3AP1</i>         | 1,00 | 9,99E-01 | 1,00E+00 |
| <i>ENST00000318438</i> | 1,00 | 9,99E-01 | 1,00E+00 |
| <i>MGC29891</i>        | 1,00 | 9,99E-01 | 1,00E+00 |
| <i>C6orf65</i>         | 1,00 | 9,99E-01 | 1,00E+00 |
| <i>SPAR</i>            | 1,00 | 9,99E-01 | 1,00E+00 |
| <i>FLJ44796</i>        | 1,00 | 9,99E-01 | 1,00E+00 |
| <i>SETD2</i>           | 1,00 | 9,98E-01 | 1,00E+00 |
| <i>AK056689</i>        | 1,00 | 9,98E-01 | 1,00E+00 |
| <i>MAGEC2</i>          | 1,00 | 9,98E-01 | 1,00E+00 |
| <i>ENST00000340612</i> | 1,00 | 9,99E-01 | 1,00E+00 |
| <i>A_32_P142521</i>    | 1,00 | 9,99E-01 | 1,00E+00 |
| <i>A_32_P181725</i>    | 1,00 | 9,98E-01 | 1,00E+00 |
| <i>CASP8</i>           | 1,00 | 9,99E-01 | 1,00E+00 |
| <i>ENST00000303246</i> | 1,00 | 9,98E-01 | 1,00E+00 |
| <i>A_24_P233560</i>    | 1,00 | 9,98E-01 | 1,00E+00 |
| <i>SLC28A2</i>         | 1,00 | 9,99E-01 | 1,00E+00 |
| <i>FKSG2</i>           | 1,00 | 9,99E-01 | 1,00E+00 |
| <i>TMEM45A</i>         | 1,00 | 9,98E-01 | 1,00E+00 |
| <i>RSPO2</i>           | 1,00 | 9,98E-01 | 1,00E+00 |
| <i>TTC19</i>           | 1,00 | 9,99E-01 | 1,00E+00 |
| <i>LOC285957</i>       | 1,00 | 9,99E-01 | 1,00E+00 |
| <i>CFB</i>             | 1,00 | 1,00E+00 | 1,00E+00 |
| <i>THC2370450</i>      | 1,00 | 1,00E+00 | 1,00E+00 |
| <i>A_24_P490463</i>    | 1,00 | 1,00E+00 | 1,00E+00 |
| <i>LOC400831</i>       | 1,00 | 1,00E+00 | 1,00E+00 |

|                    |      |          |          |
|--------------------|------|----------|----------|
| <i>A_24_P75948</i> | 1,00 | 1,00E+00 | 1,00E+00 |
| <i>POLA2</i>       | 1,00 | 1,00E+00 | 1,00E+00 |
| <i>SLC9A3R1</i>    | 1,00 | 1,00E+00 | 1,00E+00 |
| <i>SYDE1</i>       | 1,00 | 1,00E+00 | 1,00E+00 |
| <i>OR7G3</i>       | 1,00 | 1,00E+00 | 1,00E+00 |
| <i>AA176161</i>    | 1,00 | 1,00E+00 | 1,00E+00 |
| <i>LTK</i>         | 1,00 | 1,00E+00 | 1,00E+00 |
| <i>RNF10</i>       | 1,00 | 1,00E+00 | 1,00E+00 |
| <i>AA693701</i>    | 1,00 | 1,00E+00 | 1,00E+00 |
